# Supplementary material
Source: MDPI journal article supplement (https://www.mdpi.com/2673-3897/3/1/3)
Supplement: s1 [file s1]

Table S1: List of genes and their primers used for quantitative real time RT-PCR

| Gene name<br>( <i>Gene symbol</i> )                                                | Accession number<br>(mRNA RefSeq) | Primer sequences <sup>1</sup>                           |
|------------------------------------------------------------------------------------|-----------------------------------|---------------------------------------------------------|
| Adenylate cyclase 5<br>( <i>ADCY5</i> )                                            | JV050413                          | GAGGATGAAGTGGATGAG (s)<br>CAGATGAAGAGGAAGACG (as)       |
| Adiponectin receptor 1<br>( <i>ADPORA1</i> )                                       | NM_001261175                      | CAGGAAGAAGAGGAGGAG (s)<br>TGTAGCAGATAGTCATTGTC (as)     |
| Apoptosis, caspase<br>activation inhibitor<br>( <i>AVEN</i> )                      | JU490006                          | GAAGTGTGATGGCAAGG (s)<br>CTGAGAATCCGTTGAAGG (as)        |
| Beta actin<br>( <i>ACTB</i> ) <sup>2</sup>                                         | NM_001033084                      | GTGCGTGACATTAAGGAG (s)<br>AGGAAGGAAGGTTGGAAG (as)       |
| Beta-2-microglobulin<br>( <i>B2M</i> ) <sup>2</sup>                                | NM_001047137                      | AGATGTCTCGCTCAGTGG (s)<br>AGTCAACTTCAATATCAGATGG (as)   |
| Cholinergic receptor<br>nicotinic, delta ( <i>CHRNA4</i> )                         | XM_002799072                      | GCCGACAGTGGTGAGAAGAC (s)<br>GGAGATGAGCAGCAGGAAGAC (as)  |
| Foxhead box D3<br>( <i>FOXD3</i> )                                                 | NM_001198733                      | CAGAGCCCGCAGAAGAAG (s)<br>GCAGTCGTTGAGTGAGAGG (as)      |
| Glyceraldehyde 3 phosphate<br>dehydrogenase ( <i>GAPDH</i> ) <sup>2</sup>          | NM_002046                         | CGACAACGAATATGGCTA (s)<br>CTGGGAAGGAAAGAAGGG (as)       |
| Gap Junction protein, delta<br>4, 40 kDa ( <i>GJD4</i> )                           | XM_001094309                      | GCTCTGGTTCGTCCTCAC (s)<br>TCCTGCTCGTCCTGGTAG (as)       |
| Mitogen-activated protein<br>kinase 8 interacting<br>protein 3 ( <i>MAPK8IP3</i> ) | JV461656                          | CAGGGTGGGATTTCTCAG (s)<br>ACTTAGTAGCGTGTCTGG (as)       |
| Meckel syndrome 1<br>( <i>MKS1</i> )                                               | JV688066                          | AGAAGGAAGGAAGGAAGG (s)<br>CCAAGCAGTAGAATGAGG (as)       |
| Nicotinamide-N methyl<br>transferase ( <i>NNMT</i> )                               | XM_001086727                      | GATTGGCGAGCAGAAGTTC (s)<br>GGTCACAGGCATCACAGG (as)      |
| Nucleoporin 50 kDa<br>( <i>NUP50</i> )                                             | NM_001265689                      | TGCGAATCAGAAGACACAGC (s)<br>TGGAACACAGACGATAAGAACG (as) |
| Phosphatidylinositol                                                               | JV043498                          | GTTCTCCAGTCACACGATACATTC (s)                            |

|                                                                           |              |                                                         |
|---------------------------------------------------------------------------|--------------|---------------------------------------------------------|
| glycan anchor biosynthesis<br>receptor V ( <i>PIGV</i> )                  |              | GGCAGCACAGGCAGTTCC (as)                                 |
| Protein associated<br>with topoisomerase II<br>homolog I ( <i>PATL1</i> ) | JV703655     | CTCTCCTCCTCTATCATCTTCC (s)<br>GTCTTCACCACGGCTCAG (as)   |
| Transforming growth factor<br>beta receptor II ( <i>TGFBR2</i> )          | JV592166     | TCTGTTTGGATGTTGGAAAGTCTC (s)<br>GCCCTATGGTGCGAGTGG (as) |
| Tox high mobility<br>group box family<br>member 2 ( <i>TOX2</i> )         | JV699322     | ACCGTTTCGTCATCCTCA (s)<br>AAGTCGTCGCTGGCAATG (as)       |
| von Willebrand Factor A<br>domain containing 5B1<br>( <i>VWA5B1</i> )     | XM_001108622 | CTCTCCTGAACACTGATG (s)<br>TGATGATGATGCTCTTGG (as)       |

---

<sup>1</sup>primers were designed using Beacon Designer Software (Premier Biosoft, Palo Alto, CA, USA) based on gene sequences retrieved from NCBI data base. <sup>2</sup>housekeeping gene. as, anti-sense. s, sense.

Table S2: Details of primary antibodies against target antigens

| Serial number | Antigen (Alias)                                                 | Final concentration (µg/ml) |
|---------------|-----------------------------------------------------------------|-----------------------------|
| 1.            | Adenylate cyclase 5 (ADCY5) <sup>a</sup>                        | 4.0                         |
| 2.            | Apoptosis, caspase activation (AVEN) <sup>a</sup>               | 4.0                         |
| 3.            | Cholinergic receptor nicotinic, delta CHRND) <sup>b</sup>       | 4.0                         |
| 4.            | Connexin 40.1 (GJD4) <sup>b</sup>                               | 2.0                         |
| 5.            | Foxhead box D3 (FOXD3) <sup>b</sup>                             | 2.0                         |
| 6.            | Meckel syndrome1 (MKS1) <sup>b</sup>                            | 2.0                         |
| 7.            | Nicotinamide-N-methyl transferase (NNMT) <sup>c</sup>           | 4.0                         |
| 8.            | Transforming growth factor beta receptor 2 (TGFB2) <sup>b</sup> | 4.0                         |
| 9.            | TOX high mobility group box family 2 (TOX2) <sup>a</sup>        | 4.0                         |
| 10.           | von Willebrand factor A containing 5B1 (VWA5B1) <sup>a</sup>    | 4.0                         |

<sup>a</sup>goat polyclonal. <sup>b</sup>rabbit polyclonal. <sup>c</sup>mouse monoclonal.

Table S3: List of expressed genes in the endometrium of Conception cycle

**(1) Expressed in groups 1a, 1b and 1c**

| Gene name                                                                                                              | Gene symbol | Entrez Gene ID |
|------------------------------------------------------------------------------------------------------------------------|-------------|----------------|
| 1-acylglycerol-3-phosphate O-acyltransferase 1                                                                         | AGPAT1      | 717174         |
| 3-hydroxyanthranilate 3,4-dioxygenase                                                                                  | HAAO        | 713101         |
| 5-phosphohydroxy-L-lysine phospho-lyase                                                                                | PHYKPL      | 702302         |
| 8-oxoguanine DNA glycosylase                                                                                           | OGG1        | 700481         |
| Aarf domain containing kinase 2                                                                                        | ADCK2       | 693303         |
| Aarf domain containing kinase 4                                                                                        | ADCK4       | 702379         |
| Abhydrolase domain containing 1                                                                                        | ABHD1       | 698700         |
| Abhydrolase domain containing 8                                                                                        | ABHD8       | 718980         |
| Achaete-scute family bhlh transcription factor 1                                                                       | ASCL1       | 698820         |
| Acid phosphatase 7, tartrate resistant (putative)                                                                      | ACP7        | 695532         |
| Acidic nuclear phosphoprotein 32 family member E                                                                       | ANP32E      | 706251         |
| Acrosin binding protein                                                                                                | ACRBP       | 713219         |
| Actin like 7B                                                                                                          | ACTL7B      | 710750         |
| Actinin, alpha 2                                                                                                       | ACTN2       | 710012         |
| Activating transcription factor 3                                                                                      | ATF3        | 710832         |
| ADAM metalloproteinase domain 19                                                                                       | ADAM19      | 715164         |
| ADAM metalloproteinase domain 2                                                                                        | ADAM2       | 707303         |
| ADAM metalloproteinase with thrombospondin type 1 motif 14                                                             | ADAMTS14    | 710154         |
| ADAM metalloproteinase with thrombospondin type 1 motif 16                                                             | ADAMTS16    | 694474         |
| ADAM metalloproteinase with thrombospondin type 1 motif 20                                                             | ADAMTS20    | 699935         |
| ADAMTS like 2                                                                                                          | ADAMTSL2    | 713492         |
| Adaptor related protein complex 1 associated regulatory protein                                                        | AP1AR       | 700734         |
| Adaptor related protein complex 2, mu 1 subunit                                                                        | AP2M1       | 703554         |
| Adaptor related protein complex 3, beta 2 subunit                                                                      | AP3B2       | 694091         |
| Adenosine deaminase domain containing 1                                                                                | ADAD1       | 707910         |
| Adenylate cyclase 4                                                                                                    | ADCY4       | 714684         |
| Adenylate cyclase 6                                                                                                    | ADCY6       | 707978         |
| Adhesion molecule with Ig-like domain 2                                                                                | AMIGO2      | 705386         |
| A-kinase anchoring protein 12                                                                                          | AKAP12      | 641446         |
| Aladin WD repeat nucleoporin                                                                                           | AAAS        | 719095         |
| Aldo-keto reductase family 1, member A1 (aldehyde reductase)                                                           | AKR1A1      | 693380         |
| Aldo-keto reductase family 1, member C1 (dihydrodiol dehydrogenase 1; 20-alpha (3-alpha)-hydroxysteroid dehydrogenase) | AKR1C1      | 711198         |
| Alkaline ceramidase 1                                                                                                  | ACER1       | 699093         |
| Alkb homolog 2, alpha-ketoglutarate-dependent dioxygenase                                                              | ALKBH2      | 706708         |
| Alkb homolog 4, lysine demethylase                                                                                     | ALKBH4      | 715078         |
| Alpha hemoglobin stabilizing protein                                                                                   | AHSP        | 714392         |
| Alpha-2-HS-glycoprotein                                                                                                | AHSG        | 699348         |
| Amine oxidase, copper containing 2                                                                                     | AOC2        | 100431015      |
| Aminoacylase 3                                                                                                         | ACY3        | 711083         |

|                                                                        |          |           |
|------------------------------------------------------------------------|----------|-----------|
| Aminocarboxymuconate semialdehyde decarboxylase                        | ACMSD    | 708917    |
| Amyloid beta (A4) precursor protein-binding, family B, member 1 (Fe65) | APBB1    | 712585    |
| Amyloid beta (A4) precursor-like protein 2                             | APLP2    | 718819    |
| Anaphase promoting complex subunit 2                                   | ANAPC2   | 706384    |
| Ancient ubiquitous protein 1                                           | AUP1     | 710020    |
| Angiopoietin like 7                                                    | ANGPTL7  | 714204    |
| Ankyrin repeat and IBR domain containing 1                             | ANKIB1   | 703273    |
| Ankyrin repeat and SOCS box containing 3                               | ASB3     | 716503    |
| Ankyrin repeat domain 1 (cardiac muscle)                               | ANKRD1   | 696653    |
| Ankyrin repeat domain 13C                                              | ANKRD13C | 702811    |
| Ankyrin repeat domain 2 (stretch responsive muscle)                    | ANKRD2   | 707097    |
| Ankyrin repeat domain 49                                               | ANKRD49  | 697693    |
| Ankyrin repeat domain 6                                                | ANKRD6   | 701339    |
| Anti-silencing function 1A histone chaperone                           | ASF1A    | 714761    |
| Apolipoprotein B mrna editing enzyme, catalytic polypeptide-like 3G    | APOBEC3G | 574398    |
| Apolipoprotein B mrna editing enzyme, catalytic polypeptide-like 3H    | APOBEC3H | 723811    |
| Apolipoprotein C-III                                                   | APOC3    | 696726    |
| Apoptosis inducing factor, mitochondria associated 1                   | AIFM1    | 702773    |
| Apoptosis inducing factor, mitochondria associated 3                   | AIFM3    | 100430573 |
| Aprataxin                                                              | APTIX    | 702671    |
| Aquaporin 4                                                            | AQP4     | 703773    |
| Aquaporin 8                                                            | AQP8     | 702167    |
| Arachidonate 5-lipoxygenase-activating protein                         | ALOX5AP  | 713170    |
| Arfgap with rhogap domain, ankyrin repeat and PH domain 3              | ARAP3    | 701400    |
| Arginine/serine-rich coiled-coil 2                                     | RSRC2    | 706564    |
| ARP3 actin-related protein 3 homolog B (yeast)                         | ACTR3B   | 715965    |
| Artemin                                                                | ARTN     | 701641    |
| Ash2 (absent, small, or homeotic)-like (Drosophila)                    | ASH2L    | 699382    |
| Ataxin 2-like                                                          | ATXN2L   | 708359    |
| ATP binding cassette subfamily G member 2 (Junior blood group)         | ABCG2    | 574307    |
| ATP binding cassette subfamily G member 8                              | ABCG8    | 713676    |
| ATP citrate lyase                                                      | ACLY     | 708501    |
| ATP synthase F0 subunit 6                                              | ATP6     | 2846629   |
| ATPase, class II, type 9A                                              | ATP9A    | 710250    |
| ATPase, H <sup>+</sup> transporting, lysosomal 14kda, V1 subunit F     | ATP6V1F  | 702112    |
| ATPase, H <sup>+</sup> /K <sup>+</sup> exchanging, alpha polypeptide   | ATP4A    | 100426215 |
| ATP-binding cassette transporter 13                                    | ABCC13   | 574326    |
| Atypical chemokine receptor 1 (Duffy blood group)                      | ACKR1    | 719284    |
| Autophagy related 2A                                                   | ATG2A    | 717290    |
| Autophagy related 7                                                    | ATG7     | 696238    |
| B9 protein domain 2                                                    | B9D2     | 704873    |
| BAI1-associated protein 2-like 2                                       | BAIAP2L2 | 700058    |
| Bardet-Biedl syndrome 9                                                | BBS9     | 708412    |
| Basic leucine zipper transcription factor, ATF-like 2                  | BATF2    | 722022    |
| Basic transcription factor 3-like 4                                    | BTF3L4   | 712955    |

|                                                                   |           |           |
|-------------------------------------------------------------------|-----------|-----------|
| B-cell CLL/lymphoma 9                                             | BCL9      | 700800    |
| B-cell receptor-associated protein 31                             | BCAP31    | 696663    |
| BCL2 associated athanogene 2                                      | BAG2      | 712778    |
| BCL2/adenovirus E1B 19kda interacting protein 1                   | BNIP1     | 703576    |
| BCL2-associated X protein                                         | BAX       | 718948    |
| BCS1-like (S. Cerevisiae)                                         | BCS1L     | 699690    |
| Beclin 1, autophagy related                                       | BECN1     | 711649    |
| Beta-1,3-galactosyltransferase 1                                  | B3GALT1   | 704744    |
| Beta-1,3-galactosyltransferase 4                                  | B3GALT4   | 718178    |
| Beta-1,4-glucuronyltransferase 1                                  | B4GAT1    | 714270    |
| Beta-2-microglobulin                                              | B2M       | 712428    |
| Bloom syndrome, recq helicase-like                                | BLM       | 703460    |
| Bone morphogenetic protein 1                                      | BMP1      | 707596    |
| Bone morphogenetic protein receptor type IA                       | BMPRI1A   | 696898    |
| BPI fold containing family A member 2                             | BPIFA2    | 710376    |
| BPI fold containing family C                                      | BPIFC     | 717287    |
| Brain and reproductive organ-expressed (TNFRSF1A modulator)       | BRE       | 702365    |
| Breast cancer anti-estrogen resistance 1                          | BCAR1     | 713965    |
| BRICHOS domain containing 5                                       | BRICD5    | 695765    |
| Bromodomain adjacent to zinc finger domain 1B                     | BAZ1B     | 716436    |
| Bromodomain containing 2                                          | BRD2      | 717893    |
| C1GALT1 specific chaperone 1                                      | C1GALT1C1 | 696662    |
| Cadherin 11, type 2, OB-cadherin (osteoblast)                     | CDH11     | 708826    |
| Cadherin 17, LI cadherin (liver-intestine)                        | CDH17     | 698886    |
| Cadherin related family member 2                                  | CDHR2     | 697249    |
| Calcium homeostasis modulator 2                                   | CALHM2    | 714662    |
| Calcium/calmodulin-dependent protein kinase II delta              | CAMK2D    | 702504    |
| Calcium/calmodulin-dependent protein kinase kinase 1, alpha       | CAMKK1    | 707562    |
| Calcium/calmodulin-dependent serine protein kinase (MAGUK family) | CASK      | 707428    |
| Calponin 3, acidic                                                | CNN3      | 709538    |
| Calreticulin                                                      | CALR      | 716910    |
| Cannabinoid receptor 2                                            | CNR2      | 711155    |
| Carboxypeptidase N subunit 2                                      | CPN2      | 106997189 |
| Carnitine palmitoyltransferase 1A (liver)                         | CPT1A     | 709837    |
| Casein kinase 1, alpha 1-like                                     | CSNK1A1L  | 695190    |
| Casein kinase 2, beta polypeptide                                 | CSNK2B    | 715807    |
| CASK interacting protein 2                                        | CASKIN2   | 702477    |
| Caspase 8 associated protein 2                                    | CASP8AP2  | 702294    |
| Caspase recruitment domain family member 18                       | CARD18    | 705678    |
| Catalase                                                          | CAT       | 717406    |
| Cathepsin C                                                       | CTSC      | 705320    |
| Cbl proto-oncogene B, E3 ubiquitin protein ligase                 | CBLB      | 703879    |
| CCCTC-binding factor (zinc finger protein)-like                   | CTCF      | 701500    |
| CCR4-NOT transcription complex subunit 1                          | CNOT1     | 712880    |
| CD14 molecule                                                     | CD14      | 697482    |
| CD19 molecule                                                     | CD19      | 705211    |
| CD1c molecule                                                     | CD1C      | 717148    |

|                                                            |             |           |
|------------------------------------------------------------|-------------|-----------|
| CD40 ligand                                                | CD40LG      | 574160    |
| CD53 molecule                                              | CD53        | 702350    |
| CD63 molecule                                              | CD63        | 709828    |
| CD79b molecule                                             | CD79B       | 718218    |
| CD8b molecule                                              | CD8B        | 699409    |
| Cell death-inducing DFFA-like effector b                   | CIDEB       | 100425328 |
| Cell division cycle 6                                      | CDC6        | 700081    |
| Cell growth regulator with ring finger domain 1            | CGRRF1      | 695231    |
| Centrin 1                                                  | CETN1       | 697701    |
| Centrobin, centrosomal BRCA2 interacting protein           | CNTROB      | 716660    |
| Centrosomal protein 41kda                                  | CEP41       | 703215    |
| Centrosomal protein 57kda-like 1                           | CEP57L1     | 700109    |
| Centrosomal protein 85kda-like                             | CEP85L      | 714810    |
| Cerberus 1, DAN family BMP antagonist                      | CER1        | 713924    |
| Cerebellar degeneration-related protein 2-like             | CDR2L       | 700082    |
| Cerebral cavernous malformation 2                          | CCM2        | 705037    |
| Ceroid-lipofuscinosis, neuronal 6, late infantile, variant | CLN6        | 693873    |
| Chaperonin containing TCP1, subunit 5 (epsilon)            | CCT5        | 696640    |
| Chemokine (C-C motif) ligand 18                            | CCL18       | 574181    |
| Chemokine (C-C motif) ligand 7                             | CCL7        | 714751    |
| Chemokine (C-X-C motif) receptor 3                         | CXCR3       | 699438    |
| Chitinase domain containing 1                              | CHID1       | 701435    |
| Choline kinase beta                                        | CHKB        | 716377    |
| Choline O-acetyltransferase                                | CHAT        | 709977    |
| Cholinergic receptor, nicotinic alpha 3                    | CHRNA3      | 716571    |
| Chondroitin polymerizing factor                            | CHPF        | 703860    |
| Chondroitin sulfate N-acetylgalactosaminyltransferase 1    | CSGALNACT1  | 704901    |
| Chromodomain helicase DNA binding protein 3                | CHD3        | 716508    |
| Chromodomain helicase DNA binding protein 4                | CHD4        | 713162    |
| Chromosome 1 open reading frame, human c1orf198            | C1H1orf198  | 714084    |
| Chromosome 1 open reading frame, human c1orf54             | C1H1orf54   | 107000835 |
| Chromosome 10 open reading frame 93 ortholog               | C9H10orf93  | 719561    |
| Chromosome 11 open reading frame, human c12orf57           | C11H12orf57 | 714482    |
| Chromosome 13 open reading frame, human c2orf49            | C13H2orf49  | 713165    |
| Chromosome 15 open reading frame, human c9orf16            | C15H9orf16  | 722628    |
| Chromosome 16 open reading frame, human c17orf49           | C16H17orf49 | 713820    |
| Chromosome 19 open reading frame, human c19orf24           | C19H19orf24 | 706393    |
| Chromosome 3 open reading frame, human c21orf91            | C3H21orf91  | 710406    |
| Chromosome 5 open reading frame, human c4orf45             | C5H4orf45   | 100427199 |
| Chromosome 6 open reading frame, human c5orf22             | C6H5orf22   | 695901    |
| Chromosome 7 open reading frame, human c14orf166           | C7H14orf166 | 710094    |
| Chromosome 7 open reading frame, human c14orf169           | C7H14orf169 | 696773    |
| Chromosome 8 open reading frame, human c8orf59             | C8H8orf59   | 703464    |
| Chromosome X open reading frame, human cxorf40a            | CXHXorf40A  | 702659    |
| Cilia and flagella associated protein 65                   | CFAP65      | 701296    |
| Ciliary neurotrophic factor                                | CNTF        | 701907    |
| Ciliogenesis associated TTC17 interacting protein          | CATIP       | 698579    |
| Clarín 3                                                   | CLRN3       | 697496    |

|                                                             |          |           |
|-------------------------------------------------------------|----------|-----------|
| Claudin 16                                                  | CLDN16   | 704442    |
| Claudin 17                                                  | CLDN17   | 705582    |
| Claudin 20                                                  | CLDN20   | 701937    |
| Clavesin 2                                                  | CLVS2    | 713626    |
| Cleavage and polyadenylation specific factor 1              | CPSF1    | 702082    |
| Cleavage and polyadenylation specific factor 4              | CPSF4    | 708119    |
| Cleft lip and palate associated transmembrane protein 1     | CLPTM1   | 718306    |
| Clpb homolog, mitochondrial AAA ATPase chaperonin           | CLPB     | 718461    |
| CNKSR family member 3                                       | CNKSR3   | 702627    |
| Coatmer protein complex subunit epsilon                     | COPE     | 719631    |
| Cofilin 1 (non-muscle)                                      | CFL1     | 721882    |
| Cofilin 2 (muscle)                                          | CFL2     | 693875    |
| Coiled-coil domain containing 102B                          | CCDC102B | 710808    |
| Coiled-coil domain containing 142                           | CCDC142  | 709014    |
| Coiled-coil domain containing 148                           | CCDC148  | 698322    |
| Coiled-coil domain containing 17                            | CCDC17   | 706591    |
| Coiled-coil domain containing 22                            | CCDC22   | 713063    |
| Coiled-coil domain containing 62                            | CCDC62   | 707179    |
| Coiled-coil domain containing 69                            | CCDC69   | 713304    |
| Coiled-coil domain containing 82                            | CCDC82   | 700198    |
| Coiled-coil domain containing 86                            | CCDC86   | 695978    |
| Coiled-coil domain containing 92                            | CCDC92   | 705922    |
| Coiled-coil-helix-coiled-coil-helix domain containing 2     | CHCHD2   | 702967    |
| Colipase                                                    | CLPS     | 719005    |
| Collagen, type III, alpha 1                                 | COL3A1   | 574131    |
| Collagen, type VI, alpha 3                                  | COL6A3   | 694701    |
| Colony stimulating factor 3 receptor                        | CSF3R    | 713485    |
| COMM domain containing 9                                    | COMMMD9  | 716992    |
| Complement component 1, q subcomponent, C chain             | C1QC     | 708589    |
| Complement component 1, s subcomponent                      | C1S      | 714589    |
| Complement component 3a receptor 1                          | C3AR1    | 716086    |
| Complement factor properdin                                 | CFP      | 707386    |
| Contactin 1                                                 | CNTN1    | 574365    |
| Copine III                                                  | CPNE3    | 694013    |
| Cornichon family AMPA receptor auxiliary protein 1          | CNIH1    | 695002    |
| Cornulin                                                    | CRNN     | 712894    |
| COX19 cytochrome c oxidase assembly homolog (S. Cerevisiae) | COX19    | 696368    |
| Creatine kinase, brain                                      | CKB      | 711167    |
| Crumbs family member 3                                      | CRB3     | 700086    |
| Cryptochrome circadian clock 2                              | CRY2     | 715000    |
| C-src tyrosine kinase                                       | CSK      | 702868    |
| CTD small phosphatase 2                                     | CTDSP2   | 715956    |
| CTP synthase 2                                              | CTPS2    | 721014    |
| C-type lectin domain family 12 member A                     | CLEC12A  | 722319    |
| CUE domain containing 2                                     | CUEDC2   | 713243    |
| C-x(9)-C motif containing 4                                 | CMC4     | 100423505 |
| Cyclin D binding myb-like transcription factor 1            | DMTF1    | 706292    |
| Cyclin D3                                                   | CCND3    | 695215    |



|                                                               |         |        |
|---------------------------------------------------------------|---------|--------|
| Cyclin Pas1/PHO80 domain containing 1                         | CNPPD1  | 704271 |
| Cyclin-dependent kinase 4                                     | CDK4    | 715650 |
| Cyclin-dependent kinase 8                                     | CDK8    | 709761 |
| Cyclin-dependent kinase-like 1 (CDC2-related kinase)          | CDKL1   | 705975 |
| Cystatin C                                                    | CST3    | 574313 |
| Cysteine-serine-rich nuclear protein 2                        | CSRNP2  | 694549 |
| Cystinosin, lysosomal cystine transporter                     | CTNS    | 706721 |
| Cytidine deaminase                                            | CDA     | 705913 |
| Cytochrome P450, family 2, subfamily D, polypeptide 6         | CYP2D6  | 678691 |
| Cytochrome P450, family 2, subfamily E, polypeptide 1         | CYP2E1  | 678688 |
| Cytochrome P450c17                                            | CYP17A1 | 678693 |
| Cytotoxic and regulatory T-cell molecule                      | CRTAM   | 707560 |
| Dachsous cadherin-related 1                                   | DCHS1   | 711938 |
| D-amino-acid oxidase                                          | DAO     | 706373 |
| DAZ associated protein 2                                      | DAZAP2  | 695282 |
| DAZ interacting zinc finger protein 1-like                    | DZIP1L  | 716551 |
| Dcmp deaminase                                                | DCTD    | 700995 |
| DC-STAMP domain containing 2                                  | DCST2   | 717224 |
| DDB1 and CUL4 associated factor 10                            | DCAF10  | 716256 |
| DDB1 and CUL4 associated factor 11                            | DCAF11  | 714867 |
| DEAD (Asp-Glu-Ala-Asp) box helicase 42                        | DDX42   | 717964 |
| DEAD (Asp-Glu-Ala-Asp) box polypeptide 19B                    | DDX19B  | 709576 |
| DEAD (Asp-Glu-Ala-Asp) box polypeptide 41                     | DDX41   | 700742 |
| DEAD (Asp-Glu-Ala-Asp) box polypeptide 50                     | DDX50   | 712511 |
| DEAH (Asp-Glu-Ala-Asp/His) box polypeptide 57                 | DHX57   | 713523 |
| DEAH (Asp-Glu-Ala-His) box polypeptide 38                     | DHX38   | 709173 |
| DEAH (Asp-Glu-Ala-His) box polypeptide 40                     | DHX40   | 715202 |
| Dedicator of cytokinesis 2                                    | DOCK2   | 704061 |
| Dedicator of cytokinesis 5                                    | DOCK5   | 711359 |
| Dehydrogenase/reductase (SDR family) member 3                 | DHRS3   | 715548 |
| DENN/MADD domain containing 4A                                | DENND4A | 709675 |
| Denticleless E3 ubiquitin protein ligase homolog (Drosophila) | DTL     | 711236 |
| Deoxyhypusine synthase                                        | DHPS    | 716213 |
| Dihydropyrimidine dehydrogenase                               | DPYD    | 715672 |
| Dihydrouridine synthase 1-like                                | DUS1L   | 715662 |
| Discs, large (Drosophila) homolog-associated protein 4        | DLGAP4  | 702928 |
| Dishevelled segment polarity protein 2                        | DVL2    | 714381 |
| DMRT like family B with proline rich C-terminal 1             | DMRTB1  | 714424 |
| Dnaj heat shock protein family (Hsp40) member B2              | DNAJB2  | 702936 |
| Dnaj heat shock protein family (Hsp40) member C27             | DNAJC27 | 694037 |
| Dnaj heat shock protein family (Hsp40) member C3              | DNAJC3  | 695757 |
| Docking protein 5                                             | DOK5    | 698689 |
| DR1-associated protein 1 (negative cofactor 2 alpha)          | DRAP1   | 715271 |
| Drosha, ribonuclease type III                                 | DROSHA  | 692081 |
| DTW domain containing 1                                       | DTWD1   | 715084 |
| DTW domain containing 2                                       | DTWD2   | 697989 |
| Dual oxidase maturation factor 2                              | DUOXA2  | 712992 |
| Dual specificity phosphatase 22                               | DUSP22  | 705824 |

|                                                                     |           |        |
|---------------------------------------------------------------------|-----------|--------|
| Dual specificity tyrosine-(Y)-phosphorylation regulated kinase 2    | DYRK2     | 717941 |
| Dynactin subunit 4                                                  | DCTN4     | 712783 |
| Dyskeratosis congenita 1, dyskerin                                  | DKC1      | 702563 |
| Dystroglycan 1                                                      | DAG1      | 706179 |
| Dystrophia myotonica protein kinase                                 | DMPK      | 715328 |
| E1A binding protein p300                                            | EP300     | 706258 |
| E74-like factor 2 (ets domain transcription factor)                 | ELF2      | 696760 |
| Ectodysplasin A receptor                                            | EDAR      | 695059 |
| EF-hand and coiled-coil domain containing 1                         | EFCC1     | 706444 |
| EGF-like-domain, multiple 7                                         | EGFL7     | 709840 |
| EGF-like-domain, multiple 8                                         | EGFL8     | 717145 |
| ELAV like neuron-specific RNA binding protein 2                     | ELAVL2    | 708195 |
| ELK1, member of ETS oncogene family                                 | ELK1      | 712610 |
| ELOVL fatty acid elongase 4                                         | ELOVL4    | 692070 |
| Endonuclease domain containing 1                                    | ENDOD1    | 699210 |
| Enhancer of mrna decapping 3                                        | EDC3      | 709182 |
| Enhancer of polycomb homolog 2 (Drosophila)                         | EPC2      | 721916 |
| Enhancer of rudimentary homolog (Drosophila)                        | ERH       | 712507 |
| Ephrin-B1                                                           | EFNB1     | 694149 |
| ERGIC and golgi 3                                                   | ERGIC3    | 704736 |
| Ethylmalonic encephalopathy 1                                       | ETHE1     | 718089 |
| Eukaryotic translation elongation factor 1 beta 2                   | EEF1B2    | 707019 |
| Eukaryotic translation elongation factor 1 gamma                    | EEF1G     | 722274 |
| Eukaryotic translation initiation factor 2B subunit epsilon         | EIF2B5    | 703673 |
| Eukaryotic translation initiation factor 2B subunit gamma           | EIF2B3    | 705862 |
| Eukaryotic translation initiation factor 3 subunit F                | EIF3F     | 706269 |
| Eukaryotic translation initiation factor 3 subunit L                | EIF3L     | 699189 |
| Eukaryotic translation initiation factor 4E nuclear import factor 1 | EIF4ENIF1 | 716871 |
| Eukaryotic translation initiation factor 4H                         | EIF4H     | 693429 |
| EWS RNA binding protein 1                                           | EWSR1     | 714432 |
| Exocyst complex component 2                                         | EXOC2     | 706296 |
| Exosome component 8                                                 | EXOSC8    | 695071 |
| Exostosin glycosyltransferase 1                                     | EXT1      | 701488 |
| FAD-dependent oxidoreductase domain containing 1                    | FOXRED1   | 714271 |
| Family with sequence similarity 127, member A                       | FAM127A   | 708766 |
| Family with sequence similarity 134 member A                        | FAM134A   | 704378 |
| Family with sequence similarity 178 member B                        | FAM178B   | 710890 |
| Family with sequence similarity 181 member B                        | FAM181B   | 701184 |
| Family with sequence similarity 186 member B                        | FAM186B   | 711001 |
| Family with sequence similarity 206 member A                        | FAM206A   | 710486 |
| Family with sequence similarity 234 member A                        | FAM234A   | 694729 |
| Family with sequence similarity 3 member A                          | FAM3A     | 701159 |
| Family with sequence similarity 53 member C                         | FAM53C    | 714176 |
| Family with sequence similarity 71 member C                         | FAM71C    | 694296 |
| Family with sequence similarity 83 member A                         | FAM83A    | 704023 |
| Family with sequence similarity 89 member B                         | FAM89B    | 721925 |
| Fanconi anemia complementation group B                              | FANCB     | 712083 |
| Fanconi anemia complementation group G                              | FANCG     | 698837 |

|                                                        |         |        |
|--------------------------------------------------------|---------|--------|
| Fanconi anemia complementation group I                 | FANCI   | 699878 |
| Fanconi anemia core complex associated protein 100     | FAAP100 | 713876 |
| Far upstream element (FUSE) binding protein 3          | FUBP3   | 722470 |
| FBJ murine osteosarcoma viral oncogene homolog         | FOS     | 702077 |
| F-box and leucine-rich repeat protein 6                | FBXL6   | 701594 |
| F-box protein 6                                        | FBXO6   | 722740 |
| F-box protein 7                                        | FBXO7   | 717317 |
| Fc fragment of igg, receptor, transporter, alpha       | FCGRT   | 718859 |
| Fc receptor-like B                                     | FCRLB   | 720028 |
| Fem-1 homolog b (C. Elegans)                           | FEM1B   | 693955 |
| Fermitin family member 3                               | FERMT3  | 722120 |
| Ferritin mitochondrial                                 | FTMT    | 699743 |
| Fibroblast growth factor 20                            | FGF20   | 701847 |
| Fibroblast growth factor receptor 1                    | FGFR1   | 700126 |
| Ficolin 2                                              | FCN2    | 712486 |
| Filamin A, alpha                                       | FLNA    | 699524 |
| Filamin binding LIM protein 1                          | FBLIM1  | 695727 |
| FK506 binding protein 10                               | FKBP10  | 707881 |
| FK506 binding protein 8                                | FKBP8   | 720232 |
| Folate receptor 2 (fetal)                              | FOLR2   | 718405 |
| Follicular dendritic cell secreted protein             | FDCSP   | 707784 |
| Folliculogenesis specific bhlh transcription factor    | FIGLA   | 710606 |
| Follistatin like 1                                     | FSTL1   | 713367 |
| Forkhead box R2                                        | FOXR2   | 704032 |
| Four and a half LIM domains 3                          | FHL3    | 715313 |
| Fucokinase                                             | FUK     | 709226 |
| Fuzzy planar cell polarity protein                     | FUZ     | 719442 |
| FXYP domain containing ion transport regulator 7       | FXYP7   | 718457 |
| FYN proto-oncogene, Src family tyrosine kinase         | FYN     | 574214 |
| G protein pathway suppressor 1                         | GPS1    | 719343 |
| G protein-coupled bile acid receptor 1                 | GPBAR1  | 697937 |
| G protein-coupled receptor 1                           | GPR1    | 707120 |
| G protein-coupled receptor 12                          | GPR12   | 710030 |
| G protein-coupled receptor 137                         | GPR137  | 717722 |
| G protein-coupled receptor 141                         | GPR141  | 705700 |
| G protein-coupled receptor 182                         | GPR182  | 713866 |
| G protein-coupled receptor 19                          | GPR19   | 697072 |
| G protein-coupled receptor 31                          | GPR31   | 717158 |
| G protein-coupled receptor 50                          | GPR50   | 703817 |
| G protein-coupled receptor kinase 7                    | GRK7    | 714916 |
| G protein-coupled receptor, class C, group 5, member B | GPRC5B  | 695204 |
| G protein-coupled receptor, class C, group 5, member D | GPRC5D  | 698898 |
| G2/M-phase specific E3 ubiquitin protein ligase        | G2E3    | 717021 |
| Gamma-aminobutyric acid (GABA) B receptor, 1           | GABBR1  | 708987 |
| Gamma-glutamylcyclotransferase                         | GGCT    | 695547 |
| Gamma-glutamyltransferase 5                            | GGT5    | 720345 |
| Gastrulation brain homeobox 2                          | GBX2    | 693901 |
| General transcription factor IIIH subunit 4            | GTF2H4  | 714285 |

|                                                                                               |          |           |
|-----------------------------------------------------------------------------------------------|----------|-----------|
| General transcription factor IIH subunit 5                                                    | GTF2H5   | 700107    |
| Germinal center-associated, signaling and motility                                            | GCSAM    | 707891    |
| GLE1, RNA export mediator                                                                     | GLE1     | 717474    |
| Glucagon-like peptide 2 receptor                                                              | GLP2R    | 717783    |
| Glucose 6 phosphatase, catalytic, 3                                                           | G6PC3    | 714276    |
| Glucose-6-phosphate dehydrogenase                                                             | G6PD     | 701137    |
| Glucose-fructose oxidoreductase domain containing 1                                           | GFOD1    | 700607    |
| Glucosidase, beta (bile acid) 2                                                               | GBA2     | 696062    |
| Glutamate receptor, ionotropic, kainate 1                                                     | GRIK1    | 705699    |
| Glutamate receptor, ionotropic, N-methyl D-aspartate-associated protein 1 (glutamate binding) | GRINA    | 708234    |
| Glutaminase                                                                                   | GLS      | 693520    |
| Glutathione S-transferase alpha 4                                                             | GSTA4    | 709666    |
| Glutathione S-transferase kappa 1                                                             | GSTK1    | 704240    |
| Glutathione S-transferase pi 1                                                                | GSTP1    | 721704    |
| Glyceraldehyde-3-phosphate dehydrogenase                                                      | GAPDH    | 574353    |
| Glycogen synthase 2                                                                           | GYS2     | 706152    |
| Glycosylated lysosomal membrane protein                                                       | GLMP     | 719468    |
| Golgi-associated, gamma adaptin ear containing, ARF binding protein 1                         | GGA1     | 697929    |
| Golgi-associated, gamma adaptin ear containing, ARF binding protein 3                         | GGA3     | 705751    |
| GRB2-related adaptor protein                                                                  | GRAP     | 702473    |
| GRIP and coiled-coil domain containing 1                                                      | GCC1     | 697975    |
| Group-specific component (vitamin D binding protein)                                          | GC       | 705708    |
| Growth arrest and DNA damage inducible alpha                                                  | GADD45A  | 701054    |
| Growth associated protein 43                                                                  | GAP43    | 711260    |
| Growth differentiation factor 3                                                               | GDF3     | 715605    |
| Gse1 coiled-coil protein                                                                      | GSE1     | 693298    |
| Gtpase, IMAP family member 1                                                                  | GIMAP1   | 100424486 |
| Guanidinoacetate N-methyltransferase                                                          | GAMT     | 721263    |
| Guanine nucleotide binding protein (G protein), beta polypeptide 1                            | GNB1     | 703399    |
| Guanine nucleotide binding protein (G protein), beta polypeptide 2-like 1                     | GNB2L1   | 708526    |
| Guanylate cyclase activator 1B                                                                | GUCA1B   | 695658    |
| Guanylate kinase 1                                                                            | GUK1     | 695272    |
| H2A histone family, member Z                                                                  | H2AFZ    | 709326    |
| HAUS augmin like complex subunit 8                                                            | HAUS8    | 718874    |
| Heat shock factor binding protein 1                                                           | HSBP1    | 714498    |
| Heat shock protein 90kda alpha family class B member 1                                        | HSP90AB1 | 702293    |
| Heat shock protein family B (small) member 11                                                 | HSPB11   | 714791    |
| Heat shock transcription factor 2                                                             | HSF2     | 713938    |
| HECT domain containing E3 ubiquitin protein ligase 2                                          | HECTD2   | 697258    |
| Hematological and neurological expressed 1-like                                               | HN1L     | 702283    |
| Hematopoietic cell-specific Lyn substrate 1                                                   | HCLS1    | 714044    |
| Hematopoietic prostaglandin D synthase                                                        | HPGDS    | 705227    |
| Heme oxygenase 2                                                                              | HMOX2    | 705461    |
| Hemogen                                                                                       | HEMGN    | 715562    |

|                                                                         |         |           |
|-------------------------------------------------------------------------|---------|-----------|
| Hemoglobin subunit alpha 1                                              | HBA1    | 701930    |
| Hemoglobin subunit epsilon 1                                            | HBE1    | 715414    |
| HEN1 methyltransferase homolog 1 (Arabidopsis)                          | HENMT1  | 698896    |
| Hepcidin antimicrobial peptide                                          | HAMP    | 708397    |
| Hexamethylene bis-acetamide inducible 1                                 | HEXIM1  | 716006    |
| Histocompatibility (minor) 13                                           | HM13    | 713216    |
| Histone deacetylase 3                                                   | HDAC3   | 704467    |
| Histone deacetylase 5                                                   | HDAC5   | 711456    |
| Homeobox D12                                                            | HOXD12  | 100428778 |
| Homeodomain interacting protein kinase 1                                | HIPK1   | 707856    |
| Host cell factor C2                                                     | HCFC2   | 700316    |
| HRAS like suppressor family member 5                                    | HRASLS5 | 718317    |
| Hyaluronan and proteoglycan link protein 3                              | HAPLN3  | 698880    |
| Hydroxysteroid dehydrogenase like 2                                     | HSDL2   | 707233    |
| Hyperpolarization activated cyclic nucleotide gated potassium channel 3 | HCN3    | 717719    |
| Iduronidase, alpha-L-                                                   | IDUA    | 106998222 |
| IKAROS family zinc finger 3                                             | IKZF3   | 698083    |
| IMP (inosine 5'-monophosphate) dehydrogenase 2                          | IMPDH2  | 708307    |
| IMP3, U3 small nucleolar ribonucleoprotein                              | IMP3    | 706202    |
| Importin 5                                                              | IPO5    | 697448    |
| Importin 9                                                              | IPO9    | 707210    |
| Inhibin alpha                                                           | INHA    | 574379    |
| Inositol-3-phosphate synthase 1                                         | ISYNA1  | 719487    |
| Insulin like 3                                                          | INSL3   | 100533194 |
| Insulin like 6                                                          | INSL6   | 693735    |
| Insulin like growth factor binding protein 4                            | IGFBP4  | 700963    |
| Integrator complex subunit 5                                            | INTS5   | 719124    |
| Integrator complex subunit 7                                            | INTS7   | 711152    |
| Integrin linked kinase                                                  | ILK     | 709944    |
| Integrin subunit alpha 2b                                               | ITGA2B  | 714955    |
| Integrin subunit alpha V                                                | ITGAV   | 707756    |
| Integrin subunit beta like 1                                            | ITGBL1  | 700965    |
| Integrin-binding sialoprotein                                           | IBSP    | 701835    |
| Intercellular adhesion molecule 4 (Landsteiner-Wiener blood group)      | ICAM4   | 712354    |
| Interferon regulatory factor 2                                          | IRF2    | 694347    |
| Interferon regulatory factor 2 binding protein 1                        | IRF2BP1 | 715611    |
| Interferon, alpha 2                                                     | IFNA2   | 709948    |
| Interferon, gamma-inducible protein 16                                  | IFI16   | 719253    |
| Interleukin 21 receptor                                                 | IL21R   | 705759    |
| Interleukin 22                                                          | IL22    | 718047    |
| Intraflagellar transport 172                                            | IFT172  | 700948    |
| Intraflagellar transport 20                                             | IFT20   | 715773    |
| Intraflagellar transport 57                                             | IFT57   | 705088    |
| Inturned planar cell polarity protein                                   | INTU    | 709967    |
| IQ motif containing K                                                   | IQCK    | 695417    |
| IQ motif containing with AAA domain 1                                   | IQCA1   | 694173    |
| Isocitrate dehydrogenase 3 (NAD+) gamma                                 | IDH3G   | 698558    |

|                                                                                             |           |           |
|---------------------------------------------------------------------------------------------|-----------|-----------|
| Junction adhesion molecule like                                                             | JAML      | 704919    |
| Junctophilin 1                                                                              | JPH1      | 697014    |
| KDEL endoplasmic reticulum protein retention receptor 1                                     | KDELR1    | 717928    |
| KDEL endoplasmic reticulum protein retention receptor 2                                     | KDELR2    | 704335    |
| KDEL motif containing 1                                                                     | KDELC1    | 702156    |
| Kelch domain containing 10                                                                  | KLHDC10   | 702290    |
| Kelch domain containing 8B                                                                  | KLHDC8B   | 707348    |
| Kelch like family member 11                                                                 | KLHL11    | 708393    |
| Kelch like family member 2                                                                  | KLHL2     | 704790    |
| Kelch like family member 40                                                                 | KLHL40    | 717366    |
| Kell blood group, metallo-endopeptidase                                                     | KEL       | 703492    |
| Keratin 14, type I                                                                          | KRT14     | 100426180 |
| Keratin 222, type II                                                                        | KRT222    | 701557    |
| Keratin 25, type I                                                                          | KRT25     | 701915    |
| Keratin 4, type II                                                                          | KRT4      | 700060    |
| Keratin associated protein 12-4                                                             | KRTAP12-4 | 712284    |
| Keratin associated protein 22-1                                                             | KRTAP22-1 | 100428224 |
| Keratocan                                                                                   | KERA      | 709743    |
| KIAA0141 ortholog                                                                           | KIAA0141  | 702802    |
| KIAA0355 ortholog                                                                           | KIAA0355  | 705202    |
| Kv channel interacting protein 2                                                            | KCNIP2    | 712434    |
| Laminin subunit beta 2                                                                      | LAMB2     | 707892    |
| Late cornified envelope 3C                                                                  | LCE3C     | 100423543 |
| Late cornified envelope 5A                                                                  | LCE5A     | 100423330 |
| LCK proto-oncogene, Src family tyrosine kinase                                              | LCK       | 717704    |
| LDL receptor related protein 2                                                              | LRP2      | 705786    |
| LETM1 domain containing 1                                                                   | LETMD1    | 694422    |
| Leucine rich repeat and coiled-coil centrosomal protein 1                                   | LRRCC1    | 707964    |
| Leucine rich repeat and fibronectin type III domain containing 4                            | LRFN4     | 713166    |
| Leucine rich repeat and fibronectin type III domain containing 5                            | LRFN5     | 700512    |
| Leucine rich repeat containing 36                                                           | LRRC36    | 697849    |
| Leucine rich repeat containing 42                                                           | LRRC42    | 714839    |
| Leucine rich repeat containing 61                                                           | LRRC61    | 704779    |
| Leucine rich repeat transmembrane neuronal 3                                                | LRRTM3    | 696536    |
| Leucine-rich repeats and immunoglobulin-like domains 3                                      | LRIG3     | 716344    |
| Leucine-rich repeats and WD repeat domain containing 1                                      | LRWD1     | 715187    |
| Leukocyte immunoglobulin-like receptor, subfamily B<br>(with TM and ITIM domains), member 1 | LILRB1    | 692340    |
| Leukocyte receptor cluster (LRC) member 1                                                   | LENG1     | 693417    |
| Leukocyte-associated immunoglobulin-like receptor 1                                         | LAIR1     | 695533    |
| Leupaxin                                                                                    | LPXN      | 702033    |
| Ligase IV, DNA, ATP-dependent                                                               | LIG4      | 695475    |
| LIM domain binding 2                                                                        | LDB2      | 714918    |
| Limb development membrane protein 1-like                                                    | LMBR1L    | 709548    |
| Lin-28 homolog B (C. Elegans)                                                               | LIN28B    | 696130    |
| Lin-28 homolog B (C. Elegans)                                                               | LIN28B    | 696130    |
| Lipocalin 1                                                                                 | LCN1      | 711974    |
| Lipopolysaccharide-induced TNF factor                                                       | LITAF     | 711743    |

|                                                                                  |          |           |
|----------------------------------------------------------------------------------|----------|-----------|
| Low density lipoprotein receptor adaptor protein 1                               | LDLRAP1  | 713032    |
| LSM12 homolog                                                                    | LSM12    | 714219    |
| LSM14A mrna processing body assembly factor                                      | LSM14A   | 705085    |
| Ly6/neurotoxin 1                                                                 | LYNX1    | 100428508 |
| Lymphocyte antigen 6 complex, locus G6C                                          | LY6G6C   | 716220    |
| Lysine-rich nucleolar protein 1                                                  | KNOP1    | 695144    |
| Lysophosphatidylcholine acyltransferase 4                                        | LPCAT4   | 696388    |
| Lysophospholipase II                                                             | LYPLA2   | 719074    |
| Lysozyme-like 4                                                                  | LYZL4    | 716549    |
| Lysyl oxidase like 1                                                             | LOXL1    | 706464    |
| MAD2 mitotic arrest deficient-like 2 (yeast)                                     | MAD2L2   | 714527    |
| MAD2L1 binding protein                                                           | MAD2L1BP | 701099    |
| MAF1 homolog, negative regulator of RNA polymerase III                           | MAF1     | 700385    |
| MAGE family member D2                                                            | MAGED2   | 701719    |
| Mago homolog, exon junction complex core component                               | MAGOH    | 714261    |
| Major facilitator superfamily domain containing 14B                              | MFSD14B  | 708498    |
| Major histocompatibility complex, class I, A                                     | MAMU-A3  | 699243    |
| Major histocompatibility complex, class I, E                                     | MAMU-E   | 711532    |
| Male-enhanced antigen 1                                                          | MEA1     | 699300    |
| Mannose receptor, C type 1                                                       | MRC1     | 701010    |
| Mannosidase, alpha, class 1B, member 1                                           | MAN1B1   | 706918    |
| Mannosidase, alpha, class 2B, member 1                                           | MAN2B1   | 716173    |
| Mannosidase, beta A, lysosomal                                                   | MANBA    | 712531    |
| Mannosyl (alpha-1,3-)-glycoprotein beta-1,2-<br>N-acetylglucosaminyltransferase  | MGAT1    | 707375    |
| Mannosyl (alpha-1,6-)-glycoprotein beta-1,6-<br>N-acetyl-glucosaminyltransferase | MGAT5    | 709108    |
| MAP7 domain containing 1                                                         | MAP7D1   | 712899    |
| MAP-kinase activating death domain                                               | MADD     | 713613    |
| MAS-related GPR, member X4                                                       | MRGPRX4  | 692123    |
| Matrin 3                                                                         | MATR3    | 100568450 |
| MDM2 binding protein                                                             | MTBP     | 703121    |
| Mediator complex subunit 6                                                       | MED6     | 693320    |
| Meiosis 1 associated protein                                                     | M1AP     | 710210    |
| Melatonin receptor 1A                                                            | MTNR1A   | 702686    |
| Melatonin receptor 1B                                                            | MTNR1B   | 695629    |
| Meprin A subunit beta                                                            | MEP1B    | 707036    |
| Metallothionein 3                                                                | MT3      | 700602    |
| Metaxin 1                                                                        | MTX1     | 717595    |
| Methionine sulfoxide reductase B3                                                | MSRB3    | 717617    |
| Microtubule associated protein 1 light chain 3 alpha                             | MAP1LC3A | 707439    |
| Microtubule associated protein 1S                                                | MAP1S    | 719196    |
| Microtubule associated protein 2                                                 | MAP2     | 710840    |
| Midline 1                                                                        | MID1     | 709683    |
| Midnolin                                                                         | MIDN     | 721215    |
| Mitochondrial E3 ubiquitin protein ligase 1                                      | MUL1     | 705429    |
| Mitochondrial elongation factor 2                                                | MIEF2    | 700705    |
| Mitochondrial ribosomal protein L11                                              | MRPL11   | 714094    |

|                                                                                                   |         |           |
|---------------------------------------------------------------------------------------------------|---------|-----------|
| Mitochondrial ribosomal protein L18                                                               | MRPL18  | 702629    |
| Mitochondrial ribosomal protein L36                                                               | MRPL36  | 100430880 |
| Mitochondrial ribosomal protein L37                                                               | MRPL37  | 715168    |
| Mitochondrial ribosomal protein L42                                                               | MRPL42  | 715676    |
| Mitochondrial ribosomal protein L43                                                               | MRPL43  | 711038    |
| Mitochondrial ribosomal protein L9                                                                | MRPL9   | 711235    |
| Mitochondrial ribosomal protein S18C                                                              | MRPS18C | 707257    |
| Mitochondrial ribosomal protein S21                                                               | MRPS21  | 706805    |
| Mitochondrial ribosomal protein S9                                                                | MRPS9   | 712968    |
| Mitogen-activated protein kinase 11                                                               | MAPK11  | 715794    |
| Mitogen-activated protein kinase 12                                                               | MAPK12  | 715745    |
| Mitogen-activated protein kinase kinase kinase 6                                                  | MAP3K6  | 715911    |
| Mitogen-activated protein kinase kinase kinase kinase 2                                           | MAP4K2  | 699331    |
| Molybdenum cofactor synthesis 2                                                                   | MOCS2   | 703689    |
| Monoacylglycerol O-acyltransferase 2                                                              | MOGAT2  | 696347    |
| Mov10 RISC complex RNA helicase                                                                   | MOV10   | 705910    |
| Msh homeobox 2                                                                                    | MSX2    | 694227    |
| Multiple C2 domains, transmembrane 2                                                              | MCTP2   | 706949    |
| Murine retrovirus integration site 1 homolog                                                      | MRVI1   | 702830    |
| Muscle, skeletal, receptor tyrosine kinase                                                        | MUSK    | 709397    |
| MYCBP-associated, testis expressed 1                                                              | MAATS1  | 712979    |
| Myelin regulatory factor                                                                          | MYRF    | 719083    |
| Myeloid/lymphoid or mixed-lineage leukemia; translocated to, 6                                    | MLLT6   | 694045    |
| Myosin XVIII A                                                                                    | MYO18A  | 711171    |
| Myotubularin 1                                                                                    | MTM1    | 703131    |
| Myotubularin related protein 2                                                                    | MTMR2   | 699703    |
| N-6 adenine-specific DNA methyltransferase 2 (putative)                                           | N6AMT2  | 703665    |
| N-acetyltransferase 8-like (GCN5-related, putative)                                               | NAT8L   | 722359    |
| NAD(P)H dehydrogenase, quinone 2                                                                  | NQO2    | 707675    |
| NADH:ubiquinone oxidoreductase complex assembly factor 4                                          | NDUFAF4 | 705102    |
| NADH:ubiquinone oxidoreductase subunit A12                                                        | NDUFA12 | 711970    |
| NADPH oxidase organizer 1                                                                         | NOXO1   | 694059    |
| Natriuretic peptide receptor 2                                                                    | NPR2    | 695750    |
| Nedd4 family interacting protein 1                                                                | NDFIP1  | 705716    |
| Negative elongation factor complex member E                                                       | NELFE   | 716913    |
| Neural precursor cell expressed,<br>developmentally down-regulated 1                              | NEDD1   | 713673    |
| Neural precursor cell expressed,<br>developmentally down-regulated 4, E3 ubiquitin protein ligase | NEDD4   | 699550    |
| Neural proliferation, differentiation and control, 1                                              | NPDC1   | 707453    |
| Neuritin 1                                                                                        | NRN1    | 722968    |
| Neuroglobin                                                                                       | NGB     | 641331    |
| Neuronal differentiation 1                                                                        | NEUROD1 | 704954    |
| Neuronal PAS domain protein 2                                                                     | NPAS2   | 710480    |
| Neuronal PAS domain protein 4                                                                     | NPAS4   | 714161    |
| Neuropilin and tolloid like 1                                                                     | NETO1   | 694322    |
| Neutrophil cytosolic factor 4                                                                     | NCF4    | 695612    |
| N-glycanase 1                                                                                     | NGLY1   | 700842    |



|                                                                      |        |           |
|----------------------------------------------------------------------|--------|-----------|
| Nicotinamide nucleotide transhydrogenase                             | NNT    | 701110    |
| NK2 homeobox 5                                                       | NKX2-5 | 703795    |
| NKG2D protein                                                        | NKG2D  | 574240    |
| NLR family, pyrin domain containing 1                                | NLRP1  | 721648    |
| NLR family, pyrin domain containing 10                               | NLRP10 | 709794    |
| NLR family, pyrin domain containing 4                                | NLRP4  | 703431    |
| NLR family, pyrin domain containing 9                                | NLRP9  | 719115    |
| N-myristoyltransferase 1                                             | NMT1   | 715885    |
| NOC2-like nucleolar associated transcriptional repressor             | NOC2L  | 697809    |
| Non-SMC condensin I complex subunit D2                               | NCAPD2 | 712834    |
| Non-SMC condensin I complex subunit G                                | NCAPG  | 715235    |
| N-terminal Xaa-Pro-Lys N-methyltransferase 1                         | NTMT1  | 716763    |
| Nuclear casein kinase and cyclin-dependent kinase substrate 1        | NUCKS1 | 697298    |
| Nuclear factor of kappa light polypeptide gene enhancer in B-cells 1 | NFKB1  | 710324    |
| Nuclear pore associated protein 1                                    | NPAP1  | 719891    |
| Nuclear receptor binding SET domain protein 1                        | NSD1   | 706131    |
| Nuclear receptor subfamily 1 group I member 2                        | NR1I2  | 574226    |
| Nuclear transcription factor Y subunit alpha                         | NFYA   | 719697    |
| Nucleoporin 50kda                                                    | NUP50  | 713282    |
| Nude neurodevelopment protein 1-like 1                               | NDEL1  | 721973    |
| Nudix hydrolase 1                                                    | NUDT1  | 713078    |
| Olfactory receptor, family 1, subfamily Q, member 1                  | OR1Q1  | 697695    |
| Olfactory receptor, family 10, subfamily A, member 4                 | OR10A4 | 100423176 |
| Olfactory receptor, family 2, subfamily AG, member 2                 | OR2AG2 | 709556    |
| Olfactory receptor, family 2, subfamily F, member 1                  | OR2F1  | 707900    |
| Olfactory receptor, family 2, subfamily H, member 2                  | OR2H2  | 710946    |
| Olfactory receptor, family 2, subfamily W, member 1                  | OR2W1  | 708515    |
| Olfactory receptor, family 4, subfamily E, member 2                  | OR4E2  | 708887    |
| Olfactory receptor, family 4, subfamily N, member 2                  | OR4N2  | 701881    |
| Olfactory receptor, family 5, subfamily L, member 1                  | OR5L1  | 719174    |
| Olfactory receptor, family 5, subfamily M, member 9                  | OR5M9  | 705878    |
| Olfactory receptor, family 52, subfamily N, member 4                 | OR52N4 | 696970    |
| Olfactory receptor, family 7, subfamily D, member 4                  | OR7D4  | 721322    |
| Oncomodulin 2                                                        | OCM2   | 721827    |
| Origin recognition complex subunit 5                                 | ORC5   | 696683    |
| ORMDL sphingolipid biosynthesis regulator 2                          | ORMDL2 | 710296    |
| Ornithine decarboxylase antizyme 2                                   | OAZ2   | 707593    |
| Osteosarcoma amplified 9, endoplasmic reticulum lectin               | OS9    | 715555    |
| Outer dense fiber of sperm tails 1                                   | ODF1   | 707269    |
| Outer dense fiber of sperm tails 3                                   | ODF3   | 696480    |
| Outer dense fiber of sperm tails 3-like 1                            | ODF3L1 | 706545    |
| Oviductal glycoprotein 1                                             | OVGP1  | 703848    |
| Oxysterol binding protein like 5                                     | OSBPL5 | 706613    |
| P21 protein (Cdc42/Rac)-activated kinase 1                           | PAK1   | 698585    |
| P450 (cytochrome) oxidoreductase                                     | POR    | 715888    |
| P53 and DNA damage regulated 1                                       | PDRG1  | 712622    |
| Paired box 9                                                         | PAX9   | 100429091 |
| Pancreatic and duodenal homeobox 1                                   | PDX1   | 710936    |

|                                                              |          |           |
|--------------------------------------------------------------|----------|-----------|
| Pancreatic polypeptide                                       | PPY      | 713988    |
| PAP associated domain containing 7                           | PAPD7    | 713853    |
| Par-3 family cell polarity regulator                         | PARD3    | 706472    |
| Paralemmin 2                                                 | PALM2    | 100532751 |
| PCI domain containing 2                                      | PCID2    | 714247    |
| PDLIM1 interacting kinase 1 like                             | PDIK1L   | 719774    |
| PDZ and LIM domain 1                                         | PDLIM1   | 702998    |
| PDZ domain containing 4                                      | PDZD4    | 697387    |
| Peptidyl arginine deiminase, type III                        | PADI3    | 700560    |
| Peptidylprolyl isomerase B (cyclophilin B)                   | PPIB     | 706757    |
| Peroxiredoxin 2                                              | PRDX2    | 716665    |
| Peroxisomal biogenesis factor 16                             | PEX16    | 714904    |
| PHD finger protein 1                                         | PHF1     | 718337    |
| PHD finger protein 14                                        | PHF14    | 694855    |
| Phenylalanine hydroxylase                                    | PAH      | 698696    |
| Phosphatase and actin regulator 1                            | PHACTR1  | 700226    |
| Phosphatase, orphan 1                                        | PHOSPHO1 | 698959    |
| Phosphatase, orphan 2                                        | PHOSPHO2 | 100429653 |
| Phosphate cytidylyltransferase 1, choline, alpha             | PCYT1A   | 722105    |
| Phosphatidylinositol 4-kinase, catalytic, beta               | PI4KB    | 710104    |
| Phosphatidylinositol glycan anchor biosynthesis class H      | PIGH     | 710780    |
| Phosphatidylinositol glycan anchor biosynthesis class S      | PIGS     | 709115    |
| Phosphatidylinositol transfer protein alpha                  | PITPNA   | 721228    |
| Phosphodiesterase 6D                                         | PDE6D    | 712629    |
| Phosphodiesterase 9A                                         | PDE9A    | 100301991 |
| Phospholipase A2 group IB                                    | PLA2G1B  | 696712    |
| Phospholipase A2 group XIIB                                  | PLA2G12B | 708031    |
| Phospholipase A2 group XV                                    | PLA2G15  | 702619    |
| Phospholipase B domain containing 1                          | PLBD1    | 698939    |
| Phospholipase B domain containing 2                          | PLBD2    | 714669    |
| Phospholipase C beta 2                                       | PLCB2    | 701951    |
| Phospholipase D family member 3                              | PLD3     | 701083    |
| Phospholipid scramblase 3                                    | PLSCR3   | 721831    |
| Phosphoribosyl pyrophosphate synthetase 1-like 1             | PRPS1L1  | 708413    |
| Pituitary tumor-transforming 1 interacting protein           | PTTG1IP  | 722061    |
| Placental growth factor                                      | PGF      | 701219    |
| Placenta-specific 1-like                                     | PLAC1L   | 698074    |
| Platelet-derived growth factor beta polypeptide              | PDGFB    | 703173    |
| Pleckstrin homology domain containing A8                     | PLEKHA8  | 696127    |
| Pleckstrin homology domain containing O1                     | PLEKHO1  | 706145    |
| Poliovirus receptor-related 2 (herpesvirus entry mediator B) | PVRL2    | 713229    |
| Poly(A) binding protein, cytoplasmic 1                       | PABPC1   | 705847    |
| Poly(ADP-ribose) glycohydrolase                              | PARG     | 709432    |
| Poly(ADP-ribose) polymerase family member 10                 | PARP10   | 708132    |
| Poly(rc) binding protein 2                                   | PCBP2    | 703175    |
| Polybromo 1                                                  | PBRM1    | 696361    |
| Polycomb group ring finger 2                                 | PCGF2    | 694187    |
| Polyglutamine binding protein 1                              | PQBP1    | 711678    |

|                                                                       |          |           |
|-----------------------------------------------------------------------|----------|-----------|
| Polyhomeotic homolog 2 (Drosophila)                                   | PHC2     | 710201    |
| Polymerase (DNA directed), epsilon 3, accessory subunit               | POLE3    | 705074    |
| Polymerase (RNA) II (DNA directed) polypeptide I, 14.5kda             | POLR2I   | 712412    |
| Polymerase (RNA) III (DNA directed) polypeptide H (22.9kd)            | POLR3H   | 707546    |
| Polymerase (RNA) mitochondrial (DNA directed)                         | POLRMT   | 100426183 |
| Polynucleotide kinase 3'-phosphatase                                  | PNKP     | 719084    |
| Potassium channel tetramerization domain containing 10                | KCTD10   | 707443    |
| Potassium channel tetramerization domain containing 3                 | KCTD3    | 708471    |
| Potassium channel tetramerization domain containing 9                 | KCTD9    | 711515    |
| Potassium channel, two pore domain subfamily K, member 16             | KCNK16   | 719585    |
| Potassium channel, voltage gated modifier subfamily V, member 1       | KCNV1    | 699636    |
| Potassium channel, voltage gated shaker related subfamily A, member 5 | KCNA5    | 711886    |
| Potassium channel, voltage gated Shaw related subfamily C, member 2   | KCNC2    | 100430906 |
| Potassium voltage-gated channel, modifier subfamily S, member 1       | KCNS1    | 711715    |
| PR domain containing 14                                               | PRDM14   | 693324    |
| PR domain containing 2, with ZNF domain                               | PRDM2    | 716295    |
| Pre-B-cell leukemia homeobox 1                                        | PBX1     | 694416    |
| PRELI domain containing 1                                             | PRELID1  | 699254    |
| Pre-mrna processing factor 3                                          | PRPF3    | 706898    |
| Presenilin enhancer gamma secretase subunit                           | PSENEN   | 100429005 |
| Progesterone and adiponectin receptor family member VIII              | PAQR8    | 708418    |
| Prolactin regulatory element binding                                  | PREB     | 700408    |
| Proline rich 3                                                        | PRR3     | 711699    |
| Proline rich membrane anchor 1                                        | PRIMA1   | 100426274 |
| Proline, glutamate and leucine rich protein 1                         | PELP1    | 677854    |
| Proline-rich coiled-coil 2A                                           | PRRC2A   | 715715    |
| Prominin 1                                                            | PROM1    | 714610    |
| Promyelocytic leukemia                                                | PML      | 700379    |
| Proprotein convertase subtilisin/kexin type 7                         | PCSK7    | 697567    |
| Prosaposin                                                            | PSAP     | 709510    |
| Prostaglandin E synthase 3                                            | PTGES3   | 713353    |
| Protease, serine 37                                                   | PRSS37   | 694908    |
| Proteasomal ATPase associated factor 1                                | PAAF1    | 718755    |
| Proteasome subunit alpha 4                                            | PSMA4    | 710417    |
| Proteasome subunit beta 2                                             | PSMB2    | 712193    |
| Protein inhibitor of activated STAT 2                                 | PIAS2    | 696737    |
| Protein kinase C and casein kinase substrate in neurons 1             | PACSIN1  | 718624    |
| Protein kinase C, alpha                                               | PRKCA    | 718412    |
| Protein phosphatase 1 regulatory subunit 12B                          | PPP1R12B | 705775    |
| Protein phosphatase 1 regulatory subunit 15A                          | PPP1R15A | 718350    |
| Protein phosphatase 1 regulatory subunit 16B                          | PPP1R16B | 693349    |
| Protein phosphatase 3, catalytic subunit, beta isozyme                | PPP3CB   | 706955    |
| Protein phosphatase 3, catalytic subunit, gamma isozyme               | PPP3CC   | 708233    |
| Protein phosphatase 4 catalytic subunit                               | PPP4C    | 708510    |
| Protein S (alpha)                                                     | PROS1    | 694845    |
| Protein serine kinase H2                                              | PSKH2    | 693701    |

|                                                                                            |          |           |
|--------------------------------------------------------------------------------------------|----------|-----------|
| Protein tyrosine phosphatase domain containing 1                                           | PTPDC1   | 707878    |
| Protein tyrosine phosphatase type IVA, member 2                                            | PTP4A2   | 706489    |
| Protein tyrosine phosphatase, non-receptor type 20                                         | PTPN20   | 711276    |
| Protein tyrosine phosphatase, non-receptor type 23                                         | PTPN23   | 711601    |
| Protocadherin beta 4                                                                       | PCDHB4   | 700373    |
| Purinergic receptor P2Y, G-protein coupled, 11                                             | P2RY11   | 100533473 |
| PYD and CARD domain containing                                                             | PYCARD   | 713563    |
| PYM homolog 1, exon junction complex associated factor                                     | PYM1     | 708148    |
| Pyridine nucleotide-disulphide oxidoreductase domain 2                                     | PYROXD2  | 707797    |
| Pyruvate dehydrogenase kinase, isozyme 2                                                   | PDK2     | 704169    |
| Pyruvate dehydrogenase phosphatase regulatory subunit                                      | PDPR     | 709861    |
| Quiescin sulfhydryl oxidase 1                                                              | QSOX1    | 718589    |
| RAB, member of RAS oncogene family-like 2B                                                 | RABL2B   | 716615    |
| RAB5B, member RAS oncogene family                                                          | RAB5B    | 708347    |
| RAB6A, member RAS oncogene family                                                          | RAB6A    | 718717    |
| RAB8B, member RAS oncogene family                                                          | RAB8B    | 705597    |
| RAD9 checkpoint clamp component A                                                          | RAD9A    | 712345    |
| Ral gtpase activating protein, alpha subunit 1 (catalytic)                                 | RALGAPA1 | 695674    |
| Ral gtpase activating protein, beta subunit (non-catalytic)                                | RALGAPB  | 705742    |
| Ral guanine nucleotide dissociation stimulator-like 1                                      | RGL1     | 717554    |
| RALY heterogeneous nuclear ribonucleoprotein                                               | RALY     | 713317    |
| RAN binding protein 10                                                                     | RANBP10  | 700911    |
| Ran gtpase activating protein 1                                                            | RANGAP1  | 710698    |
| Ranbp-type and C3HC4-type zinc finger containing 1                                         | RBCK1    | 714692    |
| Rap guanine nucleotide exchange factor 2                                                   | RAPGEF2  | 704717    |
| Ras and Rab interactor 3                                                                   | RIN3     | 698125    |
| Ras homolog family member A                                                                | RHOA     | 706455    |
| Ras homolog family member C                                                                | RHOC     | 706034    |
| Ras homolog family member J                                                                | RHOJ     | 705603    |
| Ras-related C3 botulinum toxin substrate 2<br>(rho family, small GTP binding protein Rac2) | RAC2     | 696709    |
| Ras-related GTP binding A                                                                  | RRAGA    | 100430225 |
| RBPJ interacting and tubulin associated 1                                                  | RITA1    | 712837    |
| Receptor (chemosensory) transporter protein 3                                              | RTP3     | 713050    |
| Receptor interacting serine/threonine kinase 3                                             | RIPK3    | 716138    |
| Receptor tyrosine kinase-like orphan receptor 2                                            | ROR2     | 715482    |
| Recq helicase-like                                                                         | RECQL    | 705871    |
| Regulator of G-protein signaling 10                                                        | RGS10    | 703125    |
| Regulatory factor X associated ankyrin containing protein                                  | RFXANK   | 719706    |
| Relaxin/insulin-like family peptide receptor 4                                             | RXFP4    | 718025    |
| Replication protein A1                                                                     | RPA1     | 721272    |
| Replication protein A3                                                                     | RPA3     | 696248    |
| Resistin                                                                                   | RETN     | 708781    |
| Ret proto-oncogene                                                                         | RET      | 703466    |
| Retinoic acid induced 14                                                                   | RAI14    | 698620    |
| Retinol dehydrogenase 5 (11-cis/9-cis)                                                     | RDH5     | 709644    |
| RFT1 homolog                                                                               | RFT1     | 694586    |
| Rh family, C glycoprotein                                                                  | RHCG     | 664731    |

|                                                                |          |           |
|----------------------------------------------------------------|----------|-----------|
| Rho GDP dissociation inhibitor (GDI) beta                      | ARHGDIB  | 702320    |
| Rho gtpase activating protein 30                               | ARHGAP30 | 718236    |
| Rho gtpase activating protein 9                                | ARHGAP9  | 711684    |
| Rho guanine nucleotide exchange factor 1                       | ARHGEF1  | 722198    |
| Rho/Rac guanine nucleotide exchange factor 2                   | ARHGEF2  | 719369    |
| Ribonuclease H2 subunit B                                      | RNASEH2B | 707995    |
| Ribonuclease P/MRP 21kda subunit                               | RPP21    | 713056    |
| Ribonuclease T2                                                | RNASET2  | 706533    |
| Ribonuclease, rnase A family, 9 (non-active)                   | RNASE9   | 703346    |
| Ribonucleoprotein, PTB-binding 1                               | RAVER1   | 715250    |
| Ribophorin II                                                  | RPN2     | 708971    |
| Ribosomal modification protein rimk-like family member A       | RIMKLA   | 699767    |
| Ribosomal protein l10a                                         | RPL10A   | 718783    |
| Ribosomal protein L17                                          | RPL17    | 698967    |
| Ribosomal protein L23                                          | RPL23    | 694719    |
| Ribosomal protein l23a                                         | RPL23A   | 710490    |
| Ribosomal protein L24                                          | RPL24    | 702381    |
| Ribosomal protein L29                                          | RPL29    | 698602    |
| Ribosomal protein L3 like                                      | RPL3L    | 693424    |
| Ribosomal protein L4                                           | RPL4     | 710590    |
| Ribosomal protein l7a                                          | RPL7A    | 722215    |
| Ribosomal protein L8                                           | RPL8     | 708535    |
| Ribosomal protein S10                                          | RPS10    | 718606    |
| Ribosomal protein S13                                          | RPS13    | 697513    |
| Ribosomal protein S14                                          | RPS14    | 710901    |
| Ribosomal protein S15                                          | RPS15    | 707241    |
| Ribosomal protein S16                                          | RPS16    | 697219    |
| Ribosomal protein S2                                           | RPS2     | 693615    |
| Ribosomal protein S27                                          | RPS27    | 100430474 |
| Ribosomal protein S28                                          | RPS28    | 707133    |
| Ribosomal protein S4, X-linked                                 | RPS4X    | 699397    |
| Ribosomal protein S5                                           | RPS5     | 711259    |
| Ribosomal protein S6 kinase, 90kda, polypeptide 4              | RPS6KA4  | 717574    |
| Ribosomal protein S7                                           | RPS7     | 721900    |
| Ribosomal protein S8                                           | RPS8     | 703957    |
| Ribosomal protein S9                                           | RPS9     | 694053    |
| Ribosomal protein, large, P0                                   | RPLP0    | 574363    |
| Ribosomal protein, large, P1                                   | RPLP1    | 695442    |
| Ribosomal protein, large, P2                                   | RPLP2    | 700698    |
| Ribosomal RNA processing 8, methyltransferase, homolog (yeast) | RRP8     | 712011    |
| Ring finger protein 208                                        | RNF208   | 705563    |
| Ring finger protein 26                                         | RNF26    | 704755    |
| Ring finger protein 38                                         | RNF38    | 693346    |
| Ring finger protein 40, E3 ubiquitin protein ligase            | RNF40    | 713148    |
| Ring finger protein, transmembrane 1                           | RNFT1    | 712052    |
| RNA binding motif protein 18                                   | RBM18    | 698457    |
| RNA binding motif protein 19                                   | RBM19    | 715724    |
| RNA binding motif protein 42                                   | RBM42    | 709852    |

|                                                                   |           |           |
|-------------------------------------------------------------------|-----------|-----------|
| RNA binding motif protein 45                                      | RBM45     | 702714    |
| RNA binding motif protein 7                                       | RBM7      | 695401    |
| RNA binding motif, single stranded interacting protein 1          | RBMS1     | 703608    |
| RNA binding motif, single stranded interacting protein 2          | RBMS2     | 713163    |
| RNA binding protein, fox-1 homolog (C. Elegans) 2                 | RBFOX2    | 693642    |
| RNA pseudouridylate synthase domain containing 3                  | RPUSD3    | 700349    |
| RPTOR independent companion of MTOR, complex 2                    | RICTOR    | 694915    |
| SAMM50 sorting and assembly machinery component                   | SAMM50    | 715675    |
| Sarcoglycan zeta                                                  | SGCZ      | 106992521 |
| Schlafen like 1                                                   | SLFNL1    | 695605    |
| SEC11 homolog A, signal peptidase complex subunit                 | SEC11A    | 695951    |
| Sec23 homolog A, COPII coat complex component                     | SEC23A    | 698500    |
| SEC31 homolog A, COPII coat complex component                     | SEC31A    | 693687    |
| Sec61 translocon alpha 2 subunit                                  | SEC61A2   | 100427731 |
| SECIS binding protein 2-like                                      | SECISBP2L | 714764    |
| Secretory carrier membrane protein 2                              | SCAMP2    | 709720    |
| Selenoprotein M                                                   | SELM      | 718290    |
| Sepiapterin reductase (7,8-dihydrobiopterin:NADP+ oxidoreductase) | SPR       | 705317    |
| Serine/threonine kinase 11 interacting protein                    | STK11IP   | 704531    |
| Serine/threonine kinase 31                                        | STK31     | 703886    |
| Serine/threonine kinase 38                                        | STK38     | 719169    |
| Serologically defined colon cancer antigen 3                      | SDCCAG3   | 721750    |
| Serin peptidase inhibitor, clade B (ovalbumin), member 7          | SERPINB7  | 701671    |
| Serrate, RNA effector molecule                                    | SRRT      | 713235    |
| SFI1 centrin binding protein                                      | SFI1      | 716833    |
| SH2 domain containing 3C                                          | SH2D3C    | 699706    |
| SH3 and cysteine rich domain                                      | STAC      | 707350    |
| SHANK associated RH domain interactor                             | SHARPIN   | 713534    |
| Siah E3 ubiquitin protein ligase 1                                | SIAH1     | 716629    |
| Signal peptide, CUB domain, EGF-like 2                            | SCUBE2    | 708152    |
| Signal recognition particle 68kda                                 | SRP68     | 705568    |
| Signal sequence receptor, delta                                   | SSR4      | 697266    |
| Signal transducer and activator of transcription 4                | STAT4     | 693854    |
| Signal transducer and activator of transcription 5A               | STAT5A    | 574129    |
| Sin3A associated protein 25kda                                    | SAP25     | 106997575 |
| Single stranded DNA binding protein 4                             | SSBP4     | 719496    |
| SKI-like proto-oncogene                                           | SKIL      | 696680    |
| SLIT and NTRK like family member 1                                | SLITRK1   | 699217    |
| SLX1 homolog A, structure-specific endonuclease subunit           | SLX1A     | 709225    |
| Small integral membrane protein 13                                | SMIM13    | 703387    |
| Small integral membrane protein 19                                | SMIM19    | 705371    |
| Small nuclear ribonucleoprotein polypeptides B and B1             | SNRPB     | 716578    |
| Small nuclear ribonucleoprotein, U4/U6.U5 27kda subunit           | SNRNP27   | 708670    |
| Small ubiquitin-like modifier 1                                   | SUMO1     | 703644    |
| Small ubiquitin-like modifier 2                                   | SUMO2     | 705512    |
| SMYD family member 5                                              | SMYD5     | 705926    |
| SNF related kinase                                                | SNRK      | 715803    |
| Sodium channel, non voltage gated 1 beta subunit                  | SCNN1B    | 700093    |

|                                                                                   |          |           |
|-----------------------------------------------------------------------------------|----------|-----------|
| Sodium channel, voltage gated, type X alpha subunit                               | SCN10A   | 694962    |
| Solute carrier family 2 (facilitated glucose transporter), member 2               | SLC2A2   | 695538    |
| Solute carrier family 20 (phosphate transporter), member 2                        | SLC20A2  | 705242    |
| Solute carrier family 22 (organic anion/urate transporter), member 12             | SLC22A12 | 717530    |
| Solute carrier family 22 member 14                                                | SLC22A14 | 696120    |
| Solute carrier family 22 member 15                                                | SLC22A15 | 710102    |
| Solute carrier family 25 (aspartate/glutamate carrier), member 12                 | SLC25A12 | 695173    |
| Solute carrier family 25 (mitochondrial carrier; citrate transporter), member 1   | SLC25A1  | 719075    |
| Solute carrier family 25 (mitochondrial carrier; ornithine transporter) member 2  | SLC25A2  | 701587    |
| Solute carrier family 25 (mitochondrial carrier; oxoglutarate carrier), member 11 | SLC25A11 | 710569    |
| Solute carrier family 25 (mitochondrial iron transporter), member 37              | SLC25A37 | 710518    |
| Solute carrier family 25 (S-adenosylmethionine carrier), member 26                | SLC25A26 | 697960    |
| Solute carrier family 26 (anion exchanger), member 8                              | SLC26A8  | 719049    |
| Solute carrier family 30 (zinc transporter), member 8                             | SLC30A8  | 701127    |
| Solute carrier family 34 (type II sodium/phosphate cotransporter), member 2       | SLC34A2  | 694217    |
| Solute carrier family 35 (UDP-galactose transporter), member A2                   | SLC35A2  | 711587    |
| Solute carrier family 35 (UDP-glca/UDP-galnac transporter), member D1             | SLC35D1  | 700175    |
| Solute carrier family 35 member A5                                                | SLC35A5  | 708401    |
| Solute carrier family 37 (glucose-6-phosphate transporter), member 2              | SLC37A2  | 712841    |
| Solute carrier family 38 member 9                                                 | SLC38A9  | 706752    |
| Solute carrier family 39 (zinc transporter), member 3                             | SLC39A3  | 711564    |
| Solute carrier family 4 (anion exchanger), member 1 (Diego blood group)           | SLC4A1   | 100427618 |
| Solute carrier family 4 (anion exchanger), member 2                               | SLC4A2   | 713966    |
| Solute carrier family 4, sodium borate transporter, member 11                     | SLC4A11  | 718393    |
| Solute carrier family 44 member 4                                                 | SLC44A4  | 715779    |
| Solute carrier family 5 (sodium/glucose cotransporter), member 1                  | SLC5A1   | 717070    |
| Solute carrier family 5 (sodium/multivitamin and iodide cotransporter), member 6  | SLC5A6   | 699074    |
| Solute carrier family 6 (neurotransmitter transporter), member 2                  | SLC6A2   | 613238    |
| Solute carrier family 6 (neurotransmitter transporter), member 7                  | SLC6A7   | 711915    |
| Solute carrier family 7 (anionic amino acid transporter), member 13               | SLC7A13  | 693964    |
| Solute carrier family 9, subfamily A (NHE9, cation proton antiporter 9), member 9 | SLC9A9   | 713935    |
| Solute carrier organic anion transporter family member 1C1                        | SLCO1C1  | 704740    |
| Solute carrier organic anion transporter family member 2B1                        | SLCO2B1  | 694829    |
| Sonic hedgehog                                                                    | SHH      | 716553    |
| Sorbin and SH3 domain containing 3                                                | SORBS3   | 716198    |
| Sorting nexin 12                                                                  | SNX12    | 696408    |
| Sorting nexin 13                                                                  | SNX13    | 714019    |
| Sorting nexin 22                                                                  | SNX22    | 706850    |

|                                                                                              |          |           |
|----------------------------------------------------------------------------------------------|----------|-----------|
| Sorting nexin 33                                                                             | SNX33    | 706309    |
| Sorting nexin 4                                                                              | SNX4     | 716049    |
| Sp2 transcription factor                                                                     | SP2      | 694834    |
| Sp4 transcription factor                                                                     | SP4      | 712174    |
| SPARC like 1                                                                                 | SPARCL1  | 701468    |
| SPARC related modular calcium binding 1                                                      | SMOC1    | 712994    |
| Spectrin repeat containing, nuclear envelope family member 4                                 | SYNE4    | 711904    |
| Spectrin, beta, non-erythrocytic 1                                                           | SPTBN1   | 716794    |
| Spermatogenesis associated 19                                                                | SPATA19  | 693524    |
| Spermatogenesis associated 20                                                                | SPATA20  | 703313    |
| Spermatogenesis associated 25                                                                | SPATA25  | 709097    |
| Spermatogenesis associated 4                                                                 | SPATA4   | 641336    |
| Spermatogenesis associated 6                                                                 | SPATA6   | 710827    |
| Spermatogenesis associated 9                                                                 | SPATA9   | 698748    |
| Spermidine synthase                                                                          | SRM      | 714028    |
| Spermidine/spermine N1-acetyltransferase family member 2                                     | SAT2     | 716044    |
| Sphingomyelin phosphodiesterase 1                                                            | SMPD1    | 711248    |
| Sphingosine-1-phosphate receptor 4                                                           | S1PR4    | 712637    |
| Spindle and kinetochore associated complex subunit 2                                         | SKA2     | 711092    |
| SPT16 homolog, facilitates chromatin remodeling subunit                                      | SUPT16H  | 708066    |
| Src-related kinase lacking C-terminal regulatory tyrosine and N-terminal myristylation sites | SRMS     | 719587    |
| ST3 beta-galactoside alpha-2,3-sialyltransferase 4                                           | ST3GAL4  | 717792    |
| Stannin                                                                                      | SNN      | 711909    |
| Star related lipid transfer domain containing 13                                             | STARD13  | 714104    |
| Star related lipid transfer domain containing 3                                              | STARD3   | 697212    |
| Star related lipid transfer domain containing 5                                              | STARD5   | 713308    |
| Sterile alpha motif domain containing 4A                                                     | SAMD4A   | 695336    |
| Steroid receptor RNA activator 1                                                             | SRA1     | 698169    |
| Stomatin like 2                                                                              | STOML2   | 698458    |
| Storkhead box 2                                                                              | STOX2    | 693692    |
| Stress induced phosphoprotein 1                                                              | STIP1    | 717926    |
| Striatin                                                                                     | STRN     | 708491    |
| Sulfiredoxin 1                                                                               | SRXN1    | 714997    |
| SUMO1/sentrin specific peptidase 5                                                           | SENP5    | 710223    |
| Suppression of tumorigenicity 13 (colon carcinoma) (Hsp70 interacting protein)               | ST13     | 705664    |
| SURP and G-patch domain containing 1                                                         | SUGP1    | 719772    |
| Sushi domain containing 6                                                                    | SUSD6    | 712719    |
| SWAP switching B-cell complex 70kda subunit                                                  | SWAP70   | 703651    |
| Synapsin III                                                                                 | SYN3     | 100430213 |
| Synaptotagmin 6                                                                              | SYT6     | 708175    |
| Synaptotagmin like 4                                                                         | SYTL4    | 700889    |
| Synergin, gamma                                                                              | SYNRG    | 717750    |
| Synovial sarcoma translocation gene on chromosome 18-like 2                                  | SS18L2   | 716387    |
| Syntrophin, gamma 1                                                                          | SNTG1    | 709244    |
| Tankyrase 1 binding protein 1                                                                | TNKS1BP1 | 704825    |
| TAO kinase 2                                                                                 | TAOK2    | 707777    |



|                                                                    |          |        |
|--------------------------------------------------------------------|----------|--------|
| TATA-box binding protein associated factor 2                       | TAF2     | 702411 |
| TATA-box binding protein associated factor 5                       | TAF5     | 714558 |
| Tax1 (human T-cell leukemia virus type I) binding protein 3        | TAX1BP3  | 706829 |
| TBK1 binding protein 1                                             | TBKBP1   | 693913 |
| T-box 21                                                           | TBX21    | 694044 |
| TCF3 (E2A) fusion partner (in childhood Leukemia)                  | TFPT     | 720296 |
| Teashirt zinc finger homeobox 1                                    | TSHZ1    | 703018 |
| TELO2 interacting protein 2                                        | TTI2     | 696776 |
| Telomeric repeat binding factor 2, interacting protein             | TERF2IP  | 712149 |
| Teneurin transmembrane protein 1                                   | TENM1    | 699897 |
| TERF1 (TRF1)-interacting nuclear factor 2                          | TINF2    | 715812 |
| Testis expressed 26                                                | TEX26    | 713363 |
| Testis expressed 30                                                | TEX30    | 701917 |
| Tetraspanin 18                                                     | TSPAN18  | 715506 |
| Tetraspanin 32                                                     | TSPAN32  | 704862 |
| Tetratricopeptide repeat domain 1                                  | TTC1     | 695225 |
| Tetratricopeptide repeat domain 14                                 | TTC14    | 710895 |
| Tetratricopeptide repeat domain 21A                                | TTC21A   | 694904 |
| Tetratricopeptide repeat domain 23                                 | TTC23    | 708530 |
| Tetratricopeptide repeat domain 7B                                 | TTC7B    | 696029 |
| TGF-beta activated kinase 1/MAP3K7 binding protein 1               | TAB1     | 703409 |
| THAP domain containing 7                                           | THAP7    | 696208 |
| Thioredoxin domain containing 9                                    | TXNDC9   | 709303 |
| Thioredoxin-related transmembrane protein 1                        | TMX1     | 707057 |
| THO complex 3                                                      | THOC3    | 695561 |
| THO complex 6                                                      | THOC6    | 700217 |
| Thy-1 cell surface antigen                                         | THY1     | 705321 |
| Thymidine phosphorylase                                            | TYMP     | 716161 |
| Thymosin beta 4, X-linked                                          | TMSB4X   | 710959 |
| Thyroid hormone receptor associated protein 3                      | THRAP3   | 713033 |
| TNF receptor associated factor 6                                   | TRAF6    | 716907 |
| Topoisomerase (DNA) I                                              | TOP1     | 697300 |
| Topoisomerase (DNA) III beta                                       | TOP3B    | 698317 |
| Trace amine associated receptor 6                                  | TAAR6    | 709418 |
| TRAF3 interacting protein 3                                        | TRAF3IP3 | 712895 |
| Transcription elongation factor A (SII), 2                         | TCEA2    | 694026 |
| Transcription elongation factor A (SII)-like 1                     | TCEAL1   | 696826 |
| Transcription factor 15 (basic helix-loop-helix)                   | TCF15    | 716916 |
| Transcription factor 7-like 1 (T-cell specific, HMG-box)           | TCF7L1   | 694560 |
| Transcription factor Dp family member 3                            | TFDP3    | 706557 |
| Transcription factor EC                                            | TFEC     | 704124 |
| Transcriptional adaptor 3                                          | TADA3    | 700090 |
| Transducin (beta)-like 1 X-linked receptor 1                       | TBL1XR1  | 712740 |
| Transducin like enhancer of split 3                                | TLE3     | 698046 |
| Transforming growth factor beta 1 induced transcript 1             | TGFB1I1  | 714172 |
| Transforming, acidic coiled-coil containing protein 3              | TACC3    | 712898 |
| Transient receptor potential cation channel, subfamily C, member 7 | TRPC7    | 712863 |
| Transketolase-like 1                                               | TKTL1    | 699278 |

|                                                                   |           |           |
|-------------------------------------------------------------------|-----------|-----------|
| Translocase of inner mitochondrial membrane 17 homolog B (yeast)  | TIMM17B   | 714895    |
| Translocase of outer mitochondrial membrane 22 homolog (yeast)    | TOMM22    | 701286    |
| Transmembrane 4 L six family member 5                             | TM4SF5    | 709844    |
| Transmembrane 9 superfamily protein member 4                      | TM9SF4    | 712260    |
| Transmembrane phosphoinositide 3-phosphatase and tensin homolog 2 | TPTE2     | 704870    |
| Transmembrane protease, serine 13                                 | TMPRSS13  | 698586    |
| Transmembrane protein 104                                         | TMEM104   | 698592    |
| Transmembrane protein 11                                          | TMEM11    | 704970    |
| Transmembrane protein 115                                         | TMEM115   | 702164    |
| Transmembrane protein 121                                         | TMEM121   | 700005    |
| Transmembrane protein 123                                         | TMEM123   | 702833    |
| Transmembrane protein 135                                         | TMEM135   | 704963    |
| Transmembrane protein 138                                         | TMEM138   | 693905    |
| Transmembrane protein 145                                         | TMEM145   | 709268    |
| Transmembrane protein 150A                                        | TMEM150A  | 696101    |
| Transmembrane protein 160                                         | TMEM160   | 716996    |
| Transmembrane protein 163                                         | TMEM163   | 709015    |
| Transmembrane protein 179B                                        | TMEM179B  | 718518    |
| Transmembrane protein 183A                                        | TMEM183A  | 704195    |
| Transmembrane protein 205                                         | TMEM205   | 714330    |
| Transmembrane protein 248                                         | TMEM248   | 695654    |
| Transmembrane protein 5                                           | TMEM5     | 717102    |
| Transmembrane protein 55A                                         | TMEM55A   | 696779    |
| Transmembrane protein 55B                                         | TMEM55B   | 100428001 |
| Transmembrane protein 60                                          | TMEM60    | 693679    |
| Tribbles pseudokinase 3                                           | TRIB3     | 714636    |
| Tripartite motif containing 33                                    | TRIM33    | 710600    |
| Tripartite motif containing 62                                    | TRIM62    | 709927    |
| Tripartite motif family like 1                                    | TRIML1    | 698114    |
| TRK-fused gene                                                    | TFG       | 700972    |
| Trophoblast glycoprotein                                          | TPBG      | 693944    |
| Tropomyosin 2 (beta)                                              | TPM2      | 696604    |
| Tropomyosin 3                                                     | TPM3      | 716336    |
| Troponin T type 2 (cardiac)                                       | TNNT2     | 709882    |
| Trub pseudouridine (psi) synthase family member 2                 | TRUB2     | 717619    |
| Tryptase gamma 1                                                  | TPSG1     | 100425751 |
| TSSK6 activating co-chaperone                                     | TSACC     | 719490    |
| Tubulin alpha 3c                                                  | TUBA3C    | 707215    |
| Tubulin alpha 4a                                                  | TUBA4A    | 702583    |
| Tubulin beta class I                                              | TUBB      | 574113    |
| Tumor necrosis factor receptor superfamily member 13C             | TNFRSF13C | 712577    |
| Tumor necrosis factor receptor superfamily member 25              | TNFRSF25  | 703744    |
| Tumor protein p53 inducible nuclear protein 2                     | TP53INP2  | 707113    |
| Tumor protein, translationally-controlled 1                       | TPT1      | 702155    |
| Twist family bhlh transcription factor 2                          | TWIST2    | 697078    |
| Tyrosinase-related protein 1                                      | TYRP1     | 714646    |
| Tyrosine kinase, non-receptor, 1                                  | TNK1      | 715180    |

|                                                           |           |           |
|-----------------------------------------------------------|-----------|-----------|
| UBA domain containing 2                                   | UBAC2     | 703484    |
| Ubiquitin A-52 residue ribosomal protein fusion product 1 | UBA52     | 720243    |
| Ubiquitin B                                               | UBB       | 696110    |
| Ubiquitin conjugating enzyme E2 variant 1                 | UBE2V1    | 1.00E+08  |
| Ubiquitin conjugating enzyme E2O                          | UBE2O     | 710529    |
| Ubiquitin domain containing 2                             | UBTD2     | 709455    |
| Ubiquitin like 4B                                         | UBL4B     | 701055    |
| Ubiquitin like 5                                          | UBL5      | 711015    |
| Ubiquitin like 7                                          | UBL7      | 702305    |
| Ubiquitin protein ligase E3D                              | UBE3D     | 694910    |
| Ubiquitin related modifier 1                              | URM1      | 722618    |
| Ubiquitin specific peptidase 10                           | USP10     | 718471    |
| Ubiquitin specific peptidase 11                           | USP11     | 706555    |
| Ubiquitin specific peptidase 20                           | USP20     | 716505    |
| Ubiquitin specific peptidase 21                           | USP21     | 719894    |
| Ubiquitin specific peptidase 26                           | USP26     | 706435    |
| Ubiquitin specific peptidase 47                           | USP47     | 701660    |
| Ubiquitin specific peptidase 48                           | USP48     | 707110    |
| Ubiquitin specific peptidase 7 (herpes virus-associated)  | USP7      | 714625    |
| Ubiquitin specific peptidase 9, Y-linked                  | USP9Y     | 100270703 |
| Ubiquitination factor E4B                                 | UBE4B     | 713348    |
| Ubiquitin-conjugating enzyme E2E 2                        | UBE2E2    | 699101    |
| UBX domain protein 1                                      | UBXN1     | 718643    |
| UBX domain protein 10                                     | UBXN10    | 705058    |
| UBX domain protein 11                                     | UBXN11    | 719826    |
| UHRF1 binding protein 1-like                              | UHRF1BP1L | 694816    |
| Upstream transcription factor family member 3             | USF3      | 709660    |
| Uridine monophosphate synthetase                          | UMPS      | 715664    |
| USP6 N-terminal like                                      | USP6NL    | 694275    |
| V-akt murine thymoma viral oncogene homolog 3             | AKT3      | 714717    |
| Valyl-trna synthetase                                     | VARS      | 715537    |
| Vascular endothelial growth factor A                      | VEGFA     | 574209    |
| Vasoactive intestinal peptide receptor 1                  | VIPR1     | 717438    |
| V-crk avian sarcoma virus CT10 oncogene homolog           | CRK       | 701185    |
| Versican                                                  | VCAN      | 712365    |
| Vesicle (multivesicular body) trafficking 1               | VTA1      | 701578    |
| Villin 1                                                  | VIL1      | 698946    |
| Villin-like                                               | VILL      | 696988    |
| Visual system homeobox 1                                  | VSX1      | 715973    |
| Vitamin K epoxide reductase complex subunit 1             | VKORC1    | 714412    |
| Vitronectin                                               | VTN       | 708499    |
| Von Willebrand factor                                     | VWF       | 722019    |
| VPS39 HOPS complex subunit                                | VPS39     | 707791    |
| VPS52 GARP complex subunit                                | VPS52     | 100430905 |
| VPS54 GARP complex subunit                                | VPS54     | 695397    |
| V-set and immunoglobulin domain containing 4              | VSIG4     | 709685    |
| WAP four-disulfide core domain 12                         | WFDC12    | 711552    |
| WD repeat domain 74                                       | WDR74     | 718460    |

|                                                                        |         |        |
|------------------------------------------------------------------------|---------|--------|
| Wingless-type MMTV integration site family member 7B                   | WNT7B   | 713864 |
| Wolfram syndrome 1 (wolframin)                                         | WFS1    | 710948 |
| WW domain binding protein 1                                            | WBP1    | 709202 |
| WW domain containing E3 ubiquitin protein ligase 2                     | WWP2    | 705464 |
| X-ray repair complementing defective repair in Chinese hamster cells 6 | XRCC6   | 707975 |
| YEATS domain containing 4                                              | YEATS4  | 718376 |
| Yip1 domain family member 4                                            | YIPF4   | 706819 |
| Yippee like 3                                                          | YPEL3   | 708740 |
| YTH N(6)-methyladenosine RNA binding protein 2                         | YTHDF2  | 717225 |
| Zinc binding alcohol dehydrogenase domain containing 2                 | ZADH2   | 701079 |
| Zinc finger and BTB domain containing 39                               | ZBTB39  | 713914 |
| Zinc finger and BTB domain containing 8 opposite strand                | ZBTB8OS | 708590 |
| Zinc finger and SCAN domain containing 2                               | ZSCAN2  | 695673 |
| Zinc finger CCCH-type containing 12A                                   | ZC3H12A | 713604 |
| Zinc finger CCCH-type containing 3                                     | ZC3H3   | 708584 |
| Zinc finger protein 217                                                | ZNF217  | 699314 |
| Zinc finger protein 22                                                 | ZNF22   | 706208 |
| Zinc finger protein 319                                                | ZNF319  | 706286 |
| Zinc finger protein 354B                                               | ZNF354B | 712885 |
| Zinc finger protein 385A                                               | ZNF385A | 705436 |
| Zinc finger protein 41                                                 | ZNF41   | 706770 |
| Zinc finger protein 436                                                | ZNF436  | 709638 |
| Zinc finger protein 467                                                | ZNF467  | 712106 |
| Zinc finger protein 496                                                | ZNF496  | 709694 |
| Zinc finger protein 526                                                | ZNF526  | 707135 |
| Zinc finger protein 574                                                | ZNF574  | 706729 |
| Zinc finger protein 692                                                | ZNF692  | 710010 |
| Zinc finger protein 7                                                  | ZNF7    | 715735 |
| Zinc finger protein 70                                                 | ZNF70   | 698442 |
| Zinc finger protein 79                                                 | ZNF79   | 700961 |
| Zinc finger protein 821                                                | ZNF821  | 707355 |
| Zinc finger, AN1-type domain 2B                                        | ZFAND2B | 702027 |
| Zinc finger, CCCH-type with G-patch domain                             | ZGPAT   | 719499 |
| Zinc finger, CCHC domain containing 10                                 | ZCCHC10 | 709423 |
| Zinc finger, CCHC domain containing 3                                  | ZCCHC3  | 714477 |
| Zinc finger, DHHC-type containing 12                                   | ZDHHC12 | 722606 |
| Zinc finger, DHHC-type containing 16                                   | ZDHHC16 | 705982 |
| Zinc finger, DHHC-type containing 17                                   | ZDHHC17 | 693595 |
| Zinc finger, DHHC-type containing 5                                    | ZDHHC5  | 704863 |
| Zinc finger, matrin-type 5                                             | ZMAT5   | 715058 |
| Zinc finger, MYM-type 4                                                | ZMYM4   | 712793 |
| Zinc finger, MYND-type containing 11                                   | ZMYND11 | 708761 |
| Zinc ribbon domain containing 1                                        | ZNRD1   | 712151 |
| Zona pellucida glycoprotein 2 (sperm receptor)                         | ZP2     | 697458 |
| Zona pellucida glycoprotein 3 (sperm receptor)                         | ZP3     | 719925 |
| Zyg-11 related, cell cycle regulator                                   | ZER1    | 717262 |

**(2) Expressed in both groups 1a and 1b, but not in group 1c**

|                                                                                    |         |        |
|------------------------------------------------------------------------------------|---------|--------|
| 1-acylglycerol-3-phosphate O-acyltransferase 1                                     | AGPAT1  | 717174 |
| 1-acylglycerol-3-phosphate O-acyltransferase 5                                     | AGPAT5  | 716847 |
| 1-aminocyclopropane-1-carboxylate synthase homolog (inactive)                      | ACCS    | 715798 |
| 2-aminoethanethiol (cysteamine) dioxygenase                                        | ADO     | 698259 |
| 2-oxoglutarate and iron-dependent oxygenase domain containing 3                    | OGFOD3  | 716172 |
| 2-phosphoxylose phosphatase 1                                                      | PXYLP1  | 715229 |
| 3-hydroxy-3-methylglutaryl-coa synthase 1                                          | HMGCS1  | 702553 |
| 3-hydroxyacyl-coa dehydratase 1                                                    | HACD1   | 700635 |
| 3-hydroxyanthranilate 3,4-dioxygenase                                              | HAAO    | 713101 |
| 3-oxoacyl-ACP synthase, mitochondrial                                              | OXSM    | 703382 |
| 3'-phosphoadenosine 5'-phosphosulfate synthase 2                                   | PAPSS2  | 704688 |
| 5'-3' exoribonuclease 2                                                            | XRN2    | 700934 |
| 5-aminoimidazole-4-carboxamide ribonucleotide formyltransferase/IMP cyclohydrolase | ATIC    | 694819 |
| 5-hydroxymethylcytosine (hmc) binding, ES cell-specific                            | HMCES   | 703524 |
| 5'-nucleotidase, cytosolic IIIA                                                    | NT5C3A  | 708743 |
| 5-phosphohydroxy-L-lysine phospho-lyase                                            | PHYKPL  | 702302 |
| 5-phosphohydroxy-L-lysine phospho-lyase                                            | PHYKPL  | 702302 |
| 8-oxoguanine DNA glycosylase                                                       | OGG1    | 700481 |
| Aarf domain containing kinase 1                                                    | ADCK1   | 707060 |
| Aarf domain containing kinase 2                                                    | ADCK2   | 693303 |
| Aarf domain containing kinase 3                                                    | ADCK3   | 697920 |
| Aarf domain containing kinase 4                                                    | ADCK4   | 702379 |
| Abhydrolase domain containing 1                                                    | ABHD1   | 698700 |
| Abhydrolase domain containing 14B                                                  | ABHD14B | 698910 |
| Abhydrolase domain containing 16A                                                  | ABHD16A | 716051 |
| Abhydrolase domain containing 6                                                    | ABHD6   | 702384 |
| Abhydrolase domain containing 8                                                    | ABHD8   | 718980 |
| Abl-interactor 2                                                                   | ABI2    | 704956 |
| Acetyl-coa acetyltransferase 1                                                     | ACAT1   | 707653 |
| Acetyl-coa acyltransferase 2                                                       | ACAA2   | 709350 |
| Acetyl-coa carboxylase alpha                                                       | ACACA   | 714218 |
| Achaete-scute family bhlh transcription factor 1                                   | ASCL1   | 698820 |
| Acid phosphatase 6, lysophosphatidic                                               | ACP6    | 710431 |
| Acid phosphatase 7, tartrate resistant (putative)                                  | ACP7    | 695532 |
| Acidic nuclear phosphoprotein 32 family member B                                   | ANP32B  | 715508 |
| Acidic nuclear phosphoprotein 32 family member E                                   | ANP32E  | 706251 |
| Acidic residue methyltransferase 1                                                 | ARMT1   | 704570 |
| Aconitase 1                                                                        | ACO1    | 705075 |
| Aconitase 2                                                                        | ACO2    | 707441 |
| Acrosin binding protein                                                            | ACRBP   | 713219 |
| Actin binding LIM protein 1                                                        | ABLIM1  | 698641 |
| Actin like 6A                                                                      | ACTL6A  | 708935 |
| Actin like 7B                                                                      | ACTL7B  | 710750 |
| Actin related protein 2/3 complex subunit 1A                                       | ARPC1A  | 718635 |

|                                                                 |          |        |
|-----------------------------------------------------------------|----------|--------|
| Actin related protein 2/3 complex subunit 2                     | ARPC2    | 700536 |
| Actin related protein 2/3 complex subunit 3                     | ARPC3    | 709199 |
| Actinin, alpha 2                                                | ACTN2    | 710012 |
| Activating signal cointegrator 1 complex subunit 1              | ASCC1    | 709049 |
| Activating signal cointegrator 1 complex subunit 2              | ASCC2    | 715117 |
| Activating transcription factor 3                               | ATF3     | 710832 |
| Activating transcription factor 4                               | ATF4     | 703965 |
| Activating transcription factor 6                               | ATF6     | 720056 |
| Activin A receptor type I                                       | ACVR1    | 697935 |
| Acyl-coa binding domain containing 6                            | ACBD6    | 716418 |
| Acyl-coa oxidase 1, palmitoyl                                   | ACOX1    | 705197 |
| Acyl-coa thioesterase 8                                         | ACOT8    | 717238 |
| Acyloxyacyl hydrolase                                           | AOAH     | 706291 |
| ADAM metalloproteinase domain 10                                | ADAM10   | 701355 |
| ADAM metalloproteinase domain 19                                | ADAM19   | 715164 |
| ADAM metalloproteinase domain 2                                 | ADAM2    | 707303 |
| ADAM metalloproteinase with thrombospondin type 1 motif 14      | ADAMTS14 | 710154 |
| ADAM metalloproteinase with thrombospondin type 1 motif 16      | ADAMTS16 | 694474 |
| ADAM metalloproteinase with thrombospondin type 1 motif 20      | ADAMTS20 | 699935 |
| ADAM metalloproteinase with thrombospondin type 1 motif 6       | ADAMTS6  | 696021 |
| ADAM metalloproteinase with thrombospondin type 1 motif 9       | ADAMTS9  | 698341 |
| ADAMTS like 2                                                   | ADAMTSL2 | 713492 |
| Adaptor related protein complex 1 associated regulatory protein | AP1AR    | 700734 |
| Adaptor related protein complex 1 mu 1 subunit                  | AP1M1    | 718605 |
| Adaptor related protein complex 2, mu 1 subunit                 | AP2M1    | 703554 |
| Adaptor related protein complex 3, beta 2 subunit               | AP3B2    | 694091 |
| Adaptor related protein complex 3, sigma 1 subunit              | AP3S1    | 696644 |
| Adaptor related protein complex 4, beta 1 subunit               | AP4B1    | 707634 |
| Adaptor related protein complex 5, mu 1 subunit                 | AP5M1    | 701050 |
| Additional sex combs like 2, transcriptional regulator          | ASXL2    | 695057 |
| Adducin 1                                                       | ADD1     | 700805 |
| Adenosine deaminase domain containing 1                         | ADAD1    | 707910 |
| Adenosine deaminase, RNA-specific                               | ADAR     | 718759 |
| Adenosine deaminase, RNA-specific, B1                           | ADARB1   | 722016 |
| Adenosine monophosphate deaminase 2                             | AMPD2    | 699561 |
| Adenylate cyclase 4                                             | ADCY4    | 714684 |
| Adenylate cyclase 6                                             | ADCY6    | 707978 |
| Adenylate kinase 2                                              | AK2      | 709737 |
| Adenylosuccinate synthase                                       | ADSS     | 713580 |
| Adhesion G protein-coupled receptor A3                          | ADGRA3   | 715618 |
| Adhesion G protein-coupled receptor G1                          | ADGRG1   | 613233 |
| Adhesion molecule with Ig-like domain 2                         | AMIGO2   | 705386 |
| Adiponectin receptor 2                                          | ADIPOR2  | 707547 |
| ADP ribosylation factor 4                                       | ARF4     | 703432 |
| ADP ribosylation factor gtpase activating protein 3             | ARFGAP3  | 711160 |
| ADP ribosylation factor guanine nucleotide exchange factor 1    | ARFGEF1  | 704359 |
| ADP ribosylation factor like gtpase 2 binding protein           | ARL2BP   | 703999 |
| ADP ribosylation factor like gtpase 8B                          | ARL8B    | 703201 |

|                                                                                                                        |          |           |
|------------------------------------------------------------------------------------------------------------------------|----------|-----------|
| ADP-ribosylhydrolase like 2                                                                                            | ADPRHL2  | 712758    |
| AHA1, activator of heat shock 90kda protein ATPase homolog 1 (yeast)                                                   | AHSA1    | 706547    |
| Ajuba LIM protein                                                                                                      | AJUBA    | 712865    |
| A-kinase anchoring protein 1                                                                                           | AKAP1    | 708500    |
| A-kinase anchoring protein 10                                                                                          | AKAP10   | 710970    |
| A-kinase anchoring protein 12                                                                                          | AKAP12   | 641446    |
| A-kinase anchoring protein 17A                                                                                         | AKAP17A  | 693468    |
| A-kinase anchoring protein 9                                                                                           | AKAP9    | 702970    |
| Aladin WD repeat nucleoporin                                                                                           | AAAS     | 719095    |
| Aldehyde dehydrogenase 18 family member A1                                                                             | ALDH18A1 | 703357    |
| Aldo-keto reductase family 1, member A1 (aldehyde reductase)                                                           | AKR1A1   | 693380    |
| Aldo-keto reductase family 1, member B1 (aldose reductase)                                                             | AKR1B1   | 705957    |
| Aldo-keto reductase family 1, member C1 (dihydrodiol dehydrogenase 1; 20-alpha (3-alpha)-hydroxysteroid dehydrogenase) | AKR1C1   | 711198    |
| ALG2, alpha-1,3/1,6-mannosyltransferase                                                                                | ALG2     | 714850    |
| ALG5, dolichyl-phosphate beta-glucosyltransferase                                                                      | ALG5     | 694836    |
| Alkaline ceramidase 1                                                                                                  | ACER1    | 699093    |
| Alkb homolog 2, alpha-ketoglutarate-dependent dioxygenase                                                              | ALKBH2   | 706708    |
| Alkb homolog 4, lysine demethylase                                                                                     | ALKBH4   | 715078    |
| Alkb homolog 7                                                                                                         | ALKBH7   | 699343    |
| All-trans retinoic acid induced differentiation factor                                                                 | ATRAID   | 699201    |
| Alpha hemoglobin stabilizing protein                                                                                   | AHSP     | 714392    |
| Alpha thalassemia/mental retardation syndrome X-linked                                                                 | ATRX     | 705735    |
| Alpha-2-HS-glycoprotein                                                                                                | AHSG     | 699348    |
| Amine oxidase, copper containing 2                                                                                     | AOC2     | 100431015 |
| Aminoacylase 3                                                                                                         | ACY3     | 711083    |
| Aminocarboxymuconate semialdehyde decarboxylase                                                                        | ACMSD    | 708917    |
| Aminomethyltransferase                                                                                                 | AMT      | 706515    |
| Amino-terminal enhancer of split                                                                                       | AES      | 712353    |
| Amylase, alpha 2B (pancreatic)                                                                                         | AMY2B    | 712893    |
| Amyloid beta (A4) precursor protein-binding, family B, member 1 (Fe65)                                                 | APBB1    | 712585    |
| Amyloid beta (A4) precursor protein-binding, family B, member 3                                                        | APBB3    | 698296    |
| Amyloid beta (A4) precursor-like protein 2                                                                             | APLP2    | 718819    |
| Anaphase promoting complex subunit 13                                                                                  | ANAPC13  | 717294    |
| Anaphase promoting complex subunit 15                                                                                  | ANAPC15  | 718333    |
| Anaphase promoting complex subunit 2                                                                                   | ANAPC2   | 706384    |
| Anaphase promoting complex subunit 4                                                                                   | ANAPC4   | 694006    |
| Ancient ubiquitous protein 1                                                                                           | AUP1     | 710020    |
| Androgen-induced 1                                                                                                     | AIG1     | 700988    |
| Angiopoietin like 7                                                                                                    | ANGPTL7  | 714204    |
| Angiotensin II receptor-associated protein                                                                             | AGTRAP   | 722746    |
| Ankyrin 3, node of Ranvier (ankyrin G)                                                                                 | ANK3     | 699518    |
| Ankyrin repeat and IBR domain containing 1                                                                             | ANKIB1   | 703273    |
| Ankyrin repeat and SOCS box containing 3                                                                               | ASB3     | 716503    |
| Ankyrin repeat domain 1 (cardiac muscle)                                                                               | ANKRD1   | 696653    |

|                                                                     |          |           |
|---------------------------------------------------------------------|----------|-----------|
| Ankyrin repeat domain 10                                            | ANKRD10  | 695300    |
| Ankyrin repeat domain 13C                                           | ANKRD13C | 702811    |
| Ankyrin repeat domain 2 (stretch responsive muscle)                 | ANKRD2   | 707097    |
| Ankyrin repeat domain 27                                            | ANKRD27  | 716232    |
| Ankyrin repeat domain 49                                            | ANKRD49  | 697693    |
| Ankyrin repeat domain 6                                             | ANKRD6   | 701339    |
| Ankyrin repeat, family A (RFXANK-like), 2                           | ANKRA2   | 703691    |
| Annexin A11                                                         | ANXA11   | 707628    |
| Anti-silencing function 1A histone chaperone                        | ASF1A    | 714761    |
| Antizyme inhibitor 1                                                | AZIN1    | 693581    |
| APEX nuclease (multifunctional DNA repair enzyme) 1                 | APEX1    | 702757    |
| Apolipoprotein B mrna editing enzyme, catalytic polypeptide-like 3G | APOBEC3G | 574398    |
| Apolipoprotein B mrna editing enzyme, catalytic polypeptide-like 3H | APOBEC3H | 723811    |
| Apolipoprotein C-III                                                | APOC3    | 696726    |
| Apolipoprotein O                                                    | APOO     | 698137    |
| Apoptosis inducing factor, mitochondria associated 1                | AIFM1    | 702773    |
| Apoptosis inducing factor, mitochondria associated 3                | AIFM3    | 100430573 |
| Apoptosis inhibitor 5                                               | API5     | 716346    |
| Apoptosis, caspase activation inhibitor                             | AVEN     | 695227    |
| Aprataxin                                                           | APTIX    | 702671    |
| Aquaporin 4                                                         | AQP4     | 703773    |
| Aquaporin 8                                                         | AQP8     | 702167    |
| Arachidonate 5-lipoxygenase-activating protein                      | ALOX5AP  | 713170    |
| Arfgap with rhogap domain, ankyrin repeat and PH domain 2           | ARAP2    | 702115    |
| Arfgap with rhogap domain, ankyrin repeat and PH domain 3           | ARAP3    | 701400    |
| Arginine and glutamate rich 1                                       | ARGLU1   | 702840    |
| Arginine/serine-rich coiled-coil 2                                  | RSRC2    | 706564    |
| Arginine/serine-rich protein 1                                      | RSRP1    | 712757    |
| Arginine-glutamic acid dipeptide (RE) repeats                       | RERE     | 708902    |
| Arginyl aminopeptidase (aminopeptidase B)                           | RNPEP    | 706696    |
| Arginyl aminopeptidase (aminopeptidase B)-like 1                    | RNPEPL1  | 716318    |
| Arginyltransferase 1                                                | ATE1     | 705248    |
| Arginyl-trna synthetase                                             | RARS     | 698998    |
| Arginyl-trna synthetase 2, mitochondrial                            | RARS2    | 699240    |
| Armadillo repeat containing 9                                       | ARMC9    | 711891    |
| Armadillo repeat containing, X-linked 3                             | ARMCX3   | 704035    |
| ARP2 actin-related protein 2 homolog (yeast)                        | ACTR2    | 697080    |
| ARP3 actin-related protein 3 homolog B (yeast)                      | ACTR3B   | 715965    |
| ARP5 actin-related protein 5 homolog (yeast)                        | ACTR5    | 698191    |
| Arrestin, beta 1                                                    | ARRB1    | 695250    |
| Arrestin, beta 2                                                    | ARRB2    | 709399    |
| Artemin                                                             | ARTN     | 701641    |
| ARV1 homolog, fatty acid homeostasis modulator                      | ARV1     | 713975    |
| Aryl hydrocarbon receptor nuclear translocator like                 | ARNTL    | 700464    |
| Ash2 (absent, small, or homeotic)-like (Drosophila)                 | ASH2L    | 699382    |
| Asparaginase like 1                                                 | ASRGL1   | 718871    |



|                                                                                                      |          |           |
|------------------------------------------------------------------------------------------------------|----------|-----------|
| Asparagine synthetase (glutamine-hydrolyzing)                                                        | ASNS     | 697232    |
| Aspartyl aminopeptidase                                                                              | DNPEP    | 703180    |
| Asteroid homolog 1 (Drosophila)                                                                      | ASTE1    | 719271    |
| Ataxin 2-like                                                                                        | ATXN2L   | 708359    |
| AT-hook containing transcription factor 1                                                            | AHCTF1   | 702705    |
| Atlantin gtpase 2                                                                                    | ATL2     | 710647    |
| ATP binding cassette subfamily A member 5                                                            | ABCA5    | 693795    |
| ATP binding cassette subfamily A member 7                                                            | ABCA7    | 704976    |
| ATP binding cassette subfamily B member 7                                                            | ABCB7    | 704034    |
| ATP binding cassette subfamily E member 1                                                            | ABCE1    | 701945    |
| ATP binding cassette subfamily F member 3                                                            | ABCF3    | 703319    |
| ATP binding cassette subfamily G member 2 (Junior blood group)                                       | ABCG2    | 574307    |
| ATP binding cassette subfamily G member 8                                                            | ABCG8    | 713676    |
| ATP citrate lyase                                                                                    | ACLY     | 708501    |
| ATP synthase F0 subunit 6                                                                            | ATP6     | 2846629   |
| ATP synthase, H <sup>+</sup> transporting, mitochondrial F1 complex, alpha subunit 1, cardiac muscle | ATP5A1   | 701389    |
| ATP synthase, H <sup>+</sup> transporting, mitochondrial F1 complex, beta polypeptide                | ATP5B    | 713284    |
| ATP synthase, H <sup>+</sup> transporting, mitochondrial F1 complex, gamma polypeptide 1             | ATP5C1   | 713768    |
| ATP synthase, H <sup>+</sup> transporting, mitochondrial F1 complex, O subunit                       | ATP5O    | 698480    |
| ATP synthase, H <sup>+</sup> transporting, mitochondrial Fo complex subunit D                        | ATP5H    | 700338    |
| ATP synthase, H <sup>+</sup> transporting, mitochondrial Fo complex subunit F6                       | ATP5J    | 708411    |
| ATPase inhibitory factor 1                                                                           | ATPIF1   | 716870    |
| ATPase type 13A1                                                                                     | ATP13A1  | 100427506 |
| ATPase type 13A2                                                                                     | ATP13A2  | 699678    |
| ATPase, Ca <sup>++</sup> transporting, plasma membrane 1                                             | ATP2B1   | 709102    |
| ATPase, class II, type 9A                                                                            | ATP9A    | 710250    |
| ATPase, H <sup>+</sup> transporting, lysosomal 13kda, V1 subunit G1                                  | ATP6V1G1 | 703655    |
| ATPase, H <sup>+</sup> transporting, lysosomal 14kda, V1 subunit F                                   | ATP6V1F  | 702112    |
| ATPase, H <sup>+</sup> transporting, lysosomal 31kda, V1 subunit E1                                  | ATP6V1E1 | 709739    |
| ATPase, H <sup>+</sup> transporting, lysosomal 56/58kda, V1 subunit B2                               | ATP6V1B2 | 705605    |
| ATPase, H <sup>+</sup> transporting, lysosomal 9kda, V0 subunit e1                                   | ATP6V0E1 | 703342    |
| ATPase, H <sup>+</sup> transporting, lysosomal accessory protein 2                                   | ATP6AP2  | 705048    |
| ATPase, H <sup>+</sup> /K <sup>+</sup> exchanging, alpha polypeptide                                 | ATP4A    | 100426215 |
| ATPase, Na <sup>+</sup> /K <sup>+</sup> transporting, alpha 1 polypeptide                            | ATP1A1   | 710368    |
| ATP-binding cassette transporter 13                                                                  | ABCC13   | 574326    |
| ATR serine/threonine kinase                                                                          | ATR      | 714443    |
| AT-rich interaction domain 4B                                                                        | ARID4B   | 718320    |
| Atypical chemokine receptor 1 (Duffy blood group)                                                    | ACKR1    | 719284    |
| AU RNA binding protein/enoyl-coa hydratase                                                           | AUH      | 704542    |
| Aurora kinase B                                                                                      | AURKB    | 721955    |
| Autocrine motility factor receptor, E3 ubiquitin protein ligase                                      | AMFR     | 699972    |
| Autophagy related 16 like 1                                                                          | ATG16L1  | 714092    |

|                                                                         |          |        |
|-------------------------------------------------------------------------|----------|--------|
| Autophagy related 2A                                                    | ATG2A    | 717290 |
| Autophagy related 3                                                     | ATG3     | 708305 |
| Autophagy related 4A, cysteine peptidase                                | ATG4A    | 703367 |
| Autophagy related 4D, cysteine peptidase                                | ATG4D    | 713111 |
| Autophagy related 5                                                     | ATG5     | 696874 |
| Autophagy related 7                                                     | ATG7     | 696238 |
| Autophagy/beclin-1 regulator 1                                          | AMBRA1   | 714434 |
| B9 protein domain 2                                                     | B9D2     | 704873 |
| BAI1-associated protein 2-like 2                                        | BAIAP2L2 | 700058 |
| Bardet-Biedl syndrome 10                                                | BBS10    | 693270 |
| Bardet-Biedl syndrome 2                                                 | BBS2     | 700353 |
| Bardet-Biedl syndrome 4                                                 | BBS4     | 704508 |
| Bardet-Biedl syndrome 5                                                 | BBS5     | 709701 |
| Bardet-Biedl syndrome 9                                                 | BBS9     | 708412 |
| Basic helix-loop-helix family member e40                                | BHLHE40  | 707083 |
| Basic leucine zipper and W2 domains 1                                   | BZW1     | 701731 |
| Basic leucine zipper and W2 domains 2                                   | BZW2     | 714627 |
| Basic leucine zipper transcription factor, ATF-like 2                   | BATF2    | 722022 |
| Basic transcription factor 3                                            | BTF3     | 703339 |
| Basic transcription factor 3-like 4                                     | BTF3L4   | 712955 |
| B-cell CLL/lymphoma 6                                                   | BCL6     | 708736 |
| B-cell CLL/lymphoma 9                                                   | BCL9     | 700800 |
| B-cell receptor-associated protein 31                                   | BCAP31   | 696663 |
| B-cell translocation gene 1, anti-proliferative                         | BTG1     | 710112 |
| BCL2 associated athanogene 2                                            | BAG2     | 712778 |
| BCL2/adenovirus E1B 19kda interacting protein 1                         | BNIP1    | 703576 |
| BCL2-associated X protein                                               | BAX      | 718948 |
| BCL2-like 1                                                             | BCL2L1   | 713035 |
| BCL2-like 13 (apoptosis facilitator)                                    | BCL2L13  | 709825 |
| BCL2-like 14 (apoptosis facilitator)                                    | BCL2L14  | 695971 |
| BCS1-like (S. Cerevisiae)                                               | BCS1L    | 699690 |
| Beclin 1, autophagy related                                             | BECN1    | 711649 |
| BEN domain containing 6                                                 | BEND6    | 712498 |
| Beta 3-glucosyltransferase                                              | B3GLCT   | 713498 |
| Beta-1,3-galactosyltransferase 1                                        | B3GALT1  | 704744 |
| Beta-1,3-galactosyltransferase 4                                        | B3GALT4  | 718178 |
| Beta-1,3-N-acetylgalactosaminyltransferase 1<br>(globoside blood group) | B3GALNT1 | 703939 |
| Beta-1,4-glucuronyltransferase 1                                        | B4GAT1   | 714270 |
| Beta-2-microglobulin                                                    | B2M      | 712428 |
| Beta-site APP-cleaving enzyme 1                                         | BACE1    | 697694 |
| Bicaudal D homolog 2 (Drosophila)                                       | BICD2    | 706621 |
| Biliverdin reductase A                                                  | BLVRA    | 700980 |
| Bisphosphoglycerate mutase                                              | BPGM     | 706741 |
| Bladder cancer associated protein                                       | BLCAP    | 708044 |
| BLOC-1 related complex subunit 5                                        | BORCS5   | 696469 |
| Bloom syndrome, recq helicase-like                                      | BLM      | 703460 |
| Bola family member 1                                                    | BOLA1    | 705297 |

|                                                                        |           |        |
|------------------------------------------------------------------------|-----------|--------|
| Bone morphogenetic protein 1                                           | BMP1      | 707596 |
| Bone morphogenetic protein receptor type IA                            | BMPRI1A   | 696898 |
| BPI fold containing family A member 2                                  | BPIFA2    | 710376 |
| BPI fold containing family C                                           | BPIFC     | 717287 |
| Brain and reproductive organ-expressed<br>(TNFRSF1A modulator)         | BRE       | 702365 |
| Brain protein I3                                                       | BRI3      | 706525 |
| Branched chain amino-acid transaminase 2, mitochondrial                | BCAT2     | 718305 |
| Branched chain keto acid dehydrogenase E1, beta polypeptide            | BCKDHB    | 718472 |
| BRCA1 associated RING domain 1                                         | BARD1     | 694301 |
| BRCA2 and CDKN1A interacting protein                                   | BCCIP     | 699437 |
| Breast cancer anti-estrogen resistance 1                               | BCAR1     | 713965 |
| BRICHOS domain containing 5                                            | BRICD5    | 695765 |
| BRISC and BRCA1 A complex member 1                                     | BABAM1    | 718969 |
| Bromo adjacent homology domain containing 1                            | BAHD1     | 702982 |
| Bromodomain adjacent to zinc finger domain 1B                          | BAZ1B     | 716436 |
| Bromodomain containing 1                                               | BRD1      | 715059 |
| Bromodomain containing 2                                               | BRD2      | 717893 |
| Bromodomain containing 7                                               | BRD7      | 694850 |
| BRX1, biogenesis of ribosomes                                          | BRX1      | 698745 |
| BTB (POZ) domain containing 1                                          | BTBD1     | 718696 |
| BTB (POZ) domain containing 10                                         | BTBD10    | 700325 |
| BTB (POZ) domain containing 16                                         | BTBD16    | 705610 |
| BTB and CNC homology 1, basic leucine zipper transcription<br>factor 1 | BACH1     | 705817 |
| BTG3 associated nuclear protein                                        | BANP      | 696125 |
| BUB3 mitotic checkpoint protein                                        | BUB3      | 708033 |
| BUD31 homolog                                                          | BUD31     | 718694 |
| Bystin like                                                            | BYSL      | 694976 |
| C1GALT1 specific chaperone 1                                           | C1GALT1C1 | 696662 |
| C2CD2-like                                                             | C2CD2L    | 703424 |
| Cadherin 11, type 2, OB-cadherin (osteoblast)                          | CDH11     | 708826 |
| Cadherin 13                                                            | CDH13     | 718038 |
| Cadherin 17, LI cadherin (liver-intestine)                             | CDH17     | 698886 |
| Cadherin 5, type 2 (vascular endothelium)                              | CDH5      | 693297 |
| Cadherin related family member 2                                       | CDHR2     | 697249 |
| Calcium activated nucleotidase 1                                       | CANT1     | 710935 |
| Calcium and integrin binding 1                                         | CIB1      | 701842 |
| Calcium binding protein 39                                             | CAB39     | 711166 |
| Calcium homeostasis endoplasmic reticulum protein                      | CHERP     | 718689 |
| Calcium homeostasis modulator 2                                        | CALHM2    | 714662 |
| Calcium regulated heat stable protein 1                                | CARHSP1   | 709224 |
| Calcium release activated channel regulator 2B                         | CRACR2B   | 700951 |
| Calcium/calmodulin-dependent protein kinase II delta                   | CAMK2D    | 702504 |
| Calcium/calmodulin-dependent protein kinase II gamma                   | CAMK2G    | 705980 |
| Calcium/calmodulin-dependent protein kinase kinase 1, alpha            | CAMKK1    | 707562 |
| Calcium/calmodulin-dependent protein kinase kinase 2, beta             | CAMKK2    | 699685 |
| Calcium/calmodulin-dependent serine protein kinase                     | CASK      | 707428 |

|                                                                                  |          |           |
|----------------------------------------------------------------------------------|----------|-----------|
| (MAGUK family)                                                                   |          |           |
| Calcyclin binding protein                                                        | CACYBP   | 709343    |
| Calmin (calponin-like, transmembrane)                                            | CLMN     | 709910    |
| Calmodulin regulated spectrin associated protein family member 2                 | CAMSAP2  | 709092    |
| Calnexin                                                                         | CANX     | 704794    |
| Calpain 1, (mu/I) large subunit                                                  | CAPN1    | 716618    |
| Calpain 10                                                                       | CAPN10   | 716360    |
| Calpain 15                                                                       | CAPN15   | 695881    |
| Calpain 3                                                                        | CAPN3    | 707913    |
| Calponin 3, acidic                                                               | CNN3     | 709538    |
| Calreticulin                                                                     | CALR     | 716910    |
| Calumenin                                                                        | CALU     | 699730    |
| Camp responsive element binding protein 3                                        | CREB3    | 696350    |
| Camp responsive element binding protein 3-like 4                                 | CREB3L4  | 715951    |
| Cancer susceptibility candidate 3                                                | CASC3    | 699712    |
| Cannabinoid receptor 2                                                           | CNR2     | 711155    |
| Cannabinoid receptor interacting protein 1                                       | CNRIP1   | 698827    |
| CAP, adenylate cyclase-associated protein 1 (yeast)                              | CAP1     | 693719    |
| Capping protein (actin filament) muscle Z-line, alpha 1                          | CAPZA1   | 705653    |
| Capping protein (actin filament) muscle Z-line, alpha 2                          | CAPZA2   | 704662    |
| Caprin family member 2                                                           | CAPRIN2  | 693594    |
| Carbamoyl-phosphate synthetase 2, aspartate transcarbamylase, and dihydroorotase | CAD      | 699460    |
| Carbohydrate (N-acetylgalactosamine 4-0) sulfotransferase 14                     | CHST14   | 703115    |
| Carboxypeptidase E                                                               | CPE      | 708881    |
| Carboxypeptidase N subunit 2                                                     | CPN2     | 106997189 |
| Carboxypeptidase Q                                                               | CPQ      | 701711    |
| Carboxypeptidase, vitellogenic-like                                              | CPVL     | 697111    |
| Carnitine palmitoyltransferase 1A (liver)                                        | CPT1A    | 709837    |
| Carnitine palmitoyltransferase 2                                                 | CPT2     | 714150    |
| Casein kinase 1, alpha 1                                                         | CSNK1A1  | 710775    |
| Casein kinase 1, alpha 1-like                                                    | CSNK1A1L | 695190    |
| Casein kinase 1, gamma 3                                                         | CSNK1G3  | 701702    |
| Casein kinase 2, alpha 1 polypeptide                                             | CSNK2A1  | 714841    |
| Casein kinase 2, beta polypeptide                                                | CSNK2B   | 715807    |
| Caseinolytic mitochondrial matrix peptidase chaperone subunit                    | CLPX     | 708954    |
| CASK interacting protein 2                                                       | CASKIN2  | 702477    |
| Caspase 1                                                                        | CASP1    | 706568    |
| Caspase 4                                                                        | CASP4    | 704864    |
| Caspase 8 associated protein 2                                                   | CASP8AP2 | 702294    |
| Caspase 9                                                                        | CASP9    | 694544    |
| Caspase recruitment domain family member 18                                      | CARD18   | 705678    |
| Cat eye syndrome chromosome region, candidate 5                                  | CECR5    | 709197    |
| Catalase                                                                         | CAT      | 717406    |
| Catechol-O-methyltransferase                                                     | COMT     | 712548    |
| Catechol-O-methyltransferase domain containing 1                                 | COMTD1   | 704152    |
| Catenin alpha 1                                                                  | CTNNA1   | 574385    |
| Catenin alpha-like 1                                                             | CTNNAL1  | 710389    |

|                                                   |            |           |
|---------------------------------------------------|------------|-----------|
| Catenin beta 1                                    | CTNNB1     | 574265    |
| Catenin beta like 1                               | CTNNBL1    | 700310    |
| Cathepsin B                                       | CTSB       | 100424758 |
| Cathepsin C                                       | CTSC       | 705320    |
| Cathepsin H                                       | CTSH       | 711437    |
| Cathepsin H                                       | CTSH       | 711437    |
| Cbl proto-oncogene B, E3 ubiquitin protein ligase | CBLB       | 703879    |
| Cbl proto-oncogene C, E3 ubiquitin protein ligase | CBLC       | 713112    |
| CCAAT/enhancer binding protein (C/EBP), zeta      | CEBPZ      | 712090    |
| CCCTC-binding factor (zinc finger protein)-like   | CTCFL      | 701500    |
| CCR4-NOT transcription complex subunit 1          | CNOT1      | 712880    |
| CCR4-NOT transcription complex subunit 10         | CNOT10     | 704986    |
| CCR4-NOT transcription complex subunit 3          | CNOT3      | 693292    |
| CCR4-NOT transcription complex subunit 7          | CNOT7      | 702192    |
| CCR4-NOT transcription complex subunit 8          | CNOT8      | 714813    |
| CD14 molecule                                     | CD14       | 697482    |
| CD19 molecule                                     | CD19       | 705211    |
| CD1c molecule                                     | CD1C       | 717148    |
| CD2 (cytoplasmic tail) binding protein 2          | CD2BP2     | 709961    |
| CD200 molecule                                    | CD200      | 708110    |
| CD2-associated protein                            | CD2AP      | 705221    |
| CD40 ligand                                       | CD40LG     | 574160    |
| CD53 molecule                                     | CD53       | 702350    |
| CD58 molecule                                     | CD58       | 710732    |
| CD63 molecule                                     | CD63       | 709828    |
| CD79b molecule                                    | CD79B      | 718218    |
| CD86 molecule                                     | CD86       | 714390    |
| CD8b molecule                                     | CD8B       | 699409    |
| CD9 molecule                                      | CD9        | 712262    |
| CDC like kinase 1                                 | CLK1       | 700320    |
| CDC like kinase 3                                 | CLK3       | 702511    |
| CDC28 protein kinase regulatory subunit 1B        | CKS1B      | 717164    |
| CDC42 effector protein (Rho gtpase binding) 4     | CDC42EP4   | 696227    |
| CDGSH iron sulfur domain 1                        | CISD1      | 701716    |
| CDKN1A interacting zinc finger protein 1          | CIZ1       | 717725    |
| CDKN2A interacting protein                        | CDKN2AIP   | 701583    |
| CDKN2A interacting protein N-terminal like        | CDKN2AIPNL | 710774    |
| Cell cycle and apoptosis regulator 2              | CCAR2      | 716288    |
| Cell death-inducing DFFA-like effector b          | CIDEB      | 100425328 |
| Cell division cycle 16                            | CDC16      | 699089    |
| Cell division cycle 26                            | CDC26      | 706165    |
| Cell division cycle 37                            | CDC37      | 715390    |
| Cell division cycle 37-like 1                     | CDC37L1    | 694831    |
| Cell division cycle 5 like                        | CDC5L      | 703099    |
| Cell division cycle 6                             | CDC6       | 700081    |
| Cell division cycle and apoptosis regulator 1     | CCAR1      | 693585    |
| Cell division cycle associated 7                  | CDCA7      | 696474    |
| Cell growth regulator with ring finger domain 1   | CGRRF1     | 695231    |

|                                                                               |            |           |
|-------------------------------------------------------------------------------|------------|-----------|
| Centrin 1                                                                     | CETN1      | 697701    |
| Centrin 3                                                                     | CETN3      | 695223    |
| Centriolin                                                                    | CNTRL      | 700200    |
| Centrobin, centrosomal BRCA2 interacting protein                              | CNTROB     | 716660    |
| Centromere protein C                                                          | CENPC      | 710620    |
| Centromere protein M                                                          | CENPM      | 709006    |
| Centrosomal protein 170kda                                                    | CEP170     | 705427    |
| Centrosomal protein 192kda                                                    | CEP192     | 722121    |
| Centrosomal protein 290kda                                                    | CEP290     | 708286    |
| Centrosomal protein 41kda                                                     | CEP41      | 703215    |
| Centrosomal protein 57kda-like 1                                              | CEP57L1    | 700109    |
| Centrosomal protein 70kda                                                     | CEP70      | 716263    |
| Centrosomal protein 72kda                                                     | CEP72      | 708753    |
| Centrosomal protein 83kda                                                     | CEP83      | 711408    |
| Centrosomal protein 85kda-like                                                | CEP85L     | 714810    |
| Ceramide synthase 2                                                           | CERS2      | 716180    |
| Ceramide synthase 4                                                           | CERS4      | 706728    |
| Ceramide synthase 6                                                           | CERS6      | 704953    |
| Cerberus 1, DAN family BMP antagonist                                         | CER1       | 713924    |
| Cerebellar degeneration related protein 2                                     | CDR2       | 698974    |
| Cerebellar degeneration-related protein 2-like                                | CDR2L      | 700082    |
| Cerebral cavernous malformation 2                                             | CCM2       | 705037    |
| Ceroid-lipofuscinosis, neuronal 6, late infantile, variant                    | CLN6       | 693873    |
| CGG triplet repeat binding protein 1                                          | CGGBP1     | 693920    |
| Chaperonin containing TCP1, subunit 2 (beta)                                  | CCT2       | 717182    |
| Chaperonin containing TCP1, subunit 3 (gamma)                                 | CCT3       | 718374    |
| Chaperonin containing TCP1, subunit 5 (epsilon)                               | CCT5       | 696640    |
| Chaperonin containing TCP1, subunit 8 (theta)                                 | CCT8       | 706184    |
| Charged multivesicular body protein 1B                                        | CHMP1B     | 106995257 |
| Charged multivesicular body protein 4B                                        | CHMP4B     | 709004    |
| Charged multivesicular body protein 6                                         | CHMP6      | 718353    |
| Checkpoint kinase 2                                                           | CHEK2      | 713668    |
| Checkpoint with forkhead and ring finger domains, E3 ubiquitin protein ligase | CHFR       | 694297    |
| Chemokine (C-C motif) ligand 18                                               | CCL18      | 574181    |
| Chemokine (C-C motif) ligand 27                                               | CCL27      | 574220    |
| Chemokine (C-C motif) ligand 7                                                | CCL7       | 714751    |
| Chemokine (C-X-C motif) receptor 3                                            | CXCR3      | 699438    |
| Chemokine (C-X-C motif) receptor 4                                            | CXCR4      | 707329    |
| Chitinase domain containing 1                                                 | CHID1      | 701435    |
| Chloride intracellular channel 4                                              | CLIC4      | 712337    |
| Choline kinase beta                                                           | CHKB       | 716377    |
| Choline O-acetyltransferase                                                   | CHAT       | 709977    |
| Choline/ethanolamine phosphotransferase 1                                     | CEPT1      | 702700    |
| Cholinergic receptor, nicotinic alpha 3                                       | CHRNA3     | 716571    |
| Chondroitin polymerizing factor                                               | CHPF       | 703860    |
| Chondroitin sulfate N-acetylgalactosaminyltransferase 1                       | CSGALNACT1 | 704901    |

|                                                  |             |           |
|--------------------------------------------------|-------------|-----------|
| Chromatin accessibility complex 1                | CHRA1       | 700384    |
| Chromatin target of PRMT1                        | CHTOP       | 715501    |
| Chromobox 1                                      | CBX1        | 696673    |
| Chromobox 7                                      | CBX7        | 703056    |
| Chromodomain helicase DNA binding protein 3      | CHD3        | 716508    |
| Chromodomain helicase DNA binding protein 4      | CHD4        | 713162    |
| Chromodomain protein, Y-like                     | CDYL        | 722957    |
| Chromosome 1 open reading frame, human c1orf123  | C1H1orf123  | 714201    |
| Chromosome 1 open reading frame, human c1orf131  | C1H1orf131  | 719141    |
| Chromosome 1 open reading frame, human c1orf198  | C1H1orf198  | 714084    |
| Chromosome 1 open reading frame, human c1orf50   | C1H1orf50   | 698058    |
| Chromosome 1 open reading frame, human c1orf52   | C1H1orf52   | 711232    |
| Chromosome 1 open reading frame, human c1orf54   | C1H1orf54   | 107000835 |
| Chromosome 10 open reading frame 93 ortholog     | C9H10orf93  | 719561    |
| Chromosome 11 open reading frame, human c12orf4  | C11H12orf4  | 710836    |
| Chromosome 11 open reading frame, human c12orf57 | C11H12orf57 | 714482    |
| Chromosome 12 open reading frame, human c2orf47  | C12H2orf47  | 699322    |
| Chromosome 13 open reading frame, human c2orf49  | C13H2orf49  | 713165    |
| Chromosome 14 open reading frame, human c11orf73 | C14H11orf73 | 704098    |
| Chromosome 14 open reading frame, human c11orf74 | C14H11orf74 | 716798    |
| Chromosome 15 open reading frame, human c9orf135 | C15H9orf135 | 700202    |
| Chromosome 15 open reading frame, human c9orf142 | C15H9orf142 | 707874    |
| Chromosome 15 open reading frame, human c9orf16  | C15H9orf16  | 722628    |
| Chromosome 15 open reading frame, human c9orf72  | C15H9orf72  | 706828    |
| Chromosome 15 open reading frame, human c9orf9   | C15H9orf9   | 714749    |
| Chromosome 16 open reading frame, human c17orf49 | C16H17orf49 | 713820    |
| Chromosome 18 open reading frame, human c18orf21 | C18H18orf21 | 715440    |
| Chromosome 19 open reading frame, human c19orf24 | C19H19orf24 | 706393    |
| Chromosome 19 open reading frame, human c19orf52 | C19H19orf52 | 713825    |
| Chromosome 19 open reading frame, human c19orf53 | C19H19orf53 | 720745    |
| Chromosome 2 open reading frame, human c3orf14   | C2H3orf14   | 699965    |
| Chromosome 20 open reading frame 24 ortholog     | C10H20orf24 | 709696    |
| Chromosome 3 open reading frame, human c21orf59  | C3H21orf59  | 700721    |
| Chromosome 3 open reading frame, human c21orf91  | C3H21orf91  | 710406    |
| Chromosome 3 open reading frame, human c7orf25   | C3H7orf25   | 708455    |
| Chromosome 4 open reading frame, human c6orf136  | C4H6orf136  | 712108    |
| Chromosome 4 open reading frame, human c6orf203  | C4H6orf203  | 698108    |
| Chromosome 4 open reading frame, human c6orf89   | C4H6orf89   | 719165    |
| Chromosome 5 open reading frame, human c4orf27   | C5H4orf27   | 694607    |
| Chromosome 5 open reading frame, human c4orf45   | C5H4orf45   | 100427199 |
| Chromosome 6 open reading frame, human c5orf15   | C6H5orf15   | 709969    |
| Chromosome 6 open reading frame, human c5orf22   | C6H5orf22   | 695901    |
| Chromosome 6 open reading frame, human c5orf28   | C6H5orf28   | 100427219 |
| Chromosome 6 open reading frame, human c5orf30   | C6H5orf30   | 703692    |
| Chromosome 6 open reading frame, human c5orf34   | C6H5orf34   | 700618    |
| Chromosome 7 open reading frame, human c14orf142 | C7H14orf142 | 704509    |
| Chromosome 7 open reading frame, human c14orf166 | C7H14orf166 | 710094    |
| Chromosome 7 open reading frame, human c14orf169 | C7H14orf169 | 696773    |

|                                                         |             |        |
|---------------------------------------------------------|-------------|--------|
| Chromosome 7 open reading frame, human c15orf57         | C7H15orf57  | 703343 |
| Chromosome 8 open reading frame, human c8orf59          | C8H8orf59   | 703464 |
| Chromosome 8 open reading frame, human c8orf76          | C8H8orf76   | 704150 |
| Chromosome 9 open reading frame, human c10orf107        | C9H10orf107 | 700172 |
| Chromosome 9 open reading frame, human c10orf2          | C9H10orf2   | 710958 |
| Chromosome 9 open reading frame, human c10orf88         | C9H10orf88  | 707385 |
| Chromosome transmission fidelity factor 8               | CHTF8       | 715804 |
| Chromosome X open reading frame, human cxorf40a         | CXHXorf40A  | 702659 |
| Cilia and flagella associated protein 20                | CFAP20      | 706737 |
| Cilia and flagella associated protein 53                | CFAP53      | 700084 |
| Cilia and flagella associated protein 65                | CFAP65      | 701296 |
| Ciliary neurotrophic factor                             | CNTF        | 701907 |
| Ciliogenesis associated TTC17 interacting protein       | CATIP       | 698579 |
| Circadian associated repressor of transcription         | CIART       | 706693 |
| CKLF-like MARVEL transmembrane domain containing 6      | CMTM6       | 704441 |
| Clarín 3                                                | CLRN3       | 697496 |
| Clathrin, light chain A                                 | CLTA        | 693659 |
| Claudin 15                                              | CLDN15      | 719637 |
| Claudin 16                                              | CLDN16      | 704442 |
| Claudin 17                                              | CLDN17      | 705582 |
| Claudin 20                                              | CLDN20      | 701937 |
| Claudin 3                                               | CLDN3       | 716771 |
| Claudin domain containing 1                             | CLDND1      | 698472 |
| Clavesin 2                                              | CLVS2       | 713626 |
| Cleavage and polyadenylation factor I subunit 1         | CLP1        | 705071 |
| Cleavage and polyadenylation specific factor 1          | CPSF1       | 702082 |
| Cleavage and polyadenylation specific factor 4          | CPSF4       | 708119 |
| Cleavage stimulation factor, 3' pre-RNA, subunit 3      | CSTF3       | 694040 |
| Cleft lip and palate associated transmembrane protein 1 | CLPTM1      | 718306 |
| Clpb homolog, mitochondrial AAA ATPase chaperonin       | CLPB        | 718461 |
| CLPTM1-like                                             | CLPTM1L     | 709968 |
| Clusterin associated protein 1                          | CLUAP1      | 703676 |
| CNKSR family member 3                                   | CNKSR3      | 702627 |
| Coagulation factor XII (Hageman factor)                 | F12         | 699875 |
| Coatmer protein complex subunit beta 1                  | COPB1       | 699327 |
| Coatmer protein complex subunit epsilon                 | COPE        | 719631 |
| Coatmer protein complex subunit zeta 1                  | COPZ1       | 705176 |
| Coenzyme Q10A                                           | COQ10A      | 712341 |
| Coenzyme Q3 methyltransferase                           | COQ3        | 694215 |
| Cofilin 1 (non-muscle)                                  | CFL1        | 721882 |
| Cofilin 2 (muscle)                                      | CFL2        | 693875 |
| Coiled-coil domain containing 102B                      | CCDC102B    | 710808 |
| Coiled-coil domain containing 117                       | CCDC117     | 713804 |
| Coiled-coil domain containing 12                        | CCDC12      | 712061 |
| Coiled-coil domain containing 134                       | CCDC134     | 708713 |
| Coiled-coil domain containing 142                       | CCDC142     | 709014 |
| Coiled-coil domain containing 148                       | CCDC148     | 698322 |
| Coiled-coil domain containing 17                        | CCDC17      | 706591 |



|                                                         |         |        |
|---------------------------------------------------------|---------|--------|
| Coiled-coil domain containing 174                       | CCDC174 | 701654 |
| Coiled-coil domain containing 181                       | CCDC181 | 700803 |
| Coiled-coil domain containing 186                       | CCDC186 | 722518 |
| Coiled-coil domain containing 191                       | CCDC191 | 710219 |
| Coiled-coil domain containing 22                        | CCDC22  | 713063 |
| Coiled-coil domain containing 28A                       | CCDC28A | 703104 |
| Coiled-coil domain containing 43                        | CCDC43  | 715325 |
| Coiled-coil domain containing 59                        | CCDC59  | 698443 |
| Coiled-coil domain containing 62                        | CCDC62  | 707179 |
| Coiled-coil domain containing 69                        | CCDC69  | 713304 |
| Coiled-coil domain containing 82                        | CCDC82  | 700198 |
| Coiled-coil domain containing 86                        | CCDC86  | 695978 |
| Coiled-coil domain containing 90B                       | CCDC90B | 702035 |
| Coiled-coil domain containing 92                        | CCDC92  | 705922 |
| Coiled-coil domain containing 97                        | CCDC97  | 706342 |
| Coiled-coil-helix-coiled-coil-helix domain containing 1 | CHCHD1  | 706322 |
| Coiled-coil-helix-coiled-coil-helix domain containing 2 | CHCHD2  | 702967 |
| Coilin                                                  | COIL    | 708103 |
| Cold inducible RNA binding protein                      | CIRBP   | 706175 |
| Cold shock domain containing E1, RNA binding            | CSDE1   | 708897 |
| Colipase                                                | CLPS    | 719005 |
| Collagen triple helix repeat containing 1               | CTHRC1  | 694882 |
| Collagen, type I, alpha 2                               | COL1A2  | 700359 |
| Collagen, type III, alpha 1                             | COL3A1  | 574131 |
| Collagen, type VI, alpha 3                              | COL6A3  | 694701 |
| Collectin subfamily member 12                           | COLEC12 | 700031 |
| Colony stimulating factor 3 receptor                    | CSF3R   | 713485 |
| COMM domain containing 2                                | COMMD2  | 711498 |
| COMM domain containing 6                                | COMMD6  | 695191 |
| COMM domain containing 7                                | COMMD7  | 711628 |
| COMM domain containing 8                                | COMMD8  | 704346 |
| COMM domain containing 9                                | COMMD9  | 716992 |
| Complement component 1, q subcomponent binding protein  | C1QBP   | 711817 |
| Complement component 1, q subcomponent, C chain         | C1QC    | 708589 |
| Complement component 1, q subcomponent, C chain         | C1QC    | 708589 |
| Complement component 1, s subcomponent                  | C1S     | 714589 |
| Complement component 3a receptor 1                      | C3AR1   | 716086 |
| Complement factor properdin                             | CFP     | 707386 |
| Component of oligomeric golgi complex 1                 | COG1    | 695754 |
| Component of oligomeric golgi complex 2                 | COG2    | 714263 |
| Component of oligomeric golgi complex 3                 | COG3    | 702375 |
| Component of oligomeric golgi complex 6                 | COG6    | 697092 |
| Component of oligomeric golgi complex 7                 | COG7    | 700218 |
| Connector enhancer of kinase suppressor of Ras 1        | CNKSR1  | 714154 |
| Conserved helix-loop-helix ubiquitous kinase            | CHUK    | 709511 |
| Contactin 1                                             | CNTN1   | 574365 |
| COP9 signalosome subunit 2                              | COPS2   | 714814 |
| COP9 signalosome subunit 3                              | COPS3   | 698461 |

|                                                                                           |         |           |
|-------------------------------------------------------------------------------------------|---------|-----------|
| COP9 signalosome subunit 5                                                                | COPS5   | 704584    |
| COP9 signalosome subunit 6                                                                | COPS6   | 710667    |
| Copine I                                                                                  | CPNE1   | 100329142 |
| Copine II                                                                                 | CPNE2   | 703557    |
| Copine III                                                                                | CPNE3   | 694013    |
| Copine VIII                                                                               | CPNE8   | 696586    |
| Coproporphyrinogen oxidase                                                                | CPOX    | 698849    |
| Core-binding factor, beta subunit                                                         | CBFB    | 695767    |
| Corepressor interacting with RBPJ, 1                                                      | CIR1    | 698068    |
| Cornichon family AMPA receptor auxiliary protein 1                                        | CNIH1   | 695002    |
| Cornichon family AMPA receptor auxiliary protein 4                                        | CNIH4   | 701767    |
| Cornulin                                                                                  | CRNN    | 712894    |
| Coronin, actin binding protein, 1A                                                        | CORO1A  | 710813    |
| COX10 homolog, cytochrome c oxidase assembly protein, heme A: farnesyltransferase (yeast) | COX10   | 718301    |
| COX19 cytochrome c oxidase assembly homolog (S. Cerevisiae)                               | COX19   | 696368    |
| Craniofacial development protein 1                                                        | CFDP1   | 711343    |
| Creatine kinase, brain                                                                    | CKB     | 711167    |
| Crumbs family member 3                                                                    | CRB3    | 700086    |
| Cryptochrome circadian clock 1                                                            | CRY1    | 703752    |
| Cryptochrome circadian clock 2                                                            | CRY2    | 715000    |
| CSE1 chromosome segregation 1-like (yeast)                                                | CSE1L   | 704301    |
| C-src tyrosine kinase                                                                     | CSK     | 702868    |
| CTD phosphatase subunit 1                                                                 | CTDP1   | 698467    |
| CTD small phosphatase 2                                                                   | CTDSP2  | 715956    |
| CTD small phosphatase like 2                                                              | CTDSPL2 | 711917    |
| CTP synthase 1                                                                            | CTPS1   | 695498    |
| CTP synthase 2                                                                            | CTPS2   | 721014    |
| CTP synthase 2                                                                            | CTPS2   | 721014    |
| CTR9 homolog, Paf1/RNA polymerase II complex component                                    | CTR9    | 705748    |
| CTS telomere maintenance complex component 1                                              | CTC1    | 717075    |
| C-type lectin domain family 1, member A                                                   | CLEC1A  | 717526    |
| C-type lectin domain family 12 member A                                                   | CLEC12A | 722319    |
| CUE domain containing 2                                                                   | CUEDC2  | 713243    |
| Cullin 4A                                                                                 | CUL4A   | 714302    |
| Cullin 5                                                                                  | CUL5    | 707559    |
| Cullin 7                                                                                  | CUL7    | 699545    |
| Cullin-associated and neddylation-dissociated 1                                           | CAND1   | 716184    |
| Cutc copper transporter                                                                   | CUTC    | 709050    |
| CWC15 spliceosome-associated protein                                                      | CWC15   | 698332    |
| CWC22 homolog, spliceosome-associated protein                                             | CWC22   | 704087    |
| CWF19-like 2, cell cycle control (S. Pombe)                                               | CWF19L2 | 706825    |
| C-x(9)-C motif containing 4                                                               | CMC4    | 100423505 |
| Cyclin D binding myb-like transcription factor 1                                          | DMTF1   | 706292    |
| Cyclin D3                                                                                 | CCND3   | 695215    |
| Cyclin G1                                                                                 | CCNG1   | 697738    |
| Cyclin H                                                                                  | CCNH    | 694224    |
| Cyclin I                                                                                  | CCNI    | 677687    |

|                                                              |         |           |
|--------------------------------------------------------------|---------|-----------|
| Cyclin Pas1/PHO80 domain containing 1                        | CNPPD1  | 704271    |
| Cyclin T2                                                    | CCNT2   | 708813    |
| Cyclin T2                                                    | CCNT2   | 708813    |
| Cyclin Y                                                     | CCNY    | 698889    |
| Cyclin-dependent kinase 12                                   | CDK12   | 696733    |
| Cyclin-dependent kinase 2                                    | CDK2    | 711002    |
| Cyclin-dependent kinase 2 associated protein 2               | CDK2AP2 | 711640    |
| Cyclin-dependent kinase 4                                    | CDK4    | 715650    |
| Cyclin-dependent kinase 8                                    | CDK8    | 709761    |
| Cyclin-dependent kinase 9                                    | CDK9    | 699840    |
| Cyclin-dependent kinase inhibitor 2C (p18, inhibits CDK4)    | CDKN2C  | 711877    |
| Cyclin-dependent kinase-like 1 (CDC2-related kinase)         | CDKL1   | 705975    |
| Cystatin C                                                   | CST3    | 574313    |
| Cysteine rich hydrophobic domain 2                           | CHIC2   | 697359    |
| Cysteine-serine-rich nuclear protein 2                       | CSRNP2  | 694549    |
| CysteinyI-trna synthetase                                    | CARS    | 706502    |
| CysteinyI-trna synthetase 2, mitochondrial (putative)        | CARS2   | 694840    |
| Cystinosin, lysosomal cystine transporter                    | CTNS    | 706721    |
| Cytidine deaminase                                           | CDA     | 705913    |
| Cytidine monophosphate (UMP-CMP) kinase 1, cytosolic         | CMPK1   | 710196    |
| Cytidine monophosphate N-acetylneuraminic acid synthetase    | CMAS    | 706604    |
| Cytochrome b reductase 1                                     | CYBRD1  | 694818    |
| Cytochrome b-245 heavy chain                                 | CYBB    | 696542    |
| Cytochrome b5 reductase 4                                    | CYB5R4  | 695553    |
| Cytochrome b5 type B (outer mitochondrial membrane)          | CYB5B   | 705093    |
| Cytochrome c oxidase subunit 5A                              | COX5A   | 692061    |
| Cytochrome c oxidase subunit 6C                              | COX6C   | 100428417 |
| Cytochrome P450, family 2, subfamily D, polypeptide 6        | CYP2D6  | 678691    |
| Cytochrome P450, family 2, subfamily E, polypeptide 1        | CYP2E1  | 678688    |
| Cytochrome P450c17                                           | CYP17A1 | 678693    |
| Cytokine induced apoptosis inhibitor 1                       | CIAPIN1 | 704770    |
| Cytokine inducible SH2-containing protein                    | CISH    | 701456    |
| Cytoskeleton associated protein 5                            | CKAP5   | 714095    |
| Cytotoxic and regulatory T-cell molecule                     | CRTAM   | 707560    |
| Dachsous cadherin-related 1                                  | DCHS1   | 711938    |
| DALR anticodon binding domain containing 3                   | DALRD3  | 708403    |
| D-amino-acid oxidase                                         | DAO     | 706373    |
| DAZ associated protein 1                                     | DAZAP1  | 707132    |
| DAZ associated protein 2                                     | DAZAP2  | 695282    |
| DAZ interacting zinc finger protein 1-like                   | DZIP1L  | 716551    |
| Dcmp deaminase                                               | DCTD    | 700995    |
| DCN1, defective in cullin neddylation 1, domain containing 1 | DCUN1D1 | 708357    |
| DCN1, defective in cullin neddylation 1, domain containing 4 | DCUN1D4 | 702908    |
| DCN1, defective in cullin neddylation 1, domain containing 5 | DCUN1D5 | 704099    |
| DC-STAMP domain containing 2                                 | DCST2   | 717224    |
| Dctp pyrophosphatase 1                                       | DCTPP1  | 710500    |
| DDB1 and CUL4 associated factor 10                           | DCAF10  | 716256    |
| DDB1 and CUL4 associated factor 11                           | DCAF11  | 714867    |

|                                                             |         |           |
|-------------------------------------------------------------|---------|-----------|
| DDB1 and CUL4 associated factor 12                          | DCAF12  | 702148    |
| DDB1 and CUL4 associated factor 4                           | DCAF4   | 695337    |
| DDB1 and CUL4 associated factor 6                           | DCAF6   | 698686    |
| DDR GK domain containing 1                                  | DDR GK1 | 717226    |
| DEAD (Asp-Glu-Ala-Asp) box helicase 3, Y-linked             | DDX3Y   | 100270694 |
| DEAD (Asp-Glu-Ala-Asp) box helicase 42                      | DDX42   | 717964    |
| DEAD (Asp-Glu-Ala-Asp) box helicase 56                      | DDX56   | 698980    |
| DEAD (Asp-Glu-Ala-Asp) box polypeptide 19B                  | DDX19B  | 709576    |
| DEAD (Asp-Glu-Ala-Asp) box polypeptide 27                   | DDX27   | 703852    |
| DEAD (Asp-Glu-Ala-Asp) box polypeptide 39A                  | DDX39A  | 718822    |
| DEAD (Asp-Glu-Ala-Asp) box polypeptide 41                   | DDX41   | 700742    |
| DEAD (Asp-Glu-Ala-Asp) box polypeptide 47                   | DDX47   | 697304    |
| DEAD (Asp-Glu-Ala-Asp) box polypeptide 50                   | DDX50   | 712511    |
| DEAD/H (Asp-Glu-Ala-Asp/His) box polypeptide 26B            | DDX26B  | 709688    |
| DEAH (Asp-Glu-Ala-Asp/His) box polypeptide 57               | DHX57   | 713523    |
| DEAH (Asp-Glu-Ala-His) box helicase 30                      | DHX30   | 711178    |
| DEAH (Asp-Glu-Ala-His) box helicase 9                       | DHX9    | 715453    |
| DEAH (Asp-Glu-Ala-His) box polypeptide 29                   | DHX29   | 706306    |
| DEAH (Asp-Glu-Ala-His) box polypeptide 32                   | DHX32   | 695919    |
| DEAH (Asp-Glu-Ala-His) box polypeptide 36                   | DHX36   | 708112    |
| DEAH (Asp-Glu-Ala-His) box polypeptide 38                   | DHX38   | 709173    |
| DEAH (Asp-Glu-Ala-His) box polypeptide 40                   | DHX40   | 715202    |
| Death associated protein 3                                  | DAP3    | 719314    |
| Death effector domain containing                            | DEDD    | 719875    |
| Death inducer-obliterators 1                                | DIDO1   | 698313    |
| Death inducer-obliterators 1                                | DIDO1   | 698313    |
| Death inducer-obliterators 1                                | DIDO1   | 698313    |
| Death-associated protein                                    | DAP     | 697362    |
| Death-associated protein kinase 3                           | DAPK3   | 714221    |
| Decapping mrna 1B                                           | DCP1B   | 708089    |
| Decorin                                                     | DCN     | 709933    |
| Dedicator of cytokinesis 2                                  | DOCK2   | 704061    |
| Dedicator of cytokinesis 5                                  | DOCK5   | 711359    |
| De-etiolated homolog 1 (Arabidopsis)                        | DET1    | 697994    |
| Defender against cell death 1                               | DAD1    | 711840    |
| Dehydrodolichyl diphosphate synthase subunit                | DHDDS   | 714635    |
| Dehydrogenase/reductase (SDR family) member 1               | DHRS1   | 715933    |
| Dehydrogenase/reductase (SDR family) member 11              | DHRS11  | 713823    |
| Dehydrogenase/reductase (SDR family) member 3               | DHRS3   | 715548    |
| DEK proto-oncogene                                          | DEK     | 712460    |
| Deltex 3, E3 ubiquitin ligase                               | DTX3    | 715175    |
| DENN/MADD domain containing 2D                              | DENND2D | 702568    |
| DENN/MADD domain containing 4A                              | DENND4A | 709675    |
| DENN/MADD domain containing 5A                              | DENND5A | 707945    |
| DENN/MADD domain containing 6A                              | DENND6A | 707616    |
| Denticless E3 ubiquitin protein ligase homolog (Drosophila) | DTL     | 711236    |
| Deoxyguanosine kinase                                       | DGUOK   | 707554    |
| Deoxyhypusine hydroxylase/monooxygenase                     | DOHH    | 713046    |

|                                                                                     |         |           |
|-------------------------------------------------------------------------------------|---------|-----------|
| Deoxyhypusine synthase                                                              | DHPS    | 716213    |
| Derlin 1                                                                            | DERL1   | 703803    |
| Derlin 2                                                                            | DERL2   | 712051    |
| Desmoplakin                                                                         | DSP     | 694860    |
| Destrin (actin depolymerizing factor)                                               | DSTN    | 695969    |
| Desumoylating isopeptidase 2                                                        | DESI2   | 713515    |
| Developmentally regulated GTP binding protein 1                                     | DRG1    | 716791    |
| Dexi homolog (mouse)                                                                | DEXI    | 100430901 |
| Diacylglycerol kinase alpha                                                         | DGKA    | 710559    |
| Diacylglycerol kinase, delta 130kda                                                 | DGKD    | 714210    |
| Digeorge syndrome critical region gene 6                                            | DGCR6   | 693512    |
| Dihydrolipoamide S-succinyltransferase<br>(E2 component of 2-oxo-glutarate complex) | DLST    | 701006    |
| Dihydropyrimidine dehydrogenase                                                     | DPYD    | 715672    |
| Dihydrouridine synthase 1-like                                                      | DUS1L   | 715662    |
| Dihydrouridine synthase 2                                                           | DUS2    | 702051    |
| Dipeptidyl-peptidase 3                                                              | DPP3    | 721809    |
| Diphthamide biosynthesis 3                                                          | DPH3    | 695309    |
| DIS3 like exosome 3'-5' exoribonuclease                                             | DIS3L   | 710238    |
| Discoidin domain receptor tyrosine kinase 1                                         | DDR1    | 714233    |
| Discs, large (Drosophila) homolog-associated protein 4                              | DLGAP4  | 702928    |
| Discs, large homolog 1 (Drosophila)                                                 | DLG1    | 709572    |
| Discs, large homolog 4 (Drosophila)                                                 | DLG4    | 714273    |
| Discs, large homolog 5 (Drosophila)                                                 | DLG5    | 703123    |
| Dishevelled associated activator of morphogenesis 1                                 | DAAM1   | 701706    |
| Dishevelled segment polarity protein 1                                              | DVL1    | 705864    |
| Dishevelled segment polarity protein 2                                              | DVL2    | 714381    |
| Distal-less homeobox 5                                                              | DLX5    | 697853    |
| DMRT like family B with proline rich C-terminal 1                                   | DMRTB1  | 714424    |
| DNA (cytosine-5-)-methyltransferase 1                                               | DNMT1   | 574321    |
| DNA damage inducible transcript 3                                                   | DDIT3   | 714901    |
| DNA damage inducible transcript 4                                                   | DDIT4   | 715307    |
| DNA methyltransferase 1 associated protein 1                                        | DMAP1   | 702919    |
| Dnaj heat shock protein family (Hsp40) member A1                                    | DNAJA1  | 703765    |
| Dnaj heat shock protein family (Hsp40) member B13                                   | DNAJB13 | 720475    |
| Dnaj heat shock protein family (Hsp40) member B2                                    | DNAJB2  | 702936    |
| Dnaj heat shock protein family (Hsp40) member B4                                    | DNAJB4  | 707206    |
| Dnaj heat shock protein family (Hsp40) member B6                                    | DNAJB6  | 693305    |
| Dnaj heat shock protein family (Hsp40) member C13                                   | DNAJC13 | 717741    |
| Dnaj heat shock protein family (Hsp40) member C27                                   | DNAJC27 | 694037    |
| Dnaj heat shock protein family (Hsp40) member C3                                    | DNAJC3  | 695757    |
| Dnaj heat shock protein family (Hsp40) member C6                                    | DNAJC6  | 698682    |
| Dnaj heat shock protein family (Hsp40) member C8                                    | DNAJC8  | 720231    |
| Dnaj heat shock protein family (Hsp40) member C9                                    | DNAJC9  | 707599    |
| Docking protein 4                                                                   | DOK4    | 704443    |
| Docking protein 5                                                                   | DOK5    | 698689    |
| Dolichyl-phosphate (UDP-N-acetylglucosamine)                                        | DPAGT1  | 703538    |
| N-acetylglucosamine phosphotransferase 1 (glcnac-1-P transferase)                   |         |           |

|                                                                   |         |           |
|-------------------------------------------------------------------|---------|-----------|
| Dopey family member 1                                             | DOPEY1  | 694339    |
| Down-regulator of transcription 1                                 | DR1     | 707632    |
| Dpy-30, histone methyltransferase complex regulatory subunit      | DPY30   | 706155    |
| DR1-associated protein 1 (negative cofactor 2 alpha)              | DRAP1   | 715271    |
| Drebrin 1                                                         | DBN1    | 700375    |
| Drosha, ribonuclease type III                                     | DROSHA  | 692081    |
| DTW domain containing 1                                           | DTWD1   | 715084    |
| DTW domain containing 2                                           | DTWD2   | 697989    |
| Dual oxidase maturation factor 2                                  | DUOXA2  | 712992    |
| Dual serine/threonine and tyrosine protein kinase                 | DSTYK   | 664732    |
| Dual specificity phosphatase 11                                   | DUSP11  | 707123    |
| Dual specificity phosphatase 12                                   | DUSP12  | 720034    |
| Dual specificity phosphatase 22                                   | DUSP22  | 705824    |
| Dual specificity phosphatase 23                                   | DUSP23  | 719474    |
| Dual specificity tyrosine-(Y)-phosphorylation regulated kinase 1B | DYRK1B  | 698848    |
| Dual specificity tyrosine-(Y)-phosphorylation regulated kinase 2  | DYRK2   | 717941    |
| Dynactin subunit 1                                                | DCTN1   | 708290    |
| Dynactin subunit 2                                                | DCTN2   | 714948    |
| Dynactin subunit 4                                                | DCTN4   | 712783    |
| Dynamin 1-like                                                    | DNM1L   | 695388    |
| Dynamin 1-like                                                    | DNM1L   | 695388    |
| Dynamin 2                                                         | DNM2    | 713558    |
| Dynein, axonemal, assembly factor 2                               | DNAAF2  | 719026    |
| Dynein, axonemal, light chain 4                                   | DNAL4   | 702019    |
| Dynein, light chain, LC8-type 1                                   | DYNLL1  | 702360    |
| Dynein, light chain, LC8-type 2                                   | DYNLL2  | 100423738 |
| Dynein, light chain, roadblock-type 2                             | DYNLRB2 | 713503    |
| Dyskeratosis congenita 1, dyskerin                                | DKC1    | 702563    |
| Dystroglycan 1                                                    | DAG1    | 706179    |
| Dystrophia myotonica protein kinase                               | DMPK    | 715328    |
| E1A binding protein p300                                          | EP300   | 706258    |
| E2F transcription factor 3                                        | E2F3    | 713904    |
| E2F transcription factor 4, p107/p130-binding                     | E2F4    | 696864    |
| E2F transcription factor 5, p130-binding                          | E2F5    | 703352    |
| E2F-associated phosphoprotein                                     | EAPP    | 714727    |
| E4F transcription factor 1                                        | E4F1    | 695882    |
| E74-like factor 2 (ets domain transcription factor)               | ELF2    | 696760    |
| Ecdysoless homolog (Drosophila)                                   | ECD     | 707699    |
| Ectodysplasin A receptor                                          | EDAR    | 695059    |
| Ectonucleoside triphosphate diphosphohydrolase 4                  | ENTPD4  | 717197    |
| Ectonucleotide pyrophosphatase/phosphodiesterase 4 (putative)     | ENPP4   | 703680    |
| EF-hand and coiled-coil domain containing 1                       | EFCC1   | 706444    |
| EF-hand domain (C-terminal) containing 1                          | EFHC1   | 708517    |
| EGF-like-domain, multiple 7                                       | EGFL7   | 709840    |
| EGF-like-domain, multiple 8                                       | EGFL8   | 717145    |
| Egl-9 family hypoxia-inducible factor 1                           | EGLN1   | 713410    |
| Egl-9 family hypoxia-inducible factor 1                           | EGLN1   | 713410    |
| ELAV like neuron-specific RNA binding protein 2                   | ELAVL2  | 708195    |

|                                                              |         |        |
|--------------------------------------------------------------|---------|--------|
| Electron-transferring-flavoprotein dehydrogenase             | ETFDH   | 701207 |
| ELK1, member of ETS oncogene family                          | ELK1    | 712610 |
| Elongation factor Tu GTP binding domain containing 2         | EFTUD2  | 715512 |
| ELOVL fatty acid elongase 4                                  | ELOVL4  | 692070 |
| Embryonic ectoderm development                               | EED     | 703866 |
| Emopamil binding protein (sterol isomerase)                  | EBP     | 714315 |
| Empty spiracles homeobox 2                                   | EMX2    | 701370 |
| Endonuclease domain containing 1                             | ENDOD1  | 699210 |
| Endoplasmic reticulum lectin 1                               | ERLEC1  | 716460 |
| Endosulfine alpha                                            | ENSA    | 715857 |
| Endothelin receptor type A                                   | EDNRA   | 704135 |
| Engulfment and cell motility 2                               | ELMO2   | 707316 |
| Enhancer of mrna decapping 3                                 | EDC3    | 709182 |
| Enhancer of polycomb homolog 2 (Drosophila)                  | EPC2    | 721916 |
| Enhancer of rudimentary homolog (Drosophila)                 | ERH     | 712507 |
| Enolase 2 (gamma, neuronal)                                  | ENO2    | 714208 |
| Enolase superfamily member 1                                 | ENOSF1  | 697333 |
| Enoyl-coa delta isomerase 2                                  | ECI2    | 709579 |
| EP300 interacting inhibitor of differentiation 2             | EID2    | 717578 |
| Ephrin-B1                                                    | EFNB1   | 694149 |
| Epidermal growth factor receptor pathway substrate 15-like 1 | EPS15L1 | 719502 |
| Epithelial cell transforming 2                               | ECT2    | 694056 |
| EPS8 like 1                                                  | EPS8L1  | 698281 |
| ER lipid raft associated 1                                   | ERLIN1  | 709596 |
| ER membrane protein complex subunit 1                        | EMC1    | 702573 |
| ER membrane protein complex subunit 2                        | EMC2    | 697878 |
| ER membrane protein complex subunit 4                        | EMC4    | 695907 |
| ERGIC and golgi 3                                            | ERGIC3  | 704736 |
| Erythrocyte membrane protein band 4.1-like 1                 | EPB41L1 | 710697 |
| Esterase D                                                   | ESD     | 708871 |
| Estrogen receptor binding site associated, antigen, 9        | EBAG9   | 699305 |
| Ethylmalonic encephalopathy 1                                | ETHE1   | 718089 |
| Ethylmalonyl-coa decarboxylase 1                             | ECHDC1  | 712072 |
| Etoposide induced 2.4                                        | EI24    | 713226 |
| Eukaryotic translation elongation factor 1 beta 2            | EEF1B2  | 707019 |
| Eukaryotic translation elongation factor 1 epsilon 1         | EEF1E1  | 695426 |
| Eukaryotic translation elongation factor 1 gamma             | EEF1G   | 722274 |
| Eukaryotic translation initiation factor 1                   | EIF1    | 704606 |
| Eukaryotic translation initiation factor 2 subunit beta      | EIF2S2  | 708593 |
| Eukaryotic translation initiation factor 2A, 65kda           | EIF2A   | 710497 |
| Eukaryotic translation initiation factor 2-alpha kinase 3    | EIF2AK3 | 699575 |
| Eukaryotic translation initiation factor 2B subunit beta     | EIF2B2  | 701360 |
| Eukaryotic translation initiation factor 2B subunit epsilon  | EIF2B5  | 703673 |
| Eukaryotic translation initiation factor 2B subunit gamma    | EIF2B3  | 705862 |
| Eukaryotic translation initiation factor 3 subunit D         | EIF3D   | 695051 |
| Eukaryotic translation initiation factor 3 subunit F         | EIF3F   | 706269 |
| Eukaryotic translation initiation factor 3 subunit G         | EIF3G   | 714726 |
| Eukaryotic translation initiation factor 3 subunit H         | EIF3H   | 700517 |

|                                                                     |           |           |
|---------------------------------------------------------------------|-----------|-----------|
| Eukaryotic translation initiation factor 3 subunit K                | EIF3K     | 693536    |
| Eukaryotic translation initiation factor 3 subunit L                | EIF3L     | 699189    |
| Eukaryotic translation initiation factor 3 subunit M                | EIF3M     | 695698    |
| Eukaryotic translation initiation factor 4 gamma, 2                 | EIF4G2    | 705510    |
| Eukaryotic translation initiation factor 4E binding protein 2       | EIF4EBP2  | 100424761 |
| Eukaryotic translation initiation factor 4E binding protein 3       | EIF4EBP3  | 100532740 |
| Eukaryotic translation initiation factor 4E family member 2         | EIF4E2    | 713487    |
| Eukaryotic translation initiation factor 4E nuclear import factor 1 | EIF4ENIF1 | 716871    |
| Eukaryotic translation initiation factor 4H                         | EIF4H     | 693429    |
| Eukaryotic translation initiation factor 5B                         | EIF5B     | 714129    |
| Eukaryotic translation termination factor 1                         | ETF1      | 714449    |
| EWS RNA binding protein 1                                           | EWSR1     | 714432    |
| Excision repair cross-complementation group 3                       | ERCC3     | 698829    |
| Exocyst complex component 1                                         | EXOC1     | 695664    |
| Exocyst complex component 2                                         | EXOC2     | 706296    |
| Exocyst complex component 4                                         | EXOC4     | 712458    |
| Exosome component 10                                                | EXOSC10   | 714153    |
| Exosome component 8                                                 | EXOSC8    | 695071    |
| Exostosin glycosyltransferase 1                                     | EXT1      | 701488    |
| Exostosin glycosyltransferase 2                                     | EXT2      | 715975    |
| Exostosin-like glycosyltransferase 2                                | EXTL2     | 712189    |
| Exportin 1                                                          | XPO1      | 718063    |
| Extended synaptotagmin-like protein 1                               | ESYT1     | 711720    |
| Extended synaptotagmin-like protein 2                               | ESYT2     | 693942    |
| F11 receptor                                                        | F11R      | 719824    |
| F11 receptor                                                        | F11R      | 719824    |
| F11 receptor                                                        | F11R      | 719824    |
| FAD-dependent oxidoreductase domain containing 1                    | FOXRED1   | 714271    |
| Failed axon connections homolog                                     | FAXC      | 693945    |
| Family with sequence similarity 103 member A1                       | FAM103A1  | 714660    |
| Family with sequence similarity 104 member A                        | FAM104A   | 695865    |
| Family with sequence similarity 110 member A                        | FAM110A   | 717055    |
| Family with sequence similarity 118 member B                        | FAM118B   | 714323    |
| Family with sequence similarity 127, member A                       | FAM127A   | 708766    |
| Family with sequence similarity 134 member A                        | FAM134A   | 704378    |
| Family with sequence similarity 156 member B                        | FAM156B   | 698392    |
| Family with sequence similarity 175 member B                        | FAM175B   | 694886    |
| Family with sequence similarity 178 member B                        | FAM178B   | 710890    |
| Family with sequence similarity 179 member B                        | FAM179B   | 702188    |
| Family with sequence similarity 181 member B                        | FAM181B   | 701184    |
| Family with sequence similarity 186 member B                        | FAM186B   | 711001    |
| Family with sequence similarity 188 member A                        | FAM188A   | 699009    |
| Family with sequence similarity 199, X-linked                       | FAM199X   | 699523    |
| Family with sequence similarity 206 member A                        | FAM206A   | 710486    |
| Family with sequence similarity 219 member A                        | FAM219A   | 700651    |
| Family with sequence similarity 220 member A                        | FAM220A   | 703785    |
| Family with sequence similarity 222 member B                        | FAM222B   | 710302    |
| Family with sequence similarity 234 member A                        | FAM234A   | 694729    |



|                                                    |          |        |
|----------------------------------------------------|----------|--------|
| Family with sequence similarity 3 member A         | FAM3A    | 701159 |
| Family with sequence similarity 3 member B         | FAM3B    | 722516 |
| Family with sequence similarity 35 member A        | FAM35A   | 694102 |
| Family with sequence similarity 45 member A        | FAM45A   | 713269 |
| Family with sequence similarity 49 member B        | FAM49B   | 695449 |
| Family with sequence similarity 53 member C        | FAM53C   | 714176 |
| Family with sequence similarity 58 member A        | FAM58A   | 695925 |
| Family with sequence similarity 71 member C        | FAM71C   | 694296 |
| Family with sequence similarity 73 member B        | FAM73B   | 722577 |
| Family with sequence similarity 8 member A1        | FAM8A1   | 703789 |
| Family with sequence similarity 83 member A        | FAM83A   | 704023 |
| Family with sequence similarity 89 member B        | FAM89B   | 721925 |
| Family with sequence similarity 92 member A1       | FAM92A1  | 698794 |
| Fanconi anemia complementation group B             | FANCB    | 712083 |
| Fanconi anemia complementation group E             | FANCE    | 718889 |
| Fanconi anemia complementation group G             | FANCG    | 698837 |
| Fanconi anemia complementation group I             | FANCI    | 699878 |
| Fanconi anemia core complex associated protein 100 | FAAP100  | 713876 |
| Far upstream element (FUSE) binding protein 3      | FUBP3    | 722470 |
| Farnesyltransferase, CAAX box, beta                | FNTB     | 708129 |
| Fas (TNFRSF6) associated factor 1                  | FAF1     | 714405 |
| Fatty acyl coa reductase 1                         | FAR1     | 699947 |
| FBJ murine osteosarcoma viral oncogene homolog     | FOS      | 702077 |
| F-box and leucine-rich repeat protein 6            | FBXL6    | 701594 |
| F-box and WD repeat domain containing 7            | FBXW7    | 695101 |
| F-box and WD repeat domain containing 7            | FBXW7    | 695101 |
| F-box and WD repeat domain containing 9            | FBXW9    | 716383 |
| F-box protein 11                                   | FBXO11   | 715651 |
| F-box protein 15                                   | FBXO15   | 694446 |
| F-box protein 21                                   | FBXO21   | 693647 |
| F-box protein 3                                    | FBXO3    | 693281 |
| F-box protein 30                                   | FBXO30   | 699241 |
| F-box protein 31                                   | FBXO31   | 695313 |
| F-box protein 33                                   | FBXO33   | 699629 |
| F-box protein 34                                   | FBXO34   | 697537 |
| F-box protein 4                                    | FBXO4    | 697007 |
| F-box protein 6                                    | FBXO6    | 722740 |
| F-box protein 7                                    | FBXO7    | 717317 |
| F-box protein 8                                    | FBXO8    | 699302 |
| F-box protein 9                                    | FBXO9    | 712024 |
| Fc fragment of igg, receptor, transporter, alpha   | FCGRT    | 718859 |
| Fc receptor-like B                                 | FCRLB    | 720028 |
| FCH and double SH3 domains 2                       | FCHSD2   | 717996 |
| Fem-1 homolog b (C. Elegans)                       | FEM1B    | 693955 |
| Fermitin family member 3                           | FERMT3   | 722120 |
| Fermitin family member 3                           | FERMT3   | 722120 |
| Ferritin mitochondrial                             | FTMT     | 699743 |
| FGFR1 oncogene partner 2                           | FGFR1OP2 | 708905 |

|                                                                                |        |           |
|--------------------------------------------------------------------------------|--------|-----------|
| Fibrillarin                                                                    | FBL    | 700286    |
| Fibroblast growth factor 20                                                    | FGF20  | 701847    |
| Fibroblast growth factor receptor 1                                            | FGFR1  | 700126    |
| Fibulin 2                                                                      | FBLN2  | 100429735 |
| Ficolin 2                                                                      | FCN2   | 712486    |
| FIG4 phosphoinositide 5-phosphatase                                            | FIG4   | 699914    |
| Filamin A, alpha                                                               | FLNA   | 699524    |
| Filamin B, beta                                                                | FLNB   | 702732    |
| Filamin binding LIM protein 1                                                  | FBLIM1 | 695727    |
| Finkel-Biskis-Reilly murine sarcoma virus (FBR-musv)<br>ubiquitously expressed | FAU    | 716761    |
| FK506 binding protein 10                                                       | FKBP10 | 707881    |
| FK506 binding protein 11                                                       | FKBP11 | 708598    |
| FK506 binding protein 8                                                        | FKBP8  | 720232    |
| FK506 binding protein 9                                                        | FKBP9  | 708827    |
| FK506 binding protein 9                                                        | FKBP9  | 708827    |
| Flightless I actin binding protein                                             | FLII   | 700471    |
| Flotillin 2                                                                    | FLOT2  | 716527    |
| Folate receptor 2 (fetal)                                                      | FOLR2  | 718405    |
| Follicular dendritic cell secreted protein                                     | FDCSP  | 707784    |
| Folliculogenesis specific bhlh transcription factor                            | FIGLA  | 710606    |
| Follistatin                                                                    | FST    | 707420    |
| Follistatin like 1                                                             | FSTL1  | 713367    |
| Forkhead box O3                                                                | FOXO3  | 700731    |
| Forkhead box R2                                                                | FOXR2  | 704032    |
| Four and a half LIM domains 2                                                  | FHL2   | 713222    |
| Four and a half LIM domains 3                                                  | FHL3   | 715313    |
| FRAS1 related extracellular matrix 1                                           | FREM1  | 713874    |
| Frizzled class receptor 6                                                      | FZD6   | 694625    |
| Fructosamine 3 kinase related protein                                          | FN3KRP | 716431    |
| Ftsj RNA methyltransferase homolog 1 (E. Coli)                                 | FTSJ1  | 710243    |
| Fucokinase                                                                     | FUK    | 709226    |
| Fucosyltransferase 8 (alpha (1,6) fucosyltransferase)                          | FUT8   | 708839    |
| Fumarylacetoacetate hydrolase (fumarylacetoacetase)                            | FAH    | 712716    |
| FUN14 domain containing 1                                                      | FUNDC1 | 709370    |
| Fuzzy planar cell polarity protein                                             | FUZ    | 719442    |
| FXYP domain containing ion transport regulator 7                               | FXYP7  | 718457    |
| FYN proto-oncogene, Src family tyrosine kinase                                 | FYN    | 574214    |
| G elongation factor, mitochondrial 1                                           | GFM1   | 706456    |
| G elongation factor, mitochondrial 2                                           | GFM2   | 704247    |
| G kinase anchoring protein 1                                                   | GKAP1  | 708816    |
| G protein pathway suppressor 1                                                 | GPS1   | 719343    |
| G protein-coupled bile acid receptor 1                                         | GPBAR1 | 697937    |
| G protein-coupled receptor 1                                                   | GPR1   | 707120    |
| G protein-coupled receptor 12                                                  | GPR12  | 710030    |
| G protein-coupled receptor 137                                                 | GPR137 | 717722    |
| G protein-coupled receptor 141                                                 | GPR141 | 705700    |
| G protein-coupled receptor 182                                                 | GPR182 | 713866    |

|                                                                 |           |        |
|-----------------------------------------------------------------|-----------|--------|
| G protein-coupled receptor 19                                   | GPR19     | 697072 |
| G protein-coupled receptor 31                                   | GPR31     | 717158 |
| G protein-coupled receptor 50                                   | GPR50     | 703817 |
| G protein-coupled receptor 89A                                  | GPR89A    | 696579 |
| G protein-coupled receptor kinase 7                             | GRK7      | 714916 |
| G protein-coupled receptor kinase interacting arfgap 2          | GIT2      | 708092 |
| G protein-coupled receptor, class C, group 5, member B          | GPRC5B    | 695204 |
| G protein-coupled receptor, class C, group 5, member D          | GPRC5D    | 698898 |
| G2/M-phase specific E3 ubiquitin protein ligase                 | G2E3      | 717021 |
| GA binding protein transcription factor, beta subunit 1         | GABPB1    | 715334 |
| GABA(A) receptor-associated protein like 2                      | GABARAPL2 | 714413 |
| Galactosidase alpha                                             | GLA       | 703129 |
| Galactosylceramidase                                            | GALC      | 693322 |
| Gametogenetin binding protein 2                                 | GGNBP2    | 713750 |
| Gamma-aminobutyric acid (GABA) B receptor, 1                    | GABBR1    | 708987 |
| Gamma-glutamylcyclotransferase                                  | GGCT      | 695547 |
| Gamma-glutamyltransferase 5                                     | GGT5      | 720345 |
| Ganglioside induced differentiation associated protein 2        | GDAP2     | 705994 |
| Gastrulation brain homeobox 2                                   | GBX2      | 693901 |
| GC-rich promoter binding protein 1                              | GPBP1     | 708322 |
| GC-rich promoter binding protein 1-like 1                       | GPBP1L1   | 706690 |
| GDP dissociation inhibitor 2                                    | GDI2      | 712510 |
| GDP-mannose 4,6-dehydratase                                     | GMD5      | 707051 |
| Gem nuclear organelle associated protein 4                      | GEMIN4    | 699841 |
| Gem nuclear organelle associated protein 5                      | GEMIN5    | 714864 |
| General transcription factor IIA 2                              | GTF2A2    | 702984 |
| General transcription factor IIB                                | GTF2B     | 694770 |
| General transcription factor IIE subunit 2                      | GTF2E2    | 694622 |
| General transcription factor IIH subunit 4                      | GTF2H4    | 714285 |
| General transcription factor IIH subunit 5                      | GTF2H5    | 700107 |
| General transcription factor iii                                | GTF2I     | 574269 |
| General transcription factor IIIA                               | GTF3A     | 710492 |
| General transcription factor IIIC subunit 3                     | GTF3C3    | 696338 |
| General transcription factor IIIC subunit 4                     | GTF3C4    | 714849 |
| General transcription factor IIIC subunit 6                     | GTF3C6    | 696512 |
| Germinal center-associated, signaling and motility              | GCSAM     | 707891 |
| GID complex subunit 4 homolog                                   | GID4      | 699842 |
| GID complex subunit 8                                           | GID8      | 698189 |
| GIN5 complex subunit 2 (Psf2 homolog)                           | GIN5      | 693426 |
| GLE1, RNA export mediator                                       | GLE1      | 717474 |
| Glucagon-like peptide 2 receptor                                | GLP2R     | 717783 |
| Glucose 6 phosphatase, catalytic, 3                             | G6PC3     | 714276 |
| Glucose-6-phosphate dehydrogenase                               | G6PD      | 701137 |
| Glucose-fructose oxidoreductase domain containing 1             | GFOD1     | 700607 |
| Glucose-fructose oxidoreductase domain containing 2             | GFOD2     | 699723 |
| Glucosidase, beta (bile acid) 2                                 | GBA2      | 696062 |
| Glutamate receptor, ionotropic, kainate 1                       | GRIK1     | 705699 |
| Glutamate receptor, ionotropic, N-methyl D-aspartate-associated | GRINA     | 708234 |

|                                                                             |         |           |
|-----------------------------------------------------------------------------|---------|-----------|
| protein 1 (glutamate binding)                                               |         |           |
| Glutamate-ammonia ligase                                                    | GLUL    | 715952    |
| Glutamic-oxaloacetic transaminase 2                                         | GOT2    | 707896    |
| Glutaminase                                                                 | GLS     | 693520    |
| Glutaminyl-trna synthetase                                                  | QARS    | 708111    |
| Glutaredoxin                                                                | GLRX    | 698997    |
| Glutaredoxin 5                                                              | GLRX5   | 702989    |
| Glutaryl-coa dehydrogenase                                                  | GCDH    | 716935    |
| Glutathione S-transferase alpha 4                                           | GSTA4   | 709666    |
| Glutathione S-transferase kappa 1                                           | GSTK1   | 704240    |
| Glutathione S-transferase omega 1                                           | GSTO1   | 716078    |
| Glutathione S-transferase pi 1                                              | GSTP1   | 721704    |
| Glyceraldehyde-3-phosphate dehydrogenase                                    | GAPDH   | 574353    |
| Glycerol-3-phosphate acyltransferase 4                                      | GPAT4   | 710363    |
| Glycogen synthase 2                                                         | GYS2    | 706152    |
| Glycogen synthase kinase 3 alpha                                            | GSK3A   | 707037    |
| Glycophorin C (Gerbich blood group)                                         | GYPC    | 712092    |
| Glycosylated lysosomal membrane protein                                     | GLMP    | 719468    |
| Glycosylphosphatidylinositol anchor attachment 1                            | GPAA1   | 699887    |
| Glycosyltransferase 8 domain containing 1                                   | GLT8D1  | 695999    |
| Glycosyltransferase like domain containing 1                                | GTDC1   | 100424583 |
| Glyoxalase I                                                                | GLO1    | 719518    |
| Golgi apparatus membrane protein TVP23 homolog B                            | TVP23B  | 677707    |
| Golgi reassembly stacking protein 2                                         | GORASP2 | 694170    |
| Golgi SNAP receptor complex member 2                                        | GOSR2   | 716841    |
| Golgi-associated, gamma adaptin ear containing, ARF binding protein 1       | GGA1    | 697929    |
| Golgi-associated, gamma adaptin ear containing, ARF binding protein 3       | GGA3    | 705751    |
| Golgin A4                                                                   | GOLGA4  | 697455    |
| Golgin A7                                                                   | GOLGA7  | 709911    |
| Golgin B1                                                                   | GOLGB1  | 713993    |
| Golgin, RAB6-interacting                                                    | GORAB   | 702571    |
| Grancalcin                                                                  | GCA     | 702138    |
| GRB2-related adaptor protein                                                | GRAP    | 702473    |
| GRIP and coiled-coil domain containing 1                                    | GCC1    | 697975    |
| Group-specific component (vitamin D binding protein)                        | GC      | 705708    |
| Growth arrest and DNA damage inducible alpha                                | GADD45A | 701054    |
| Growth arrest and DNA damage inducible gamma                                | GADD45G | 697835    |
| Growth arrest specific 8                                                    | GAS8    | 701458    |
| Growth associated protein 43                                                | GAP43   | 711260    |
| Growth differentiation factor 3                                             | GDF3    | 715605    |
| Growth factor receptor bound protein 10                                     | GRB10   | 694786    |
| GRP1 (general receptor for phosphoinositides 1)-associated scaffold protein | GRASP   | 696547    |
| Grpe-like 1, mitochondrial (E. Coli)                                        | GRPEL1  | 709772    |
| GS homeobox 2                                                               | GSX2    | 697240    |
| Gse1 coiled-coil protein                                                    | GSE1    | 693298    |

|                                                                              |          |           |
|------------------------------------------------------------------------------|----------|-----------|
| GTF2I repeat domain containing 1                                             | GTF2IRD1 | 693935    |
| Gtpase activating protein (SH3 domain) binding protein 1                     | G3BP1    | 713884    |
| Gtpase, IMAP family member 1                                                 | GIMAP1   | 100424486 |
| Guanidinoacetate N-methyltransferase                                         | GAMT     | 721263    |
| Guanine nucleotide binding protein (G protein),<br>alpha 11 (Gq class)       | GNA11    | 721649    |
| Guanine nucleotide binding protein (G protein),<br>beta polypeptide 1        | GNB1     | 703399    |
| Guanine nucleotide binding protein (G protein),<br>beta polypeptide 2-like 1 | GNB2L1   | 708526    |
| Guanine nucleotide binding protein (G protein), gamma 10                     | GNG10    | 708193    |
| Guanine nucleotide binding protein (G protein), gamma 11                     | GNG11    | 700606    |
| Guanine nucleotide binding protein-like 3 (nucleolar)                        | GNL3     | 695877    |
| Guanosine monophosphate reductase 2                                          | GMPR2    | 715719    |
| Guanylate cyclase activator 1B                                               | GUCA1B   | 695658    |
| Guanylate kinase 1                                                           | GUK1     | 695272    |
| H2.0-like homeobox                                                           | HLX      | 705298    |
| H2A histone family, member X                                                 | H2AFX    | 703073    |
| H2A histone family, member Y                                                 | H2AFY    | 711836    |
| H2A histone family, member Z                                                 | H2AFZ    | 709326    |
| Haloacid dehalogenase like hydrolase domain containing 2                     | HDHD2    | 697216    |
| HAUS augmin like complex subunit 8                                           | HAUS8    | 718874    |
| HCLS1 binding protein 3                                                      | HS1BP3   | 702364    |
| Hdc homolog, cell cycle regulator                                            | HECA     | 702628    |
| HEAT repeat containing 6                                                     | HEATR6   | 720089    |
| Heat shock factor binding protein 1                                          | HSBP1    | 714498    |
| Heat shock protein 90kda alpha (cytosolic), class A member 1                 | HSP90AA1 | 708431    |
| Heat shock protein 90kda alpha family class B member 1                       | HSP90AB1 | 702293    |
| Heat shock protein family A (Hsp70) member 8                                 | HSPA8    | 707989    |
| Heat shock protein family B (small) member 11                                | HSPB11   | 714791    |
| Heat shock protein family D (Hsp60) member 1                                 | HSPD1    | 698024    |
| Heat shock protein family H (Hsp110) member 1                                | HSPH1    | 721956    |
| Heat shock transcription factor 2                                            | HSF2     | 713938    |
| HECT and RLD domain containing E3 ubiquitin protein ligase 3                 | HERC3    | 703108    |
| HECT domain containing E3 ubiquitin protein ligase 1                         | HECTD1   | 717177    |
| HECT domain containing E3 ubiquitin protein ligase 2                         | HECTD2   | 697258    |
| HECT domain containing E3 ubiquitin protein ligase 3                         | HECTD3   | 705051    |
| Helicase, lymphoid-specific                                                  | HELLS    | 701598    |
| Hematological and neurological expressed 1                                   | HN1      | 664729    |
| Hematological and neurological expressed 1-like                              | HN1L     | 702283    |
| Hematopoietic cell-specific Lyn substrate 1                                  | HCLS1    | 714044    |
| Hematopoietic prostaglandin D synthase                                       | HPGDS    | 705227    |
| Heme binding protein 2                                                       | HEBP2    | 709176    |
| Heme oxygenase 2                                                             | HMOX2    | 705461    |
| Hemogen                                                                      | HEMGN    | 715562    |
| Hemoglobin subunit alpha 1                                                   | HBA1     | 701930    |
| Hemoglobin subunit epsilon 1                                                 | HBE1     | 715414    |
| Hemoglobin, beta                                                             | HBB      | 715559    |

|                                                                                                |           |           |
|------------------------------------------------------------------------------------------------|-----------|-----------|
| HEN1 methyltransferase homolog 1 (Arabidopsis)                                                 | HENMT1    | 698896    |
| Hepatocyte growth factor-regulated tyrosine kinase substrate                                   | HGS       | 714385    |
| Hepcidin antimicrobial peptide                                                                 | HAMP      | 708397    |
| Hermansky-Pudlak syndrome 6                                                                    | HPS6      | 712574    |
| Hes-related family bhlh transcription factor with YRPW motif 2                                 | HEY2      | 712988    |
| Heterogeneous nuclear ribonucleoprotein A/B                                                    | HNRNPAB   | 702509    |
| Heterogeneous nuclear ribonucleoprotein A2/B1                                                  | HNRNPA2B1 | 701821    |
| Heterogeneous nuclear ribonucleoprotein C (C1/C2)                                              | HNRNPC    | 706423    |
| Heterogeneous nuclear ribonucleoprotein F                                                      | HNRNPF    | 717668    |
| Heterogeneous nuclear ribonucleoprotein H2 (H')                                                | HNRNPH2   | 703254    |
| Heterogeneous nuclear ribonucleoprotein L                                                      | HNRNPL    | 694448    |
| Heterogeneous nuclear ribonucleoprotein L-like                                                 | HNRNPLL   | 710841    |
| Heterogeneous nuclear ribonucleoprotein R                                                      | HNRNPR    | 718721    |
| Hexamethylene bis-acetamide inducible 1                                                        | HEXIM1    | 716006    |
| Hexokinase 1                                                                                   | HK1       | 711922    |
| Hexosaminidase (glycosyl hydrolase family 20, catalytic domain) containing                     | HEXDC     | 716128    |
| HIG1 hypoxia inducible domain family member 2A                                                 | HIGD2A    | 696888    |
| High mobility group 20A                                                                        | HMG20A    | 714893    |
| High mobility group box 1                                                                      | HMGB1     | 712849    |
| High mobility group nucleosomal binding domain 4                                               | HMGN4     | 698039    |
| HIRA interacting protein 3                                                                     | HIRIP3    | 708004    |
| Histidine triad nucleotide binding protein 2                                                   | HINT2     | 695521    |
| Histidyl-trna synthetase 2                                                                     | HARS2     | 697009    |
| Histocompatibility (minor) 13                                                                  | HM13      | 713216    |
| Histone acetyltransferase 1                                                                    | HAT1      | 695933    |
| Histone cluster 2, h3d                                                                         | HIST2H3D  | 696204    |
| Histone deacetylase 3                                                                          | HDAC3     | 704467    |
| Histone deacetylase 5                                                                          | HDAC5     | 711456    |
| Histone deacetylase 8                                                                          | HDAC8     | 699642    |
| Histone H4 transcription factor                                                                | HINFP     | 703763    |
| HIV-1 Tat specific factor 1                                                                    | HTATSF1   | 693589    |
| HNF1 homeobox B                                                                                | HNF1B     | 714540    |
| Homeobox D12                                                                                   | HOXD12    | 100428778 |
| Homeodomain interacting protein kinase 1                                                       | HIPK1     | 707856    |
| Homocysteine-inducible, endoplasmic reticulum stress-inducible, ubiquitin-like domain member 1 | HERPUD1   | 703210    |
| Host cell factor C2                                                                            | HCFC2     | 700316    |
| HRAS like suppressor family member 5                                                           | HRASLS5   | 718317    |
| Hscb mitochondrial iron-sulfur cluster co-chaperone                                            | HSCB      | 713734    |
| Htra serine peptidase 1                                                                        | HTRA1     | 705855    |
| Human immunodeficiency virus type I enhancer binding protein 2                                 | HIVEP2    | 701340    |
| Hyaluronan and proteoglycan link protein 3                                                     | HAPLN3    | 698880    |
| Hyaluronan binding protein 4                                                                   | HABP4     | 710213    |
| Hyaluronoglucosaminidase 2                                                                     | HYAL2     | 702484    |
| Hydroxyacyl-coa dehydrogenase                                                                  | HADH      | 696181    |
| Hydroxyacylglutathione hydrolase-like                                                          | HAGHL     | 697846    |
| Hydroxymethylbilane synthase                                                                   | HMBS      | 702943    |

|                                                                            |          |           |
|----------------------------------------------------------------------------|----------|-----------|
| Hydroxysteroid (17-beta) dehydrogenase 10                                  | HSD17B10 | 700018    |
| Hydroxysteroid dehydrogenase like 2                                        | HSDL2    | 707233    |
| Hyperpolarization activated cyclic nucleotide gated potassium channel 3    | HCN3     | 717719    |
| Hypoxia inducible lipid droplet-associated                                 | HILPDA   | 701261    |
| Iduronidase, alpha-L-                                                      | IDUA     | 106998222 |
| Iga-inducing protein                                                       | IGIP     | 100423854 |
| IKAROS family zinc finger 3                                                | IKZF3    | 698083    |
| Immediate early response 3                                                 | IER3     | 701939    |
| Immediate early response 3                                                 | IER3     | 701939    |
| IMP (inosine 5'-monophosphate) dehydrogenase 1                             | IMPDH1   | 701039    |
| IMP (inosine 5'-monophosphate) dehydrogenase 2                             | IMPDH2   | 708307    |
| IMP3, U3 small nucleolar ribonucleoprotein                                 | IMP3     | 706202    |
| Importin 5                                                                 | IPO5     | 697448    |
| Importin 9                                                                 | IPO9     | 707210    |
| Increased sodium tolerance 1 homolog (yeast)                               | IST1     | 707245    |
| Inhibin alpha                                                              | INHA     | 574379    |
| Inhibitor of DNA binding 1, dominant negative helix-loop-helix protein     | ID1      | 713160    |
| Inhibitor of growth family member 2                                        | ING2     | 701839    |
| Inhibitor of growth family member 4                                        | ING4     | 722073    |
| Inhibitor of kappa light polypeptide gene enhancer in B-cells, kinase beta | IKBKB    | 704683    |
| INO80 complex subunit C                                                    | INO80C   | 708819    |
| Inositol monophosphatase domain containing 1                               | IMPAD1   | 696893    |
| Inositol polyphosphate-1-phosphatase                                       | INPP1    | 703301    |
| Inositol polyphosphate-5-phosphatase K                                     | INPP5K   | 721222    |
| Inositol-3-phosphate synthase 1                                            | ISYNA1   | 719487    |
| Inositol-tetrakisphosphate 1-kinase                                        | ITPK1    | 698756    |
| Insulin like 3                                                             | INSL3    | 100533194 |
| Insulin like 6                                                             | INSL6    | 693735    |
| Insulin like growth factor binding protein 3                               | IGFBP3   | 696868    |
| Insulin like growth factor binding protein 4                               | IGFBP4   | 700963    |
| Insulin-degrading enzyme                                                   | IDE      | 698640    |
| Integrator complex subunit 12                                              | INTS12   | 694344    |
| Integrator complex subunit 2                                               | INTS2    | 712351    |
| Integrator complex subunit 5                                               | INTS5    | 719124    |
| Integrator complex subunit 7                                               | INTS7    | 711152    |
| Integrator complex subunit 8                                               | INTS8    | 700255    |
| Integrin alpha FG-GAP repeat containing 1                                  | ITFG1    | 716435    |
| Integrin linked kinase                                                     | ILK      | 709944    |
| Integrin subunit alpha 10                                                  | ITGA10   | 100428484 |
| Integrin subunit alpha 2b                                                  | ITGA2B   | 714955    |
| Integrin subunit alpha V                                                   | ITGAV    | 707756    |
| Integrin subunit beta like 1                                               | ITGBL1   | 700965    |
| Integrin-binding sialoprotein                                              | IBSP     | 701835    |
| Intercellular adhesion molecule 4 (Landsteiner-Wiener blood group)         | ICAM4    | 712354    |
| Interferon gamma receptor 1                                                | IFNGR1   | 100423877 |

|                                                         |         |        |
|---------------------------------------------------------|---------|--------|
| Interferon regulatory factor 1                          | IRF1    | 707788 |
| Interferon regulatory factor 2                          | IRF2    | 694347 |
| Interferon regulatory factor 2 binding protein 1        | IRF2BP1 | 715611 |
| Interferon, alpha 2                                     | IFNA2   | 709948 |
| Interferon, gamma-inducible protein 16                  | IFI16   | 719253 |
| Interleukin 21 receptor                                 | IL21R   | 705759 |
| Interleukin 22                                          | IL22    | 718047 |
| Interleukin 27 receptor subunit alpha                   | IL27RA  | 717549 |
| Interleukin 6 signal transducer                         | IL6ST   | 574127 |
| Interleukin 6 signal transducer                         | IL6ST   | 574127 |
| Interleukin enhancer binding factor 3                   | ILF3    | 713427 |
| Intraflagellar transport 172                            | IFT172  | 700948 |
| Intraflagellar transport 20                             | IFT20   | 715773 |
| Intraflagellar transport 22                             | IFT22   | 714551 |
| Intraflagellar transport 27                             | IFT27   | 697032 |
| Intraflagellar transport 46                             | IFT46   | 700582 |
| Intraflagellar transport 52                             | IFT52   | 694933 |
| Intraflagellar transport 57                             | IFT57   | 705088 |
| Intraflagellar transport 74                             | IFT74   | 707561 |
| Intraflagellar transport 80                             | IFT80   | 705146 |
| Intraflagellar transport 81                             | IFT81   | 710434 |
| Inturned planar cell polarity protein                   | INTU    | 709967 |
| IQ motif and Sec7 domain 1                              | IQSEC1  | 693922 |
| IQ motif containing B1                                  | IQCB1   | 715032 |
| IQ motif containing K                                   | IQCK    | 695417 |
| IQ motif containing with AAA domain 1                   | IQCA1   | 694173 |
| Iron-sulfur cluster assembly enzyme                     | ISCU    | 705669 |
| Islet cell autoantigen 1                                | ICA1    | 695889 |
| Isocitrate dehydrogenase 2 (NADP+), mitochondrial       | IDH2    | 701480 |
| Isocitrate dehydrogenase 3 (NAD+) alpha                 | IDH3A   | 677715 |
| Isocitrate dehydrogenase 3 (NAD+) gamma                 | IDH3G   | 698558 |
| Isoleucyl-trna synthetase                               | IARS    | 677705 |
| IWS1 homolog (S. Cerevisiae)                            | IWS1    | 699205 |
| Jagged 1                                                | JAG1    | 718580 |
| JNK1/MAPK8-associated membrane protein                  | JKAMP   | 702307 |
| Jumonji domain containing 4                             | JMJD4   | 696580 |
| Junction adhesion molecule like                         | JAML    | 704919 |
| Junctophilin 1                                          | JPH1    | 697014 |
| Kallikrein related peptidase 8                          | KLK8    | 719488 |
| Karyopherin alpha 1                                     | KPNA1   | 692082 |
| Karyopherin alpha 3 (importin alpha 4)                  | KPNA3   | 706925 |
| Karyopherin alpha 4 (importin alpha 3)                  | KPNA4   | 702486 |
| KAT8 regulatory NSL complex subunit 1                   | KANSL1  | 717172 |
| KAT8 regulatory NSL complex subunit 3                   | KANSL3  | 706159 |
| Katanin p60 (ATPase containing) subunit A 1             | KATNA1  | 698291 |
| KDEL endoplasmic reticulum protein retention receptor 1 | KDELR1  | 717928 |
| KDEL endoplasmic reticulum protein retention receptor 2 | KDELR2  | 704335 |
| KDEL endoplasmic reticulum protein retention receptor 3 | KDELR3  | 700810 |



|                                                |           |           |
|------------------------------------------------|-----------|-----------|
| KDEL motif containing 1                        | KDELC1    | 702156    |
| Kelch domain containing 10                     | KLHDC10   | 702290    |
| Kelch domain containing 4                      | KLHDC4    | 695768    |
| Kelch domain containing 8B                     | KLHDC8B   | 707348    |
| Kelch like family member 11                    | KLHL11    | 708393    |
| Kelch like family member 2                     | KLHL2     | 704790    |
| Kelch like family member 28                    | KLHL28    | 702075    |
| Kelch like family member 36                    | KLHL36    | 715423    |
| Kelch like family member 40                    | KLHL40    | 717366    |
| Kelch like family member 5                     | KLHL5     | 698740    |
| Kelch repeat and BTB (POZ) domain containing 2 | KBTBD2    | 709126    |
| Kell blood group, metallo-endopeptidase        | KEL       | 703492    |
| Keratin 14, type I                             | KRT14     | 100426180 |
| Keratin 222, type II                           | KRT222    | 701557    |
| Keratin 25, type I                             | KRT25     | 701915    |
| Keratin 4, type II                             | KRT4      | 700060    |
| Keratin 80, type II                            | KRT80     | 697190    |
| Keratin associated protein 12-4                | KRTAP12-4 | 712284    |
| Keratin associated protein 22-1                | KRTAP22-1 | 100428224 |
| Keratinocyte associated protein 3              | KRTCAP3   | 701066    |
| Keratinocyte differentiation factor 1          | KDF1      | 715312    |
| Keratocan                                      | KERA      | 709743    |
| KH homology domain containing 1                | KHDC1     | 715576    |
| KIAA0100 ortholog                              | KIAA0100  | 709307    |
| KIAA0141 ortholog                              | KIAA0141  | 702802    |
| KIAA0232 ortholog                              | KIAA0232  | 710141    |
| KIAA0355 ortholog                              | KIAA0355  | 705202    |
| KIAA0556 ortholog                              | KIAA0556  | 706125    |
| KIAA0907 ortholog                              | KIAA0907  | 718005    |
| KIAA1958 ortholog                              | KIAA1958  | 707028    |
| KIAA2013 ortholog                              | KIAA2013  | 722762    |
| Kinesin family member C3                       | KIFC3     | 705951    |
| Kinesin light chain 4                          | KLC4      | 698356    |
| Kizuna centrosomal protein                     | KIZ       | 700808    |
| KTI12 chromatin associated homolog             | KTI12     | 712824    |
| Kv channel interacting protein 2               | KCNIP2    | 712434    |
| Kxdl motif containing 1                        | KXD1      | 720235    |
| L-2-hydroxyglutarate dehydrogenase             | L2HGDH    | 705721    |
| La ribonucleoprotein domain family member 4B   | LARP4B    | 721993    |
| La ribonucleoprotein domain family member 6    | LARP6     | 699664    |
| La ribonucleoprotein domain family member 7    | LARP7     | 703731    |
| Lactamase beta                                 | LACTB     | 705365    |
| Lactate dehydrogenase B                        | LDHB      | 706110    |
| Lamin A/C                                      | LMNA      | 719414    |
| Lamin B receptor                               | LBR       | 700801    |
| Laminin subunit alpha 2                        | LAMA2     | 715394    |
| Laminin subunit beta 2                         | LAMB2     | 707892    |
| Late cornified envelope 3C                     | LCE3C     | 100423543 |

|                                                                                             |           |           |
|---------------------------------------------------------------------------------------------|-----------|-----------|
| Late cornified envelope 5A                                                                  | LCE5A     | 100423330 |
| Late endosomal/lysosomal adaptor, MAPK and MTOR activator 1                                 | LAMTOR1   | 718249    |
| Late endosomal/lysosomal adaptor, MAPK and MTOR activator 3                                 | LAMTOR3   | 709133    |
| LCK proto-oncogene, Src family tyrosine kinase                                              | LCK       | 717704    |
| LDL receptor related protein 1                                                              | LRP1      | 710965    |
| LDL receptor related protein 10                                                             | LRP10     | 712506    |
| LDL receptor related protein 2                                                              | LRP2      | 705786    |
| LDL receptor related protein associated protein 1                                           | LRPAP1    | 699677    |
| Lectin, mannose-binding, 1                                                                  | LMAN1     | 697449    |
| Lectin, mannose-binding, 1                                                                  | LMAN1     | 697449    |
| LEM domain containing 2                                                                     | LEMD2     | 718463    |
| LETM1 domain containing 1                                                                   | LETMD1    | 694422    |
| Leucine rich repeat (in FLII) interacting protein 1                                         | LRRFIP1   | 704379    |
| Leucine rich repeat and coiled-coil centrosomal protein 1                                   | LRRCC1    | 707964    |
| Leucine rich repeat and fibronectin type III domain containing 4                            | LRFN4     | 713166    |
| Leucine rich repeat and fibronectin type III domain containing 5                            | LRFN5     | 700512    |
| Leucine rich repeat and Ig domain containing 2                                              | LINGO2    | 706386    |
| Leucine rich repeat containing 20                                                           | LRRC20    | 710594    |
| Leucine rich repeat containing 36                                                           | LRRC36    | 697849    |
| Leucine rich repeat containing 4                                                            | LRRC4     | 698610    |
| Leucine rich repeat containing 42                                                           | LRRC42    | 714839    |
| Leucine rich repeat containing 61                                                           | LRRC61    | 704779    |
| Leucine rich repeat containing 71                                                           | LRRC71    | 718714    |
| Leucine rich repeat transmembrane neuronal 3                                                | LRRTM3    | 696536    |
| Leucine zipper putative tumor suppressor 3                                                  | PROSAP1P1 | 717136    |
| Leucine zipper, down-regulated in cancer 1-like                                             | LDOC1L    | 712760    |
| Leucine-rich repeat containing 8 family member D                                            | LRRC8D    | 100423127 |
| Leucine-rich repeats and immunoglobulin-like domains 3                                      | LRIG3     | 716344    |
| Leucine-rich repeats and WD repeat domain containing 1                                      | LRWD1     | 715187    |
| Leukocyte immunoglobulin-like receptor, subfamily B<br>(with TM and ITIM domains), member 1 | LILRB1    | 692340    |
| Leukocyte receptor cluster (LRC) member 1                                                   | LENG1     | 693417    |
| Leukocyte-associated immunoglobulin-like receptor 1                                         | LAIR1     | 695533    |
| Leupaxin                                                                                    | LPXN      | 702033    |
| Ligand dependent nuclear receptor interacting factor 1                                      | LRIF1     | 702445    |
| Ligase III, DNA, ATP-dependent                                                              | LIG3      | 715181    |
| Ligase IV, DNA, ATP-dependent                                                               | LIG4      | 695475    |
| Like-glycosyltransferase                                                                    | LARGE     | 717403    |
| LIM and SH3 protein 1                                                                       | LASP1     | 694950    |
| LIM domain binding 2                                                                        | LDB2      | 714918    |
| LIM domain only 2                                                                           | LMO2      | 717502    |
| Limb development membrane protein 1-like                                                    | LMBR1L    | 709548    |
| Lin-28 homolog B (C. Elegans)                                                               | LIN28B    | 696130    |
| Lin-9 DREAM muvb core complex component                                                     | LIN9      | 699056    |
| Lines homolog 1                                                                             | LINS1     | 693833    |
| Lipid droplet associated hydrolase                                                          | LDAH      | 717510    |
| Lipocalin 1                                                                                 | LCN1      | 711974    |
| Lipopolysaccharide-induced TNF factor                                                       | LITAF     | 711743    |

|                                                                    |          |           |
|--------------------------------------------------------------------|----------|-----------|
| Lipoyltransferase 1                                                | LIPT1    | 708812    |
| Lipoyltransferase 1                                                | LIPT1    | 708812    |
| Listerin E3 ubiquitin protein ligase 1                             | LTN1     | 714068    |
| LMBR1 domain containing 1                                          | LMBRD1   | 714710    |
| Low density lipoprotein receptor adaptor protein 1                 | LDLRAP1  | 713032    |
| LSM family member 14B                                              | LSM14B   | 700561    |
| LSM10, U7 small nuclear RNA associated                             | LSM10    | 713277    |
| LSM12 homolog                                                      | LSM12    | 714219    |
| LSM14A mrna processing body assembly factor                        | LSM14A   | 705085    |
| LSM2 homolog, U6 small nuclear RNA and mrna degradation associated | LSM2     | 715592    |
| LSM6 homolog, U6 small nuclear RNA and mrna degradation associated | LSM6     | 703226    |
| LUC7-like 3 pre-mrna splicing factor                               | LUC7L3   | 703662    |
| Ly6/neurotoxin 1                                                   | LYNX1    | 100428508 |
| Lymphocyte antigen 6 complex, locus G6C                            | LY6G6C   | 716220    |
| Lymphocyte antigen 86                                              | LY86     | 711507    |
| Lymphocyte cytosolic protein 2                                     | LCP2     | 700374    |
| Lymphoid enhancer-binding factor 1                                 | LEF1     | 695776    |
| Lysine (K)-specific demethylase 1A                                 | KDM1A    | 718609    |
| Lysine (K)-specific demethylase 3A                                 | KDM3A    | 697775    |
| Lysine (K)-specific methyltransferase 5B                           | KMT5B    | 710481    |
| Lysine-rich nucleolar protein 1                                    | KNOP1    | 695144    |
| Lysophosphatidic acid receptor 6                                   | LPAR6    | 705081    |
| Lysophosphatidylcholine acyltransferase 4                          | LPCAT4   | 696388    |
| Lysophospholipase II                                               | LYPLA2   | 719074    |
| Lysosomal protein transmembrane 4 alpha                            | LAPTM4A  | 701298    |
| Lysozyme-like 4                                                    | LYZL4    | 716549    |
| Lysyl oxidase like 1                                               | LOXL1    | 706464    |
| Lysyl oxidase like 3                                               | LOXL3    | 709834    |
| Lysyl-trna synthetase                                              | KARS     | 714516    |
| Macrophage erythroblast attacher                                   | MAEA     | 702015    |
| Macrophage stimulating 1                                           | MST1     | 705811    |
| MAD2 mitotic arrest deficient-like 2 (yeast)                       | MAD2L2   | 714527    |
| MAD2L1 binding protein                                             | MAD2L1BP | 701099    |
| MAF1 homolog, negative regulator of RNA polymerase III             | MAF1     | 700385    |
| MAGE family member D1                                              | MAGED1   | 696658    |
| MAGE family member D2                                              | MAGED2   | 701719    |
| MAGE family member F1                                              | MAGEF1   | 701676    |
| MAGE family member H1                                              | MAGEH1   | 703812    |
| Mago homolog, exon junction complex core component                 | MAGOH    | 714261    |
| Major facilitator superfamily domain containing 1                  | MFSD1    | 703674    |
| Major facilitator superfamily domain containing 14A                | MFSD14A  | 711233    |
| Major facilitator superfamily domain containing 14B                | MFSD14B  | 708498    |
| Major facilitator superfamily domain containing 3                  | MFSD3    | 703246    |
| Major histocompatibility complex, class I, A                       | MAMU-A3  | 699243    |
| Major histocompatibility complex, class I, E                       | MAMU-E   | 711532    |
| Major histocompatibility complex, class II, DP alpha               | MAMU-DPA | 717992    |

|                                                                                         |          |           |
|-----------------------------------------------------------------------------------------|----------|-----------|
| MAK16 homolog                                                                           | MAK16    | 696648    |
| Makorin ring finger protein 1                                                           | MKRN1    | 716752    |
| Malate dehydrogenase 1                                                                  | MDH1     | 694703    |
| Male-enhanced antigen 1                                                                 | MEA1     | 699300    |
| Male-specific lethal 3 homolog (Drosophila)                                             | MSL3     | 720836    |
| Malonyl-coa-acyl carrier protein transacylase                                           | MCAT     | 711556    |
| Mannose phosphate isomerase                                                             | MPI      | 722129    |
| Mannose receptor, C type 1                                                              | MRC1     | 701010    |
| Mannose-6-phosphate receptor (cation dependent)                                         | M6PR     | 716696    |
| Mannose-P-dolichol utilization defect 1                                                 | MPDU1    | 715962    |
| Mannosidase, alpha, class 1B, member 1                                                  | MAN1B1   | 706918    |
| Mannosidase, alpha, class 2B, member 1                                                  | MAN2B1   | 716173    |
| Mannosidase, alpha, class 2C, member 1                                                  | MAN2C1   | 705599    |
| Mannosidase, beta A, lysosomal                                                          | MANBA    | 712531    |
| Mannosyl (alpha-1,3-)-glycoprotein beta-1,2-N-acetylglucosaminyl transferase            | MGAT1    | 707375    |
| Mannosyl (alpha-1,3-)-glycoprotein beta-1,4-N-acetylglucosaminyl transferase, isozyme B | MGAT4B   | 705006    |
| Mannosyl (alpha-1,6-)-glycoprotein beta-1,2-N-acetylglucosaminyl transferase            | MGAT2    | 706426    |
| Mannosyl (alpha-1,6-)-glycoprotein beta-1,6-N-acetyl-glucosaminyl transferase           | MGAT5    | 709108    |
| Mannosyl-oligosaccharide glucosidase                                                    | MOGS     | 708913    |
| MAP kinase interacting serine/threonine kinase 1                                        | MKNK1    | 710061    |
| MAP/microtubule affinity-regulating kinase 2                                            | MARK2    | 718065    |
| MAP7 domain containing 1                                                                | MAP7D1   | 712899    |
| MAP-kinase activating death domain                                                      | MADD     | 713613    |
| MARCKS-like 1                                                                           | MARCKSL1 | 100428619 |
| MAS-related GPR, member X4                                                              | MRGPRX4  | 692123    |
| Mastermind like transcriptional coactivator 1                                           | MAML1    | 715047    |
| Matrin 3                                                                                | MATR3    | 100568450 |
| Mckusick-Kaufman syndrome                                                               | MKKS     | 718547    |
| MDM2 binding protein                                                                    | MTBP     | 703121    |
| MDM4, p53 regulator                                                                     | MDM4     | 699563    |
| Mediator complex subunit 13-like                                                        | MED13L   | 713867    |
| Mediator complex subunit 19                                                             | MED19    | 704421    |
| Mediator complex subunit 21                                                             | MED21    | 710699    |
| Mediator complex subunit 23                                                             | MED23    | 714629    |
| Mediator complex subunit 6                                                              | MED6     | 693320    |
| Mediator of cell motility 1                                                             | MEMO1    | 706051    |
| Meiosis 1 associated protein                                                            | M1AP     | 710210    |
| Meis homeobox 1                                                                         | MEIS1    | 697685    |
| Meis homeobox 2                                                                         | MEIS2    | 699748    |
| Melatonin receptor 1A                                                                   | MTNR1A   | 702686    |
| Melatonin receptor 1B                                                                   | MTNR1B   | 695629    |
| Membrane protein, palmitoylated 1                                                       | MPP1     | 702092    |
| Meningioma (disrupted in balanced translocation) 1                                      | MN1      | 107000621 |
| Meningioma expressed antigen 5 (hyaluronidase)                                          | MGEA5    | 712370    |

|                                                                                                                                          |           |          |
|------------------------------------------------------------------------------------------------------------------------------------------|-----------|----------|
| Meprin A subunit beta                                                                                                                    | MEP1B     | 707036   |
| Mesoderm specific transcript                                                                                                             | MEST      | 703327   |
| Metadherin                                                                                                                               | MTDH      | 702410   |
| Metal response element binding transcription factor 2                                                                                    | MTF2      | 707104   |
| Metallothionein 2A                                                                                                                       | MT2A      | 700719   |
| Metallothionein 3                                                                                                                        | MT3       | 700602   |
| Metallothionein-1M                                                                                                                       | MT1M      | 708679   |
| Metastasis associated 1 family member 2                                                                                                  | MTA2      | 718772   |
| Metastasis associated 1 family member 3                                                                                                  | MTA3      | 712967   |
| Metaxin 1                                                                                                                                | MTX1      | 717595   |
| Methenyltetrahydrofolate synthetase domain containing                                                                                    | MTHFSD    | 694732   |
| Methionine adenosyltransferase II, alpha                                                                                                 | MAT2A     | 695362   |
| Methionine sulfoxide reductase B3                                                                                                        | MSRB3     | 717617   |
| Methionyl aminopeptidase 2                                                                                                               | METAP2    | 712400   |
| Methionyl-trna synthetase                                                                                                                | MARS      | 714744   |
| Methyl-cpg binding domain 4 DNA glycosylase                                                                                              | MBD4      | 720557   |
| Methylenetetrahydrofolate dehydrogenase (NADP+ dependent) 1, methenyl tetrahydrofolate cyclohydrolase, formyltetrahydrofolate synthetase | MTHFD1    | 707059   |
| Methylmalonic aciduria (cobalamin deficiency) cblb type                                                                                  | MMAB      | 708973   |
| Methylmalonic aciduria (cobalamin deficiency) cbld type, with homocystinuria                                                             | MMADHC    | 693783   |
| Methyltransferase like 1                                                                                                                 | METTL1    | 715796   |
| Methyltransferase like 13                                                                                                                | METTL13   | 704943   |
| Methyltransferase like 18                                                                                                                | METTL18   | 701890   |
| Methyltransferase like 22                                                                                                                | METTL22   | 708739   |
| Methyltransferase like 3                                                                                                                 | METTL3    | 706852   |
| Methyltransferase like 8                                                                                                                 | METTL8    | 695361   |
| MHC class II antigen                                                                                                                     | MAMU-DRB1 | 692100   |
| Microsomal glutathione S-transferase 1                                                                                                   | MGST1     | 701652   |
| Microsomal glutathione S-transferase 2                                                                                                   | MGST2     | 697983   |
| Microsomal glutathione S-transferase 3                                                                                                   | MGST3     | 695275   |
| Microtubule associated protein 1 light chain 3 alpha                                                                                     | MAP1LC3A  | 707439   |
| Microtubule associated protein 1S                                                                                                        | MAP1S     | 719196   |
| Microtubule associated protein 2                                                                                                         | MAP2      | 710840   |
| Microtubule associated protein 4                                                                                                         | MAP4      | 1.00E+08 |
| Microtubule associated protein RP/EB family member 1                                                                                     | MAPRE1    | 711404   |
| Microtubule-associated protein 7                                                                                                         | MAP7      | 705355   |
| Midline 1                                                                                                                                | MID1      | 709683   |
| Midnolin                                                                                                                                 | MIDN      | 721215   |
| Minichromosome maintenance complex component 3 associated protein                                                                        | MCM3AP    | 721810   |
| Missing oocyte, meiosis regulator, homolog (Drosophila)                                                                                  | MIOS      | 696371   |
| Mitochondrial assembly of ribosomal large subunit 1                                                                                      | MALSU1    | 704884   |
| Mitochondrial E3 ubiquitin protein ligase 1                                                                                              | MUL1      | 705429   |
| Mitochondrial elongation factor 2                                                                                                        | MIEF2     | 700705   |
| Mitochondrial fission regulator 1                                                                                                        | MTFR1     | 711143   |
| Mitochondrial fission regulator 1-like                                                                                                   | MTFR1L    | 713213   |

|                                                         |         |           |
|---------------------------------------------------------|---------|-----------|
| Mitochondrial genome maintenance exonuclease 1          | MGME1   | 696467    |
| Mitochondrial intermediate peptidase                    | MIPEP   | 707131    |
| Mitochondrial poly(A) polymerase                        | MTPAP   | 694491    |
| Mitochondrial ribosomal protein L10                     | MRPL10  | 695136    |
| Mitochondrial ribosomal protein L11                     | MRPL11  | 714094    |
| Mitochondrial ribosomal protein L16                     | MRPL16  | 698831    |
| Mitochondrial ribosomal protein L18                     | MRPL18  | 702629    |
| Mitochondrial ribosomal protein L19                     | MRPL19  | 711081    |
| Mitochondrial ribosomal protein L20                     | MRPL20  | 701533    |
| Mitochondrial ribosomal protein L22                     | MRPL22  | 714920    |
| Mitochondrial ribosomal protein L24                     | MRPL24  | 718640    |
| Mitochondrial ribosomal protein L36                     | MRPL36  | 100430880 |
| Mitochondrial ribosomal protein L37                     | MRPL37  | 715168    |
| Mitochondrial ribosomal protein L39                     | MRPL39  | 708631    |
| Mitochondrial ribosomal protein L42                     | MRPL42  | 715676    |
| Mitochondrial ribosomal protein L43                     | MRPL43  | 711038    |
| Mitochondrial ribosomal protein L46                     | MRPL46  | 697872    |
| Mitochondrial ribosomal protein L48                     | MRPL48  | 718240    |
| Mitochondrial ribosomal protein L50                     | MRPL50  | 713923    |
| Mitochondrial ribosomal protein L51                     | MRPL51  | 713036    |
| Mitochondrial ribosomal protein L55                     | MRPL55  | 695962    |
| Mitochondrial ribosomal protein L9                      | MRPL9   | 711235    |
| Mitochondrial ribosomal protein S11                     | MRPS11  | 697743    |
| Mitochondrial ribosomal protein S12                     | MRPS12  | 695196    |
| Mitochondrial ribosomal protein S17                     | MRPS17  | 703678    |
| Mitochondrial ribosomal protein S18A                    | MRPS18A | 701465    |
| Mitochondrial ribosomal protein S18C                    | MRPS18C | 707257    |
| Mitochondrial ribosomal protein S21                     | MRPS21  | 706805    |
| Mitochondrial ribosomal protein S22                     | MRPS22  | 715845    |
| Mitochondrial ribosomal protein S23                     | MRPS23  | 708818    |
| Mitochondrial ribosomal protein S28                     | MRPS28  | 699755    |
| Mitochondrial ribosomal protein S33                     | MRPS33  | 693681    |
| Mitochondrial ribosomal protein S7                      | MRPS7   | 701800    |
| Mitochondrial ribosomal protein S9                      | MRPS9   | 712968    |
| Mitochondrial transcription termination factor 3        | MTERF3  | 701366    |
| Mitochondrial translational initiation factor 2         | MTIF2   | 717042    |
| Mitochondrial translational initiation factor 3         | MTIF3   | 710571    |
| Mitogen-activated protein kinase 1                      | MAPK1   | 698569    |
| Mitogen-activated protein kinase 11                     | MAPK11  | 715794    |
| Mitogen-activated protein kinase 12                     | MAPK12  | 715745    |
| Mitogen-activated protein kinase kinase 1               | MAP2K1  | 710415    |
| Mitogen-activated protein kinase kinase 4               | MAP2K4  | 718155    |
| Mitogen-activated protein kinase kinase 5               | MAP2K5  | 711672    |
| Mitogen-activated protein kinase kinase kinase 11       | MAP3K11 | 716038    |
| Mitogen-activated protein kinase kinase kinase 3        | MAP3K3  | 717866    |
| Mitogen-activated protein kinase kinase kinase 4        | MAP3K4  | 710360    |
| Mitogen-activated protein kinase kinase kinase 6        | MAP3K6  | 715911    |
| Mitogen-activated protein kinase kinase kinase kinase 2 | MAP4K2  | 699331    |

|                                                                |          |           |
|----------------------------------------------------------------|----------|-----------|
| Mitogen-activated protein kinase kinase kinase kinase 4        | MAP4K4   | 716595    |
| Mitogen-activated protein kinase kinase kinase kinase 5        | MAP4K5   | 706204    |
| Mitogen-activated protein kinase-activated protein kinase 2    | MAPKAPK2 | 695044    |
| Mitogen-activated protein kinase-activated protein kinase 3    | MAPKAPK3 | 701320    |
| Mitogen-activated protein kinase-activated protein kinase 5    | MAPKAPK5 | 713521    |
| Mitotic spindle organizing protein 2B                          | MZT2B    | 701787    |
| MNAT CDK-activating kinase assembly factor 1                   | MNAT1    | 703905    |
| MOB family member 4, phocein                                   | MOB4     | 698149    |
| Molybdenum cofactor synthesis 2                                | MOCS2    | 703689    |
| MON1 homolog B, secretory trafficking associated               | MON1B    | 715104    |
| Monoacylglycerol O-acyltransferase 2                           | MOGAT2   | 696347    |
| Morf4 family associated protein 1                              | MRFAP1   | 710771    |
| Morf4 family associated protein 1-like 1                       | MRFAP1L1 | 710411    |
| MORN repeat containing 2                                       | MORN2    | 106992909 |
| Mortality factor 4 like 1                                      | MORF4L1  | 711357    |
| Mov10 RISC complex RNA helicase                                | MOV10    | 705910    |
| M-phase phosphoprotein 6                                       | MPHOSPH6 | 714335    |
| M-phase specific PLK1 interacting protein                      | MPLKIP   | 703092    |
| Mpv17 mitochondrial inner membrane protein                     | MPV17    | 701026    |
| Msh homeobox 2                                                 | MSX2     | 694227    |
| MSS51 mitochondrial translational activator                    | MSS51    | 707066    |
| Multiple C2 domains, transmembrane 2                           | MCTP2    | 706949    |
| Murine retrovirus integration site 1 homolog                   | MRVI1    | 702830    |
| MUS81 structure-specific endonuclease subunit                  | MUS81    | 715558    |
| Muscle, skeletal, receptor tyrosine kinase                     | MUSK     | 709397    |
| Muscleblind like splicing regulator 1                          | MBNL1    | 708735    |
| Mutl homolog 1                                                 | MLH1     | 698782    |
| Muty DNA glycosylase                                           | MUTYH    | 705651    |
| Myb/SANT-like DNA-binding domain containing 2                  | MSANTD2  | 712347    |
| MYC associated factor X                                        | MAX      | 708228    |
| MYCBP-associated, testis expressed 1                           | MAATS1   | 712979    |
| Myelin protein zero-like 2                                     | MPZL2    | 699330    |
| Myelin regulatory factor                                       | MYRF     | 719083    |
| Myeloid cell leukemia 1                                        | MCL1     | 707539    |
| Myeloid differentiation primary response 88                    | MYD88    | 696494    |
| Myeloid leukemia factor 1                                      | MLF1     | 704116    |
| Myeloid/lymphoid or mixed-lineage leukemia; translocated to, 6 | MLLT6    | 694045    |
| Myocyte enhancer factor 2A                                     | MEF2A    | 708956    |
| Myomesin 1                                                     | MYOM1    | 695301    |
| Myosin light chain kinase 3                                    | MYLK3    | 716132    |
| Myosin XVIII A                                                 | MYO18A   | 711171    |
| Myosin, light chain 12A, regulatory, non-sarcomeric            | MYL12A   | 695077    |
| Myotubularin 1                                                 | MTM1     | 703131    |
| Myotubularin related protein 11                                | MTMR11   | 705542    |
| Myotubularin related protein 2                                 | MTMR2    | 699703    |
| Myotubularin related protein 4                                 | MTMR4    | 714621    |
| Myotubularin related protein 6                                 | MTMR6    | 709118    |
| Myristoylated alanine-rich protein kinase C substrate          | MARCKS   | 694077    |

|                                                                   |         |        |
|-------------------------------------------------------------------|---------|--------|
| MYST/Esa1-associated factor 6                                     | MEAF6   | 713666 |
| N(alpha)-acetyltransferase 30, natc catalytic subunit             | NAA30   | 699379 |
| N(alpha)-acetyltransferase 50, nate catalytic subunit             | NAA50   | 709764 |
| N(alpha)-acetyltransferase 60, natf catalytic subunit             | NAA60   | 703207 |
| N-6 adenine-specific DNA methyltransferase 2 (putative)           | N6AMT2  | 703665 |
| NACC family member 2, BEN and BTB (POZ) domain containing         | NACC2   | 721794 |
| N-acetylglucosamine kinase                                        | NAGK    | 703976 |
| N-acetylglucosamine-1-phosphodiester                              | NAGPA   | 707352 |
| alpha-N-acetylglucosaminidase                                     |         |        |
| N-acetyltransferase 10 (GCN5-related)                             | NAT10   | 717452 |
| N-acetyltransferase 8-like (GCN5-related, putative)               | NAT8L   | 722359 |
| NAD(P) dependent steroid dehydrogenase-like                       | NSDHL   | 693333 |
| NAD(P)H dehydrogenase, quinone 2                                  | NQO2    | 707675 |
| NADH:ubiquinone oxidoreductase complex assembly factor 1          | NDUFAF1 | 710275 |
| NADH:ubiquinone oxidoreductase complex assembly factor 2          | NDUFAF2 | 693441 |
| NADH:ubiquinone oxidoreductase complex assembly factor 4          | NDUFAF4 | 705102 |
| NADH:ubiquinone oxidoreductase complex assembly factor 6          | NDUFAF6 | 700515 |
| NADH:ubiquinone oxidoreductase complex assembly factor 7          | NDUFAF7 | 709473 |
| NADH:ubiquinone oxidoreductase core subunit S2                    | NDUFS2  | 719935 |
| NADH:ubiquinone oxidoreductase core subunit S3                    | NDUFS3  | 713040 |
| NADH:ubiquinone oxidoreductase subunit A1                         | NDUFA1  | 694635 |
| NADH:ubiquinone oxidoreductase subunit A12                        | NDUFA12 | 711970 |
| NADH:ubiquinone oxidoreductase subunit A8                         | NDUFA8  | 698706 |
| NADH:ubiquinone oxidoreductase subunit AB1                        | NDUFAB1 | 700718 |
| NADH:ubiquinone oxidoreductase subunit B2                         | NDUFB2  | 693431 |
| NADH:ubiquinone oxidoreductase subunit B4                         | NDUFB4  | 713428 |
| NADH:ubiquinone oxidoreductase subunit B5                         | NDUFB5  | 708821 |
| NADH:ubiquinone oxidoreductase subunit B8                         | NDUFB8  | 710521 |
| NADH:ubiquinone oxidoreductase subunit B9                         | NDUFB9  | 711387 |
| NADH:ubiquinone oxidoreductase subunit S4                         | NDUFS4  | 704137 |
| NADH:ubiquinone oxidoreductase subunit S6                         | NDUFS6  | 709426 |
| NADPH oxidase organizer 1                                         | NOXO1   | 694059 |
| Nascent polypeptide-associated complex alpha subunit              | NACA    | 713416 |
| Natriuretic peptide receptor 2                                    | NPR2    | 695750 |
| NCK adaptor protein 1                                             | NCK1    | 716807 |
| NCK adaptor protein 2                                             | NCK2    | 713287 |
| NCK interacting protein with SH3 domain                           | NCKIPSD | 709410 |
| NECAP endocytosis associated 2                                    | NECAP2  | 698687 |
| Nedd4 family interacting protein 1                                | NDFIP1  | 705716 |
| Nedd4 family interacting protein 2                                | NDFIP2  | 698464 |
| NEDD8 activating enzyme E1 subunit 1                              | NAE1    | 696429 |
| Negative elongation factor complex member C/D                     | NELFCD  | 696053 |
| Negative elongation factor complex member E                       | NELFE   | 716913 |
| Negative regulator of ubiquitin-like proteins 1                   | NUB1    | 715231 |
| Nerve growth factor receptor (TNFRSF16) associated protein 1      | NGFRAP1 | 340542 |
| N-ethylmaleimide-sensitive factor attachment protein, gamma       | NAPG    | 704546 |
| Neugrin, neurite outgrowth associated                             | NGRN    | 702187 |
| Neural precursor cell expressed, developmentally down-regulated 1 | NEDD1   | 713673 |



|                                                           |         |           |
|-----------------------------------------------------------|---------|-----------|
| Neural proliferation, differentiation and control, 1      | NPDC1   | 707453    |
| Neurexophilin and PC-esterase domain family member 3      | NXPE3   | 702612    |
| Neuritin 1                                                | NRN1    | 722968    |
| Neurochondrin                                             | NCDN    | 712930    |
| Neuroglobin                                               | NGB     | 641331    |
| Neurolysin (metallopeptidase M3 family)                   | NLN     | 696884    |
| Neuronal cell adhesion molecule                           | NRCAM   | 574228    |
| Neuronal differentiation 1                                | NEUROD1 | 704954    |
| Neuronal PAS domain protein 2                             | NPAS2   | 710480    |
| Neuronal PAS domain protein 4                             | NPAS4   | 714161    |
| Neuropilin 1                                              | NRP1    | 697755    |
| Neuropilin and tolloid like 1                             | NETO1   | 694322    |
| Neutrophil cytosolic factor 4                             | NCF4    | 695612    |
| NFKB activating protein                                   | NKAP    | 694891    |
| NFKB repressing factor                                    | NKRF    | 693851    |
| NGFI-A binding protein 2 (EGR1 binding protein 2)         | NAB2    | 714209    |
| N-glycanase 1                                             | NGLY1   | 700842    |
| NHL repeat containing 3                                   | NHLRC3  | 696852    |
| Nicastrin                                                 | NCSTN   | 719696    |
| Nicotinamide nucleotide transhydrogenase                  | NNT     | 701110    |
| Niemann-Pick disease, type C2                             | NPC2    | 699881    |
| NIMA-related kinase 1                                     | NEK1    | 694345    |
| NIMA-related kinase 3                                     | NEK3    | 710127    |
| NIN1/RPN12 binding protein 1 homolog                      | NOB1    | 705344    |
| Ninein                                                    | NIN     | 709532    |
| Nitric oxide associated 1                                 | NOA1    | 693437    |
| NK2 homeobox 5                                            | NKX2-5  | 703795    |
| NKG2D protein                                             | NKG2D   | 574240    |
| NLR family, pyrin domain containing 1                     | NLRP1   | 721648    |
| NLR family, pyrin domain containing 10                    | NLRP10  | 709794    |
| NLR family, pyrin domain containing 4                     | NLRP4   | 703431    |
| NLR family, pyrin domain containing 9                     | NLRP9   | 719115    |
| NMD3 ribosome export adaptor                              | NMD3    | 701677    |
| NME/NM23 nucleoside diphosphate kinase 2                  | NME2    | 100533957 |
| N-myristoyltransferase 1                                  | NMT1    | 715885    |
| NOC2-like nucleolar associated transcriptional repressor  | NOC2L   | 697809    |
| Non imprinted in Prader-Willi/Angelman syndrome 2         | NIPA2   | 710147    |
| Non-POU domain containing, octamer-binding                | NONO    | 697263    |
| Non-SMC condensin I complex subunit D2                    | NCAPD2  | 712834    |
| Non-SMC condensin I complex subunit G                     | NCAPG   | 715235    |
| Non-SMC condensin II complex subunit D3                   | NCAPD3  | 700276    |
| NOP16 nucleolar protein                                   | NOP16   | 696768    |
| NOP58 ribonucleoprotein                                   | NOP58   | 703859    |
| Notch 4                                                   | NOTCH4  | 717323    |
| NRDE-2, necessary for RNA interference, domain containing | NRDE2   | 695676    |
| NSA2, ribosome biogenesis homolog                         | NSA2    | 704670    |
| NSE1 homolog, SMC5-SMC6 complex component                 | NSMCE1  | 703436    |
| NSE3 homolog, SMC5-SMC6 complex component                 | NSMCE3  | 712714    |

|                                                                           |         |        |
|---------------------------------------------------------------------------|---------|--------|
| NSE4 homolog A, SMC5-SMC6 complex component                               | NSMCE4A | 705375 |
| NSF attachment protein alpha                                              | NAPA    | 717355 |
| NSFL1 (p97) cofactor (p47)                                                | NSFL1C  | 715743 |
| NSL1, MIS12 kinetochore complex component                                 | NSL1    | 710371 |
| N-terminal Xaa-Pro-Lys N-methyltransferase 1                              | NTMT1   | 716763 |
| NUAK family, SNF1-like kinase, 1                                          | NUAK1   | 702256 |
| Nuclear casein kinase and cyclin-dependent kinase substrate 1             | NUCKS1  | 697298 |
| Nuclear envelope integral membrane protein 1                              | NEMP1   | 710700 |
| Nuclear factor I/A                                                        | NFIA    | 694022 |
| Nuclear factor of activated T-cells, cytoplasmic, calcineurin-dependent 3 | NFATC3  | 702390 |
| Nuclear factor of kappa light polypeptide gene enhancer in B-cells 1      | NFKB1   | 710324 |
| Nuclear factor, erythroid 2 like 1                                        | NFE2L1  | 695404 |
| Nuclear factor, erythroid 2 like 2                                        | NFE2L2  | 707606 |
| Nuclear fragile X mental retardation protein interacting protein 2        | NUFIP2  | 711330 |
| Nuclear pore associated protein 1                                         | NPAP1   | 719891 |
| Nuclear prelamin A recognition factor-like                                | NARFL   | 722381 |
| Nuclear receptor binding SET domain protein 1                             | NSD1    | 706131 |
| Nuclear receptor coactivator 4                                            | NCOA4   | 709509 |
| Nuclear receptor coactivator 6                                            | NCOA6   | 706903 |
| Nuclear receptor subfamily 1 group I member 2                             | NR1I2   | 574226 |
| Nuclear receptor subfamily 2 group F member 2                             | NR2F2   | 707483 |
| Nuclear receptor subfamily 2 group F member 6                             | NR2F6   | 719699 |
| Nuclear RNA export factor 1                                               | NXF1    | 718420 |
| Nuclear transcription factor Y subunit alpha                              | NFYA    | 719697 |
| Nuclear transcription factor Y subunit gamma                              | NFYC    | 696290 |
| Nuclear transport factor 2-like export factor 1                           | NXT1    | 711846 |
| Nuclear transport factor 2-like export factor 2                           | NXT2    | 704593 |
| Nucleobindin 2                                                            | NUCB2   | 697084 |
| Nucleolar and coiled-body phosphoprotein 1                                | NOLC1   | 712789 |
| Nucleolar protein 8                                                       | NOL8    | 705799 |
| Nucleoporin 107kda                                                        | NUP107  | 718214 |
| Nucleoporin 205kda                                                        | NUP205  | 708216 |
| Nucleoporin 210kda                                                        | NUP210  | 693669 |
| Nucleoporin 35kda                                                         | NUP35   | 706497 |
| Nucleoporin 50kda                                                         | NUP50   | 713282 |
| Nucleoporin 85kda                                                         | NUP85   | 705628 |
| Nucleoporin 88kda                                                         | NUP88   | 711734 |
| Nucleosome assembly protein 1-like 5                                      | NAP1L5  | 703223 |
| Nudc domain containing 3                                                  | NUDCD3  | 699353 |
| Nudc nuclear distribution protein                                         | NUDC    | 719986 |
| Nude neurodevelopment protein 1-like 1                                    | NDEL1   | 721973 |
| Nudix hydrolase 1                                                         | NUDT1   | 713078 |
| Nudix hydrolase 2                                                         | NUDT2   | 701795 |
| Nudix hydrolase 3                                                         | NUDT3   | 718568 |
| Nudix hydrolase 5                                                         | NUDT5   | 694368 |
| Nudix hydrolase 9                                                         | NUDT9   | 701344 |
| Numb homolog (Drosophila)                                                 | NUMB    | 696528 |

|                                                              |         |           |
|--------------------------------------------------------------|---------|-----------|
| NUS1 dehydrodolichyl diphosphate synthase subunit            | NUS1    | 715015    |
| O-6-methylguanine-DNA methyltransferase                      | MGMT    | 698134    |
| O-acyl-ADP-ribose deacylase 1                                | OARD1   | 719685    |
| Occludin/ELL domain containing 1                             | OCEL1   | 718921    |
| Oculocerebrorenal syndrome of Lowe                           | OCRL    | 702345    |
| Olfactomedin like 3                                          | OLFML3  | 707969    |
| Olfactory receptor, family 1, subfamily Q, member 1          | OR1Q1   | 697695    |
| Olfactory receptor, family 10, subfamily A, member 4         | OR10A4  | 100423176 |
| Olfactory receptor, family 2, subfamily AG, member 2         | OR2AG2  | 709556    |
| Olfactory receptor, family 2, subfamily F, member 1          | OR2F1   | 707900    |
| Olfactory receptor, family 2, subfamily H, member 2          | OR2H2   | 710946    |
| Olfactory receptor, family 2, subfamily W, member 1          | OR2W1   | 708515    |
| Olfactory receptor, family 4, subfamily E, member 2          | OR4E2   | 708887    |
| Olfactory receptor, family 4, subfamily N, member 2          | OR4N2   | 701881    |
| Olfactory receptor, family 5, subfamily L, member 1          | OR5L1   | 719174    |
| Olfactory receptor, family 5, subfamily M, member 9          | OR5M9   | 705878    |
| Olfactory receptor, family 52, subfamily N, member 4         | OR52N4  | 696970    |
| Olfactory receptor, family 7, subfamily D, member 4          | OR7D4   | 721322    |
| Oligonucleotide/oligosaccharide-binding fold containing 1    | OBFC1   | 714968    |
| Oncomodulin 2                                                | OCM2    | 721827    |
| Optic atrophy 1 (autosomal dominant)                         | OPA1    | 698540    |
| ORAI calcium release-activated calcium modulator 1           | ORAI1   | 700190    |
| Oral-facial-digital syndrome 1                               | OFD1    | 711677    |
| Origin recognition complex subunit 3                         | ORC3    | 700773    |
| Origin recognition complex subunit 5                         | ORC5    | 696683    |
| ORMDL sphingolipid biosynthesis regulator 2                  | ORMDL2  | 710296    |
| ORMDL sphingolipid biosynthesis regulator 3                  | ORMDL3  | 699154    |
| Ornithine aminotransferase                                   | OAT     | 693970    |
| Ornithine decarboxylase antizyme 1                           | OAZ1    | 721477    |
| Ornithine decarboxylase antizyme 2                           | OAZ2    | 707593    |
| Osteosarcoma amplified 9, endoplasmic reticulum lectin       | OS9     | 715555    |
| OTU deubiquitinase with linear linkage specificity           | OTULIN  | 698991    |
| OTU domain containing 6B                                     | OTUD6B  | 697015    |
| Outer dense fiber of sperm tails 1                           | ODF1    | 707269    |
| Outer dense fiber of sperm tails 2                           | ODF2    | 717505    |
| Outer dense fiber of sperm tails 3                           | ODF3    | 696480    |
| Outer dense fiber of sperm tails 3-like 1                    | ODF3L1  | 706545    |
| Oviductal glycoprotein 1                                     | OVGP1   | 703848    |
| Oxidative stress responsive 1                                | OXSR1   | 696362    |
| Oxoglutarate (alpha-ketoglutarate) dehydrogenase (lipoamide) | OGDH    | 698854    |
| Oxysterol binding protein like 10                            | OSBPL10 | 703555    |
| Oxysterol binding protein like 11                            | OSBPL11 | 716096    |
| Oxysterol binding protein like 5                             | OSBPL5  | 706613    |
| P21 protein (Cdc42/Rac)-activated kinase 1                   | PAK1    | 698585    |
| P21 protein (Cdc42/Rac)-activated kinase 2                   | PAK2    | 710314    |
| P450 (cytochrome) oxidoreductase                             | POR     | 715888    |
| P53 and DNA damage regulated 1                               | PDRG1   | 712622    |
| Paired box 9                                                 | PAX9    | 100429091 |

|                                                                   |         |           |
|-------------------------------------------------------------------|---------|-----------|
| PAK1 interacting protein 1                                        | PAK1IP1 | 697856    |
| Pancreatic and duodenal homeobox 1                                | PDX1    | 710936    |
| Pancreatic polypeptide                                            | PPY     | 713988    |
| Pantothenate kinase 1                                             | PANK1   | 696041    |
| PAP associated domain containing 7                                | PAPD7   | 713853    |
| Par-3 family cell polarity regulator                              | PARD3   | 706472    |
| Paralemmin 2                                                      | PALM2   | 100532751 |
| Paraspeckle component 1                                           | PSPC1   | 705080    |
| Parkinson protein 7                                               | PARK7   | 708377    |
| Partner and localizer of BRCA2                                    | PALB2   | 700843    |
| Partner of NOB1 homolog                                           | PNO1    | 100337566 |
| Paternally expressed 3                                            | PEG3    | 707825    |
| PCI domain containing 2                                           | PCID2   | 714247    |
| PDLIM1 interacting kinase 1 like                                  | PDIK1L  | 719774    |
| PDZ and LIM domain 1                                              | PDLIM1  | 702998    |
| PDZ domain containing 4                                           | PDZD4   | 697387    |
| Pecanex homolog (Drosophila)                                      | PCNX    | 694094    |
| Pecanex-like 4 (Drosophila)                                       | PCNXL4  | 702758    |
| Peptidase domain containing associated with muscle regeneration 1 | PAMR1   | 717140    |
| Peptide deformylase (mitochondrial)                               | PDF     | 100427223 |
| Peptidyl arginine deiminase, type III                             | PADI3   | 700560    |
| Peptidylprolyl isomerase A (cyclophilin A)                        | PPIA    | 574102    |
| Peptidylprolyl isomerase B (cyclophilin B)                        | PPIB    | 706757    |
| Peptidylprolyl isomerase domain and WD repeat containing 1        | PPWD1   | 696267    |
| Peptidylprolyl isomerase E (cyclophilin E)                        | PPIE    | 716340    |
| Peptidylprolyl isomerase G (cyclophilin G)                        | PPIG    | 706262    |
| Peptidylprolyl isomerase H (cyclophilin H)                        | PPIH    | 697669    |
| Peptidylprolyl isomerase like 3                                   | PPIL3   | 700456    |
| Peripheral myelin protein 22                                      | PMP22   | 693527    |
| Peroxiredoxin 2                                                   | PRDX2   | 716665    |
| Peroxiredoxin 3                                                   | PRDX3   | 702882    |
| Peroxiredoxin 4                                                   | PRDX4   | 697635    |
| Peroxisomal biogenesis factor 11 beta                             | PEX11B  | 698184    |
| Peroxisomal biogenesis factor 13                                  | PEX13   | 717886    |
| Peroxisomal biogenesis factor 16                                  | PEX16   | 714904    |
| Peroxisomal membrane protein 2                                    | PXMP2   | 693648    |
| Peroxisome proliferator-activated receptor delta                  | PPARD   | 718861    |
| PEST proteolytic signal containing nuclear protein                | PCNP    | 702162    |
| PH domain and leucine rich repeat protein phosphatase 1           | PHLPP1  | 705882    |
| PHD finger protein 1                                              | PHF1    | 718337    |
| PHD finger protein 12                                             | PHF12   | 710851    |
| PHD finger protein 14                                             | PHF14   | 694855    |
| PHD finger protein 2                                              | PHF2    | 717585    |
| PHD finger protein 23                                             | PHF23   | 714538    |
| PHD finger protein 6                                              | PHF6    | 707390    |
| PHD finger protein 7                                              | PHF7    | 697103    |
| Phenylalanine hydroxylase                                         | PAH     | 698696    |
| Phenylalanyl-trna synthetase 2, mitochondrial                     | FARS2   | 710945    |

|                                                                        |          |           |
|------------------------------------------------------------------------|----------|-----------|
| Phosphatase and actin regulator 1                                      | PHACTR1  | 700226    |
| Phosphatase and tensin homolog                                         | PTEN     | 705121    |
| Phosphatase, orphan 1                                                  | PHOSPHO1 | 698959    |
| Phosphatase, orphan 2                                                  | PHOSPHO2 | 100429653 |
| Phosphate cytidylyltransferase 1, choline, alpha                       | PCYT1A   | 722105    |
| Phosphatidylglycerophosphate synthase 1                                | PGS1     | 710125    |
| Phosphatidylinositol 3-kinase catalytic subunit type 3                 | PIK3C3   | 693918    |
| Phosphatidylinositol 4-kinase, catalytic, alpha                        | PI4KA    | 698020    |
| Phosphatidylinositol 4-kinase, catalytic, alpha                        | PI4KA    | 698020    |
| Phosphatidylinositol 4-kinase, catalytic, beta                         | PI4KB    | 710104    |
| Phosphatidylinositol binding clathrin assembly protein                 | PICALM   | 706003    |
| Phosphatidylinositol glycan anchor biosynthesis class A                | PIGA     | 712514    |
| Phosphatidylinositol glycan anchor biosynthesis class C                | PIGC     | 705657    |
| Phosphatidylinositol glycan anchor biosynthesis class C                | PIGC     | 705657    |
| Phosphatidylinositol glycan anchor biosynthesis class G                | PIGG     | 714088    |
| Phosphatidylinositol glycan anchor biosynthesis class H                | PIGH     | 710780    |
| Phosphatidylinositol glycan anchor biosynthesis class S                | PIGS     | 709115    |
| Phosphatidylinositol glycan anchor biosynthesis class U                | PIGU     | 707317    |
| Phosphatidylinositol glycan anchor biosynthesis class V                | PIGV     | 714898    |
| Phosphatidylinositol transfer protein alpha                            | PITPNA   | 721228    |
| Phosphatidylinositol transfer protein beta                             | PITPNB   | 713414    |
| Phosphatidylinositol-4,5-bisphosphate 3-kinase catalytic subunit alpha | PIK3CA   | 709959    |
| Phosphatidylinositol-4,5-bisphosphate 3-kinase catalytic subunit beta  | PIK3CB   | 716098    |
| Phosphatidylserine synthase 1                                          | PTDSS1   | 701486    |
| Phosphodiesterase 12                                                   | PDE12    | 703552    |
| Phosphodiesterase 4B                                                   | PDE4B    | 699309    |
| Phosphodiesterase 6D                                                   | PDE6D    | 712629    |
| Phosphodiesterase 8A                                                   | PDE8A    | 694750    |
| Phosphodiesterase 9A                                                   | PDE9A    | 100301991 |
| Phosphoenolpyruvate carboxykinase 2 (mitochondrial)                    | PCK2     | 714922    |
| Phosphoglucomutase 1                                                   | PGM1     | 699401    |
| Phosphohistidine phosphatase 1                                         | PHPT1    | 721674    |
| Phosphoinositide-3-kinase interacting protein 1                        | PIK3IP1  | 716694    |
| Phosphoinositide-3-kinase regulatory subunit 4                         | PIK3R4   | 718012    |
| Phospholipase A2 group IB                                              | PLA2G1B  | 696712    |
| Phospholipase A2 group VI                                              | PLA2G6   | 700184    |
| Phospholipase A2 group XIIB                                            | PLA2G12B | 708031    |
| Phospholipase A2 group XV                                              | PLA2G15  | 702619    |
| Phospholipase A2, group IVB (cytosolic)                                | PLA2G4B  | 100533113 |
| Phospholipase B domain containing 1                                    | PLBD1    | 698939    |
| Phospholipase B domain containing 2                                    | PLBD2    | 714669    |
| Phospholipase C beta 2                                                 | PLCB2    | 701951    |
| Phospholipase D family member 3                                        | PLD3     | 701083    |
| Phospholipid phosphatase 2                                             | PLPP2    | 721004    |
| Phospholipid phosphatase 6                                             | PLPP6    | 695188    |
| Phospholipid scramblase 3                                              | PLSCR3   | 721831    |

|                                                                                                                                  |          |        |
|----------------------------------------------------------------------------------------------------------------------------------|----------|--------|
| Phosphomevalonate kinase                                                                                                         | PMVK     | 717014 |
| Phosphopantothenoylcysteine synthetase                                                                                           | PPCS     | 697064 |
| Phosphoribosyl pyrophosphate synthetase 1-like 1                                                                                 | PRPS1L1  | 708413 |
| Phosphoribosyl pyrophosphate synthetase-associated protein 1                                                                     | PRPSAP1  | 706625 |
| Phosphoribosyl transferase domain containing 1                                                                                   | PRTFDC1  | 712819 |
| Phosphoribosylglycinamide formyltransferase,<br>phosphoribosylglycinamide synthetase,<br>phosphoribosylaminoimidazole synthetase | GART     | 704926 |
| Phosphorylase kinase, alpha 2 (liver)                                                                                            | PHKA2    | 694376 |
| Phosphorylase, glycogen, liver                                                                                                   | PYGL     | 706853 |
| Piggybac transposable element derived 2                                                                                          | PGBD2    | 709925 |
| PIGY upstream reading frame                                                                                                      | PYURF    | 702862 |
| PIH1 domain containing 1                                                                                                         | PIH1D1   | 718787 |
| PIN2/TERF1 interacting, telomerase inhibitor 1                                                                                   | PINX1    | 701523 |
| Pinin, desmosome associated protein                                                                                              | PNN      | 700296 |
| PITH (C-terminal proteasome-interacting domain of<br>thioredoxin-like) domain containing 1                                       | PITHD1   | 710737 |
| Pituitary tumor-transforming 1 interacting protein                                                                               | PTTG1IP  | 722061 |
| Placental growth factor                                                                                                          | PGF      | 701219 |
| Placenta-specific 1-like                                                                                                         | PLAC1L   | 698074 |
| PLAG1 like zinc finger 1                                                                                                         | PLAGL1   | 699985 |
| Plasminogen receptor, C-terminal lysine transmembrane protein                                                                    | PLGRKT   | 693286 |
| Plastin 3                                                                                                                        | PLS3     | 709055 |
| Platelet activating factor acetylhydrolase 1b catalytic subunit 2                                                                | PAFAH1B2 | 703013 |
| Platelet activating factor acetylhydrolase 1b regulatory subunit 1                                                               | PAFAH1B1 | 574255 |
| Platelet-derived growth factor beta polypeptide                                                                                  | PDGFB    | 703173 |
| Platelet-derived growth factor receptor, beta polypeptide                                                                        | PDGFRB   | 711353 |
| Pleckstrin homology and FYVE domain containing 2                                                                                 | PLEKHF2  | 701884 |
| Pleckstrin homology and rhogef domain containing G2                                                                              | PLEKHG2  | 698408 |
| Pleckstrin homology domain containing A3                                                                                         | PLEKHA3  | 703417 |
| Pleckstrin homology domain containing A7                                                                                         | PLEKHA7  | 697646 |
| Pleckstrin homology domain containing A8                                                                                         | PLEKHA8  | 696127 |
| Pleckstrin homology domain containing O1                                                                                         | PLEKHO1  | 706145 |
| Pleckstrin homology domain containing O2                                                                                         | PLEKHO2  | 712677 |
| Pleckstrin homology domain interacting protein                                                                                   | PHIP     | 716810 |
| Pleckstrin homology, myth4 and FERM domain containing H3                                                                         | PLEKHH3  | 711013 |
| Pleiotrophin                                                                                                                     | PTN      | 709496 |
| Plexin A2                                                                                                                        | PLXNA2   | 713800 |
| PNN-interacting serine/arginine-rich protein                                                                                     | PNISR    | 694075 |
| Pogo transposable element with KRAB domain                                                                                       | POGK     | 696834 |
| Pogo transposable element with ZNF domain                                                                                        | POGZ     | 710634 |
| Poliovirus receptor-related 2 (herpesvirus entry mediator B)                                                                     | PVRL2    | 713229 |
| Polo-like kinase 3                                                                                                               | PLK3     | 704071 |
| Poly(A) binding protein interacting protein 1                                                                                    | PAIP1    | 700869 |
| Poly(A) binding protein interacting protein 2                                                                                    | PAIP2    | 693317 |
| Poly(A) binding protein, cytoplasmic 1                                                                                           | PABPC1   | 705847 |
| Poly(A) polymerase alpha                                                                                                         | PAPOLA   | 641447 |
| Poly(A)-specific ribonuclease                                                                                                    | PARN     | 712984 |

|                                                                       |         |           |
|-----------------------------------------------------------------------|---------|-----------|
| Poly(ADP-ribose) glycohydrolase                                       | PARG    | 709432    |
| Poly(ADP-ribose) polymerase 2                                         | PARP2   | 701955    |
| Poly(ADP-ribose) polymerase family member 10                          | PARP10  | 708132    |
| Poly(ADP-ribose) polymerase family member 16                          | PARP16  | 709140    |
| Poly(rc) binding protein 2                                            | PCBP2   | 703175    |
| Polybromo 1                                                           | PBRM1   | 696361    |
| Polycomb group ring finger 2                                          | PCGF2   | 694187    |
| Polycomb group ring finger 3                                          | PCGF3   | 697151    |
| Polycomb group ring finger 6                                          | PCGF6   | 714508    |
| Polyglutamine binding protein 1                                       | PQBP1   | 711678    |
| Polyglutamine binding protein 1                                       | PQBP1   | 711678    |
| Polyhomeotic homolog 2 (Drosophila)                                   | PHC2    | 710201    |
| Polymerase (DNA directed), beta                                       | POLB    | 704801    |
| Polymerase (DNA directed), epsilon 3, accessory subunit               | POLE3   | 705074    |
| Polymerase (DNA directed), gamma                                      | POLG    | 699750    |
| Polymerase (RNA) II (DNA directed) polypeptide F                      | POLR2F  | 699566    |
| Polymerase (RNA) II (DNA directed) polypeptide G                      | POLR2G  | 718548    |
| Polymerase (RNA) II (DNA directed) polypeptide I, 14.5kda             | POLR2I  | 712412    |
| Polymerase (RNA) III (DNA directed) polypeptide B                     | POLR3B  | 702711    |
| Polymerase (RNA) III (DNA directed) polypeptide D, 44kda              | POLR3D  | 707923    |
| Polymerase (RNA) III (DNA directed) polypeptide E (80kd)              | POLR3E  | 697901    |
| Polymerase (RNA) III (DNA directed) polypeptide G (32kd)-like         | POLR3GL | 698563    |
| Polymerase (RNA) III (DNA directed) polypeptide H (22.9kd)            | POLR3H  | 707546    |
| Polymerase (RNA) mitochondrial (DNA directed)                         | POLRMT  | 100426183 |
| Polynucleotide kinase 3'-phosphatase                                  | PNKP    | 719084    |
| Polypeptide N-acetylgalactosaminyltransferase 1                       | GALNT1  | 708930    |
| Polypyrimidine tract binding protein 2                                | PTBP2   | 710101    |
| Polysaccharide biosynthesis domain containing 1                       | PBDC1   | 705125    |
| POP4 homolog, ribonuclease P/MRP subunit                              | POP4    | 700209    |
| POP5 homolog, ribonuclease P/MRP subunit                              | POP5    | 697559    |
| Potassium channel tetramerization domain containing 10                | KCTD10  | 707443    |
| Potassium channel tetramerization domain containing 17                | KCTD17  | 696210    |
| Potassium channel tetramerization domain containing 2                 | KCTD2   | 700474    |
| Potassium channel tetramerization domain containing 3                 | KCTD3   | 708471    |
| Potassium channel tetramerization domain containing 5                 | KCTD5   | 698663    |
| Potassium channel tetramerization domain containing 6                 | KCTD6   | 701810    |
| Potassium channel tetramerization domain containing 9                 | KCTD9   | 711515    |
| Potassium channel, two pore domain subfamily K, member 16             | KCNK16  | 719585    |
| Potassium channel, voltage gated modifier subfamily V, member 1       | KCNV1   | 699636    |
| Potassium channel, voltage gated shaker related subfamily A, member 5 | KCNA5   | 711886    |
| Potassium channel, voltage gated Shaw related subfamily C, member 2   | KCNC2   | 100430906 |
| Potassium voltage-gated channel, modifier subfamily S, member 1       | KCNS1   | 711715    |
| POU class 2 homeobox 1                                                | POU2F1  | 700530    |
| POZ (BTB) and AT hook containing zinc finger 1                        | PATZ1   | 718381    |

|                                                          |         |           |
|----------------------------------------------------------|---------|-----------|
| PR domain containing 14                                  | PRDM14  | 693324    |
| PR domain containing 2, with ZNF domain                  | PRDM2   | 716295    |
| PR domain containing 2, with ZNF domain                  | PRDM2   | 716295    |
| PR domain containing 4                                   | PRDM4   | 704529    |
| PR domain containing 5                                   | PRDM5   | 708790    |
| Praja ring finger 1, E3 ubiquitin protein ligase         | PJA1    | 695038    |
| Pre-B-cell leukemia homeobox 1                           | PBX1    | 694416    |
| Pre-B-cell leukemia homeobox 2                           | PBX2    | 716239    |
| Pre-B-cell leukemia homeobox 4                           | PBX4    | 106994668 |
| Prefoldin subunit 2                                      | PFDN2   | 719886    |
| Prefoldin subunit 5                                      | PFDN5   | 702355    |
| Prefoldin subunit 6                                      | PFDN6   | 718253    |
| PRELI domain containing 1                                | PRELID1 | 699254    |
| Pre-mrna processing factor 3                             | PRPF3   | 706898    |
| Pre-mrna processing factor 31                            | PRPF31  | 720567    |
| Pre-mrna processing factor 40 homolog A                  | PRPF40A | 696668    |
| Presenilin enhancer gamma secretase subunit              | PSENEN  | 100429005 |
| Progesterone and adiponectin receptor family member VIII | PAQR8   | 708418    |
| Programmed cell death 2                                  | PDCD2   | 696380    |
| Programmed cell death 2-like                             | PDCD2L  | 705688    |
| Programmed cell death 6                                  | PDCD6   | 723043    |
| Programmed cell death 7                                  | PDCD7   | 708758    |
| Prolactin regulatory element binding                     | PREB    | 700408    |
| Proliferating cell nuclear antigen                       | PCNA    | 718006    |
| Proline and serine rich 2                                | PROSER2 | 693705    |
| Proline rich 3                                           | PRR3    | 711699    |
| Proline rich membrane anchor 1                           | PRIMA1  | 100426274 |
| Proline rich nuclear receptor coactivator 2              | PNRC2   | 719213    |
| Proline, glutamate and leucine rich protein 1            | PELP1   | 677854    |
| Proline-rich coiled-coil 1                               | PRRC1   | 704248    |
| Proline-rich coiled-coil 2A                              | PRRC2A  | 715715    |
| Prolyl endopeptidase-like                                | PREPL   | 713980    |
| Prolylcarboxypeptidase                                   | PRCP    | 701305    |
| Prominin 1                                               | PROM1   | 714610    |
| Promyelocytic leukemia                                   | PML     | 700379    |
| Propionyl-coa carboxylase beta subunit                   | PCCB    | 716964    |
| Proprotein convertase subtilisin/kexin type 7            | PCSK7   | 697567    |
| Prosaposin                                               | PSAP    | 709510    |
| Prostaglandin E synthase 3                               | PTGES3  | 713353    |
| Protease, serine 37                                      | PRSS37  | 694908    |
| Proteasomal ATPase associated factor 1                   | PAAF1   | 718755    |
| Proteasome (prosome, macropain) assembly chaperone 1     | PSMG1   | 715758    |
| Proteasome (prosome, macropain) assembly chaperone 2     | PSMG2   | 717110    |
| Proteasome 26S subunit, ATPase 4                         | PSMC4   | 699847    |
| Proteasome 26S subunit, non-ATPase 1                     | PSMD1   | 711724    |
| Proteasome 26S subunit, non-ATPase 10                    | PSMD10  | 703596    |
| Proteasome 26S subunit, non-ATPase 12                    | PSMD12  | 718756    |
| Proteasome 26S subunit, non-ATPase 14                    | PSMD14  | 701063    |



|                                                                              |          |           |
|------------------------------------------------------------------------------|----------|-----------|
| Proteasome 26S subunit, non-ATPase 4                                         | PSMD4    | 100192390 |
| Proteasome 26S subunit, non-ATPase 6                                         | PSMD6    | 698601    |
| Proteasome 26S subunit, non-ATPase 7                                         | PSMD7    | 705581    |
| Proteasome activator subunit 1                                               | PSME1    | 714364    |
| Proteasome activator subunit 2                                               | PSME2    | 715288    |
| Proteasome subunit alpha 1                                                   | PSMA1    | 701029    |
| Proteasome subunit alpha 2                                                   | PSMA2    | 701683    |
| Proteasome subunit alpha 3                                                   | PSMA3    | 700251    |
| Proteasome subunit alpha 4                                                   | PSMA4    | 710417    |
| Proteasome subunit alpha 5                                                   | PSMA5    | 698435    |
| Proteasome subunit beta 1                                                    | PSMB1    | 696133    |
| Proteasome subunit beta 2                                                    | PSMB2    | 712193    |
| Proteasome subunit beta 4                                                    | PSMB4    | 710734    |
| Proteasome subunit beta 6                                                    | PSMB6    | 710028    |
| Proteasome subunit beta 7                                                    | PSMB7    | 694567    |
| Proteasome subunit beta 9                                                    | PSMB9    | 716980    |
| Protection of telomeres 1                                                    | POT1     | 696751    |
| Protein arginine methyltransferase 5                                         | PRMT5    | 712718    |
| Protein associated with topoisomerase II homolog 1 (yeast)                   | PATL1    | 699207    |
| Protein disulfide isomerase family A member 6                                | PDIA6    | 706781    |
| Protein inhibitor of activated STAT 2                                        | PIAS2    | 696737    |
| Protein kinase C and casein kinase substrate in neurons 1                    | PACSLN1  | 718624    |
| Protein kinase C, alpha                                                      | PRKCA    | 718412    |
| Protein kinase C, beta                                                       | PRKCB    | 701195    |
| Protein kinase, AMP-activated, beta 1 non-catalytic subunit                  | PRKAB1   | 695737    |
| Protein kinase, interferon-inducible double stranded RNA dependent activator | PRKRA    | 703063    |
| Protein O-glucosyltransferase 1                                              | POGLUT1  | 712357    |
| Protein O-linked mannose N-acetylglucosaminyltransferase 1 (beta 1,2-)       | POMGNT1  | 707205    |
| Protein phosphatase 1 regulatory subunit 12B                                 | PPP1R12B | 705775    |
| Protein phosphatase 1 regulatory subunit 15A                                 | PPP1R15A | 718350    |
| Protein phosphatase 1 regulatory subunit 16B                                 | PPP1R16B | 693349    |
| Protein phosphatase 1 regulatory subunit 21                                  | PPP1R21  | 715917    |
| Protein phosphatase 1 regulatory subunit 35                                  | PPP1R35  | 712067    |
| Protein phosphatase 1, catalytic subunit, gamma isozyme                      | PPP1CC   | 709935    |
| Protein phosphatase 2 regulatory subunit B', gamma                           | PPP2R5C  | 718894    |
| Protein phosphatase 2 regulatory subunit B'', gamma                          | PPP2R3C  | 694616    |
| Protein phosphatase 3, catalytic subunit, beta isozyme                       | PPP3CB   | 706955    |
| Protein phosphatase 3, catalytic subunit, gamma isozyme                      | PPP3CC   | 708233    |
| Protein phosphatase 4 catalytic subunit                                      | PPP4C    | 708510    |
| Protein phosphatase 4 regulatory subunit 3B                                  | PPP4R3B  | 718961    |
| Protein phosphatase 4, regulatory subunit 1                                  | PPP4R1   | 705451    |
| Protein phosphatase, Mg <sup>2+</sup> /Mn <sup>2+</sup> dependent 1A         | PPM1A    | 702987    |
| Protein phosphatase, Mg <sup>2+</sup> /Mn <sup>2+</sup> dependent 1F         | PPM1F    | 698441    |
| Protein phosphatase, Mg <sup>2+</sup> /Mn <sup>2+</sup> dependent 1G         | PPM1G    | 700695    |
| Protein S (alpha)                                                            | PROS1    | 694845    |
| Protein serine kinase H2                                                     | PSKH2    | 693701    |

|                                                                                                     |           |           |
|-----------------------------------------------------------------------------------------------------|-----------|-----------|
| Protein tyrosine phosphatase domain containing 1                                                    | PTPDC1    | 707878    |
| Protein tyrosine phosphatase type IVA, member 2                                                     | PTP4A2    | 706489    |
| Protein tyrosine phosphatase, non-receptor type 1                                                   | PTPN1     | 702016    |
| Protein tyrosine phosphatase, non-receptor type 12                                                  | PTPN12    | 721538    |
| Protein tyrosine phosphatase, non-receptor type 20                                                  | PTPN20    | 711276    |
| Protein tyrosine phosphatase, non-receptor type 23                                                  | PTPN23    | 711601    |
| Protein tyrosine phosphatase, receptor type, D                                                      | PTPRD     | 714954    |
| Protein tyrosine phosphatase, receptor type, G                                                      | PTPRG     | 703937    |
| Protein-L-isoaspartate (D-aspartate) O-methyltransferase                                            | PCMT1     | 695893    |
| Proteolipid protein 2 (colonic epithelium-enriched)                                                 | PLP2      | 712869    |
| Protocadherin beta 4                                                                                | PCDHB4    | 700373    |
| Pterin-4 alpha-carbinolamine dehydratase/dimerization cofactor of hepatocyte nuclear factor 1 alpha | PCBD1     | 709875    |
| Pumilio RNA binding family member 1                                                                 | PUM1      | 704848    |
| Pumilio RNA binding family member 2                                                                 | PUM2      | 701782    |
| Purinergic receptor P2Y, G-protein coupled, 11                                                      | P2RY11    | 100533473 |
| PWP2 periodic tryptophan protein homolog (yeast)                                                    | PWP2      | 722216    |
| PYD and CARD domain containing                                                                      | PYCARD    | 713563    |
| PYM homolog 1, exon junction complex associated factor                                              | PYM1      | 708148    |
| Pyridine nucleotide-disulphide oxidoreductase domain 2                                              | PYROXD2   | 707797    |
| Pyruvate carboxylase                                                                                | PC        | 713103    |
| Pyruvate dehydrogenase (lipoamide) alpha 1                                                          | PDHA1     | 100423990 |
| Pyruvate dehydrogenase (lipoamide) beta                                                             | PDHB      | 574227    |
| Pyruvate dehydrogenase kinase, isozyme 2                                                            | PDK2      | 704169    |
| Pyruvate dehydrogenase phosphatase regulatory subunit                                               | PDPR      | 709861    |
| Quiescin sulfhydryl oxidase 1                                                                       | QSOX1     | 718589    |
| R3H domain and coiled-coil containing 1 like                                                        | R3HCC1L   | 707600    |
| Rab geranylgeranyltransferase, beta subunit                                                         | RABGGTB   | 705421    |
| Rab interacting lysosomal protein-like 2                                                            | RILPL2    | 704853    |
| RAB, member of RAS oncogene family-like 2B                                                          | RABL2B    | 716615    |
| RAB11 family interacting protein 4 (class II)                                                       | RAB11FIP4 | 717629    |
| RAB11A, member RAS oncogene family                                                                  | RAB11A    | 714144    |
| RAB13, member RAS oncogene family                                                                   | RAB13     | 716156    |
| RAB14, member RAS oncogene family                                                                   | RAB14     | 699837    |
| RAB23, member RAS oncogene family                                                                   | RAB23     | 712860    |
| RAB25, member RAS oncogene family                                                                   | RAB25     | 718131    |
| RAB28, member RAS oncogene family                                                                   | RAB28     | 713566    |
| RAB2A, member RAS oncogene family                                                                   | RAB2A     | 699383    |
| RAB3 gtpase activating non-catalytic protein subunit 2                                              | RAB3GAP2  | 706252    |
| RAB30, member RAS oncogene family                                                                   | RAB30     | 701550    |
| RAB32, member RAS oncogene family                                                                   | RAB32     | 702431    |
| RAB35, member RAS oncogene family                                                                   | RAB35     | 698400    |
| RAB3A interacting protein                                                                           | RAB3IP    | 717215    |
| RAB3D, member RAS oncogene family                                                                   | RAB3D     | 714222    |
| RAB5B, member RAS oncogene family                                                                   | RAB5B     | 708347    |
| RAB5C, member RAS oncogene family                                                                   | RAB5C     | 709308    |
| RAB6A, member RAS oncogene family                                                                   | RAB6A     | 718717    |
| RAB8B, member RAS oncogene family                                                                   | RAB8B     | 705597    |

|                                                                                         |          |           |
|-----------------------------------------------------------------------------------------|----------|-----------|
| RAB9A, member RAS oncogene family                                                       | RAB9A    | 720906    |
| Rabphilin 3A-like (without C2 domains)                                                  | RPH3AL   | 106993852 |
| RAD17 checkpoint clamp loader component                                                 | RAD17    | 700116    |
| RAD50 interactor 1                                                                      | RINT1    | 698414    |
| RAD51 paralog C                                                                         | RAD51C   | 714828    |
| RAD9 checkpoint clamp component A                                                       | RAD9A    | 712345    |
| RAD9-HUS1-RAD1 interacting nuclear orphan 1                                             | RHNO1    | 709008    |
| Radical S-adenosyl methionine domain containing 1                                       | RSAD1    | 705626    |
| Radixin                                                                                 | RDX      | 709018    |
| Raf-1 proto-oncogene, serine/threonine kinase                                           | RAF1     | 694725    |
| Raftlin family member 2                                                                 | RFTN2    | 697562    |
| Raftlin, lipid raft linker 1                                                            | RFTN1    | 695142    |
| Ral GEF with PH domain and SH3 binding motif 1                                          | RALGPS1  | 708253    |
| Ral gtpase activating protein, alpha subunit 1 (catalytic)                              | RALGAPA1 | 695674    |
| Ral gtpase activating protein, beta subunit (non-catalytic)                             | RALGAPB  | 705742    |
| Ral guanine nucleotide dissociation stimulator-like 1                                   | RGL1     | 717554    |
| RALY heterogeneous nuclear ribonucleoprotein                                            | RALY     | 713317    |
| RAN binding protein 10                                                                  | RANBP10  | 700911    |
| RAN binding protein 2                                                                   | RANBP2   | 694823    |
| Ran gtpase activating protein 1                                                         | RANGAP1  | 710698    |
| RAN guanine nucleotide release factor                                                   | RANGRF   | 717206    |
| RAN, member RAS oncogene family                                                         | RAN      | 709200    |
| Ranbp-type and C3HC4-type zinc finger containing 1                                      | RBCK1    | 714692    |
| Rap guanine nucleotide exchange factor 2                                                | RAPGEF2  | 704717    |
| Rap guanine nucleotide exchange factor 2                                                | RAPGEF2  | 704717    |
| RAP1, GTP-GDP dissociation stimulator 1                                                 | RAP1GDS1 | 706303    |
| RAP2A, member of RAS oncogene family                                                    | RAP2A    | 697215    |
| Ras and Rab interactor 1                                                                | RIN1     | 714321    |
| Ras and Rab interactor 2                                                                | RIN2     | 702775    |
| Ras and Rab interactor 3                                                                | RIN3     | 698125    |
| Ras homolog family member A                                                             | RHOA     | 706455    |
| Ras homolog family member C                                                             | RHOC     | 706034    |
| Ras homolog family member J                                                             | RHOJ     | 705603    |
| RAS p21 protein activator (gtpase activating protein) 1                                 | RASA1    | 694085    |
| RAS, dexamethasone-induced 1                                                            | RASD1    | 698839    |
| RAS-like family 10 member A                                                             | RASL10A  | 714587    |
| Ras-like without CAAX 1                                                                 | RIT1     | 717985    |
| Ras-related C3 botulinum toxin substrate 2 (rho family, small GTP binding protein Rac2) | RAC2     | 696709    |
| Ras-related GTP binding A                                                               | RRAGA    | 100430225 |
| Ras-related GTP binding C                                                               | RRAGC    | 715549    |
| RB1 inducible coiled-coil 1                                                             | RB1CC1   | 710330    |
| RBPJ interacting and tubulin associated 1                                               | RITA1    | 712837    |
| Rearranged L-myc fusion                                                                 | RLF      | 693503    |
| Receptor (chemosensory) transporter protein 3                                           | RTP3     | 713050    |
| Receptor interacting serine/threonine kinase 3                                          | RIPK3    | 716138    |
| Receptor interacting serine/threonine kinase 4                                          | RIPK4    | 715077    |
| Receptor tyrosine kinase-like orphan receptor 2                                         | ROR2     | 715482    |

|                                                                                       |          |        |
|---------------------------------------------------------------------------------------|----------|--------|
| Recq helicase-like                                                                    | RECQL    | 705871 |
| Regucalcin                                                                            | RGN      | 705733 |
| Regulation of nuclear pre-mrna domain containing 1A                                   | RPRD1A   | 709217 |
| Regulator of calcineurin 1                                                            | RCAN1    | 697108 |
| Regulator of cell cycle                                                               | RGCC     | 698962 |
| Regulator of chromosome condensation (RCC1) and BTB (POZ) domain containing protein 1 | RCBTB1   | 706627 |
| Regulator of G-protein signaling 10                                                   | RGS10    | 703125 |
| Regulator of microtubule dynamics 1                                                   | RMDN1    | 694237 |
| Regulatory factor X associated ankyrin containing protein                             | RFXANK   | 719706 |
| Related RAS viral (r-ras) oncogene homolog 2                                          | RRAS2    | 699700 |
| Relaxin/insulin-like family peptide receptor 4                                        | RXFP4    | 718025 |
| REM2 and RAB-like small gtpase 1                                                      | RSG1     | 697922 |
| Replication protein A1                                                                | RPA1     | 721272 |
| Replication protein A2                                                                | RPA2     | 716612 |
| Replication protein A3                                                                | RPA3     | 696248 |
| Replication timing regulatory factor 1                                                | RIF1     | 694817 |
| Required for meiotic nuclear division 5 homolog B                                     | RMND5B   | 701840 |
| Resistin                                                                              | RETN     | 708781 |
| Ret proto-oncogene                                                                    | RET      | 703466 |
| Reticulon 4                                                                           | RTN4     | 619181 |
| Retinoblastoma binding protein 4                                                      | RBBP4    | 708710 |
| Retinoblastoma binding protein 8                                                      | RBBP8    | 677718 |
| Retinoic acid induced 14                                                              | RAI14    | 698620 |
| Retinoic acid induced 2                                                               | RAI2     | 693329 |
| Retinol dehydrogenase 5 (11-cis/9-cis)                                                | RDH5     | 709644 |
| Reversion-inducing-cysteine-rich protein with kazal motifs                            | RECK     | 694043 |
| RFT1 homolog                                                                          | RFT1     | 694586 |
| Rh family, C glycoprotein                                                             | RHCG     | 664731 |
| Rho family gtpase 3                                                                   | RND3     | 694168 |
| Rho GDP dissociation inhibitor (GDI) beta                                             | ARHGDIB  | 702320 |
| Rho gtpase activating protein 10                                                      | ARHGAP10 | 708458 |
| Rho gtpase activating protein 12                                                      | ARHGAP12 | 696402 |
| Rho gtpase activating protein 18                                                      | ARHGAP18 | 711107 |
| Rho gtpase activating protein 30                                                      | ARHGAP30 | 718236 |
| Rho gtpase activating protein 9                                                       | ARHGAP9  | 711684 |
| Rho guanine nucleotide exchange factor (GEF) 3                                        | ARHGEF3  | 704764 |
| Rho guanine nucleotide exchange factor 1                                              | ARHGEF1  | 722198 |
| Rho guanine nucleotide exchange factor 10                                             | ARHGEF10 | 722745 |
| Rho guanine nucleotide exchange factor 5                                              | ARHGEF5  | 705891 |
| Rho/Rac guanine nucleotide exchange factor 2                                          | ARHGEF2  | 719369 |
| Rhomboid 5 homolog 2 (Drosophila)                                                     | RHBDF2   | 707033 |
| Rhomboid domain containing 1                                                          | RHBDD1   | 707982 |
| Rhomboid domain containing 3                                                          | RHBDD3   | 714479 |
| Rho-related BTB domain containing 1                                                   | RHOBTB1  | 699132 |
| Rhotekin                                                                              | RTKN     | 708722 |
| Ribonuclease H2 subunit B                                                             | RNASEH2B | 707995 |
| Ribonuclease P/MRP 14kda subunit                                                      | RPP14    | 706788 |

|                                                          |         |           |
|----------------------------------------------------------|---------|-----------|
| Ribonuclease P/MRP 21kda subunit                         | RPP21   | 713056    |
| Ribonuclease P/MRP 30kda subunit                         | RPP30   | 696537    |
| Ribonuclease P/MRP 40kda subunit                         | RPP40   | 710505    |
| Ribonuclease T2                                          | RNASET2 | 706533    |
| Ribonuclease, rnase A family, 4                          | RNASE4  | 703903    |
| Ribonuclease, rnase A family, 9 (non-active)             | RNASE9  | 703346    |
| Ribonuclease/angiogenin inhibitor 1                      | RNH1    | 720791    |
| Ribonucleoprotein, PTB-binding 1                         | RAVER1  | 715250    |
| Ribonucleotide reductase M1                              | RRM1    | 717990    |
| Ribonucleotide reductase M2                              | RRM2    | 703138    |
| Ribophorin I                                             | RPN1    | 705437    |
| Ribophorin II                                            | RPN2    | 708971    |
| Ribosomal modification protein rimk-like family member A | RIMKLA  | 699767    |
| Ribosomal protein l10a                                   | RPL10A  | 718783    |
| Ribosomal protein L17                                    | RPL17   | 698967    |
| Ribosomal protein L22                                    | RPL22   | 703050    |
| Ribosomal protein L23                                    | RPL23   | 694719    |
| Ribosomal protein l23a                                   | RPL23A  | 710490    |
| Ribosomal protein L24                                    | RPL24   | 702381    |
| Ribosomal protein L26 like 1                             | RPL26L1 | 703230    |
| Ribosomal protein L27                                    | RPL27   | 712352    |
| Ribosomal protein L29                                    | RPL29   | 698602    |
| Ribosomal protein L3 like                                | RPL3L   | 693424    |
| Ribosomal protein L4                                     | RPL4    | 710590    |
| Ribosomal protein l7a                                    | RPL7A   | 722215    |
| Ribosomal protein L8                                     | RPL8    | 708535    |
| Ribosomal protein S10                                    | RPS10   | 718606    |
| Ribosomal protein S13                                    | RPS13   | 697513    |
| Ribosomal protein S14                                    | RPS14   | 710901    |
| Ribosomal protein S15                                    | RPS15   | 707241    |
| Ribosomal protein S16                                    | RPS16   | 697219    |
| Ribosomal protein S17-like                               | RPS17L  | 100425105 |
| Ribosomal protein S2                                     | RPS2    | 693615    |
| Ribosomal protein S27                                    | RPS27   | 106992521 |
| Ribosomal protein S27 like                               | RPS27L  | 705483    |
| Ribosomal protein s27a                                   | RPS27A  | 718909    |
| Ribosomal protein S28                                    | RPS28   | 707133    |
| Ribosomal protein S4, X-linked                           | RPS4X   | 699397    |
| Ribosomal protein S4, X-linked                           | RPS4X   | 699397    |
| Ribosomal protein S5                                     | RPS5    | 711259    |
| Ribosomal protein S6 kinase, 90kda, polypeptide 1        | RPS6KA1 | 714794    |
| Ribosomal protein S6 kinase, 90kda, polypeptide 4        | RPS6KA4 | 717574    |
| Ribosomal protein S7                                     | RPS7    | 721900    |
| Ribosomal protein S8                                     | RPS8    | 703957    |
| Ribosomal protein S9                                     | RPS9    | 694053    |
| Ribosomal protein, large, P0                             | RPLP0   | 574363    |
| Ribosomal protein, large, P1                             | RPLP1   | 695442    |
| Ribosomal protein, large, P2                             | RPLP2   | 700698    |

|                                                                                       |        |           |
|---------------------------------------------------------------------------------------|--------|-----------|
| Ribosomal RNA adenine dimethylase domain containing 1                                 | RRNAD1 | 718599    |
| Ribosomal RNA processing 8, methyltransferase, homolog (yeast)                        | RRP8   | 712011    |
| Ribosomal RNA processing 9, small subunit (SSU) processome component, homolog (yeast) | RRP9   | 699421    |
| Ribosome production factor 1 homolog                                                  | RPF1   | 710286    |
| Ribosome production factor 2 homolog                                                  | RPF2   | 696378    |
| Ring finger and WD repeat domain 2, E3 ubiquitin protein ligase                       | RFWD2  | 708802    |
| Ring finger protein 112                                                               | RNF112 | 703312    |
| Ring finger protein 121                                                               | RNF121 | 718216    |
| Ring finger protein 14                                                                | RNF14  | 705363    |
| Ring finger protein 149                                                               | RNF149 | 710926    |
| Ring finger protein 185                                                               | RNF185 | 718351    |
| Ring finger protein 20                                                                | RNF20  | 713614    |
| Ring finger protein 208                                                               | RNF208 | 705563    |
| Ring finger protein 217                                                               | RNF217 | 716647    |
| Ring finger protein 219                                                               | RNF219 | 697577    |
| Ring finger protein 26                                                                | RNF26  | 704755    |
| Ring finger protein 38                                                                | RNF38  | 693346    |
| Ring finger protein 40, E3 ubiquitin protein ligase                                   | RNF40  | 713148    |
| Ring finger protein 41, E3 ubiquitin protein ligase                                   | RNF41  | 711969    |
| Ring finger protein 5, E3 ubiquitin protein ligase                                    | RNF5   | 717234    |
| Ring finger protein, transmembrane 1                                                  | RNFT1  | 712052    |
| RIO kinase 2                                                                          | RIOK2  | 700738    |
| RNA 2',3'-cyclic phosphate and 5'-OH ligase                                           | RTCB   | 717258    |
| RNA binding motif (RNP1, RRM) protein 3                                               | RBM3   | 710689    |
| RNA binding motif protein 15                                                          | RBM15  | 701414    |
| RNA binding motif protein 17                                                          | RBM17  | 712996    |
| RNA binding motif protein 18                                                          | RBM18  | 698457    |
| RNA binding motif protein 19                                                          | RBM19  | 715724    |
| RNA binding motif protein 22                                                          | RBM22  | 712713    |
| RNA binding motif protein 39                                                          | RBM39  | 704198    |
| RNA binding motif protein 41                                                          | RBM41  | 701761    |
| RNA binding motif protein 42                                                          | RBM42  | 709852    |
| RNA binding motif protein 45                                                          | RBM45  | 702714    |
| RNA binding motif protein 5                                                           | RBM5   | 704114    |
| RNA binding motif protein 7                                                           | RBM7   | 695401    |
| RNA binding motif protein, X-linked 2                                                 | RBMX2  | 703472    |
| RNA binding motif, single stranded interacting protein 1                              | RBMS1  | 703608    |
| RNA binding motif, single stranded interacting protein 2                              | RBMS2  | 713163    |
| RNA binding protein, fox-1 homolog (C. Elegans) 2                                     | RBFOX2 | 693642    |
| RNA exonuclease 2                                                                     | REXO2  | 695292    |
| RNA polymerase II associated protein 3                                                | RPAP3  | 703749    |
| RNA pseudouridylate synthase domain containing 3                                      | RPUSD3 | 700349    |
| Rotatin                                                                               | RTTN   | 703989    |
| RPTOR independent companion of MTOR, complex 2                                        | RICTOR | 694915    |
| RRN3 homolog, RNA polymerase I transcription factor                                   | RRN3   | 713500    |
| Ruvb-like AAA ATPase 2                                                                | RUVBL2 | 100428794 |
| RWD domain containing 3                                                               | RWDD3  | 709817    |

|                                                                                                                  |           |           |
|------------------------------------------------------------------------------------------------------------------|-----------|-----------|
| RWD domain containing 4                                                                                          | RWDD4     | 708882    |
| SAC1 suppressor of actin mutations 1-like (yeast)                                                                | SACM1L    | 714107    |
| SAMM50 sorting and assembly machinery component                                                                  | SAMM50    | 715675    |
| SAP30 binding protein                                                                                            | SAP30BP   | 703077    |
| Sarcoglycan epsilon                                                                                              | SGCE      | 700104    |
| Sarcoglycan zeta                                                                                                 | SGCZ      | 100430474 |
| Sarcolemma associated protein                                                                                    | SLMAP     | 703086    |
| Schlafen like 1                                                                                                  | SLFNL1    | 695605    |
| Scm-like with four mbt domains 1                                                                                 | SFMBT1    | 694961    |
| SCY1-like, kinase-like 2                                                                                         | SCYL2     | 695284    |
| SCY1-like, kinase-like 3                                                                                         | SCYL3     | 701768    |
| SEC11 homolog A, signal peptidase complex subunit                                                                | SEC11A    | 695951    |
| SEC14 and spectrin domain containing 1                                                                           | SESTD1    | 703755    |
| SEC14-like lipid binding 1                                                                                       | SEC14L1   | 708394    |
| SEC22 homolog A, vesicle trafficking protein                                                                     | SEC22A    | 715277    |
| SEC22 homolog C, vesicle trafficking protein                                                                     | SEC22C    | 716351    |
| Sec23 homolog A, COPII coat complex component                                                                    | SEC23A    | 698500    |
| Sec23 homolog B, COPII coat complex component                                                                    | SEC23B    | 698440    |
| SEC23 interacting protein                                                                                        | SEC23IP   | 704155    |
| SEC24 homolog A, COPII coat complex component                                                                    | SEC24A    | 711109    |
| SEC24 homolog C, COPII coat complex component                                                                    | SEC24C    | 714688    |
| SEC24 homolog D, COPII coat complex component                                                                    | SEC24D    | 707521    |
| SEC31 homolog A, COPII coat complex component                                                                    | SEC31A    | 693687    |
| Sec61 translocon alpha 1 subunit                                                                                 | SEC61A1   | 709787    |
| Sec61 translocon alpha 2 subunit                                                                                 | SEC61A2   | 100427731 |
| Sec61 translocon beta subunit                                                                                    | SEC61B    | 717815    |
| Sec61 translocon gamma subunit                                                                                   | SEC61G    | 716898    |
| SECIS binding protein 2                                                                                          | SECISBP2  | 697442    |
| SECIS binding protein 2-like                                                                                     | SECISBP2L | 714764    |
| Secreted frizzled-related protein 1                                                                              | SFRP1     | 702876    |
| Secretion associated, Ras related gtpase 1A                                                                      | SAR1A     | 711277    |
| Secretory carrier membrane protein 2                                                                             | SCAMP2    | 709720    |
| Sedoheptulokinase                                                                                                | SHPK      | 721465    |
| Selenophosphate synthetase 1                                                                                     | SEPHS1    | 696038    |
| Selenoprotein K                                                                                                  | SELK      | 693421    |
| Selenoprotein M                                                                                                  | SELM      | 718290    |
| Selenoprotein O                                                                                                  | SELO      | 715604    |
| Selenoprotein W, 1                                                                                               | SEPW1     | 718370    |
| Sema domain, immunoglobulin domain (Ig), transmembrane domain (TM) and short cytoplasmic domain, (semaphorin) 4D | SEMA4D    | 697697    |
| Sepiapterin reductase (7,8-dihydrobiopterin:NADP+ oxidoreductase)                                                | SPR       | 705317    |
| Serglycin                                                                                                        | SRGN      | 712299    |
| Serine carboxypeptidase 1                                                                                        | SCPEP1    | 708197    |
| Serine incorporator 1                                                                                            | SERINC1   | 713999    |
| Serine incorporator 2                                                                                            | SERINC2   | 705303    |
| Serine palmitoyltransferase small subunit A                                                                      | SPTSSA    | 717580    |
| Serine/arginine repetitive matrix 1                                                                              | SRRM1     | 712258    |

|                                                               |          |        |
|---------------------------------------------------------------|----------|--------|
| Serine/arginine-rich splicing factor 1                        | SRSF1    | 713958 |
| Serine/arginine-rich splicing factor 11                       | SRSF11   | 702698 |
| Serine/arginine-rich splicing factor 12                       | SRSF12   | 700497 |
| Serine/arginine-rich splicing factor 3                        | SRSF3    | 719123 |
| Serine/arginine-rich splicing factor 4                        | SRSF4    | 717401 |
| Serine/arginine-rich splicing factor 7                        | SRSF7    | 713388 |
| Serine/arginine-rich splicing factor 8                        | SRSF8    | 699079 |
| Serine/threonine kinase 11 interacting protein                | STK11IP  | 704531 |
| Serine/threonine kinase 24                                    | STK24    | 697841 |
| Serine/threonine kinase 25                                    | STK25    | 701297 |
| Serine/threonine kinase 3                                     | STK3     | 707425 |
| Serine/threonine kinase 31                                    | STK31    | 703886 |
| Serine/threonine kinase 36                                    | STK36    | 699940 |
| Serine/threonine kinase 38                                    | STK38    | 719169 |
| Serologically defined colon cancer antigen 3                  | SDCCAG3  | 721750 |
| Serpin peptidase inhibitor, clade B (ovalbumin), member 7     | SERPINB7 | 701671 |
| Serpin peptidase inhibitor, clade G (C1 inhibitor), member 1  | SERPING1 | 703928 |
| Serpin peptidase inhibitor, clade I (neuroserpin), member 1   | SERPINI1 | 699483 |
| Serrate, RNA effector molecule                                | SRRT     | 713235 |
| Serum amyloid A like 1                                        | SAAL1    | 695747 |
| Serum/glucocorticoid regulated kinase 1                       | SGK1     | 713082 |
| Sestrin 2                                                     | SESN2    | 716904 |
| Sestrin 3                                                     | SESN3    | 699329 |
| SET and MYND domain containing 2                              | SMYD2    | 709375 |
| SET domain containing (lysine methyltransferase) 7            | SETD7    | 700426 |
| SET domain containing 2                                       | SETD2    | 711825 |
| SET domain containing 4                                       | SETD4    | 696003 |
| SET domain containing 5                                       | SETD5    | 704174 |
| SET domain, bifurcated 1                                      | SETDB1   | 716141 |
| Sex comb on midleg homolog 1 (Drosophila)                     | SCMH1    | 695722 |
| Sex comb on midleg-like 1 (Drosophila)                        | SCML1    | 714239 |
| SFI1 centrin binding protein                                  | SFI1     | 716833 |
| SFT2 domain containing 3                                      | SFT2D3   | 699830 |
| SGT1 homolog, MIS12 kinetochore complex assembly cochaperone  | SUGT1    | 694046 |
| SH2 domain containing 3C                                      | SH2D3C   | 699706 |
| SH2 domain containing 3C                                      | SH2D3C   | 699706 |
| SH2B adaptor protein 2                                        | SH2B2    | 714861 |
| SH3 and cysteine rich domain                                  | STAC     | 707350 |
| SH3 domain containing ring finger 1                           | SH3RF1   | 694082 |
| SH3-domain binding protein 4                                  | SH3BP4   | 693393 |
| SH3-domain GRB2-like endophilin B1                            | SH3GLB1  | 712393 |
| SH3-domain GRB2-like endophilin B2                            | SH3GLB2  | 716994 |
| SHANK associated RH domain interactor                         | SHARPIN  | 713534 |
| SHC (Src homology 2 domain containing) transforming protein 1 | SHC1     | 718982 |
| SHOC2 leucine-rich repeat scaffold protein                    | SHOC2    | 695572 |
| Siah E3 ubiquitin protein ligase 1                            | SIAH1    | 716629 |
| Siah E3 ubiquitin protein ligase 1                            | SIAH1    | 716629 |
| Sideroflexin 4                                                | SFXN4    | 702765 |



|                                                                     |         |           |
|---------------------------------------------------------------------|---------|-----------|
| Sideroflexin 4                                                      | SFXN4   | 702765    |
| Sigma non-opioid intracellular receptor 1                           | SIGMAR1 | 700469    |
| Signal peptidase complex subunit 1                                  | SPCS1   | 696426    |
| Signal peptidase complex subunit 2                                  | SPCS2   | 694179    |
| Signal peptide peptidase like 3                                     | SPPL3   | 700898    |
| Signal peptide, CUB domain, EGF-like 2                              | SCUBE2  | 708152    |
| Signal recognition particle 68kda                                   | SRP68   | 705568    |
| Signal sequence receptor, alpha                                     | SSR1    | 693818    |
| Signal sequence receptor, beta (translocon-associated protein beta) | SSR2    | 719383    |
| Signal sequence receptor, delta                                     | SSR4    | 697266    |
| Signal transducer and activator of transcription 1                  | STAT1   | 693650    |
| Signal transducer and activator of transcription 4                  | STAT4   | 693854    |
| Signal transducer and activator of transcription 5A                 | STAT5A  | 574129    |
| Sin3A associated protein 25kda                                      | SAP25   | 106997575 |
| Sin3A associated protein 30kda                                      | SAP30   | 696519    |
| Single stranded DNA binding protein 4                               | SSBP4   | 719496    |
| Single-pass membrane protein with coiled-coil domains 4             | SMCO4   | 695982    |
| Single-stranded DNA binding protein 1, mitochondrial                | SSBP1   | 694459    |
| Sirtuin 4                                                           | SIRT4   | 720498    |
| Sirtuin 7                                                           | SIRT7   | 715069    |
| SIVA1, apoptosis-inducing factor                                    | SIVA1   | 706688    |
| SIX homeobox 5                                                      | SIX5    | 715373    |
| SKI-like proto-oncogene                                             | SKIL    | 696680    |
| Slingshot protein phosphatase 2                                     | SSH2    | 711898    |
| SLIT and NTRK like family member 1                                  | SLITRK1 | 699217    |
| SLU7 homolog, splicing factor                                       | SLU7    | 696023    |
| SLX1 homolog A, structure-specific endonuclease subunit             | SLX1A   | 709225    |
| SMAD family member 1                                                | SMAD1   | 574340    |
| Smad nuclear interacting protein 1                                  | SNIP1   | 713733    |
| Small arfgap2                                                       | SMAP2   | 694502    |
| Small integral membrane protein 13                                  | SMIM13  | 703387    |
| Small integral membrane protein 15                                  | SMIM15  | 693623    |
| Small integral membrane protein 15                                  | SMIM15  | 693623    |
| Small integral membrane protein 19                                  | SMIM19  | 705371    |
| Small nuclear ribonucleoprotein D1 polypeptide                      | SNRPD1  | 698965    |
| Small nuclear ribonucleoprotein D2 polypeptide                      | SNRPD2  | 715183    |
| Small nuclear ribonucleoprotein polypeptide A                       | SNRPA   | 702730    |
| Small nuclear ribonucleoprotein polypeptide B                       | SNRPB2  | 695387    |
| Small nuclear ribonucleoprotein polypeptide G                       | SNRPG   | 702586    |
| Small nuclear ribonucleoprotein polypeptides B and B1               | SNRPB   | 716578    |
| Small nuclear ribonucleoprotein, U1 70kda subunit                   | SNRNP70 | 719090    |
| Small nuclear ribonucleoprotein, U11/U12 35kda subunit              | SNRNP35 | 702933    |
| Small nuclear ribonucleoprotein, U11/U12 35kda subunit              | SNRNP35 | 702933    |
| Small nuclear ribonucleoprotein, U11/U12 35kda subunit              | SNRNP35 | 702933    |
| Small nuclear ribonucleoprotein, U4/U6.U5 27kda subunit             | SNRNP27 | 708670    |
| Small ubiquitin-like modifier 1                                     | SUMO1   | 703644    |
| Small ubiquitin-like modifier 1                                     | SUMO1   | 703644    |
| Small ubiquitin-like modifier 2                                     | SUMO2   | 705512    |

|                                                                                             |          |        |
|---------------------------------------------------------------------------------------------|----------|--------|
| Small vasohibin binding protein                                                             | SVBP     | 698308 |
| SMG5 nonsense mediated mrna decay factor                                                    | SMG5     | 719446 |
| SMG7 nonsense mediated mrna decay factor                                                    | SMG7     | 717603 |
| SMG8 nonsense mediated mrna decay factor                                                    | SMG8     | 711172 |
| Smu-1 suppressor of mec-8 and unc-52 homolog (C. Elegans)                                   | SMU1     | 703656 |
| SMYD family member 5                                                                        | SMYD5    | 705926 |
| SNAP-associated protein                                                                     | SNAPIN   | 715546 |
| SNF related kinase                                                                          | SNRK     | 715803 |
| SNRPN upstream reading frame                                                                | SNURF    | 711028 |
| Sodium channel modifier 1                                                                   | SCNM1    | 709922 |
| Sodium channel, non voltage gated 1 beta subunit                                            | SCNN1B   | 700093 |
| Sodium channel, voltage gated, type X alpha subunit                                         | SCN10A   | 694962 |
| Solute carrier family 10 member 3                                                           | SLC10A3  | 700759 |
| Solute carrier family 12 (sodium/potassium/chloride transporter), member 2                  | SLC12A2  | 704672 |
| Solute carrier family 18, subfamily B, member 1                                             | SLC18B1  | 708518 |
| Solute carrier family 2 (facilitated glucose transporter), member 2                         | SLC2A2   | 695538 |
| Solute carrier family 20 (phosphate transporter), member 1                                  | SLC20A1  | 699462 |
| Solute carrier family 20 (phosphate transporter), member 2                                  | SLC20A2  | 705242 |
| Solute carrier family 22 (organic anion/urate transporter), member 12                       | SLC22A12 | 717530 |
| Solute carrier family 22 (organic cation/carnitine transporter), member 5                   | SLC22A5  | 707590 |
| Solute carrier family 22 member 14                                                          | SLC22A14 | 696120 |
| Solute carrier family 22 member 15                                                          | SLC22A15 | 710102 |
| Solute carrier family 22 member 17                                                          | SLC22A17 | 713765 |
| Solute carrier family 25 (aspartate/glutamate carrier), member 12                           | SLC25A12 | 695173 |
| Solute carrier family 25 (carnitine/acylcarnitine translocase), member 20                   | SLC25A20 | 709029 |
| Solute carrier family 25 (mitochondrial carrier, brain), member 14                          | SLC25A14 | 703255 |
| Solute carrier family 25 (mitochondrial carrier; adenine nucleotide translocator), member 5 | SLC25A5  | 693502 |
| Solute carrier family 25 (mitochondrial carrier; citrate transporter), member 1             | SLC25A1  | 719075 |
| Solute carrier family 25 (mitochondrial carrier; ornithine transporter) member 2            | SLC25A2  | 701587 |
| Solute carrier family 25 (mitochondrial carrier; oxoglutarate carrier), member 11           | SLC25A11 | 710569 |
| Solute carrier family 25 (mitochondrial carrier; phosphate carrier), member 24              | SLC25A24 | 694803 |
| Solute carrier family 25 (mitochondrial carrier; phosphate carrier), member 24              | SLC25A24 | 694803 |
| Solute carrier family 25 (mitochondrial carrier; phosphate carrier), member 25              | SLC25A25 | 698216 |
| Solute carrier family 25 (mitochondrial iron transporter), member 37                        | SLC25A37 | 710518 |
| Solute carrier family 25 (pyrimidine nucleotide carrier), member 33                         | SLC25A33 | 722285 |
| Solute carrier family 25 (S-adenosylmethionine carrier), member 26                          | SLC25A26 | 697960 |
| Solute carrier family 25 member 46                                                          | SLC25A46 | 705968 |

|                                                                                          |          |           |
|------------------------------------------------------------------------------------------|----------|-----------|
| Solute carrier family 26 (anion exchanger), member 8                                     | SLC26A8  | 719049    |
| Solute carrier family 29 (equilibrative nucleoside transporter), member 1                | SLC29A1  | 703031    |
| Solute carrier family 30 (zinc transporter), member 5                                    | SLC30A5  | 699371    |
| Solute carrier family 30 (zinc transporter), member 8                                    | SLC30A8  | 701127    |
| Solute carrier family 34 (type II sodium/phosphate cotransporter), member 2              | SLC34A2  | 694217    |
| Solute carrier family 35 (adenosine 3'-phospho 5'-phosphosulfate transporter), member B3 | SLC35B3  | 698416    |
| Solute carrier family 35 (UDP-galactose transporter), member A2                          | SLC35A2  | 711587    |
| Solute carrier family 35 (UDP-glca/UDP-galnac transporter), member D1                    | SLC35D1  | 700175    |
| Solute carrier family 35 member A5                                                       | SLC35A5  | 708401    |
| Solute carrier family 35 member B1                                                       | SLC35B1  | 699953    |
| Solute carrier family 35 member E1                                                       | SLC35E1  | 719559    |
| Solute carrier family 37 (glucose-6-phosphate transporter), member 2                     | SLC37A2  | 712841    |
| Solute carrier family 38 member 1                                                        | SLC38A1  | 702135    |
| Solute carrier family 38 member 5                                                        | SLC38A5  | 710156    |
| Solute carrier family 38 member 6                                                        | SLC38A6  | 704017    |
| Solute carrier family 38 member 9                                                        | SLC38A9  | 706752    |
| Solute carrier family 39 (zinc transporter), member 13                                   | SLC39A13 | 713420    |
| Solute carrier family 39 (zinc transporter), member 3                                    | SLC39A3  | 711564    |
| Solute carrier family 39 (zinc transporter), member 8                                    | SLC39A8  | 710142    |
| Solute carrier family 4 (anion exchanger), member 1 (Diego blood group)                  | SLC4A1   | 100427618 |
| Solute carrier family 4 (anion exchanger), member 1, adaptor protein                     | SLC4A1AP | 701783    |
| Solute carrier family 4 (anion exchanger), member 2                                      | SLC4A2   | 713966    |
| Solute carrier family 4, sodium bicarbonate cotransporter, member 7                      | SLC4A7   | 701925    |
| Solute carrier family 4, sodium borate transporter, member 11                            | SLC4A11  | 718393    |
| Solute carrier family 41 member 3                                                        | SLC41A3  | 716921    |
| Solute carrier family 41 member 3                                                        | SLC41A3  | 716921    |
| Solute carrier family 44 member 3                                                        | SLC44A3  | 714768    |
| Solute carrier family 44 member 4                                                        | SLC44A4  | 715779    |
| Solute carrier family 44 member 4                                                        | SLC44A4  | 715779    |
| Solute carrier family 5 (sodium/glucose cotransporter), member 1                         | SLC5A1   | 717070    |
| Solute carrier family 5 (sodium/multivitamin and iodide cotransporter), member 6         | SLC5A6   | 699074    |
| Solute carrier family 50 (sugar efflux transporter), member 1                            | SLC50A1  | 717424    |
| Solute carrier family 6 (neurotransmitter transporter), member 2                         | SLC6A2   | 613238    |
| Solute carrier family 6 (neurotransmitter transporter), member 7                         | SLC6A7   | 711915    |
| Solute carrier family 7 (anionic amino acid transporter), member 13                      | SLC7A13  | 693964    |
| Solute carrier family 9, subfamily A (NHE6, cation proton antiporter 6), member 6        | SLC9A6   | 710429    |
| Solute carrier family 9, subfamily A (NHE9, cation proton antiporter 9), member 9        | SLC9A9   | 713935    |
| Solute carrier organic anion transporter family member 1C1                               | SLCO1C1  | 704740    |
| Solute carrier organic anion transporter family member 2B1                               | SLCO2B1  | 694829    |

|                                                                     |          |           |
|---------------------------------------------------------------------|----------|-----------|
| SON DNA binding protein                                             | SON      | 704712    |
| Sonic hedgehog                                                      | SHH      | 716553    |
| Sorbin and SH3 domain containing 3                                  | SORBS3   | 716198    |
| Sorting nexin 1                                                     | SNX1     | 706544    |
| Sorting nexin 12                                                    | SNX12    | 696408    |
| Sorting nexin 13                                                    | SNX13    | 714019    |
| Sorting nexin 17                                                    | SNX17    | 701614    |
| Sorting nexin 2                                                     | SNX2     | 700507    |
| Sorting nexin 22                                                    | SNX22    | 706850    |
| Sorting nexin 33                                                    | SNX33    | 706309    |
| Sorting nexin 4                                                     | SNX4     | 716049    |
| SOS Ras/Rho guanine nucleotide exchange factor 2                    | SOS2     | 705601    |
| SOS Ras/Rho guanine nucleotide exchange factor 2                    | SOS2     | 705601    |
| SP110 nuclear body protein                                          | SP110    | 714244    |
| Sp2 transcription factor                                            | SP2      | 694834    |
| Sp3 transcription factor                                            | SP3      | 699901    |
| Sp4 transcription factor                                            | SP4      | 712174    |
| SPARC like 1                                                        | SPARCL1  | 701468    |
| SPARC related modular calcium binding 1                             | SMOC1    | 712994    |
| Spastic paraplegia 11 (autosomal recessive)                         | SPG11    | 712221    |
| Spastic paraplegia 21 (autosomal recessive, Mast syndrome)          | SPG21    | 712815    |
| Spectrin repeat containing, nuclear envelope family member 4        | SYNE4    | 711904    |
| Spectrin, alpha, non-erythrocytic 1                                 | SPTAN1   | 722610    |
| Spectrin, beta, non-erythrocytic 1                                  | SPTBN1   | 716794    |
| Spen family transcriptional repressor                               | SPEN     | 696205    |
| Sperm antigen with calponin homology and coiled-coil domains 1-like | SPECC1L  | 707641    |
| Sperm associated antigen 1                                          | SPAG1    | 705012    |
| Sperm associated antigen 9                                          | SPAG9    | 707613    |
| Spermatid perinuclear RNA binding protein                           | STRBP    | 695402    |
| Spermatogenesis associated 19                                       | SPATA19  | 693524    |
| Spermatogenesis associated 20                                       | SPATA20  | 703313    |
| Spermatogenesis associated 25                                       | SPATA25  | 709097    |
| Spermatogenesis associated 4                                        | SPATA4   | 641336    |
| Spermatogenesis associated 5-like 1                                 | SPATA5L1 | 713376    |
| Spermatogenesis associated 6                                        | SPATA6   | 710827    |
| Spermatogenesis associated 7                                        | SPATA7   | 693836    |
| Spermatogenesis associated 9                                        | SPATA9   | 698748    |
| Spermatogenesis associated, serine rich 2 like                      | SPATS2L  | 699458    |
| Spermidine synthase                                                 | SRM      | 714028    |
| Spermidine/spermine N1-acetyltransferase 1                          | SAT1     | 697884    |
| Spermidine/spermine N1-acetyltransferase family member 2            | SAT2     | 716044    |
| S-phase kinase-associated protein 1                                 | SKP1     | 100423634 |
| Sphingomyelin phosphodiesterase 1                                   | SMPD1    | 711248    |
| Sphingomyelin phosphodiesterase 2                                   | SMPD2    | 698865    |
| Sphingosine-1-phosphate receptor 4                                  | S1PR4    | 712637    |
| Spindle and kinetochore associated complex subunit 2                | SKA2     | 711092    |
| Splicing factor 3b subunit 3                                        | SF3B3    | 708939    |

|                                                                                                               |            |        |
|---------------------------------------------------------------------------------------------------------------|------------|--------|
| Splicing factor 3b subunit 6                                                                                  | SF3B6      | 704090 |
| Splicing factor 3b, subunit 1, 155kda                                                                         | SF3B1      | 697773 |
| Splicing factor 3b, subunit 4, 49kda                                                                          | SF3B4      | 705655 |
| Split hand/foot malformation (ectrodactyly) type 1                                                            | SHFM1      | 698349 |
| Sprouty RTK signaling antagonist 1                                                                            | SPRY1      | 708752 |
| SPT16 homolog, facilitates chromatin remodeling subunit                                                       | SUPT16H    | 708066 |
| SPT4 homolog, DSIF elongation factor subunit                                                                  | SUPT4H1    | 710214 |
| SPT5 homolog, DSIF elongation factor subunit                                                                  | SUPT5H     | 697337 |
| Squamous cell carcinoma antigen recognized by T-cells 3                                                       | SART3      | 705552 |
| Src-related kinase lacking C-terminal regulatory tyrosine and N-terminal myristylation sites                  | SRMS       | 719587 |
| SRSF protein kinase 1                                                                                         | SRPK1      | 719039 |
| SRSF protein kinase 2                                                                                         | SRPK2      | 697351 |
| SRY-box 13                                                                                                    | SOX13      | 700802 |
| SRY-box 17                                                                                                    | SOX17      | 694097 |
| SSU72 homolog, RNA polymerase II CTD phosphatase                                                              | SSU72      | 702348 |
| ST3 beta-galactoside alpha-2,3-sialyltransferase 4                                                            | ST3GAL4    | 717792 |
| ST3 beta-galactoside alpha-2,3-sialyltransferase 5                                                            | ST3GAL5    | 696842 |
| ST6 (alpha-N-acetyl-neuraminyl-2,3-beta-galactosyl-1,3)-N-acetylgalactosaminide alpha-2,6-sialyltransferase 2 | ST6GALNAC2 | 707237 |
| STAM binding protein                                                                                          | STAMPB     | 714562 |
| Stannin                                                                                                       | SNN        | 711909 |
| Staphylococcal nuclease and tudor domain containing 1                                                         | SND1       | 699542 |
| Star related lipid transfer domain containing 13                                                              | STARD13    | 714104 |
| Star related lipid transfer domain containing 3                                                               | STARD3     | 697212 |
| Star related lipid transfer domain containing 5                                                               | STARD5     | 713308 |
| STARD3 N-terminal like                                                                                        | STARD3NL   | 705212 |
| Staufen double-stranded RNA binding protein 1                                                                 | STAU1      | 704197 |
| STE20-related kinase adaptor alpha                                                                            | STRADA     | 717927 |
| STE20-related kinase adaptor beta                                                                             | STRADB     | 641449 |
| Sterile alpha motif domain containing 4A                                                                      | SAMD4A     | 695336 |
| Steroid receptor RNA activator 1                                                                              | SRA1       | 698169 |
| Sterol regulatory element binding transcription factor 1                                                      | SREBF1     | 706972 |
| STIP1 homology and U-box containing protein 1, E3 ubiquitin protein ligase                                    | STUB1      | 697105 |
| Stomatin like 2                                                                                               | STOML2     | 698458 |
| Storkhead box 2                                                                                               | STOX2      | 693692 |
| Strawberry notch homolog 2 (Drosophila)                                                                       | SBNO2      | 721186 |
| Stress induced phosphoprotein 1                                                                               | STIP1      | 717926 |
| Striatin                                                                                                      | STRN       | 708491 |
| Striatin interacting protein 1                                                                                | STRIP1     | 700799 |
| Stromal cell-derived factor 2                                                                                 | SDF2       | 716189 |
| Stromal interaction molecule 1                                                                                | STIM1      | 717963 |
| Structural maintenance of chromosomes 4                                                                       | SMC4       | 702615 |
| Structure specific recognition protein 1                                                                      | SSRP1      | 706614 |
| STT3A, subunit of the oligosaccharyltransferase complex (catalytic)                                           | STT3A      | 717056 |
| SUB1 homolog, transcriptional regulator                                                                       | SUB1       | 701045 |
| Succinate dehydrogenase complex assembly factor 2                                                             | SDHAF2     | 693401 |

|                                                                                                   |         |           |
|---------------------------------------------------------------------------------------------------|---------|-----------|
| Succinate dehydrogenase complex subunit A, flavoprotein (Fp)                                      | SDHA    | 708018    |
| Succinate dehydrogenase complex subunit B, iron sulfur (Ip)                                       | SDHB    | 699810    |
| Succinate dehydrogenase complex, subunit D, integral membrane protein                             | SDHD    | 711326    |
| Succinate-coa ligase, GDP-forming, beta subunit                                                   | SUCLG2  | 697454    |
| Sulfide quinone reductase-like (yeast)                                                            | SQRDL   | 713699    |
| Sulfiredoxin 1                                                                                    | SRXN1   | 714997    |
| SUMO1/sentrin specific peptidase 5                                                                | SENP5   | 710223    |
| SUN domain containing ossification factor                                                         | SUCO    | 705776    |
| Superkiller viralicidic activity 2-like 2 (S. Cerevisiae)                                         | SKIV2L2 | 706419    |
| Superoxide dismutase 1, soluble                                                                   | SOD1    | 574096    |
| Supervillin                                                                                       | SVIL    | 695267    |
| Suppression of tumorigenicity 13 (colon carcinoma) (Hsp70 interacting protein)                    | ST13    | 705664    |
| Suppression of tumorigenicity 13 (colon carcinoma) (Hsp70 interacting protein)                    | ST13    | 705664    |
| Suppression of tumorigenicity 14                                                                  | ST14    | 718848    |
| Suppression of tumorigenicity 7 like                                                              | ST7L    | 705541    |
| Suppressor of cytokine signaling 7                                                                | SOCS7   | 693737    |
| Suppressor of fused homolog (Drosophila)                                                          | SUFU    | 713576    |
| SURP and G-patch domain containing 1                                                              | SUGP1   | 719772    |
| SURP and G-patch domain containing 2                                                              | SUGP2   | 719666    |
| Survival motor neuron domain containing 1                                                         | SMNDC1  | 694761    |
| Survival of motor neuron 1, telomeric                                                             | SMN1    | 677703    |
| Sushi domain containing 6                                                                         | SUSD6   | 712719    |
| SWAP switching B-cell complex 70kda subunit                                                       | SWAP70  | 703651    |
| SWAP switching B-cell complex 70kda subunit                                                       | SWAP70  | 703651    |
| SWI/SNF related, matrix associated, actin dependent regulator of chromatin, subfamily a, member 2 | SMARCA2 | 696973    |
| SWI/SNF related, matrix associated, actin dependent regulator of chromatin, subfamily a, member 5 | SMARCA5 | 700614    |
| SWI/SNF related, matrix associated, actin dependent regulator of chromatin, subfamily a-like 1    | SMARCA1 | 695741    |
| SWI/SNF related, matrix associated, actin dependent regulator of chromatin, subfamily b, member 1 | SMARCB1 | 699190    |
| SWI/SNF related, matrix associated, actin dependent regulator of chromatin, subfamily d, member 2 | SMARCD2 | 717461    |
| SWI/SNF related, matrix associated, actin dependent regulator of chromatin, subfamily e, member 1 | SMARCE1 | 701310    |
| SWT1, RNA endoribonuclease homolog                                                                | SWT1    | 714083    |
| SYF2 pre-mrna-splicing factor                                                                     | SYF2    | 719564    |
| Synapsin III                                                                                      | SYN3    | 100430213 |
| Synaptophysin-like 1                                                                              | SYPL1   | 698350    |
| Synaptosome associated protein 25kda                                                              | SNAP25  | 574204    |
| Synaptotagmin 6                                                                                   | SYT6    | 708175    |
| Synaptotagmin binding, cytoplasmic RNA interacting protein                                        | SYNCRIP | 696756    |
| Synaptotagmin like 1                                                                              | SYTL1   | 715833    |
| Synaptotagmin like 2                                                                              | SYTL2   | 703187    |

|                                                                                             |          |        |
|---------------------------------------------------------------------------------------------|----------|--------|
| Synaptotagmin like 4                                                                        | SYTL4    | 700889 |
| Syndecan 1                                                                                  | SDC1     | 701544 |
| Syndecan 2                                                                                  | SDC2     | 703841 |
| Syndecan 4                                                                                  | SDC4     | 710914 |
| Syndecan binding protein                                                                    | SDCBP    | 698381 |
| Synergisin, gamma                                                                           | SYNRG    | 717750 |
| Synovial sarcoma translocation gene on chromosome 18-like 2                                 | SS18L2   | 716387 |
| Syntaxin 12                                                                                 | STX12    | 716455 |
| Syntrophin, beta 2 (dystrophin-associated protein A1, 59kda, basic component 2)             | SNTB2    | 704333 |
| Syntrophin, gamma 1                                                                         | SNTG1    | 709244 |
| Tafazzin                                                                                    | TAZ      | 574297 |
| TAM41, mitochondrial translocator assembly and maintenance protein, homolog (S. Cerevisiae) | C3orf31  | 695998 |
| TANK-binding kinase 1                                                                       | TBK1     | 717427 |
| Tankyrase 1 binding protein 1                                                               | TNKS1BP1 | 704825 |
| Tankyrase, TRF1-interacting ankyrin-related ADP-ribose polymerase 2                         | TNKS2    | 698050 |
| TAO kinase 2                                                                                | TAOK2    | 707777 |
| TAP binding protein-like                                                                    | TAPBPL   | 712626 |
| TAR (HIV-1) RNA binding protein 1                                                           | TARBP1   | 712397 |
| TAR (HIV-1) RNA binding protein 2                                                           | TARBP2   | 703294 |
| Target of myb1 membrane trafficking protein                                                 | TOM1     | 717499 |
| TATA-box binding protein associated factor 12                                               | TAF12    | 717135 |
| TATA-box binding protein associated factor 2                                                | TAF2     | 702411 |
| TATA-box binding protein associated factor 5                                                | TAF5     | 714558 |
| TATA-box binding protein associated factor 5 like                                           | TAF5L    | 693770 |
| TATA-box binding protein associated factor 7                                                | TAF7     | 574347 |
| TATA-box binding protein associated factor 9                                                | TAF9     | 700239 |
| TATA-box binding protein associated factor, RNA polymerase I, D                             | TAF1D    | 696602 |
| Tatd dnase domain containing 1                                                              | TATDN1   | 706095 |
| Tax1 (human T-cell leukemia virus type I) binding protein 1                                 | TAX1BP1  | 698103 |
| Tax1 (human T-cell leukemia virus type I) binding protein 3                                 | TAX1BP3  | 706829 |
| TBC1 domain family member 10C                                                               | TBC1D10C | 712270 |
| TBC1 domain family member 25                                                                | TBC1D25  | 710596 |
| TBC1 domain family member 4                                                                 | TBC1D4   | 696915 |
| TBC1 domain family member 9                                                                 | TBC1D9   | 702230 |
| TBK1 binding protein 1                                                                      | TBKBP1   | 693913 |
| T-box 21                                                                                    | TBX21    | 694044 |
| TCDD-inducible poly(ADP-ribose) polymerase                                                  | TIPARP   | 706180 |
| T-cell activation rhoGTPase activating protein                                              | TAGAP    | 701690 |
| T-cell leukemia/lymphoma 1B                                                                 | TCL1B    | 703241 |
| TCF3 (E2A) fusion partner (in childhood Leukemia)                                           | TFPT     | 720296 |
| Teashirt zinc finger homeobox 1                                                             | TSHZ1    | 703018 |
| Tectonic family member 3                                                                    | TCTN3    | 703844 |
| TELO2 interacting protein 1                                                                 | TTI1     | 699930 |
| TELO2 interacting protein 2                                                                 | TTI2     | 696776 |
| Telomeric repeat binding factor 2, interacting protein                                      | TERF2IP  | 712149 |

|                                                                       |         |        |
|-----------------------------------------------------------------------|---------|--------|
| Teneurin transmembrane protein 1                                      | TENM1   | 699897 |
| TERF1 (TRF1)-interacting nuclear factor 2                             | TINF2   | 715812 |
| Testis expressed 10                                                   | TEX10   | 714536 |
| Testis expressed 26                                                   | TEX26   | 713363 |
| Testis expressed 264                                                  | TEX264  | 700350 |
| Testis expressed 30                                                   | TEX30   | 701917 |
| Testis-specific kinase 1                                              | TESK1   | 697206 |
| Testis-specific kinase 2                                              | TESK2   | 705907 |
| Tetraspanin 1                                                         | TSPAN1  | 707431 |
| Tetraspanin 15                                                        | TSPAN15 | 711675 |
| Tetraspanin 18                                                        | TSPAN18 | 715506 |
| Tetraspanin 3                                                         | TSPAN3  | 708428 |
| Tetraspanin 32                                                        | TSPAN32 | 704862 |
| Tetratricopeptide repeat domain 1                                     | TTC1    | 695225 |
| Tetratricopeptide repeat domain 13                                    | TTC13   | 714027 |
| Tetratricopeptide repeat domain 14                                    | TTC14   | 710895 |
| Tetratricopeptide repeat domain 16                                    | TTC16   | 706784 |
| Tetratricopeptide repeat domain 21A                                   | TTC21A  | 694904 |
| Tetratricopeptide repeat domain 23                                    | TTC23   | 708530 |
| Tetratricopeptide repeat domain 32                                    | TTC32   | 700947 |
| Tetratricopeptide repeat domain 7B                                    | TTC7B   | 696029 |
| Tetratricopeptide repeat, ankyrin repeat and coiled-coil containing 1 | TANC1   | 699196 |
| TGF-beta activated kinase 1/MAP3K7 binding protein 1                  | TAB1    | 703409 |
| TGF-beta activated kinase 1/MAP3K7 binding protein 2                  | TAB2    | 696875 |
| THAP domain containing 11                                             | THAP11  | 700354 |
| THAP domain containing 7                                              | THAP7   | 696208 |
| Thioredoxin                                                           | TXN     | 712587 |
| Thioredoxin domain containing 12 (endoplasmic reticulum)              | TXNDC12 | 712891 |
| Thioredoxin domain containing 9                                       | TXNDC9  | 709303 |
| Thioredoxin like 1                                                    | TXNL1   | 695194 |
| Thioredoxin like 4A                                                   | TXNL4A  | 698969 |
| Thioredoxin reductase 1                                               | TXNRD1  | 701062 |
| Thioredoxin-related transmembrane protein 1                           | TMX1    | 707057 |
| Thiosulfate sulfurtransferase (rhodanese)                             | TST     | 698021 |
| THO complex 1                                                         | THOC1   | 697954 |
| THO complex 3                                                         | THOC3   | 695561 |
| THO complex 6                                                         | THOC6   | 700217 |
| THUMP domain containing 2                                             | THUMPD2 | 712045 |
| Thy-1 cell surface antigen                                            | THY1    | 705321 |
| Thymidine phosphorylase                                               | TYMP    | 716161 |
| Thymocyte nuclear protein 1                                           | THYN1   | 700413 |
| Thymosin beta 4, X-linked                                             | TMSB4X  | 710959 |
| Thyroid hormone receptor associated protein 3                         | THRAP3  | 713033 |
| Thyroid hormone receptor interactor 11                                | TRIP11  | 697489 |
| Thyroid hormone receptor interactor 12                                | TRIP12  | 710560 |
| Thyroid hormone receptor interactor 4                                 | TRIP4   | 707263 |
| TIMELESS interacting protein                                          | TIPIN   | 710328 |
| TLC domain containing 1                                               | TLCD1   | 710391 |



|                                                                            |          |        |
|----------------------------------------------------------------------------|----------|--------|
| TM2 domain containing 2                                                    | TM2D2    | 701007 |
| TNF receptor associated factor 6                                           | TRAF6    | 716907 |
| TNF receptor associated factor 7                                           | TRAF7    | 695415 |
| TNF receptor-associated protein 1                                          | TRAP1    | 706234 |
| Topoisomerase (DNA) I                                                      | TOP1     | 697300 |
| Topoisomerase (DNA) II beta                                                | TOP2B    | 677709 |
| Topoisomerase (DNA) II binding protein 1                                   | TOPBP1   | 719054 |
| Topoisomerase (DNA) III beta                                               | TOP3B    | 698317 |
| Torsin family 1, member A (torsin A)                                       | TOR1A    | 722520 |
| Torsin family 2, member A                                                  | TOR2A    | 700203 |
| Torsin family 3, member A                                                  | TOR3A    | 717100 |
| Trace amine associated receptor 6                                          | TAAR6    | 709418 |
| TRAF family member associated NFkB activator                               | TANK     | 700942 |
| TRAF3 interacting protein 2                                                | TRAF3IP2 | 697530 |
| TRAF3 interacting protein 3                                                | TRAF3IP3 | 712895 |
| Trafficking protein particle complex 11                                    | TRAPPC11 | 702066 |
| Trafficking protein particle complex 4                                     | TRAPPC4  | 702469 |
| Trafficking protein, kinesin binding 2                                     | TRAK2    | 701779 |
| TRAF-type zinc finger domain containing 1                                  | TRAFD1   | 711635 |
| Trans-2,3-enoyl-coa reductase                                              | TECR     | 718928 |
| Transcription elongation factor A (SII), 2                                 | TCEA2    | 694026 |
| Transcription elongation factor A (SII)-like 1                             | TCEAL1   | 696826 |
| Transcription elongation factor A (SII)-like 3                             | TCEAL3   | 696692 |
| Transcription elongation factor A (SII)-like 4                             | TCEAL4   | 696453 |
| Transcription elongation factor A (SII)-like 7                             | TCEAL7   | 695831 |
| Transcription elongation factor A (SII)-like 8                             | TCEAL8   | 695496 |
| Transcription elongation factor B (SIII), polypeptide 1 (15kda, elongin C) | TCEB1    | 698922 |
| Transcription elongation regulator 1                                       | TCERG1   | 707912 |
| Transcription factor 15 (basic helix-loop-helix)                           | TCF15    | 716916 |
| Transcription factor 4                                                     | TCF4     | 695814 |
| Transcription factor 7-like 1 (T-cell specific, HMG-box)                   | TCF7L1   | 694560 |
| Transcription factor A, mitochondrial                                      | TFAM     | 701368 |
| Transcription factor B1, mitochondrial                                     | TFB1M    | 701830 |
| Transcription factor binding to IGHM enhancer 3                            | TFE3     | 712161 |
| Transcription factor CP2                                                   | TFCP2    | 574399 |
| Transcription factor Dp family member 3                                    | TFDP3    | 706557 |
| Transcription factor EC                                                    | TFEC     | 704124 |
| Transcriptional adaptor 3                                                  | TADA3    | 700090 |
| Transducer of ERBB2, 1                                                     | TOB1     | 706873 |
| Transducin (beta)-like 1 X-linked receptor 1                               | TBL1XR1  | 712740 |
| Transducin (beta)-like 2                                                   | TBL2     | 716515 |
| Transducin like enhancer of split 3                                        | TLE3     | 698046 |
| Transformer 2 alpha homolog (Drosophila)                                   | TRA2A    | 574247 |
| Transformer 2 beta homolog (Drosophila)                                    | TRA2B    | 574337 |
| Transforming growth factor beta 1 induced transcript 1                     | TGFB1I1  | 714172 |
| Transforming growth factor beta 2                                          | TGFB2    | 707540 |
| Transforming growth factor beta regulator 4                                | TBRG4    | 697717 |

|                                                                           |          |           |
|---------------------------------------------------------------------------|----------|-----------|
| Transforming, acidic coiled-coil containing protein 3                     | TACC3    | 712898    |
| Transient receptor potential cation channel, subfamily C, member 7        | TRPC7    | 712863    |
| Transient receptor potential cation channel, subfamily V, member 4        | TRPV4    | 709605    |
| Transketolase-like 1                                                      | TKTL1    | 699278    |
| Translation machinery associated 7 homolog                                | TMA7     | 710220    |
| Translational activator of mitochondrially encoded cytochrome c oxidase I | TACO1    | 717828    |
| Translin-associated factor X interacting protein 1                        | TSNAXIP1 | 700095    |
| Translocase of inner mitochondrial membrane 17 homolog A (yeast)          | TIMM17A  | 707001    |
| Translocase of inner mitochondrial membrane 17 homolog B (yeast)          | TIMM17B  | 714895    |
| Translocase of inner mitochondrial membrane 21 homolog (yeast)            | TIMM21   | 694581    |
| Translocase of inner mitochondrial membrane 23 homolog (yeast)            | TIMM23   | 709594    |
| Translocase of inner mitochondrial membrane 44 homolog (yeast)            | TIMM44   | 709800    |
| Translocase of inner mitochondrial membrane 8 homolog B (yeast)           | TIMM8B   | 711249    |
| Translocase of outer mitochondrial membrane 22 homolog (yeast)            | TOMM22   | 701286    |
| Translocase of outer mitochondrial membrane 70 homolog A (S. Cerevisiae)  | TOMM70A  | 700347    |
| Translocated promoter region, nuclear basket protein                      | TPR      | 713910    |
| Transmembrane 4 L six family member 1                                     | TM4SF1   | 711908    |
| Transmembrane 4 L six family member 5                                     | TM4SF5   | 709844    |
| Transmembrane 9 superfamily member 1                                      | TM9SF1   | 715472    |
| Transmembrane 9 superfamily protein member 4                              | TM9SF4   | 712260    |
| Transmembrane and coiled-coil domain family 1                             | TMCC1    | 702576    |
| Transmembrane and coiled-coil domains 4                                   | TMCO4    | 703851    |
| Transmembrane BAX inhibitor motif containing 6                            | TMBIM6   | 677702    |
| Transmembrane p24 trafficking protein 1                                   | TMED1    | 713618    |
| Transmembrane p24 trafficking protein 3                                   | TMED3    | 711993    |
| Transmembrane p24 trafficking protein 7                                   | TMED7    | 100533189 |
| Transmembrane phosphoinositide 3-phosphatase and tensin homolog 2         | TPTE2    | 704870    |
| Transmembrane protease, serine 13                                         | TMPRSS13 | 698586    |
| Transmembrane protein 104                                                 | TMEM104  | 698592    |
| Transmembrane protein 106C                                                | TMEM106C | 704741    |
| Transmembrane protein 11                                                  | TMEM11   | 704970    |
| Transmembrane protein 115                                                 | TMEM115  | 702164    |
| Transmembrane protein 121                                                 | TMEM121  | 700005    |
| Transmembrane protein 123                                                 | TMEM123  | 702833    |
| Transmembrane protein 126A                                                | TMEM126A | 702831    |
| Transmembrane protein 126B                                                | TMEM126B | 702719    |
| Transmembrane protein 135                                                 | TMEM135  | 704963    |
| Transmembrane protein 138                                                 | TMEM138  | 693905    |
| Transmembrane protein 145                                                 | TMEM145  | 709268    |
| Transmembrane protein 14C                                                 | TMEM14C  | 697976    |
| Transmembrane protein 150A                                                | TMEM150A | 696101    |
| Transmembrane protein 160                                                 | TMEM160  | 716996    |
| Transmembrane protein 163                                                 | TMEM163  | 709015    |
| Transmembrane protein 165                                                 | TMEM165  | 696262    |
| Transmembrane protein 167A                                                | TMEM167A | 712218    |

|                                                                           |          |           |
|---------------------------------------------------------------------------|----------|-----------|
| Transmembrane protein 168                                                 | TMEM168  | 702972    |
| Transmembrane protein 179B                                                | TMEM179B | 718518    |
| Transmembrane protein 183A                                                | TMEM183A | 704195    |
| Transmembrane protein 185A                                                | TMEM185A | 705538    |
| Transmembrane protein 199                                                 | TMEM199  | 708298    |
| Transmembrane protein 203                                                 | TMEM203  | 706164    |
| Transmembrane protein 204                                                 | TMEM204  | 701926    |
| Transmembrane protein 205                                                 | TMEM205  | 714330    |
| Transmembrane protein 208                                                 | TMEM208  | 697228    |
| Transmembrane protein 216                                                 | TMEM216  | 693655    |
| Transmembrane protein 218                                                 | TMEM218  | 100430362 |
| Transmembrane protein 248                                                 | TMEM248  | 695654    |
| Transmembrane protein 25                                                  | TMEM25   | 700466    |
| Transmembrane protein 254                                                 | TMEM254  | 701130    |
| Transmembrane protein 261                                                 | TMEM261  | 716818    |
| Transmembrane protein 261                                                 | TMEM261  | 716818    |
| Transmembrane protein 30A                                                 | TMEM30A  | 717907    |
| Transmembrane protein 31                                                  | TMEM31   | 100429773 |
| Transmembrane protein 39A                                                 | TMEM39A  | 712208    |
| Transmembrane protein 39B                                                 | TMEM39B  | 706700    |
| Transmembrane protein 42                                                  | TMEM42   | 714654    |
| Transmembrane protein 44                                                  | TMEM44   | 708003    |
| Transmembrane protein 45A                                                 | TMEM45A  | 700594    |
| Transmembrane protein 5                                                   | TMEM5    | 717102    |
| Transmembrane protein 50A                                                 | TMEM50A  | 100424313 |
| Transmembrane protein 55A                                                 | TMEM55A  | 696779    |
| Transmembrane protein 55B                                                 | TMEM55B  | 100428001 |
| Transmembrane protein 57                                                  | TMEM57   | 654415    |
| Transmembrane protein 60                                                  | TMEM60   | 693679    |
| Transmembrane protein 62                                                  | TMEM62   | 709505    |
| Transmembrane protein 94                                                  | TMEM94   | 702374    |
| Transmembrane protein with EGF-like and two<br>follistatin-like domains 1 | TMEFF1   | 714325    |
| Transmembrane protein, adipocyte associated 1                             | TPRA1    | 707221    |
| Transporter 1, ATP-binding cassette, sub-family B (MDR/TAP)               | TAP1     | 717726    |
| Transportin 2                                                             | TNPO2    | 717710    |
| Tribbles pseudokinase 3                                                   | TRIB3    | 714636    |
| Trinucleotide repeat containing 6A                                        | TNRC6A   | 701680    |
| Triokinase/FMN cyclase                                                    | TKFC     | 694117    |
| Tripartite motif containing 11                                            | TRIM11   | 694150    |
| Tripartite motif containing 24                                            | TRIM24   | 710229    |
| Tripartite motif containing 27                                            | TRIM27   | 706129    |
| Tripartite motif containing 32                                            | TRIM32   | 702595    |
| Tripartite motif containing 33                                            | TRIM33   | 710600    |
| Tripartite motif containing 37                                            | TRIM37   | 710934    |
| Tripartite motif containing 41                                            | TRIM41   | 708426    |
| Tripartite motif containing 46                                            | TRIM46   | 717498    |
| Tripartite motif containing 6                                             | TRIM6    | 100428125 |

|                                                            |           |           |
|------------------------------------------------------------|-----------|-----------|
| Tripartite motif containing 62                             | TRIM62    | 709927    |
| Tripartite motif containing 8                              | TRIM8     | 713701    |
| Tripartite motif family like 1                             | TRIML1    | 698114    |
| TRK-fused gene                                             | TFG       | 700972    |
| Trna 5-methylaminomethyl-2-thiouridylate methyltransferase | TRMU      | 714268    |
| Trna isopentenyltransferase 1                              | TRIT1     | 716422    |
| Trna methyltransferase 1                                   | TRMT1     | 718227    |
| Trna methyltransferase 11 homolog                          | TRMT11    | 712712    |
| Trna methyltransferase 6                                   | TRMT6     | 718229    |
| Trna methyltransferase 61B                                 | TRMT61B   | 703419    |
| Trna methyltransferase O                                   | TRMO      | 715609    |
| Trna splicing endonuclease subunit 15                      | TSEN15    | 717481    |
| Trophoblast glycoprotein                                   | TPBG      | 693944    |
| Tropomodulin 3                                             | TMOD3     | 694478    |
| Tropomodulin 4                                             | TMOD4     | 709732    |
| Tropomyosin 1 (alpha)                                      | TPM1      | 705236    |
| Tropomyosin 2 (beta)                                       | TPM2      | 696604    |
| Tropomyosin 3                                              | TPM3      | 716336    |
| Troponin T type 2 (cardiac)                                | TNNT2     | 709882    |
| Trub pseudouridine (psi) synthase family member 2          | TRUB2     | 717619    |
| Tryptase gamma 1                                           | TPSG1     | 100425751 |
| TSC22 domain family member 1                               | TSC22D1   | 701076    |
| TSC22 domain family member 3                               | TSC22D3   | 702656    |
| TSC22 domain family member 4                               | TSC22D4   | 719183    |
| TSPY-like 4                                                | TSPYL4    | 716137    |
| TSSK6 activating co-chaperone                              | TSACC     | 719490    |
| Tu translation elongation factor, mitochondrial            | TUFM      | 705462    |
| Tubulin alpha 1a                                           | TUBA1A    | 574194    |
| Tubulin alpha 3c                                           | TUBA3C    | 707215    |
| Tubulin alpha 4a                                           | TUBA4A    | 702583    |
| Tubulin beta class I                                       | TUBB      | 574113    |
| Tubulin folding cofactor E                                 | TBCE      | 711476    |
| Tubulin gamma 1                                            | TUBG1     | 710756    |
| Tubulin, alpha 1b                                          | TUBA1B    | 709643    |
| Tudor domain containing 3                                  | TDRD3     | 696228    |
| Tuftelin interacting protein 11                            | TFIP11    | 712691    |
| Tumor necrosis factor (ligand) superfamily, member 12      | TNFSF12   | 100551506 |
| Tumor necrosis factor receptor superfamily member 13C      | TNFRSF13C | 712577    |
| Tumor necrosis factor receptor superfamily member 25       | TNFRSF25  | 703744    |
| Tumor necrosis factor receptor superfamily, member 14      | TNFRSF14  | 695042    |
| Tumor necrosis factor superfamily member 13                | TNFSF13   | 100551507 |
| Tumor necrosis factor superfamily member 13b               | TNFSF13B  | 693917    |
| Tumor protein D52-like 1                                   | TPD52L1   | 716568    |
| Tumor protein p53                                          | TP53      | 716170    |
| Tumor protein p53 binding protein 1                        | TP53BP1   | 710237    |
| Tumor protein p53 binding protein 2                        | TP53BP2   | 705383    |
| Tumor protein p53 inducible nuclear protein 2              | TP53INP2  | 707113    |
| Tumor protein, translationally-controlled 1                | TPT1      | 702155    |

|                                                                               |         |           |
|-------------------------------------------------------------------------------|---------|-----------|
| Tumor suppressor candidate 1                                                  | TUSC1   | 708101    |
| Twist family bhlh transcription factor 2                                      | TWIST2  | 697078    |
| TWIST neighbor                                                                | TWISTNB | 707781    |
| Twisted gastrulation homolog 1 (Drosophila)                                   | TWSG1   | 705804    |
| Tyrosinase-related protein 1                                                  | TYRP1   | 714646    |
| Tyrosine 3-monooxygenase/tryptophan 5-monooxygenase activation protein, beta  | YWHAB   | 717788    |
| Tyrosine 3-monooxygenase/tryptophan 5-monooxygenase activation protein, eta   | YWHAH   | 717016    |
| Tyrosine 3-monooxygenase/tryptophan 5-monooxygenase activation protein, gamma | YWHAG   | 715517    |
| Tyrosine kinase, non-receptor, 1                                              | TNK1    | 715180    |
| Tyrosine kinase, non-receptor, 2                                              | TNK2    | 711655    |
| Tyrosyl-DNA phosphodiesterase 2                                               | TDP2    | 715162    |
| Tyrosyl-trna synthetase                                                       | YARS    | 709003    |
| U2 small nuclear RNA auxiliary factor 1                                       | U2AF1   | 722383    |
| UBA domain containing 2                                                       | UBAC2   | 703484    |
| Ubiquilin 1                                                                   | UBQLN1  | 713525    |
| Ubiquinol-cytochrome c reductase core protein II                              | UQCRC2  | 697967    |
| Ubiquinol-cytochrome c reductase, 6.4kda subunit                              | UQCR    | 708396    |
| Ubiquinol-cytochrome c reductase, complex III subunit VII, 9.5kda             | UQCRQ   | 708950    |
| Ubiquitin A-52 residue ribosomal protein fusion product 1                     | UBA52   | 720243    |
| Ubiquitin B                                                                   | UBB     | 696110    |
| Ubiquitin conjugating enzyme E2 variant 1                                     | UBE2V1  | 100425552 |
| Ubiquitin conjugating enzyme E2A                                              | UBE2A   | 693716    |
| Ubiquitin conjugating enzyme E2D 3                                            | UBE2D3  | 710772    |
| Ubiquitin conjugating enzyme E2D 4 (putative)                                 | UBE2D4  | 707831    |
| Ubiquitin conjugating enzyme E2E 3                                            | UBE2E3  | 704530    |
| Ubiquitin conjugating enzyme E2F (putative)                                   | UBE2F   | 695394    |
| Ubiquitin conjugating enzyme E2H                                              | UBE2H   | 702056    |
| Ubiquitin conjugating enzyme E2I                                              | UBE2I   | 722434    |
| Ubiquitin conjugating enzyme E2L 3                                            | UBE2L3  | 697675    |
| Ubiquitin conjugating enzyme E2O                                              | UBE2O   | 710529    |
| Ubiquitin C-terminal hydrolase L3                                             | UCHL3   | 697276    |
| Ubiquitin domain containing 2                                                 | UBTD2   | 709455    |
| Ubiquitin fusion degradation 1 like (yeast)                                   | UFD1L   | 711716    |
| Ubiquitin like 4B                                                             | UBL4B   | 701055    |
| Ubiquitin like 5                                                              | UBL5    | 711015    |
| Ubiquitin like 7                                                              | UBL7    | 702305    |
| Ubiquitin protein ligase E3 component n-recogin 7 (putative)                  | UBR7    | 698882    |
| Ubiquitin protein ligase E3B                                                  | UBE3B   | 707324    |
| Ubiquitin protein ligase E3D                                                  | UBE3D   | 694910    |
| Ubiquitin related modifier 1                                                  | URM1    | 722618    |
| Ubiquitin specific peptidase 10                                               | USP10   | 718471    |
| Ubiquitin specific peptidase 10                                               | USP10   | 718471    |
| Ubiquitin specific peptidase 11                                               | USP11   | 706555    |
| Ubiquitin specific peptidase 14 (trna-guanine transglycosylase)               | USP14   | 698087    |

|                                                                    |           |           |
|--------------------------------------------------------------------|-----------|-----------|
| Ubiquitin specific peptidase 15                                    | USP15     | 716793    |
| Ubiquitin specific peptidase 16                                    | USP16     | 706403    |
| Ubiquitin specific peptidase 20                                    | USP20     | 716505    |
| Ubiquitin specific peptidase 21                                    | USP21     | 719894    |
| Ubiquitin specific peptidase 26                                    | USP26     | 706435    |
| Ubiquitin specific peptidase 38                                    | USP38     | 700235    |
| Ubiquitin specific peptidase 39                                    | USP39     | 696217    |
| Ubiquitin specific peptidase 47                                    | USP47     | 701660    |
| Ubiquitin specific peptidase 48                                    | USP48     | 707110    |
| Ubiquitin specific peptidase 7 (herpes virus-associated)           | USP7      | 714625    |
| Ubiquitin specific peptidase 8                                     | USP8      | 715523    |
| Ubiquitin specific peptidase 9, Y-linked                           | USP9Y     | 100270703 |
| Ubiquitination factor E4B                                          | UBE4B     | 713348    |
| Ubiquitin-conjugating enzyme E2E 2                                 | UBE2E2    | 699101    |
| Ubiquitin-like modifier activating enzyme 1                        | UBA1      | 706324    |
| Ubiquitin-like modifier activating enzyme 2                        | UBA2      | 705808    |
| Ubiquitin-like modifier activating enzyme 3                        | UBA3      | 696493    |
| U-box domain containing 5                                          | UBOX5     | 717166    |
| UBX domain protein 1                                               | UBXN1     | 718643    |
| UBX domain protein 10                                              | UBXN10    | 705058    |
| UBX domain protein 11                                              | UBXN11    | 719826    |
| UBX domain protein 6                                               | UBXN6     | 715070    |
| UDP-Gal:betaglcnaac beta 1,4- galactosyltransferase, polypeptide 1 | B4GALT1   | 703541    |
| UDP-glcnaac:betagal beta-1,3-N-acetylglucosaminyltransferase 2     | B3GNT2    | 693396    |
| UDP-N-acetylglucosamine pyrophosphorylase 1                        | UAP1      | 720116    |
| UHRF1 binding protein 1-like                                       | UHRF1BP1L | 694816    |
| Unconventional SNARE in the ER 1 homolog (S. Cerevisiae)           | USE1      | 718905    |
| UPF3 regulator of nonsense transcripts homolog B (yeast)           | UPF3B     | 694247    |
| Up-regulated during skeletal muscle growth 5 homolog (mouse)       | USMG5     | 100428450 |
| Upstream binding protein 1 (LBP-1a)                                | UBP1      | 706283    |
| Upstream transcription factor family member 3                      | USF3      | 709660    |
| Uracil DNA glycosylase                                             | UNG       | 706816    |
| Uracil phosphoribosyltransferase homolog                           | UPRT      | 704157    |
| Uridine monophosphate synthetase                                   | UMPS      | 715664    |
| Uridine-cytidine kinase 2                                          | UCK2      | 695725    |
| USP6 N-terminal like                                               | USP6NL    | 694275    |
| UTP14, U3 small nucleolar ribonucleoprotein, homolog C (yeast)     | UTP14C    | 709657    |
| UTP20 small subunit processome component                           | UTP20     | 696472    |
| UTP6 small subunit processome component                            | UTP6      | 713361    |
| UV radiation resistance associated                                 | UVRAG     | 696601    |
| Vaccinia related kinase 1                                          | VRK1      | 704798    |
| Vacuolar protein sorting 36 homolog (S. Cerevisiae)                | VPS36     | 693290    |
| Vacuolar protein sorting 45 homolog (S. Cerevisiae)                | VPS45     | 706035    |
| Vacuolar protein sorting 72 homolog (S. Cerevisiae)                | VPS72     | 709818    |
| V-akt murine thymoma viral oncogene homolog 3                      | AKT3      | 714717    |
| Valosin containing protein lysine (K) methyltransferase            | VCPKMT    | 705487    |
| Valyl-trna synthetase                                              | VARS      | 715537    |
| Vascular endothelial growth factor A                               | VEGFA     | 574209    |

|                                                                                   |          |           |
|-----------------------------------------------------------------------------------|----------|-----------|
| Vasoactive intestinal peptide receptor 1                                          | VIPR1    | 717438    |
| VCP-interacting membrane selenoprotein                                            | VIMP     | 694752    |
| V-crk avian sarcoma virus CT10 oncogene homolog                                   | CRK      | 701185    |
| Versican                                                                          | VCAN     | 712365    |
| Vesicle (multivesicular body) trafficking 1                                       | VTG1     | 701578    |
| Vesicle associated membrane protein 2                                             | VAMP2    | 574134    |
| Vesicle associated membrane protein 3                                             | VAMP3    | 707972    |
| Vesicle associated membrane protein 8                                             | VAMP8    | 695851    |
| Vesicle transport through interaction with t-snares 1B                            | VTG1B    | 711113    |
| Vestigial like family member 4                                                    | VGLL4    | 699034    |
| Vezatin, adherens junctions transmembrane protein                                 | VEZT     | 716675    |
| Villin 1                                                                          | VIL1     | 698946    |
| Villin-like                                                                       | VILL     | 696988    |
| Visual system homeobox 1                                                          | VSX1     | 715973    |
| Vitamin K epoxide reductase complex subunit 1                                     | VKORC1   | 714412    |
| Vitamin K epoxide reductase complex subunit 1 like 1                              | VKORC1L1 | 697591    |
| Vitronectin                                                                       | VTN      | 708499    |
| V-kit Hardy-Zuckerman 4 feline sarcoma viral oncogene homolog                     | KIT      | 696759    |
| Voltage-dependent anion channel 1                                                 | VDAC1    | 710045    |
| Voltage-dependent anion channel 2                                                 | VDAC2    | 704257    |
| Von Willebrand factor                                                             | VWF      | 722019    |
| VPS11, CORVET/HOPS core subunit                                                   | VPS11    | 702834    |
| VPS18, CORVET/HOPS core subunit                                                   | VPS18    | 704795    |
| VPS26 retromer complex component A                                                | VPS26A   | 717371    |
| VPS33B interacting protein, apical-basolateral polarity regulator, spe-39 homolog | VIPAS39  | 706315    |
| VPS39 HOPS complex subunit                                                        | VPS39    | 707791    |
| VPS52 GARP complex subunit                                                        | VPS52    | 100430905 |
| VPS54 GARP complex subunit                                                        | VPS54    | 695397    |
| VPS8, CORVET complex subunit                                                      | VPS8     | 701567    |
| V-ral simian leukemia viral oncogene homolog A (ras related)                      | RALA     | 703440    |
| V-ral simian leukemia viral oncogene homolog B                                    | RALB     | 695852    |
| V-set and immunoglobulin domain containing 4                                      | VSIG4    | 709685    |
| WAP four-disulfide core domain 12                                                 | WFDC12   | 711552    |
| WD repeat containing, antisense to TP53                                           | WRAP53   | 716125    |
| WD repeat domain 11                                                               | WDR11    | 714990    |
| WD repeat domain 12                                                               | WDR12    | 705623    |
| WD repeat domain 18                                                               | WDR18    | 704547    |
| WD repeat domain 19                                                               | WDR19    | 698866    |
| WD repeat domain 20                                                               | WDR20    | 708533    |
| WD repeat domain 26                                                               | WDR26    | 704911    |
| WD repeat domain 3                                                                | WDR3     | 711960    |
| WD repeat domain 37                                                               | WDR37    | 709975    |
| WD repeat domain 4                                                                | WDR4     | 714230    |
| WD repeat domain 44                                                               | WDR44    | 710598    |
| WD repeat domain 47                                                               | WDR47    | 696942    |
| WD repeat domain 59                                                               | WDR59    | 710576    |
| WD repeat domain 6                                                                | WDR6     | 708505    |

|                                                                        |         |        |
|------------------------------------------------------------------------|---------|--------|
| WD repeat domain 61                                                    | WDR61   | 709971 |
| WD repeat domain 74                                                    | WDR74   | 718460 |
| WD repeat domain 75                                                    | WDR75   | 709104 |
| Werner helicase interacting protein 1                                  | WRNIP1  | 707250 |
| Wilms tumor 1 associated protein                                       | WTAP    | 702295 |
| Wingless-type MMTV integration site family member 3                    | WNT3    | 716909 |
| Wingless-type MMTV integration site family member 7B                   | WNT7B   | 713864 |
| Wiskott-Aldrich syndrome-like                                          | WASL    | 696556 |
| Wolfram syndrome 1 (wolframin)                                         | WFS1    | 710948 |
| WW domain binding protein 1                                            | WBP1    | 709202 |
| WW domain binding protein 11                                           | WBP11   | 699451 |
| WW domain binding protein 4                                            | WBP4    | 698220 |
| WW domain binding protein 5                                            | WBP5    | 696661 |
| WW domain containing adaptor with coiled-coil                          | WAC     | 715828 |
| WW domain containing E3 ubiquitin protein ligase 2                     | WWP2    | 705464 |
| X-box binding protein 1                                                | XBP1    | 713863 |
| Xeroderma pigmentosum, complementation group A                         | XPA     | 715705 |
| Xeroderma pigmentosum, complementation group C                         | XPC     | 700938 |
| X-prolyl aminopeptidase (aminopeptidase P) 1, soluble                  | XPNPEP1 | 696570 |
| X-ray repair complementing defective repair in Chinese hamster cells 5 | XRCC5   | 574279 |
| X-ray repair complementing defective repair in Chinese hamster cells 6 | XRCC6   | 707975 |
| Yae1 domain containing 1                                               | YAE1D1  | 703786 |
| Y-box binding protein 3                                                | YBX3    | 722347 |
| YEATS domain containing 4                                              | YEATS4  | 718376 |
| Yip1 domain family member 1                                            | YIPF1   | 714632 |
| Yip1 domain family member 4                                            | YIPF4   | 706819 |
| Yippee like 3                                                          | YPEL3   | 708740 |
| Yippee like 5                                                          | YPEL5   | 704532 |
| YKT6 v-SNARE homolog (S. Cerevisiae)                                   | YKT6    | 699606 |
| YTH domain containing 1                                                | YTHDC1  | 709717 |
| YTH N(6)-methyladenosine RNA binding protein 1                         | YTHDF1  | 697816 |
| YTH N(6)-methyladenosine RNA binding protein 2                         | YTHDF2  | 717225 |
| ZFP36 ring finger protein                                              | ZFP36   | 722000 |
| Zinc binding alcohol dehydrogenase domain containing 2                 | ZADH2   | 701079 |
| Zinc finger (CCCH type), RNA binding motif and serine/arginine rich 2  | ZRSR2   | 720986 |
| Zinc finger and BTB domain containing 17                               | ZBTB17  | 696327 |
| Zinc finger and BTB domain containing 33                               | ZBTB33  | 695801 |
| Zinc finger and BTB domain containing 39                               | ZBTB39  | 713914 |
| Zinc finger and BTB domain containing 40                               | ZBTB40  | 708181 |
| Zinc finger and BTB domain containing 48                               | ZBTB48  | 704628 |
| Zinc finger and BTB domain containing 49                               | ZBTB49  | 712422 |
| Zinc finger and BTB domain containing 5                                | ZBTB5   | 718482 |
| Zinc finger and BTB domain containing 8 opposite strand                | ZBTB8OS | 708590 |
| Zinc finger and SCAN domain containing 2                               | ZSCAN2  | 695673 |
| Zinc finger and SCAN domain containing 2                               | ZSCAN2  | 695673 |



|                                           |         |           |
|-------------------------------------------|---------|-----------|
| Zinc finger and SCAN domain containing 21 | ZSCAN21 | 710501    |
| Zinc finger and SCAN domain containing 29 | ZSCAN29 | 710414    |
| Zinc finger CCCH-type containing 12A      | ZC3H12A | 713604    |
| Zinc finger CCCH-type containing 3        | ZC3H3   | 708584    |
| Zinc finger CCCH-type containing 7A       | ZC3H7A  | 711984    |
| Zinc finger E-box binding homeobox 2      | ZEB2    | 705439    |
| Zinc finger protein 140                   | ZNF140  | 695171    |
| Zinc finger protein 143                   | ZNF143  | 703978    |
| Zinc finger protein 155                   | ZNF155  | 712736    |
| Zinc finger protein 17                    | ZNF17   | 707664    |
| Zinc finger protein 177                   | ZNF177  | 709851    |
| Zinc finger protein 180                   | ZNF180  | 712493    |
| Zinc finger protein 181                   | ZNF181  | 106992423 |
| Zinc finger protein 207                   | ZNF207  | 100689489 |
| Zinc finger protein 217                   | ZNF217  | 699314    |
| Zinc finger protein 22                    | ZNF22   | 706208    |
| Zinc finger protein 250                   | ZNF250  | 704805    |
| Zinc finger protein 285                   | ZNF285  | 106994795 |
| Zinc finger protein 296                   | ZNF296  | 713620    |
| Zinc finger protein 319                   | ZNF319  | 706286    |
| Zinc finger protein 32                    | ZNF32   | 705373    |
| Zinc finger protein 322                   | ZNF322  | 701098    |
| Zinc finger protein 343                   | ZNF343  | 716613    |
| Zinc finger protein 354B                  | ZNF354B | 712885    |
| Zinc finger protein 362                   | ZNF362  | 710013    |
| Zinc finger protein 385A                  | ZNF385A | 705436    |
| Zinc finger protein 41                    | ZNF41   | 706770    |
| Zinc finger protein 410                   | ZNF410  | 698124    |
| Zinc finger protein 436                   | ZNF436  | 709638    |
| Zinc finger protein 462                   | ZNF462  | 711489    |
| Zinc finger protein 467                   | ZNF467  | 712106    |
| Zinc finger protein 496                   | ZNF496  | 709694    |
| Zinc finger protein 521                   | ZNF521  | 709169    |
| Zinc finger protein 526                   | ZNF526  | 707135    |
| Zinc finger protein 532                   | ZNF532  | 701146    |
| Zinc finger protein 574                   | ZNF574  | 706729    |
| Zinc finger protein 613                   | ZNF613  | 719851    |
| Zinc finger protein 620                   | ZNF620  | 100423711 |
| Zinc finger protein 622                   | ZNF622  | 100429385 |
| Zinc finger protein 627                   | ZNF627  | 716820    |
| Zinc finger protein 646                   | ZNF646  | 712774    |
| Zinc finger protein 653                   | ZNF653  | 714754    |
| Zinc finger protein 664                   | ZNF664  | 710703    |
| Zinc finger protein 687                   | ZNF687  | 716590    |
| Zinc finger protein 692                   | ZNF692  | 710010    |
| Zinc finger protein 7                     | ZNF7    | 715735    |
| Zinc finger protein 70                    | ZNF70   | 698442    |
| Zinc finger protein 777                   | ZNF777  | 711987    |

|                                                 |          |           |
|-------------------------------------------------|----------|-----------|
| Zinc finger protein 79                          | ZNF79    | 700961    |
| Zinc finger protein 821                         | ZNF821   | 707355    |
| Zinc finger protein 830                         | ZNF830   | 715130    |
| Zinc finger protein 84                          | ZNF84    | 694939    |
| Zinc finger protein 92                          | ZNF92    | 708683    |
| Zinc finger RNA binding protein                 | ZFR      | 696882    |
| Zinc finger with UFM1-specific peptidase domain | ZUFSP    | 718059    |
| Zinc finger, AN1-type domain 2A                 | ZFAND2A  | 100426344 |
| Zinc finger, AN1-type domain 2B                 | ZFAND2B  | 702027    |
| Zinc finger, AN1-type domain 6                  | ZFAND6   | 717543    |
| Zinc finger, C3H1-type containing               | ZFC3H1   | 718671    |
| Zinc finger, CCCH-type with G-patch domain      | ZGPAT    | 719499    |
| Zinc finger, CCCH-type with G-patch domain      | ZGPAT    | 719499    |
| Zinc finger, CCCH-type with G-patch domain      | ZGPAT    | 719499    |
| Zinc finger, CCHC domain containing 10          | ZCCHC10  | 709423    |
| Zinc finger, CCHC domain containing 11          | ZCCHC11  | 713406    |
| Zinc finger, CCHC domain containing 14          | ZCCHC14  | 703833    |
| Zinc finger, CCHC domain containing 17          | ZCCHC17  | 705172    |
| Zinc finger, CCHC domain containing 3           | ZCCHC3   | 714477    |
| Zinc finger, CCHC domain containing 7           | ZCCHC7   | 716658    |
| Zinc finger, CCHC domain containing 8           | ZCCHC8   | 702359    |
| Zinc finger, DHHC-type containing 12            | ZDHHC12  | 722606    |
| Zinc finger, DHHC-type containing 16            | ZDHHC16  | 705982    |
| Zinc finger, DHHC-type containing 17            | ZDHHC17  | 693595    |
| Zinc finger, DHHC-type containing 5             | ZDHHC5   | 704863    |
| Zinc finger, DHHC-type containing 6             | ZDHHC6   | 696538    |
| Zinc finger, FYVE domain containing 16          | ZFYVE16  | 710872    |
| Zinc finger, matrin-type 2                      | ZMAT2    | 697247    |
| Zinc finger, matrin-type 5                      | ZMAT5    | 715058    |
| Zinc finger, MYM-type 2                         | ZMYM2    | 721255    |
| Zinc finger, MYM-type 3                         | ZMYM3    | 697147    |
| Zinc finger, MYM-type 4                         | ZMYM4    | 712793    |
| Zinc finger, MYND-type containing 11            | ZMYND11  | 708761    |
| Zinc finger, RAN-binding domain containing 2    | ZRANB2   | 703513    |
| Zinc finger, SWIM-type containing 3             | ZSWIM3   | 708804    |
| Zinc finger, ZZ-type with EF-hand domain 1      | ZZEF1    | 721518    |
| Zinc metalloproteinase STE24                    | ZMPSTE24 | 693765    |
| Zinc ribbon domain containing 1                 | ZNRD1    | 712151    |
| Zona pellucida glycoprotein 2 (sperm receptor)  | ZP2      | 697458    |
| Zona pellucida glycoprotein 3 (sperm receptor)  | ZP3      | 719925    |
| Zyg-11 related, cell cycle regulator            | ZER1     | 717262    |

---

**(3) Expressed in both groups 1b and 1c, but not in group 1a**

---

|                                                |        |        |
|------------------------------------------------|--------|--------|
| 1-acylglycerol-3-phosphate O-acyltransferase 1 | AGPAT1 | 717174 |
| 2'-5'-oligoadenylate synthetase 1              | OAS1   | 712265 |
| 2'-5'-oligoadenylate synthetase-like           | OASL   | 698943 |

|                                                                                  |          |        |
|----------------------------------------------------------------------------------|----------|--------|
| 3-hydroxyanthranilate 3,4-dioxygenase                                            | HAAO     | 713101 |
| 3-hydroxymethyl-3-methylglutaryl-coa lyase-like 1                                | HMGCLL1  | 714982 |
| 5,10-methenyltetrahydrofolate synthetase (5-formyltetrahydrofolate cyclo-ligase) | MTHFS    | 717493 |
| 5-hydroxytryptamine (serotonin) receptor 1A, G protein-coupled                   | HTR1A    | 694991 |
| 5-hydroxytryptamine (serotonin) receptor 1B, G protein-coupled                   | HTR1B    | 716704 |
| 5-hydroxytryptamine (serotonin) receptor 1E, G protein-coupled                   | HTR1E    | 697598 |
| 5-hydroxytryptamine (serotonin) receptor 2C, G protein-coupled                   | HTR2C    | 708141 |
| 5-hydroxytryptamine (serotonin) receptor 3B, ionotropic                          | HTR3B    | 694830 |
| 5-hydroxytryptamine (serotonin) receptor 4, G protein-coupled                    | HTR4     | 710046 |
| 5-hydroxytryptamine (serotonin) receptor 5A, G protein-coupled                   | HTR5A    | 716134 |
| 5-phosphohydroxy-L-lysine phospho-lyase                                          | PHYKPL   | 702302 |
| 8-oxoguanine DNA glycosylase                                                     | OGG1     | 700481 |
| Aarf domain containing kinase 2                                                  | ADCK2    | 693303 |
| Aarf domain containing kinase 4                                                  | ADCK4    | 702379 |
| Abhydrolase domain containing 1                                                  | ABHD1    | 698700 |
| Abhydrolase domain containing 16B                                                | ABHD16B  | 695048 |
| Abhydrolase domain containing 8                                                  | ABHD8    | 718980 |
| Achaete-scute family bhlh transcription factor 1                                 | ASCL1    | 698820 |
| Achaete-scute family bhlh transcription factor 4                                 | ASCL4    | 704632 |
| Acid phosphatase 7, tartrate resistant (putative)                                | ACP7     | 695532 |
| Acid sensing ion channel subunit 3                                               | ASIC3    | 714396 |
| Acid sensing ion channel subunit family member 5                                 | ASIC5    | 699617 |
| Acidic nuclear phosphoprotein 32 family member E                                 | ANP32E   | 706251 |
| Acrosin binding protein                                                          | ACRBP    | 713219 |
| Acrosomal vesicle protein 1                                                      | ACRV1    | 713422 |
| Actin like 6B                                                                    | ACTL6B   | 712643 |
| Actin like 7A                                                                    | ACTL7A   | 710653 |
| Actin like 7B                                                                    | ACTL7B   | 710750 |
| Actin like 8                                                                     | ACTL8    | 701280 |
| Actin related protein T2                                                         | ACTRT2   | 711475 |
| Actinin, alpha 2                                                                 | ACTN2    | 710012 |
| Activating transcription factor 3                                                | ATF3     | 710832 |
| Activin A receptor type IB                                                       | ACVR1B   | 696587 |
| Activin A receptor type IL                                                       | ACVRL1   | 696471 |
| Acyl-coa thioesterase 12                                                         | ACOT12   | 711665 |
| Acyl-coa wax alcohol acyltransferase 2                                           | AWAT2    | 696451 |
| ADAM metallopeptidase domain 19                                                  | ADAM19   | 715164 |
| ADAM metallopeptidase domain 2                                                   | ADAM2    | 707303 |
| ADAM metallopeptidase domain 21                                                  | ADAM21   | 715640 |
| ADAM metallopeptidase domain 29                                                  | ADAM29   | 698113 |
| ADAM metallopeptidase with thrombospondin type 1 motif 14                        | ADAMTS14 | 710154 |
| ADAM metallopeptidase with thrombospondin type 1 motif 15                        | ADAMTS15 | 715608 |
| ADAM metallopeptidase with thrombospondin type 1 motif 16                        | ADAMTS16 | 694474 |
| ADAM metallopeptidase with thrombospondin type 1 motif 17                        | ADAMTS17 | 693447 |
| ADAM metallopeptidase with thrombospondin type 1 motif 20                        | ADAMTS20 | 699935 |
| ADAM-like, decysin 1                                                             | ADAMDEC1 | 711034 |
| ADAMTS like 2                                                                    | ADAMTSL2 | 713492 |

|                                                                                                                        |        |           |
|------------------------------------------------------------------------------------------------------------------------|--------|-----------|
| Adaptor related protein complex 1 associated regulatory protein                                                        | AP1AR  | 700734    |
| Adaptor related protein complex 2, mu 1 subunit                                                                        | AP2M1  | 703554    |
| Adaptor related protein complex 3, beta 2 subunit                                                                      | AP3B2  | 694091    |
| Adaptor related protein complex 5, beta 1 subunit                                                                      | AP5B1  | 721904    |
| Adenosine A3 receptor                                                                                                  | ADORA3 | 704295    |
| Adenosine deaminase domain containing 1                                                                                | ADAD1  | 707910    |
| Adenosine deaminase, trna-specific 1                                                                                   | ADAT1  | 712066    |
| Adenylate cyclase 4                                                                                                    | ADCY4  | 714684    |
| Adenylate cyclase 6                                                                                                    | ADCY6  | 707978    |
| Adenylate cyclase 8 (brain)                                                                                            | ADCY8  | 695792    |
| Adenylate kinase 8                                                                                                     | AK8    | 714698    |
| Adhesion G protein-coupled receptor F4                                                                                 | ADGRF4 | 100425760 |
| Adhesion G protein-coupled receptor G3                                                                                 | ADGRG3 | 705580    |
| Adhesion G protein-coupled receptor G5                                                                                 | ADGRG5 | 711378    |
| Adhesion G protein-coupled receptor G7                                                                                 | ADGRG7 | 700839    |
| Adhesion molecule with Ig-like domain 2                                                                                | AMIGO2 | 705386    |
| Adhesion molecule with Ig-like domain 3                                                                                | AMIGO3 | 705693    |
| ADP-ribosyltransferase 1                                                                                               | ART1   | 718154    |
| ADP-ribosyltransferase 3                                                                                               | ART3   | 100424032 |
| ADP-ribosyltransferase 4 (Dombrock blood group)                                                                        | ART4   | 699934    |
| Adrenoceptor alpha 1A                                                                                                  | ADRA1A | 712509    |
| Adrenoceptor alpha 2A                                                                                                  | ADRA2A | 695684    |
| Adrenoceptor beta 1                                                                                                    | ADRB1  | 100426600 |
| Adrenoceptor beta 2                                                                                                    | ADRB2  | 710146    |
| AF4/FMR2 family member 2                                                                                               | AFF2   | 700758    |
| Agouti related neuropeptide                                                                                            | AGRP   | 698479    |
| A-kinase anchoring protein 12                                                                                          | AKAP12 | 641446    |
| A-kinase anchoring protein 4                                                                                           | AKAP4  | 694888    |
| Aladin WD repeat nucleoporin                                                                                           | AAAS   | 719095    |
| Aldo-keto reductase family 1, member A1 (aldehyde reductase)                                                           | AKR1A1 | 693380    |
| Aldo-keto reductase family 1, member C1 (dihydrodiol dehydrogenase 1; 20-alpha (3-alpha)-hydroxysteroid dehydrogenase) | AKR1C1 | 711198    |
| Aldo-keto reductase family 1, member D1                                                                                | AKR1D1 | 709863    |
| Alkaline ceramidase 1                                                                                                  | ACER1  | 699093    |
| Alkb homolog 2, alpha-ketoglutarate-dependent dioxygenase                                                              | ALKBH2 | 706708    |
| Alkb homolog 4, lysine demethylase                                                                                     | ALKBH4 | 715078    |
| Allantoicase                                                                                                           | ALLC   | 707445    |
| Alpha 1,4-galactosyltransferase                                                                                        | A4GALT | 710998    |
| Alpha hemoglobin stabilizing protein                                                                                   | AHSP   | 714392    |
| Alpha-1,4-N-acetylglucosaminyltransferase                                                                              | A4GNT  | 716512    |
| Alpha-2-glycoprotein 1, zinc-binding                                                                                   | AZGP1  | 710136    |
| Alpha-2-HS-glycoprotein                                                                                                | AHSG   | 699348    |
| Alpha-fetoprotein                                                                                                      | AFP    | 704786    |
| Ameloblastin                                                                                                           | AMBN   | 706845    |
| Amine oxidase, copper containing 2                                                                                     | AOC2   | 100431016 |
| Aminoacylase 3                                                                                                         | ACY3   | 711083    |
| Aminocarboxymuconate semialdehyde decarboxylase                                                                        | ACMSD  | 708917    |

|                                                                               |          |           |
|-------------------------------------------------------------------------------|----------|-----------|
| Amphiregulin                                                                  | AREG     | 702396    |
| Amyloid beta (A4) precursor protein-binding, family B, member 1 (Fe65)        | APBB1    | 712585    |
| Amyloid beta (A4) precursor-like protein 2                                    | APLP2    | 718819    |
| Amyloid P component, serum                                                    | APCS     | 719421    |
| Anaphase promoting complex subunit 2                                          | ANAPC2   | 706384    |
| Ancient ubiquitous protein 1                                                  | AUP1     | 710020    |
| Angiopoietin 4                                                                | ANGPT4   | 715213    |
| Angiopoietin like 5                                                           | ANGPTL5  | 702036    |
| Angiopoietin like 7                                                           | ANGPTL7  | 714204    |
| ANKH inorganic pyrophosphate transport regulator                              | ANKH     | 717689    |
| Ankyrin repeat and IBR domain containing 1                                    | ANKIB1   | 703273    |
| Ankyrin repeat and SOCS box containing 11                                     | ASB11    | 712435    |
| Ankyrin repeat and SOCS box containing 15                                     | ASB15    | 695656    |
| Ankyrin repeat and SOCS box containing 3                                      | ASB3     | 716503    |
| Ankyrin repeat domain 1 (cardiac muscle)                                      | ANKRD1   | 696653    |
| Ankyrin repeat domain 13C                                                     | ANKRD13C | 702811    |
| Ankyrin repeat domain 2 (stretch responsive muscle)                           | ANKRD2   | 707097    |
| Ankyrin repeat domain 44                                                      | ANKRD44  | 696592    |
| Ankyrin repeat domain 49                                                      | ANKRD49  | 697693    |
| Ankyrin repeat domain 50                                                      | ANKRD50  | 709327    |
| Ankyrin repeat domain 55                                                      | ANKRD55  | 710177    |
| Ankyrin repeat domain 6                                                       | ANKRD6   | 701339    |
| Ankyrin repeat, SAM and basic leucine zipper domain containing 1              | ASZ1     | 705097    |
| Annexin A13                                                                   | ANXA13   | 705013    |
| Anoctamin 3                                                                   | ANO3     | 700072    |
| Anthrax toxin receptor 1                                                      | ANTXR1   | 100425392 |
| Anti-silencing function 1A histone chaperone                                  | ASF1A    | 714761    |
| Apelin receptor                                                               | APLNR    | 706823    |
| Apolipoprotein A-I                                                            | APOA1    | 696969    |
| Apolipoprotein A-II                                                           | APOA2    | 719946    |
| Apolipoprotein B mRNA editing enzyme, catalytic polypeptide-like 2            | APOBEC2  | 719677    |
| Apolipoprotein B mRNA editing enzyme, catalytic polypeptide-like 3G           | APOBEC3G | 574398    |
| Apolipoprotein B mRNA editing enzyme, catalytic polypeptide-like 3H           | APOBEC3H | 723811    |
| Apolipoprotein B mRNA editing enzyme, catalytic polypeptide-like 4 (putative) | APOBEC4  | 714993    |
| Apolipoprotein C-III                                                          | APOC3    | 696726    |
| Apolipoprotein F                                                              | APOF     | 712761    |
| Apolipoprotein L4                                                             | APOL4    | 694250    |
| Apoptosis inducing factor, mitochondria associated 1                          | AIFM1    | 702773    |
| Apoptosis inducing factor, mitochondria associated 3                          | AIFM3    | 100430576 |
| Aprataxin                                                                     | APTXX    | 702671    |
| Aquaporin 11                                                                  | AQP11    | 698835    |
| Aquaporin 4                                                                   | AQP4     | 703773    |

|                                                                           |          |           |
|---------------------------------------------------------------------------|----------|-----------|
| Aquaporin 8                                                               | AQP8     | 702167    |
| Aquaporin 9                                                               | AQP9     | 700743    |
| Arachidonate 15-lipoxygenase                                              | ALOX15   | 709212    |
| Arachidonate 5-lipoxygenase-activating protein                            | ALOX5AP  | 713170    |
| Arfgap with rhogap domain, ankyrin repeat and PH domain 3                 | ARAP3    | 701400    |
| Arginine vasopressin receptor 1B                                          | AVPR1B   | 695963    |
| Arginine vasopressin receptor 2                                           | AVPR2    | 697763    |
| Arginine/serine-rich coiled-coil 2                                        | RSRC2    | 706564    |
| ARP3 actin-related protein 3 homolog B (yeast)                            | ACTR3B   | 715965    |
| Artemin                                                                   | ARTN     | 701641    |
| Aryl hydrocarbon receptor interacting protein-like 1                      | AIPL1    | 574331    |
| Arylacetamide deacetylase-like 2                                          | AADACL2  | 709222    |
| Ash2 (absent, small, or homeotic)-like (Drosophila)                       | ASH2L    | 699382    |
| Aspartate beta-hydroxylase domain containing 2                            | ASPHD2   | 712623    |
| Ataxin 2-like                                                             | ATXN2L   | 708359    |
| Atonal bhlh transcription factor 1                                        | ATOH1    | 704893    |
| ATP binding cassette subfamily B member 9                                 | ABCB9    | 707709    |
| ATP binding cassette subfamily C member 9                                 | ABCC9    | 654489    |
| ATP binding cassette subfamily D member 2                                 | ABCD2    | 697556    |
| ATP binding cassette subfamily G member 2<br>(Junior blood group)         | ABCG2    | 574307    |
| ATP binding cassette subfamily G member 8                                 | ABCG8    | 713676    |
| ATP citrate lyase                                                         | ACLY     | 708501    |
| ATP synthase F0 subunit 6                                                 | ATP6     | 2846629   |
| ATP synthase mitochondrial F1 complex assembly factor 2                   | ATPAF2   | 699709    |
| ATPase, Ca <sup>++</sup> transporting, ubiquitous                         | ATP2A3   | 707768    |
| ATPase, class II, type 9A                                                 | ATP9A    | 710250    |
| ATPase, H <sup>+</sup> transporting, lysosomal 14kda, V1 subunit F        | ATP6V1F  | 702112    |
| ATPase, H <sup>+</sup> transporting, lysosomal 31kda, V1 subunit E2       | ATP6V1E2 | 714746    |
| ATPase, H <sup>+</sup> /K <sup>+</sup> exchanging, alpha polypeptide      | ATP4A    | 100426216 |
| ATPase, H <sup>+</sup> /K <sup>+</sup> exchanging, beta polypeptide       | ATP4B    | 698222    |
| ATPase, Na <sup>+</sup> /K <sup>+</sup> transporting, alpha 3 polypeptide | ATP1A3   | 706513    |
| ATPase, Na <sup>+</sup> /K <sup>+</sup> transporting, beta 2 polypeptide  | ATP1B2   | 716093    |
| ATP-binding cassette transporter 13                                       | ABCC13   | 574326    |
| Atypical chemokine receptor 1 (Duffy blood group)                         | ACKR1    | 719284    |
| Autophagy related 2A                                                      | ATG2A    | 717290    |
| Autophagy related 7                                                       | ATG7     | 696238    |
| Autophagy related 9B                                                      | ATG9B    | 714284    |
| B and T lymphocyte associated                                             | BTLA     | 708202    |
| B9 protein domain 2                                                       | B9D2     | 704873    |
| BAI1-associated protein 2-like 2                                          | BAIAP2L2 | 700058    |
| Bardet-Biedl syndrome 9                                                   | BBS9     | 708412    |
| Barttin CLCNK-type chloride channel accessory beta subunit                | BSND     | 715740    |
| Basic leucine zipper transcription factor, ATF-like 2                     | BATF2    | 722022    |
| Basic transcription factor 3-like 4                                       | BTF3L4   | 712955    |
| Basonuclin 1                                                              | BNC1     | 718655    |
| B-cell CLL/lymphoma 9                                                     | BCL9     | 700800    |
| B-cell receptor-associated protein 31                                     | BCAP31   | 696663    |

|                                                             |           |           |
|-------------------------------------------------------------|-----------|-----------|
| BCL2 associated athanogene 2                                | BAG2      | 712778    |
| BCL2 associated athanogene 4                                | BAG4      | 703953    |
| BCL2/adenovirus E1B 19kda interacting protein 1             | BNIP1     | 703576    |
| BCL2/adenovirus E1B 19kda interacting protein 2             | BNIP2     | 703234    |
| BCL2-associated X protein                                   | BAX       | 718948    |
| BCS1-like (S. Cerevisiae)                                   | BCS1L     | 699690    |
| Beclin 1, autophagy related                                 | BECN1     | 711649    |
| BEN domain containing 4                                     | BEND4     | 702395    |
| Beta-1,3-galactosyltransferase 1                            | B3GALT1   | 704744    |
| Beta-1,3-galactosyltransferase 2                            | B3GALT2   | 712334    |
| Beta-1,3-galactosyltransferase 4                            | B3GALT4   | 718178    |
| Beta-1,3-galactosyltransferase 5                            | B3GALT5   | 715466    |
| Beta-1,3-glucuronyltransferase 1                            | B3GAT1    | 695293    |
| Beta-1,3-glucuronyltransferase 2                            | B3GAT2    | 717157    |
| Beta-1,4-glucuronyltransferase 1                            | B4GAT1    | 714270    |
| Beta-1,4-N-acetyl-galactosaminyl transferase 3              | B4GALNT3  | 706259    |
| Beta-2-microglobulin                                        | B2M       | 712428    |
| Beta-carotene oxygenase 2                                   | BCO2      | 712095    |
| Bile acid-coa:amino acid N-acyltransferase                  | BAAT      | 100429416 |
| Biogenesis of lysosomal organelles complex-1, subunit 3     | BLOC1S3   | 713932    |
| Bloom syndrome, recq helicase-like                          | BLM       | 703460    |
| Bone morphogenetic protein 1                                | BMP1      | 707596    |
| Bone morphogenetic protein 15                               | BMP15     | 695457    |
| Bone morphogenetic protein 3                                | BMP3      | 695432    |
| Bone morphogenetic protein 5                                | BMP5      | 711989    |
| Bone morphogenetic protein receptor type IA                 | BMPRIIA   | 696898    |
| Boule homolog, RNA binding protein                          | BOLL      | 698402    |
| BPI fold containing family A member 2                       | BPIFA2    | 710376    |
| BPI fold containing family B member 1                       | BPIFB1    | 710014    |
| BPI fold containing family B member 4                       | BPIFB4    | 714667    |
| BPI fold containing family C                                | BPIFC     | 717287    |
| Brain and reproductive organ-expressed (TNFRSF1A modulator) | BRE       | 702365    |
| Breast cancer anti-estrogen resistance 1                    | BCAR1     | 713965    |
| BRICHOS domain containing 5                                 | BRICD5    | 695765    |
| Bromodomain adjacent to zinc finger domain 1B               | BAZ1B     | 716436    |
| Bromodomain containing 2                                    | BRD2      | 717893    |
| Bromodomain containing 8                                    | BRD8      | 716492    |
| Bruton agammaglobulinemia tyrosine kinase                   | BTK       | 703000    |
| BTB (POZ) domain containing 9                               | BTBD9     | 719457    |
| BTG family member 4                                         | BTG4      | 709946    |
| C1GALT1 specific chaperone 1                                | C1GALT1C1 | 696662    |
| C1q and tumor necrosis factor related protein 7             | C1QTNF7   | 714049    |
| Cadherin 11, type 2, OB-cadherin (osteoblast)               | CDH11     | 708826    |
| Cadherin 16                                                 | CDH16     | 697166    |
| Cadherin 17, LI cadherin (liver-intestine)                  | CDH17     | 698886    |
| Cadherin 19, type 2                                         | CDH19     | 702726    |
| Cadherin 7, type 2                                          | CDH7      | 702481    |

|                                                                           |          |           |
|---------------------------------------------------------------------------|----------|-----------|
| Cadherin related family member 2                                          | CDHR2    | 697249    |
| Calcium binding protein 4                                                 | CABP4    | 711973    |
| Calcium channel, voltage-dependent, alpha 2/delta subunit 1               | CACNA2D1 | 708215    |
| Calcium channel, voltage-dependent, beta 4 subunit                        | CACNB4   | 695172    |
| Calcium homeostasis modulator 2                                           | CALHM2   | 714662    |
| Calcium/calmodulin-dependent protein kinase I                             | CAMK1    | 700212    |
| Calcium/calmodulin-dependent protein kinase II delta                      | CAMK2D   | 702504    |
| Calcium/calmodulin-dependent protein kinase IV                            | CAMK4    | 712322    |
| Calcium/calmodulin-dependent protein kinase kinase 1, alpha               | CAMKK1   | 707562    |
| Calcium/calmodulin-dependent serine protein kinase<br>(MAGUK family)      | CASK     | 707428    |
| Calcium-binding protein, spermatid-specific 1                             | CABS1    | 707584    |
| Caldesmon 1                                                               | CALD1    | 707050    |
| Calicin                                                                   | CCIN     | 693791    |
| Calpain 2, (m/II) large subunit                                           | CAPN2    | 703047    |
| Calponin 3, acidic                                                        | CNN3     | 709538    |
| Calreticulin                                                              | CALR     | 716910    |
| Camp regulated phosphoprotein 21kda                                       | ARPP21   | 707139    |
| Camp responsive element modulator                                         | CREM     | 698636    |
| Cannabinoid receptor 2                                                    | CNR2     | 711155    |
| Cap methyltransferase 2                                                   | CMTR2    | 711529    |
| Capping protein (actin filament) muscle Z-line, alpha 3                   | CAPZA3   | 703410    |
| Carbamoyl-phosphate synthase 1                                            | CPS1     | 711806    |
| Carbohydrate (keratan sulfate Gal-6) sulfotransferase 1                   | CHST1    | 715176    |
| Carbohydrate (N-acetylgalactosamine 4-O) sulfotransferase 9               | CHST9    | 703877    |
| Carbohydrate (N-acetylgalactosamine 4-sulfate 6-O)<br>sulfotransferase 15 | CHST15   | 693845    |
| Carbohydrate (N-acetylglucosamine 6-O) sulfotransferase 4                 | CHST4    | 708116    |
| Carbohydrate (N-acetylglucosamine 6-O) sulfotransferase 7                 | CHST7    | 704906    |
| Carbonic anhydrase VII                                                    | CA7      | 696681    |
| Carbonic anhydrase X                                                      | CA10     | 704971    |
| Carbonic anhydrase XI                                                     | CA11     | 718066    |
| Carboxypeptidase A1                                                       | CPA1     | 703095    |
| Carboxypeptidase A5                                                       | CPA5     | 702974    |
| Carboxypeptidase A6                                                       | CPA6     | 705117    |
| Carboxypeptidase B1                                                       | CPB1     | 712639    |
| Carboxypeptidase B2                                                       | CPB2     | 703317    |
| Carboxypeptidase N subunit 2                                              | CPN2     | 106997192 |
| Carnitine palmitoyltransferase 1A (liver)                                 | CPT1A    | 709837    |
| Carnosine dipeptidase 1 (metallopeptidase M20 family)                     | CNDP1    | 695195    |
| CART prepropeptide                                                        | CARTPT   | 701350    |
| Cas scaffolding protein family member 4                                   | CASS4    | 697924    |
| Casein beta                                                               | CSN2     | 707520    |
| Casein kappa                                                              | CSN3     | 707297    |
| Casein kinase 1, alpha 1-like                                             | CSNK1A1L | 695190    |
| Casein kinase 2, beta polypeptide                                         | CSNK2B   | 715807    |
| CASK interacting protein 2                                                | CASKIN2  | 702477    |
| Caspase 14                                                                | CASP14   | 718049    |



|                                                            |          |           |
|------------------------------------------------------------|----------|-----------|
| Caspase 8 associated protein 2                             | CASP8AP2 | 702294    |
| Caspase activity and apoptosis inhibitor 1                 | CAAP1    | 707992    |
| Caspase recruitment domain family member 18                | CARD18   | 705678    |
| Catalase                                                   | CAT      | 717406    |
| Cathepsin C                                                | CTSC     | 705320    |
| Cathepsin G                                                | CTSG     | 716440    |
| Cation channel, sperm associated 2                         | CATSPER2 | 710876    |
| Catsper channel auxiliary subunit beta                     | CATSPERB | 697012    |
| Caudal type homeobox 2                                     | CDX2     | 711094    |
| Caudal type homeobox 4                                     | CDX4     | 701374    |
| Caveolin 3                                                 | CAV3     | 702163    |
| Cbl proto-oncogene B, E3 ubiquitin protein ligase          | CBLB     | 703879    |
| CCCTC-binding factor (zinc finger protein)-like            | CTCFL    | 701500    |
| CCR4-NOT transcription complex subunit 1                   | CNOT1    | 712880    |
| CD14 molecule                                              | CD14     | 697482    |
| CD19 molecule                                              | CD19     | 705211    |
| CD1a molecule                                              | CD1A     | 698438    |
| CD1c molecule                                              | CD1C     | 717148    |
| CD1e molecule                                              | CD1E     | 718968    |
| CD200 receptor 1                                           | CD200R1  | 708734    |
| CD207 molecule, langerin                                   | CD207    | 703420    |
| CD274 molecule                                             | CD274    | 716043    |
| CD300 molecule like family member f                        | CD300LF  | 703830    |
| CD3g molecule, gamma (CD3-TCR complex)                     | CD3G     | 705270    |
| CD40 ligand                                                | CD40LG   | 574160    |
| CD53 molecule                                              | CD53     | 702350    |
| CD63 molecule                                              | CD63     | 709828    |
| CD69 molecule                                              | CD69     | 717288    |
| CD79b molecule                                             | CD79B    | 718218    |
| CD80 molecule                                              | CD80     | 732518    |
| CD8b molecule                                              | CD8B     | 699409    |
| Cell cycle exit and neuronal differentiation 1             | CEND1    | 100427040 |
| Cell death-inducing DFFA-like effector b                   | CIDEB    | 100425328 |
| Cell division cycle 14A                                    | CDC14A   | 716475    |
| Cell division cycle 6                                      | CDC6     | 700081    |
| Cell growth regulator with ring finger domain 1            | CGRRF1   | 695231    |
| Centrin 1                                                  | CETN1    | 697701    |
| Centrobin, centrosomal BRCA2 interacting protein           | CNTROB   | 716660    |
| Centromere protein I                                       | CENPI    | 702316    |
| Centrosomal protein 41kda                                  | CEP41    | 703215    |
| Centrosomal protein 44kda                                  | CEP44    | 697478    |
| Centrosomal protein 57kda-like 1                           | CEP57L1  | 700109    |
| Centrosomal protein 85kda-like                             | CEP85L   | 714810    |
| Ceramide synthase 3                                        | CERS3    | 693696    |
| Cerberus 1, DAN family BMP antagonist                      | CER1     | 713924    |
| Cerebellar degeneration-related protein 2-like             | CDR2L    | 700082    |
| Cerebral cavernous malformation 2                          | CCM2     | 705037    |
| Ceroid-lipofuscinosis, neuronal 6, late infantile, variant | CLN6     | 693873    |

|                                                         |              |           |
|---------------------------------------------------------|--------------|-----------|
| Ceruloplasmin (ferroxidase)                             | CP           | 712210    |
| Chaperonin containing TCP1, subunit 5 (epsilon)         | CCT5         | 696640    |
| Chemokine (C-C motif) ligand 18                         | CCL18        | 574181    |
| Chemokine (C-C motif) ligand 19                         | CCL19        | 574386    |
| Chemokine (C-C motif) ligand 2                          | CCL2         | 574138    |
| Chemokine (C-C motif) ligand 7                          | CCL7         | 714751    |
| Chemokine (C-C motif) receptor 4                        | CCR4         | 705457    |
| Chemokine (C-C motif) receptor 6                        | CCR6         | 574335    |
| Chemokine (C-C motif) receptor 8                        | CCR8         | 693806    |
| Chemokine (C-X3-C motif) ligand 1                       | CX3CL1       | 574225    |
| Chemokine (C-X3-C motif) receptor 1                     | CX3CR1       | 693926    |
| Chemokine (C-X-C motif) ligand 9                        | CXCL9        | 574336    |
| Chemokine (C-X-C motif) receptor 3                      | CXCR3        | 699438    |
| Chitinase domain containing 1                           | CHID1        | 701435    |
| Chloride channel accessory 2                            | CLCA2        | 711959    |
| Chloride channel, voltage-sensitive 3                   | CLCN3        | 694472    |
| Choline kinase beta                                     | CHKB         | 716377    |
| Choline O-acetyltransferase                             | CHAT         | 709977    |
| Cholinergic receptor, muscarinic 1                      | CHRM1        | 574362    |
| Cholinergic receptor, muscarinic 5                      | CHRM5        | 574330    |
| Cholinergic receptor, nicotinic alpha 3                 | CHRNA3       | 716571    |
| Chondroitin polymerizing factor                         | CHPF         | 703860    |
| Chondroitin sulfate N-acetylgalactosaminyltransferase 1 | CSGALNACT1   | 704901    |
| Choroideremia (Rab escort protein 1)                    | CHM          | 694499    |
| Chromodomain helicase DNA binding protein 3             | CHD3         | 716508    |
| Chromodomain helicase DNA binding protein 4             | CHD4         | 713162    |
| Chromosome 1 open reading frame, human c1orf100         | C1H1orf100   | 704944    |
| Chromosome 1 open reading frame, human c1orf111         | C1H1orf111   | 720087    |
| Chromosome 1 open reading frame, human c1orf168         | C1H1orf168   | 716080    |
| Chromosome 1 open reading frame, human c1orf189         | C1H1orf189   | 718569    |
| Chromosome 1 open reading frame, human c1orf198         | C1H1orf198   | 714084    |
| Chromosome 1 open reading frame, human c1orf54          | C1H1orf54    | 107000832 |
| Chromosome 10 open reading frame 93 ortholog            | C9H10orf93   | 719561    |
| Chromosome 10 open reading frame, human c20orf202       | C10H20orf202 | 717213    |
| Chromosome 11 open reading frame, human c12orf57        | C11H12orf57  | 714482    |
| Chromosome 11 open reading frame, human c12orf60        | C11H12orf60  | 699817    |
| Chromosome 12 open reading frame, human c2orf88         | C12H2orf88   | 100427288 |
| Chromosome 13 open reading frame, human c2orf16         | C13H2orf16   | 702215    |
| Chromosome 13 open reading frame, human c2orf49         | C13H2orf49   | 713165    |
| Chromosome 14 open reading frame, human c11orf84        | C14H11orf84  | 718112    |
| Chromosome 14 open reading frame, human c11orf87        | C14H11orf87  | 708608    |
| Chromosome 15 open reading frame, human c9orf131        | C15H9orf131  | 698029    |
| Chromosome 15 open reading frame, human c9orf16         | C15H9orf16   | 722628    |
| Chromosome 15 open reading frame, human c9orf84         | C15H9orf84   | 707991    |
| Chromosome 16 open reading frame, human c17orf49        | C16H17orf49  | 713820    |
| Chromosome 19 open reading frame, human c19orf24        | C19H19orf24  | 706393    |
| Chromosome 2 open reading frame, human c3orf30          | C2H3orf30    | 711824    |
| Chromosome 20 open reading frame, human c16orf45        | C20H16orf45  | 713757    |

|                                                         |             |           |
|---------------------------------------------------------|-------------|-----------|
| Chromosome 20 open reading frame, human c16orf78        | C20H16orf78 | 693672    |
| Chromosome 3 open reading frame, human c21orf91         | C3H21orf91  | 710406    |
| Chromosome 3 open reading frame, human c7orf61          | C3H7orf61   | 712150    |
| Chromosome 4 open reading frame, human c6orf15          | C4H6orf15   | 100141392 |
| Chromosome 4 open reading frame, human c6orf25          | C4H6orf25   | 716265    |
| Chromosome 5 open reading frame, human c4orf32          | C5H4orf32   | 700501    |
| Chromosome 5 open reading frame, human c4orf45          | C5H4orf45   | 100427200 |
| Chromosome 6 open reading frame, human c5orf22          | C6H5orf22   | 695901    |
| Chromosome 7 open reading frame, human c14orf166        | C7H14orf166 | 710094    |
| Chromosome 7 open reading frame, human c14orf169        | C7H14orf169 | 696773    |
| Chromosome 7 open reading frame, human c14orf177        | C7H14orf177 | 705010    |
| Chromosome 8 open reading frame, human c8orf59          | C8H8orf59   | 703464    |
| Chromosome 9 open reading frame, human c10orf120        | C9H10orf120 | 706212    |
| Chromosome 9 open reading frame, human c10orf62         | C9H10orf62  | 706769    |
| Chromosome 9 open reading frame, human c10orf90         | C9H10orf90  | 696655    |
| Chromosome X open reading frame, human cxorf21          | CXHXorf21   | 704259    |
| Chromosome X open reading frame, human cxorf40a         | CXHXorf40A  | 702659    |
| Chromosome X open reading frame, human cxorf58          | CXHXorf58   | 698265    |
| Chymotrypsin-like                                       | CTRL        | 701625    |
| Cilia and flagella associated protein 65                | CFAP65      | 701296    |
| Ciliary neurotrophic factor                             | CNTF        | 701907    |
| Ciliogenesis associated TTC17 interacting protein       | CATIP       | 698579    |
| CKLF-like MARVEL transmembrane domain containing 1      | CMTM1       | 715757    |
| CKLF-like MARVEL transmembrane domain containing 2      | CMTM2       | 693810    |
| Clarin 3                                                | CLRN3       | 697496    |
| Claudin 16                                              | CLDN16      | 704442    |
| Claudin 17                                              | CLDN17      | 705582    |
| Claudin 20                                              | CLDN20      | 701937    |
| Claudin 6                                               | CLDN6       | 699854    |
| Claudin 9                                               | CLDN9       | 699721    |
| Clavesin 2                                              | CLVS2       | 713626    |
| Cleavage and polyadenylation specific factor 1          | CPSF1       | 702082    |
| Cleavage and polyadenylation specific factor 4          | CPSF4       | 708119    |
| Cleft lip and palate associated transmembrane protein 1 | CLPTM1      | 718306    |
| CLOCK-interacting pacemaker                             | CIPC        | 704679    |
| Clpb homolog, mitochondrial AAA ATPase chaperonin       | CLPB        | 718461    |
| CMT1A duplicated region transcript 4                    | CDRT4       | 693912    |
| CNKSR family member 3                                   | CNKSR3      | 702627    |
| Coagulation factor XIII, A1 polypeptide                 | F13A1       | 711264    |
| Coagulation factor XIII, B polypeptide                  | F13B        | 711237    |
| Coatmer protein complex subunit epsilon                 | COPE        | 719631    |
| Cochlin                                                 | COCH        | 717114    |
| Cofilin 1 (non-muscle)                                  | CFL1        | 721882    |
| Cofilin 2 (muscle)                                      | CFL2        | 693875    |
| Coiled-coil domain containing 102B                      | CCDC102B    | 710808    |
| Coiled-coil domain containing 142                       | CCDC142     | 709014    |
| Coiled-coil domain containing 148                       | CCDC148     | 698322    |
| Coiled-coil domain containing 151                       | CCDC151     | 714600    |

|                                                                                      |         |           |
|--------------------------------------------------------------------------------------|---------|-----------|
| Coiled-coil domain containing 17                                                     | CCDC17  | 706591    |
| Coiled-coil domain containing 178                                                    | CCDC178 | 707566    |
| Coiled-coil domain containing 22                                                     | CCDC22  | 713063    |
| Coiled-coil domain containing 27                                                     | CCDC27  | 695384    |
| Coiled-coil domain containing 3                                                      | CCDC3   | 694884    |
| Coiled-coil domain containing 50                                                     | CCDC50  | 705459    |
| Coiled-coil domain containing 54                                                     | CCDC54  | 704648    |
| Coiled-coil domain containing 62                                                     | CCDC62  | 707179    |
| Coiled-coil domain containing 69                                                     | CCDC69  | 713304    |
| Coiled-coil domain containing 70                                                     | CCDC70  | 709312    |
| Coiled-coil domain containing 82                                                     | CCDC82  | 700198    |
| Coiled-coil domain containing 83                                                     | CCDC83  | 703306    |
| Coiled-coil domain containing 86                                                     | CCDC86  | 695978    |
| Coiled-coil domain containing 87                                                     | CCDC87  | 713677    |
| Coiled-coil domain containing 92                                                     | CCDC92  | 705922    |
| Coiled-coil serine rich protein 1                                                    | CCSER1  | 707418    |
| Coiled-coil serine rich protein 2                                                    | CCSER2  | 698006    |
| Coiled-coil-helix-coiled-coil-helix domain containing 2                              | CHCHD2  | 702967    |
| Colipase                                                                             | CLPS    | 719005    |
| Collagen, type II, alpha 1                                                           | COL2A1  | 704851    |
| Collagen, type III, alpha 1                                                          | COL3A1  | 574131    |
| Collagen, type VI, alpha 3                                                           | COL6A3  | 694701    |
| Collagen, type VIII, alpha 1                                                         | COL8A1  | 100423512 |
| Collagen, type VIII, alpha 2                                                         | COL8A2  | 713447    |
| Colony stimulating factor 2 receptor, beta, low-affinity<br>(granulocyte-macrophage) | CSF2RB  | 697508    |
| Colony stimulating factor 3                                                          | CSF3    | 698961    |
| Colony stimulating factor 3 receptor                                                 | CSF3R   | 713485    |
| COMM domain containing 2                                                             | COMMD2  | 711498    |
| COMM domain containing 5                                                             | COMMD5  | 704586    |
| COMM domain containing 9                                                             | COMMD9  | 716992    |
| Complement component 1, q subcomponent, C chain                                      | C1QC    | 708589    |
| Complement component 1, q subcomponent-like 1                                        | C1QL1   | 715801    |
| Complement component 1, q subcomponent-like 3                                        | C1QL3   | 100429968 |
| Complement component 1, s subcomponent                                               | C1S     | 714589    |
| Complement component 3a receptor 1                                                   | C3AR1   | 716086    |
| Complement component 4 binding protein, beta                                         | C4BPB   | 693636    |
| Complement component 7                                                               | C7      | 696926    |
| Complement component 8, alpha polypeptide                                            | C8A     | 716114    |
| Complement component 9                                                               | C9      | 694223    |
| Complement factor properdin                                                          | CFP     | 707386    |
| Complexin 4                                                                          | CPLX4   | 697217    |
| Connector enhancer of kinase suppressor of Ras 2                                     | CNKSR2  | 696046    |
| Contactin 1                                                                          | CNTN1   | 574365    |
| Contactin 2                                                                          | CNTN2   | 574333    |
| Contactin 5                                                                          | CNTN5   | 700826    |
| Contactin 6                                                                          | CNTN6   | 705207    |
| Contactin associated protein 1                                                       | CNTNAP1 | 574229    |

|                                                                     |         |           |
|---------------------------------------------------------------------|---------|-----------|
| Contactin associated protein-like 5                                 | CNTNAP5 | 697828    |
| Copine III                                                          | CPNE3   | 694013    |
| Cornichon family AMPA receptor auxiliary protein 1                  | CNIH1   | 695002    |
| Cornulin                                                            | CRNN    | 712894    |
| Corticotropin releasing hormone                                     | CRH     | 702877    |
| COX19 cytochrome c oxidase assembly homolog<br>(S. Cerevisiae)      | COX19   | 696368    |
| Creatine kinase, brain                                              | CKB     | 711167    |
| CREB regulated transcription coactivator 3                          | CRTC3   | 709458    |
| Crumbs family member 3                                              | CRB3    | 700086    |
| Cryptochrome circadian clock 2                                      | CRY2    | 715000    |
| Crystallin beta B3                                                  | CRYBB3  | 711554    |
| Crystallin gamma B                                                  | CRYGB   | 711767    |
| Crystallin gamma N                                                  | CRYGN   | 715040    |
| Crystallin, gamma C                                                 | CRYGC   | 709553    |
| C-src tyrosine kinase                                               | CSK     | 702868    |
| CTD small phosphatase 1                                             | CTDSP1  | 698824    |
| CTD small phosphatase 2                                             | CTDSP2  | 715956    |
| CTP synthase 2                                                      | CTPS2   | 721014    |
| C-type lectin domain family 12 member A                             | CLEC12A | 722319    |
| C-type lectin domain family 19 member A                             | CLEC19A | 694333    |
| C-type lectin domain family 3 member A                              | CLEC3A  | 713054    |
| C-type lectin domain family 6 member A                              | CLEC6A  | 716162    |
| C-type lectin domain family 9 member A                              | CLEC9A  | 717472    |
| CUB and zona pellucida-like domains 1                               | CUZD1   | 706861    |
| CUE domain containing 2                                             | CUEDC2  | 713243    |
| CUGBP, Elav-like family member 3                                    | CELF3   | 716884    |
| C-x(9)-C motif containing 4                                         | CMC4    | 100423504 |
| Cyclic nucleotide binding domain containing 2                       | CNBD2   | 703290    |
| Cyclic nucleotide gated channel alpha 1                             | CNGA1   | 704891    |
| Cyclin A1                                                           | CCNA1   | 693797    |
| Cyclin and CBS domain divalent metal cation<br>transport mediator 2 | CNNM2   | 714238    |
| Cyclin and CBS domain divalent metal cation<br>transport mediator 3 | CNNM3   | 710345    |
| Cyclin D binding myb-like transcription factor 1                    | DMTF1   | 706292    |
| Cyclin D3                                                           | CCND3   | 695215    |
| Cyclin Pas1/PHO80 domain containing 1                               | CNPPD1  | 704271    |
| Cyclin-dependent kinase 17                                          | CDK17   | 717183    |
| Cyclin-dependent kinase 4                                           | CDK4    | 715650    |
| Cyclin-dependent kinase 8                                           | CDK8    | 709761    |
| Cyclin-dependent kinase-like 1 (CDC2-related kinase)                | CDKL1   | 705975    |
| Cystatin 11                                                         | CST11   | 654419    |
| Cystatin 8                                                          | CST8    | 703172    |
| Cystatin C                                                          | CST3    | 574313    |
| Cystatin D                                                          | CST5    | 704408    |
| Cysteine and glycine rich protein 3                                 | CSRP3   | 702466    |
| Cysteine-serine-rich nuclear protein 2                              | CSRNP2  | 694549    |

|                                                        |          |           |
|--------------------------------------------------------|----------|-----------|
| Cysteine-serine-rich nuclear protein 3                 | CSRNP3   | 703526    |
| Cysteinyl leukotriene receptor 1                       | CYSLTR1  | 706663    |
| Cystinosin, lysosomal cystine transporter              | CTNS     | 706721    |
| Cytidine deaminase                                     | CDA      | 705913    |
| Cytochrome c oxidase subunit viib2                     | COX7B2   | 100428440 |
| Cytochrome P450, family 2, subfamily D, polypeptide 6  | CYP2D6   | 678691    |
| Cytochrome P450, family 2, subfamily E, polypeptide 1  | CYP2E1   | 678688    |
| Cytochrome P450, family 27, subfamily B, polypeptide 1 | CYP27B1  | 715747    |
| Cytochrome P450, family 4, subfamily F, polypeptide 22 | CYP4F22  | 718303    |
| Cytochrome P450, family 7, subfamily A, polypeptide 1  | CYP7A1   | 698127    |
| Cytochrome P450c17                                     | CYP17A1  | 678693    |
| Cytoplasmic polyadenylation element binding protein 1  | CPEB1    | 694357    |
| Cytotoxic and regulatory T-cell molecule               | CRTAM    | 707560    |
| Dab, reelin signal transducer, homolog 1 (Drosophila)  | DAB1     | 716200    |
| DAB2 interacting protein                               | DAB2IP   | 699080    |
| Dachshund family transcription factor 1                | DACH1    | 693532    |
| Dachsous cadherin-related 1                            | DCHS1    | 711938    |
| D-amino-acid oxidase                                   | DAO      | 706373    |
| DAZ associated protein 2                               | DAZAP2   | 695282    |
| DAZ interacting zinc finger protein 1-like             | DZIP1L   | 716551    |
| Dcmp deaminase                                         | DCTD     | 700995    |
| DC-STAMP domain containing 2                           | DCST2    | 717224    |
| DDB1 and CUL4 associated factor 10                     | DCAF10   | 716256    |
| DDB1 and CUL4 associated factor 11                     | DCAF11   | 714867    |
| DEAD (Asp-Glu-Ala-Asp) box helicase 25                 | DDX25    | 713920    |
| DEAD (Asp-Glu-Ala-Asp) box helicase 42                 | DDX42    | 717964    |
| DEAD (Asp-Glu-Ala-Asp) box polypeptide 19B             | DDX19B   | 709576    |
| DEAD (Asp-Glu-Ala-Asp) box polypeptide 4               | DDX4     | 706943    |
| DEAD (Asp-Glu-Ala-Asp) box polypeptide 41              | DDX41    | 700742    |
| DEAD (Asp-Glu-Ala-Asp) box polypeptide 50              | DDX50    | 712511    |
| DEAH (Asp-Glu-Ala-Asp/His) box polypeptide 57          | DHX57    | 713523    |
| DEAH (Asp-Glu-Ala-His) box polypeptide 38              | DHX38    | 709173    |
| DEAH (Asp-Glu-Ala-His) box polypeptide 40              | DHX40    | 715202    |
| Decapping mrna 1A                                      | DCP1A    | 694198    |
| Dedicator of cytokinesis 2                             | DOCK2    | 704061    |
| Dedicator of cytokinesis 5                             | DOCK5    | 711359    |
| Defensin alpha 6                                       | DEFA6    | 717000    |
| Defensin beta 108B                                     | DEFB108B | 696933    |
| Defensin beta 121                                      | DEFB121  | 619507    |
| Defensin beta 123                                      | DEFB123  | 619504    |
| Defensin beta 125                                      | DEFB125  | 714029    |
| Defensin beta 129                                      | DEFB129  | 714266    |
| Defensin, alpha 4, corticostatin                       | DEFA4    | 574311    |
| Dehydrogenase/reductase (SDR family) member 13         | DHRS13   | 710755    |
| Dehydrogenase/reductase (SDR family) member 3          | DHRS3    | 715548    |
| Deleted in lymphocytic leukemia, 7                     | DLEU7    | 707886    |
| Delta-like 4 (Drosophila)                              | DLL4     | 704898    |
| DENN/MADD domain containing 4A                         | DENND4A  | 709675    |

|                                                                  |         |           |
|------------------------------------------------------------------|---------|-----------|
| Denticleless E3 ubiquitin protein ligase homolog (Drosophila)    | DTL     | 711236    |
| Deoxycytidine kinase                                             | DCK     | 705040    |
| Deoxyhypusine synthase                                           | DHPS    | 716213    |
| Deoxyribonuclease I                                              | DNASE1  | 704119    |
| Desmoglein 1                                                     | DSG1    | 705452    |
| Developing brain homeobox 2                                      | DBX2    | 701170    |
| Dickkopf WNT signaling pathway inhibitor 4                       | DKK4    | 705011    |
| Dihydropyrimidine dehydrogenase                                  | DPYD    | 715672    |
| Dihydrouridine synthase 1-like                                   | DUS1L   | 715662    |
| Dipeptidase 3                                                    | DPEP3   | 701327    |
| Dipeptidyl-peptidase 10 (inactive)                               | DPP10   | 714671    |
| Discs, large (Drosophila) homolog-associated protein 4           | DLGAP4  | 702928    |
| Dishevelled segment polarity protein 2                           | DVL2    | 714381    |
| Distal-less homeobox 3                                           | DLX3    | 700831    |
| Distal-less homeobox 4                                           | DLX4    | 700706    |
| DMRT like family B with proline rich C-terminal 1                | DMRTB1  | 714424    |
| DMRT-like family C2                                              | DMRTC2  | 706178    |
| DNA damage inducible 1 homolog 1                                 | DDI1    | 704423    |
| DNA damage-induced apoptosis suppressor                          | DDIAS   | 701440    |
| DNA meiotic recombinase 1                                        | DMC1    | 700935    |
| Dnaj heat shock protein family (Hsp40) member B2                 | DNAJB2  | 702936    |
| Dnaj heat shock protein family (Hsp40) member B8                 | DNAJB8  | 705667    |
| Dnaj heat shock protein family (Hsp40) member C22                | DNAJC22 | 710205    |
| Dnaj heat shock protein family (Hsp40) member C27                | DNAJC27 | 694037    |
| Dnaj heat shock protein family (Hsp40) member C3                 | DNAJC3  | 695757    |
| Docking protein 5                                                | DOK5    | 698689    |
| Docking protein 6                                                | DOK6    | 703667    |
| Dopa decarboxylase                                               | DDC     | 693677    |
| Dopamine receptor D1                                             | DRD1    | 697796    |
| Dopamine receptor D3                                             | DRD3    | 100425048 |
| Dopamine receptor D5                                             | DRD5    | 712862    |
| Doublesex and mab-3 related transcription factor 1               | DMRT1   | 694516    |
| Doublesex and mab-3 related transcription factor 2               | DMRT2   | 697088    |
| Doublesex and mab-3 related transcription factor 3               | DMRT3   | 697323    |
| DR1-associated protein 1 (negative cofactor 2 alpha)             | DRAP1   | 715271    |
| Drosha, ribonuclease type III                                    | DROSHA  | 692081    |
| DTW domain containing 1                                          | DTWD1   | 715084    |
| DTW domain containing 2                                          | DTWD2   | 697989    |
| Dual oxidase maturation factor 2                                 | DUOXA2  | 712992    |
| Dual specificity phosphatase 21                                  | DUSP21  | 702770    |
| Dual specificity phosphatase 22                                  | DUSP22  | 705824    |
| Dual specificity phosphatase 9                                   | DUSP9   | 696161    |
| Dual specificity tyrosine-(Y)-phosphorylation regulated kinase 2 | DYRK2   | 717941    |
| Dynactin subunit 4                                               | DCTN4   | 712783    |
| Dynein, axonemal, heavy chain 5                                  | DNAH5   | 717339    |
| Dynein, axonemal, light intermediate chain 1                     | DNALI1  | 713912    |

|                                                                |         |        |
|----------------------------------------------------------------|---------|--------|
| Dysbindin (dystrobrevin binding protein 1) domain containing 1 | DBNDD1  | 701328 |
| Dyskeratosis congenita 1, dyskerin                             | DKC1    | 702563 |
| Dystroglycan 1                                                 | DAG1    | 706179 |
| Dystrophia myotonica protein kinase                            | DMPK    | 715328 |
| Dystrophin related protein 2                                   | DRP2    | 702655 |
| E1A binding protein p300                                       | EP300   | 706258 |
| E74-like factor 2 (ets domain transcription factor)            | ELF2    | 696760 |
| Ectodysplasin A receptor                                       | EDAR    | 695059 |
| Ecto-NOX disulfide-thiol exchanger 2                           | ENOX2   | 703816 |
| Ectonucleotide pyrophosphatase/phosphodiesterase 1             | ENPP1   | 710140 |
| EF-hand and coiled-coil domain containing 1                    | EFCC1   | 706444 |
| EF-hand calcium binding domain 1                               | EFCAB1  | 708842 |
| EGF-like repeats and discoidin I-like domains 3                | EDIL3   | 693315 |
| EGF-like-domain, multiple 7                                    | EGFL7   | 709840 |
| EGF-like-domain, multiple 8                                    | EGFL8   | 717145 |
| EH domain containing 3                                         | EHD3    | 705316 |
| ELAV like neuron-specific RNA binding protein 2                | ELAVL2  | 708195 |
| ELAV like neuron-specific RNA binding protein 4                | ELAVL4  | 711231 |
| ELK1, member of ETS oncogene family                            | ELK1    | 712610 |
| ELK4, ETS-domain protein (SRF accessory protein 1)             | ELK4    | 699281 |
| ELKS/RAB6-interacting/CAST family member 2                     | ERC2    | 705338 |
| ELOVL fatty acid elongase 4                                    | ELOVL4  | 692070 |
| Endonuclease domain containing 1                               | ENDOD1  | 699210 |
| Endoplasmic reticulum to nucleus signaling 1                   | ERN1    | 717751 |
| Endothelial cell adhesion molecule                             | ESAM    | 712200 |
| Endothelin 2                                                   | EDN2    | 695960 |
| Enhancer of mrna decapping 3                                   | EDC3    | 709182 |
| Enhancer of polycomb homolog 2 (Drosophila)                    | EPC2    | 721916 |
| Enhancer of rudimentary homolog (Drosophila)                   | ERH     | 712507 |
| ENTH domain containing 1                                       | ENTHD1  | 704302 |
| Eomesodermin                                                   | EOMES   | 704711 |
| Eosinophil peroxidase                                          | EPX     | 709655 |
| EPH receptor A5                                                | EPHA5   | 712074 |
| EPH receptor B6                                                | EPHB6   | 704886 |
| Ephrin-B1                                                      | EFNB1   | 694149 |
| Epididymal sperm binding protein 1                             | ELSPBP1 | 718468 |
| Epiphykan                                                      | EPYC    | 709645 |
| ER degradation enhancer, mannosidase alpha-like 3              | EDEM3   | 714475 |
| ERGIC and golgi 3                                              | ERGIC3  | 704736 |
| Espin-like                                                     | ESPNL   | 695742 |
| Estrogen receptor 2 (ER beta)                                  | ESR2    | 574110 |
| Ethylmalonic encephalopathy 1                                  | ETHE1   | 718089 |
| Eukaryotic translation elongation factor 1 beta 2              | EEF1B2  | 707019 |
| Eukaryotic translation elongation factor 1 gamma               | EEF1G   | 722274 |
| Eukaryotic translation initiation factor 2B subunit epsilon    | EIF2B5  | 703673 |
| Eukaryotic translation initiation factor 2B subunit gamma      | EIF2B3  | 705862 |
| Eukaryotic translation initiation factor 3 subunit F           | EIF3F   | 706269 |



|                                                                            |           |        |
|----------------------------------------------------------------------------|-----------|--------|
| Eukaryotic translation initiation factor 3 subunit L                       | EIF3L     | 699189 |
| Eukaryotic translation initiation factor 4E family member 3                | EIF4E3    | 696303 |
| Eukaryotic translation initiation factor 4E nuclear import factor 1        | EIF4ENIF1 | 716871 |
| Eukaryotic translation initiation factor 4H                                | EIF4H     | 693429 |
| Even-skipped homeobox 1                                                    | EVX1      | 699106 |
| EWS RNA binding protein 1                                                  | EWSR1     | 714432 |
| Excision repair cross-complementation group 6 like                         | ERCC6L    | 699138 |
| Exocyst complex component 2                                                | EXOC2     | 706296 |
| Exocyst complex component 3-like 2                                         | EXOC3L2   | 713992 |
| Exonuclease 3'-5' domain containing 1                                      | EXD1      | 705364 |
| Exosome component 8                                                        | EXOSC8    | 695071 |
| Exostosin glycosyltransferase 1                                            | EXT1      | 701488 |
| EYA transcriptional coactivator and phosphatase 2                          | EYA2      | 716182 |
| EYA transcriptional coactivator and phosphatase 3                          | EYA3      | 716724 |
| FAD-dependent oxidoreductase domain containing 1                           | FOXRED1   | 714271 |
| Family with sequence similarity 109 member B                               | FAM109B   | 709545 |
| Family with sequence similarity 120C                                       | FAM120C   | 700888 |
| Family with sequence similarity 122A                                       | FAM122A   | 698955 |
| Family with sequence similarity 126 member A                               | FAM126A   | 705467 |
| Family with sequence similarity 127, member A                              | FAM127A   | 708766 |
| Family with sequence similarity 129 member A                               | FAM129A   | 714427 |
| Family with sequence similarity 134 member A                               | FAM134A   | 704378 |
| Family with sequence similarity 151 member A                               | FAM151A   | 715361 |
| Family with sequence similarity 166 member A                               | FAM166A   | 705446 |
| Family with sequence similarity 178 member B                               | FAM178B   | 710890 |
| Family with sequence similarity 181 member B                               | FAM181B   | 701184 |
| Family with sequence similarity 186 member B                               | FAM186B   | 711001 |
| Family with sequence similarity 187, member B                              | FAM187B   | 707890 |
| Family with sequence similarity 19 (chemokine (C-C motif)-like), member A3 | FAM19A3   | 706250 |
| Family with sequence similarity 206 member A                               | FAM206A   | 710486 |
| Family with sequence similarity 210 member B                               | FAM210B   | 698314 |
| Family with sequence similarity 234 member A                               | FAM234A   | 694729 |
| Family with sequence similarity 26 member F                                | FAM26F    | 715967 |
| Family with sequence similarity 3 member A                                 | FAM3A     | 701159 |
| Family with sequence similarity 43 member B                                | FAM43B    | 705659 |
| Family with sequence similarity 53 member C                                | FAM53C    | 714176 |
| Family with sequence similarity 65 member B                                | FAM65B    | 715354 |
| Family with sequence similarity 69 member A                                | FAM69A    | 706803 |
| Family with sequence similarity 71 member A                                | FAM71A    | 710735 |
| Family with sequence similarity 71 member B                                | FAM71B    | 715428 |
| Family with sequence similarity 71 member C                                | FAM71C    | 694296 |
| Family with sequence similarity 71 member F1                               | FAM71F1   | 699608 |
| Family with sequence similarity 83 member A                                | FAM83A    | 704023 |
| Family with sequence similarity 83 member F                                | FAM83F    | 704523 |
| Family with sequence similarity 89 member B                                | FAM89B    | 721925 |
| FANCD2 opposite strand                                                     | FANCD2OS  | 715980 |

|                                                                         |         |        |
|-------------------------------------------------------------------------|---------|--------|
| Fanconi anemia complementation group B                                  | FANCB   | 712083 |
| Fanconi anemia complementation group G                                  | FANCG   | 698837 |
| Fanconi anemia complementation group I                                  | FANCI   | 699878 |
| Fanconi anemia core complex associated protein 100                      | FAAP100 | 713876 |
| Far upstream element (FUSE) binding protein 3                           | FUBP3   | 722470 |
| Fascin actin-bundling protein 2, retinal                                | FSCN2   | 713824 |
| FAST kinase domains 1                                                   | FASTKD1 | 706154 |
| Fatty acid binding protein 1, liver                                     | FABP1   | 699776 |
| FBJ murine osteosarcoma viral oncogene homolog                          | FOS     | 702077 |
| F-box and leucine-rich repeat protein 6                                 | FBXL6   | 701594 |
| F-box protein 39                                                        | FBXO39  | 713494 |
| F-box protein 40                                                        | FBXO40  | 713933 |
| F-box protein 44                                                        | FBXO44  | 714585 |
| F-box protein 47                                                        | FBXO47  | 695069 |
| F-box protein 6                                                         | FBXO6   | 722740 |
| F-box protein 7                                                         | FBXO7   | 717317 |
| Fc fragment of ige, high affinity I, receptor for;<br>alpha polypeptide | FCER1A  | 719324 |
| Fc fragment of igg, low affinity iib, receptor (CD32)                   | FCGR2B  | 720009 |
| Fc fragment of igg, receptor, transporter, alpha                        | FCGRT   | 718859 |
| Fc receptor-like 1                                                      | FCRL1   | 718841 |
| Fc receptor-like B                                                      | FCRLB   | 720028 |
| FCF1 rna-processing protein                                             | FCF1    | 700044 |
| Feline leukemia virus subgroup C cellular receptor 1                    | FLVCR1  | 710008 |
| Fem-1 homolog b (C. Elegans)                                            | FEM1B   | 693955 |
| FERM and PDZ domain containing 1                                        | FRMPD1  | 716380 |
| FERM domain containing 5                                                | FRMD5   | 711670 |
| FERM domain containing 7                                                | FRMD7   | 705736 |
| Fermitin family member 3                                                | FERMT3  | 722120 |
| Ferritin mitochondrial                                                  | FTMT    | 699743 |
| Ferritin, heavy polypeptide-like 17                                     | FTHL17  | 707851 |
| Fetuin B                                                                | FETUB   | 699226 |
| FEV (ETS oncogene family)                                               | FEV     | 701065 |
| Fibrinogen beta chain                                                   | FGB     | 698487 |
| Fibrinogen gamma chain                                                  | FGG     | 698363 |
| Fibrinogen-like 2                                                       | FGL2    | 694856 |
| Fibroblast growth factor 1 (acidic)                                     | FGF1    | 705970 |
| Fibroblast growth factor 10                                             | FGF10   | 701584 |
| Fibroblast growth factor 16                                             | FGF16   | 705612 |
| Fibroblast growth factor 20                                             | FGF20   | 701847 |
| Fibroblast growth factor 3                                              | FGF3    | 708918 |
| Fibroblast growth factor 4                                              | FGF4    | 709016 |
| Fibroblast growth factor 6                                              | FGF6    | 710739 |
| Fibroblast growth factor receptor 1                                     | FGFR1   | 700126 |
| Fibronectin leucine rich transmembrane protein 1                        | FLRT1   | 717942 |
| Fibronectin type III and SPRY domain containing 2                       | FSD2    | 693575 |
| Fibrous sheath CABYR binding protein                                    | FSCB    | 701592 |
| FIC domain containing                                                   | FICD    | 706780 |

|                                                     |        |        |
|-----------------------------------------------------|--------|--------|
| Ficolin 1                                           | FCN1   | 712405 |
| Ficolin 2                                           | FCN2   | 712486 |
| Filamin A, alpha                                    | FLNA   | 699524 |
| Filamin binding LIM protein 1                       | FBLIM1 | 695727 |
| Fizzy/cell division cycle 20 related 1              | FZR1   | 721711 |
| FK506 binding protein 10                            | FKBP10 | 707881 |
| FK506 binding protein 7                             | FKBP7  | 703299 |
| FK506 binding protein 8                             | FKBP8  | 720232 |
| Flavin containing monooxygenase 1                   | FMO1   | 703743 |
| Flavin containing monooxygenase 3                   | FMO3   | 574244 |
| Folate receptor 2 (fetal)                           | FOLR2  | 718405 |
| Follicle stimulating hormone receptor               | FSHR   | 716123 |
| Follicle stimulating hormone, beta polypeptide      | FSHB   | 697317 |
| Follicular dendritic cell secreted protein          | FDCSP  | 707784 |
| Folliculogenesis specific bhlh transcription factor | FIGLA  | 710606 |
| Follistatin like 1                                  | FSTL1  | 713367 |
| Forkhead box A1                                     | FOXA1  | 697909 |
| Forkhead box R2                                     | FOXR2  | 704032 |
| Four and a half LIM domains 3                       | FHL3   | 715313 |
| Free fatty acid receptor 1                          | FFAR1  | 708620 |
| Frizzled class receptor 3                           | FZD3   | 713839 |
| Frizzled-related protein                            | FRZB   | 706048 |
| Fucokinase                                          | FUK    | 709226 |
| Fucosidase, alpha-L- 2, plasma                      | FUCA2  | 700611 |
| Fuzzy planar cell polarity protein                  | FUZ    | 719442 |
| FXYP domain containing ion transport regulator 7    | FXYP7  | 718457 |
| FYN proto-oncogene, Src family tyrosine kinase      | FYN    | 574214 |
| FYVE, rhogef and PH domain containing 6             | FGD6   | 712132 |
| G protein pathway suppressor 1                      | GPS1   | 719343 |
| G protein-coupled bile acid receptor 1              | GPBAR1 | 697937 |
| G protein-coupled receptor 1                        | GPR1   | 707120 |
| G protein-coupled receptor 119                      | GPR119 | 703368 |
| G protein-coupled receptor 12                       | GPR12  | 710030 |
| G protein-coupled receptor 137                      | GPR137 | 717722 |
| G protein-coupled receptor 139                      | GPR139 | 695541 |
| G protein-coupled receptor 141                      | GPR141 | 705700 |
| G protein-coupled receptor 153                      | GPR153 | 703169 |
| G protein-coupled receptor 158                      | GPR158 | 707065 |
| G protein-coupled receptor 17                       | GPR17  | 699576 |
| G protein-coupled receptor 171                      | GPR171 | 709960 |
| G protein-coupled receptor 174                      | GPR174 | 707800 |
| G protein-coupled receptor 176                      | GPR176 | 701115 |
| G protein-coupled receptor 179                      | GPR179 | 693410 |
| G protein-coupled receptor 18                       | GPR18  | 698714 |
| G protein-coupled receptor 182                      | GPR182 | 713866 |
| G protein-coupled receptor 183                      | GPR183 | 698844 |
| G protein-coupled receptor 19                       | GPR19  | 697072 |
| G protein-coupled receptor 20                       | GPR20  | 693582 |

|                                                                 |         |           |
|-----------------------------------------------------------------|---------|-----------|
| G protein-coupled receptor 22                                   | GPR22   | 699492    |
| G protein-coupled receptor 25                                   | GPR25   | 709001    |
| G protein-coupled receptor 26                                   | GPR26   | 693327    |
| G protein-coupled receptor 31                                   | GPR31   | 717158    |
| G protein-coupled receptor 34                                   | GPR34   | 700887    |
| G protein-coupled receptor 35                                   | GPR35   | 699073    |
| G protein-coupled receptor 37 (endothelin receptor type B-like) | GPR37   | 696628    |
| G protein-coupled receptor 50                                   | GPR50   | 703817    |
| G protein-coupled receptor 61                                   | GPR61   | 699055    |
| G protein-coupled receptor 63                                   | GPR63   | 704888    |
| G protein-coupled receptor 65                                   | GPR65   | 693449    |
| G protein-coupled receptor 68                                   | GPR68   | 696529    |
| G protein-coupled receptor 75                                   | GPR75   | 100426872 |
| G protein-coupled receptor 78                                   | GPR78   | 708831    |
| G protein-coupled receptor 84                                   | GPR84   | 705309    |
| G protein-coupled receptor 85                                   | GPR85   | 703214    |
| G protein-coupled receptor kinase 7                             | GRK7    | 714916    |
| G protein-coupled receptor, class C, group 5, member B          | GPRC5B  | 695204    |
| G protein-coupled receptor, class C, group 5, member D          | GPRC5D  | 698898    |
| G protein-coupled receptor, class C, group 6, member A          | GPRC6A  | 715520    |
| G2/M-phase specific E3 ubiquitin protein ligase                 | G2E3    | 717021    |
| Galactokinase 2                                                 | GALK2   | 714866    |
| Galactose-3-O-sulfotransferase 1                                | GAL3ST1 | 715998    |
| Galanin like peptide                                            | GALP    | 704323    |
| Gametogenetin                                                   | GGN     | 715072    |
| Gamma-aminobutyric acid (GABA) A receptor, alpha 2              | GABRA2  | 703894    |
| Gamma-aminobutyric acid (GABA) A receptor, alpha 3              | GABRA3  | 711230    |
| Gamma-aminobutyric acid (GABA) A receptor, alpha 6              | GABRA6  | 697010    |
| Gamma-aminobutyric acid (GABA) A receptor, beta 2               | GABRB2  | 696767    |
| Gamma-aminobutyric acid (GABA) A receptor, gamma 2              | GABRG2  | 697248    |
| Gamma-aminobutyric acid (GABA) A receptor, rho 1                | GABRR1  | 700728    |
| Gamma-aminobutyric acid (GABA) B receptor, 1                    | GABBR1  | 708987    |
| Gamma-glutamylcyclotransferase                                  | GGCT    | 695547    |
| Gamma-glutamyltransferase 5                                     | GGT5    | 720345    |
| Gap junction protein alpha 10                                   | GJA10   | 704282    |
| Gap junction protein alpha 8                                    | GJA8    | 701415    |
| Gap junction protein beta 7                                     | GJB7    | 100424944 |
| Gap junction protein delta 2                                    | GJD2    | 697250    |
| Gap junction protein delta 3                                    | GJD3    | 700473    |
| Gap junction protein delta 4                                    | GJD4    | 699010    |
| Gastric inhibitory polypeptide                                  | GIP     | 698335    |
| Gastric intrinsic factor                                        | GIF     | 698704    |
| Gastrin                                                         | GAST    | 707564    |
| Gastrokin 2                                                     | GKN2    | 700323    |
| Gastrulation brain homeobox 2                                   | GBX2    | 693901    |
| GEM interacting protein                                         | GMIP    | 720380    |
| Gem nuclear organelle associated protein 8                      | GEMIN8  | 720922    |

|                                                                                               |         |           |
|-----------------------------------------------------------------------------------------------|---------|-----------|
| General transcription factor IIH subunit 4                                                    | GTF2H4  | 714285    |
| General transcription factor IIH subunit 5                                                    | GTF2H5  | 700107    |
| Germinal center-associated, signaling and motility                                            | GCSAM   | 707891    |
| Ghrelin/obestatin prepropeptide                                                               | GHRL    | 574280    |
| Gigaxonin                                                                                     | GAN     | 713996    |
| GLE1, RNA export mediator                                                                     | GLE1    | 717474    |
| GLI pathogenesis-related 1                                                                    | GLIPR1  | 718956    |
| Glial cell derived neurotrophic factor                                                        | GDNF    | 706345    |
| Glial cells missing homolog 2 (Drosophila)                                                    | GCM2    | 698614    |
| Glucagon-like peptide 2 receptor                                                              | GLP2R   | 717783    |
| Glucose 6 phosphatase, catalytic, 3                                                           | G6PC3   | 714276    |
| Glucose-6-phosphate dehydrogenase                                                             | G6PD    | 701137    |
| Glucose-fructose oxidoreductase domain containing 1                                           | GFOD1   | 700607    |
| Glucosidase, beta (bile acid) 2                                                               | GBA2    | 696062    |
| Glutamate decarboxylase 2                                                                     | GAD2    | 613029    |
| Glutamate receptor, ionotropic, AMPA 4                                                        | GRIA4   | 705794    |
| Glutamate receptor, ionotropic, kainate 1                                                     | GRIK1   | 705699    |
| Glutamate receptor, ionotropic, N-methyl D-aspartate 2B                                       | GRIN2B  | 698571    |
| Glutamate receptor, ionotropic, N-methyl D-aspartate 2C                                       | GRIN2C  | 699216    |
| Glutamate receptor, ionotropic, N-methyl D-aspartate-associated protein 1 (glutamate binding) | GRINA   | 708234    |
| Glutamate receptor, metabotropic 2                                                            | GRM2    | 700214    |
| Glutamate receptor, metabotropic 3                                                            | GRM3    | 706645    |
| Glutamate receptor, metabotropic 8                                                            | GRM8    | 697465    |
| Glutaminase                                                                                   | GLS     | 693520    |
| Glutathione peroxidase 5                                                                      | GPX5    | 708014    |
| Glutathione peroxidase 6                                                                      | GPX6    | 100286832 |
| Glutathione S-transferase alpha 4                                                             | GSTA4   | 709666    |
| Glutathione S-transferase kappa 1                                                             | GSTK1   | 704240    |
| Glutathione S-transferase pi 1                                                                | GSTP1   | 721704    |
| Glyceraldehyde-3-phosphate dehydrogenase                                                      | GAPDH   | 574353    |
| Glycerol-3-phosphate acyltransferase 2, mitochondrial                                         | GPAT2   | 707076    |
| Glycine receptor alpha 1                                                                      | GLRA1   | 713940    |
| Glycine receptor alpha 2                                                                      | GLRA2   | 711926    |
| Glycine receptor alpha 3                                                                      | GLRA3   | 697984    |
| Glycogen synthase 2                                                                           | GYS2    | 706152    |
| Glycosylated lysosomal membrane protein                                                       | GLMP    | 719468    |
| Glycosylphosphatidylinositol anchored molecule like                                           | GML     | 705046    |
| Glycosyltransferase-like 1B                                                                   | GYLTL1B | 714846    |
| Golgi-associated, gamma adaptin ear containing, ARF binding protein 1                         | GGA1    | 697929    |
| Golgi-associated, gamma adaptin ear containing, ARF binding protein 3                         | GGA3    | 705751    |
| Goosecoid homeobox                                                                            | GSC     | 702308    |
| Goosecoid homeobox 2                                                                          | GSC2    | 719051    |
| G-protein signaling modulator 1                                                               | GPSM1   | 710652    |
| Granzyme K                                                                                    | GZMK    | 705477    |
| GRB2-related adaptor protein                                                                  | GRAP    | 702473    |

|                                                                              |          |           |
|------------------------------------------------------------------------------|----------|-----------|
| GRB2-related adaptor protein 2                                               | GRAP2    | 704410    |
| G-rich RNA sequence binding factor 1                                         | GRSF1    | 706301    |
| GRIP and coiled-coil domain containing 1                                     | GCC1     | 697975    |
| Group-specific component (vitamin D binding protein)                         | GC       | 705708    |
| Growth arrest and DNA damage inducible alpha                                 | GADD45A  | 701054    |
| Growth associated protein 43                                                 | GAP43    | 711260    |
| Growth differentiation factor 10                                             | GDF10    | 711441    |
| Growth differentiation factor 3                                              | GDF3     | 715605    |
| Growth differentiation factor 6                                              | GDF6     | 701126    |
| Growth factor independent 1B transcription repressor                         | GFI1B    | 714593    |
| Growth hormone 1                                                             | GH1      | 718156    |
| Growth hormone inducible transmembrane protein                               | GHITM    | 702691    |
| Gse1 coiled-coil protein                                                     | GSE1     | 693298    |
| Gtpase, IMAP family member 1                                                 | GIMAP1   | 100424488 |
| Gtpase, IMAP family member 4                                                 | GIMAP4   | 713506    |
| Guanidinoacetate N-methyltransferase                                         | GAMT     | 721263    |
| Guanine nucleotide binding protein (G protein),<br>beta polypeptide 1        | GNB1     | 703399    |
| Guanine nucleotide binding protein (G protein),<br>beta polypeptide 2-like 1 | GNB2L1   | 708526    |
| Guanylate cyclase 2C                                                         | GUCY2C   | 699191    |
| Guanylate cyclase 2F, retinal                                                | GUCY2F   | 704485    |
| Guanylate cyclase activator 1B                                               | GUCA1B   | 695658    |
| Guanylate cyclase activator 1C                                               | GUCA1C   | 706071    |
| Guanylate kinase 1                                                           | GUK1     | 695272    |
| H2A histone family, member Y                                                 | H2AFY    | 711836    |
| H2A histone family, member Z                                                 | H2AFZ    | 709326    |
| HAUS augmin like complex subunit 8                                           | HAUS8    | 718874    |
| Heart and neural crest derivatives expressed 1                               | HAND1    | 714450    |
| Heat shock factor binding protein 1                                          | HSBP1    | 714498    |
| Heat shock protein 90kda alpha family class B member 1                       | HSP90AB1 | 702293    |
| Heat shock protein family B (small) member 11                                | HSPB11   | 714791    |
| Heat shock transcription factor 2                                            | HSF2     | 713938    |
| HECT domain containing E3 ubiquitin protein ligase 2                         | HECTD2   | 697258    |
| HECT, C2 and WW domain containing E3 ubiquitin<br>protein ligase 1           | HECW1    | 701331    |
| Hematological and neurological expressed 1-like                              | HN1L     | 702283    |
| Hematopoietic cell-specific Lyn substrate 1                                  | HCLS1    | 714044    |
| Hematopoietic prostaglandin D synthase                                       | HPGDS    | 705227    |
| Heme oxygenase 1                                                             | HMOX1    | 719266    |
| Heme oxygenase 2                                                             | HMOX2    | 705461    |
| Hemogen                                                                      | HEMGN    | 715562    |
| Hemoglobin subunit alpha 1                                                   | HBA1     | 701930    |
| Hemoglobin subunit epsilon 1                                                 | HBE1     | 715414    |
| HEN1 methyltransferase homolog 1 (Arabidopsis)                               | HENMT1   | 698896    |
| HEPACAM family member 2                                                      | HEPACAM2 | 702110    |
| Heparan sulfate-glucosamine 3-sulfotransferase 2                             | HS3ST2   | 699722    |
| Heparan sulfate-glucosamine 3-sulfotransferase 3A1                           | HS3ST3A1 | 718232    |

|                                                                                                                   |           |           |
|-------------------------------------------------------------------------------------------------------------------|-----------|-----------|
| Heparan sulfate-glucosamine 3-sulfotransferase 5                                                                  | HS3ST5    | 693684    |
| Hepatocyte nuclear factor 4, alpha                                                                                | HNF4A     | 717972    |
| Hepcidin antimicrobial peptide                                                                                    | HAMP      | 708397    |
| Hexamethylene bis-acetamide inducible 1                                                                           | HEXIM1    | 716006    |
| Hexokinase 3 (white cell)                                                                                         | HK3       | 698120    |
| High mobility group box 3                                                                                         | HMGB3     | 703598    |
| High mobility group box 4                                                                                         | HMGB4     | 710554    |
| Histamine receptor H2                                                                                             | HRH2      | 695226    |
| Histamine receptor H3                                                                                             | HRH3      | 574253    |
| Histocompatibility (minor) 13                                                                                     | HM13      | 713216    |
| Histone cluster 1, h1b                                                                                            | HIST1H1B  | 705100    |
| Histone cluster 1, h1t                                                                                            | HIST1H1T  | 696375    |
| Histone cluster 1, h2bm                                                                                           | HIST1H2BM | 704452    |
| Histone cluster 2, h2ab                                                                                           | HIST2H2AB | 705170    |
| Histone cluster 3, H3                                                                                             | HIST3H3   | 694024    |
| Histone deacetylase 11                                                                                            | HDAC11    | 693537    |
| Histone deacetylase 3                                                                                             | HDAC3     | 704467    |
| Histone deacetylase 5                                                                                             | HDAC5     | 711456    |
| Homeobox A6                                                                                                       | HOXA6     | 700102    |
| Homeobox B1                                                                                                       | HOXB1     | 696111    |
| Homeobox B7                                                                                                       | HOXB7     | 697089    |
| Homeobox C12                                                                                                      | HOXC12    | 704201    |
| Homeobox C13                                                                                                      | HOXC13    | 704082    |
| Homeobox C4                                                                                                       | HOXC4     | 100430432 |
| Homeobox D12                                                                                                      | HOXD12    | 100428776 |
| Homeodomain interacting protein kinase 1                                                                          | HIPK1     | 707856    |
| Host cell factor C2                                                                                               | HCFC2     | 700316    |
| HRAS like suppressor family member 5                                                                              | HRASLS5   | 718317    |
| Htra serine peptidase 3                                                                                           | HTRA3     | 722638    |
| Human immunodeficiency virus type I enhancer binding protein 3                                                    | HIVEP3    | 696084    |
| HUS1 checkpoint clamp component B                                                                                 | HUS1B     | 706408    |
| Hyaluronan and proteoglycan link protein 1                                                                        | HAPLN1    | 712501    |
| Hyaluronan and proteoglycan link protein 3                                                                        | HAPLN3    | 698880    |
| Hydroxyacid oxidase (glycolate oxidase) 1                                                                         | HAO1      | 718360    |
| Hydroxyacyl-coa dehydrogenase/3-ketoacyl-coa t hiolase/enoyl-coa hydratase (trifunctional protein), alpha subunit | HADHA     | 695975    |
| Hydroxysteroid (17-beta) dehydrogenase 3                                                                          | HSD17B3   | 709843    |
| Hydroxysteroid dehydrogenase like 2                                                                               | HSDL2     | 707233    |
| Hyperpolarization activated cyclic nucleotide gated potassium channel 3                                           | HCN3      | 717719    |
| Hypocretin (orexin) receptor 2                                                                                    | HCRT2     | 711662    |
| Iduronidase, alpha-L-                                                                                             | IDUA      | 106998224 |
| IKAROS family zinc finger 1                                                                                       | IKZF1     | 693936    |
| IKAROS family zinc finger 3                                                                                       | IKZF3     | 698083    |
| IKAROS family zinc finger 5                                                                                       | IKZF5     | 716950    |
| IL2-inducible T-cell kinase                                                                                       | ITK       | 715471    |

|                                                                    |         |           |
|--------------------------------------------------------------------|---------|-----------|
| Immunity-related gtpase family, Q                                  | IRGQ    | 710309    |
| Immunoglobulin superfamily member 21                               | IGSF21  | 701539    |
| Immunoglobulin superfamily member 8                                | IGSF8   | 720186    |
| IMP (inosine 5'-monophosphate) dehydrogenase 2                     | IMPDH2  | 708307    |
| IMP3, U3 small nucleolar ribonucleoprotein                         | IMP3    | 706202    |
| Importin 13                                                        | IPO13   | 702007    |
| Importin 5                                                         | IPO5    | 697448    |
| Importin 9                                                         | IPO9    | 707210    |
| Inducible T-cell co-stimulator                                     | ICOS    | 705788    |
| Inhibin alpha                                                      | INHA    | 574379    |
| Inhibin beta C                                                     | INHBC   | 714640    |
| Inositol polyphosphate multikinase                                 | IPMK    | 703630    |
| Inositol polyphosphate-4-phosphatase type I A                      | INPP4A  | 707986    |
| Inositol polyphosphate-4-phosphatase type II B                     | INPP4B  | 699738    |
| Inositol polyphosphate-5-phosphatase F                             | INPP5F  | 703808    |
| Inositol-3-phosphate synthase 1                                    | ISYNA1  | 719487    |
| Insulin like 3                                                     | INSL3   | 100533192 |
| Insulin like 4                                                     | INSL4   | 693911    |
| Insulin like 5                                                     | INSL5   | 699803    |
| Insulin like 6                                                     | INSL6   | 693735    |
| Insulin like growth factor binding protein 4                       | IGFBP4  | 700963    |
| Insulin like growth factor binding protein acid labile subunit     | IGFALS  | 722493    |
| Insulinoma-associated 2                                            | INSM2   | 695563    |
| Integral membrane protein 2B                                       | ITM2B   | 709896    |
| Integrator complex subunit 5                                       | INTS5   | 719124    |
| Integrator complex subunit 7                                       | INTS7   | 711152    |
| Integrin linked kinase                                             | ILK     | 709944    |
| Integrin subunit alpha 2b                                          | ITGA2B  | 714955    |
| Integrin subunit alpha 4                                           | ITGA4   | 704745    |
| Integrin subunit alpha V                                           | ITGAV   | 707756    |
| Integrin subunit beta 6                                            | ITGB6   | 700454    |
| Integrin subunit beta 7                                            | ITGB7   | 699405    |
| Integrin subunit beta like 1                                       | ITGBL1  | 700965    |
| Integrin-binding sialoprotein                                      | IBSP    | 701835    |
| Intelectin 1 (galactofuranose binding)                             | ITLN1   | 719807    |
| Interactor of little elongation complex ELL subunit 2              | ICE2    | 706347    |
| Inter-alpha-trypsin inhibitor heavy chain 2                        | ITIH2   | 713575    |
| Intercellular adhesion molecule 4 (Landsteiner-Wiener blood group) | ICAM4   | 712354    |
| Interferon (alpha, beta and omega) receptor 2                      | IFNAR2  | 699726    |
| Interferon regulatory factor 2                                     | IRF2    | 694347    |
| Interferon regulatory factor 2 binding protein 1                   | IRF2BP1 | 715611    |
| Interferon regulatory factor 5                                     | IRF5    | 700725    |
| Interferon, alpha 2                                                | IFNA2   | 709948    |
| Interferon, gamma                                                  | IFNG    | 574282    |
| Interferon, gamma-inducible protein 16                             | IFI16   | 719253    |
| Interferon, kappa                                                  | IFNK    | 707234    |
| Interferon, lambda receptor 1                                      | IFNLR1  | 711625    |



|                                                         |         |           |
|---------------------------------------------------------|---------|-----------|
| Interleukin 17 receptor B                               | IL17RB  | 693671    |
| Interleukin 18 receptor accessory protein               | IL18RAP | 712046    |
| Interleukin 19                                          | IL19    | 694806    |
| Interleukin 20 receptor subunit beta                    | IL20RB  | 716769    |
| Interleukin 21                                          | IL21    | 708125    |
| Interleukin 21 receptor                                 | IL21R   | 705759    |
| Interleukin 22                                          | IL22    | 718047    |
| Interleukin 4                                           | IL4     | 574281    |
| Interphotoreceptor matrix proteoglycan 1                | IMPG1   | 716669    |
| Interphotoreceptor matrix proteoglycan 2                | IMPG2   | 701319    |
| Intraflagellar transport 172                            | IFT172  | 700948    |
| Intraflagellar transport 20                             | IFT20   | 715773    |
| Intraflagellar transport 57                             | IFT57   | 705088    |
| Inturned planar cell polarity protein                   | INTU    | 709967    |
| IQ motif containing K                                   | IQCK    | 695417    |
| IQ motif containing with AAA domain 1                   | IQCA1   | 694173    |
| Iroquois homeobox 1                                     | IRX1    | 693825    |
| Iroquois homeobox 2                                     | IRX2    | 695599    |
| Iroquois homeobox 4                                     | IRX4    | 710675    |
| Iroquois homeobox 5                                     | IRX5    | 697968    |
| ISL LIM homeobox 2                                      | ISL2    | 707916    |
| Isocitrate dehydrogenase 3 (NAD+) gamma                 | IDH3G   | 698558    |
| Izumo sperm-egg fusion 1                                | IZUMO1  | 718234    |
| Junction adhesion molecule like                         | JAML    | 704919    |
| Junctophilin 1                                          | JPH1    | 697014    |
| Kallikrein B1                                           | KLKB1   | 696639    |
| Kallikrein related peptidase 5                          | KLK5    | 719467    |
| Kallikrein related peptidase 8                          | KLK8    | 719488    |
| KDEL endoplasmic reticulum protein retention receptor 1 | KDELR1  | 717928    |
| KDEL endoplasmic reticulum protein retention receptor 2 | KDELR2  | 704335    |
| KDEL motif containing 1                                 | KDELC1  | 702156    |
| Kelch domain containing 10                              | KLHDC10 | 702290    |
| Kelch domain containing 8B                              | KLHDC8B | 707348    |
| Kelch like family member 11                             | KLHL11  | 708393    |
| Kelch like family member 2                              | KLHL2   | 704790    |
| Kelch like family member 21                             | KLHL21  | 704734    |
| Kelch like family member 26                             | KLHL26  | 719583    |
| Kelch like family member 32                             | KLHL32  | 709276    |
| Kelch like family member 34                             | KLHL34  | 696156    |
| Kelch like family member 40                             | KLHL40  | 717366    |
| Kell blood group, metallo-endoropeptidase               | KEL     | 703492    |
| Keratin 13, type I                                      | KRT13   | 706830    |
| Keratin 14, type I                                      | KRT14   | 100426176 |
| Keratin 17, type I                                      | KRT17   | 100426328 |
| Keratin 222, type II                                    | KRT222  | 701557    |
| Keratin 25, type I                                      | KRT25   | 701915    |
| Keratin 28, type I                                      | KRT28   | 702274    |
| Keratin 39, type I                                      | KRT39   | 702838    |

|                                                           |           |           |
|-----------------------------------------------------------|-----------|-----------|
| Keratin 4, type II                                        | KRT4      | 700060    |
| Keratin 71, type II                                       | KRT71     | 698941    |
| Keratin 74, type II                                       | KRT74     | 699069    |
| Keratin 76, type II                                       | KRT76     | 699194    |
| Keratin 79, type II                                       | KRT79     | 700188    |
| Keratin associated protein 12-4                           | KRTAP12-4 | 712284    |
| Keratin associated protein 22-1                           | KRTAP22-1 | 100428224 |
| Keratin associated protein 3-1                            | KRTAP3-1  | 697574    |
| Keratin associated protein 8-1                            | KRTAP8-1  | 711461    |
| Keratocan                                                 | KERA      | 709743    |
| KIAA0141 ortholog                                         | KIAA0141  | 702802    |
| KIAA0355 ortholog                                         | KIAA0355  | 705202    |
| KIAA1033 ortholog                                         | KIAA1033  | 701501    |
| KIAA1107 ortholog                                         | KIAA1107  | 705652    |
| KIAA1429 ortholog                                         | KIAA1429  | 699635    |
| Killer cell lectin-like receptor subfamily C, member 2    | KLRC2     | 709885    |
| Killer cell lectin-like receptor subfamily C, member 3    | KLRC3     | 709790    |
| Killer cell lectin-like receptor subfamily F, member 1    | KLRF1     | 574389    |
| Killer cell lectin-like receptor subfamily G, member 1    | KLRG1     | 716727    |
| Killer-cell Ig-like receptor KIR3DL12                     | KIR3DL12  | 100125560 |
| Kin of IRRE like 2 (Drosophila)                           | KIRREL2   | 711175    |
| Kinesin family member 13A                                 | KIF13A    | 704126    |
| Kinesin family member 2B                                  | KIF2B     | 705683    |
| Kinesin family member 3C                                  | KIF3C     | 695287    |
| Kinesin family member 5A                                  | KIF5A     | 711936    |
| Kinesin light chain 3                                     | KLC3      | 714331    |
| Klotho beta                                               | KLB       | 699115    |
| KN motif and ankyrin repeat domains 4                     | KANK4     | 695040    |
| Kv channel interacting protein 2                          | KCNIP2    | 712434    |
| Lacritin                                                  | LACRT     | 654418    |
| Lactalbumin, alpha-                                       | LALBA     | 707442    |
| Lactoperoxidase                                           | LPO       | 709848    |
| Ladybird homeobox 1                                       | LBX1      | 711761    |
| Laminin subunit beta 2                                    | LAMB2     | 707892    |
| Late cornified envelope 3C                                | LCE3C     | 100423544 |
| Late cornified envelope 4A                                | LCE4A     | 100423936 |
| Late cornified envelope 5A                                | LCE5A     | 100423328 |
| Late cornified envelope-like proline-rich 1               | LELP1     | 714425    |
| LCK proto-oncogene, Src family tyrosine kinase            | LCK       | 717704    |
| LDL receptor related protein 2                            | LRP2      | 705786    |
| Lectin, galactoside-binding, soluble, 12                  | LGALS12   | 718300    |
| Lectin, galactoside-binding, soluble, 14                  | LGALS14   | 698227    |
| Lectin, galactoside-binding, soluble, 2                   | LGALS2    | 697820    |
| Leiomodin 3 (fetal)                                       | LMOD3     | 696239    |
| Lengsin, lens protein with glutamine synthetase domain    | LGSN      | 715903    |
| Lens intrinsic membrane protein 2                         | LIM2      | 719639    |
| LETM1 domain containing 1                                 | LETMD1    | 694422    |
| Leucine rich repeat and coiled-coil centrosomal protein 1 | LRRCC1    | 707964    |

|                                                                                          |        |           |
|------------------------------------------------------------------------------------------|--------|-----------|
| Leucine rich repeat and fibronectin type III domain containing 2                         | LRFN2  | 719621    |
| Leucine rich repeat and fibronectin type III domain containing 4                         | LRFN4  | 713166    |
| Leucine rich repeat and fibronectin type III domain containing 5                         | LRFN5  | 700512    |
| Leucine rich repeat containing 10                                                        | LRRC10 | 718434    |
| Leucine rich repeat containing 14                                                        | LRRC14 | 703587    |
| Leucine rich repeat containing 31                                                        | LRRC31 | 697710    |
| Leucine rich repeat containing 36                                                        | LRRC36 | 697849    |
| Leucine rich repeat containing 42                                                        | LRRC42 | 714839    |
| Leucine rich repeat containing 61                                                        | LRRC61 | 704779    |
| Leucine rich repeat neuronal 4                                                           | LRN4   | 718283    |
| Leucine rich repeat transmembrane neuronal 2                                             | LRRTM2 | 714713    |
| Leucine rich repeat transmembrane neuronal 3                                             | LRRTM3 | 696536    |
| Leucine rich repeat transmembrane neuronal 4                                             | LRRTM4 | 711411    |
| Leucine-rich repeat containing 8 family member E                                         | LRRC8E | 706394    |
| Leucine-rich repeat LGI family member 3                                                  | LGI3   | 715871    |
| Leucine-rich repeat, immunoglobulin-like and transmembrane domains 1                     | LRIT1  | 698385    |
| Leucine-rich repeats and immunoglobulin-like domains 3                                   | LRIG3  | 716344    |
| Leucine-rich repeats and transmembrane domains 1                                         | LRTM1  | 705947    |
| Leucine-rich repeats and WD repeat domain containing 1                                   | LRWD1  | 715187    |
| Leucine-rich single-pass membrane protein 2                                              | LSMEM2 | 703202    |
| Leucine-rich, glioma inactivated 1                                                       | LGI1   | 700520    |
| Leukocyte cell derived chemotaxin 1                                                      | LECT1  | 694189    |
| Leukocyte cell-derived chemotaxin 2                                                      | LECT2  | 712424    |
| Leukocyte immunoglobulin-like receptor, subfamily A (without TM domain), member 3        | LILRA3 | 692337    |
| Leukocyte immunoglobulin-like receptor, subfamily B (with TM and ITIM domains), member 1 | LILRB1 | 692340    |
| Leukocyte receptor cluster (LRC) member 1                                                | LENG1  | 693417    |
| Leukocyte-associated immunoglobulin-like receptor 1                                      | LAIR1  | 695533    |
| Leukotriene B4 receptor 2                                                                | LTB4R2 | 716012    |
| Leupaxin                                                                                 | LPXN   | 702033    |
| Ligase III, DNA, ATP-dependent                                                           | LIG3   | 715181    |
| Ligase IV, DNA, ATP-dependent                                                            | LIG4   | 695475    |
| LIM domain binding 2                                                                     | LDB2   | 714918    |
| LIM domain only 1                                                                        | LMO1   | 100425592 |
| LIM homeobox 5                                                                           | LHX5   | 713417    |
| LIM homeobox 9                                                                           | LHX9   | 710636    |
| Limb and CNS expressed 1                                                                 | LIX1   | 700619    |
| Limb development membrane protein 1-like                                                 | LMBR1L | 709548    |
| Lin-28 homolog B (C. Elegans)                                                            | LIN28B | 696130    |
| Lipase, family member J                                                                  | LIPJ   | 693463    |
| Lipocalin 1                                                                              | LCN1   | 711974    |
| Lipocalin 6                                                                              | LCN6   | 574148    |
| Lipoma HMGIC fusion partner-like 1                                                       | LHFPL1 | 707492    |

|                                                                                        |          |           |
|----------------------------------------------------------------------------------------|----------|-----------|
| Lipopolysaccharide-induced TNF factor                                                  | LITAF    | 711743    |
| Low density lipoprotein receptor adaptor protein 1                                     | LDLRAP1  | 713032    |
| Low density lipoprotein receptor class A domain containing 1                           | LDLRAD1  | 716707    |
| LSM12 homolog                                                                          | LSM12    | 714219    |
| LSM14A mrna processing body assembly factor                                            | LSM14A   | 705085    |
| Ly6/neurotoxin 1                                                                       | LYNX1    | 574359    |
| Ly6/neurotoxin 1                                                                       | LYNX1    | 100428512 |
| LY6/PLAUR domain containing 4                                                          | LYPD4    | 706070    |
| Lymphocyte antigen 6 complex, locus D                                                  | LY6D     | 695450    |
| Lymphocyte antigen 6 complex, locus G6C                                                | LY6G6C   | 716220    |
| Lymphotoxin alpha                                                                      | LTA      | 715425    |
| Lysine (K)-specific methyltransferase 5C                                               | KMT5C    | 699963    |
| Lysine-rich nucleolar protein 1                                                        | KNOP1    | 695144    |
| Lysophosphatidic acid receptor 5                                                       | LPAR5    | 713283    |
| Lysophosphatidylcholine acyltransferase 4                                              | LPCAT4   | 696388    |
| Lysophospholipase II                                                                   | LYPLA2   | 719074    |
| Lysozyme G-like 1                                                                      | LYG1     | 709203    |
| Lysozyme G-like 2                                                                      | LYG2     | 713778    |
| Lysozyme-like 4                                                                        | LYZL4    | 716549    |
| Lysyl oxidase like 1                                                                   | LOXL1    | 706464    |
| MAD2 mitotic arrest deficient-like 2 (yeast)                                           | MAD2L2   | 714527    |
| MAD2L1 binding protein                                                                 | MAD2L1BP | 701099    |
| MAF1 homolog, negative regulator of RNA polymerase III                                 | MAF1     | 700385    |
| MAGE family member B1                                                                  | MAGEB1   | 703810    |
| MAGE family member B18                                                                 | MAGEB18  | 700524    |
| MAGE family member B3                                                                  | MAGEB3   | 703705    |
| MAGE family member D2                                                                  | MAGED2   | 701719    |
| Mago homolog, exon junction complex core component                                     | MAGOH    | 714261    |
| Major facilitator superfamily domain containing 14B                                    | MFSD14B  | 708498    |
| Major histocompatibility complex, class I, A                                           | MAMU-A3  | 699243    |
| Major histocompatibility complex, class I, E                                           | MAMU-E   | 711532    |
| Major histocompatibility complex, class II, DM alpha                                   | MAMU-DMA | 717870    |
| Major histocompatibility complex, class II, DM beta                                    | MAMU-DMB | 100429856 |
| Major intrinsic protein of lens fiber                                                  | MIP      | 712901    |
| Mal, T-cell differentiation protein-like                                               | MALL     | 696102    |
| Male-enhanced antigen 1                                                                | MEA1     | 699300    |
| Mannose receptor, C type 1                                                             | MRC1     | 701010    |
| Mannosidase, alpha, class 1B, member 1                                                 | MAN1B1   | 706918    |
| Mannosidase, alpha, class 2B, member 1                                                 | MAN2B1   | 716173    |
| Mannosidase, beta A, lysosomal                                                         | MANBA    | 712531    |
| Mannosyl (alpha-1,3-)-glycoprotein beta-1,2-N-acetylglucosaminyltransferase            | MGAT1    | 707375    |
| Mannosyl (alpha-1,6-)-glycoprotein beta-1,6-N-acetylglucosaminyltransferase            | MGAT5    | 709108    |
| Mannosyl (alpha-1,6-)-glycoprotein beta-1,6-N-acetylglucosaminyltransferase, isozyme B | MGAT5B   | 708299    |
| MAP7 domain containing 1                                                               | MAP7D1   | 712899    |
| MAP-kinase activating death domain                                                     | MADD     | 713613    |

|                                                                      |          |           |
|----------------------------------------------------------------------|----------|-----------|
| MAS related GPR family member D                                      | MRGPRD   | 709555    |
| MAS-related GPR, member X4                                           | MRGPRX4  | 692123    |
| Mast cell immunoglobulin-like receptor 1                             | MILR1    | 717835    |
| Matrin 3                                                             | MATR3    | 100568448 |
| Matrix extracellular phosphoglycoprotein                             | MEPE     | 701943    |
| Matrix metallopeptidase 12                                           | MMP12    | 703867    |
| Matrix metallopeptidase 20                                           | MMP20    | 703188    |
| Matrix metallopeptidase 21                                           | MMP21    | 695797    |
| Matrix metallopeptidase 24                                           | MMP24    | 712005    |
| Matrix metallopeptidase 27                                           | MMP27    | 703307    |
| Matrix metallopeptidase 8                                            | MMP8     | 703536    |
| MAX dimerization protein 1                                           | MXD1     | 701784    |
| MDM2 binding protein                                                 | MTBP     | 703121    |
| Mediator complex subunit 14                                          | MED14    | 699395    |
| Mediator complex subunit 23                                          | MED23    | 714629    |
| Mediator complex subunit 6                                           | MED6     | 693320    |
| Meiosis 1 associated protein                                         | M1AP     | 710210    |
| Melanin concentrating hormone receptor 2                             | MCHR2    | 574369    |
| Melanocortin 2 receptor accessory protein                            | MRAP     | 701330    |
| Melanocortin 4 receptor                                              | MC4R     | 698596    |
| Melanocortin 5 receptor                                              | MC5R     | 701447    |
| Melanoma antigen family B, 4                                         | MAGEB4   | 703918    |
| Melanoma antigen family C, 2                                         | MAGEC2   | 697762    |
| Melatonin receptor 1A                                                | MTNR1A   | 702686    |
| Melatonin receptor 1B                                                | MTNR1B   | 695629    |
| Membrane associated guanylate kinase, WW and PDZ domain containing 3 | MAGI3    | 709341    |
| Membrane frizzled-related protein                                    | MFRP     | 704965    |
| Membrane protein, palmitoylated 7                                    | MPP7     | 709246    |
| Membrane-spanning 4-domains, subfamily A, member 1                   | MS4A1    | 696843    |
| Membrane-spanning 4-domains, subfamily A, member 4A                  | MS4A4A   | 698027    |
| Membrane-spanning 4-domains, subfamily A, member 7                   | MS4A7    | 697200    |
| Meprin A subunit beta                                                | MEP1B    | 707036    |
| Metallothionein 3                                                    | MT3      | 700602    |
| Metaxin 1                                                            | MTX1     | 717595    |
| Methionine adenosyltransferase I, alpha                              | MAT1A    | 700519    |
| Methionine sulfoxide reductase B3                                    | MSRB3    | 717617    |
| Microfibrillar associated protein 3 like                             | MFAP3L   | 694985    |
| Microtubule associated protein 1 light chain 3 alpha                 | MAP1LC3A | 707439    |
| Microtubule associated protein 1S                                    | MAP1S    | 719196    |
| Microtubule associated protein 2                                     | MAP2     | 710840    |
| Microtubule associated serine/threonine kinase 1                     | MAST1    | 717903    |
| Microtubule associated serine/threonine kinase like                  | MASTL    | 708134    |
| Midline 1                                                            | MID1     | 709683    |
| Midnolin                                                             | MIDN     | 721215    |
| Minichromosome maintenance complex binding protein                   | MCMBP    | 704028    |
| Mitochondrial E3 ubiquitin protein ligase 1                          | MUL1     | 705429    |
| Mitochondrial elongation factor 2                                    | MIEF2    | 700705    |

|                                                                   |         |           |
|-------------------------------------------------------------------|---------|-----------|
| Mitochondrial ribosomal protein L11                               | MRPL11  | 714094    |
| Mitochondrial ribosomal protein L17                               | MRPL17  | 697086    |
| Mitochondrial ribosomal protein L18                               | MRPL18  | 702629    |
| Mitochondrial ribosomal protein L36                               | MRPL36  | 100430880 |
| Mitochondrial ribosomal protein L37                               | MRPL37  | 715168    |
| Mitochondrial ribosomal protein L42                               | MRPL42  | 715676    |
| Mitochondrial ribosomal protein L43                               | MRPL43  | 711038    |
| Mitochondrial ribosomal protein L9                                | MRPL9   | 711235    |
| Mitochondrial ribosomal protein S18C                              | MRPS18C | 707257    |
| Mitochondrial ribosomal protein S21                               | MRPS21  | 706805    |
| Mitochondrial ribosomal protein S9                                | MRPS9   | 712968    |
| Mitogen-activated protein kinase 11                               | MAPK11  | 715794    |
| Mitogen-activated protein kinase 12                               | MAPK12  | 715745    |
| Mitogen-activated protein kinase kinase kinase 14                 | MAP3K14 | 716258    |
| Mitogen-activated protein kinase kinase kinase 6                  | MAP3K6  | 715911    |
| Mitogen-activated protein kinase kinase kinase 9                  | MAP3K9  | 693835    |
| Mitogen-activated protein kinase kinase kinase kinase 2           | MAP4K2  | 699331    |
| Molybdenum cofactor synthesis 2                                   | MOCS2   | 703689    |
| Monoacylglycerol O-acyltransferase 2                              | MOGAT2  | 696347    |
| Motilin receptor                                                  | MLNR    | 705803    |
| Mov10 RISC complex RNA helicase                                   | MOV10   | 705910    |
| MRE11 homolog A, double strand break repair nuclease              | MRE11A  | 697566    |
| Msh homeobox 2                                                    | MSX2    | 694227    |
| Mucin 13, cell surface associated                                 | MUC13   | 716407    |
| Multiple C2 domains, transmembrane 2                              | MCTP2   | 706949    |
| Murine retrovirus integration site 1 homolog                      | MRVI1   | 702830    |
| Muscle RAS oncogene homolog                                       | MRAS    | 716352    |
| Muscle, skeletal, receptor tyrosine kinase                        | MUSK    | 709397    |
| MYCBP-associated, testis expressed 1                              | MAATS1  | 712979    |
| Myelin oligodendrocyte glycoprotein                               | MOG     | 711347    |
| Myelin regulatory factor                                          | MYRF    | 719083    |
| Myelin transcription factor 1                                     | MYT1    | 719050    |
| Myeloid/lymphoid or mixed-lineage leukemia;<br>translocated to, 6 | MLLT6   | 694045    |
| Myeloperoxidase                                                   | MPO     | 714246    |
| Myocardin                                                         | MYOCD   | 718193    |
| Myocyte enhancer factor 2C                                        | MEF2C   | 694992    |
| Myogenic differentiation 1                                        | MYOD1   | 696222    |
| Myogenic factor 5                                                 | MYF5    | 697426    |
| Myoglobin                                                         | MB      | 693269    |
| Myosin IG                                                         | MYO1G   | 698101    |
| Myosin IIIA                                                       | MYO3A   | 707165    |
| Myosin light chain 2                                              | MYL2    | 711937    |
| Myosin VA                                                         | MYO5A   | 574273    |
| Myosin XVIII A                                                    | MYO18A  | 711171    |
| Myosin, heavy chain 2, skeletal muscle, adult                     | MYH2    | 717912    |
| Myosin, heavy chain 4, skeletal muscle                            | MYH4    | 717888    |
| Myotilin                                                          | MYOT    | 716285    |

|                                                                                                |         |           |
|------------------------------------------------------------------------------------------------|---------|-----------|
| Myotubularin 1                                                                                 | MTM1    | 703131    |
| Myotubularin related protein 2                                                                 | MTMR2   | 699703    |
| Myotubularin related protein 8                                                                 | MTMR8   | 708037    |
| Myozenin 1                                                                                     | MYOZ1   | 706768    |
| Myozenin 2                                                                                     | MYOZ2   | 705000    |
| N(alpha)-acetyltransferase 16, nata auxiliary subunit                                          | NAA16   | 698843    |
| N-6 adenine-specific DNA methyltransferase 1 (putative)                                        | N6AMT1  | 706937    |
| N-6 adenine-specific DNA methyltransferase 2 (putative)                                        | N6AMT2  | 703665    |
| N-acetyltransferase 2 (arylamine N-acetyltransferase)                                          | NAT2    | 704357    |
| N-acetyltransferase 8-like (GCN5-related, putative)                                            | NAT8L   | 722359    |
| NAD(P)H dehydrogenase, quinone 2                                                               | NQO2    | 707675    |
| NADH:ubiquinone oxidoreductase complex assembly factor 4                                       | NDUFAF4 | 705102    |
| NADH:ubiquinone oxidoreductase subunit A12                                                     | NDUFA12 | 711970    |
| NADPH oxidase organizer 1                                                                      | NOXO1   | 694059    |
| Napsin A aspartic peptidase                                                                    | NAPSA   | 719243    |
| Natriuretic peptide A                                                                          | NPPA    | 714994    |
| Natriuretic peptide receptor 2                                                                 | NPR2    | 695750    |
| Natural cytotoxicity triggering receptor 2                                                     | NCR2    | 693869    |
| N-deacetylase/N-sulfotransferase (heparan glucosaminyl) 3                                      | NDST3   | 704244    |
| Nebulette                                                                                      | NEBL    | 702764    |
| Nedd4 family interacting protein 1                                                             | NDFIP1  | 705716    |
| Negative elongation factor complex member E                                                    | NELFE   | 716913    |
| Nephrosis 2, idiopathic, steroid-resistant (podocin)                                           | NPHS2   | 100430824 |
| Nerve growth factor receptor                                                                   | NGFR    | 574304    |
| Neudesin neurotrophic factor                                                                   | NENF    | 710911    |
| Neural cell adhesion molecule 1                                                                | NCAM1   | 693789    |
| Neural EGFL like 1                                                                             | NELL1   | 701438    |
| Neural EGFL like 2                                                                             | NELL2   | 703134    |
| Neural precursor cell expressed, developmentally down-regulated 1                              | NEDD1   | 713673    |
| Neural precursor cell expressed, developmentally down-regulated 4, E3 ubiquitin protein ligase | NEDD4   | 699550    |
| Neural proliferation, differentiation and control, 1                                           | NPDC1   | 707453    |
| Neural retina leucine zipper                                                                   | NRL     | 714967    |
| Neuraminidase 2 (cytosolic sialidase)                                                          | NEU2    | 713979    |
| Neuraminidase 3 (membrane sialidase)                                                           | NEU3    | 694310    |
| Neuraminidase 4 (sialidase)                                                                    | NEU4    | 702264    |
| Neurensin 2                                                                                    | NRSN2   | 714586    |
| Neurexophilin 2                                                                                | NXPH2   | 704413    |
| Neuritin 1                                                                                     | NRN1    | 722968    |
| Neurofibromin 2 (merlin)                                                                       | NF2     | 714945    |
| Neurofilament, light polypeptide                                                               | NEFL    | 641444    |
| Neurogenin 3                                                                                   | NEUROG3 | 711583    |
| Neuroglobin                                                                                    | NGB     | 641331    |
| Neuron navigator 3                                                                             | NAV3    | 694815    |
| Neuronal differentiation 1                                                                     | NEUROD1 | 704954    |
| Neuronal differentiation 2                                                                     | NEUROD2 | 696976    |
| Neuronal differentiation 4                                                                     | NEUROD4 | 706605    |

|                                                                      |        |           |
|----------------------------------------------------------------------|--------|-----------|
| Neuronal PAS domain protein 2                                        | NPAS2  | 710480    |
| Neuronal PAS domain protein 3                                        | NPAS3  | 717281    |
| Neuronal PAS domain protein 4                                        | NPAS4  | 714161    |
| Neuronal pentraxin I                                                 | NPTX1  | 718259    |
| Neuropeptide S receptor 1                                            | NPSR1  | 574355    |
| Neuropeptide Y receptor Y4                                           | NPY4R  | 694492    |
| Neuropeptide Y receptor Y5                                           | NPY5R  | 574150    |
| Neuropeptides B/W receptor 2                                         | NPBWR2 | 719200    |
| Neuropilin 2                                                         | NRP2   | 574301    |
| Neuropilin and tolloid like 1                                        | NETO1  | 694322    |
| Neurotensin receptor 2                                               | NTSR2  | 697563    |
| Neurotrophic tyrosine kinase, receptor, type 2                       | NTRK2  | 709757    |
| Neutrophil cytosolic factor 1                                        | NCF1   | 694207    |
| Neutrophil cytosolic factor 4                                        | NCF4   | 695612    |
| N-glycanase 1                                                        | NGLY1  | 700842    |
| Nicotinamide nucleotide transhydrogenase                             | NNT    | 701110    |
| NK2 homeobox 1                                                       | NKX2-1 | 696771    |
| NK2 homeobox 5                                                       | NKX2-5 | 703795    |
| NK3 homeobox 2                                                       | NKX3-2 | 713627    |
| NK6 homeobox 1                                                       | NKX6-1 | 706844    |
| NK6 homeobox 2                                                       | NKX6-2 | 700637    |
| NKG2D protein                                                        | NKG2D  | 574240    |
| NLR family, CARD domain containing 3                                 | NLRC3  | 705633    |
| NLR family, CARD domain containing 4                                 | NLRC4  | 706378    |
| NLR family, pyrin domain containing 1                                | NLRP1  | 721648    |
| NLR family, pyrin domain containing 10                               | NLRP10 | 709794    |
| NLR family, pyrin domain containing 13                               | NLRP13 | 703668    |
| NLR family, pyrin domain containing 4                                | NLRP4  | 703431    |
| NLR family, pyrin domain containing 6                                | NLRP6  | 720741    |
| NLR family, pyrin domain containing 8                                | NLRP8  | 100135416 |
| NLR family, pyrin domain containing 9                                | NLRP9  | 719115    |
| N-myristoyltransferase 1                                             | NMT1   | 715885    |
| NOC2-like nucleolar associated transcriptional repressor             | NOC2L  | 697809    |
| Nodal growth differentiation factor                                  | NODAL  | 710424    |
| Non-SMC condensin I complex subunit D2                               | NCAPD2 | 712834    |
| Non-SMC condensin I complex subunit G                                | NCAPG  | 715235    |
| N-terminal EF-hand calcium binding protein 1                         | NECAB1 | 696533    |
| N-terminal Xaa-Pro-Lys N-methyltransferase 1                         | NTMT1  | 716763    |
| Nuclear casein kinase and cyclin-dependent kinase substrate 1        | NUCKS1 | 697298    |
| Nuclear factor of kappa light polypeptide gene enhancer in B-cells 1 | NFKB1  | 710324    |
| Nuclear factor, erythroid 2                                          | NFE2   | 705061    |
| Nuclear pore associated protein 1                                    | NPAP1  | 719891    |
| Nuclear receptor binding SET domain protein 1                        | NSD1   | 706131    |
| Nuclear receptor coactivator 2                                       | NCOA2  | 693455    |
| Nuclear receptor subfamily 0 group B member 2                        | NR0B2  | 715170    |
| Nuclear receptor subfamily 1 group I member 2                        | NR1I2  | 574226    |



|                                                      |        |           |
|------------------------------------------------------|--------|-----------|
| Nuclear receptor subfamily 2 group E member 1        | NR2E1  | 701101    |
| Nuclear receptor subfamily 5 group A member 1        | NR5A1  | 694183    |
| Nuclear transcription factor Y subunit alpha         | NFYA   | 719697    |
| Nucleolar protein 4                                  | NOL4   | 707772    |
| Nucleoporin 50kda                                    | NUP50  | 713282    |
| Nucleoredoxin-like 1                                 | NXNL1  | 719125    |
| Nude neurodevelopment protein 1-like 1               | NDEL1  | 721973    |
| Nudix hydrolase 1                                    | NUDT1  | 713078    |
| NUT midline carcinoma, family member 1               | NUTM1  | 696271    |
| Odontogenic, ameloblast associated                   | ODAM   | 707906    |
| Olfactory marker protein                             | OMP    | 698210    |
| Olfactory receptor 10G2                              | OR10G2 | 708692    |
| Olfactory receptor 4D9                               | OR4D9  | 699152    |
| Olfactory receptor 4S2                               | OR4S2  | 708446    |
| Olfactory receptor 5B3                               | OR5B3  | 701735    |
| Olfactory receptor 8B8                               | OR8B8  | 715727    |
| Olfactory receptor, family 1, subfamily M, member 1  | OR1M1  | 713073    |
| Olfactory receptor, family 1, subfamily Q, member 1  | OR1Q1  | 697695    |
| Olfactory receptor, family 1, subfamily S, member 2  | OR1S1  | 703185    |
| Olfactory receptor, family 10, subfamily A, member 4 | OR10A4 | 100423176 |
| Olfactory receptor, family 10, subfamily A, member 6 | OR10A6 | 709892    |
| Olfactory receptor, family 10, subfamily A, member 7 | OR10A7 | 707219    |
| Olfactory receptor, family 10, subfamily G, member 3 | OR10G3 | 707265    |
| Olfactory receptor, family 10, subfamily G, member 7 | OR10G7 | 714975    |
| Olfactory receptor, family 10, subfamily Q, member 1 | OR10Q1 | 702100    |
| Olfactory receptor, family 12, subfamily D, member 2 | OR12D2 | 708163    |
| Olfactory receptor, family 13, subfamily C, member 8 | OR13C8 | 716401    |
| Olfactory receptor, family 14, subfamily J, member 1 | OR14J1 | 710039    |
| Olfactory receptor, family 2, subfamily A, member 1  | OR2A1  | 709416    |
| Olfactory receptor, family 2, subfamily A, member 2  | OR2A2  | 708745    |
| Olfactory receptor, family 2, subfamily A, member 25 | OR2A25 | 708513    |
| Olfactory receptor, family 2, subfamily AG, member 2 | OR2AG2 | 709556    |
| Olfactory receptor, family 2, subfamily AT, member 4 | OR2AT4 | 694711    |
| Olfactory receptor, family 2, subfamily B, member 3  | OR2B3  | 708747    |
| Olfactory receptor, family 2, subfamily F, member 1  | OR2F1  | 707900    |
| Olfactory receptor, family 2, subfamily H, member 2  | OR2H2  | 710946    |
| Olfactory receptor, family 2, subfamily J, member 3  | OR2J3  | 708943    |
| Olfactory receptor, family 2, subfamily W, member 1  | OR2W1  | 708515    |
| Olfactory receptor, family 4, subfamily A, member 47 | OR4A47 | 709347    |
| Olfactory receptor, family 4, subfamily B, member 1  | OR4B1  | 712346    |
| Olfactory receptor, family 4, subfamily D, member 11 | OR4D11 | 699579    |
| Olfactory receptor, family 4, subfamily D, member 5  | OR4D5  | 709394    |
| Olfactory receptor, family 4, subfamily D, member 6  | OR4D6  | 699831    |
| Olfactory receptor, family 4, subfamily E, member 2  | OR4E2  | 708887    |
| Olfactory receptor, family 4, subfamily F, member 15 | OR4F15 | 699433    |
| Olfactory receptor, family 4, subfamily F, member 3  | OR4F3  | 696525    |
| Olfactory receptor, family 4, subfamily F, member 6  | OR4F6  | 699304    |
| Olfactory receptor, family 4, subfamily K, member 1  | OR4K1  | 698752    |

|                                                                           |        |           |
|---------------------------------------------------------------------------|--------|-----------|
| Olfactory receptor, family 4, subfamily K, member 17                      | OR4K17 | 697616    |
| Olfactory receptor, family 4, subfamily N, member 2                       | OR4N2  | 701881    |
| Olfactory receptor, family 4, subfamily N, member 4                       | OR4N4  | 699628    |
| Olfactory receptor, family 4, subfamily N, member 5                       | OR4N5  | 700553    |
| Olfactory receptor, family 4, subfamily Q, member 3                       | OR4Q3  | 100426664 |
| Olfactory receptor, family 5, subfamily A, member 2                       | OR5A2  | 700070    |
| Olfactory receptor, family 5, subfamily AN, member 1                      | OR5AN1 | 699535    |
| Olfactory receptor, family 5, subfamily AP, member 2                      | OR5AP2 | 707331    |
| Olfactory receptor, family 5, subfamily AU, member 1                      | OR5AU1 | 707735    |
| Olfactory receptor, family 5, subfamily K, member 1                       | OR5K1  | 698340    |
| Olfactory receptor, family 5, subfamily L, member 1                       | OR5L1  | 719174    |
| Olfactory receptor, family 5, subfamily M, member 1                       | OR5M1  | 719278    |
| Olfactory receptor, family 5, subfamily M, member 9                       | OR5M9  | 705878    |
| Olfactory receptor, family 5, subfamily V, member 1                       | OR5V1  | 710231    |
| Olfactory receptor, family 51, subfamily A, member 4                      | OR51A4 | 100425536 |
| Olfactory receptor, family 51, subfamily B, member 5                      | OR51B5 | 696727    |
| Olfactory receptor, family 51, subfamily G, member 2                      | OR51G2 | 716960    |
| Olfactory receptor, family 51, subfamily M, member 1                      | OR51M1 | 715244    |
| Olfactory receptor, family 51, subfamily S, member 1                      | OR51S1 | 717205    |
| Olfactory receptor, family 52, subfamily M, member 1                      | OR52M1 | 717723    |
| Olfactory receptor, family 52, subfamily N, member 4                      | OR52N4 | 696970    |
| Olfactory receptor, family 52, subfamily W, member 1                      | OR52W1 | 713141    |
| Olfactory receptor, family 6, subfamily C, member 4                       | OR6C4  | 708807    |
| Olfactory receptor, family 6, subfamily M, member 1                       | OR6M1  | 714825    |
| Olfactory receptor, family 6, subfamily N, member 1                       | OR6N1  | 719958    |
| Olfactory receptor, family 6, subfamily X, member 1                       | OR6X1  | 714774    |
| Olfactory receptor, family 7, subfamily D, member 4                       | OR7D4  | 721322    |
| Olfactory receptor, family 8, subfamily B, member 12                      | OR8B12 | 715893    |
| Olfactory receptor, family 8, subfamily B, member 4                       | OR8B4  | 715678    |
| Olfactory receptor, family 8, subfamily G, member 5                       | OR8G5  | 715245    |
| Olfactory receptor, family 8, subfamily H, member 3                       | OR8H3  | 707077    |
| Olfactory receptor, family 8, subfamily I, member 2                       | OR8I2  | 709392    |
| Olfactory receptor, family 9, subfamily K, member 2                       | OR9K2  | 706908    |
| Oligodendrocyte myelin glycoprotein                                       | OMG    | 713044    |
| Oligodendrocyte transcription factor 3                                    | OLIG3  | 704455    |
| Oncomodulin 2                                                             | OCM2   | 721827    |
| Oncoprotein induced transcript 3                                          | OIT3   | 708137    |
| Oncostatin M                                                              | OSM    | 717994    |
| Opioid binding protein/cell adhesion molecule-like                        | OPCML  | 693404    |
| Opioid receptor, mu 1                                                     | OPRM1  | 574141    |
| Opsin 5                                                                   | OPN5   | 705586    |
| Optic atrophy 3 (autosomal recessive, with chorea and spastic paraplegia) | OPA3   | 714806    |
| Origin recognition complex subunit 5                                      | ORC5   | 696683    |
| ORMDL sphingolipid biosynthesis regulator 2                               | ORMDL2 | 710296    |
| Ornithine decarboxylase antizyme 2                                        | OAZ2   | 707593    |
| Orthodenticle homeobox 2                                                  | OTX2   | 698501    |
| Osteosarcoma amplified 9, endoplasmic reticulum lectin                    | OS9    | 715555    |

|                                                           |          |           |
|-----------------------------------------------------------|----------|-----------|
| Otoancorin                                                | OTOA     | 699600    |
| Otopetrin 1                                               | OTOP1    | 712780    |
| Otoraplin                                                 | OTOR     | 695505    |
| OTU deubiquitinase 6A                                     | OTUD6A   | 694498    |
| Outer dense fiber of sperm tails 1                        | ODF1     | 707269    |
| Outer dense fiber of sperm tails 3                        | ODF3     | 696480    |
| Outer dense fiber of sperm tails 3-like 1                 | ODF3L1   | 706545    |
| Oviductal glycoprotein 1                                  | OVGP1    | 703848    |
| Ovochymase 2                                              | OVCH2    | 707558    |
| Oxidized low density lipoprotein (lectin-like) receptor 1 | OLR1     | 717596    |
| Oxoglutarate (alpha-ketoglutarate) receptor 1             | OXGR1    | 696735    |
| Oxysterol binding protein like 5                          | OSBPL5   | 706613    |
| P21 protein (Cdc42/Rac)-activated kinase 1                | PAK1     | 698585    |
| P21 protein (Cdc42/Rac)-activated kinase 6                | PAK6     | 701589    |
| P450 (cytochrome) oxidoreductase                          | POR      | 715888    |
| P53 and DNA damage regulated 1                            | PDRG1    | 712622    |
| PAGE family member 4                                      | PAGE4    | 693847    |
| Paired box 3                                              | PAX3     | 705315    |
| Paired box 9                                              | PAX9     | 100429088 |
| Paired related homeobox 2                                 | PRRX2    | 716699    |
| Paired-like homeobox 2b                                   | PHOX2B   | 701940    |
| Paired-like homeodomain 2                                 | PITX2    | 699737    |
| Pancreatic and duodenal homeobox 1                        | PDX1     | 710936    |
| Pancreatic lipase                                         | PNLIP    | 706689    |
| Pancreatic lipase-related protein 3                       | PNLIPRP3 | 699762    |
| Pancreatic polypeptide                                    | PPY      | 713988    |
| Pannexin 3                                                | PANX3    | 711728    |
| PAP associated domain containing 7                        | PAPD7    | 713853    |
| Par-3 family cell polarity regulator                      | PARD3    | 706472    |
| Par-6 family cell polarity regulator alpha                | PARD6A   | 699351    |
| Paralemmin 2                                              | PALM2    | 100532752 |
| Paraoxonase 1                                             | PON1     | 699355    |
| Patatin like phospholipase domain containing 5            | PNPLA5   | 712261    |
| PAX3 and PAX7 binding protein 1                           | PAXBP1   | 700489    |
| PCI domain containing 2                                   | PCID2    | 714247    |
| PDLIM1 interacting kinase 1 like                          | PDIK1L   | 719774    |
| PDZ and LIM domain 1                                      | PDLIM1   | 702998    |
| PDZ domain containing 3                                   | PDZD3    | 704100    |
| PDZ domain containing 4                                   | PDZD4    | 697387    |
| Peptidyl arginine deiminase, type III                     | PADI3    | 700560    |
| Peptidyl arginine deiminase, type IV                      | PADI4    | 700806    |
| Peptidylprolyl isomerase B (cyclophilin B)                | PIIB     | 706757    |
| Peripherin                                                | PRPH     | 709827    |
| Peroxiredoxin 2                                           | PRDX2    | 716665    |
| Peroxisomal biogenesis factor 16                          | PEX16    | 714904    |
| Peroxisome proliferator-activated receptor gamma          | PPARG    | 574190    |
| PHD finger protein 1                                      | PHF1     | 718337    |
| PHD finger protein 14                                     | PHF14    | 694855    |

|                                                                        |          |           |
|------------------------------------------------------------------------|----------|-----------|
| Phenylalanine hydroxylase                                              | PAH      | 698696    |
| Phosducin                                                              | PDC      | 716775    |
| Phosducin like 2                                                       | PDCL2    | 696014    |
| Phosphatase and actin regulator 1                                      | PHACTR1  | 700226    |
| Phosphatase and actin regulator 2                                      | PHACTR2  | 700363    |
| Phosphatase, orphan 1                                                  | PHOSPHO1 | 698959    |
| Phosphatase, orphan 2                                                  | PHOSPHO2 | 100429656 |
| Phosphate cytidylyltransferase 1, choline, alpha                       | PCYT1A   | 722105    |
| Phosphatidylinositol 4-kinase, catalytic, beta                         | PI4KB    | 710104    |
| Phosphatidylinositol glycan anchor biosynthesis class B                | PIGB     | 698122    |
| Phosphatidylinositol glycan anchor biosynthesis class H                | PIGH     | 710780    |
| Phosphatidylinositol glycan anchor biosynthesis class S                | PIGS     | 709115    |
| Phosphatidylinositol transfer protein alpha                            | PITPNA   | 721228    |
| Phosphatidylinositol transfer protein, membrane associated 2           | PITPNM2  | 703969    |
| Phosphatidylinositol-4,5-bisphosphate 3-kinase catalytic subunit beta  | PIK3CB   | 716098    |
| Phosphatidylinositol-4,5-bisphosphate 3-kinase catalytic subunit gamma | PIK3CG   | 698857    |
| Phosphodiesterase 6D                                                   | PDE6D    | 712629    |
| Phosphodiesterase 6H                                                   | PDE6H    | 700447    |
| Phosphodiesterase 9A                                                   | PDE9A    | 100301992 |
| Phosphoinositide kinase, FYVE finger containing                        | PIKFYVE  | 710115    |
| Phospholipase A2 group IB                                              | PLA2G1B  | 696712    |
| Phospholipase A2 group IIA                                             | PLA2G2A  | 704520    |
| Phospholipase A2 group XIIB                                            | PLA2G12B | 708031    |
| Phospholipase A2 group XV                                              | PLA2G15  | 702619    |
| Phospholipase B domain containing 1                                    | PLBD1    | 698939    |
| Phospholipase B domain containing 2                                    | PLBD2    | 714669    |
| Phospholipase C beta 2                                                 | PLCB2    | 701951    |
| Phospholipase C zeta 1                                                 | PLCZ1    | 703293    |
| Phospholipase D family member 3                                        | PLD3     | 701083    |
| Phospholipid scramblase 2                                              | PLSCR2   | 713298    |
| Phospholipid scramblase 3                                              | PLSCR3   | 721831    |
| Phosphopantothenoylcysteine decarboxylase                              | PPCDC    | 704015    |
| Phosphoribosyl pyrophosphate synthetase 1-like 1                       | PRPS1L1  | 708413    |
| Pituitary tumor-transforming 1 interacting protein                     | PTTG1IP  | 722061    |
| Piwi-like RNA-mediated gene silencing 2                                | PIWIL2   | 708028    |
| Placental growth factor                                                | PGF      | 701219    |
| Placenta-specific 1-like                                               | PLAC1L   | 698074    |
| Platelet-derived growth factor beta polypeptide                        | PDGFB    | 703173    |
| Pleckstrin 2                                                           | PLEK2    | 710419    |
| Pleckstrin and Sec7 domain containing 4                                | PSD4     | 701785    |
| Pleckstrin homology domain containing A8                               | PLEKHA8  | 696127    |
| Pleckstrin homology domain containing O1                               | PLEKHO1  | 706145    |
| Plexin B3                                                              | PLXNB3   | 696903    |
| Poliovirus receptor-related 2 (herpesvirus entry mediator B)           | PVRL2    | 713229    |
| Poliovirus receptor-related 4                                          | PVRL4    | 719843    |
| Poly(A) binding protein, cytoplasmic 1                                 | PABPC1   | 705847    |

|                                                                    |         |           |
|--------------------------------------------------------------------|---------|-----------|
| Poly(A) polymerase beta                                            | PAPOLB  | 100429856 |
| Poly(ADP-ribose) glycohydrolase                                    | PARG    | 709432    |
| Poly(ADP-ribose) polymerase family member 10                       | PARP10  | 708132    |
| Poly(ADP-ribose) polymerase family member 11                       | PARP11  | 721828    |
| Poly(ADP-ribose) polymerase family member 15                       | PARP15  | 715533    |
| Poly(rc) binding protein 2                                         | PCBP2   | 703175    |
| Poly(rc) binding protein 3                                         | PCBP3   | 709663    |
| Polybromo 1                                                        | PBRM1   | 696361    |
| Polycomb group ring finger 2                                       | PCGF2   | 694187    |
| Polyglutamine binding protein 1                                    | PQBP1   | 711678    |
| Polyhomeotic homolog 2 (Drosophila)                                | PHC2    | 710201    |
| Polymerase (DNA directed) kappa                                    | POLK    | 705713    |
| Polymerase (DNA directed), epsilon 3, accessory subunit            | POLE3   | 705074    |
| Polymerase (RNA) II (DNA directed) polypeptide I, 14.5kda          | POLR2I  | 712412    |
| Polymerase (RNA) III (DNA directed) polypeptide H (22.9kd)         | POLR3H  | 707546    |
| Polymerase (RNA) mitochondrial (DNA directed)                      | POLRMT  | 100426184 |
| Polynucleotide kinase 3'-phosphatase                               | PNKP    | 719084    |
| Polypeptide N-acetylgalactosaminyltransferase 13                   | GALNT13 | 696337    |
| Polypeptide N-acetylgalactosaminyltransferase 14                   | GALNT14 | 705068    |
| Polypeptide N-acetylgalactosaminyltransferase 15                   | GALNT15 | 694784    |
| Polypeptide N-acetylgalactosaminyltransferase 4                    | GALNT4  | 100430608 |
| Polypeptide N-acetylgalactosaminyltransferase 8                    | GALNT8  | 721912    |
| Potassium channel tetramerization domain containing 10             | KCTD10  | 707443    |
| Potassium channel tetramerization domain containing 3              | KCTD3   | 708471    |
| Potassium channel tetramerization domain containing 9              | KCTD9   | 711515    |
| Potassium channel, inwardly rectifying subfamily J, member 14      | KCNJ14  | 718011    |
| Potassium channel, inwardly rectifying subfamily J, member 15      | KCNJ15  | 693427    |
| Potassium channel, inwardly rectifying subfamily J, member 5       | KCNJ5   | 714799    |
| Potassium channel, inwardly rectifying subfamily J, member 6       | KCNJ6   | 693675    |
| Potassium channel, inwardly rectifying subfamily J, member 8       | KCNJ8   | 706369    |
| Potassium channel, subfamily K, member 4                           | KCNK4   | 717696    |
| Potassium channel, two pore domain subfamily K, member 16          | KCNK16  | 719585    |
| Potassium channel, two pore domain subfamily K, member 18          | KCNK18  | 701013    |
| Potassium channel, voltage gated eag related subfamily H, member 5 | KCNH5   | 705368    |
| Potassium channel, voltage gated eag related subfamily H, member 6 | KCNH6   | 717765    |
| Potassium channel, voltage gated eag related                       | KCNH7   | 702259    |

|                                                                       |          |           |
|-----------------------------------------------------------------------|----------|-----------|
| subfamily H, member 7                                                 |          |           |
| Potassium channel, voltage gated eag related subfamily H, member 8    | KCNH8    | 697225    |
| Potassium channel, voltage gated KQT-like subfamily Q, member 5       | KCNQ5    | 715426    |
| Potassium channel, voltage gated modifier subfamily V, member 1       | KCNV1    | 699636    |
| Potassium channel, voltage gated shaker related subfamily A, member 2 | KCNA2    | 702126    |
| Potassium channel, voltage gated shaker related subfamily A, member 5 | KCNA5    | 711886    |
| Potassium channel, voltage gated Shaw related subfamily C, member 2   | KCNC2    | 100430904 |
| Potassium voltage-gated channel, modifier subfamily S, member 1       | KCNS1    | 711715    |
| Potassium voltage-gated channel, modifier subfamily S, member 2       | KCNS2    | 703802    |
| POU class 3 homeobox 4                                                | POU3F4   | 710157    |
| POU class 4 homeobox 2                                                | POU4F2   | 703568    |
| POU class 4 homeobox 3                                                | POU4F3   | 707789    |
| PR domain containing 14                                               | PRDM14   | 693324    |
| PR domain containing 2, with ZNF domain                               | PRDM2    | 716295    |
| Pre T-cell antigen receptor alpha                                     | PTCRA    | 697470    |
| Pre-B-cell leukemia homeobox 1                                        | PBX1     | 694416    |
| PRELI domain containing 1                                             | PRELID1  | 699254    |
| Pre-mrna processing factor 3                                          | PRPF3    | 706898    |
| Presenilin enhancer gamma secretase subunit                           | PSENEN   | 100429008 |
| Prodynorphin                                                          | PDYN     | 716341    |
| Progesterone and adiponectin receptor family member VIII              | PAQR8    | 708418    |
| Programmed cell death 1 ligand 2                                      | PDCD1LG2 | 716003    |
| Prokineticin 2                                                        | PROK2    | 694450    |
| Prokineticin receptor 1                                               | PROKR1   | 699574    |
| Prolactin receptor                                                    | PRLR     | 699369    |
| Prolactin regulatory element binding                                  | PREB     | 700408    |
| Prolactin-induced protein                                             | PIP      | 705823    |
| Proline rich 19                                                       | PRR19    | 707663    |
| Proline rich 3                                                        | PRR3     | 711699    |
| Proline rich membrane anchor 1                                        | PRIMA1   | 100426272 |
| Proline, glutamate and leucine rich protein 1                         | PELP1    | 677854    |
| Proline-rich coiled-coil 2A                                           | PRRC2A   | 715715    |
| Prominin 1                                                            | PROM1    | 714610    |
| Promyelocytic leukemia                                                | PML      | 700379    |
| Proprotein convertase subtilisin/kexin type 2                         | PCSK2    | 695730    |
| Proprotein convertase subtilisin/kexin type 7                         | PCSK7    | 697567    |
| Prosaposin                                                            | PSAP     | 709510    |
| Prospero homeobox 1                                                   | PROX1    | 709465    |
| Prostaglandin D2 receptor (DP)                                        | PTGDR    | 707918    |
| Prostaglandin E synthase 3                                            | PTGES3   | 713353    |

|                                                                                                     |          |           |
|-----------------------------------------------------------------------------------------------------|----------|-----------|
| Prostaglandin F receptor (FP)                                                                       | PTGFR    | 707535    |
| Prostate and testis expressed 1                                                                     | PATE1    | 713491    |
| Protamine 1                                                                                         | PRM1     | 716327    |
| Protease, serine 37                                                                                 | PRSS37   | 694908    |
| Protease, serine 48                                                                                 | PRSS48   | 694666    |
| Protease, serine 50                                                                                 | PRSS50   | 713399    |
| Protease, serine 8                                                                                  | PRSS8    | 713176    |
| Proteasomal ATPase associated factor 1                                                              | PAAF1    | 718755    |
| Proteasome subunit alpha 4                                                                          | PSMA4    | 710417    |
| Proteasome subunit beta 2                                                                           | PSMB2    | 712193    |
| Protein inhibitor of activated STAT 2                                                               | PIAS2    | 696737    |
| Protein kinase C and casein kinase substrate in neurons 1                                           | PACSIN1  | 718624    |
| Protein kinase C, alpha                                                                             | PRKCA    | 718412    |
| Protein kinase C, gamma                                                                             | PRKCG    | 720263    |
| Protein kinase, AMP-activated, alpha 2 catalytic subunit                                            | PRKAA2   | 717703    |
| Protein kinase, AMP-activated, gamma 3 non-catalytic subunit                                        | PRKAG3   | 702782    |
| Protein kinase, camp-dependent, beta catalytic subunit                                              | PRKACB   | 709728    |
| Protein kinase, cgmp-dependent, type II                                                             | PRKG2    | 696308    |
| Protein phosphatase 1 regulatory subunit 12B                                                        | PPP1R12B | 705775    |
| Protein phosphatase 1 regulatory subunit 15A                                                        | PPP1R15A | 718350    |
| Protein phosphatase 1 regulatory subunit 16B                                                        | PPP1R16B | 693349    |
| Protein phosphatase 1 regulatory subunit 27                                                         | PPP1R27  | 714648    |
| Protein phosphatase 1, regulatory subunit 17                                                        | PPP1R17  | 694066    |
| Protein phosphatase 3, catalytic subunit, beta isozyme                                              | PPP3CB   | 706955    |
| Protein phosphatase 3, catalytic subunit, gamma isozyme                                             | PPP3CC   | 708233    |
| Protein phosphatase 4 catalytic subunit                                                             | PPP4C    | 708510    |
| Protein phosphatase, EF-hand calcium binding domain 2                                               | PPEF2    | 701103    |
| Protein S (alpha)                                                                                   | PROS1    | 694845    |
| Protein serine kinase H2                                                                            | PSKH2    | 693701    |
| Protein tyrosine kinase 2 beta                                                                      | PTK2B    | 712787    |
| Protein tyrosine phosphatase domain containing 1                                                    | PTPDC1   | 707878    |
| Protein tyrosine phosphatase type IVA, member 2                                                     | PTP4A2   | 706489    |
| Protein tyrosine phosphatase, non-receptor type 20                                                  | PTPN20   | 711276    |
| Protein tyrosine phosphatase, non-receptor type 23                                                  | PTPN23   | 711601    |
| Proteoglycan 2, bone marrow (natural killer cell activator, eosinophil granule major basic protein) | PRG2     | 100423552 |
| Proteoglycan 3                                                                                      | PRG3     | 706381    |
| Protocadherin 8                                                                                     | PCDH8    | 694442    |
| Protocadherin alpha 1                                                                               | PCDHA1   | 698493    |
| Protocadherin alpha 4                                                                               | PCDHA4   | 697990    |
| Protocadherin alpha 5                                                                               | PCDHA5   | 692083    |
| Protocadherin alpha 7                                                                               | PCDHA7   | 698370    |
| Protocadherin alpha subfamily C, 1                                                                  | PCDHAC1  | 699374    |
| Protocadherin beta 1                                                                                | PCDHB1   | 699508    |

|                                                                                            |          |           |
|--------------------------------------------------------------------------------------------|----------|-----------|
| Protocadherin beta 12                                                                      | PCDHB12  | 699044    |
| Protocadherin beta 13                                                                      | PCDHB13  | 700999    |
| Protocadherin beta 4                                                                       | PCDHB4   | 700373    |
| Protocadherin-related 15                                                                   | PCDH15   | 702413    |
| Psoriasis susceptibility 1 candidate 2                                                     | PSORS1C2 | 714607    |
| Purinergic receptor P2Y, G-protein coupled, 10                                             | P2RY10   | 707388    |
| Purinergic receptor P2Y, G-protein coupled, 11                                             | P2RY11   | 100533472 |
| Purinergic receptor P2Y, G-protein coupled, 12                                             | P2RY12   | 710036    |
| Purinergic receptor P2Y, G-protein coupled, 13                                             | P2RY13   | 106997048 |
| PYD and CARD domain containing                                                             | PYCARD   | 713563    |
| PYM homolog 1, exon junction complex associated factor                                     | PYM1     | 708148    |
| Pyridine nucleotide-disulphide oxidoreductase domain 2                                     | PYROXD2  | 707797    |
| Pyrimidineric receptor P2Y, G-protein coupled, 6                                           | P2RY6    | 718623    |
| Pyruvate dehydrogenase kinase, isozyme 2                                                   | PDK2     | 704169    |
| Pyruvate dehydrogenase phosphatase regulatory subunit                                      | PDPR     | 709861    |
| Quiescin sulfhydryl oxidase 1                                                              | QSOX1    | 718589    |
| RAB, member of RAS oncogene family-like 2B                                                 | RABL2B   | 716615    |
| RAB27B, member RAS oncogene family                                                         | RAB27B   | 694445    |
| RAB3C, member RAS oncogene family                                                          | RAB3C    | 709039    |
| RAB5B, member RAS oncogene family                                                          | RAB5B    | 708347    |
| RAB6A, member RAS oncogene family                                                          | RAB6A    | 718717    |
| RAB8B, member RAS oncogene family                                                          | RAB8B    | 705597    |
| Rabphilin 3A                                                                               | RPH3A    | 712197    |
| RAD9 checkpoint clamp component A                                                          | RAD9A    | 712345    |
| Ral gtpase activating protein, alpha subunit 1 (catalytic)                                 | RALGAPA1 | 695674    |
| Ral gtpase activating protein, beta subunit (non-catalytic)                                | RALGAPB  | 705742    |
| Ral guanine nucleotide dissociation stimulator-like 1                                      | RGL1     | 717554    |
| RALY heterogeneous nuclear ribonucleoprotein                                               | RALY     | 713317    |
| RAN binding protein 10                                                                     | RANBP10  | 700911    |
| Ran gtpase activating protein 1                                                            | RANGAP1  | 710698    |
| Ranbp-type and C3HC4-type zinc finger containing 1                                         | RBCK1    | 714692    |
| Rap guanine nucleotide exchange factor 2                                                   | RAPGEF2  | 704717    |
| Ras and Rab interactor 3                                                                   | RIN3     | 698125    |
| Ras association (ralgds/AF-6) domain family<br>(N-terminal) member 8                       | RASSF8   | 708284    |
| Ras homolog family member A                                                                | RHOA     | 706455    |
| Ras homolog family member C                                                                | RHOC     | 706034    |
| Ras homolog family member D                                                                | RHOD     | 712969    |
| Ras homolog family member J                                                                | RHOJ     | 705603    |
| Ras homolog family member V                                                                | RHOV     | 704675    |
| Ras-related C3 botulinum toxin substrate 2 (rho family,<br>small GTP binding protein Rac2) | RAC2     | 696709    |
| Ras-related GTP binding A                                                                  | RRAGA    | 100430224 |
| RBPI interacting and tubulin associated 1                                                  | RITA1    | 712837    |
| RCAN family member 3                                                                       | RCAN3    | 719315    |
| Receptor (chemosensory) transporter protein 1                                              | RTP1     | 708309    |
| Receptor (chemosensory) transporter protein 3                                              | RTP3     | 713050    |
| Receptor interacting serine/threonine kinase 3                                             | RIPK3    | 716138    |



|                                                           |          |           |
|-----------------------------------------------------------|----------|-----------|
| Receptor tyrosine kinase-like orphan receptor 2           | ROR2     | 715482    |
| Recq helicase-like                                        | RECQL    | 705871    |
| Regenerating islet-derived 1 beta                         | REG1B    | 711725    |
| Regulating synaptic membrane exocytosis 4                 | RIMS4    | 712194    |
| Regulator of G-protein signaling 10                       | RGS10    | 703125    |
| Regulator of G-protein signaling 11                       | RGS11    | 694588    |
| Regulator of G-protein signaling like 1                   | RGSL1    | 715693    |
| Regulatory factor X associated ankyrin containing protein | RFXANK   | 719706    |
| Regulatory factor X4                                      | RFX4     | 702824    |
| Regulatory factor X6                                      | RFX6     | 715469    |
| Relaxin 2                                                 | RLN2     | 693473    |
| Relaxin 3                                                 | RLN3     | 717577    |
| Relaxin/insulin-like family peptide receptor 3            | RXFP3    | 698115    |
| Relaxin/insulin-like family peptide receptor 4            | RXFP4    | 718025    |
| Replication protein A1                                    | RPA1     | 721272    |
| Replication protein A3                                    | RPA3     | 696248    |
| Reprimo-like                                              | RPRML    | 716801    |
| Resistin                                                  | RETN     | 708781    |
| Ret proto-oncogene                                        | RET      | 703466    |
| Retbindin                                                 | RTBDN    | 716766    |
| Retina and anterior neural fold homeobox                  | RAX      | 697100    |
| Retinal G protein coupled receptor                        | RGR      | 698258    |
| Retinaldehyde binding protein 1                           | RLBP1    | 699510    |
| Retinoic acid induced 14                                  | RAI14    | 698620    |
| Retinol dehydrogenase 5 (11-cis/9-cis)                    | RDH5     | 709644    |
| REX1, RNA exonuclease 1 homolog                           | REXO1    | 708931    |
| RFT1 homolog                                              | RFT1     | 694586    |
| Rh family, B glycoprotein                                 | RHBG     | 692069    |
| Rh family, C glycoprotein                                 | RHCG     | 664731    |
| Rh-associated glycoprotein                                | RHAG     | 574120    |
| Rho GDP dissociation inhibitor (GDI) beta                 | ARHGDIB  | 702320    |
| Rho gtpase activating protein 25                          | ARHGAP25 | 699828    |
| Rho gtpase activating protein 29                          | ARHGAP29 | 708896    |
| Rho gtpase activating protein 30                          | ARHGAP30 | 718236    |
| Rho gtpase activating protein 6                           | ARHGAP6  | 709978    |
| Rho gtpase activating protein 9                           | ARHGAP9  | 711684    |
| Rho guanine nucleotide exchange factor 1                  | ARHGEF1  | 722198    |
| Rho guanine nucleotide exchange factor 5                  | ARHGEF5  | 705891    |
| Rho/Rac guanine nucleotide exchange factor 2              | ARHGEF2  | 719369    |
| Rhomboid, veinlet-like 3 (Drosophila)                     | RHBDL3   | 713926    |
| Rhophilin associated tail protein 1                       | ROPN1    | 721050    |
| Rhophilin associated tail protein 1B                      | ROPN1B   | 716215    |
| Ribonuclease H2 subunit B                                 | RNASEH2B | 707995    |
| Ribonuclease H2 subunit C                                 | RNASEH2C | 700330    |
| Ribonuclease P/MRP 21kda subunit                          | RPP21    | 713056    |
| Ribonuclease T2                                           | RNASET2  | 706533    |
| Ribonuclease, rnase A family, 11 (non-active)             | RNASE11  | 703578    |
| Ribonuclease, rnase A family, 3                           | RNASE3   | 100425328 |

|                                                                |         |           |
|----------------------------------------------------------------|---------|-----------|
| Ribonuclease, rnase A family, 7                                | RNASE7  | 705600    |
| Ribonuclease, rnase A family, 9 (non-active)                   | RNASE9  | 703346    |
| Ribonucleoprotein, PTB-binding 1                               | RAVER1  | 715250    |
| Ribophorin II                                                  | RPN2    | 708971    |
| Ribosomal modification protein rimk-like family member A       | RIMKLA  | 699767    |
| Ribosomal protein l10a                                         | RPL10A  | 718783    |
| Ribosomal protein L17                                          | RPL17   | 698967    |
| Ribosomal protein L23                                          | RPL23   | 694719    |
| Ribosomal protein l23a                                         | RPL23A  | 710490    |
| Ribosomal protein L24                                          | RPL24   | 702381    |
| Ribosomal protein L29                                          | RPL29   | 698602    |
| Ribosomal protein L3 like                                      | RPL3L   | 693424    |
| Ribosomal protein L4                                           | RPL4    | 710590    |
| Ribosomal protein l7a                                          | RPL7A   | 722215    |
| Ribosomal protein L8                                           | RPL8    | 708535    |
| Ribosomal protein S10                                          | RPS10   | 718606    |
| Ribosomal protein S13                                          | RPS13   | 697513    |
| Ribosomal protein S14                                          | RPS14   | 710901    |
| Ribosomal protein S15                                          | RPS15   | 707241    |
| Ribosomal protein S16                                          | RPS16   | 697219    |
| Ribosomal protein S2                                           | RPS2    | 693615    |
| Ribosomal protein S27                                          | RPS27   | 106992520 |
| Ribosomal protein S28                                          | RPS28   | 707133    |
| Ribosomal protein S4, X-linked                                 | RPS4X   | 699397    |
| Ribosomal protein S5                                           | RPS5    | 711259    |
| Ribosomal protein S6 kinase, 90kda, polypeptide 4              | RPS6KA4 | 717574    |
| Ribosomal protein S7                                           | RPS7    | 721900    |
| Ribosomal protein S8                                           | RPS8    | 703957    |
| Ribosomal protein S9                                           | RPS9    | 694053    |
| Ribosomal protein, large, P0                                   | RPLP0   | 574363    |
| Ribosomal protein, large, P1                                   | RPLP1   | 695442    |
| Ribosomal protein, large, P2                                   | RPLP2   | 700698    |
| Ribosomal RNA processing 8, methyltransferase, homolog (yeast) | RRP8    | 712011    |
| Ring finger protein 133                                        | RNF133  | 694972    |
| Ring finger protein 152                                        | RNF152  | 699091    |
| Ring finger protein 168, E3 ubiquitin protein ligase           | RNF168  | 709903    |
| Ring finger protein 17                                         | RNF17   | 708198    |
| Ring finger protein 208                                        | RNF208  | 705563    |
| Ring finger protein 26                                         | RNF26   | 704755    |
| Ring finger protein 38                                         | RNF38   | 693346    |
| Ring finger protein 40, E3 ubiquitin protein ligase            | RNF40   | 713148    |
| Ring finger protein, transmembrane 1                           | RNFT1   | 712052    |
| RNA binding motif protein 18                                   | RBM18   | 698457    |
| RNA binding motif protein 19                                   | RBM19   | 715724    |
| RNA binding motif protein 42                                   | RBM42   | 709852    |
| RNA binding motif protein 45                                   | RBM45   | 702714    |

|                                                                                        |           |           |
|----------------------------------------------------------------------------------------|-----------|-----------|
| RNA binding motif protein 7                                                            | RBM7      | 695401    |
| RNA binding motif, single stranded interacting protein 1                               | RBMS1     | 703608    |
| RNA binding motif, single stranded interacting protein 2                               | RBMS2     | 713163    |
| RNA binding protein, fox-1 homolog (C. Elegans) 2                                      | RBFox2    | 693642    |
| RNA pseudouridylate synthase domain containing 3                                       | RPUSD3    | 700349    |
| RPGRIP1-like                                                                           | RPGRIP1L  | 697345    |
| RPTOR independent companion of MTOR, complex 2                                         | RICTOR    | 694915    |
| RRN3 homolog, RNA polymerase I transcription factor                                    | RRN3      | 713500    |
| R-spondin 2                                                                            | RSPO2     | 697376    |
| S100 calcium binding protein A8                                                        | S100A8    | 714740    |
| S100 calcium binding protein G                                                         | S100G     | 713702    |
| S100 calcium binding protein P                                                         | S100P     | 710510    |
| Saitohin                                                                               | STH       | 106994064 |
| SAM and SH3 domain containing 3                                                        | SASH3     | 702089    |
| SAMM50 sorting and assembly machinery component                                        | SAMM50    | 715675    |
| Sarcoglycan zeta                                                                       | SGCZ      | 100430472 |
| Sarcolipin                                                                             | SLN       | 100424360 |
| Schlafen like 1                                                                        | SLFNL1    | 695605    |
| Schwannomin interacting protein 1                                                      | SCHIP1    | 703321    |
| Sclerostin domain containing 1                                                         | SOSTDC1   | 709577    |
| SCP2 sterol-binding domain containing 1                                                | SCP2D1    | 698938    |
| Scratch family zinc finger 1                                                           | SCRT1     | 714311    |
| SEC11 homolog A, signal peptidase complex subunit                                      | SEC11A    | 695951    |
| Sec23 homolog A, COPII coat complex component                                          | SEC23A    | 698500    |
| SEC31 homolog A, COPII coat complex component                                          | SEC31A    | 693687    |
| Sec61 translocon alpha 2 subunit                                                       | SEC61A2   | 100427728 |
| Secernin 3                                                                             | SCRN3     | 698199    |
| SECIS binding protein 2-like                                                           | SECISBP2L | 714764    |
| Secretagogin, EF-hand calcium binding protein                                          | SCGN      | 694072    |
| Secretoglobin, family 3A, member 2                                                     | SCGB3A2   | 709138    |
| Secretogranin II                                                                       | SCG2      | 706499    |
| Secretogranin III                                                                      | SCG3      | 694089    |
| Secretory carrier membrane protein 2                                                   | SCAMP2    | 709720    |
| Selectin E                                                                             | SELE      | 701538    |
| Selenoprotein M                                                                        | SELM      | 718290    |
| Sema domain, immunoglobulin domain (Ig), short basic domain, secreted, (semaphorin) 3D | SEMA3D    | 707146    |
| Semaphorin 7A, GPI membrane anchor (John Milton Hagen blood group)                     | SEMA7A    | 702185    |
| Semenogelin I pseudogene                                                               | SEMG1P    | 100424776 |
| Sepiapterin reductase (7,8-dihydrobiopterin:NADP+ oxidoreductase)                      | SPR       | 705317    |
| Serine peptidase inhibitor, Kazal type 4                                               | SPINK4    | 702218    |
| Serine/threonine kinase 11 interacting protein                                         | STK11IP   | 704531    |
| Serine/threonine kinase 31                                                             | STK31     | 703886    |
| Serine/threonine kinase 38                                                             | STK38     | 719169    |
| Serine/threonine kinase 38 like                                                        | STK38L    | 711047    |
| Serologically defined colon cancer antigen 3                                           | SDCCAG3   | 721750    |

|                                                                                      |           |           |
|--------------------------------------------------------------------------------------|-----------|-----------|
| Serpin peptidase inhibitor, clade A (alpha-1 antiproteinase, antitrypsin), member 12 | SERPINA12 | 701708    |
| Serpin peptidase inhibitor, clade A (alpha-1 antiproteinase, antitrypsin), member 7  | SERPINA7  | 700439    |
| Serpin peptidase inhibitor, clade B (ovalbumin), member 7                            | SERPINB7  | 701671    |
| Serpin peptidase inhibitor, clade D (heparin cofactor), member 1                     | SERPIND1  | 696950    |
| Serrate, RNA effector molecule                                                       | SRRT      | 713235    |
| SET domain containing 4                                                              | SETD4     | 696003    |
| SFI1 centrin binding protein                                                         | SFI1      | 716833    |
| SH2 domain containing 1B                                                             | SH2D1B    | 720097    |
| SH2 domain containing 3C                                                             | SH2D3C    | 699706    |
| SH3 and cysteine rich domain                                                         | STAC      | 707350    |
| SH3 domain and tetratricopeptide repeats 2                                           | SH3TC2    | 709970    |
| SH3 domain containing 19                                                             | SH3D19    | 694606    |
| SH3-domain GRB2-like 3                                                               | SH3GL3    | 718542    |
| SHANK associated RH domain interactor                                                | SHARPIN   | 713534    |
| SHC (Src homology 2 domain containing) transforming protein 3                        | SHC3      | 574275    |
| Shugoshin-like 1 (S. Pombe)                                                          | SGOL1     | 698231    |
| Siah E3 ubiquitin protein ligase 1                                                   | SIAH1     | 716629    |
| Sialic acid binding Ig-like lectin 1, sialoadhesin                                   | SIGLEC1   | 717470    |
| Sialic acid binding Ig-like lectin 10                                                | SIGLEC10  | 719648    |
| Sialic acid binding Ig-like lectin 5                                                 | SIGLEC5   | 719730    |
| Sialic acid binding Ig-like lectin 9                                                 | SIGLEC9   | 719831    |
| Signal peptide peptidase like 2C                                                     | SPPL2C    | 717107    |
| Signal peptide, CUB domain, EGF-like 2                                               | SCUBE2    | 708152    |
| Signal recognition particle 68kda                                                    | SRP68     | 705568    |
| Signal sequence receptor, delta                                                      | SSR4      | 697266    |
| Signal transducer and activator of transcription 2                                   | STAT2     | 712694    |
| Signal transducer and activator of transcription 4                                   | STAT4     | 693854    |
| Signal transducer and activator of transcription 5A                                  | STAT5A    | 574129    |
| Signal transducer and activator of transcription 6, interleukin-4 induced            | STAT6     | 714159    |
| Signal transducing adaptor family member 1                                           | STAP1     | 711834    |
| Sin3A associated protein 18kda                                                       | SAP18     | 703078    |
| Sin3A associated protein 25kda                                                       | SAP25     | 106997576 |
| Single stranded DNA binding protein 4                                                | SSBP4     | 719496    |
| Single-pass membrane protein with aspartate-rich tail 1                              | SMDT1     | 709741    |
| SIX homeobox 1                                                                       | SIX1      | 703696    |
| SKI-like proto-oncogene                                                              | SKIL      | 696680    |
| SLAM family member 6                                                                 | SLAMF6    | 719728    |
| SLAM family member 8                                                                 | SLAMF8    | 719494    |
| SLIT and NTRK like family member 1                                                   | SLITRK1   | 699217    |
| SLIT and NTRK like family member 2                                                   | SLITRK2   | 699766    |
| SLIT and NTRK like family member 4                                                   | SLITRK4   | 698270    |
| SLP adaptor and CSK interacting membrane protein                                     | SCIMP     | 721635    |

|                                                                                              |          |        |
|----------------------------------------------------------------------------------------------|----------|--------|
| SLX1 homolog A, structure-specific endonuclease subunit                                      | SLX1A    | 709225 |
| SMAD family member 2                                                                         | SMAD2    | 697581 |
| Small integral membrane protein 12                                                           | SMIM12   | 712003 |
| Small integral membrane protein 13                                                           | SMIM13   | 703387 |
| Small integral membrane protein 19                                                           | SMIM19   | 705371 |
| Small nuclear ribonucleoprotein polypeptides B and B1                                        | SNRPB    | 716578 |
| Small nuclear ribonucleoprotein, U4/U6.U5 27kda subunit                                      | SNRNP27  | 708670 |
| Small proline-rich protein 1B                                                                | SPRR1B   | 613022 |
| Small proline-rich protein 3                                                                 | SPRR3    | 713857 |
| Small ubiquitin-like modifier 1                                                              | SUMO1    | 703644 |
| Small ubiquitin-like modifier 2                                                              | SUMO2    | 705512 |
| SMYD family member 5                                                                         | SMYD5    | 705926 |
| SNF related kinase                                                                           | SNRK     | 715803 |
| Sodium channel, non voltage gated 1 beta subunit                                             | SCNN1B   | 700093 |
| Sodium channel, voltage gated, type I alpha subunit                                          | SCN1A    | 704086 |
| Sodium channel, voltage gated, type X alpha subunit                                          | SCN10A   | 694962 |
| Solute carrier family 10 member 4                                                            | SLC10A4  | 705961 |
| Solute carrier family 12 (potassium/chloride transporter), member 5                          | SLC12A5  | 707974 |
| Solute carrier family 12 (sodium/potassium/chloride transporter), member 1                   | SLC12A1  | 714289 |
| Solute carrier family 16 (aromatic amino acid transporter), member 10                        | SLC16A10 | 696132 |
| Solute carrier family 16 member 13                                                           | SLC16A13 | 713985 |
| Solute carrier family 16, member 6                                                           | SLC16A6  | 718903 |
| Solute carrier family 17 (vesicular glutamate transporter), member 7                         | SLC17A7  | 574349 |
| Solute carrier family 18 (vesicular acetylcholine transporter), member 3                     | SLC18A3  | 710053 |
| Solute carrier family 2 (facilitated glucose transporter), member 13                         | SLC2A13  | 697822 |
| Solute carrier family 2 (facilitated glucose transporter), member 2                          | SLC2A2   | 695538 |
| Solute carrier family 20 (phosphate transporter), member 2                                   | SLC20A2  | 705242 |
| Solute carrier family 22 (organic anion transporter), member 6                               | SLC22A6  | 718377 |
| Solute carrier family 22 (organic anion/urate transporter), member 11                        | SLC22A11 | 699212 |
| Solute carrier family 22 (organic anion/urate transporter), member 12                        | SLC22A12 | 717530 |
| Solute carrier family 22 member 14                                                           | SLC22A14 | 696120 |
| Solute carrier family 22 member 15                                                           | SLC22A15 | 710102 |
| Solute carrier family 24 (sodium/potassium/calcium exchanger), member 2                      | SLC24A2  | 711896 |
| Solute carrier family 25 (aspartate/glutamate carrier), member 12                            | SLC25A12 | 695173 |
| Solute carrier family 25 (mitochondrial carrier; adenine nucleotide translocator), member 31 | SLC25A31 | 710042 |
| Solute carrier family 25 (mitochondrial carrier;                                             | SLC25A1  | 719075 |

|                                                                                   |          |           |
|-----------------------------------------------------------------------------------|----------|-----------|
| citrate transporter), member 1                                                    |          |           |
| Solute carrier family 25 (mitochondrial carrier; ornithine transporter) member 2  | SLC25A2  | 701587    |
| Solute carrier family 25 (mitochondrial carrier; oxoglutarate carrier), member 11 | SLC25A11 | 710569    |
| Solute carrier family 25 (mitochondrial iron transporter), member 37              | SLC25A37 | 710518    |
| Solute carrier family 25 (S-adenosylmethionine carrier), member 26                | SLC25A26 | 697960    |
| Solute carrier family 25 member 40                                                | SLC25A40 | 705584    |
| Solute carrier family 26 (anion exchanger), member 8                              | SLC26A8  | 719049    |
| Solute carrier family 26 (anion exchanger), member 9                              | SLC26A9  | 696461    |
| Solute carrier family 30 (zinc transporter), member 8                             | SLC30A8  | 701127    |
| Solute carrier family 34 (type II sodium/phosphate cotransporter), member 2       | SLC34A2  | 694217    |
| Solute carrier family 35 (UDP-galactose transporter), member A2                   | SLC35A2  | 711587    |
| Solute carrier family 35 (UDP-glca/UDP-galnac transporter), member D1             | SLC35D1  | 700175    |
| Solute carrier family 35 member A5                                                | SLC35A5  | 708401    |
| Solute carrier family 35 member E4                                                | SLC35E4  | 716119    |
| Solute carrier family 36 member 3                                                 | SLC36A3  | 713439    |
| Solute carrier family 37 (glucose-6-phosphate transporter), member 2              | SLC37A2  | 712841    |
| Solute carrier family 38 member 4                                                 | SLC38A4  | 702354    |
| Solute carrier family 38 member 7                                                 | SLC38A7  | 707671    |
| Solute carrier family 38 member 9                                                 | SLC38A9  | 706752    |
| Solute carrier family 39 (zinc transporter), member 12                            | SLC39A12 | 701128    |
| Solute carrier family 39 (zinc transporter), member 3                             | SLC39A3  | 711564    |
| Solute carrier family 4 (anion exchanger), member 1 (Diego blood group)           | SLC4A1   | 100427616 |
| Solute carrier family 4 (anion exchanger), member 2                               | SLC4A2   | 713966    |
| Solute carrier family 4, sodium bicarbonate transporter, member 10                | SLC4A10  | 705263    |
| Solute carrier family 4, sodium borate transporter, member 11                     | SLC4A11  | 718393    |
| Solute carrier family 41 (magnesium transporter), member 1                        | SLC41A1  | 696944    |
| Solute carrier family 44 member 4                                                 | SLC44A4  | 715779    |
| Solute carrier family 44 member 5                                                 | SLC44A5  | 704729    |
| Solute carrier family 45 member 2                                                 | SLC45A2  | 698246    |
| Solute carrier family 5 (sodium/glucose cotransporter), member 1                  | SLC5A1   | 717070    |
| Solute carrier family 5 (sodium/multivitamin and iodide cotransporter), member 6  | SLC5A6   | 699074    |
| Solute carrier family 5 (sodium/myo-inositol cotransporter), member 3             | SLC5A3   | 698346    |
| Solute carrier family 5 (sodium/sugar cotransporter),                             | SLC5A10  | 709069    |

|                                                                                   |         |           |
|-----------------------------------------------------------------------------------|---------|-----------|
| member 10                                                                         |         |           |
| Solute carrier family 5 (sodium/sugar cotransporter), member 9                    | SLC5A9  | 713064    |
| Solute carrier family 6 (amino acid transporter), member 14                       | SLC6A14 | 709598    |
| Solute carrier family 6 (neurotransmitter transporter), member 1                  | SLC6A1  | 696617    |
| Solute carrier family 6 (neurotransmitter transporter), member 11                 | SLC6A11 | 696741    |
| Solute carrier family 6 (neurotransmitter transporter), member 2                  | SLC6A2  | 613238    |
| Solute carrier family 6 (neurotransmitter transporter), member 3                  | SLC6A3  | 574143    |
| Solute carrier family 6 (neurotransmitter transporter), member 7                  | SLC6A7  | 711915    |
| Solute carrier family 6 (neutral amino acid transporter), member 19               | SLC6A19 | 100424680 |
| Solute carrier family 7 (anionic amino acid transporter), member 13               | SLC7A13 | 693964    |
| Solute carrier family 7 member 4                                                  | SLC7A4  | 695731    |
| Solute carrier family 8 (sodium/calcium exchanger), member 3                      | SLC8A3  | 713061    |
| Solute carrier family 9, subfamily A (NHE9, cation proton antiporter 9), member 9 | SLC9A9  | 713935    |
| Solute carrier organic anion transporter family member 1B1                        | SLCO1B1 | 705308    |
| Solute carrier organic anion transporter family member 1B3                        | SLCO1B3 | 574354    |
| Solute carrier organic anion transporter family member 1C1                        | SLCO1C1 | 704740    |
| Solute carrier organic anion transporter family member 2B1                        | SLCO2B1 | 694829    |
| Solute carrier organic anion transporter family member 5A1                        | SLCO5A1 | 705846    |
| Solute carrier organic anion transporter family member 6A1                        | SLCO6A1 | 707421    |
| Somatostatin receptor 2                                                           | SSTR2   | 695526    |
| Somatostatin receptor 3                                                           | SSTR3   | 696585    |
| Sonic hedgehog                                                                    | SHH     | 716553    |
| Sorbin and SH3 domain containing 3                                                | SORBS3  | 716198    |
| Sortilin-related VPS10 domain containing receptor 1                               | SORCS1  | 693969    |
| Sorting nexin 12                                                                  | SNX12   | 696408    |
| Sorting nexin 13                                                                  | SNX13   | 714019    |
| Sorting nexin 14                                                                  | SNX14   | 696632    |
| Sorting nexin 22                                                                  | SNX22   | 706850    |
| Sorting nexin 33                                                                  | SNX33   | 706309    |
| Sorting nexin 4                                                                   | SNX4    | 716049    |
| SP140 nuclear body protein                                                        | SP140   | 710925    |
| Sp2 transcription factor                                                          | SP2     | 694834    |
| Sp4 transcription factor                                                          | SP4     | 712174    |
| Spalt-like transcription factor 4                                                 | SALL4   | 700309    |
| SPARC like 1                                                                      | SPARCL1 | 701468    |
| SPARC related modular calcium binding 1                                           | SMOC1   | 712994    |
| Spectrin repeat containing, nuclear envelope family member 3                      | SYNE3   | 710721    |

|                                                                                              |          |        |
|----------------------------------------------------------------------------------------------|----------|--------|
| Spectrin repeat containing, nuclear envelope family member 4                                 | SYNE4    | 711904 |
| Spectrin, beta, non-erythrocytic 1                                                           | SPTBN1   | 716794 |
| Sperm acrosome associated 1                                                                  | SPACA1   | 699611 |
| Sperm acrosome associated 3                                                                  | SPACA3   | 714491 |
| Sperm adhesion molecule 1 (PH-20 hyaluronidase, zona pellucida binding)                      | SPAM1    | 696249 |
| Sperm associated antigen 11B                                                                 | SPAG11B  | 641436 |
| Sperm equatorial segment protein 1                                                           | SPESP1   | 694614 |
| Sperm specific antigen 2                                                                     | SSFA2    | 705181 |
| Spermatid associated                                                                         | SPERT    | 707821 |
| Spermatogenesis and centriole associated 1-like                                              | SPATC1L  | 709320 |
| Spermatogenesis associated 19                                                                | SPATA19  | 693524 |
| Spermatogenesis associated 20                                                                | SPATA20  | 703313 |
| Spermatogenesis associated 25                                                                | SPATA25  | 709097 |
| Spermatogenesis associated 4                                                                 | SPATA4   | 641336 |
| Spermatogenesis associated 6                                                                 | SPATA6   | 710827 |
| Spermatogenesis associated 6-like                                                            | SPATA6L  | 695067 |
| Spermatogenesis associated 9                                                                 | SPATA9   | 698748 |
| Spermatogenesis associated, serine-rich 1                                                    | SPATS1   | 703218 |
| Spermatogenic leucine zipper 1                                                               | SPZ1     | 710676 |
| Spermidine synthase                                                                          | SRM      | 714028 |
| Spermidine/spermine N1-acetyltransferase family member 2                                     | SAT2     | 716044 |
| Sphingomyelin phosphodiesterase 1                                                            | SMPD1    | 711248 |
| Sphingosine kinase 2                                                                         | SPHK2    | 718088 |
| Sphingosine-1-phosphate receptor 2                                                           | S1PR2    | 712143 |
| Sphingosine-1-phosphate receptor 4                                                           | S1PR4    | 712637 |
| Spindle and kinetochore associated complex subunit 2                                         | SKA2     | 711092 |
| SPO11 meiotic protein covalently bound to DSB                                                | SPO11    | 696836 |
| SPT16 homolog, facilitates chromatin remodeling subunit                                      | SUPT16H  | 708066 |
| SRC proto-oncogene, non-receptor tyrosine kinase                                             | SRC      | 701057 |
| Src-related kinase lacking C-terminal regulatory tyrosine and N-terminal myristylation sites | SRMS     | 719587 |
| SREK1-interacting protein 1                                                                  | SREK1IP1 | 695436 |
| SRY-box 21                                                                                   | SOX21    | 695074 |
| SRY-box 3                                                                                    | SOX3     | 696412 |
| ST3 beta-galactoside alpha-2,3-sialyltransferase 4                                           | ST3GAL4  | 717792 |
| ST6 beta-galactosamide alpha-2,6-sialyltransferase 1                                         | ST6GAL1  | 708113 |
| ST8 alpha-N-acetyl-neuraminide alpha-2,8-sialyltransferase 6                                 | ST8SIA6  | 700128 |
| Stannin                                                                                      | SNN      | 711909 |
| Star related lipid transfer domain containing 13                                             | STARD13  | 714104 |
| Star related lipid transfer domain containing 3                                              | STARD3   | 697212 |
| Star related lipid transfer domain containing 5                                              | STARD5   | 713308 |
| Star related lipid transfer domain containing 6                                              | STARD6   | 694051 |
| STEAP4 metalloreductase                                                                      | STEAP4   | 705096 |
| Sterile alpha motif domain containing 4A                                                     | SAMD4A   | 695336 |
| Sterile alpha motif domain containing 7                                                      | SAMD7    | 697223 |
| Steroid receptor RNA activator 1                                                             | SRA1     | 698169 |
| Sterol O-acyltransferase 2                                                                   | SOAT2    | 701171 |



|                                                                                   |          |           |
|-----------------------------------------------------------------------------------|----------|-----------|
| Stimulated by retinoic acid 8                                                     | STRA8    | 713651    |
| Stomatin like 2                                                                   | STOML2   | 698458    |
| Stomatin like 3                                                                   | STOML3   | 696490    |
| Stonin 1                                                                          | STON1    | 106992944 |
| Storkhead box 2                                                                   | STOX2    | 693692    |
| Stratifin                                                                         | SFN      | 715055    |
| Stress induced phosphoprotein 1                                                   | STIP1    | 717926    |
| Striatin                                                                          | STRN     | 708491    |
| Sulfiredoxin 1                                                                    | SRXN1    | 714997    |
| Sulfotransferase family 1B member 1                                               | SULT1B1  | 708638    |
| SUMO1/sentrin specific peptidase 5                                                | SEN5     | 710223    |
| SUMO1/sentrin specific peptidase 7                                                | SEN7     | 701453    |
| Superoxide dismutase 3, extracellular                                             | SOD3     | 715931    |
| Suppression of tumorigenicity 13 (colon carcinoma)<br>(Hsp70 interacting protein) | ST13     | 705664    |
| Suppression of tumorigenicity 18, zinc finger                                     | ST18     | 709973    |
| Suppression of tumorigenicity 7                                                   | ST7      | 704776    |
| Surfactant associated 2                                                           | SFTA2    | 714397    |
| Surfactant protein C                                                              | SFTPC    | 707696    |
| Surfactant protein D                                                              | SFTPD    | 678657    |
| SURP and G-patch domain containing 1                                              | SUGP1    | 719772    |
| Sushi domain containing 6                                                         | SUSD6    | 712719    |
| SWAP switching B-cell complex 70kda subunit                                       | SWAP70   | 703651    |
| Synapsin III                                                                      | SYN3     | 100430216 |
| Synaptogyrin 1                                                                    | SYNGR1   | 100427480 |
| Synaptonemal complex protein 1                                                    | SYCP1    | 709189    |
| Synaptophysin                                                                     | SYP      | 715739    |
| Synaptosome associated protein 91kda                                              | SNAP91   | 695216    |
| Synaptotagmin 14                                                                  | SYT14    | 717383    |
| Synaptotagmin 16                                                                  | SYT16    | 705114    |
| Synaptotagmin 6                                                                   | SYT6     | 708175    |
| Synaptotagmin like 4                                                              | SYTL4    | 700889    |
| Synaptotagmin VII                                                                 | SYT7     | 722368    |
| Syndecan 3                                                                        | SDC3     | 704374    |
| Synergin, gamma                                                                   | SYNRG    | 717750    |
| Synovial sarcoma translocation gene on chromosome 18-like 2                       | SS18L2   | 716387    |
| Syntaxin 11                                                                       | STX11    | 699733    |
| Syntaxin binding protein 1                                                        | STXBP1   | 707185    |
| Syntrophin, gamma 1                                                               | SNTG1    | 709244    |
| Tachykinin receptor 1                                                             | TACR1    | 653008    |
| Tankyrase 1 binding protein 1                                                     | TNKS1BP1 | 704825    |
| TAO kinase 2                                                                      | TAOK2    | 707777    |
| TAP binding protein (tapasin)                                                     | TAPBP    | 718235    |
| Target of myb1 like 2 membrane trafficking protein                                | TOM1L2   | 699471    |
| Taste 1 receptor member 2                                                         | TAS1R2   | 714666    |
| Taste 2 receptor member 13                                                        | TAS2R13  | 718046    |
| Taste 2 receptor member 14                                                        | TAS2R14  | 718111    |
| Taste 2 receptor member 16                                                        | TAS2R16  | 695211    |

|                                                             |          |        |
|-------------------------------------------------------------|----------|--------|
| Taste 2 receptor member 3                                   | TAS2R3   | 694595 |
| Taste 2 receptor member 39                                  | TAS2R39  | 705958 |
| Taste 2 receptor member 4                                   | TAS2R4   | 694737 |
| Taste 2 receptor member 42                                  | TAS2R42  | 695053 |
| Taste 2 receptor member 5                                   | TAS2R5   | 694858 |
| Taste 2 receptor member 60                                  | TAS2R60  | 706742 |
| Taste 2 receptor member 7                                   | TAS2R7   | 717909 |
| Taste 2 receptor member 9                                   | TAS2R9   | 717940 |
| TATA-box binding protein associated factor 2                | TAF2     | 702411 |
| TATA-box binding protein associated factor 5                | TAF5     | 714558 |
| TATA-box binding protein like 2                             | TBPL2    | 697371 |
| Tax1 (human T-cell leukemia virus type I) binding protein 3 | TAX1BP3  | 706829 |
| TBC1 domain family member 17                                | TBC1D17  | 719093 |
| TBC1 domain family member 19                                | TBC1D19  | 694865 |
| TBC1 domain family member 21                                | TBC1D21  | 700124 |
| TBK1 binding protein 1                                      | TBKBP1   | 693913 |
| T-box 15                                                    | TBX15    | 712254 |
| T-box 21                                                    | TBX21    | 694044 |
| T-box 22                                                    | TBX22    | 708338 |
| T-box 4                                                     | TBX4     | 712702 |
| T-cell leukemia homeobox 2                                  | TLX2     | 709649 |
| TCF3 (E2A) fusion partner (in childhood Leukemia)           | TFPT     | 720296 |
| T-complex 10-like                                           | TCP10L   | 700847 |
| T-complex 11, testis-specific                               | TCP11    | 718695 |
| T-complex 11, testis-specific-like 1                        | TCP11L1  | 694899 |
| Tctex1 domain containing 1                                  | TCTEX1D1 | 699673 |
| Teashirt zinc finger homeobox 1                             | TSHZ1    | 703018 |
| TEK tyrosine kinase, endothelial                            | TEK      | 707455 |
| TELO2 interacting protein 2                                 | TTI2     | 696776 |
| Telomeric repeat binding factor 2, interacting protein      | TERF2IP  | 712149 |
| Teneurin transmembrane protein 1                            | TENM1    | 699897 |
| TERF1 (TRF1)-interacting nuclear factor 2                   | TINF2    | 715812 |
| Testis expressed 13A                                        | TEX13A   | 699896 |
| Testis expressed 26                                         | TEX26    | 713363 |
| Testis expressed 28                                         | TEX28    | 699141 |
| Testis expressed 30                                         | TEX30    | 701917 |
| Testis expressed 35                                         | TEX35    | 717255 |
| Testis expressed 37                                         | TEX37    | 699461 |
| Testis expressed 43                                         | TEX43    | 703228 |
| Testis-specific serine kinase 1B                            | TSSK1B   | 694352 |
| Testis-specific serine kinase 3                             | TSSK3    | 708182 |
| Testis-specific serine kinase substrate                     | TSKS     | 719028 |
| Tetraspanin 18                                              | TSPAN18  | 715506 |
| Tetraspanin 32                                              | TSPAN32  | 704862 |
| Tetratricopeptide repeat domain 1                           | TTC1     | 695225 |
| Tetratricopeptide repeat domain 14                          | TTC14    | 710895 |
| Tetratricopeptide repeat domain 21A                         | TTC21A   | 694904 |
| Tetratricopeptide repeat domain 23                          | TTC23    | 708530 |

|                                                                               |          |           |
|-------------------------------------------------------------------------------|----------|-----------|
| Tetratricopeptide repeat domain 7B                                            | TTC7B    | 696029    |
| TGF-beta activated kinase 1/MAP3K7 binding protein 1                          | TAB1     | 703409    |
| THAP domain containing 7                                                      | THAP7    | 696208    |
| Thioredoxin domain containing 17                                              | TXNDC17  | 712910    |
| Thioredoxin domain containing 9                                               | TXNDC9   | 709303    |
| Thioredoxin-related transmembrane protein 1                                   | TMX1     | 707057    |
| THO complex 3                                                                 | THOC3    | 695561    |
| THO complex 5                                                                 | THOC5    | 714842    |
| THO complex 6                                                                 | THOC6    | 700217    |
| Thrombospondin type 1 domain containing 1                                     | THSD1    | 100430744 |
| Thy-1 cell surface antigen                                                    | THY1     | 705321    |
| Thymidine phosphorylase                                                       | TYMP     | 716161    |
| Thymosin beta 4, X-linked                                                     | TMSB4X   | 710959    |
| Thymus, brain and testes associated                                           | TBATA    | 710055    |
| Thyroid hormone receptor associated protein 3                                 | THRAP3   | 713033    |
| Thyroid hormone receptor, beta                                                | THRB     | 699969    |
| Thyroid stimulating hormone receptor                                          | TSHR     | 574251    |
| Thyrotropin-releasing hormone degrading enzyme                                | TRHDE    | 717653    |
| Thyrotropin-releasing hormone receptor                                        | TRHR     | 698511    |
| TNF alpha induced protein 6                                                   | TNFAIP6  | 694699    |
| TNF receptor associated factor 6                                              | TRAF6    | 716907    |
| Tocopherol (alpha) transfer protein                                           | TTPA     | 700876    |
| Toll-like receptor 4                                                          | TLR4     | 574360    |
| Toll-like receptor 7                                                          | TLR7     | 574291    |
| Toll-like receptor adaptor molecule 1                                         | TICAM1   | 574294    |
| Topoisomerase (DNA) I                                                         | TOP1     | 697300    |
| Topoisomerase (DNA) III beta                                                  | TOP3B    | 698317    |
| Torsin A interacting protein 2                                                | TOR1AIP2 | 716691    |
| Trace amine associated receptor 1                                             | TAAR1    | 708944    |
| Trace amine associated receptor 5                                             | TAAR5    | 709325    |
| Trace amine associated receptor 6                                             | TAAR6    | 709418    |
| TRAF3 interacting protein 3                                                   | TRAF3IP3 | 712895    |
| Transcription elongation factor A (SII), 2                                    | TCEA2    | 694026    |
| Transcription elongation factor A (SII)-like 1                                | TCEAL1   | 696826    |
| Transcription elongation factor A (SII)-like 4                                | TCEAL4   | 696453    |
| Transcription factor 15 (basic helix-loop-helix)                              | TCF15    | 716916    |
| Transcription factor 21                                                       | TCF21    | 707680    |
| Transcription factor 7-like 1 (T-cell specific, HMG-box)                      | TCF7L1   | 694560    |
| Transcription factor AP-2 delta (activating enhancer binding protein 2 delta) | TFAP2D   | 707582    |
| Transcription factor Dp family member 3                                       | TFDP3    | 706557    |
| Transcription factor EC                                                       | TFEC     | 704124    |
| Transcriptional adaptor 3                                                     | TADA3    | 700090    |
| Transducin (beta)-like 1 X-linked receptor 1                                  | TBL1XR1  | 712740    |
| Transducin like enhancer of split 3                                           | TLE3     | 698046    |
| Transforming growth factor beta 1 induced transcript 1                        | TGFB1I1  | 714172    |
| Transforming growth factor beta receptor associated protein 1                 | TGFBRAP1 | 713102    |
| Transforming, acidic coiled-coil containing protein 3                         | TACC3    | 712898    |

|                                                                    |           |           |
|--------------------------------------------------------------------|-----------|-----------|
| Transglutaminase 3                                                 | TGM3      | 716498    |
| Transglutaminase 5                                                 | TGM5      | 712605    |
| Transient receptor potential cation channel, subfamily C, member 3 | TRPC3     | 707586    |
| Transient receptor potential cation channel, subfamily C, member 7 | TRPC7     | 712863    |
| Transient receptor potential cation channel, subfamily M, member 3 | TRPM3     | 702898    |
| Transient receptor potential cation channel, subfamily V, member 5 | TRPV5     | 705218    |
| Transketolase-like 1                                               | TKTL1     | 699278    |
| Translocase of inner mitochondrial membrane 10 homolog B (yeast)   | TIMM10B   | 711085    |
| Translocase of inner mitochondrial membrane 17 homolog B (yeast)   | TIMM17B   | 714895    |
| Translocase of outer mitochondrial membrane 22 homolog (yeast)     | TOMM22    | 701286    |
| Transmembrane (C-terminal) protease, serine 12                     | TMPRSS12  | 693778    |
| Transmembrane 4 L six family member 5                              | TM4SF5    | 709844    |
| Transmembrane 6 superfamily member 2                               | TM6SF2    | 719756    |
| Transmembrane 9 superfamily protein member 4                       | TM9SF4    | 712260    |
| Transmembrane and immunoglobulin domain containing 3               | TMIGD3    | 104564312 |
| Transmembrane phosphoinositide 3-phosphatase and tensin homolog 2  | TPTE2     | 704870    |
| Transmembrane protease, serine 11D                                 | TMPRSS11D | 711510    |
| Transmembrane protease, serine 13                                  | TMPRSS13  | 698586    |
| Transmembrane protease, serine 4                                   | TMPRSS4   | 704604    |
| Transmembrane protease, serine 6                                   | TMPRSS6   | 696094    |
| Transmembrane protein 104                                          | TMEM104   | 698592    |
| Transmembrane protein 11                                           | TMEM11    | 704970    |
| Transmembrane protein 115                                          | TMEM115   | 702164    |
| Transmembrane protein 121                                          | TMEM121   | 700005    |
| Transmembrane protein 123                                          | TMEM123   | 702833    |
| Transmembrane protein 135                                          | TMEM135   | 704963    |
| Transmembrane protein 138                                          | TMEM138   | 693905    |
| Transmembrane protein 145                                          | TMEM145   | 709268    |
| Transmembrane protein 150A                                         | TMEM150A  | 696101    |
| Transmembrane protein 156                                          | TMEM156   | 698617    |
| Transmembrane protein 160                                          | TMEM160   | 716996    |
| Transmembrane protein 163                                          | TMEM163   | 709015    |
| Transmembrane protein 174                                          | TMEM174   | 703111    |
| Transmembrane protein 179B                                         | TMEM179B  | 718518    |
| Transmembrane protein 183A                                         | TMEM183A  | 704195    |
| Transmembrane protein 19                                           | TMEM19    | 718700    |
| Transmembrane protein 205                                          | TMEM205   | 714330    |
| Transmembrane protein 248                                          | TMEM248   | 695654    |
| Transmembrane protein 37                                           | TMEM37    | 695060    |
| Transmembrane protein 45B                                          | TMEM45B   | 718735    |

|                                                       |           |           |
|-------------------------------------------------------|-----------|-----------|
| Transmembrane protein 5                               | TMEM5     | 717102    |
| Transmembrane protein 55A                             | TMEM55A   | 696779    |
| Transmembrane protein 55B                             | TMEM55B   | 100428000 |
| Transmembrane protein 60                              | TMEM60    | 693679    |
| Transmembrane protein 74                              | TMEM74    | 698257    |
| Trefoil factor 2                                      | TFF2      | 714550    |
| Tribbles pseudokinase 3                               | TRIB3     | 714636    |
| Triggering receptor expressed on myeloid cells like 1 | TREML1    | 719732    |
| Tripartite motif containing 14                        | TRIM14    | 715418    |
| Tripartite motif containing 29                        | TRIM29    | 705796    |
| Tripartite motif containing 33                        | TRIM33    | 710600    |
| Tripartite motif containing 40                        | TRIM40    | 100427928 |
| Tripartite motif containing 42                        | TRIM42    | 715465    |
| Tripartite motif containing 62                        | TRIM62    | 709927    |
| Tripartite motif containing 67                        | TRIM67    | 713730    |
| Tripartite motif containing 69                        | TRIM69    | 712505    |
| Tripartite motif containing 7                         | TRIM7     | 708324    |
| Tripartite motif family like 1                        | TRIML1    | 698114    |
| TRK-fused gene                                        | TFG       | 700972    |
| Trophoblast glycoprotein                              | TPBG      | 693944    |
| Tropomyosin 2 (beta)                                  | TPM2      | 696604    |
| Tropomyosin 3                                         | TPM3      | 716336    |
| Troponin T type 2 (cardiac)                           | TNNT2     | 709882    |
| Trub pseudouridine (psi) synthase family member 2     | TRUB2     | 717619    |
| Tryptase gamma 1                                      | TPSG1     | 100425752 |
| Tryptophan hydroxylase 2                              | TPH2      | 664730    |
| Tryptophanyl trna synthetase 2, mitochondrial         | WARS2     | 712332    |
| TSPY-like 6                                           | TSPYL6    | 716697    |
| TSSK6 activating co-chaperone                         | TSACC     | 719490    |
| Tubulin alpha 3c                                      | TUBA3C    | 707215    |
| Tubulin alpha 4a                                      | TUBA4A    | 702583    |
| Tubulin alpha like 3                                  | TUBAL3    | 722506    |
| Tubulin beta 3 class III                              | TUBB3     | 699231    |
| Tubulin beta class I                                  | TUBB      | 574113    |
| Tubulin folding cofactor E-like                       | TBCEL     | 706506    |
| Tubulointerstitial nephritis antigen-like 1           | TINAGL1   | 705660    |
| Tudor domain containing 5                             | TDRD5     | 716831    |
| Tumor necrosis factor receptor superfamily member 13C | TNFRSF13C | 712577    |
| Tumor necrosis factor receptor superfamily member 17  | TNFRSF17  | 712212    |
| Tumor necrosis factor receptor superfamily member 25  | TNFRSF25  | 703744    |
| Tumor necrosis factor superfamily member 8            | TNFSF8    | 702944    |
| Tumor protein p53 inducible nuclear protein 2         | TP53INP2  | 707113    |
| Tumor protein, translationally-controlled 1           | TPT1      | 702155    |
| Twist family bhlh transcription factor 2              | TWIST2    | 697078    |
| TXK tyrosine kinase                                   | TXK       | 705104    |
| Tyrosinase-related protein 1                          | TYRP1     | 714646    |
| Tyrosine kinase, non-receptor, 1                      | TNK1      | 715180    |
| UBA domain containing 2                               | UBAC2     | 703484    |

|                                                                    |           |           |
|--------------------------------------------------------------------|-----------|-----------|
| Ubiquitin A-52 residue ribosomal protein fusion product 1          | UBA52     | 720243    |
| Ubiquitin B                                                        | UBB       | 696110    |
| Ubiquitin conjugating enzyme E2 variant 1                          | UBE2V1    | 100425552 |
| Ubiquitin conjugating enzyme E2O                                   | UBE2O     | 710529    |
| Ubiquitin domain containing 2                                      | UBTD2     | 709455    |
| Ubiquitin family domain containing 1                               | UBFD1     | 700601    |
| Ubiquitin like 4B                                                  | UBL4B     | 701055    |
| Ubiquitin like 5                                                   | UBL5      | 711015    |
| Ubiquitin like 7                                                   | UBL7      | 702305    |
| Ubiquitin protein ligase E3D                                       | UBE3D     | 694910    |
| Ubiquitin related modifier 1                                       | URM1      | 722618    |
| Ubiquitin specific peptidase 10                                    | USP10     | 718471    |
| Ubiquitin specific peptidase 11                                    | USP11     | 706555    |
| Ubiquitin specific peptidase 2                                     | USP2      | 705191    |
| Ubiquitin specific peptidase 20                                    | USP20     | 716505    |
| Ubiquitin specific peptidase 21                                    | USP21     | 719894    |
| Ubiquitin specific peptidase 26                                    | USP26     | 706435    |
| Ubiquitin specific peptidase 29                                    | USP29     | 706514    |
| Ubiquitin specific peptidase 32                                    | USP32     | 716857    |
| Ubiquitin specific peptidase 45                                    | USP45     | 694340    |
| Ubiquitin specific peptidase 47                                    | USP47     | 701660    |
| Ubiquitin specific peptidase 48                                    | USP48     | 707110    |
| Ubiquitin specific peptidase 50                                    | USP50     | 716718    |
| Ubiquitin specific peptidase 51                                    | USP51     | 705861    |
| Ubiquitin specific peptidase 7 (herpes virus-associated)           | USP7      | 714625    |
| Ubiquitin specific peptidase 9, Y-linked                           | USP9Y     | 100270704 |
| Ubiquitination factor E4B                                          | UBE4B     | 713348    |
| Ubiquitin-conjugating enzyme E2E 2                                 | UBE2E2    | 699101    |
| UBX domain protein 1                                               | UBXN1     | 718643    |
| UBX domain protein 10                                              | UBXN10    | 705058    |
| UBX domain protein 11                                              | UBXN11    | 719826    |
| UDP-Gal:betaglcnaac beta 1,4- galactosyltransferase, polypeptide 6 | B4GALT6   | 706068    |
| UDP-glcnaac:betagal beta-1,3-N-acetylglucosaminyl transferase 3    | B3GNT3    | 719221    |
| UFM1-specific ligase 1                                             | UFL1      | 704454    |
| UHRF1 binding protein 1-like                                       | UHRF1BP1L | 694816    |
| Uncoupling protein 1 (mitochondrial, proton carrier)               | UCP1      | 574124    |
| Uncoupling protein 3 (mitochondrial, proton carrier)               | UCP3      | 574125    |
| Upstream transcription factor family member 3                      | USF3      | 709660    |
| Uridine monophosphate synthetase                                   | UMPS      | 715664    |
| Urocanate hydratase 1                                              | UROC1     | 716511    |
| Uroplakin 2                                                        | UPK2      | 707184    |
| Usher syndrome 1C                                                  | USH1C     | 696911    |
| Usher syndrome 1G (autosomal recessive)                            | USH1G     | 704494    |
| USP6 N-terminal like                                               | USP6NL    | 694275    |
| Vacuolar protein sorting 13 homolog B (yeast)                      | VPS13B    | 704477    |
| Vacuolar protein sorting 36 homolog (S. Cerevisiae)                | VPS36     | 693290    |

|                                                                       |         |           |
|-----------------------------------------------------------------------|---------|-----------|
| V-akt murine thymoma viral oncogene homolog 3                         | AKT3    | 714717    |
| Valyl-trna synthetase                                                 | VARS    | 715537    |
| VAMP (vesicle-associated membrane protein)-associated protein B and C | VAPB    | 695049    |
| Vanin 2                                                               | VNN2    | 708637    |
| Vascular endothelial growth factor A                                  | VEGFA   | 574209    |
| Vasoactive intestinal peptide receptor 1                              | VIPR1   | 717438    |
| V-crk avian sarcoma virus CT10 oncogene homolog                       | CRK     | 701185    |
| Versican                                                              | VCAN    | 712365    |
| Vesicle (multivesicular body) trafficking 1                           | VT A1   | 701578    |
| Villin 1                                                              | VIL1    | 698946    |
| Villin-like                                                           | VILL    | 696988    |
| Visual system homeobox 1                                              | VSX1    | 715973    |
| Vitamin K epoxide reductase complex subunit 1                         | VKORC1  | 714412    |
| Vitronectin                                                           | VTN     | 708499    |
| V-maf avian musculoaponeurotic fibrosarcoma oncogene homolog B        | MAFB    | 712578    |
| Von Willebrand factor                                                 | VWF     | 722019    |
| Von Willebrand factor A domain containing 1                           | VWA1    | 701765    |
| VPS39 HOPS complex subunit                                            | VPS39   | 707791    |
| VPS52 GARP complex subunit                                            | VPS52   | 100430904 |
| VPS54 GARP complex subunit                                            | VPS54   | 695397    |
| V-set and immunoglobulin domain containing 4                          | VSIG4   | 709685    |
| V-set and transmembrane domain containing 4                           | VSTM4   | 710593    |
| WAP four-disulfide core domain 10A                                    | WFDC10A | 717384    |
| WAP four-disulfide core domain 12                                     | WFDC12  | 711552    |
| WAP four-disulfide core domain 8                                      | WFDC8   | 710108    |
| WD repeat domain 31                                                   | WDR31   | 705565    |
| WD repeat domain 70                                                   | WDR70   | 706130    |
| WD repeat domain 72                                                   | WDR72   | 697128    |
| WD repeat domain 74                                                   | WDR74   | 718460    |
| WD repeat domain 77                                                   | WDR77   | 677686    |
| Wingless-type MMTV integration site family member 10A                 | WNT10A  | 700692    |
| Wingless-type MMTV integration site family member 10B                 | WNT10B  | 708906    |
| Wingless-type MMTV integration site family member 7B                  | WNT7B   | 713864    |
| Wingless-type MMTV integration site family member 8A                  | WNT8A   | 713764    |
| Wingless-type MMTV integration site family member 9B                  | WNT9B   | 716877    |
| WNT1 inducible signaling pathway protein 1                            | WISP1   | 697624    |
| Wolfram syndrome 1 (wolframin)                                        | WFS1    | 710948    |
| WW domain binding protein 1                                           | WBP1    | 709202    |
| WW domain containing E3 ubiquitin protein ligase 2                    | WWP2    | 705464    |
| X antigen family, member 5                                            | XAGE5   | 697885    |
| X-linked Kx blood group related 7                                     | XKR7    | 715770    |
| X-linked Kx blood group related, X-linked                             | XKRX    | 701721    |
| XPA binding protein 2                                                 | XAB2    | 704109    |
| X-prolyl aminopeptidase (aminopeptidase P) 2, membrane-bound          | XPNPEP2 | 701972    |
| X-ray repair complementing defective repair in                        | XRCC6   | 707975    |

|                                                         |         |           |
|---------------------------------------------------------|---------|-----------|
| Chinese hamster cells 6                                 |         |           |
| YEATS domain containing 4                               | YEATS4  | 718376    |
| Yip1 domain family member 4                             | YIPF4   | 706819    |
| Yippee like 3                                           | YPEL3   | 708740    |
| YTH N(6)-methyladenosine RNA binding protein 2          | YTHDF2  | 717225    |
| ZFP28 zinc finger protein                               | ZFP28   | 100425272 |
| Zinc and ring finger 2, E3 ubiquitin protein ligase     | ZNRF2   | 698413    |
| Zinc and ring finger 4                                  | ZNRF4   | 695996    |
| Zinc binding alcohol dehydrogenase domain containing 2  | ZADH2   | 701079    |
| Zinc finger and BTB domain containing 12                | ZBTB12  | 716846    |
| Zinc finger and BTB domain containing 39                | ZBTB39  | 713914    |
| Zinc finger and BTB domain containing 6                 | ZBTB6   | 695858    |
| Zinc finger and BTB domain containing 8 opposite strand | ZBTB8OS | 708590    |
| Zinc finger and SCAN domain containing 1                | ZSCAN1  | 709853    |
| Zinc finger and SCAN domain containing 2                | ZSCAN2  | 695673    |
| Zinc finger CCCH-type containing 12A                    | ZC3H12A | 713604    |
| Zinc finger CCCH-type containing 3                      | ZC3H3   | 708584    |
| Zinc finger protein 19                                  | ZNF19   | 708211    |
| Zinc finger protein 215                                 | ZNF215  | 708494    |
| Zinc finger protein 217                                 | ZNF217  | 699314    |
| Zinc finger protein 22                                  | ZNF22   | 706208    |
| Zinc finger protein 280D                                | ZNF280D | 699509    |
| Zinc finger protein 286A                                | ZNF286A | 694716    |
| Zinc finger protein 319                                 | ZNF319  | 706286    |
| Zinc finger protein 354B                                | ZNF354B | 712885    |
| Zinc finger protein 365                                 | ZNF365  | 698386    |
| Zinc finger protein 382                                 | ZNF382  | 713048    |
| Zinc finger protein 385A                                | ZNF385A | 705436    |
| Zinc finger protein 41                                  | ZNF41   | 706770    |
| Zinc finger protein 436                                 | ZNF436  | 709638    |
| Zinc finger protein 460                                 | ZNF460  | 710080    |
| Zinc finger protein 467                                 | ZNF467  | 712106    |
| Zinc finger protein 474                                 | ZNF474  | 700119    |
| Zinc finger protein 48                                  | ZNF48   | 100429352 |
| Zinc finger protein 496                                 | ZNF496  | 709694    |
| Zinc finger protein 503                                 | ZNF503  | 703912    |
| Zinc finger protein 526                                 | ZNF526  | 707135    |
| Zinc finger protein 574                                 | ZNF574  | 706729    |
| Zinc finger protein 595                                 | ZNF595  | 716693    |
| Zinc finger protein 619                                 | ZNF619  | 718207    |
| Zinc finger protein 645                                 | ZNF645  | 698427    |
| Zinc finger protein 648                                 | ZNF648  | 716032    |
| Zinc finger protein 658                                 | ZNF658  | 100425456 |
| Zinc finger protein 662                                 | ZNF662  | 716008    |
| Zinc finger protein 668                                 | ZNF668  | 712709    |
| Zinc finger protein 692                                 | ZNF692  | 710010    |
| Zinc finger protein 7                                   | ZNF7    | 715735    |
| Zinc finger protein 70                                  | ZNF70   | 698442    |



|                                                |         |           |
|------------------------------------------------|---------|-----------|
| Zinc finger protein 708                        | ZNF708  | 693803    |
| Zinc finger protein 710                        | ZNF710  | 701358    |
| Zinc finger protein 713                        | ZNF713  | 715444    |
| Zinc finger protein 79                         | ZNF79   | 700961    |
| Zinc finger protein 821                        | ZNF821  | 707355    |
| Zinc finger protein 835                        | ZNF835  | 705945    |
| Zinc finger protein, X-linked                  | ZFX     | 106992280 |
| Zinc finger, AN1-type domain 2B                | ZFAND2B | 702027    |
| Zinc finger, CCCH-type with G-patch domain     | ZGPAT   | 719499    |
| Zinc finger, CCHC domain containing 10         | ZCCHC10 | 709423    |
| Zinc finger, CCHC domain containing 16         | ZCCHC16 | 707389    |
| Zinc finger, CCHC domain containing 3          | ZCCHC3  | 714477    |
| Zinc finger, DHHC-type containing 12           | ZDHHC12 | 722606    |
| Zinc finger, DHHC-type containing 16           | ZDHHC16 | 705982    |
| Zinc finger, DHHC-type containing 17           | ZDHHC17 | 693595    |
| Zinc finger, DHHC-type containing 4            | ZDHHC4  | 704660    |
| Zinc finger, DHHC-type containing 5            | ZDHHC5  | 704863    |
| Zinc finger, matrin-type 5                     | ZMAT5   | 715058    |
| Zinc finger, MYM-type 4                        | ZMYM4   | 712793    |
| Zinc finger, MYND-type containing 11           | ZMYND11 | 708761    |
| Zinc finger, MYND-type containing 12           | ZMYND12 | 696941    |
| Zinc ribbon domain containing 1                | ZNRD1   | 712151    |
| Zona pellucida binding protein 2               | ZPBP2   | 698217    |
| Zona pellucida glycoprotein 2 (sperm receptor) | ZP2     | 697458    |
| Zona pellucida glycoprotein 3 (sperm receptor) | ZP3     | 719925    |
| Zona pellucida glycoprotein 4                  | ZP4     | 709637    |
| Zyg-11 related, cell cycle regulator           | ZER1    | 717262    |
| Zygote arrest 1                                | ZAR1    | 705829    |

---

**(4) Expressed in both groups 1a and 1c, but not in group 1b**

|                                                   |        |        |
|---------------------------------------------------|--------|--------|
| 1-acylglycerol-3-phosphate O-acyltransferase 1    | AGPAT1 | 717174 |
| 1-acylglycerol-3-phosphate O-acyltransferase 3    | AGPAT3 | 713301 |
| 3-hydroxyanthranilate 3,4-dioxygenase             | HAAO   | 713101 |
| 3-hydroxybutyrate dehydrogenase, type 2           | BDH2   | 711108 |
| 5-phosphohydroxy-L-lysine phospho-lyase           | PHYKPL | 702302 |
| 8-oxoguanine DNA glycosylase                      | OGG1   | 700481 |
| Aarf domain containing kinase 2                   | ADCK2  | 693303 |
| Aarf domain containing kinase 4                   | ADCK4  | 702379 |
| Abhydrolase domain containing 1                   | ABHD1  | 698700 |
| Abhydrolase domain containing 4                   | ABHD4  | 711758 |
| Abhydrolase domain containing 8                   | ABHD8  | 718980 |
| ABI family member 3                               | ABI3   | 698710 |
| Achaete-scute family bhlh transcription factor 1  | ASCL1  | 698820 |
| Acid phosphatase 2, lysosomal                     | ACP2   | 713744 |
| Acid phosphatase 7, tartrate resistant (putative) | ACP7   | 695532 |
| Acidic nuclear phosphoprotein 32 family member E  | ANP32E | 706251 |

|                                                                                                                        |          |        |
|------------------------------------------------------------------------------------------------------------------------|----------|--------|
| Acrosin binding protein                                                                                                | ACRBP    | 713219 |
| Actin like 7B                                                                                                          | ACTL7B   | 710750 |
| Actinin, alpha 2                                                                                                       | ACTN2    | 710012 |
| Activating transcription factor 3                                                                                      | ATF3     | 710832 |
| Activin A receptor type IIB                                                                                            | ACVR2B   | 696071 |
| Acyl-coa dehydrogenase family member 9                                                                                 | ACAD9    | 704527 |
| Acyl-coa dehydrogenase, C-2 to C-3 short chain                                                                         | ACADS    | 698196 |
| Acylglycerol kinase                                                                                                    | AGK      | 694070 |
| ADAM metalloproteinase domain 19                                                                                       | ADAM19   | 715164 |
| ADAM metalloproteinase domain 2                                                                                        | ADAM2    | 707303 |
| ADAM metalloproteinase with thrombospondin type 1 motif 14                                                             | ADAMTS14 | 710154 |
| ADAM metalloproteinase with thrombospondin type 1 motif 16                                                             | ADAMTS16 | 694474 |
| ADAM metalloproteinase with thrombospondin type 1 motif 20                                                             | ADAMTS20 | 699935 |
| ADAM metalloproteinase with thrombospondin type 1 motif 6                                                              | ADAMTS6  | 696021 |
| ADAMTS like 2                                                                                                          | ADAMTSL2 | 713492 |
| Adaptor related protein complex 1 associated regulatory protein                                                        | AP1AR    | 700734 |
| Adaptor related protein complex 2 sigma 1 subunit                                                                      | AP2S1    | 716911 |
| Adaptor related protein complex 2, mu 1 subunit                                                                        | AP2M1    | 703554 |
| Adaptor related protein complex 3, beta 2 subunit                                                                      | AP3B2    | 694091 |
| Adaptor related protein complex 5, sigma 1 subunit                                                                     | AP5S1    | 718611 |
| Adenosine deaminase domain containing 1                                                                                | ADAD1    | 707910 |
| Adenosine deaminase domain containing 2                                                                                | ADAD2    | 715076 |
| Adenylate cyclase 4                                                                                                    | ADCY4    | 714684 |
| Adenylate cyclase 6                                                                                                    | ADCY6    | 707978 |
| Adhesion molecule with Ig-like domain 2                                                                                | AMIGO2   | 705386 |
| ADP-ribosylation factor like gtpase 6 interacting protein 6                                                            | ARL6IP6  | 695619 |
| ADP-ribose/CDP-alcohol diphosphatase, manganese-dependent                                                              | ADPRM    | 717991 |
| ADP-ribosylarginine hydrolase                                                                                          | ADPRH    | 712562 |
| ADP-ribosyltransferase 5                                                                                               | ART5     | 574238 |
| A-kinase anchoring protein 12                                                                                          | AKAP12   | 641446 |
| A-kinase anchoring protein 2                                                                                           | AKAP2    | 709841 |
| A-kinase anchoring protein 8 like                                                                                      | AKAP8L   | 719202 |
| Aladin WD repeat nucleoporin                                                                                           | AAAS     | 719095 |
| Aldo-keto reductase family 1, member A1 (aldehyde reductase)                                                           | AKR1A1   | 693380 |
| Aldo-keto reductase family 1, member C1 (dihydrodiol dehydrogenase 1; 20-alpha (3-alpha)-hydroxysteroid dehydrogenase) | AKR1C1   | 711198 |
| Aldo-keto reductase family 1, member E2                                                                                | AKR1E2   | 711035 |
| Alkaline ceramidase 1                                                                                                  | ACER1    | 699093 |
| Alkb homolog 2, alpha-ketoglutarate-dependent dioxygenase                                                              | ALKBH2   | 706708 |
| Alkb homolog 4, lysine demethylase                                                                                     | ALKBH4   | 715078 |
| Allograft inflammatory factor 1                                                                                        | AIF1     | 574115 |

|                                                                                                      |          |           |
|------------------------------------------------------------------------------------------------------|----------|-----------|
| Alpha 1,4-galactosyltransferase                                                                      | A4GALT   | 710998    |
| Alpha hemoglobin stabilizing protein                                                                 | AHSP     | 714392    |
| Alpha-2-HS-glycoprotein                                                                              | AHSG     | 699348    |
| Alport syndrome, mental retardation, midface hypoplasia and elliptocytosis chromosomal region gene 1 | AMMECR1  | 705858    |
| Amidohydrolase domain containing 2                                                                   | AMDHD2   | 697051    |
| Amine oxidase, copper containing 2                                                                   | AOC2     | 100431016 |
| Aminoacylase 3                                                                                       | ACY3     | 711083    |
| Aminoadipate-semialdehyde dehydrogenase-phosphopantetheinyl transferase                              | AASDHPPT | 100328984 |
| Aminocarboxymuconate semialdehyde decarboxylase                                                      | ACMSD    | 708917    |
| Amyloid beta (A4) precursor protein-binding, family B, member 1 (Fe65)                               | APBB1    | 712585    |
| Amyloid beta (A4) precursor-like protein 1                                                           | APLP1    | 711258    |
| Amyloid beta (A4) precursor-like protein 2                                                           | APLP2    | 718819    |
| Anaphase promoting complex subunit 2                                                                 | ANAPC2   | 706384    |
| Ancient ubiquitous protein 1                                                                         | AUP1     | 710020    |
| Angiomotin like 2                                                                                    | AMOTL2   | 718868    |
| Angiopoietin like 2                                                                                  | ANGPTL2  | 701444    |
| Angiopoietin like 7                                                                                  | ANGPTL7  | 714204    |
| Ankyrin 2, neuronal                                                                                  | ANK2     | 702180    |
| Ankyrin repeat and IBR domain containing 1                                                           | ANKIB1   | 703273    |
| Ankyrin repeat and SOCS box containing 12                                                            | ASB12    | 707931    |
| Ankyrin repeat and SOCS box containing 3                                                             | ASB3     | 716503    |
| Ankyrin repeat domain 1 (cardiac muscle)                                                             | ANKRD1   | 696653    |
| Ankyrin repeat domain 13 family member D                                                             | ANKRD13D | 721749    |
| Ankyrin repeat domain 13C                                                                            | ANKRD13C | 702811    |
| Ankyrin repeat domain 2 (stretch responsive muscle)                                                  | ANKRD2   | 707097    |
| Ankyrin repeat domain 49                                                                             | ANKRD49  | 697693    |
| Ankyrin repeat domain 6                                                                              | ANKRD6   | 701339    |
| Anoctamin 4                                                                                          | ANO4     | 695973    |
| Anti-Mullerian hormone receptor, type II                                                             | AMHR2    | 702822    |
| Anti-silencing function 1A histone chaperone                                                         | ASF1A    | 714761    |
| Antizyme inhibitor 2                                                                                 | AZIN2    | 709823    |
| Aph-1 homolog A, gamma secretase subunit                                                             | APH1A    | 706483    |
| Aph-1 homolog B, gamma secretase subunit                                                             | APH1B    | 705718    |
| Apolipoprotein B mrna editing enzyme, catalytic polypeptide-like 3G                                  | APOBEC3G | 574398    |
| Apolipoprotein B mrna editing enzyme, catalytic polypeptide-like 3H                                  | APOBEC3H | 723811    |
| Apolipoprotein B receptor                                                                            | APOBR    | 705950    |
| Apolipoprotein C-I                                                                                   | APOC1    | 106994800 |
| Apolipoprotein C-III                                                                                 | APOC3    | 696726    |
| Apoptosis inducing factor, mitochondria associated 1                                                 | AIFM1    | 702773    |
| Apoptosis inducing factor, mitochondria associated 3                                                 | AIFM3    | 100430576 |
| Aprataxin                                                                                            | APTIX    | 702671    |
| Aquaporin 4                                                                                          | AQP4     | 703773    |
| Aquaporin 8                                                                                          | AQP8     | 702167    |

|                                                                                               |          |           |
|-----------------------------------------------------------------------------------------------|----------|-----------|
| Arachidonate 5-lipoxygenase-activating protein                                                | ALOX5AP  | 713170    |
| Aralkylamine N-acetyltransferase                                                              | AANAT    | 706924    |
| Arfgap with rhogap domain, ankyrin repeat and PH domain 3                                     | ARAP3    | 701400    |
| Arginine/serine-rich coiled-coil 1                                                            | RSRC1    | 704232    |
| Arginine/serine-rich coiled-coil 2                                                            | RSRC2    | 706564    |
| ARP1 actin-related protein 1 homolog A, centractin<br>alpha (yeast)                           | ACTR1A   | 713513    |
| ARP1 actin-related protein 1 homolog B, centractin<br>beta (yeast)                            | ACTR1B   | 707328    |
| ARP3 actin-related protein 3 homolog B (yeast)                                                | ACTR3B   | 715965    |
| Arsa arsenite transporter, ATP-binding, homolog 1<br>(bacterial)                              | ASNA1    | 717734    |
| Artemin                                                                                       | ARTN     | 701641    |
| Aryl hydrocarbon receptor nuclear translocator 2                                              | ARNT2    | 712786    |
| Arylsulfatase A                                                                               | ARSA     | 716500    |
| Ash2 (absent, small, or homeotic)-like (Drosophila)                                           | ASH2L    | 699382    |
| Aspartate beta-hydroxylase domain containing 1                                                | ASPHD1   | 707467    |
| Aspartate dehydrogenase domain containing                                                     | ASPDH    | 719609    |
| Ataxin 2-like                                                                                 | ATXN2L   | 708359    |
| Atlantin gtpase 1                                                                             | ATL1     | 706313    |
| ATP binding cassette subfamily B member 6 (Langereis<br>blood group)                          | ABCB6    | 704599    |
| ATP binding cassette subfamily C member 8                                                     | ABCC8    | 654490    |
| ATP binding cassette subfamily G member 2 (Junior<br>blood group)                             | ABCG2    | 574307    |
| ATP binding cassette subfamily G member 8                                                     | ABCG8    | 713676    |
| ATP citrate lyase                                                                             | ACLY     | 708501    |
| ATP synthase F0 subunit 6                                                                     | ATP6     | 2846629   |
| ATP synthase, H <sup>+</sup> transporting, mitochondrial F1 complex,<br>delta subunit         | ATP5D    | 705944    |
| ATP synthase, H <sup>+</sup> transporting, mitochondrial Fo complex<br>subunit C1 (subunit 9) | ATP5G1   | 697950    |
| ATP synthase, H <sup>+</sup> transporting, mitochondrial Fo complex<br>subunit C2 (subunit 9) | ATP5G2   | 703751    |
| ATPase family, AAA domain containing 2                                                        | ATAD2    | 704478    |
| ATPase, aminophospholipid transporter (APLT), class I,<br>type 8A, member 1                   | ATP8A1   | 702630    |
| ATPase, class II, type 9A                                                                     | ATP9A    | 710250    |
| ATPase, H <sup>+</sup> transporting, lysosomal 14kda, V1 subunit F                            | ATP6V1F  | 702112    |
| ATPase, H <sup>+</sup> transporting, lysosomal 21kda, V0 subunit b                            | ATP6V0B  | 702243    |
| ATPase, H <sup>+</sup> /K <sup>+</sup> exchanging, alpha polypeptide                          | ATP4A    | 100426216 |
| ATP-binding cassette transporter 13                                                           | ABCC13   | 574326    |
| Atypical chemokine receptor 1 (Duffy blood group)                                             | ACKR1    | 719284    |
| Aurora kinase A interacting protein 1                                                         | AURKAIP1 | 706329    |
| Aurora kinase C                                                                               | AURKC    | 709801    |
| Autophagy related 13                                                                          | ATG13    | 714322    |
| Autophagy related 2A                                                                          | ATG2A    | 717290    |
| Autophagy related 7                                                                           | ATG7     | 696238    |

|                                                                         |           |        |
|-------------------------------------------------------------------------|-----------|--------|
| B9 protein domain 1                                                     | B9D1      | 702949 |
| B9 protein domain 2                                                     | B9D2      | 704873 |
| Baculoviral IAP repeat containing 7                                     | BIRC7     | 697671 |
| BAI1-associated protein 2-like 2                                        | BAIAP2L2  | 700058 |
| Bardet-Biedl syndrome 9                                                 | BBS9      | 708412 |
| BARX homeobox 2                                                         | BARX2     | 715001 |
| Basic leucine zipper transcription factor, ATF-like 2                   | BATF2     | 722022 |
| Basic transcription factor 3-like 4                                     | BTF3L4    | 712955 |
| BCDIN3 domain containing RNA methyltransferase                          | BCDIN3D   | 711559 |
| B-cell CLL/lymphoma 2                                                   | BCL2      | 707407 |
| B-cell CLL/lymphoma 7B                                                  | BCL7B     | 716470 |
| B-cell CLL/lymphoma 7C                                                  | BCL7C     | 712065 |
| B-cell CLL/lymphoma 9                                                   | BCL9      | 700800 |
| B-cell receptor-associated protein 31                                   | BCAP31    | 696663 |
| BCL2 associated athanogene 2                                            | BAG2      | 712778 |
| BCL2/adenovirus E1B 19kda interacting protein 1                         | BNIP1     | 703576 |
| BCL2-associated X protein                                               | BAX       | 718948 |
| BCL6 corepressor                                                        | BCOR      | 698644 |
| BCS1-like (S. Cerevisiae)                                               | BCS1L     | 699690 |
| Beclin 1, autophagy related                                             | BECN1     | 711649 |
| Bestrophin 1                                                            | BEST1     | 718993 |
| Beta-1,3-galactosyltransferase 1                                        | B3GALT1   | 704744 |
| Beta-1,3-galactosyltransferase 4                                        | B3GALT4   | 718178 |
| Beta-1,3-glucuronyltransferase 3                                        | B3GAT3    | 718744 |
| Beta-1,4-glucuronyltransferase 1                                        | B4GAT1    | 714270 |
| Beta-1,4-N-acetyl-galactosaminyl transferase 1                          | B4GALNT1  | 715317 |
| Beta-2-microglobulin                                                    | B2M       | 712428 |
| Bloom syndrome, recq helicase-like                                      | BLM       | 703460 |
| Bone morphogenetic protein 1                                            | BMP1      | 707596 |
| Bone morphogenetic protein receptor type IA                             | BMPRI1A   | 696898 |
| BPI fold containing family A member 2                                   | BPIFA2    | 710376 |
| BPI fold containing family C                                            | BPIFC     | 717287 |
| Brain and reproductive organ-expressed (TNFRSF1A modulator)             | BRE       | 702365 |
| Brain-derived neurotrophic factor                                       | BDNF      | 701245 |
| BRCA1 associated protein 1                                              | BAP1      | 697221 |
| Breast cancer anti-estrogen resistance 1                                | BCAR1     | 713965 |
| Breast cancer metastasis-suppressor 1-like                              | BRMS1L    | 695909 |
| Breast carcinoma amplified sequence 4                                   | BCAS4     | 701649 |
| Brevican                                                                | BCAN      | 718545 |
| BRF1, RNA polymerase III transcription initiation factor 90 kda subunit | BRF1      | 709533 |
| BRICHOS domain containing 5                                             | BRICD5    | 695765 |
| Bromodomain adjacent to zinc finger domain 1B                           | BAZ1B     | 716436 |
| Bromodomain containing 2                                                | BRD2      | 717893 |
| BUB3 mitotic checkpoint protein                                         | BUB3      | 708033 |
| C1GALT1 specific chaperone 1                                            | C1GALT1C1 | 696662 |
| C1q and tumor necrosis factor related protein 1                         | C1QTNF1   | 711093 |

|                                                                                   |          |           |
|-----------------------------------------------------------------------------------|----------|-----------|
| Cadherin 11, type 2, OB-cadherin (osteoblast)                                     | CDH11    | 708826    |
| Cadherin 17, LI cadherin (liver-intestine)                                        | CDH17    | 698886    |
| Cadherin 24, type 2                                                               | CDH24    | 713241    |
| Cadherin related family member 2                                                  | CDHR2    | 697249    |
| Calcitonin-related polypeptide alpha                                              | CALCA    | 700649    |
| Calcium and integrin binding family member 2                                      | CIB2     | 709429    |
| Calcium binding protein 5                                                         | CABP5    | 718484    |
| Calcium channel, voltage-dependent, beta 3 subunit                                | CACNB3   | 708091    |
| Calcium homeostasis modulator 2                                                   | CALHM2   | 714662    |
| Calcium/calmodulin-dependent protein kinase II delta                              | CAMK2D   | 702504    |
| Calcium/calmodulin-dependent protein kinase kinase 1, alpha                       | CAMKK1   | 707562    |
| Calcium/calmodulin-dependent serine protein kinase (MAGUK family)                 | CASK     | 707428    |
| Calcyon neuron-specific vesicular protein                                         | CALY     | 702415    |
| Calmegin                                                                          | CLGN     | 698361    |
| Calmodulin like 3                                                                 | CALML3   | 722513    |
| Calponin 3, acidic                                                                | CNN3     | 709538    |
| Calreticulin                                                                      | CALR     | 716910    |
| Cannabinoid receptor 2                                                            | CNR2     | 711155    |
| Canopy FGF signaling regulator 3                                                  | CNPY3    | 100424672 |
| CAP-Gly domain containing linker protein 3                                        | CLIP3    | 712058    |
| Capping protein (actin filament), gelsolin-like                                   | CAPG     | 695288    |
| Carbohydrate (chondroitin 4) sulfotransferase 13                                  | CHST13   | 716548    |
| Carbohydrate sulfotransferase 8                                                   | CHST8    | 106992408 |
| Carbonic anhydrase IX                                                             | CA9      | 696729    |
| Carbonic anhydrase VB, mitochondrial                                              | CA5B     | 713128    |
| Carbonyl reductase 3                                                              | CBR3     | 695769    |
| Carboxypeptidase N subunit 2                                                      | CPN2     | 106997192 |
| Carboxypeptidase X (M14 family), member 1                                         | CPXM1    | 716790    |
| Cardiotrophin 1                                                                   | CTF1     | 713850    |
| Carnitine palmitoyltransferase 1A (liver)                                         | CPT1A    | 709837    |
| Cartilage acidic protein 1                                                        | CRTAC1   | 707486    |
| Casein kinase 1, alpha 1-like                                                     | CSNK1A1L | 695190    |
| Casein kinase 2, beta polypeptide                                                 | CSNK2B   | 715807    |
| CASK interacting protein 2                                                        | CASKIN2  | 702477    |
| Caspase 8 associated protein 2                                                    | CASP8AP2 | 702294    |
| Caspase recruitment domain family member 18                                       | CARD18   | 705678    |
| Catalase                                                                          | CAT      | 717406    |
| Cathepsin C                                                                       | CTSC     | 705320    |
| Cathepsin K                                                                       | CTSK     | 574112    |
| Caveolin 2                                                                        | CAV2     | 706980    |
| Cbl proto-oncogene B, E3 ubiquitin protein ligase                                 | CBLB     | 703879    |
| Cbp/p300-interacting transactivator, with Glu/Asp rich carboxy-terminal domain, 1 | CITED1   | 703165    |
| CCCTC-binding factor (zinc finger protein)-like                                   | CTCFL    | 701500    |
| CCR4-NOT transcription complex subunit 1                                          | CNOT1    | 712880    |
| CD14 molecule                                                                     | CD14     | 697482    |

|                                                            |          |           |
|------------------------------------------------------------|----------|-----------|
| CD19 molecule                                              | CD19     | 705211    |
| CD1c molecule                                              | CD1C     | 717148    |
| CD37 molecule                                              | CD37     | 718718    |
| CD4 molecule                                               | CD4      | 713807    |
| CD40 ligand                                                | CD40LG   | 574160    |
| CD40 molecule, TNF receptor superfamily member 5           | CD40     | 707749    |
| CD52 molecule                                              | CD52     | 714429    |
| CD53 molecule                                              | CD53     | 702350    |
| CD63 molecule                                              | CD63     | 709828    |
| CD79b molecule                                             | CD79B    | 718218    |
| CD81 molecule                                              | CD81     | 704961    |
| CD8b molecule                                              | CD8B     | 699409    |
| CDC42 effector protein (Rho gtpase binding) 2              | CDC42EP2 | 716504    |
| Cell death-inducing DFFA-like effector b                   | CIDEB    | 100425328 |
| Cell death-inducing p53 target 1                           | CDIP1    | 705579    |
| Cell division cycle 23                                     | CDC23    | 714000    |
| Cell division cycle 6                                      | CDC6     | 700081    |
| Cell growth regulator with ring finger domain 1            | CGRRF1   | 695231    |
| Centrin 1                                                  | CETN1    | 697701    |
| Centrobin, centrosomal BRCA2 interacting protein           | CNTROB   | 716660    |
| Centromere protein J                                       | CENPJ    | 721498    |
| Centromere protein Q                                       | CENPQ    | 721027    |
| Centrosomal protein 131kda                                 | CEP131   | 718613    |
| Centrosomal protein 250kda                                 | CEP250   | 705173    |
| Centrosomal protein 41kda                                  | CEP41    | 703215    |
| Centrosomal protein 57kda-like 1                           | CEP57L1  | 700109    |
| Centrosomal protein 85kda-like                             | CEP85L   | 714810    |
| Ceramide synthase 5                                        | CERS5    | 713449    |
| Cerberus 1, DAN family BMP antagonist                      | CER1     | 713924    |
| Cerebellar degeneration-related protein 2-like             | CDR2L    | 700082    |
| Cerebral cavernous malformation 2                          | CCM2     | 705037    |
| Ceroid-lipofuscinosis, neuronal 6, late infantile, variant | CLN6     | 693873    |
| Chaperonin containing TCP1, subunit 5 (epsilon)            | CCT5     | 696640    |
| Chemokine (C-C motif) ligand 13                            | CCL13    | 714907    |
| Chemokine (C-C motif) ligand 18                            | CCL18    | 574181    |
| Chemokine (C-C motif) ligand 25                            | CCL25    | 574219    |
| Chemokine (C-C motif) ligand 7                             | CCL7     | 714751    |
| Chemokine (C-C motif) receptor 9                           | CCR9     | 713934    |
| Chemokine (C-X-C motif) receptor 3                         | CXCR3    | 699438    |
| Chemokine-like factor                                      | CKLF     | 693673    |
| Chitinase 1                                                | CHIT1    | 703286    |
| Chitinase domain containing 1                              | CHID1    | 701435    |
| Chitobiase, di-N-acetyl-                                   | CTBS     | 710366    |
| Chloride channel, voltage-sensitive 2                      | CLCN2    | 704709    |
| Choline kinase beta                                        | CHKB     | 716377    |
| Choline O-acetyltransferase                                | CHAT     | 709977    |
| Cholinergic receptor, nicotinic alpha 10                   | CHRNA10  | 718133    |
| Cholinergic receptor, nicotinic alpha 3                    | CHRNA3   | 716571    |

|                                                         |             |           |
|---------------------------------------------------------|-------------|-----------|
| Cholinergic receptor, nicotinic alpha 7                 | CHRNA7      | 574230    |
| Chondroitin polymerizing factor                         | CHPF        | 703860    |
| Chondroitin sulfate N-acetylgalactosaminyltransferase 1 | CSGALNACT1  | 704901    |
| Chromodomain helicase DNA binding protein 3             | CHD3        | 716508    |
| Chromodomain helicase DNA binding protein 4             | CHD4        | 713162    |
| Chromosome 1 open reading frame, human c1orf198         | C1H1orf198  | 714084    |
| Chromosome 1 open reading frame, human c1orf35          | C1H1orf35   | 695723    |
| Chromosome 1 open reading frame, human c1orf54          | C1H1orf54   | 107000832 |
| Chromosome 1 open reading frame, human c1orf56          | C1H1orf56   | 709090    |
| Chromosome 10 open reading frame 93 ortholog            | C9H10orf93  | 719561    |
| Chromosome 10 open reading frame, human c20orf27        | C10H20orf27 | 717525    |
| Chromosome 10 open reading frame, human c22orf23        | C10H22orf23 | 699449    |
| Chromosome 11 open reading frame, human c12orf10        | C11H12orf10 | 702255    |
| Chromosome 11 open reading frame, human c12orf57        | C11H12orf57 | 714482    |
| Chromosome 13 open reading frame, human c2orf40         | C13H2orf40  | 713611    |
| Chromosome 13 open reading frame, human c2orf49         | C13H2orf49  | 713165    |
| Chromosome 14 open reading frame, human c11orf68        | C14H11orf68 | 715318    |
| Chromosome 15 open reading frame, human c9orf16         | C15H9orf16  | 722628    |
| Chromosome 16 open reading frame, human c17orf49        | C16H17orf49 | 713820    |
| Chromosome 16 open reading frame, human c17orf53        | C16H17orf53 | 711524    |
| Chromosome 19 open reading frame, human c19orf24        | C19H19orf24 | 706393    |
| Chromosome 19 open reading frame, human c19orf43        | C19H19orf43 | 716466    |
| Chromosome 19 open reading frame, human c19orf47        | C19H19orf47 | 701191    |
| Chromosome 19 open reading frame, human c19orf66        | C19H19orf66 | 714622    |
| Chromosome 2 open reading frame, human c3orf18          | C2H3orf18   | 701675    |
| Chromosome 20 open reading frame, human c16orf13        | C20H16orf13 | 696495    |
| Chromosome 20 open reading frame, human c16orf62        | C20H16orf62 | 695027    |
| Chromosome 3 open reading frame, human c21orf91         | C3H21orf91  | 710406    |
| Chromosome 3 open reading frame, human c7orf62          | C3H7orf62   | 704775    |
| Chromosome 5 open reading frame, human c4orf45          | C5H4orf45   | 100427200 |
| Chromosome 6 open reading frame, human c5orf22          | C6H5orf22   | 695901    |
| Chromosome 7 open reading frame, human c14orf166        | C7H14orf166 | 710094    |
| Chromosome 7 open reading frame, human c14orf169        | C7H14orf169 | 696773    |
| Chromosome 7 open reading frame, human c14orf37         | C7H14orf37  | 699880    |
| Chromosome 7 open reading frame, human c14orf80         | C7H14orf80  | 699883    |
| Chromosome 7 open reading frame, human c15orf39         | C7H15orf39  | 704143    |
| Chromosome 8 open reading frame, human c8orf46          | C8H8orf46   | 703243    |
| Chromosome 8 open reading frame, human c8orf48          | C8H8orf48   | 700746    |
| Chromosome 8 open reading frame, human c8orf59          | C8H8orf59   | 703464    |
| Chromosome X open reading frame, human cxorf40a         | CXHXorf40A  | 702659    |
| Chymotrypsinogen B2                                     | CTRB2       | 711100    |
| Cilia and flagella associated protein 161               | CFAP161     | 713184    |
| Cilia and flagella associated protein 65                | CFAP65      | 701296    |
| Ciliary neurotrophic factor                             | CNTF        | 701907    |
| Ciliogenesis associated TTC17 interacting protein       | CATIP       | 698579    |
| CKLF-like MARVEL transmembrane domain containing 3      | CMTM3       | 695592    |
| Clarín 3                                                | CLRN3       | 697496    |
| Clathrin, heavy chain-like 1                            | CLTCL1      | 719087    |



|                                                          |          |        |
|----------------------------------------------------------|----------|--------|
| Claudin 16                                               | CLDN16   | 704442 |
| Claudin 17                                               | CLDN17   | 705582 |
| Claudin 20                                               | CLDN20   | 701937 |
| Clavesin 2                                               | CLVS2    | 713626 |
| Cleavage and polyadenylation specific factor 1           | CPSF1    | 702082 |
| Cleavage and polyadenylation specific factor 4           | CPSF4    | 708119 |
| Cleft lip and palate associated transmembrane protein 1  | CLPTM1   | 718306 |
| Clpb homolog, mitochondrial AAA ATPase chaperonin        | CLPB     | 718461 |
| CNKSR family member 3                                    | CNKSR3   | 702627 |
| Coatmer protein complex subunit epsilon                  | COPE     | 719631 |
| Coatmer protein complex subunit zeta 2                   | COPZ2    | 696299 |
| Codanin 1                                                | CDAN1    | 708838 |
| Cofilin 1 (non-muscle)                                   | CFL1     | 721882 |
| Cofilin 2 (muscle)                                       | CFL2     | 693875 |
| Coiled-coil domain containing 102B                       | CCDC102B | 710808 |
| Coiled-coil domain containing 136                        | CCDC136  | 701874 |
| Coiled-coil domain containing 142                        | CCDC142  | 709014 |
| Coiled-coil domain containing 148                        | CCDC148  | 698322 |
| Coiled-coil domain containing 17                         | CCDC17   | 706591 |
| Coiled-coil domain containing 22                         | CCDC22   | 713063 |
| Coiled-coil domain containing 24                         | CCDC24   | 702564 |
| Coiled-coil domain containing 42                         | CCDC42   | 717532 |
| Coiled-coil domain containing 62                         | CCDC62   | 707179 |
| Coiled-coil domain containing 69                         | CCDC69   | 713304 |
| Coiled-coil domain containing 82                         | CCDC82   | 700198 |
| Coiled-coil domain containing 85B                        | CCDC85B  | 715413 |
| Coiled-coil domain containing 86                         | CCDC86   | 695978 |
| Coiled-coil domain containing 92                         | CCDC92   | 705922 |
| Coiled-coil-helix-coiled-coil-helix domain containing 10 | CHCHD10  | 720205 |
| Coiled-coil-helix-coiled-coil-helix domain containing 2  | CHCHD2   | 702967 |
| Coiled-coil-helix-coiled-coil-helix domain containing 8  | CHCHD8   | 718275 |
| Colipase                                                 | CLPS     | 719005 |
| Collagen, type III, alpha 1                              | COL3A1   | 574131 |
| Collagen, type VI, alpha 1                               | COL6A1   | 721855 |
| Collagen, type VI, alpha 3                               | COL6A3   | 694701 |
| Collagen, type XII, alpha 1                              | COL12A1  | 717820 |
| Collagen, type XVI, alpha 1                              | COL16A1  | 706149 |
| Collagen, type XXIV, alpha 1                             | COL24A1  | 711713 |
| Colony stimulating factor 1 (macrophage)                 | CSF1     | 702532 |
| Colony stimulating factor 3                              | CSF3     | 698961 |
| Colony stimulating factor 3 receptor                     | CSF3R    | 713485 |
| COMM domain containing 9                                 | COMMMD9  | 716992 |
| Complement component 1, q subcomponent, C chain          | C1QC     | 708589 |
| Complement component 1, s subcomponent                   | C1S      | 714589 |
| Complement component 3a receptor 1                       | C3AR1    | 716086 |
| Complement factor properdin                              | CFP      | 707386 |
| Complexin 1                                              | CPLX1    | 703519 |
| Contactin 1                                              | CNTN1    | 574365 |

|                                                                          |          |           |
|--------------------------------------------------------------------------|----------|-----------|
| Coordinator of PRMT5, differentiation stimulator                         | COPRS    | 713293    |
| COP9 signalosome subunit 4                                               | COPS4    | 693435    |
| Copine III                                                               | CPNE3    | 694013    |
| Copper chaperone for superoxide dismutase                                | CCS      | 721802    |
| Core-binding factor, runt domain, alpha subunit 2;<br>translocated to, 3 | CBFA2T3  | 698233    |
| Cornichon family AMPA receptor auxiliary protein 1                       | CNIH1    | 695002    |
| Cornulin                                                                 | CRNN     | 712894    |
| Coronin, actin binding protein, 1B                                       | CORO1B   | 721725    |
| COX19 cytochrome c oxidase assembly homolog<br>( <i>S. Cerevisiae</i> )  | COX19    | 696368    |
| Creatine kinase, brain                                                   | CKB      | 711167    |
| CREB regulated transcription coactivator 2                               | CRTC2    | 715908    |
| Crumbs family member 3                                                   | CRB3     | 700086    |
| Cryptochrome circadian clock 2                                           | CRY2     | 715000    |
| Crystallin lambda 1                                                      | CRYL1    | 703988    |
| C-src tyrosine kinase                                                    | CSK      | 702868    |
| CTD small phosphatase 2                                                  | CTDSP2   | 715956    |
| CTP synthase 2                                                           | CTPS2    | 721014    |
| C-type lectin domain family 12 member A                                  | CLEC12A  | 722319    |
| CUE domain containing 2                                                  | CUEDC2   | 713243    |
| C-x(9)-C motif containing 4                                              | CMC4     | 100423504 |
| Cyclin D binding myb-like transcription factor 1                         | DMTF1    | 706292    |
| Cyclin D3                                                                | CCND3    | 695215    |
| Cyclin Pas1/PHO80 domain containing 1                                    | CNPPD1   | 704271    |
| Cyclin T1                                                                | CCNT1    | 707754    |
| Cyclin-dependent kinase 14                                               | CDK14    | 703442    |
| Cyclin-dependent kinase 16                                               | CDK16    | 712033    |
| Cyclin-dependent kinase 19                                               | CDK19    | 698292    |
| Cyclin-dependent kinase 2 interacting protein                            | CINP     | 709044    |
| Cyclin-dependent kinase 4                                                | CDK4     | 715650    |
| Cyclin-dependent kinase 5, regulatory subunit 1 (p35)                    | CDK5R1   | 714274    |
| Cyclin-dependent kinase 8                                                | CDK8     | 709761    |
| Cyclin-dependent kinase-like 1 (CDC2-related kinase)                     | CDKL1    | 705975    |
| Cystatin C                                                               | CST3     | 574313    |
| Cystatin F                                                               | CST7     | 704850    |
| Cysteine-serine-rich nuclear protein 2                                   | CSRNP2   | 694549    |
| Cystinosin, lysosomal cystine transporter                                | CTNS     | 706721    |
| Cytidine deaminase                                                       | CDA      | 705913    |
| Cytochrome b-561 domain containing 2                                     | CYB561D2 | 702280    |
| Cytochrome c oxidase subunit III                                         | COX3     | 2846633   |
| Cytochrome c oxidase subunit viia polypeptide 2 like                     | COX7A2L  | 712764    |
| Cytochrome c oxidase subunit viib                                        | COX7B    | 706099    |
| Cytochrome c oxidase subunit VIIIA (ubiquitous)                          | COX8A    | 718007    |
| Cytochrome P450, family 2, subfamily D, polypeptide 6                    | CYP2D6   | 678691    |
| Cytochrome P450, family 2, subfamily E, polypeptide 1                    | CYP2E1   | 678688    |
| Cytochrome P450, family 4, subfamily F, polypeptide 8                    | CYP4F8   | 718335    |
| Cytochrome P450c17                                                       | CYP17A1  | 678693    |

|                                                                |         |        |
|----------------------------------------------------------------|---------|--------|
| Cytosolic thiouridylase subunit 1                              | CTU1    | 719536 |
| Cytotoxic and regulatory T-cell molecule                       | CRTAM   | 707560 |
| Dab, mitogen-responsive phosphoprotein, homolog 2 (Drosophila) | DAB2    | 694349 |
| Dachsous cadherin-related 1                                    | DCHS1   | 711938 |
| Damage-specific DNA binding protein 2                          | DDB2    | 713813 |
| D-amino-acid oxidase                                           | DAO     | 706373 |
| DAZ associated protein 2                                       | DAZAP2  | 695282 |
| DAZ interacting zinc finger protein 1-like                     | DZIP1L  | 716551 |
| Dcmp deaminase                                                 | DCTD    | 700995 |
| DC-STAMP domain containing 2                                   | DCST2   | 717224 |
| DDB1 and CUL4 associated factor 10                             | DCAF10  | 716256 |
| DDB1 and CUL4 associated factor 11                             | DCAF11  | 714867 |
| DEAD (Asp-Glu-Ala-Asp) box helicase 42                         | DDX42   | 717964 |
| DEAD (Asp-Glu-Ala-Asp) box polypeptide 19B                     | DDX19B  | 709576 |
| DEAD (Asp-Glu-Ala-Asp) box polypeptide 41                      | DDX41   | 700742 |
| DEAD (Asp-Glu-Ala-Asp) box polypeptide 50                      | DDX50   | 712511 |
| DEAD (Asp-Glu-Ala-Asp) box polypeptide 54                      | DDX54   | 712763 |
| Deafness, autosomal recessive 31                               | DFNB31  | 708051 |
| DEAH (Asp-Glu-Ala-Asp/His) box polypeptide 57                  | DHX57   | 713523 |
| DEAH (Asp-Glu-Ala-His) box polypeptide 38                      | DHX38   | 709173 |
| DEAH (Asp-Glu-Ala-His) box polypeptide 40                      | DHX40   | 715202 |
| Death-associated protein                                       | DAP     | 697362 |
| Decapping exoribonuclease                                      | DXO     | 716027 |
| Dedicator of cytokinesis 2                                     | DOCK2   | 704061 |
| Dedicator of cytokinesis 5                                     | DOCK5   | 711359 |
| Defensin beta 118                                              | DEFB118 | 641438 |
| Dehydrogenase/reductase (SDR family) member 3                  | DHRS3   | 715548 |
| Dehydrogenase/reductase (SDR family) member 7B                 | DHRS7B  | 704869 |
| Delta-like 2 homolog (Drosophila)                              | DLK2    | 700106 |
| DENN/MADD domain containing 4A                                 | DENND4A | 709675 |
| Denticleless E3 ubiquitin protein ligase homolog (Drosophila)  | DTL     | 711236 |
| Deoxyhypusine synthase                                         | DHPS    | 716213 |
| Dephospho-coa kinase domain containing                         | DCAKD   | 715841 |
| Diacylglycerol O-acyltransferase 1                             | DGAT1   | 701489 |
| Dihydropyrimidine dehydrogenase                                | DPYD    | 715672 |
| Dihydrouridine synthase 1-like                                 | DUS1L   | 715662 |
| Dipeptidase 2                                                  | DPEP2   | 701570 |
| Discoidin domain receptor tyrosine kinase 2                    | DDR2    | 720124 |
| Discs, large (Drosophila) homolog-associated protein 4         | DLGAP4  | 702928 |
| Dishevelled segment polarity protein 2                         | DVL2    | 714381 |
| Dishevelled-binding antagonist of beta-catenin 1               | DACT1   | 701218 |
| DMRT like family B with proline rich C-terminal 1              | DMRTB1  | 714424 |
| DNA cross-link repair 1A                                       | DCLRE1A | 697882 |
| Dnaj heat shock protein family (Hsp40) member B2               | DNAJB2  | 702936 |
| Dnaj heat shock protein family (Hsp40) member C15              | DNAJC15 | 700339 |
| Dnaj heat shock protein family (Hsp40) member C17              | DNAJC17 | 704013 |

|                                                                          |         |        |
|--------------------------------------------------------------------------|---------|--------|
| Dnaj heat shock protein family (Hsp40) member C27                        | DNAJC27 | 694037 |
| Dnaj heat shock protein family (Hsp40) member C3                         | DNAJC3  | 695757 |
| Docking protein 2                                                        | DOK2    | 706317 |
| Docking protein 5                                                        | DOK5    | 698689 |
| Dolichyl-phosphate mannosyltransferase polypeptide 2, regulatory subunit | DPM2    | 698709 |
| Dolichyl-phosphate mannosyltransferase polypeptide 3                     | DPM3    | 717446 |
| DR1-associated protein 1 (negative cofactor 2 alpha)                     | DRAP1   | 715271 |
| Drosha, ribonuclease type III                                            | DROSHA  | 692081 |
| DSN1 homolog, MIS12 kinetochore complex component                        | DSN1    | 702251 |
| DTW domain containing 1                                                  | DTWD1   | 715084 |
| DTW domain containing 2                                                  | DTWD2   | 697989 |
| Dual oxidase maturation factor 2                                         | DUOXA2  | 712992 |
| Dual specificity phosphatase 16                                          | DUSP16  | 696332 |
| Dual specificity phosphatase 22                                          | DUSP22  | 705824 |
| Dual specificity tyrosine-(Y)-phosphorylation regulated kinase 2         | DYRK2   | 717941 |
| Dynactin subunit 4                                                       | DCTN4   | 712783 |
| Dynactin subunit 6                                                       | DCTN6   | 694273 |
| Dynein regulatory complex subunit 3                                      | DRC3    | 699590 |
| Dynein, axonemal, intermediate chain 1                                   | DNAI1   | 701307 |
| Dyskeratosis congenita 1, dyskerin                                       | DKC1    | 702563 |
| Dystroglycan 1                                                           | DAG1    | 706179 |
| Dystrophia myotonica protein kinase                                      | DMPK    | 715328 |
| E1A binding protein p300                                                 | EP300   | 706258 |
| E74-like factor 2 (ets domain transcription factor)                      | ELF2    | 696760 |
| Ecotropic viral integration site 5-like                                  | EVI5L   | 706628 |
| Ectodysplasin A receptor                                                 | EDAR    | 695059 |
| EF-hand and coiled-coil domain containing 1                              | EFCC1   | 706444 |
| EF-hand calcium binding domain 11                                        | EFCAB11 | 695233 |
| EF-hand calcium binding domain 12                                        | EFCAB12 | 703176 |
| EF-hand domain family member D2                                          | EFHD2   | 694155 |
| EGF-like, fibronectin type III and laminin G domains                     | EGFLAM  | 693314 |
| EGF-like-domain, multiple 7                                              | EGFL7   | 709840 |
| EGF-like-domain, multiple 8                                              | EGFL8   | 717145 |
| Egl-9 family hypoxia-inducible factor 2                                  | EGLN2   | 703083 |
| EH domain containing 1                                                   | EHD1    | 722036 |
| EH domain containing 4                                                   | EHD4    | 707376 |
| Elastin microfibril interfacer 1                                         | EMILIN1 | 698204 |
| ELAV like neuron-specific RNA binding protein 2                          | ELAVL2  | 708195 |
| ELK1, member of ETS oncogene family                                      | ELK1    | 712610 |
| ELMO/CED-12 domain containing 3                                          | ELMOD3  | 695180 |
| ELOVL fatty acid elongase 4                                              | ELOVL4  | 692070 |
| Embryonal Fyn-associated substrate                                       | EFS     | 713838 |
| Emerin                                                                   | EMD     | 699400 |
| Empty spiracles homeobox 1                                               | EMX1    | 705441 |
| Endonuclease domain containing 1                                         | ENDOD1  | 699210 |
| Endoplasmic reticulum protein 27                                         | ERP27   | 700186 |

|                                                                     |           |        |
|---------------------------------------------------------------------|-----------|--------|
| Energy homeostasis associated                                       | ENHO      | 701072 |
| Enhancer of mrna decapping 3                                        | EDC3      | 709182 |
| Enhancer of polycomb homolog 2 (Drosophila)                         | EPC2      | 721916 |
| Enhancer of rudimentary homolog (Drosophila)                        | ERH       | 712507 |
| Enhancer of yellow 2 homolog (Drosophila)                           | ENY2      | 699048 |
| Enolase 1, (alpha)                                                  | ENO1      | 709378 |
| EP300 interacting inhibitor of differentiation 3                    | EID3      | 701175 |
| EPH receptor A2                                                     | EPHA2     | 692343 |
| EPH receptor B4                                                     | EPHB4     | 719320 |
| Ephrin-A3                                                           | EFNA3     | 717373 |
| Ephrin-B1                                                           | EFNB1     | 694149 |
| Epilepsy, progressive myoclonus type 2A, Lafora disease (laforin)   | EPM2A     | 699361 |
| Epithelial membrane protein 1                                       | EMP1      | 698319 |
| Epoxide hydrolase 1, microsomal (xenobiotic)                        | EPHX1     | 700180 |
| ER lipid raft associated 2                                          | ERLIN2    | 698126 |
| ER membrane protein complex subunit 10                              | EMC10     | 719285 |
| ERGIC and golgi 3                                                   | ERGIC3    | 704736 |
| ES cell expressed Ras                                               | ERAS      | 711442 |
| Ethanolamine kinase 2                                               | ETNK2     | 700683 |
| Ethylmalonic encephalopathy 1                                       | ETHE1     | 718089 |
| Eukaryotic elongation factor, selenocysteine-trna-specific          | EEFSEC    | 705784 |
| Eukaryotic translation elongation factor 1 beta 2                   | EEF1B2    | 707019 |
| Eukaryotic translation elongation factor 1 gamma                    | EEF1G     | 722274 |
| Eukaryotic translation elongation factor 2                          | EEF2      | 721806 |
| Eukaryotic translation initiation factor 2B subunit epsilon         | EIF2B5    | 703673 |
| Eukaryotic translation initiation factor 2B subunit gamma           | EIF2B3    | 705862 |
| Eukaryotic translation initiation factor 3 subunit B                | EIF3B     | 698481 |
| Eukaryotic translation initiation factor 3 subunit F                | EIF3F     | 706269 |
| Eukaryotic translation initiation factor 3 subunit I                | EIF3I     | 708145 |
| Eukaryotic translation initiation factor 3 subunit L                | EIF3L     | 699189 |
| Eukaryotic translation initiation factor 4E binding protein 1       | EIF4EBP1  | 703628 |
| Eukaryotic translation initiation factor 4E nuclear import factor 1 | EIF4ENIF1 | 716871 |
| Eukaryotic translation initiation factor 4H                         | EIF4H     | 693429 |
| Eva-1 homolog B (C. Elegans)                                        | EVA1B     | 713159 |
| EWS RNA binding protein 1                                           | EWSR1     | 714432 |
| Excision repair cross-complementation group 2                       | ERCC2     | 715485 |
| Exocyst complex component 2                                         | EXOC2     | 706296 |
| Exonuclease 5                                                       | EXO5      | 694536 |
| Exosome component 3                                                 | EXOSC3    | 716347 |
| Exosome component 4                                                 | EXOSC4    | 700012 |
| Exosome component 8                                                 | EXOSC8    | 695071 |
| Exostosin glycosyltransferase 1                                     | EXT1      | 701488 |
| Exportin 6                                                          | XPO6      | 704332 |
| Exportin, trna                                                      | XPOT      | 717375 |
| FAD-dependent oxidoreductase domain containing 1                    | FOXRED1   | 714271 |
| Family with sequence similarity 110 member B                        | FAM110B   | 703840 |

|                                                                            |         |           |
|----------------------------------------------------------------------------|---------|-----------|
| Family with sequence similarity 127, member A                              | FAM127A | 708766    |
| Family with sequence similarity 134 member A                               | FAM134A | 704378    |
| Family with sequence similarity 151 member B                               | FAM151B | 715256    |
| Family with sequence similarity 170 member A                               | FAM170A | 701046    |
| Family with sequence similarity 171 member B                               | FAM171B | 712442    |
| Family with sequence similarity 178 member B                               | FAM178B | 710890    |
| Family with sequence similarity 181 member B                               | FAM181B | 701184    |
| Family with sequence similarity 184 member A                               | FAM184A | 714658    |
| Family with sequence similarity 185 member A                               | FAM185A | 694971    |
| Family with sequence similarity 186 member B                               | FAM186B | 711001    |
| Family with sequence similarity 19 (chemokine (C-C motif)-like), member A5 | FAM19A5 | 107000696 |
| Family with sequence similarity 206 member A                               | FAM206A | 710486    |
| Family with sequence similarity 214 member B                               | FAM214B | 698214    |
| Family with sequence similarity 234 member A                               | FAM234A | 694729    |
| Family with sequence similarity 3 member A                                 | FAM3A   | 701159    |
| Family with sequence similarity 53 member C                                | FAM53C  | 714176    |
| Family with sequence similarity 57 member B                                | FAM57B  | 708210    |
| Family with sequence similarity 71 member C                                | FAM71C  | 694296    |
| Family with sequence similarity 83 member A                                | FAM83A  | 704023    |
| Family with sequence similarity 89 member B                                | FAM89B  | 721925    |
| Family with sequence similarity 91 member A1                               | FAM91A1 | 705119    |
| Fanconi anemia complementation group B                                     | FANCB   | 712083    |
| Fanconi anemia complementation group G                                     | FANCG   | 698837    |
| Fanconi anemia complementation group I                                     | FANCI   | 699878    |
| Fanconi anemia core complex associated protein 100                         | FAAP100 | 713876    |
| Far upstream element (FUSE) binding protein 3                              | FUBP3   | 722470    |
| Fas-activated serine/threonine kinase                                      | FASTK   | 714020    |
| Fat storage-inducing transmembrane protein 1                               | FITM1   | 715085    |
| Fatty acid desaturase 2                                                    | FADS2   | 719037    |
| FBJ murine osteosarcoma viral oncogene homolog                             | FOS     | 702077    |
| F-box and leucine-rich repeat protein 6                                    | FBXL6   | 701594    |
| F-box protein 6                                                            | FBXO6   | 722740    |
| F-box protein 7                                                            | FBXO7   | 717317    |
| Fc fragment of igg, high affinity Ia, receptor (CD64)                      | FCGR1A  | 714664    |
| Fc fragment of igg, receptor, transporter, alpha                           | FCGRT   | 718859    |
| Fc receptor-like A                                                         | FCRLA   | 720016    |
| Fc receptor-like B                                                         | FCRLB   | 720028    |
| Fem-1 homolog b (C. Elegans)                                               | FEM1B   | 693955    |
| Fermitin family member 3                                                   | FERMT3  | 722120    |
| Ferritin mitochondrial                                                     | FTMT    | 699743    |
| FGFR1 oncogene partner                                                     | FGFR1OP | 706749    |
| Fibroblast growth factor 20                                                | FGF20   | 701847    |
| Fibroblast growth factor receptor 1                                        | FGFR1   | 700126    |
| Fibroblast growth factor receptor substrate 3                              | FRS3    | 694462    |
| Fibronectin 1                                                              | FN1     | 613269    |
| Ficolin 2                                                                  | FCN2    | 712486    |
| Fidgetin-like 1                                                            | FIGNL1  | 694906    |

|                                                                                   |          |           |
|-----------------------------------------------------------------------------------|----------|-----------|
| Filamin A, alpha                                                                  | FLNA     | 699524    |
| Filamin binding LIM protein 1                                                     | FBLIM1   | 695727    |
| FK506 binding protein 10                                                          | FKBP10   | 707881    |
| FK506 binding protein 6                                                           | FKBP6    | 716306    |
| FK506 binding protein 8                                                           | FKBP8    | 720232    |
| FLYWCH-type zinc finger 1                                                         | FLYWCH1  | 700909    |
| Fms-related tyrosine kinase 3 ligand                                              | FLT3LG   | 719239    |
| Folate receptor 2 (fetal)                                                         | FOLR2    | 718405    |
| Follicular dendritic cell secreted protein                                        | FDCSP    | 707784    |
| Folliculogenesis specific bhlh transcription factor                               | FIGLA    | 710606    |
| Follistatin like 1                                                                | FSTL1    | 713367    |
| Forkhead box R2                                                                   | FOXR2    | 704032    |
| Forty-two-three domain containing 1                                               | FYTTD1   | 714705    |
| Four and a half LIM domains 3                                                     | FHL3     | 715313    |
| Fragile site, folic acid type, rare, fra(10)(q23.3) or fra(10)(q24.2) candidate 1 | FRA10AC1 | 700389    |
| Frataxin                                                                          | FXN      | 699469    |
| Frizzled class receptor 10                                                        | FZD10    | 717812    |
| Fructose-bisphosphatase 2                                                         | FBP2     | 100430824 |
| Fucokinase                                                                        | FUK      | 709226    |
| Fucosyltransferase 10 (alpha (1,3) fucosyltransferase)                            | FUT10    | 697659    |
| Fucosyltransferase 9 (alpha (1,3) fucosyltransferase)                             | FUT9     | 708361    |
| Fuzzy planar cell polarity protein                                                | FUZ      | 719442    |
| FXYP domain containing ion transport regulator 7                                  | FXYP7    | 718457    |
| FYN proto-oncogene, Src family tyrosine kinase                                    | FYN      | 574214    |
| FYVE, rhogef and PH domain containing 1                                           | FGD1     | 701134    |
| G protein pathway suppressor 1                                                    | GPS1     | 719343    |
| G protein-coupled bile acid receptor 1                                            | GPBAR1   | 697937    |
| G protein-coupled receptor 1                                                      | GPR1     | 707120    |
| G protein-coupled receptor 12                                                     | GPR12    | 710030    |
| G protein-coupled receptor 135                                                    | GPR135   | 701843    |
| G protein-coupled receptor 137                                                    | GPR137   | 717722    |
| G protein-coupled receptor 141                                                    | GPR141   | 705700    |
| G protein-coupled receptor 143                                                    | GPR143   | 709148    |
| G protein-coupled receptor 161                                                    | GPR161   | 698934    |
| G protein-coupled receptor 162                                                    | GPR162   | 100428264 |
| G protein-coupled receptor 173                                                    | GPR173   | 698645    |
| G protein-coupled receptor 182                                                    | GPR182   | 713866    |
| G protein-coupled receptor 19                                                     | GPR19    | 697072    |
| G protein-coupled receptor 3                                                      | GPR3     | 716033    |
| G protein-coupled receptor 31                                                     | GPR31    | 717158    |
| G protein-coupled receptor 50                                                     | GPR50    | 703817    |
| G protein-coupled receptor kinase 6                                               | GRK6     | 700000    |
| G protein-coupled receptor kinase 7                                               | GRK7     | 714916    |
| G protein-coupled receptor, class C, group 5, member B                            | GPRC5B   | 695204    |
| G protein-coupled receptor, class C, group 5, member D                            | GPRC5D   | 698898    |
| G2/M-phase specific E3 ubiquitin protein ligase                                   | G2E3     | 717021    |
| GABA(A) receptor-associated protein                                               | GABARAP  | 714597    |

|                                                                                               |        |        |
|-----------------------------------------------------------------------------------------------|--------|--------|
| Gamma-aminobutyric acid (GABA) B receptor, 1                                                  | GABBR1 | 708987 |
| Gamma-glutamylcyclotransferase                                                                | GGCT   | 695547 |
| Gamma-glutamyltransferase 5                                                                   | GGT5   | 720345 |
| Ganglioside induced differentiation associated protein 1                                      | GDAP1  | 697136 |
| Gap junction protein beta 4                                                                   | GJB4   | 710994 |
| Gastrulation brain homeobox 2                                                                 | GBX2   | 693901 |
| GCN1, eif2 alpha kinase activator homolog                                                     | GCN1   | 698528 |
| GDP-mannose pyrophosphorylase A                                                               | GMPPA  | 703756 |
| General transcription factor IIH subunit 4                                                    | GTF2H4 | 714285 |
| General transcription factor IIH subunit 5                                                    | GTF2H5 | 700107 |
| General transcription factor IIIC subunit 1                                                   | GTF3C1 | 703998 |
| General transcription factor IIIC subunit 5                                                   | GTF3C5 | 714489 |
| Germ cell-less, spermatogenesis associated 1                                                  | GMCL1  | 701545 |
| Germinal center-associated, signaling and motility                                            | GCSAM  | 707891 |
| GLE1, RNA export mediator                                                                     | GLE1   | 717474 |
| Glucagon-like peptide 2 receptor                                                              | GLP2R  | 717783 |
| Glucose 6 phosphatase, catalytic, 3                                                           | G6PC3  | 714276 |
| Glucose-6-phosphate dehydrogenase                                                             | G6PD   | 701137 |
| Glucose-fructose oxidoreductase domain containing 1                                           | GFOD1  | 700607 |
| Glucosidase, beta (bile acid) 2                                                               | GBA2   | 696062 |
| Glutamate receptor, ionotropic, kainate 1                                                     | GRIK1  | 705699 |
| Glutamate receptor, ionotropic, N-methyl D-aspartate-associated protein 1 (glutamate binding) | GRINA  | 708234 |
| Glutaminase                                                                                   | GLS    | 693520 |
| Glutaryl-coa dehydrogenase                                                                    | GCDH   | 716935 |
| Glutathione peroxidase 1                                                                      | GPX1   | 706732 |
| Glutathione peroxidase 4                                                                      | GPX4   | 705333 |
| Glutathione peroxidase 7                                                                      | GPX7   | 715474 |
| Glutathione peroxidase 8 (putative)                                                           | GPX8   | 705965 |
| Glutathione S-transferase alpha 4                                                             | GSTA4  | 709666 |
| Glutathione S-transferase kappa 1                                                             | GSTK1  | 704240 |
| Glutathione S-transferase mu 2 (muscle)                                                       | GSTM2  | 700053 |
| Glutathione S-transferase omega 2                                                             | GSTO2  | 715291 |
| Glutathione S-transferase pi 1                                                                | GSTP1  | 721704 |
| Glutathione S-transferase theta 2                                                             | GSTT2  | 700185 |
| Glyceraldehyde-3-phosphate dehydrogenase                                                      | GAPDH  | 574353 |
| Glyceraldehyde-3-phosphate dehydrogenase, spermatogenic                                       | GAPDHS | 709485 |
| Glycerol kinase 2                                                                             | GK2    | 696635 |
| Glycerophosphodiester phosphodiesterase 1                                                     | GDE1   | 694849 |
| Glycerophosphodiester phosphodiesterase domain containing 5                                   | GDPD5  | 695518 |
| Glycine receptor beta                                                                         | GLRB   | 700368 |
| Glycogen synthase 2                                                                           | GYS2   | 706152 |
| Glycoprotein (transmembrane) nmb                                                              | GPNMB  | 704990 |
| Glycosylated lysosomal membrane protein                                                       | GLMP   | 719468 |
| Glycosyltransferase 8 domain containing 2                                                     | GLT8D2 | 699937 |
| Golgi brefeldin A resistant guanine nucleotide exchange factor 1                              | GBF1   | 714579 |



|                                                                           |          |           |
|---------------------------------------------------------------------------|----------|-----------|
| Golgi phosphoprotein 3-like                                               | GOLPH3L  | 707858    |
| Golgi-associated, gamma adaptin ear containing, ARF binding protein 1     | GGA1     | 697929    |
| Golgi-associated, gamma adaptin ear containing, ARF binding protein 3     | GGA3     | 705751    |
| Granulysin                                                                | GNLY     | 696059    |
| Granzyme B                                                                | GZMB     | 716518    |
| GRB2-related adaptor protein                                              | GRAP     | 702473    |
| GRIP and coiled-coil domain containing 1                                  | GCC1     | 697975    |
| Group-specific component (vitamin D binding protein)                      | GC       | 705708    |
| Growth arrest and DNA damage inducible alpha                              | GADD45A  | 701054    |
| Growth arrest specific 2                                                  | GAS2     | 700952    |
| Growth arrest specific 2 like 1                                           | GAS2L1   | 714530    |
| Growth associated protein 43                                              | GAP43    | 711260    |
| Growth differentiation factor 15                                          | GDF15    | 719466    |
| Growth differentiation factor 3                                           | GDF3     | 715605    |
| Growth differentiation factor 7                                           | GDF7     | 702462    |
| Gse1 coiled-coil protein                                                  | GSE1     | 693298    |
| Gtpase, IMAP family member 1                                              | GIMAP1   | 100424488 |
| Guanidinoacetate N-methyltransferase                                      | GAMT     | 721263    |
| Guanine nucleotide binding protein (G protein), alpha 14                  | GNA14    | 705448    |
| Guanine nucleotide binding protein (G protein), beta polypeptide 1        | GNB1     | 703399    |
| Guanine nucleotide binding protein (G protein), beta polypeptide 2-like 1 | GNB2L1   | 708526    |
| Guanine nucleotide binding protein (G protein), beta polypeptide 3        | GNB3     | 713913    |
| Guanine nucleotide binding protein (G protein), gamma 2                   | GNG2     | 710000    |
| Guanine nucleotide binding protein (G protein), gamma 5                   | GNG5     | 710548    |
| Guanylate cyclase activator 1B                                            | GUCA1B   | 695658    |
| Guanylate kinase 1                                                        | GUK1     | 695272    |
| H19, imprinted maternally expressed transcript (non-protein coding)       | H19      | 704308    |
| H2A histone family, member J                                              | H2AFJ    | 701863    |
| H2A histone family, member Y2                                             | H2AFY2   | 711117    |
| H2A histone family, member Z                                              | H2AFZ    | 709326    |
| Haloacid dehalogenase like hydrolase domain containing 3                  | HDHD3    | 705447    |
| HAUS augmin like complex subunit 8                                        | HAUS8    | 718874    |
| HCLS1 associated protein X-1                                              | HAX1     | 716495    |
| Heat shock factor binding protein 1                                       | HSBP1    | 714498    |
| Heat shock protein 90kda alpha family class B member 1                    | HSP90AB1 | 702293    |
| Heat shock protein family B (small) member 1                              | HSPB1    | 715615    |
| Heat shock protein family B (small) member 11                             | HSPB11   | 714791    |
| Heat shock protein family B (small) member 6                              | HSPB6    | 710760    |
| Heat shock transcription factor 2                                         | HSF2     | 713938    |
| HECT domain containing E3 ubiquitin protein ligase 2                      | HECTD2   | 697258    |
| Helicase (DNA) B                                                          | HELB     | 717860    |
| Hematological and neurological expressed 1-like                           | HN1L     | 702283    |

|                                                                         |           |           |
|-------------------------------------------------------------------------|-----------|-----------|
| Hematopoietic cell signal transducer                                    | HCST      | 574152    |
| Hematopoietic cell-specific Lyn substrate 1                             | HCLS1     | 714044    |
| Hematopoietic prostaglandin D synthase                                  | HPGDS     | 705227    |
| Heme oxygenase 2                                                        | HMOX2     | 705461    |
| Hemogen                                                                 | HEMGN     | 715562    |
| Hemoglobin subunit alpha 1                                              | HBA1      | 701930    |
| Hemoglobin subunit epsilon 1                                            | HBE1      | 715414    |
| Hemoglobin, gamma G                                                     | HBG2      | 715368    |
| HEN1 methyltransferase homolog 1 (Arabidopsis)                          | HENMT1    | 698896    |
| Hepatocyte growth factor (hepapoietin A; scatter factor)                | HGF       | 708316    |
| Hepcidin antimicrobial peptide                                          | HAMP      | 708397    |
| Hexamethylene bis-acetamide inducible 1                                 | HEXIM1    | 716006    |
| HIG1 hypoxia inducible domain family member 1B                          | HIGD1B    | 715566    |
| Histocompatibility (minor) 13                                           | HM13      | 713216    |
| Histone cluster 1, h2aj                                                 | HIST1H2AJ | 704127    |
| Histone deacetylase 3                                                   | HDAC3     | 704467    |
| Histone deacetylase 5                                                   | HDAC5     | 711456    |
| Histone deacetylase 6                                                   | HDAC6     | 711363    |
| Homeobox D12                                                            | HOXD12    | 100428776 |
| Homeodomain interacting protein kinase 1                                | HIPK1     | 707856    |
| Homer scaffolding protein 3                                             | HOMER3    | 719647    |
| Host cell factor C2                                                     | HCFC2     | 700316    |
| HRAS like suppressor family member 5                                    | HRASLS5   | 718317    |
| Hyaluronan and proteoglycan link protein 3                              | HAPLN3    | 698880    |
| Hyaluronan synthase 1                                                   | HAS1      | 719773    |
| Hydrogen voltage gated channel 1                                        | HVCN1     | 709745    |
| Hydroxyacid oxidase 2 (long chain)                                      | HAO2      | 712615    |
| Hydroxypyruvate isomerase (putative)                                    | HYI       | 700926    |
| Hydroxysteroid dehydrogenase like 2                                     | HSDL2     | 707233    |
| Hyperpolarization activated cyclic nucleotide gated potassium channel 3 | HCN3      | 717719    |
| Hypocretin (orexin) neuropeptide precursor                              | HCRT      | 709564    |
| Iduronidase, alpha-L-                                                   | IDUA      | 106998224 |
| IKAROS family zinc finger 1                                             | IKZF1     | 693936    |
| IKAROS family zinc finger 3                                             | IKZF3     | 698083    |
| ILK associated serine/threonine phosphatase                             | ILKAP     | 706334    |
| Ilvb (bacterial acetolactate synthase)-like                             | ILVBL     | 718086    |
| Immunoglobulin superfamily member 10                                    | IGSF10    | 709661    |
| IMP (inosine 5'-monophosphate) dehydrogenase 2                          | IMPDH2    | 708307    |
| IMP3, U3 small nucleolar ribonucleoprotein                              | IMP3      | 706202    |
| Importin 5                                                              | IPO5      | 697448    |
| Importin 9                                                              | IPO9      | 707210    |
| Inhibin alpha                                                           | INHA      | 574379    |
| Inhibitor of growth family member 1                                     | ING1      | 694955    |
| Inner centromere protein                                                | INCENP    | 722320    |
| Inositol polyphosphate phosphatase like 1                               | INPPL1    | 718421    |
| Inositol-3-phosphate synthase 1                                         | ISYNA1    | 719487    |
| Insulin like 3                                                          | INSL3     | 100533192 |

|                                                                    |         |           |
|--------------------------------------------------------------------|---------|-----------|
| Insulin like 6                                                     | INSL6   | 693735    |
| Insulin like growth factor 1 receptor                              | IGF1R   | 708227    |
| Insulin like growth factor binding protein 4                       | IGFBP4  | 700963    |
| Insulin like growth factor binding protein 7                       | IGFBP7  | 693564    |
| Integrator complex subunit 5                                       | INTS5   | 719124    |
| Integrator complex subunit 7                                       | INTS7   | 711152    |
| Integrin linked kinase                                             | ILK     | 709944    |
| Integrin subunit alpha 1                                           | ITGA1   | 703456    |
| Integrin subunit alpha 2b                                          | ITGA2B  | 714955    |
| Integrin subunit alpha V                                           | ITGAV   | 707756    |
| Integrin subunit beta like 1                                       | ITGBL1  | 700965    |
| Integrin-binding sialoprotein                                      | IBSP    | 701835    |
| Intercellular adhesion molecule 1                                  | ICAM1   | 712280    |
| Intercellular adhesion molecule 4 (Landsteiner-Wiener blood group) | ICAM4   | 712354    |
| Intercellular adhesion molecule 5                                  | ICAM5   | 720495    |
| Interferon regulatory factor 2                                     | IRF2    | 694347    |
| Interferon regulatory factor 2 binding protein 1                   | IRF2BP1 | 715611    |
| Interferon regulatory factor 3                                     | IRF3    | 718970    |
| Interferon stimulated exonuclease gene 20kda like 2                | ISG20L2 | 718621    |
| Interferon, alpha 2                                                | IFNA2   | 709948    |
| Interferon, gamma-inducible protein 16                             | IFI16   | 719253    |
| Interleukin 1 receptor accessory protein                           | IL1RAP  | 574387    |
| Interleukin 17 receptor E                                          | IL17RE  | 698972    |
| Interleukin 18                                                     | IL18    | 574151    |
| Interleukin 2 receptor subunit gamma                               | IL2RG   | 641338    |
| Interleukin 21 receptor                                            | IL21R   | 705759    |
| Interleukin 22                                                     | IL22    | 718047    |
| Interleukin enhancer binding factor 3                              | ILF3    | 713427    |
| Intestine-specific homeobox                                        | ISX     | 717448    |
| Intraflagellar transport 172                                       | IFT172  | 700948    |
| Intraflagellar transport 20                                        | IFT20   | 715773    |
| Intraflagellar transport 57                                        | IFT57   | 705088    |
| Inturned planar cell polarity protein                              | INTU    | 709967    |
| IQ motif containing K                                              | IQCK    | 695417    |
| IQ motif containing with AAA domain 1                              | IQCA1   | 694173    |
| Iroquois homeobox 6                                                | IRX6    | 698232    |
| Isocitrate dehydrogenase 3 (NAD+) beta                             | IDH3B   | 716726    |
| Isocitrate dehydrogenase 3 (NAD+) gamma                            | IDH3G   | 698558    |
| Jagunal homolog 1                                                  | JAGN1   | 699718    |
| Jumonji domain containing 1C                                       | JMJD1C  | 697630    |
| Junction adhesion molecule like                                    | JAML    | 704919    |
| Junctophilin 1                                                     | JPH1    | 697014    |
| Kaptein (actin binding protein)                                    | KPTN    | 717322    |
| Karyopherin alpha 2 (RAG cohort 1, importin alpha 1)               | KPNA2   | 100430008 |
| Katanin p60 subunit A-like 1                                       | KATNAL1 | 712636    |
| KDEL endoplasmic reticulum protein retention receptor 1            | KDELRL1 | 717928    |
| KDEL endoplasmic reticulum protein retention receptor 2            | KDELRL2 | 704335    |

|                                                                  |           |           |
|------------------------------------------------------------------|-----------|-----------|
| KDEL motif containing 1                                          | KDELC1    | 702156    |
| Kelch domain containing 10                                       | KLHDC10   | 702290    |
| Kelch domain containing 8B                                       | KLHDC8B   | 707348    |
| Kelch like family member 11                                      | KLHL11    | 708393    |
| Kelch like family member 18                                      | KLHL18    | 711943    |
| Kelch like family member 2                                       | KLHL2     | 704790    |
| Kelch like family member 25                                      | KLHL25    | 697129    |
| Kelch like family member 40                                      | KLHL40    | 717366    |
| Kelch like family member 9                                       | KLHL9     | 710804    |
| Kell blood group, metallo-endopeptidase                          | KEL       | 703492    |
| Keratin 14, type I                                               | KRT14     | 100426176 |
| Keratin 2, type II                                               | KRT2      | 699567    |
| Keratin 222, type II                                             | KRT222    | 701557    |
| Keratin 25, type I                                               | KRT25     | 701915    |
| Keratin 4, type II                                               | KRT4      | 700060    |
| Keratin associated protein 12-4                                  | KRTAP12-4 | 712284    |
| Keratin associated protein 22-1                                  | KRTAP22-1 | 100428224 |
| Keratocan                                                        | KERA      | 709743    |
| KIAA0040 ortholog                                                | KIAA0040  | 100423512 |
| KIAA0141 ortholog                                                | KIAA0141  | 702802    |
| KIAA0355 ortholog                                                | KIAA0355  | 705202    |
| KIAA2013 ortholog                                                | KIAA2013  | 722762    |
| Killer cell lectin-like receptor subfamily B, member 1           | KLRB1     | 100430784 |
| Kin17 DNA and RNA binding protein                                | KIN       | 713634    |
| Kinesin family member 1C                                         | KIF1C     | 721601    |
| Kinesin family member 22                                         | KIF22     | 706401    |
| Kinesin heavy chain member 2A                                    | KIF2A     | 696561    |
| Kininogen 1                                                      | KNG1      | 707466    |
| KRAB-A domain containing 1                                       | KRBA1     | 711863    |
| Kv channel interacting protein 2                                 | KCNIP2    | 712434    |
| L-3-hydroxyproline dehydratase (trans-)                          | L3HYPDH   | 702076    |
| Lactate dehydrogenase A                                          | LDHA      | 694309    |
| Lamin A/C                                                        | LMNA      | 719414    |
| Laminin subunit beta 2                                           | LAMB2     | 707892    |
| Lanc lantibiotic synthetase component C-like 2 (bacterial)       | LANCL2    | 704882    |
| Late cornified envelope 3C                                       | LCE3C     | 100423544 |
| Late cornified envelope 5A                                       | LCE5A     | 100423328 |
| Late endosomal/lysosomal adaptor, MAPK and MTOR activator 2      | LAMTOR2   | 718110    |
| LCK proto-oncogene, Src family tyrosine kinase                   | LCK       | 717704    |
| LDL receptor related protein 2                                   | LRP2      | 705786    |
| LDL receptor related protein 3                                   | LRP3      | 703776    |
| Lectin, galactoside-binding, soluble, 7B                         | LGALS7B   | 694781    |
| LETM1 domain containing 1                                        | LETMD1    | 694422    |
| Leucine rich repeat and coiled-coil centrosomal protein 1        | LRRCC1    | 707964    |
| Leucine rich repeat and fibronectin type III domain containing 3 | LRFN3     | 711565    |
| Leucine rich repeat and fibronectin type III domain              | LRFN4     | 713166    |

|                                                                                          |         |           |
|------------------------------------------------------------------------------------------|---------|-----------|
| containing 4                                                                             |         |           |
| Leucine rich repeat and fibronectin type III domain containing 5                         | LRFN5   | 700512    |
| Leucine rich repeat containing 28                                                        | LRRC28  | 708649    |
| Leucine rich repeat containing 36                                                        | LRRC36  | 697849    |
| Leucine rich repeat containing 42                                                        | LRRC42  | 714839    |
| Leucine rich repeat containing 45                                                        | LRRC45  | 715420    |
| Leucine rich repeat containing 61                                                        | LRRC61  | 704779    |
| Leucine rich repeat containing 73                                                        | LRRC73  | 700361    |
| Leucine rich repeat neuronal 1                                                           | LRRN1   | 703993    |
| Leucine rich repeat protein 1                                                            | LRR1    | 706658    |
| Leucine rich repeat transmembrane neuronal 3                                             | LRRTM3  | 696536    |
| Leucine zipper, down-regulated in cancer 1                                               | LDOC1   | 696902    |
| Leucine zipper, putative tumor suppressor 2                                              | LZTS2   | 711279    |
| Leucine-rich repeats and calponin homology (CH) domain containing 2                      | LRCH2   | 708436    |
| Leucine-rich repeats and immunoglobulin-like domains 3                                   | LRIG3   | 716344    |
| Leucine-rich repeats and WD repeat domain containing 1                                   | LRWD1   | 715187    |
| Leukocyte immunoglobulin-like receptor, subfamily A, member b                            | LILRAB  | 692334    |
| Leukocyte immunoglobulin-like receptor, subfamily B (with TM and ITIM domains), member 1 | LILRB1  | 692340    |
| Leukocyte receptor cluster (LRC) member 1                                                | LENG1   | 693417    |
| Leukocyte specific transcript 1                                                          | LST1    | 100141392 |
| Leukocyte-associated immunoglobulin-like receptor 1                                      | LAIR1   | 695533    |
| Leukotriene C4 synthase                                                                  | LTC4S   | 705233    |
| Leupaxin                                                                                 | LPXN    | 702033    |
| Ligase I, DNA, ATP-dependent                                                             | LIG1    | 718528    |
| Ligase IV, DNA, ATP-dependent                                                            | LIG4    | 695475    |
| LIM and cysteine-rich domains 1                                                          | LMCD1   | 702382    |
| LIM domain binding 1                                                                     | LDB1    | 712653    |
| LIM domain binding 2                                                                     | LDB2    | 714918    |
| Limb development membrane protein 1-like                                                 | LMBR1L  | 709548    |
| Lin-28 homolog B (C. Elegans)                                                            | LIN28B  | 696130    |
| Linker for activation of T-cells family member 2                                         | LAT2    | 693676    |
| Lipocalin 1                                                                              | LCN1    | 711974    |
| Lipoma HMGIC fusion partner-like 2                                                       | LHFPL2  | 709040    |
| Lipopolysaccharide-induced TNF factor                                                    | LITAF   | 711743    |
| Liver expressed antimicrobial peptide 2                                                  | LEAP2   | 709041    |
| Low density lipoprotein receptor adaptor protein 1                                       | LDLRAP1 | 713032    |
| LSM12 homolog                                                                            | LSM12   | 714219    |
| LSM14A mrna processing body assembly factor                                              | LSM14A  | 705085    |
| LSM5 homolog, U6 small nuclear RNA and mRNA degradation associated                       | LSM5    | 693550    |
| Ly6/neurotoxin 1                                                                         | LYNX1   | 100428512 |
| Lymphocyte antigen 6 complex, locus E                                                    | LY6E    | 696037    |
| Lymphocyte antigen 6 complex, locus G6C                                                  | LY6G6C  | 716220    |
| LYR motif containing 2                                                                   | LYRM2   | 701575    |

|                                                                             |          |           |
|-----------------------------------------------------------------------------|----------|-----------|
| Lysine (K)-specific demethylase 4B                                          | KDM4B    | 695760    |
| Lysine (K)-specific demethylase 8                                           | KDM8     | 703323    |
| Lysine-rich nucleolar protein 1                                             | KNOP1    | 695144    |
| Lysophosphatidylcholine acyltransferase 4                                   | LPCAT4   | 696388    |
| Lysophospholipase II                                                        | LYPLA2   | 719074    |
| Lysozyme-like 4                                                             | LYZL4    | 716549    |
| Lysyl oxidase like 1                                                        | LOXL1    | 706464    |
| MACRO domain containing 1                                                   | MACROD1  | 717961    |
| MAD2 mitotic arrest deficient-like 2 (yeast)                                | MAD2L2   | 714527    |
| MAD2L1 binding protein                                                      | MAD2L1BP | 701099    |
| MAF1 homolog, negative regulator of RNA polymerase III                      | MAF1     | 700385    |
| MAGE family member D2                                                       | MAGED2   | 701719    |
| Mago homolog, exon junction complex core component                          | MAGOH    | 714261    |
| Major facilitator superfamily domain containing 14B                         | MFSD14B  | 708498    |
| Major histocompatibility complex, class I, A                                | MAMU-A3  | 699243    |
| Major histocompatibility complex, class I, E                                | MAMU-E   | 711532    |
| Male-enhanced antigen 1                                                     | MEA1     | 699300    |
| Mannose receptor, C type 1                                                  | MRC1     | 701010    |
| Mannosidase, alpha, class 1B, member 1                                      | MAN1B1   | 706918    |
| Mannosidase, alpha, class 2B, member 1                                      | MAN2B1   | 716173    |
| Mannosidase, beta A, lysosomal                                              | MANBA    | 712531    |
| Mannosidase, beta A, lysosomal-like                                         | MANBAL   | 701167    |
| Mannosyl (alpha-1,3-)-glycoprotein beta-1,2-N-acetylglucosaminyltransferase | MGAT1    | 707375    |
| Mannosyl (alpha-1,6-)-glycoprotein beta-1,6-N-acetylglucosaminyltransferase | MGAT5    | 709108    |
| MAP7 domain containing 1                                                    | MAP7D1   | 712899    |
| MAP-kinase activating death domain                                          | MADD     | 713613    |
| MARVEL domain containing 1                                                  | MARVELD1 | 708237    |
| MAS-related GPR, member X4                                                  | MRGPRX4  | 692123    |
| Matrilin 1, cartilage matrix protein                                        | MATN1    | 704521    |
| Matrin 3                                                                    | MATR3    | 100568448 |
| Matrix metalloproteinase 2                                                  | MMP2     | 698478    |
| Matrix-remodelling associated 5                                             | MXRA5    | 706214    |
| Mdm1 nuclear protein                                                        | MDM1     | 718062    |
| MDM2 binding protein                                                        | MTBP     | 703121    |
| Mediator complex subunit 11                                                 | MED11    | 709561    |
| Mediator complex subunit 27                                                 | MED27    | 715219    |
| Mediator complex subunit 4                                                  | MED4     | 704644    |
| Mediator complex subunit 6                                                  | MED6     | 693320    |
| Mediator complex subunit 8                                                  | MED8     | 700676    |
| Meiosis 1 associated protein                                                | M1AP     | 710210    |
| Meiosis specific with OB domains                                            | MEIOB    | 703322    |
| Melatonin receptor 1A                                                       | MTNR1A   | 702686    |
| Melatonin receptor 1B                                                       | MTNR1B   | 695629    |
| Membrane bound transcription factor peptidase, site 2                       | MBTPS2   | 696540    |
| Membrane frizzled-related protein                                           | MFRP     | 704965    |
| Membrane protein, palmitoylated 4                                           | MPP4     | 702459    |

|                                                                            |          |           |
|----------------------------------------------------------------------------|----------|-----------|
| Meprin A subunit beta                                                      | MEP1B    | 707036    |
| Mesoderm induction early response 1, family member 2                       | MIER2    | 701450    |
| Metallo-beta-lactamase domain containing 2                                 | MBLAC2   | 695437    |
| Metallothionein 3                                                          | MT3      | 700602    |
| Metaxin 1                                                                  | MTX1     | 717595    |
| Methionine sulfoxide reductase B3                                          | MSRB3    | 717617    |
| Methylphosphate capping enzyme                                             | MEPCE    | 711829    |
| Methyltransferase like 2A                                                  | METTL2A  | 717533    |
| Microfibrillar associated protein 2                                        | MFAP2    | 710885    |
| Microtubule associated monooxygenase, calponin and LIM domain containing 1 | MICAL1   | 698737    |
| Microtubule associated protein 1 light chain 3 alpha                       | MAP1LC3A | 707439    |
| Microtubule associated protein 1S                                          | MAP1S    | 719196    |
| Microtubule associated protein 2                                           | MAP2     | 710840    |
| Midline 1                                                                  | MID1     | 709683    |
| Midnolin                                                                   | MIDN     | 721215    |
| Mitochondrial carrier 1                                                    | MTCH1    | 719313    |
| Mitochondrial E3 ubiquitin protein ligase 1                                | MUL1     | 705429    |
| Mitochondrial elongation factor 2                                          | MIEF2    | 700705    |
| Mitochondrial ribosomal protein L11                                        | MRPL11   | 714094    |
| Mitochondrial ribosomal protein L18                                        | MRPL18   | 702629    |
| Mitochondrial ribosomal protein L23                                        | MRPL23   | 704210    |
| Mitochondrial ribosomal protein L34                                        | MRPL34   | 719004    |
| Mitochondrial ribosomal protein L36                                        | MRPL36   | 100430880 |
| Mitochondrial ribosomal protein L37                                        | MRPL37   | 715168    |
| Mitochondrial ribosomal protein L41                                        | MRPL41   | 702768    |
| Mitochondrial ribosomal protein L42                                        | MRPL42   | 715676    |
| Mitochondrial ribosomal protein L43                                        | MRPL43   | 711038    |
| Mitochondrial ribosomal protein L53                                        | MRPL53   | 709302    |
| Mitochondrial ribosomal protein L9                                         | MRPL9    | 711235    |
| Mitochondrial ribosomal protein S18C                                       | MRPS18C  | 707257    |
| Mitochondrial ribosomal protein S21                                        | MRPS21   | 706805    |
| Mitochondrial ribosomal protein S24                                        | MRPS24   | 700722    |
| Mitochondrial ribosomal protein S9                                         | MRPS9    | 712968    |
| Mitochondrial trans-2-enoyl-coa reductase                                  | MECR     | 717425    |
| Mitogen-activated protein kinase 11                                        | MAPK11   | 715794    |
| Mitogen-activated protein kinase 12                                        | MAPK12   | 715745    |
| Mitogen-activated protein kinase 7                                         | MAPK7    | 702837    |
| Mitogen-activated protein kinase 8                                         | MAPK8    | 711115    |
| Mitogen-activated protein kinase associated protein 1                      | MAPKAP1  | 702599    |
| Mitogen-activated protein kinase kinase 2                                  | MAP2K2   | 721821    |
| Mitogen-activated protein kinase kinase kinase 6                           | MAP3K6   | 715911    |
| Mitogen-activated protein kinase kinase kinase kinase 1                    | MAP4K1   | 694259    |
| Mitogen-activated protein kinase kinase kinase kinase 2                    | MAP4K2   | 699331    |
| Molybdenum cofactor synthesis 2                                            | MOCS2    | 703689    |
| Monoacylglycerol O-acyltransferase 2                                       | MOGAT2   | 696347    |
| MORC family CW-type zinc finger 4                                          | MORC4    | 701136    |
| Mov10 RISC complex RNA helicase                                            | MOV10    | 705910    |

|                                                                                                    |         |         |
|----------------------------------------------------------------------------------------------------|---------|---------|
| MPV17 mitochondrial membrane protein-like 2                                                        | MPV17L2 | 719413  |
| Msh homeobox 2                                                                                     | MSX2    | 694227  |
| Mucolipin 1                                                                                        | MCOLN1  | 703775  |
| Multiple C2 domains, transmembrane 2                                                               | MCTP2   | 706949  |
| Multivesicular body subunit 12A                                                                    | MVB12A  | 716261  |
| Murine retrovirus integration site 1 homolog                                                       | MRVI1   | 702830  |
| Muscle, skeletal, receptor tyrosine kinase                                                         | MUSK    | 709397  |
| Myb/SANT-like DNA-binding domain containing 4<br>with coiled-coils                                 | MSANTD4 | 706055  |
| MYC associated factor X                                                                            | MAX     | 708228  |
| MYCBP-associated, testis expressed 1                                                               | MAATS1  | 712979  |
| Myelin regulatory factor                                                                           | MYRF    | 719083  |
| Myeloid cell nuclear differentiation antigen                                                       | MNDA    | 719220  |
| Myeloid/lymphoid or mixed-lineage leukemia;<br>translocated to, 6                                  | MLLT6   | 694045  |
| Myod family inhibitor                                                                              | MDFI    | 694074  |
| Myosin binding protein H-like                                                                      | MYBPHL  | 698183  |
| Myosin IA                                                                                          | MYO1A   | 714033  |
| Myosin light chain 4                                                                               | MYL4    | 717354  |
| Myosin light chain 6                                                                               | MYL6    | 711889  |
| Myosin XVIIIa                                                                                      | MYO18A  | 711171  |
| Myotubularin 1                                                                                     | MTM1    | 703131  |
| Myotubularin related protein 2                                                                     | MTMR2   | 699703  |
| N(alpha)-acetyltransferase 35, natc auxiliary subunit                                              | NAA35   | 710122  |
| N-6 adenine-specific DNA methyltransferase 2 (putative)                                            | N6AMT2  | 703665  |
| N-acetylglucosamine-1-phosphate transferase, gamma<br>subunit                                      | GNPTG   | 722441  |
| N-acetylglutamate synthase                                                                         | NAGS    | 714102  |
| N-acetyltransferase 8-like (GCN5-related, putative)                                                | NAT8L   | 722359  |
| N-acetyltransferase 9 (GCN5-related, putative)                                                     | NAT9    | 699085  |
| NAD(P)H dehydrogenase, quinone 2                                                                   | NQO2    | 707675  |
| NADH dehydrogenase subunit 1                                                                       | ND1     | 2846627 |
| NADH:ubiquinone oxidoreductase complex assembly<br>factor 4                                        | NDUFAF4 | 705102  |
| NADH:ubiquinone oxidoreductase subunit A12                                                         | NDUFA12 | 711970  |
| NADH:ubiquinone oxidoreductase subunit B7                                                          | NDUFB7  | 717849  |
| NADPH oxidase organizer 1                                                                          | NOXO1   | 694059  |
| Natriuretic peptide receptor 2                                                                     | NPR2    | 695750  |
| Natural killer cell granule protein 7                                                              | NKG7    | 719624  |
| NEDD4 binding protein 2                                                                            | N4BP2   | 700365  |
| Nedd4 family interacting protein 1                                                                 | NDFIP1  | 705716  |
| Negative elongation factor complex member C/D                                                      | NELFCD  | 696053  |
| Negative elongation factor complex member E                                                        | NELFE   | 716913  |
| Netrin G2                                                                                          | NTNG2   | 715127  |
| Neural precursor cell expressed, developmentally down-<br>regulated 1                              | NEDD1   | 713673  |
| Neural precursor cell expressed, developmentally down-<br>regulated 4, E3 ubiquitin protein ligase | NEDD4   | 699550  |



|                                                                      |         |           |
|----------------------------------------------------------------------|---------|-----------|
| Neural precursor cell expressed, developmentally down-regulated 8    | NEDD8   | 715763    |
| Neural precursor cell expressed, developmentally down-regulated 9    | NEDD9   | 699359    |
| Neural proliferation, differentiation and control, 1                 | NPDC1   | 707453    |
| Neurensin 1                                                          | NRSN1   | 707362    |
| Neuritin 1                                                           | NRN1    | 722968    |
| Neuroglobin                                                          | NGB     | 641331    |
| Neuroigin 2                                                          | NLGN2   | 574368    |
| Neuroigin 3                                                          | NLGN3   | 574216    |
| Neuroigin 4, Y-linked                                                | NLGN4Y  | 100270696 |
| Neuronal differentiation 1                                           | NEUROD1 | 704954    |
| Neuronal PAS domain protein 2                                        | NPAS2   | 710480    |
| Neuronal PAS domain protein 3                                        | NPAS3   | 717281    |
| Neuronal PAS domain protein 4                                        | NPAS4   | 714161    |
| Neuronal regeneration related protein                                | NREP    | 712463    |
| Neuronal tyrosine-phosphorylated phosphoinositide-3-kinase adaptor 1 | NYAP1   | 719205    |
| Neuropeptide FF-amide peptide precursor                              | NPFF    | 703412    |
| Neuropilin and tolloid like 1                                        | NETO1   | 694322    |
| Neutrophil cytosolic factor 4                                        | NCF4    | 695612    |
| NFKB inhibitor interacting Ras-like 1                                | NKIRAS1 | 699598    |
| NGG1 interacting factor 3 like 1                                     | NIF3L1  | 700572    |
| N-glycanase 1                                                        | NGLY1   | 700842    |
| NHL repeat containing 2                                              | NHLRC2  | 698009    |
| Nicotinamide nucleotide transhydrogenase                             | NNT     | 701110    |
| Nidogen 1                                                            | NID1    | 711154    |
| NIM1 serine/threonine protein kinase                                 | NIM1K   | 699870    |
| Ninein                                                               | NIN     | 709532    |
| Ninjurin 1                                                           | NINJ1   | 717218    |
| NK2 homeobox 5                                                       | NKX2-5  | 703795    |
| NKG2D protein                                                        | NKG2D   | 574240    |
| NLR family member X1                                                 | NLRX1   | 703981    |
| NLR family, pyrin domain containing 1                                | NLRP1   | 721648    |
| NLR family, pyrin domain containing 10                               | NLRP10  | 709794    |
| NLR family, pyrin domain containing 3                                | NLRP3   | 701278    |
| NLR family, pyrin domain containing 4                                | NLRP4   | 703431    |
| NLR family, pyrin domain containing 9                                | NLRP9   | 719115    |
| N-myristoyltransferase 1                                             | NMT1    | 715885    |
| NOC2-like nucleolar associated transcriptional repressor             | NOC2L   | 697809    |
| Non-SMC condensin I complex subunit D2                               | NCAPD2  | 712834    |
| Non-SMC condensin I complex subunit G                                | NCAPG   | 715235    |
| Non-SMC condensin II complex subunit H2                              | NCAPH2  | 716120    |
| NPL4 homolog, ubiquitin recognition factor                           | NPLOC4  | 713927    |
| N-terminal asparagine amidase                                        | NTAN1   | 100427568 |
| N-terminal Xaa-Pro-Lys N-methyltransferase 1                         | NTMT1   | 716763    |
| Nth-like DNA glycosylase 1                                           | NTHL1   | 694848    |
| Nuclear casein kinase and cyclin-dependent kinase                    | NUCKS1  | 697298    |

|                                                                                 |        |           |
|---------------------------------------------------------------------------------|--------|-----------|
| substrate 1                                                                     |        |           |
| Nuclear factor of kappa light polypeptide gene enhancer in B-cells 1            | NFKB1  | 710324    |
| Nuclear factor of kappa light polypeptide gene enhancer in B-cells 2 (p49/p100) | NFKB2  | 714689    |
| Nuclear pore associated protein 1                                               | NPAP1  | 719891    |
| Nuclear receptor binding SET domain protein 1                                   | NSD1   | 706131    |
| Nuclear receptor subfamily 1 group H member 3                                   | NR1H3  | 713679    |
| Nuclear receptor subfamily 1 group I member 2                                   | NR1I2  | 574226    |
| Nuclear RNA export factor 3                                                     | NXF3   | 695351    |
| Nuclear transcription factor Y subunit alpha                                    | NFYA   | 719697    |
| Nucleic acid binding protein 2                                                  | NABP2  | 709344    |
| Nucleoporin 50kda                                                               | NUP50  | 713282    |
| Nucleosome assembly protein 1-like 3                                            | NAP1L3 | 697636    |
| Nude neurodevelopment protein 1-like 1                                          | NDEL1  | 721973    |
| Nudix hydrolase 1                                                               | NUDT1  | 713078    |
| Nudix hydrolase 22                                                              | NUDT22 | 717864    |
| Olfactomedin 2                                                                  | OLFM2  | 711336    |
| Olfactory receptor, family 1, subfamily Q, member 1                             | OR1Q1  | 697695    |
| Olfactory receptor, family 10, subfamily A, member 4                            | OR10A4 | 100423176 |
| Olfactory receptor, family 2, subfamily AG, member 2                            | OR2AG2 | 709556    |
| Olfactory receptor, family 2, subfamily F, member 1                             | OR2F1  | 707900    |
| Olfactory receptor, family 2, subfamily H, member 2                             | OR2H2  | 710946    |
| Olfactory receptor, family 2, subfamily W, member 1                             | OR2W1  | 708515    |
| Olfactory receptor, family 4, subfamily E, member 2                             | OR4E2  | 708887    |
| Olfactory receptor, family 4, subfamily N, member 2                             | OR4N2  | 701881    |
| Olfactory receptor, family 5, subfamily F, member 1                             | OR5F1  | 709943    |
| Olfactory receptor, family 5, subfamily L, member 1                             | OR5L1  | 719174    |
| Olfactory receptor, family 5, subfamily M, member 9                             | OR5M9  | 705878    |
| Olfactory receptor, family 52, subfamily N, member 4                            | OR52N4 | 696970    |
| Olfactory receptor, family 7, subfamily D, member 4                             | OR7D4  | 721322    |
| Olfactory receptor, family 9, subfamily I, member 1                             | OR9I1  | 703649    |
| Oncomodulin 2                                                                   | OCM2   | 721827    |
| Origin recognition complex subunit 5                                            | ORC5   | 696683    |
| ORMDL sphingolipid biosynthesis regulator 2                                     | ORMDL2 | 710296    |
| Ornithine decarboxylase antizyme 2                                              | OAZ2   | 707593    |
| Osteosarcoma amplified 9, endoplasmic reticulum lectin                          | OS9    | 715555    |
| Outer dense fiber of sperm tails 1                                              | ODF1   | 707269    |
| Outer dense fiber of sperm tails 3                                              | ODF3   | 696480    |
| Outer dense fiber of sperm tails 3-like 1                                       | ODF3L1 | 706545    |
| Oviductal glycoprotein 1                                                        | OVGP1  | 703848    |
| Oxoeicosanoid (OXE) receptor 1                                                  | OXER1  | 713039    |
| Oxysterol binding protein like 5                                                | OSBPL5 | 706613    |
| P21 protein (Cdc42/Rac)-activated kinase 1                                      | PAK1   | 698585    |
| P450 (cytochrome) oxidoreductase                                                | POR    | 715888    |
| P53 and DNA damage regulated 1                                                  | PDRG1  | 712622    |
| Paired box 9                                                                    | PAX9   | 100429088 |
| Palmitoyl-protein thioesterase 1                                                | PPT1   | 693377    |

|                                                              |          |           |
|--------------------------------------------------------------|----------|-----------|
| Pancreatic and duodenal homeobox 1                           | PDX1     | 710936    |
| Pancreatic polypeptide                                       | PPY      | 713988    |
| Pantothenate kinase 2                                        | PANK2    | 717639    |
| Pantothenate kinase 4                                        | PANK4    | 694804    |
| PAP associated domain containing 7                           | PAPD7    | 713853    |
| Par-3 family cell polarity regulator                         | PARD3    | 706472    |
| Paralemmin 2                                                 | PALM2    | 100532752 |
| Paraneoplastic Ma antigen 1                                  | PNMA1    | 697618    |
| Paraneoplastic Ma antigen 3                                  | PNMA3    | 694406    |
| Parathyroid hormone 1 receptor                               | PTH1R    | 712147    |
| Parvin gamma                                                 | PARVG    | 712624    |
| PC-esterase domain containing 1A                             | PCED1A   | 716956    |
| PCI domain containing 2                                      | PCID2    | 714247    |
| PDLIM1 interacting kinase 1 like                             | PDIK1L   | 719774    |
| PDZ and LIM domain 1                                         | PDLIM1   | 702998    |
| PDZ domain containing 4                                      | PDZD4    | 697387    |
| Peptidoglycan recognition protein 3                          | PGLYRP3  | 714583    |
| Peptidyl arginine deiminase, type III                        | PADI3    | 700560    |
| Peptidylprolyl isomerase B (cyclophilin B)                   | PPIB     | 706757    |
| Peptidylprolyl isomerase F                                   | PPIF     | 574137    |
| Periaxin                                                     | PRX      | 702329    |
| Peroxiredoxin 2                                              | PRDX2    | 716665    |
| Peroxisomal biogenesis factor 16                             | PEX16    | 714904    |
| Peroxisomal biogenesis factor 6                              | PEX6     | 697597    |
| PHD finger protein 1                                         | PHF1     | 718337    |
| PHD finger protein 14                                        | PHF14    | 694855    |
| PHD finger protein 19                                        | PHF19    | 704050    |
| PHD finger protein 21A                                       | PHF21A   | 714798    |
| Phenylalanine hydroxylase                                    | PAH      | 698696    |
| Phenylalanyl-trna synthetase alpha subunit                   | FARSA    | 716878    |
| Phosphatase and actin regulator 1                            | PHACTR1  | 700226    |
| Phosphatase and actin regulator 4                            | PHACTR4  | 716990    |
| Phosphatase, orphan 1                                        | PHOSPHO1 | 698959    |
| Phosphatase, orphan 2                                        | PHOSPHO2 | 100429656 |
| Phosphate cytidylyltransferase 1, choline, alpha             | PCYT1A   | 722105    |
| Phosphate cytidylyltransferase 1, choline, beta              | PCYT1B   | 701760    |
| Phosphatidylethanolamine binding protein 1                   | PEBP1    | 694697    |
| Phosphatidylinositol 4-kinase, catalytic, beta               | PI4KB    | 710104    |
| Phosphatidylinositol glycan anchor biosynthesis class H      | PIGH     | 710780    |
| Phosphatidylinositol glycan anchor biosynthesis class S      | PIGS     | 709115    |
| Phosphatidylinositol transfer protein alpha                  | PITPNA   | 721228    |
| Phosphatidylinositol transfer protein, membrane associated 1 | PITPNM1  | 721716    |
| Phosphodiesterase 11A                                        | PDE11A   | 702458    |
| Phosphodiesterase 6D                                         | PDE6D    | 712629    |
| Phosphodiesterase 9A                                         | PDE9A    | 100301992 |
| Phosphofructokinase, muscle                                  | PFKM     | 707806    |
| Phosphofurin acidic cluster sorting protein 1                | PACS1    | 714696    |

|                                                              |          |           |
|--------------------------------------------------------------|----------|-----------|
| Phosphofurin acidic cluster sorting protein 2                | PACS2    | 709722    |
| Phospholipase A2 group IB                                    | PLA2G1B  | 696712    |
| Phospholipase A2 group XIIB                                  | PLA2G12B | 708031    |
| Phospholipase A2 group XV                                    | PLA2G15  | 702619    |
| Phospholipase A2 group XVI                                   | PLA2G16  | 722178    |
| Phospholipase B domain containing 1                          | PLBD1    | 698939    |
| Phospholipase B domain containing 2                          | PLBD2    | 714669    |
| Phospholipase C beta 2                                       | PLCB2    | 701951    |
| Phospholipase C delta 1                                      | PLCD1    | 696860    |
| Phospholipase D family member 3                              | PLD3     | 701083    |
| Phospholipid phosphatase 7 (inactive)                        | PLPP7    | 722411    |
| Phospholipid scramblase 3                                    | PLSCR3   | 721831    |
| Phosphoribosyl pyrophosphate synthetase 1-like 1             | PRPS1L1  | 708413    |
| Pituitary tumor-transforming 1 interacting protein           | PTTG1IP  | 722061    |
| Placental growth factor                                      | PGF      | 701219    |
| Placenta-specific 1-like                                     | PLAC1L   | 698074    |
| Plastin 1                                                    | PLS1     | 714391    |
| Platelet derived growth factor D                             | PDGFD    | 704310    |
| Platelet-derived growth factor beta polypeptide              | PDGFB    | 703173    |
| Pleckstrin and Sec7 domain containing                        | PSD      | 714737    |
| Pleckstrin homology domain containing A8                     | PLEKHA8  | 696127    |
| Pleckstrin homology domain containing J1                     | PLEKHJ1  | 710129    |
| Pleckstrin homology domain containing O1                     | PLEKHO1  | 706145    |
| Plectin                                                      | PLEC     | 699517    |
| Poliovirus receptor-related 2 (herpesvirus entry mediator B) | PVRL2    | 713229    |
| Polo-like kinase 1                                           | PLK1     | 697686    |
| Poly(A) binding protein, cytoplasmic 1                       | PABPC1   | 705847    |
| Poly(A) binding protein, cytoplasmic 3                       | PABPC3   | 708617    |
| Poly(ADP-ribose) glycohydrolase                              | PARG     | 709432    |
| Poly(ADP-ribose) polymerase family member 10                 | PARP10   | 708132    |
| Poly(rc) binding protein 2                                   | PCBP2    | 703175    |
| Poly(rc) binding protein 4                                   | PCBP4    | 699225    |
| Poly(U) binding splicing factor 60kda                        | PUF60    | 699008    |
| Polybromo 1                                                  | PBRM1    | 696361    |
| Polycomb group ring finger 2                                 | PCGF2    | 694187    |
| Polyglutamine binding protein 1                              | PQBP1    | 711678    |
| Polyhomeotic homolog 2 (Drosophila)                          | PHC2     | 710201    |
| Polymerase (DNA directed), alpha 2, accessory subunit        | POLA2    | 716541    |
| Polymerase (DNA directed), delta 2, accessory subunit        | POLD2    | 700100    |
| Polymerase (DNA directed), epsilon 3, accessory subunit      | POLE3    | 705074    |
| Polymerase (RNA) II (DNA directed) polypeptide H             | POLR2H   | 100429040 |
| Polymerase (RNA) II (DNA directed) polypeptide I, 14.5kda    | POLR2I   | 712412    |
| Polymerase (RNA) III (DNA directed) polypeptide C (62kd)     | POLR3C   | 696943    |
| Polymerase (RNA) III (DNA directed) polypeptide H (22.9kd)   | POLR3H   | 707546    |
| Polymerase (RNA) mitochondrial (DNA directed)                | POLRMT   | 100426184 |
| Polynucleotide kinase 3'-phosphatase                         | PNKP     | 719084    |
| POP7 homolog, ribonuclease P/MRP subunit                     | POP7     | 712859    |
| Post-GPI attachment to proteins 3                            | PGAP3    | 697699    |

|                                                                                                 |          |           |
|-------------------------------------------------------------------------------------------------|----------|-----------|
| Potassium channel tetramerization domain containing 10                                          | KCTD10   | 707443    |
| Potassium channel tetramerization domain containing 18                                          | KCTD18   | 699824    |
| Potassium channel tetramerization domain containing 3                                           | KCTD3    | 708471    |
| Potassium channel tetramerization domain containing 9                                           | KCTD9    | 711515    |
| Potassium channel, calcium activated intermediate/small conductance subfamily N alpha, member 1 | KCNN1    | 720091    |
| Potassium channel, two pore domain subfamily K, member 16                                       | KCNK16   | 719585    |
| Potassium channel, voltage gated modifier subfamily V, member 1                                 | KCNV1    | 699636    |
| Potassium channel, voltage gated shaker related subfamily A, member 5                           | KCNA5    | 711886    |
| Potassium channel, voltage gated Shal related subfamily D, member 1                             | KCND1    | 711997    |
| Potassium channel, voltage gated Shaw related subfamily C, member 2                             | KCNC2    | 100430904 |
| Potassium voltage-gated channel, modifier subfamily S, member 1                                 | KCNS1    | 711715    |
| PQ loop repeat containing 3                                                                     | PQLC3    | 696961    |
| PR domain containing 14                                                                         | PRDM14   | 693324    |
| PR domain containing 2, with ZNF domain                                                         | PRDM2    | 716295    |
| PRA1 domain family member 2                                                                     | PRAF2    | 712436    |
| Pre-B-cell leukemia homeobox 1                                                                  | PBX1     | 694416    |
| PRELI domain containing 1                                                                       | PRELID1  | 699254    |
| Premelanosome protein                                                                           | PMEL     | 710921    |
| Pre-mrna processing factor 3                                                                    | PRPF3    | 706898    |
| Prenyl (decaprenyl) diphosphate synthase, subunit 1                                             | PDSS1    | 707598    |
| Presenilin enhancer gamma secretase subunit                                                     | PSEENEN  | 100429008 |
| Presequence translocase-associated motor 16 homolog (S. Cerevisiae)                             | PAM16    | 704987    |
| Prickle homolog 1                                                                               | PRICKLE1 | 701864    |
| Prickle homolog 3                                                                               | PRICKLE3 | 715644    |
| Procollagen-lysine, 2-oxoglutarate 5-dioxygenase 1                                              | PLOD1    | 722763    |
| Profilin 1                                                                                      | PFN1     | 710753    |
| Progestin and adipoq receptor family member VII                                                 | PAQR7    | 713411    |
| Progestin and adipoq receptor family member VIII                                                | PAQR8    | 708418    |
| Prolactin regulatory element binding                                                            | PREB     | 700408    |
| Prolactin releasing hormone                                                                     | PRLH     | 694941    |
| Proline rich 3                                                                                  | PRR3     | 711699    |
| Proline rich 7 (synaptic)                                                                       | PRR7     | 700123    |
| Proline rich Gla (G-carboxyglutamic acid) 1                                                     | PRRG1    | 696938    |
| Proline rich membrane anchor 1                                                                  | PRIMA1   | 100426272 |
| Proline, glutamate and leucine rich protein 1                                                   | PELP1    | 677854    |
| Proline-rich coiled-coil 2A                                                                     | PRRC2A   | 715715    |
| Prolyl 3-hydroxylase 1                                                                          | P3H1     | 697917    |
| Prolyl 4-hydroxylase, transmembrane (endoplasmic reticulum)                                     | P4HTM    | 708158    |
| Prominin 1                                                                                      | PROM1    | 714610    |

|                                                                                                           |          |           |
|-----------------------------------------------------------------------------------------------------------|----------|-----------|
| Promyelocytic leukemia                                                                                    | PML      | 700379    |
| Proprotein convertase subtilisin/kexin type 7                                                             | PCSK7    | 697567    |
| Prosaposin                                                                                                | PSAP     | 709510    |
| Prostaglandin D2 synthase                                                                                 | PTGDS    | 707990    |
| Prostaglandin E synthase 3                                                                                | PTGES3   | 713353    |
| Prostaglandin I2 (prostacyclin) receptor (IP)                                                             | PTGIR    | 716546    |
| Protease, serine 27                                                                                       | PRSS27   | 697848    |
| Protease, serine 37                                                                                       | PRSS37   | 694908    |
| Protease, serine 55                                                                                       | PRSS55   | 698379    |
| Proteasomal ATPase associated factor 1                                                                    | PAAF1    | 718755    |
| Proteasome subunit alpha 4                                                                                | PSMA4    | 710417    |
| Proteasome subunit beta 2                                                                                 | PSMB2    | 712193    |
| Proteasome subunit beta 3                                                                                 | PSMB3    | 694318    |
| Protein disulfide isomerase family A member 2                                                             | PDIA2    | 694964    |
| Protein inhibitor of activated STAT 2                                                                     | PIAS2    | 696737    |
| Protein inhibitor of activated STAT 3                                                                     | PIAS3    | 706775    |
| Protein kinase C and casein kinase substrate in neurons 1                                                 | PACSN1   | 718624    |
| Protein kinase C and casein kinase substrate in neurons 3                                                 | PACSN3   | 713919    |
| Protein kinase C, alpha                                                                                   | PRKCA    | 718412    |
| Protein kinase C, theta                                                                                   | PRKCQ    | 722559    |
| Protein kinase N3                                                                                         | PKN3     | 717319    |
| Protein kinase, camp-dependent, regulatory subunit type II beta                                           | PRKAR2B  | 700770    |
| Protein phosphatase 1 regulatory subunit 12B                                                              | PPP1R12B | 705775    |
| Protein phosphatase 1 regulatory subunit 12C                                                              | PPP1R12C | 698538    |
| Protein phosphatase 1 regulatory subunit 15A                                                              | PPP1R15A | 718350    |
| Protein phosphatase 1 regulatory subunit 16A                                                              | PPP1R16A | 702995    |
| Protein phosphatase 1 regulatory subunit 16B                                                              | PPP1R16B | 693349    |
| Protein phosphatase 2 regulatory subunit A, alpha                                                         | PPP2R1A  | 719929    |
| Protein phosphatase 3, catalytic subunit, beta isozyme                                                    | PPP3CB   | 706955    |
| Protein phosphatase 3, catalytic subunit, gamma isozyme                                                   | PPP3CC   | 708233    |
| Protein phosphatase 4 catalytic subunit                                                                   | PPP4C    | 708510    |
| Protein phosphatase 5, catalytic subunit                                                                  | PPP5C    | 716214    |
| Protein phosphatase methylesterase 1                                                                      | PPME1    | 718858    |
| Protein S (alpha)                                                                                         | PROS1    | 694845    |
| Protein serine kinase H2                                                                                  | PSKH2    | 693701    |
| Protein tyrosine phosphatase domain containing 1                                                          | PTPDC1   | 707878    |
| Protein tyrosine phosphatase type IVA, member 2                                                           | PTP4A2   | 706489    |
| Protein tyrosine phosphatase, non-receptor type 20                                                        | PTPN20   | 711276    |
| Protein tyrosine phosphatase, non-receptor type 23                                                        | PTPN23   | 711601    |
| Protein tyrosine phosphatase, receptor type, f polypeptide (PTPRF), interacting protein (liprin), alpha 2 | PPFIA2   | 698065    |
| Protein-O-mannosyltransferase 2                                                                           | POMT2    | 705604    |
| Protocadherin alpha 5                                                                                     | PCDHA5   | 692083    |
| Protocadherin beta 4                                                                                      | PCDHB4   | 700373    |
| Protoporphyrinogen oxidase                                                                                | PPOX     | 719910    |
| Pseudouridylate synthase 3                                                                                | PUS3     | 713746    |
| Purinergic receptor P2Y, G-protein coupled, 11                                                            | P2RY11   | 100533472 |

|                                                                                         |          |           |
|-----------------------------------------------------------------------------------------|----------|-----------|
| Putative homeodomain transcription factor 2                                             | PHTF2    | 693552    |
| PYD and CARD domain containing                                                          | PYCARD   | 713563    |
| PYM homolog 1, exon junction complex associated factor                                  | PYM1     | 708148    |
| Pyridine nucleotide-disulphide oxidoreductase domain 2                                  | PYROXD2  | 707797    |
| Pyrroline-5-carboxylate reductase family member 2                                       | PYCR2    | 699808    |
| Pyruvate dehydrogenase kinase, isozyme 2                                                | PDK2     | 704169    |
| Pyruvate dehydrogenase phosphatase regulatory subunit                                   | PDPR     | 709861    |
| Quiescin sulfhydryl oxidase 1                                                           | QSOX1    | 718589    |
| Rab acceptor 1 (prenylated)                                                             | RABAC1   | 706397    |
| RAB, member of RAS oncogene family-like 2B                                              | RABL2B   | 716615    |
| RAB, member of RAS oncogene family-like 3                                               | RABL3    | 713621    |
| RAB1B, member RAS oncogene family                                                       | RAB1B    | 721852    |
| RAB38, member RAS oncogene family                                                       | RAB38    | 705189    |
| RAB3A, member RAS oncogene family                                                       | RAB3A    | 719400    |
| RAB5B, member RAS oncogene family                                                       | RAB5B    | 708347    |
| RAB6A, member RAS oncogene family                                                       | RAB6A    | 718717    |
| RAB8B, member RAS oncogene family                                                       | RAB8B    | 705597    |
| RAD21 cohesin complex component                                                         | RAD21    | 700633    |
| RAD9 checkpoint clamp component A                                                       | RAD9A    | 712345    |
| Ral gtpase activating protein, alpha subunit 1 (catalytic)                              | RALGAPA1 | 695674    |
| Ral gtpase activating protein, beta subunit (non-catalytic)                             | RALGAPB  | 705742    |
| Ral guanine nucleotide dissociation stimulator-like 1                                   | RGL1     | 717554    |
| RALY heterogeneous nuclear ribonucleoprotein                                            | RALY     | 713317    |
| RAN binding protein 10                                                                  | RANBP10  | 700911    |
| Ran gtpase activating protein 1                                                         | RANGAP1  | 710698    |
| Ranbp-type and C3HC4-type zinc finger containing 1                                      | RBCK1    | 714692    |
| Rap guanine nucleotide exchange factor 2                                                | RAPGEF2  | 704717    |
| Ras and Rab interactor 3                                                                | RIN3     | 698125    |
| Ras homolog family member A                                                             | RHOA     | 706455    |
| Ras homolog family member C                                                             | RHOC     | 706034    |
| Ras homolog family member J                                                             | RHOJ     | 705603    |
| RAS p21 protein activator 2                                                             | RASA2    | 715074    |
| RAS protein activator like 2                                                            | RASAL2   | 718958    |
| Rasgef domain family member 1C                                                          | RASGEF1C | 706085    |
| RAS-like family 10 member B                                                             | RASL10B  | 716171    |
| Ras-related C3 botulinum toxin substrate 2 (rho family, small GTP binding protein Rac2) | RAC2     | 696709    |
| Ras-related C3 botulinum toxin substrate 3 (rho family, small GTP binding protein Rac3) | RAC3     | 719305    |
| Ras-related GTP binding A                                                               | RRAGA    | 100430224 |
| RBPI interacting and tubulin associated 1                                               | RITA1    | 712837    |
| Reactive oxygen species modulator 1                                                     | ROMO1    | 711369    |
| Receptor (chemosensory) transporter protein 3                                           | RTP3     | 713050    |
| Receptor (G protein-coupled) activity modifying protein 1                               | RAMP1    | 574329    |
| Receptor accessory protein 4                                                            | REEP4    | 707267    |
| Receptor interacting serine/threonine kinase 3                                          | RIPK3    | 716138    |
| Receptor tyrosine kinase-like orphan receptor 2                                         | ROR2     | 715482    |
| Recq helicase-like                                                                      | RECQL    | 705871    |

|                                                           |          |           |
|-----------------------------------------------------------|----------|-----------|
| Regenerating family member 3 gamma                        | REG3G    | 711637    |
| Regulator of calcineurin 1                                | RCAN1    | 697108    |
| Regulator of G-protein signaling 10                       | RGS10    | 703125    |
| Regulator of G-protein signaling 14                       | RGS14    | 699625    |
| Regulator of G-protein signaling 18                       | RGS18    | 712896    |
| Regulator of G-protein signaling 19                       | RGS19    | 719265    |
| Regulatory factor X associated ankyrin containing protein | RFXANK   | 719706    |
| Relaxin/insulin-like family peptide receptor 4            | RXFP4    | 718025    |
| Renin                                                     | REN      | 574299    |
| Replication factor C subunit 3                            | RFC3     | 714220    |
| Replication initiator 1                                   | REPIN1   | 712920    |
| Replication protein A1                                    | RPA1     | 721272    |
| Replication protein A3                                    | RPA3     | 696248    |
| Required for meiotic nuclear division 1 homolog           | RMND1    | 704665    |
| Resistin                                                  | RETN     | 708781    |
| REST corepressor 1                                        | RCOR1    | 694670    |
| Ret proto-oncogene                                        | RET      | 703466    |
| Retinal outer segment membrane protein 1                  | ROM1     | 100426296 |
| Retinoic acid induced 14                                  | RAI14    | 698620    |
| Retinoic acid receptor responder (tazarotene induced) 2   | RARRES2  | 704993    |
| Retinol dehydrogenase 5 (11-cis/9-cis)                    | RDH5     | 709644    |
| RFT1 homolog                                              | RFT1     | 694586    |
| Rh family, C glycoprotein                                 | RHCG     | 664731    |
| Rho GDP dissociation inhibitor (GDI) beta                 | ARHGDIB  | 702320    |
| Rho gtpase activating protein 24                          | ARHGAP24 | 699614    |
| Rho gtpase activating protein 30                          | ARHGAP30 | 718236    |
| Rho gtpase activating protein 9                           | ARHGAP9  | 711684    |
| Rho guanine nucleotide exchange factor 1                  | ARHGEF1  | 722198    |
| Rho guanine nucleotide exchange factor 17                 | ARHGEF17 | 718644    |
| Rho/Rac guanine nucleotide exchange factor 2              | ARHGEF2  | 719369    |
| Ribonuclease H2 subunit B                                 | RNASEH2B | 707995    |
| Ribonuclease P/MRP 21kda subunit                          | RPP21    | 713056    |
| Ribonuclease T2                                           | RNASET2  | 706533    |
| Ribonuclease, rnase A family, 1 (pancreatic)              | RNASE1   | 704676    |
| Ribonuclease, rnase A family, 9 (non-active)              | RNASE9   | 703346    |
| Ribonucleic acid export 1                                 | RAE1     | 696706    |
| Ribonucleoprotein, PTB-binding 1                          | RAVER1   | 715250    |
| Ribophorin II                                             | RPN2     | 708971    |
| Ribosomal modification protein rimk-like family member A  | RIMKLA   | 699767    |
| Ribosomal protein L10 like                                | RPL10L   | 702986    |
| Ribosomal protein l10a                                    | RPL10A   | 718783    |
| Ribosomal protein L17                                     | RPL17    | 698967    |
| Ribosomal protein L23                                     | RPL23    | 694719    |
| Ribosomal protein l23a                                    | RPL23A   | 710490    |
| Ribosomal protein L24                                     | RPL24    | 702381    |
| Ribosomal protein L26                                     | RPL26    | 717378    |
| Ribosomal protein l27a                                    | RPL27A   | 708863    |
| Ribosomal protein L29                                     | RPL29    | 698602    |



|                                                                |         |           |
|----------------------------------------------------------------|---------|-----------|
| Ribosomal protein L3                                           | RPL3    | 707176    |
| Ribosomal protein L3 like                                      | RPL3L   | 693424    |
| Ribosomal protein l35a                                         | RPL35A  | 714858    |
| Ribosomal protein L4                                           | RPL4    | 710590    |
| Ribosomal protein l7a                                          | RPL7A   | 722215    |
| Ribosomal protein L8                                           | RPL8    | 708535    |
| Ribosomal protein S10                                          | RPS10   | 718606    |
| Ribosomal protein S11                                          | RPS11   | 718844    |
| Ribosomal protein S13                                          | RPS13   | 697513    |
| Ribosomal protein S14                                          | RPS14   | 710901    |
| Ribosomal protein S15                                          | RPS15   | 707241    |
| Ribosomal protein S16                                          | RPS16   | 697219    |
| Ribosomal protein S2                                           | RPS2    | 693615    |
| Ribosomal protein S21                                          | RPS21   | 699565    |
| Ribosomal protein S27                                          | RPS27   | 106992520 |
| Ribosomal protein S28                                          | RPS28   | 707133    |
| Ribosomal protein S4, X-linked                                 | RPS4X   | 699397    |
| Ribosomal protein S5                                           | RPS5    | 711259    |
| Ribosomal protein S6 kinase, 90kda, polypeptide 4              | RPS6KA4 | 717574    |
| Ribosomal protein S7                                           | RPS7    | 721900    |
| Ribosomal protein S8                                           | RPS8    | 703957    |
| Ribosomal protein S9                                           | RPS9    | 694053    |
| Ribosomal protein, large, P0                                   | RPLP0   | 574363    |
| Ribosomal protein, large, P1                                   | RPLP1   | 695442    |
| Ribosomal protein, large, P2                                   | RPLP2   | 700698    |
| Ribosomal RNA processing 8, methyltransferase, homolog (yeast) | RRP8    | 712011    |
| Ribosome binding protein 1                                     | RRBP1   | 698019    |
| Ribulose-5-phosphate-3-epimerase                               | RPE     | 711322    |
| Ring finger protein 10                                         | RNF10   | 697428    |
| Ring finger protein 167                                        | RNF167  | 710656    |
| Ring finger protein 181                                        | RNF181  | 695977    |
| Ring finger protein 208                                        | RNF208  | 705563    |
| Ring finger protein 26                                         | RNF26   | 704755    |
| Ring finger protein 32                                         | RNF32   | 716703    |
| Ring finger protein 38                                         | RNF38   | 693346    |
| Ring finger protein 40, E3 ubiquitin protein ligase            | RNF40   | 713148    |
| Ring finger protein, transmembrane 1                           | RNFT1   | 712052    |
| Ripply transcriptional repressor 3                             | RIPPLY3 | 100429272 |
| RNA binding motif protein 18                                   | RBM18   | 698457    |
| RNA binding motif protein 19                                   | RBM19   | 715724    |
| RNA binding motif protein 38                                   | RBM38   | 696583    |
| RNA binding motif protein 42                                   | RBM42   | 709852    |
| RNA binding motif protein 45                                   | RBM45   | 702714    |
| RNA binding motif protein 7                                    | RBM7    | 695401    |
| RNA binding motif, single stranded interacting protein 1       | RBMS1   | 703608    |
| RNA binding motif, single stranded interacting protein 2       | RBMS2   | 713163    |
| RNA binding protein, fox-1 homolog (C. Elegans) 2              | RBFOX2  | 693642    |

|                                                                                 |           |           |
|---------------------------------------------------------------------------------|-----------|-----------|
| RNA pseudouridylate synthase domain containing 3                                | RPUSD3    | 700349    |
| RPTOR independent companion of MTOR, complex 2                                  | RICTOR    | 694915    |
| SAC3 domain containing 1                                                        | SAC3D1    | 717043    |
| SAGA complex associated factor 29                                               | SGF29     | 709124    |
| SAM domain, SH3 domain and nuclear localization signals 1                       | SAMSN1    | 694064    |
| SAMM50 sorting and assembly machinery component                                 | SAMM50    | 715675    |
| Sarcoglycan zeta                                                                | SGCZ      | 100430472 |
| Sarcosine dehydrogenase                                                         | SARDH     | 713289    |
| SAS-6 centriolar assembly protein                                               | SASS6     | 711310    |
| Scavenger receptor class F member 2                                             | SCARF2    | 695466    |
| Schlafen like 1                                                                 | SLFNL1    | 695605    |
| SEC11 homolog A, signal peptidase complex subunit                               | SEC11A    | 695951    |
| SEC16 homolog B, endoplasmic reticulum export factor                            | SEC16B    | 709635    |
| SEC22 homolog C, vesicle trafficking protein                                    | SEC22C    | 716351    |
| Sec23 homolog A, COPII coat complex component                                   | SEC23A    | 698500    |
| SEC31 homolog A, COPII coat complex component                                   | SEC31A    | 693687    |
| Sec61 translocon alpha 2 subunit                                                | SEC61A2   | 100427728 |
| SECIS binding protein 2-like                                                    | SECISBP2L | 714764    |
| Secreted frizzled-related protein 4                                             | SFRP4     | 574393    |
| Secretory carrier membrane protein 2                                            | SCAMP2    | 709720    |
| Selenoprotein M                                                                 | SELM      | 718290    |
| Sema domain, transmembrane domain (TM), and cytoplasmic domain, (semaphorin) 6C | SEMA6C    | 709464    |
| Sepiapterin reductase (7,8-dihydrobiopterin:NADP+ oxidoreductase)               | SPR       | 705317    |
| Serine dehydratase-like                                                         | SDSL      | 714721    |
| Serine/threonine kinase 11 interacting protein                                  | STK11IP   | 704531    |
| Serine/threonine kinase 16                                                      | STK16     | 702715    |
| Serine/threonine kinase 31                                                      | STK31     | 703886    |
| Serine/threonine kinase 32C                                                     | STK32C    | 100426744 |
| Serine/threonine kinase 38                                                      | STK38     | 719169    |
| Serologically defined colon cancer antigen 3                                    | SDCCAG3   | 721750    |
| Serpin peptidase inhibitor, clade B (ovalbumin), member 10                      | SERPINB10 | 100430160 |
| Serpin peptidase inhibitor, clade B (ovalbumin), member 7                       | SERPINB7  | 701671    |
| Serpin peptidase inhibitor, clade C (antithrombin), member 1                    | SERPINC1  | 708854    |
| Serrate, RNA effector molecule                                                  | SRRT      | 713235    |
| SET domain containing 9                                                         | SETD9     | 708019    |
| SFI1 centrin binding protein                                                    | SFI1      | 716833    |
| SH2 domain containing 3C                                                        | SH2D3C    | 699706    |
| SH2B adaptor protein 1                                                          | SH2B1     | 708160    |
| SH3 and cysteine rich domain                                                    | STAC      | 707350    |
| SH3-domain binding protein 1                                                    | SH3BP1    | 700647    |
| SHANK associated RH domain interactor                                           | SHARPIN   | 713534    |
| Siah E3 ubiquitin protein ligase 1                                              | SIAH1     | 716629    |
| Signal peptide, CUB domain, EGF-like 2                                          | SCUBE2    | 708152    |
| Signal recognition particle 68kda                                               | SRP68     | 705568    |
| Signal sequence receptor, delta                                                 | SSR4      | 697266    |
| Signal transducer and activator of transcription 4                              | STAT4     | 693854    |

|                                                                                             |          |           |
|---------------------------------------------------------------------------------------------|----------|-----------|
| Signal transducer and activator of transcription 5A                                         | STAT5A   | 574129    |
| Sin3A associated protein 25kda                                                              | SAP25    | 106997576 |
| Single stranded DNA binding protein 4                                                       | SSBP4    | 719496    |
| SKI-like proto-oncogene                                                                     | SKIL     | 696680    |
| SLIT and NTRK like family member 1                                                          | SLITRK1  | 699217    |
| SLIT and NTRK like family member 5                                                          | SLITRK5  | 705032    |
| SLX1 homolog A, structure-specific endonuclease subunit                                     | SLX1A    | 709225    |
| SMAD family member 4                                                                        | SMAD4    | 701803    |
| SMAD family member 9                                                                        | SMAD9    | 694572    |
| Small integral membrane protein 13                                                          | SMIM13   | 703387    |
| Small integral membrane protein 19                                                          | SMIM19   | 705371    |
| Small nuclear ribonucleoprotein polypeptide E                                               | SNRPE    | 701418    |
| Small nuclear ribonucleoprotein polypeptides B and B1                                       | SNRPB    | 716578    |
| Small nuclear ribonucleoprotein, U4/U6.U5 27kda subunit                                     | SNRNP27  | 708670    |
| Small nuclear RNA activating complex polypeptide 2                                          | SNAPC2   | 706176    |
| Small ubiquitin-like modifier 1                                                             | SUMO1    | 703644    |
| Small ubiquitin-like modifier 2                                                             | SUMO2    | 705512    |
| SMG9 nonsense mediated mrna decay factor                                                    | SMG9     | 710940    |
| Smoothelin                                                                                  | SMTN     | 716424    |
| SMYD family member 5                                                                        | SMYD5    | 705926    |
| SNF related kinase                                                                          | SNRK     | 715803    |
| SNRPN upstream reading frame                                                                | SNURF    | 711028    |
| Sodium channel, non voltage gated 1 beta subunit                                            | SCNN1B   | 700093    |
| Sodium channel, voltage gated, type I beta subunit                                          | SCN1B    | 707134    |
| Sodium channel, voltage gated, type X alpha subunit                                         | SCN10A   | 694962    |
| Solute carrier family 15 (oligopeptide transporter), member 3                               | SLC15A3  | 696060    |
| Solute carrier family 16 member 11                                                          | SLC16A11 | 721775    |
| Solute carrier family 2 (facilitated glucose transporter), member 2                         | SLC2A2   | 695538    |
| Solute carrier family 20 (phosphate transporter), member 2                                  | SLC20A2  | 705242    |
| Solute carrier family 22 (organic anion/urate transporter), member 12                       | SLC22A12 | 717530    |
| Solute carrier family 22 member 14                                                          | SLC22A14 | 696120    |
| Solute carrier family 22 member 15                                                          | SLC22A15 | 710102    |
| Solute carrier family 23 (ascorbic acid transporter), member 2                              | SLC23A2  | 717939    |
| Solute carrier family 25 (aspartate/glutamate carrier), member 12                           | SLC25A12 | 695173    |
| Solute carrier family 25 (mitochondrial carrier; adenine nucleotide translocator), member 6 | SLC25A6  | 719811    |
| Solute carrier family 25 (mitochondrial carrier; citrate transporter), member 1             | SLC25A1  | 719075    |
| Solute carrier family 25 (mitochondrial carrier; ornithine transporter) member 2            | SLC25A2  | 701587    |
| Solute carrier family 25 (mitochondrial carrier; oxoglutarate carrier), member 11           | SLC25A11 | 710569    |

|                                                                                  |          |           |
|----------------------------------------------------------------------------------|----------|-----------|
| Solute carrier family 25 (mitochondrial iron transporter), member 28             | SLC25A28 | 710002    |
| Solute carrier family 25 (mitochondrial iron transporter), member 37             | SLC25A37 | 710518    |
| Solute carrier family 25 (mitochondrial oxoadipate carrier), member 21           | SLC25A21 | 697370    |
| Solute carrier family 25 (S-adenosylmethionine carrier), member 26               | SLC25A26 | 697960    |
| Solute carrier family 26 (anion exchanger), member 8                             | SLC26A8  | 719049    |
| Solute carrier family 27 (fatty acid transporter), member 2                      | SLC27A2  | 715237    |
| Solute carrier family 28 (concentrative nucleoside transporter), member 2        | SLC28A2  | 713240    |
| Solute carrier family 30 (zinc transporter), member 8                            | SLC30A8  | 701127    |
| Solute carrier family 34 (type II sodium/phosphate cotransporter), member 2      | SLC34A2  | 694217    |
| Solute carrier family 35 (UDP-galactose transporter), member A2                  | SLC35A2  | 711587    |
| Solute carrier family 35 (UDP-glca/UDP-galnac transporter), member D1            | SLC35D1  | 700175    |
| Solute carrier family 35 member A5                                               | SLC35A5  | 708401    |
| Solute carrier family 37 (glucose-6-phosphate transporter), member 2             | SLC37A2  | 712841    |
| Solute carrier family 38 member 9                                                | SLC38A9  | 706752    |
| Solute carrier family 39 (zinc transporter), member 3                            | SLC39A3  | 711564    |
| Solute carrier family 39 (zinc transporter), member 7                            | SLC39A7  | 100430704 |
| Solute carrier family 4 (anion exchanger), member 1 (Diego blood group)          | SLC4A1   | 100427616 |
| Solute carrier family 4 (anion exchanger), member 2                              | SLC4A2   | 713966    |
| Solute carrier family 4, sodium borate transporter, member 11                    | SLC4A11  | 718393    |
| Solute carrier family 44 member 4                                                | SLC44A4  | 715779    |
| Solute carrier family 5 (sodium/glucose cotransporter), member 1                 | SLC5A1   | 717070    |
| Solute carrier family 5 (sodium/multivitamin and iodide cotransporter), member 6 | SLC5A6   | 699074    |
| Solute carrier family 6 (neurotransmitter transporter), member 13                | SLC6A13  | 705918    |
| Solute carrier family 6 (neurotransmitter transporter), member 2                 | SLC6A2   | 613238    |
| Solute carrier family 6 (neurotransmitter transporter), member 7                 | SLC6A7   | 711915    |
| Solute carrier family 6 (neurotransmitter transporter), member 8                 | SLC6A8   | 698307    |
| Solute carrier family 6 (neutral amino acid transporter), member 18              | SLC6A18  | 723065    |
| Solute carrier family 7 (anionic amino acid transporter), member 13              | SLC7A13  | 693964    |
| Solute carrier family 9, subfamily A (NHE3, cation proton                        | SLC9A3R2 | 694658    |

|                                                                                   |         |        |
|-----------------------------------------------------------------------------------|---------|--------|
| antiporter 3), member 3 regulator 2                                               |         |        |
| Solute carrier family 9, subfamily A (NHE4, cation proton antiporter 4), member 4 | SLC9A4  | 712136 |
| Solute carrier family 9, subfamily A (NHE9, cation proton antiporter 9), member 9 | SLC9A9  | 713935 |
| Solute carrier organic anion transporter family member 1C1                        | SLCO1C1 | 704740 |
| Solute carrier organic anion transporter family member 2B1                        | SLCO2B1 | 694829 |
| Sonic hedgehog                                                                    | SHH     | 716553 |
| Sorbin and SH3 domain containing 3                                                | SORBS3  | 716198 |
| Sorting nexin 11                                                                  | SNX11   | 696913 |
| Sorting nexin 12                                                                  | SNX12   | 696408 |
| Sorting nexin 13                                                                  | SNX13   | 714019 |
| Sorting nexin 22                                                                  | SNX22   | 706850 |
| Sorting nexin 32                                                                  | SNX32   | 721888 |
| Sorting nexin 33                                                                  | SNX33   | 706309 |
| Sorting nexin 4                                                                   | SNX4    | 716049 |
| Sp2 transcription factor                                                          | SP2     | 694834 |
| Sp4 transcription factor                                                          | SP4     | 712174 |
| SPARC like 1                                                                      | SPARCL1 | 701468 |
| SPARC related modular calcium binding 1                                           | SMOC1   | 712994 |
| Spectrin repeat containing, nuclear envelope family member 4                      | SYNE4   | 711904 |
| Spectrin, beta, non-erythrocytic 1                                                | SPTBN1  | 716794 |
| Sperm flagellar 1                                                                 | SPEF1   | 717547 |
| Spermatogenesis associated 17                                                     | SPATA17 | 707859 |
| Spermatogenesis associated 19                                                     | SPATA19 | 693524 |
| Spermatogenesis associated 20                                                     | SPATA20 | 703313 |
| Spermatogenesis associated 25                                                     | SPATA25 | 709097 |
| Spermatogenesis associated 2-like                                                 | SPATA2L | 699974 |
| Spermatogenesis associated 4                                                      | SPATA4  | 641336 |
| Spermatogenesis associated 6                                                      | SPATA6  | 710827 |
| Spermatogenesis associated 9                                                      | SPATA9  | 698748 |
| Spermidine synthase                                                               | SRM     | 714028 |
| Spermidine/spermine N1-acetyltransferase family member 2                          | SAT2    | 716044 |
| S-phase kinase-associated protein 2, E3 ubiquitin protein ligase                  | SKP2    | 700617 |
| Sphingomyelin phosphodiesterase 1                                                 | SMPD1   | 711248 |
| Sphingomyelin phosphodiesterase acid-like 3A                                      | SMPDL3A | 713696 |
| Sphingosine-1-phosphate receptor 4                                                | S1PR4   | 712637 |
| Spindle and kinetochore associated complex subunit 2                              | SKA2    | 711092 |
| Spinster homolog 1 (Drosophila)                                                   | SPNS1   | 704769 |
| Spla/ryanodine receptor domain and SOCS box containing 3                          | SPSB3   | 722489 |
| Splicing factor 3a subunit 2                                                      | SF3A2   | 721469 |
| Splicing factor, suppressor of white-apricot family                               | SFSWAP  | 709551 |
| SPRY domain containing 4                                                          | SPRYD4  | 713037 |
| SPT16 homolog, facilitates chromatin remodeling subunit                           | SUPT16H | 708066 |

|                                                                                                   |          |           |
|---------------------------------------------------------------------------------------------------|----------|-----------|
| Src-related kinase lacking C-terminal regulatory tyrosine and N-terminal myristylation sites      | SRMS     | 719587    |
| SRSF protein kinase 3                                                                             | SRPK3    | 100429808 |
| ST3 beta-galactoside alpha-2,3-sialyltransferase 4                                                | ST3GAL4  | 717792    |
| Stannin                                                                                           | SNN      | 711909    |
| Star related lipid transfer domain containing 13                                                  | STARD13  | 714104    |
| Star related lipid transfer domain containing 3                                                   | STARD3   | 697212    |
| Star related lipid transfer domain containing 5                                                   | STARD5   | 713308    |
| Stathmin 4                                                                                        | STMN4    | 712651    |
| Sterile alpha motif domain containing 4A                                                          | SAMD4A   | 695336    |
| Sterile alpha motif domain containing 9                                                           | SAMD9    | 702224    |
| Steroid receptor RNA activator 1                                                                  | SRA1     | 698169    |
| Stomatin like 2                                                                                   | STOML2   | 698458    |
| Storkhead box 2                                                                                   | STOX2    | 693692    |
| Stress induced phosphoprotein 1                                                                   | STIP1    | 717926    |
| Striatin                                                                                          | STRN     | 708491    |
| Stromal antigen 3                                                                                 | STAG3    | 711345    |
| Sulfiredoxin 1                                                                                    | SRXN1    | 714997    |
| Sulfite oxidase                                                                                   | SUOX     | 711164    |
| SUMO1/sentrin specific peptidase 5                                                                | SEN5     | 710223    |
| Suppression of tumorigenicity 13 (colon carcinoma) (Hsp70 interacting protein)                    | ST13     | 705664    |
| Suppressor of variegation 3-9 homolog 1                                                           | SUV39H1  | 711040    |
| SURP and G-patch domain containing 1                                                              | SUGP1    | 719772    |
| Sushi domain containing 1                                                                         | SUSD1    | 707656    |
| Sushi domain containing 6                                                                         | SUSD6    | 712719    |
| SWAP switching B-cell complex 70kda subunit                                                       | SWAP70   | 703651    |
| SWI/SNF related, matrix associated, actin dependent regulator of chromatin, subfamily d, member 3 | SMARCD3  | 715080    |
| SWIM-type zinc finger 7 associated protein 1                                                      | SWSAP1   | 716529    |
| Symplekin                                                                                         | SYMPK    | 722436    |
| Synapsin III                                                                                      | SYN3     | 100430216 |
| Synaptotagmin 6                                                                                   | SYT6     | 708175    |
| Synaptotagmin like 3                                                                              | SYTL3    | 699497    |
| Synaptotagmin like 4                                                                              | SYTL4    | 700889    |
| Synergin, gamma                                                                                   | SYNRG    | 717750    |
| Synovial sarcoma translocation gene on chromosome 18-like 2                                       | SS18L2   | 716387    |
| Syntaxin 1B                                                                                       | STX1B    | 714251    |
| Syntaxin 5                                                                                        | STX5     | 718435    |
| Syntrophin, alpha 1                                                                               | SNTA1    | 709824    |
| Syntrophin, gamma 1                                                                               | SNTG1    | 709244    |
| Synuclein alpha interacting protein                                                               | SNCAIP   | 700372    |
| Tankyrase 1 binding protein 1                                                                     | TNKS1BP1 | 704825    |
| TAO kinase 2                                                                                      | TAOK2    | 707777    |
| Target of EGR1, member 1 (nuclear)                                                                | TOE1     | 705770    |
| TATA-box binding protein associated factor 1                                                      | TAF1     | 698800    |
| TATA-box binding protein associated factor 10                                                     | TAF10    | 710022    |

|                                                             |          |        |
|-------------------------------------------------------------|----------|--------|
| TATA-box binding protein associated factor 2                | TAF2     | 702411 |
| TATA-box binding protein associated factor 5                | TAF5     | 714558 |
| TATA-box binding protein associated factor 6 like           | TAF6L    | 722233 |
| Tax1 (human T-cell leukemia virus type I) binding protein 3 | TAX1BP3  | 706829 |
| TBK1 binding protein 1                                      | TBKBP1   | 693913 |
| T-box 21                                                    | TBX21    | 694044 |
| TCF3 (E2A) fusion partner (in childhood Leukemia)           | TFPT     | 720296 |
| Tctex1 domain containing 2                                  | TCTEX1D2 | 711098 |
| Teashirt zinc finger homeobox 1                             | TSHZ1    | 703018 |
| Tektin 1                                                    | TEKT1    | 713555 |
| TELO2 interacting protein 2                                 | TTI2     | 696776 |
| Telomeric repeat binding factor 2, interacting protein      | TERF2IP  | 712149 |
| Tenascin XB                                                 | TNXB     | 716998 |
| Teneurin transmembrane protein 1                            | TENM1    | 699897 |
| Tensin 2                                                    | TNS2     | 700813 |
| TERF1 (TRF1)-interacting nuclear factor 2                   | TINF2    | 715812 |
| Testis expressed 26                                         | TEX26    | 713363 |
| Testis expressed 30                                         | TEX30    | 701917 |
| Testis-specific serine kinase 2                             | TSSK2    | 711241 |
| Tetraspanin 18                                              | TSPAN18  | 715506 |
| Tetraspanin 32                                              | TSPAN32  | 704862 |
| Tetraspanin 5                                               | TSPAN5   | 706537 |
| Tetraspanin 7                                               | TSPAN7   | 698011 |
| Tetratricopeptide repeat domain 1                           | TTC1     | 695225 |
| Tetratricopeptide repeat domain 14                          | TTC14    | 710895 |
| Tetratricopeptide repeat domain 21A                         | TTC21A   | 694904 |
| Tetratricopeptide repeat domain 23                          | TTC23    | 708530 |
| Tetratricopeptide repeat domain 31                          | TTC31    | 708810 |
| Tetratricopeptide repeat domain 7B                          | TTC7B    | 696029 |
| Tetratricopeptide repeat domain 9C                          | TTC9C    | 718583 |
| TGF-beta activated kinase 1/MAP3K7 binding protein 1        | TAB1     | 703409 |
| THAP domain containing 7                                    | THAP7    | 696208 |
| Thiamine triphosphatase                                     | THTPA    | 714403 |
| Thioredoxin domain containing 9                             | TXNDC9   | 709303 |
| Thioredoxin reductase 2                                     | TXNRD2   | 712475 |
| Thioredoxin-related transmembrane protein 1                 | TMX1     | 707057 |
| Thioredoxin-related transmembrane protein 4                 | TMX4     | 718375 |
| THO complex 3                                               | THOC3    | 695561 |
| THO complex 6                                               | THOC6    | 700217 |
| Thy-1 cell surface antigen                                  | THY1     | 705321 |
| Thymidine phosphorylase                                     | TYMP     | 716161 |
| Thymosin beta 4, X-linked                                   | TMSB4X   | 710959 |
| Thyroid hormone receptor associated protein 3               | THRAP3   | 713033 |
| TIA1 cytotoxic granule-associated RNA binding protein       | TIA1     | 702366 |
| Tigger transposable element derived 4                       | TIGD4    | 695777 |
| TIMP metalloproteinase inhibitor 1                          | TIMP1    | 574348 |
| Tissue specific transplantation antigen P35B                | TSTA3    | 698005 |
| Titin-cap                                                   | TCAP     | 697327 |

|                                                                    |           |           |
|--------------------------------------------------------------------|-----------|-----------|
| TMEM9 domain family member B                                       | TMEM9B    | 708447    |
| TNF alpha induced protein 8 like 2                                 | TNFAIP8L2 | 709632    |
| TNF receptor associated factor 3                                   | TRAF3     | 693961    |
| TNF receptor associated factor 6                                   | TRAF6     | 716907    |
| Tocopherol (alpha) transfer protein-like                           | TTPAL     | 712620    |
| Toll-like receptor 9                                               | TLR9      | 574395    |
| Topoisomerase (DNA) I                                              | TOP1      | 697300    |
| Topoisomerase (DNA) III beta                                       | TOP3B     | 698317    |
| Trace amine associated receptor 6                                  | TAAR6     | 709418    |
| TRAF2 and NCK interacting kinase                                   | TNIK      | 695414    |
| TRAF3 interacting protein 3                                        | TRAF3IP3  | 712895    |
| Trafficking protein particle complex 1                             | TRAPPC1   | 716622    |
| Trafficking protein particle complex 3                             | TRAPPC3   | 713705    |
| Transaldolase 1                                                    | TALDO1    | 720828    |
| Transcobalamin 1                                                   | TCN1      | 698583    |
| Transcription elongation factor A (SII), 2                         | TCEA2     | 694026    |
| Transcription elongation factor A (SII)-like 1                     | TCEAL1    | 696826    |
| Transcription factor 15 (basic helix-loop-helix)                   | TCF15     | 716916    |
| Transcription factor 7-like 1 (T-cell specific, HMG-box)           | TCF7L1    | 694560    |
| Transcription factor Dp family member 3                            | TFDP3     | 706557    |
| Transcription factor EC                                            | TFEC      | 704124    |
| Transcriptional adaptor 3                                          | TADA3     | 700090    |
| Transducin (beta)-like 1 X-linked receptor 1                       | TBL1XR1   | 712740    |
| Transducin (beta)-like 3                                           | TBL3      | 693864    |
| Transducin like enhancer of split 3                                | TLE3      | 698046    |
| Transforming growth factor beta 1 induced transcript 1             | TGFB1I1   | 714172    |
| Transforming, acidic coiled-coil containing protein 3              | TACC3     | 712898    |
| Transgelin 2                                                       | TAGLN2    | 719527    |
| Transient receptor potential cation channel, subfamily C, member 5 | TRPC5     | 707171    |
| Transient receptor potential cation channel, subfamily C, member 7 | TRPC7     | 712863    |
| Transketolase-like 1                                               | TKTL1     | 699278    |
| Translocase of inner mitochondrial membrane 17 homolog B (yeast)   | TIMM17B   | 714895    |
| Translocase of inner mitochondrial membrane domain containing 1    | TIMMDC1   | 712414    |
| Translocase of outer mitochondrial membrane 22 homolog (yeast)     | TOMM22    | 701286    |
| Translocase of outer mitochondrial membrane 40 homolog (yeast)     | TOMM40    | 713297    |
| Translocase of outer mitochondrial membrane 6 homolog (yeast)      | TOMM6     | 100423264 |
| Transmembrane 4 L six family member 5                              | TM4SF5    | 709844    |
| Transmembrane 9 superfamily protein member 4                       | TM9SF4    | 712260    |
| Transmembrane channel like 8                                       | TMC8      | 100423640 |
| Transmembrane p24 trafficking protein 9                            | TMED9     | 701114    |
| Transmembrane phosphoinositide 3-phosphatase and                   | TPTE2     | 704870    |



|                                                                        |          |           |
|------------------------------------------------------------------------|----------|-----------|
| tensin homolog 2                                                       |          |           |
| Transmembrane protease, serine 13                                      | TMPRSS13 | 698586    |
| Transmembrane protease, serine 2                                       | TMPRSS2  | 715138    |
| Transmembrane protein 104                                              | TMEM104  | 698592    |
| Transmembrane protein 11                                               | TMEM11   | 704970    |
| Transmembrane protein 115                                              | TMEM115  | 702164    |
| Transmembrane protein 121                                              | TMEM121  | 700005    |
| Transmembrane protein 123                                              | TMEM123  | 702833    |
| Transmembrane protein 135                                              | TMEM135  | 704963    |
| Transmembrane protein 138                                              | TMEM138  | 693905    |
| Transmembrane protein 145                                              | TMEM145  | 709268    |
| Transmembrane protein 150A                                             | TMEM150A | 696101    |
| Transmembrane protein 160                                              | TMEM160  | 716996    |
| Transmembrane protein 163                                              | TMEM163  | 709015    |
| Transmembrane protein 173                                              | TMEM173  | 694353    |
| Transmembrane protein 177                                              | TMEM177  | 695399    |
| Transmembrane protein 179B                                             | TMEM179B | 718518    |
| Transmembrane protein 183A                                             | TMEM183A | 704195    |
| Transmembrane protein 187                                              | TMEM187  | 698397    |
| Transmembrane protein 205                                              | TMEM205  | 714330    |
| Transmembrane protein 237                                              | TMEM237  | 702262    |
| Transmembrane protein 246                                              | TMEM246  | 713682    |
| Transmembrane protein 248                                              | TMEM248  | 695654    |
| Transmembrane protein 256                                              | TMEM256  | 715274    |
| Transmembrane protein 5                                                | TMEM5    | 717102    |
| Transmembrane protein 55A                                              | TMEM55A  | 696779    |
| Transmembrane protein 55B                                              | TMEM55B  | 100428000 |
| Transmembrane protein 59 like                                          | TMEM59L  | 719572    |
| Transmembrane protein 60                                               | TMEM60   | 693679    |
| Transmembrane protein with EGF-like and two follistatin-like domains 2 | TMEFF2   | 694555    |
| Tribbles pseudokinase 3                                                | TRIB3    | 714636    |
| Triggering receptor expressed on myeloid cells 2                       | TREM2    | 719740    |
| Trinucleotide repeat containing 6A                                     | TNRC6A   | 701680    |
| Tripartite motif containing 21                                         | TRIM21   | 717826    |
| Tripartite motif containing 22                                         | TRIM22   | 713814    |
| Tripartite motif containing 33                                         | TRIM33   | 710600    |
| Tripartite motif containing 47                                         | TRIM47   | 704642    |
| Tripartite motif containing 62                                         | TRIM62   | 709927    |
| Tripartite motif family like 1                                         | TRIML1   | 698114    |
| TRK-fused gene                                                         | TFG      | 700972    |
| Trna methyltransferase 11-2 homolog (S. Cerevisiae)                    | TRMT112  | 717676    |
| Trna splicing endonuclease subunit 54                                  | TSEN54   | 702604    |
| Trophoblast glycoprotein                                               | TPBG     | 693944    |
| Tropomyosin 2 (beta)                                                   | TPM2     | 696604    |
| Tropomyosin 3                                                          | TPM3     | 716336    |
| Troponin C type 2 (fast)                                               | TNNC2    | 717270    |
| Troponin T type 2 (cardiac)                                            | TNNT2    | 709882    |

|                                                           |           |           |
|-----------------------------------------------------------|-----------|-----------|
| Troponin T type 3 (skeletal, fast)                        | TNNT3     | 704095    |
| Trub pseudouridine (psi) synthase family member 2         | TRUB2     | 717619    |
| Tryptase gamma 1                                          | TPSG1     | 100425752 |
| TSR2, 20S rRNA accumulation, homolog (S. Cerevisiae)      | TSR2      | 701234    |
| TSSK6 activating co-chaperone                             | TSACC     | 719490    |
| Tuberous sclerosis 2                                      | TSC2      | 694965    |
| Tubulin alpha 3c                                          | TUBA3C    | 707215    |
| Tubulin alpha 4a                                          | TUBA4A    | 702583    |
| Tubulin beta class I                                      | TUBB      | 574113    |
| Tubulin folding cofactor C                                | TBCC      | 696997    |
| Tubulin polymerization-promoting protein family member 3  | TPPP3     | 100429880 |
| Tubulin tyrosine ligase like 4                            | TTLL4     | 700064    |
| Tumor necrosis factor receptor superfamily member 13C     | TNFRSF13C | 712577    |
| Tumor necrosis factor receptor superfamily member 25      | TNFRSF25  | 703744    |
| Tumor protein p53 inducible nuclear protein 2             | TP53INP2  | 707113    |
| Tumor protein p53 inducible protein 3                     | TP53I3    | 704206    |
| Tumor protein p63                                         | TP63      | 703997    |
| Tumor protein, translationally-controlled 1               | TPT1      | 702155    |
| Tumor suppressing subtransferable candidate 1             | TSSC1     | 707650    |
| Twist family bHLH transcription factor 2                  | TWIST2    | 697078    |
| TYRO protein tyrosine kinase binding protein              | TYROBP    | 574207    |
| Tyrosinase-related protein 1                              | TYRP1     | 714646    |
| Tyrosine hydroxylase                                      | TH        | 721137    |
| Tyrosine kinase, non-receptor, 1                          | TNK1      | 715180    |
| UBA domain containing 2                                   | UBAC2     | 703484    |
| Ubiquitin A-52 residue ribosomal protein fusion product 1 | UBA52     | 720243    |
| Ubiquitin B                                               | UBB       | 696110    |
| Ubiquitin conjugating enzyme E2 variant 1                 | UBE2V1    | 100425552 |
| Ubiquitin conjugating enzyme E2G 2                        | UBE2G2    | 710862    |
| Ubiquitin conjugating enzyme E2O                          | UBE2O     | 710529    |
| Ubiquitin C-terminal hydrolase L1                         | UCHL1     | 701579    |
| Ubiquitin domain containing 2                             | UBTD2     | 709455    |
| Ubiquitin like 4B                                         | UBL4B     | 701055    |
| Ubiquitin like 5                                          | UBL5      | 711015    |
| Ubiquitin like 7                                          | UBL7      | 702305    |
| Ubiquitin protein ligase E3D                              | UBE3D     | 694910    |
| Ubiquitin related modifier 1                              | URM1      | 722618    |
| Ubiquitin specific peptidase 10                           | USP10     | 718471    |
| Ubiquitin specific peptidase 11                           | USP11     | 706555    |
| Ubiquitin specific peptidase 20                           | USP20     | 716505    |
| Ubiquitin specific peptidase 21                           | USP21     | 719894    |
| Ubiquitin specific peptidase 26                           | USP26     | 706435    |
| Ubiquitin specific peptidase 47                           | USP47     | 701660    |
| Ubiquitin specific peptidase 48                           | USP48     | 707110    |
| Ubiquitin specific peptidase 5 (isopeptidase T)           | USP5      | 714032    |
| Ubiquitin specific peptidase 7 (herpes virus-associated)  | USP7      | 714625    |
| Ubiquitin specific peptidase 9, Y-linked                  | USP9Y     | 100270704 |
| Ubiquitination factor E4B                                 | UBE4B     | 713348    |

|                                                                   |           |           |
|-------------------------------------------------------------------|-----------|-----------|
| Ubiquitin-conjugating enzyme E2E 2                                | UBE2E2    | 699101    |
| Ubiquitin-like modifier activating enzyme 7                       | UBA7      | 704875    |
| UBX domain protein 1                                              | UBXN1     | 718643    |
| UBX domain protein 10                                             | UBXN10    | 705058    |
| UBX domain protein 11                                             | UBXN11    | 719826    |
| UDP-Gal:betaglcnac beta 1,4- galactosyltransferase, polypeptide 3 | B4GALT3   | 719920    |
| UHRF1 binding protein 1-like                                      | UHRF1BP1L | 694816    |
| Unc-119 lipid binding chaperone B                                 | UNC119B   | 698066    |
| Unc-79 homolog (C. Elegans)                                       | UNC79     | 699262    |
| Upstream transcription factor family member 3                     | USF3      | 709660    |
| Uridine monophosphate synthetase                                  | UMPS      | 715664    |
| Uridine-cytidine kinase 1                                         | UCK1      | 715417    |
| Urocortin                                                         | UCN       | 699942    |
| Uroporphyrinogen III synthase                                     | UROS      | 696043    |
| Usher syndrome 1C                                                 | USH1C     | 696911    |
| USP6 N-terminal like                                              | USP6NL    | 694275    |
| Vac14 homolog (S. Cerevisiae)                                     | VAC14     | 708741    |
| Vacuolar protein sorting 28 homolog (S. Cerevisiae)               | VPS28     | 702412    |
| Vacuolar protein sorting 4 homolog A (S. Cerevisiae)              | VPS4A     | 705277    |
| V-akt murine thymoma viral oncogene homolog 1                     | AKT1      | 697747    |
| V-akt murine thymoma viral oncogene homolog 3                     | AKT3      | 714717    |
| Valyl-trna synthetase                                             | VARS      | 715537    |
| VANGL planar cell polarity protein 1                              | VANGL1    | 709730    |
| Vascular endothelial growth factor A                              | VEGFA     | 574209    |
| Vasoactive intestinal peptide receptor 1                          | VIPR1     | 717438    |
| V-crk avian sarcoma virus CT10 oncogene homolog                   | CRK       | 701185    |
| Ventral anterior homeobox 2                                       | VAX2      | 703531    |
| Versican                                                          | VCAN      | 712365    |
| Vesicle (multivesicular body) trafficking 1                       | VT A1     | 701578    |
| Vesicle associated membrane protein 1                             | VAMP1     | 722049    |
| Vesicle associated membrane protein 5                             | VAMP5     | 695471    |
| Villin 1                                                          | VIL1      | 698946    |
| Villin-like                                                       | VILL      | 696988    |
| Visual system homeobox 1                                          | VSX1      | 715973    |
| Vitamin K epoxide reductase complex subunit 1                     | VKORC1    | 714412    |
| Vitrin                                                            | VIT       | 708384    |
| Vitronectin                                                       | VTN       | 708499    |
| Von Willebrand factor                                             | VWF       | 722019    |
| Von Willebrand factor C and EGF domains                           | VWCE      | 694385    |
| VPS16, CORVET/HOPS core subunit                                   | VPS16     | 100426688 |
| VPS26 retromer complex component B                                | VPS26B    | 694566    |
| VPS39 HOPS complex subunit                                        | VPS39     | 707791    |
| VPS52 GARP complex subunit                                        | VPS52     | 100430904 |
| VPS54 GARP complex subunit                                        | VPS54     | 695397    |
| V-set and immunoglobulin domain containing 4                      | VSIG4     | 709685    |
| WAP four-disulfide core domain 12                                 | WFDC12    | 711552    |
| WAP four-disulfide core domain 3                                  | WFDC3     | 709542    |

|                                                                        |         |           |
|------------------------------------------------------------------------|---------|-----------|
| WD repeat domain 45                                                    | WDR45   | 715262    |
| WD repeat domain 74                                                    | WDR74   | 718460    |
| WD repeat domain 83 opposite strand                                    | WDR83OS | 716302    |
| Williams-Beuren syndrome chromosome region 17                          | WBSCR17 | 695207    |
| Wilms tumor 1 associated protein                                       | WTAP    | 702295    |
| Wingless-type MMTV integration site family member 7B                   | WNT7B   | 713864    |
| WNK lysine deficient protein kinase 1                                  | WNK1    | 706493    |
| Wolfram syndrome 1 (wolframin)                                         | WFS1    | 710948    |
| WSC domain containing 1                                                | WSCD1   | 712488    |
| WW domain binding protein 1                                            | WBP1    | 709202    |
| WW domain containing E3 ubiquitin protein ligase 2                     | WWP2    | 705464    |
| X-ray repair complementing defective repair in Chinese hamster cells 6 | XRCC6   | 707975    |
| Xylosyltransferase II                                                  | XYLT2   | 705139    |
| YEATS domain containing 4                                              | YEATS4  | 718376    |
| Yip1 domain family member 2                                            | YIPF2   | 713753    |
| Yip1 domain family member 4                                            | YIPF4   | 706819    |
| Yippee like 3                                                          | YPEL3   | 708740    |
| YTH N(6)-methyladenosine RNA binding protein 2                         | YTHDF2  | 717225    |
| ZFP69 zinc finger protein                                              | ZFP69   | 694407    |
| ZFP69 zinc finger protein B                                            | ZFP69B  | 694281    |
| Zinc binding alcohol dehydrogenase domain containing 2                 | ZADH2   | 701079    |
| Zinc finger and BTB domain containing 2                                | ZBTB2   | 704782    |
| Zinc finger and BTB domain containing 39                               | ZBTB39  | 713914    |
| Zinc finger and BTB domain containing 47                               | ZBTB47  | 100428360 |
| Zinc finger and BTB domain containing 8 opposite strand                | ZBTB8OS | 708590    |
| Zinc finger and SCAN domain containing 2                               | ZSCAN2  | 695673    |
| Zinc finger CCCH-type containing 11A                                   | ZC3H11A | 701537    |
| Zinc finger CCCH-type containing 12A                                   | ZC3H12A | 713604    |
| Zinc finger CCCH-type containing 3                                     | ZC3H3   | 708584    |
| Zinc finger homeobox 3                                                 | ZFH3    | 706074    |
| Zinc finger protein 101                                                | ZNF101  | 720388    |
| Zinc finger protein 112                                                | ZNF112  | 713527    |
| Zinc finger protein 142                                                | ZNF142  | 702214    |
| Zinc finger protein 202                                                | ZNF202  | 708814    |
| Zinc finger protein 217                                                | ZNF217  | 699314    |
| Zinc finger protein 22                                                 | ZNF22   | 706208    |
| Zinc finger protein 230                                                | ZNF230  | 711566    |
| Zinc finger protein 304                                                | ZNF304  | 100428176 |
| Zinc finger protein 319                                                | ZNF319  | 706286    |
| Zinc finger protein 335                                                | ZNF335  | 708282    |
| Zinc finger protein 354B                                               | ZNF354B | 712885    |
| Zinc finger protein 385A                                               | ZNF385A | 705436    |
| Zinc finger protein 408                                                | ZNF408  | 714213    |
| Zinc finger protein 41                                                 | ZNF41   | 706770    |
| Zinc finger protein 436                                                | ZNF436  | 709638    |
| Zinc finger protein 467                                                | ZNF467  | 712106    |
| Zinc finger protein 484                                                | ZNF484  | 711976    |

|                                                  |         |           |
|--------------------------------------------------|---------|-----------|
| Zinc finger protein 496                          | ZNF496  | 709694    |
| Zinc finger protein 526                          | ZNF526  | 707135    |
| Zinc finger protein 543                          | ZNF543  | 100428080 |
| Zinc finger protein 574                          | ZNF574  | 706729    |
| Zinc finger protein 576                          | ZNF576  | 710398    |
| Zinc finger protein 584                          | ZNF584  | 711420    |
| Zinc finger protein 599                          | ZNF599  | 706512    |
| Zinc finger protein 692                          | ZNF692  | 710010    |
| Zinc finger protein 7                            | ZNF7    | 715735    |
| Zinc finger protein 70                           | ZNF70   | 698442    |
| Zinc finger protein 79                           | ZNF79   | 700961    |
| Zinc finger protein 821                          | ZNF821  | 707355    |
| Zinc finger protein interacting with K protein 1 | ZIK1    | 708621    |
| Zinc finger, AN1-type domain 2B                  | ZFAND2B | 702027    |
| Zinc finger, AN1-type domain 4                   | ZFAND4  | 708136    |
| Zinc finger, C2HC-type containing 1A             | ZC2HC1A | 698760    |
| Zinc finger, C4H2 domain containing              | ZC4H2   | 708764    |
| Zinc finger, CCCH-type with G-patch domain       | ZGPAT   | 719499    |
| Zinc finger, CCHC domain containing 10           | ZCCHC10 | 709423    |
| Zinc finger, CCHC domain containing 3            | ZCCHC3  | 714477    |
| Zinc finger, DHHC-type containing 12             | ZDHHC12 | 722606    |
| Zinc finger, DHHC-type containing 16             | ZDHHC16 | 705982    |
| Zinc finger, DHHC-type containing 17             | ZDHHC17 | 693595    |
| Zinc finger, DHHC-type containing 2              | ZDHHC2  | 710001    |
| Zinc finger, DHHC-type containing 5              | ZDHHC5  | 704863    |
| Zinc finger, HIT-type containing 1               | ZNHIT1  | 714339    |
| Zinc finger, matrin-type 5                       | ZMAT5   | 715058    |
| Zinc finger, MYM-type 4                          | ZMYM4   | 712793    |
| Zinc finger, MYND-type containing 11             | ZMYND11 | 708761    |
| Zinc ribbon domain containing 1                  | ZNRD1   | 712151    |
| Zona pellucida glycoprotein 2 (sperm receptor)   | ZP2     | 697458    |
| Zona pellucida glycoprotein 3 (sperm receptor)   | ZP3     | 719925    |
| Zyg-11 related, cell cycle regulator             | ZER1    | 717262    |
| Zyxin                                            | ZYX     | 706407    |

Table S4: List of expressed genes in the endometrium of Non-fecund cycle

**(1) Expressed in groups 2a, 2b and 2c**

| Gene Name                                                       | Gene Symbol | Entrez Gene ID |
|-----------------------------------------------------------------|-------------|----------------|
| 1-acylglycerol-3-phosphate O-acyltransferase 1                  | AGPAT1      | 717174         |
| 1-acylglycerol-3-phosphate O-acyltransferase 5                  | AGPAT5      | 716847         |
| 2,4-dienoyl-coa reductase 1, mitochondrial                      | DECR1       | 696035         |
| 2-phosphoxylose phosphatase 1                                   | PXYLP1      | 715229         |
| 3-hydroxyacyl-coa dehydratase 1                                 | HACD1       | 700635         |
| 3-oxoacyl-ACP synthase, mitochondrial                           | OXSM        | 703382         |
| 5'-3' exoribonuclease 2                                         | XRN2        | 700934         |
| 5'-nucleotidase, cytosolic IIIA                                 | NT5C3A      | 708743         |
| 5-phosphohydroxy-L-lysine phospho-lyase                         | PHYKPL      | 702302         |
| 8-oxoguanine DNA glycosylase                                    | OGG1        | 700481         |
| Abhydrolase domain containing 12                                | ABHD12      | 705915         |
| Abhydrolase domain containing 8                                 | ABHD8       | 718980         |
| ABI family member 3                                             | ABI3        | 698710         |
| Acetyl-coa acetyltransferase 1                                  | ACAT1       | 707653         |
| Acetyl-coa acyltransferase 2                                    | ACAA2       | 709350         |
| Acetyl-coa carboxylase alpha                                    | ACACA       | 714218         |
| Acidic nuclear phosphoprotein 32 family member B                | ANP32B      | 715508         |
| Acidic residue methyltransferase 1                              | ARMT1       | 704570         |
| Aconitase 1                                                     | ACO1        | 705075         |
| Aconitase 2                                                     | ACO2        | 707441         |
| Actin like 7B                                                   | ACTL7B      | 710750         |
| Actin related protein 2/3 complex subunit 1A                    | ARPC1A      | 718635         |
| Actin related protein 2/3 complex subunit 2                     | ARPC2       | 700536         |
| Actin related protein 2/3 complex subunit 3                     | ARPC3       | 709199         |
| Activating transcription factor 4                               | ATF4        | 703965         |
| Activin A receptor type I                                       | ACVR1       | 697935         |
| Acyl-coa binding domain containing 3                            | ACBD3       | 699311         |
| Acyl-coa binding domain containing 6                            | ACBD6       | 716418         |
| Acyl-coa dehydrogenase, C-4 to C-12 straight chain              | ACADM       | 705168         |
| Acyl-coa oxidase 1, palmitoyl                                   | ACOX1       | 705197         |
| Acyl-coa thioesterase 13                                        | ACOT13      | 100335136      |
| ADAM metallopeptidase domain 21                                 | ADAM21      | 715640         |
| ADAM metallopeptidase with thrombospondin type 1 motif 14       | ADAMTS14    | 710154         |
| ADAM metallopeptidase with thrombospondin type 1 motif 6        | ADAMTS6     | 696021         |
| Adaptor related protein complex 1 associated regulatory protein | AP1AR       | 700734         |
| Adaptor related protein complex 3, sigma 1 subunit              | AP3S1       | 696644         |
| Adaptor related protein complex 4, beta 1 subunit               | AP4B1       | 707634         |
| Adducin 1                                                       | ADD1        | 700805         |
| Adducin 3                                                       | ADD3        | 677712         |
| Adenosine monophosphate deaminase 2                             | AMPD2       | 699561         |

|                                                                         |          |           |
|-------------------------------------------------------------------------|----------|-----------|
| Adenylate cyclase 4                                                     | ADCY4    | 714684    |
| Adenylate kinase 3                                                      | AK3      | 694714    |
| Adenylosuccinate synthase                                               | ADSS     | 713580    |
| Adhesion G protein-coupled receptor A3                                  | ADGRA3   | 715618    |
| Adhesion G protein-coupled receptor L2                                  | ADGRL2   | 708998    |
| Adhesion molecule with Ig-like domain 1                                 | AMIGO1   | 698932    |
| Adipogenesis regulatory factor                                          | ADIRF    | 699173    |
| Adiponectin receptor 2                                                  | ADIPOR2  | 707547    |
| ADP ribosylation factor 4                                               | ARF4     | 703432    |
| ADP ribosylation factor guanine nucleotide exchange factor 1            | ARFGEF1  | 704359    |
| ADP ribosylation factor like gtpase 10                                  | ARL10    | 696524    |
| ADP ribosylation factor like gtpase 6                                   | ARL6     | 696616    |
| ADP ribosylation factor like gtpase 6 interacting protein 5             | ARL6IP5  | 696360    |
| ADP-ribosylhydrolase like 2                                             | ADPRHL2  | 712758    |
| Aftiphilin                                                              | AFTPH    | 696100    |
| AHA1, activator of heat shock 90kda protein ATPase homolog 1 (yeast)    | AHSA1    | 706547    |
| Ajuba LIM protein                                                       | AJUBA    | 712865    |
| A-kinase anchoring protein 2                                            | AKAP2    | 709841    |
| A-kinase anchoring protein 9                                            | AKAP9    | 702970    |
| Aladin WD repeat nucleoporin                                            | AAAS     | 719095    |
| Alanine--glyoxylate aminotransferase 2                                  | AGXT2    | 699250    |
| Aldehyde dehydrogenase 1 family member A1                               | ALDH1A1  | 702598    |
| Aldehyde dehydrogenase 18 family member A1                              | ALDH18A1 | 703357    |
| Aldo-keto reductase family 1, member B1 (aldose reductase)              | AKR1B1   | 705957    |
| ALG2, alpha-1,3/1,6-mannosyltransferase                                 | ALG2     | 714850    |
| ALG5, dolichyl-phosphate beta-glucosyltransferase                       | ALG5     | 694836    |
| Alkb homolog 4, lysine demethylase                                      | ALKBH4   | 715078    |
| Alkb homolog 5, RNA demethylase                                         | ALKBH5   | 700205    |
| All-trans retinoic acid induced differentiation factor                  | ATRAID   | 699201    |
| Alpha thalassemia/mental retardation syndrome X-linked                  | ATRX     | 705735    |
| Alpha-2-macroglobulin                                                   | A2M      | 716834    |
| Alpha-defensin 1A                                                       | MNP1A    | 574196    |
| Aminoacylase 3                                                          | ACY3     | 711083    |
| Aminoadipate-semialdehyde dehydrogenase-phosphopantetheinyl transferase | AASDHPPT | 100328984 |
| Aminoadipate-semialdehyde synthase                                      | AASS     | 694594    |
| Amino-terminal enhancer of split                                        | AES      | 712353    |
| Amphiphysin                                                             | AMPH     | 704559    |
| Amylase, alpha 2B (pancreatic)                                          | AMY2B    | 712893    |
| Amyloid beta (A4) precursor protein-binding, family B, member 3         | APBB3    | 698296    |
| Anaphase promoting complex subunit 15                                   | ANAPC15  | 718333    |
| Anaphase promoting complex subunit 2                                    | ANAPC2   | 706384    |
| Anaphase promoting complex subunit 4                                    | ANAPC4   | 694006    |
| Ancient ubiquitous protein 1                                            | AUP1     | 710020    |
| Androgen-induced 1                                                      | AIG1     | 700988    |
| Angio associated migratory cell protein                                 | AAMP     | 700763    |
| Ankyrin 2, neuronal                                                     | ANK2     | 702180    |

|                                                                     |          |         |
|---------------------------------------------------------------------|----------|---------|
| Ankyrin 3, node of Ranvier (ankyrin G)                              | ANK3     | 699518  |
| Ankyrin repeat and IBR domain containing 1                          | ANKIB1   | 703273  |
| Ankyrin repeat and MYND domain containing 2                         | ANKMY2   | 709414  |
| Ankyrin repeat domain 2 (stretch responsive muscle)                 | ANKRD2   | 707097  |
| Ankyrin repeat domain 27                                            | ANKRD27  | 716232  |
| Ankyrin repeat domain 35                                            | ANKRD35  | 706961  |
| Ankyrin repeat domain 46                                            | ANKRD46  | 705491  |
| Ankyrin repeat domain 6                                             | ANKRD6   | 701339  |
| Annexin A1                                                          | ANXA1    | 702946  |
| Annexin A11                                                         | ANXA11   | 707628  |
| Annexin A2                                                          | ANXA2    | 706240  |
| Annexin A3                                                          | ANXA3    | 697239  |
| Annexin A7                                                          | ANXA7    | 707166  |
| Anoctamin 10                                                        | ANO10    | 715666  |
| Anoctamin 4                                                         | ANO4     | 695973  |
| Anterior gradient 2, protein disulphide isomerase family member     | AGR2     | 709127  |
| Anterior gradient 3, protein disulphide isomerase family member     | AGR3     | 714517  |
| APEX nuclease (apurinic/aprimidinic endonuclease) 2                 | APEX2    | 702084  |
| APEX nuclease (multifunctional DNA repair enzyme) 1                 | APEX1    | 702757  |
| Apolipoprotein B mRNA editing enzyme, catalytic polypeptide-like 3H | APOBEC3H | 723811  |
| Apolipoprotein O                                                    | APOO     | 698137  |
| Apoptosis inducing factor, mitochondria associated 1                | AIFM1    | 702773  |
| Apoptosis inhibitor 5                                               | API5     | 716346  |
| Arfgap with gtpase domain, ankyrin repeat and PH domain 1           | AGAP1    | 693652  |
| Arginine and glutamate rich 1                                       | ARGLU1   | 702840  |
| Arginine/serine-rich protein 1                                      | RSRP1    | 712757  |
| Arginine-glutamic acid dipeptide (RE) repeats                       | RERE     | 708902  |
| Arginyltransferase 1                                                | ATE1     | 705248  |
| Arginyl-trna synthetase                                             | RARS     | 698998  |
| Arginyl-trna synthetase 2, mitochondrial                            | RARS2    | 699240  |
| Armadillo repeat containing 9                                       | ARMC9    | 711891  |
| Armadillo repeat gene deleted in velocardiofacial syndrome          | ARVCF    | 712399  |
| ARP2 actin-related protein 2 homolog (yeast)                        | ACTR2    | 697080  |
| ARP5 actin-related protein 5 homolog (yeast)                        | ACTR5    | 698191  |
| Arrestin, beta 2                                                    | ARRB2    | 709399  |
| Artemin                                                             | ARTN     | 701641  |
| ARV1 homolog, fatty acid homeostasis modulator                      | ARV1     | 713975  |
| Aryl hydrocarbon receptor nuclear translocator like                 | ARNTL    | 700464  |
| Aspartate beta-hydroxylase domain containing 1                      | ASPHD1   | 707467  |
| Aspartate dehydrogenase domain containing                           | ASPDH    | 719609  |
| Aspartoacylase                                                      | ASPA     | 706170  |
| Aspartyl aminopeptidase                                             | DNPEP    | 703180  |
| Asteroid homolog 1 (Drosophila)                                     | ASTE1    | 719271  |
| Ataxin 2-like                                                       | ATXN2L   | 708359  |
| ATP binding cassette subfamily A member 1                           | ABCA1    | 716146  |
| ATP binding cassette subfamily D member 1                           | ABCD1    | 696794  |
| ATP binding cassette subfamily E member 1                           | ABCE1    | 701945  |
| ATP synthase F0 subunit 6                                           | ATP6     | 2846629 |



|                                                                                                      |          |           |
|------------------------------------------------------------------------------------------------------|----------|-----------|
| ATP synthase, H <sup>+</sup> transporting, mitochondrial F1 complex, alpha subunit 1, cardiac muscle | ATP5A1   | 701389    |
| ATP synthase, H <sup>+</sup> transporting, mitochondrial F1 complex, beta polypeptide                | ATP5B    | 713284    |
| ATP synthase, H <sup>+</sup> transporting, mitochondrial F1 complex, delta subunit                   | ATP5D    | 705944    |
| ATP synthase, H <sup>+</sup> transporting, mitochondrial F1 complex, gamma polypeptide 1             | ATP5C1   | 713768    |
| ATP synthase, H <sup>+</sup> transporting, mitochondrial F1 complex, O subunit                       | ATP5O    | 698480    |
| ATP synthase, H <sup>+</sup> transporting, mitochondrial Fo complex subunit F6                       | ATP5J    | 708411    |
| ATPase inhibitory factor 1                                                                           | ATPIF1   | 716870    |
| ATPase type 13A1                                                                                     | ATP13A1  | 100427504 |
| ATPase, Ca <sup>++</sup> transporting, plasma membrane 1                                             | ATP2B1   | 709102    |
| ATPase, H <sup>+</sup> transporting, lysosomal 14kda, V1 subunit F                                   | ATP6V1F  | 702112    |
| ATPase, H <sup>+</sup> transporting, lysosomal 21kda, V0 subunit b                                   | ATP6V0B  | 702243    |
| ATPase, H <sup>+</sup> transporting, lysosomal 31kda, V1 subunit E1                                  | ATP6V1E1 | 709739    |
| ATPase, H <sup>+</sup> transporting, lysosomal 9kda, V0 subunit e1                                   | ATP6V0E1 | 703342    |
| ATPase, H <sup>+</sup> transporting, lysosomal accessory protein 2                                   | ATP6AP2  | 705048    |
| ATPase, H <sup>+</sup> /K <sup>+</sup> exchanging, alpha polypeptide                                 | ATP4A    | 100426216 |
| ATPase, Na <sup>+</sup> /K <sup>+</sup> transporting, alpha 1 polypeptide                            | ATP1A1   | 710368    |
| ATR interacting protein                                                                              | ATRIP    | 710035    |
| ATR serine/threonine kinase                                                                          | ATR      | 714443    |
| AT-rich interaction domain 2                                                                         | ARID2    | 703823    |
| AT-rich interaction domain 4B                                                                        | ARID4B   | 718320    |
| Aurora kinase A interacting protein 1                                                                | AURKAIP1 | 706329    |
| Aurora kinase B                                                                                      | AURKB    | 721955    |
| Aurora kinase C                                                                                      | AURKC    | 709801    |
| Autophagy related 16 like 1                                                                          | ATG16L1  | 714092    |
| Autophagy related 16 like 2                                                                          | ATG16L2  | 717952    |
| Autophagy related 2A                                                                                 | ATG2A    | 717290    |
| Autophagy related 3                                                                                  | ATG3     | 708305    |
| Autophagy related 4C, cysteine peptidase                                                             | ATG4C    | 695606    |
| Autophagy related 4D, cysteine peptidase                                                             | ATG4D    | 713111    |
| Autophagy related 5                                                                                  | ATG5     | 696874    |
| Autophagy related 7                                                                                  | ATG7     | 696238    |
| B9 protein domain 2                                                                                  | B9D2     | 704873    |
| Bardet-Biedl syndrome 12                                                                             | BBS12    | 710538    |
| Bardet-Biedl syndrome 4                                                                              | BBS4     | 704508    |
| Bardet-Biedl syndrome 5                                                                              | BBS5     | 709701    |
| Basic leucine zipper and W2 domains 2                                                                | BZW2     | 714627    |
| Basic transcription factor 3                                                                         | BTF3     | 703339    |
| B-cell CLL/lymphoma 6                                                                                | BCL6     | 708736    |
| B-cell CLL/lymphoma 7B                                                                               | BCL7B    | 716470    |
| B-cell translocation gene 1, anti-proliferative                                                      | BTG1     | 710112    |
| BCL2 associated athanogene 3                                                                         | BAG3     | 714420    |
| BCL2/adenovirus E1B 19kda interacting protein 2                                                      | BNIP2    | 703234    |

|                                                                      |         |        |
|----------------------------------------------------------------------|---------|--------|
| BCL2-associated X protein                                            | BAX     | 718948 |
| BCS1-like (S. Cerevisiae)                                            | BCS1L   | 699690 |
| Beclin 1, autophagy related                                          | BECN1   | 711649 |
| BEN domain containing 5                                              | BEND5   | 711150 |
| BEN domain containing 6                                              | BEND6   | 712498 |
| Beta-1,3-glucuronyltransferase 3                                     | B3GAT3  | 718744 |
| Beta-2-microglobulin                                                 | B2M     | 712428 |
| Bicaudal D homolog 2 (Drosophila)                                    | BICD2   | 706621 |
| Bisphosphoglycerate mutase                                           | BPGM    | 706741 |
| BLOC-1 related complex subunit 5                                     | BORCS5  | 696469 |
| Bloom syndrome, recq helicase-like                                   | BLM     | 703460 |
| Bola family member 1                                                 | BOLA1   | 705297 |
| Bola family member 3                                                 | BOLA3   | 707871 |
| Bone morphogenetic protein 1                                         | BMP1    | 707596 |
| Bone morphogenetic protein 4                                         | BMP4    | 694618 |
| Bone morphogenetic protein/retinoic acid inducible neural-specific 1 | BRINP1  | 701794 |
| Bora, aurora kinase A activator                                      | BORA    | 693798 |
| BPI fold containing family A member 2                                | BPIFA2  | 710376 |
| Brain protein I3                                                     | BRI3    | 706525 |
| Branched chain keto acid dehydrogenase E1, beta polypeptide          | BCKDHB  | 718472 |
| Branched chain ketoacid dehydrogenase kinase                         | BCKDK   | 712985 |
| BRCA1 associated RING domain 1                                       | BARD1   | 694301 |
| BRISC and BRCA1 A complex member 1                                   | BABAM1  | 718969 |
| Bromo adjacent homology domain containing 1                          | BAHD1   | 702982 |
| Bromodomain adjacent to zinc finger domain 1B                        | BAZ1B   | 716436 |
| Bromodomain containing 1                                             | BRD1    | 715059 |
| Bromodomain containing 2                                             | BRD2    | 717893 |
| Bromodomain containing 7                                             | BRD7    | 694850 |
| BTB (POZ) domain containing 1                                        | BTBD1   | 718696 |
| BTG family member 3                                                  | BTG3    | 710579 |
| BTG3 associated nuclear protein                                      | BANP    | 696125 |
| BUB3 mitotic checkpoint protein                                      | BUB3    | 708033 |
| Bystin like                                                          | BYSL    | 694976 |
| C2CD2-like                                                           | C2CD2L  | 703424 |
| Cadherin 11, type 2, OB-cadherin (osteoblast)                        | CDH11   | 708826 |
| Cadherin 2, type 1, N-cadherin (neuronal)                            | CDH2    | 711526 |
| Cadherin related family member 2                                     | CDHR2   | 697249 |
| Calcitonin-related polypeptide alpha                                 | CALCA   | 700649 |
| Calcium and integrin binding family member 2                         | CIB2    | 709429 |
| Calcium binding protein 39                                           | CAB39   | 711166 |
| Calcium binding tyrosine-(Y)-phosphorylation regulated               | CABYR   | 701670 |
| Calcium homeostasis endoplasmic reticulum protein                    | CHERP   | 718689 |
| Calcium/calmodulin-dependent protein kinase II delta                 | CAMK2D  | 702504 |
| Calcium/calmodulin-dependent protein kinase II gamma                 | CAMK2G  | 705980 |
| Calmin (calponin-like, transmembrane)                                | CLMN    | 709910 |
| Calmodulin regulated spectrin associated protein family member 2     | CAMSAP2 | 709092 |
| Calnexin                                                             | CANX    | 704794 |

|                                                                                  |          |           |
|----------------------------------------------------------------------------------|----------|-----------|
| Calpain 10                                                                       | CAPN10   | 716360    |
| Calpain 15                                                                       | CAPN15   | 695881    |
| Calpain 2, (m/II) large subunit                                                  | CAPN2    | 703047    |
| Calpain 3                                                                        | CAPN3    | 707913    |
| Calreticulin                                                                     | CALR     | 716910    |
| Camp responsive element binding protein 3                                        | CREB3    | 696350    |
| Camp responsive element binding protein 3-like 4                                 | CREB3L4  | 715951    |
| CAP, adenylate cyclase-associated protein 1 (yeast)                              | CAP1     | 693719    |
| Capping protein (actin filament) muscle Z-line, alpha 1                          | CAPZA1   | 705653    |
| Capping protein (actin filament), gelsolin-like                                  | CAPG     | 695288    |
| Caprin family member 2                                                           | CAPRIN2  | 693594    |
| Carbamoyl-phosphate synthetase 2, aspartate transcarbamylase, and dihydroorotase | CAD      | 699460    |
| Carbohydrate (chondroitin 4) sulfotransferase 13                                 | CHST13   | 716548    |
| Carbohydrate (keratan sulfate Gal-6) sulfotransferase 1                          | CHST1    | 715176    |
| Carbohydrate (N-acetylgalactosamine 4-O) sulfotransferase 14                     | CHST14   | 703115    |
| Carbohydrate (N-acetylgalactosamine 4-sulfate 6-O) sulfo transferase 15          | CHST15   | 693845    |
| Carbohydrate (N-acetylglucosamine 6-O) sulfotransferase 7                        | CHST7    | 704906    |
| Carboxypeptidase A5                                                              | CPA5     | 702974    |
| Carboxypeptidase N subunit 2                                                     | CPN2     | 106997192 |
| Carboxypeptidase Q                                                               | CPQ      | 701711    |
| Carboxypeptidase, vitellogenic-like                                              | CPVL     | 697111    |
| Cardiotrophin 1                                                                  | CTF1     | 713850    |
| Carnitine O-acetyltransferase                                                    | CRAT     | 716908    |
| Carnitine palmitoyltransferase 1B                                                | CPT1B    | 720697    |
| Carnosine dipeptidase 1 (metallopeptidase M20 family)                            | CNDP1    | 695195    |
| Cartilage acidic protein 1                                                       | CRTAC1   | 707486    |
| Casein kinase 2, alpha 1 polypeptide                                             | CSNK2A1  | 714841    |
| Casein kinase 2, beta polypeptide                                                | CSNK2B   | 715807    |
| Caspase 1                                                                        | CASP1    | 706568    |
| Caspase 4                                                                        | CASP4    | 704864    |
| Caspase 9                                                                        | CASP9    | 694544    |
| Caspase activity and apoptosis inhibitor 1                                       | CAAP1    | 707992    |
| Caspase recruitment domain family member 9                                       | CARD9    | 710485    |
| Cat eye syndrome chromosome region, candidate 5                                  | CECR5    | 709197    |
| Catalase                                                                         | CAT      | 717406    |
| Catechol-O-methyltransferase                                                     | COMT     | 712548    |
| Catenin alpha-like 1                                                             | CTNNAL1  | 710389    |
| Catenin delta 1                                                                  | CTNND1   | 704212    |
| Cathepsin A                                                                      | CTSA     | 708592    |
| Cathepsin B                                                                      | CTSB     | 100424760 |
| Cathepsin C                                                                      | CTSC     | 705320    |
| Cathepsin L                                                                      | CTSL     | 694569    |
| Cation channel, sperm associated 2                                               | CATSPER2 | 710876    |
| Caudal type homeobox 4                                                           | CDX4     | 701374    |
| Cbl proto-oncogene B, E3 ubiquitin protein ligase                                | CBLB     | 703879    |
| CCAAT/enhancer binding protein (C/EBP), zeta                                     | CEBPZ    | 712090    |

|                                                 |         |           |
|-------------------------------------------------|---------|-----------|
| CCR4-NOT transcription complex subunit 3        | CNOT3   | 693292    |
| CCR4-NOT transcription complex subunit 7        | CNOT7   | 702192    |
| CD19 molecule                                   | CD19    | 705211    |
| CD1c molecule                                   | CD1C    | 717148    |
| CD200 molecule                                  | CD200   | 708110    |
| CD274 molecule                                  | CD274   | 716043    |
| CD4 molecule                                    | CD4     | 713807    |
| CD63 molecule                                   | CD63    | 709828    |
| CD7 molecule                                    | CD7     | 719501    |
| CD9 molecule                                    | CD9     | 712262    |
| CDC like kinase 3                               | CLK3    | 702511    |
| CDC28 protein kinase regulatory subunit 1B      | CKS1B   | 717164    |
| Cell cycle and apoptosis regulator 2            | CCAR2   | 716288    |
| Cell death-inducing DFFA-like effector b        | CIDEB   | 100425328 |
| Cell division cycle 123                         | CDC123  | 694239    |
| Cell division cycle 16                          | CDC16   | 699089    |
| Cell division cycle 23                          | CDC23   | 714000    |
| Cell division cycle 25C                         | CDC25C  | 714115    |
| Cell division cycle 26                          | CDC26   | 706165    |
| Cell division cycle 37                          | CDC37   | 715390    |
| Cell division cycle 5 like                      | CDC5L   | 703099    |
| Cell division cycle 7                           | CDC7    | 704730    |
| Cell division cycle and apoptosis regulator 1   | CCAR1   | 693585    |
| Cell division cycle associated 3                | CDCA3   | 722088    |
| Cell division cycle associated 5                | CDCA5   | 721998    |
| Cell division cycle associated 7                | CDCA7   | 696474    |
| Cell division cycle associated 8                | CDCA8   | 719808    |
| Cell growth regulator with ring finger domain 1 | CGRRF1  | 695231    |
| Centrin 2                                       | CETN2   | 693376    |
| Centrin 3                                       | CETN3   | 695223    |
| Centriolin                                      | CNTRL   | 700200    |
| Centromere protein C                            | CENPC   | 710620    |
| Centromere protein F                            | CENPF   | 709000    |
| Centromere protein J                            | CENPJ   | 721498    |
| Centrosomal protein 192kda                      | CEP192  | 722121    |
| Centrosomal protein 290kda                      | CEP290  | 708286    |
| Centrosomal protein 41kda                       | CEP41   | 703215    |
| Centrosomal protein 57kda-like 1                | CEP57L1 | 700109    |
| Centrosomal protein 72kda                       | CEP72   | 708753    |
| Centrosomal protein 83kda                       | CEP83   | 711408    |
| Ceramide synthase 2                             | CERS2   | 716180    |
| Cerebellar degeneration related protein 2       | CDR2    | 698974    |
| CGG triplet repeat binding protein 1            | CGGBP1  | 693920    |
| Chaperonin containing TCP1, subunit 2 (beta)    | CCT2    | 717182    |
| Chaperonin containing TCP1, subunit 8 (theta)   | CCT8    | 706184    |
| Charged multivesicular body protein 2A          | CHMP2A  | 712059    |
| Charged multivesicular body protein 4B          | CHMP4B  | 709004    |
| Charged multivesicular body protein 5           | CHMP5   | 703191    |

|                                                         |             |           |
|---------------------------------------------------------|-------------|-----------|
| Checkpoint kinase 2                                     | CHEK2       | 713668    |
| Chemokine (C-C motif) ligand 27                         | CCL27       | 574220    |
| Chemokine (C-X-C motif) receptor 4                      | CXCR4       | 707329    |
| Chemokine-like factor                                   | CKLF        | 693673    |
| Chloride intracellular channel 4                        | CLIC4       | 712337    |
| Choline/ethanolamine phosphotransferase 1               | CEPT1       | 702700    |
| Chondroitin sulfate N-acetylgalactosaminyltransferase 2 | CSGALNACT2  | 703703    |
| Chromatin target of PRMT1                               | CHTOP       | 715501    |
| Chromobox 1                                             | CBX1        | 696673    |
| Chromodomain helicase DNA binding protein 1             | CHD1        | 702070    |
| Chromosome 1 open reading frame, human c1orf123         | C1H1orf123  | 714201    |
| Chromosome 1 open reading frame, human c1orf198         | C1H1orf198  | 714084    |
| Chromosome 1 open reading frame, human c1orf50          | C1H1orf50   | 698058    |
| Chromosome 1 open reading frame, human c1orf52          | C1H1orf52   | 711232    |
| Chromosome 1 open reading frame, human c1orf54          | C1H1orf54   | 107000832 |
| Chromosome 1 open reading frame, human c1orf74          | C1H1orf74   | 713029    |
| Chromosome 10 open reading frame, human c20orf27        | C10H20orf27 | 717525    |
| Chromosome 11 open reading frame, human c12orf4         | C11H12orf4  | 710836    |
| Chromosome 12 open reading frame, human c2orf47         | C12H2orf47  | 699322    |
| Chromosome 14 open reading frame, human c11orf68        | C14H11orf68 | 715318    |
| Chromosome 14 open reading frame, human c11orf73        | C14H11orf73 | 704098    |
| Chromosome 16 open reading frame, human c17orf62        | C16H17orf62 | 716212    |
| Chromosome 18 open reading frame, human c18orf21        | C18H18orf21 | 715440    |
| Chromosome 19 open reading frame, human c19orf53        | C19H19orf53 | 720745    |
| Chromosome 2 open reading frame, human c3orf18          | C2H3orf18   | 701675    |
| Chromosome 2 open reading frame, human c3orf58          | C2H3orf58   | 713830    |
| Chromosome 20 open reading frame 24 ortholog            | C10H20orf24 | 709696    |
| Chromosome 20 open reading frame, human c16orf13        | C20H16orf13 | 696495    |
| Chromosome 20 open reading frame, human c16orf78        | C20H16orf78 | 693672    |
| Chromosome 3 open reading frame, human c21orf91         | C3H21orf91  | 710406    |
| Chromosome 3 open reading frame, human c7orf25          | C3H7orf25   | 708455    |
| Chromosome 4 open reading frame, human c6orf1           | C4H6orf1    | 718551    |
| Chromosome 4 open reading frame, human c6orf136         | C4H6orf136  | 712108    |
| Chromosome 4 open reading frame, human c6orf203         | C4H6orf203  | 698108    |
| Chromosome 4 open reading frame, human c6orf89          | C4H6orf89   | 719165    |
| Chromosome 5 open reading frame, human c4orf27          | C5H4orf27   | 694607    |
| Chromosome 7 open reading frame, human c14orf142        | C7H14orf142 | 704509    |
| Chromosome 7 open reading frame, human c14orf166        | C7H14orf166 | 710094    |
| Chromosome 8 open reading frame, human c8orf59          | C8H8orf59   | 703464    |
| Chromosome 8 open reading frame, human c8orf76          | C8H8orf76   | 704150    |
| Chromosome 9 open reading frame, human c10orf2          | C9H10orf2   | 710958    |
| Chromosome X open reading frame, human cxorf23          | CXHXorf23   | 696449    |
| Cilia and flagella associated protein 43                | CFAP43      | 716031    |
| Cilia and flagella associated protein 65                | CFAP65      | 701296    |
| Ciliary neurotrophic factor                             | CNTF        | 701907    |
| Circadian associated repressor of transcription         | CIART       | 706693    |
| Citrate lyase beta like                                 | CLYBL       | 699339    |
| CKLF-like MARVEL transmembrane domain containing 8      | CMTM8       | 704234    |

|                                                          |         |        |
|----------------------------------------------------------|---------|--------|
| Clathrin, light chain A                                  | CLTA    | 693659 |
| Claudin 12                                               | CLDN12  | 704058 |
| Claudin 15                                               | CLDN15  | 719637 |
| Claudin 3                                                | CLDN3   | 716771 |
| Cleavage and polyadenylation factor I subunit 1          | CLP1    | 705071 |
| Cleavage and polyadenylation specific factor 4           | CPSF4   | 708119 |
| Cleavage stimulation factor, 3' pre-RNA, subunit 2       | CSTF2   | 701235 |
| Cleavage stimulation factor, 3' pre-RNA, subunit 3       | CSTF3   | 694040 |
| Cleft lip and palate associated transmembrane protein 1  | CLPTM1  | 718306 |
| Cms1 ribosomal small subunit homolog (yeast)             | CMSS1   | 699717 |
| Coatomer protein complex subunit beta 1                  | COPB1   | 699327 |
| Coatomer protein complex subunit zeta 1                  | COPZ1   | 705176 |
| Codanin 1                                                | CDAN1   | 708838 |
| Coenzyme Q10A                                            | COQ10A  | 712341 |
| Coenzyme Q2 4-hydroxybenzoate polyprenyltransferase      | COQ2    | 707681 |
| Cofilin 1 (non-muscle)                                   | CFL1    | 721882 |
| Cofilin 2 (muscle)                                       | CFL2    | 693875 |
| Coiled-coil domain containing 12                         | CCDC12  | 712061 |
| Coiled-coil domain containing 174                        | CCDC174 | 701654 |
| Coiled-coil domain containing 181                        | CCDC181 | 700803 |
| Coiled-coil domain containing 28A                        | CCDC28A | 703104 |
| Coiled-coil domain containing 36                         | CCDC36  | 707136 |
| Coiled-coil domain containing 43                         | CCDC43  | 715325 |
| Coiled-coil domain containing 59                         | CCDC59  | 698443 |
| Coiled-coil domain containing 92                         | CCDC92  | 705922 |
| Coiled-coil domain containing 97                         | CCDC97  | 706342 |
| Coiled-coil serine rich protein 2                        | CCSER2  | 698006 |
| Coiled-coil-helix-coiled-coil-helix domain containing 10 | CHCHD10 | 720205 |
| Coiled-coil-helix-coiled-coil-helix domain containing 6  | CHCHD6  | 716767 |
| Cold shock domain containing E1, RNA binding             | CSDE1   | 708897 |
| Collagen, type III, alpha 1                              | COL3A1  | 574131 |
| Collagen, type XII, alpha 1                              | COL12A1 | 717820 |
| COMM domain containing 2                                 | COMMD2  | 711498 |
| COMM domain containing 6                                 | COMMD6  | 695191 |
| Complement component 1, q subcomponent binding protein   | C1QBP   | 711817 |
| Complement factor properdin                              | CFP     | 707386 |
| Component of oligomeric golgi complex 1                  | COG1    | 695754 |
| Component of oligomeric golgi complex 4                  | COG4    | 712103 |
| Conserved helix-loop-helix ubiquitous kinase             | CHUK    | 709511 |
| Coordinator of PRMT5, differentiation stimulator         | COPRS   | 713293 |
| COP9 signalosome subunit 2                               | COPS2   | 714814 |
| COP9 signalosome subunit 3                               | COPS3   | 698461 |
| COP9 signalosome subunit 4                               | COPS4   | 693435 |
| COP9 signalosome subunit 5                               | COPS5   | 704584 |
| COP9 signalosome subunit 6                               | COPS6   | 710667 |
| Copine II                                                | CPNE2   | 703557 |
| Core-binding factor, beta subunit                        | CBFB    | 695767 |
| Core-binding factor, runt domain, alpha subunit 2;       | CBFA2T3 | 698233 |

|                                                                  |         |        |
|------------------------------------------------------------------|---------|--------|
| translocated to, 3                                               |         |        |
| Cornichon family AMPA receptor auxiliary protein 1               | CNIH1   | 695002 |
| Cornichon family AMPA receptor auxiliary protein 4               | CNIH4   | 701767 |
| Coronin, actin binding protein, 1B                               | CORO1B  | 721725 |
| Cortactin                                                        | CTTN    | 708291 |
| Cryptochrome circadian clock 1                                   | CRY1    | 703752 |
| CSE1 chromosome segregation 1-like (yeast)                       | CSE1L   | 704301 |
| C-src tyrosine kinase                                            | CSK     | 702868 |
| CTD phosphatase subunit 1                                        | CTDP1   | 698467 |
| CTD small phosphatase like 2                                     | CTDSPL2 | 711917 |
| C-terminal binding protein 1                                     | CTBP1   | 694507 |
| CTP synthase 1                                                   | CTPS1   | 695498 |
| CTR9 homolog, Paf1/RNA polymerase II complex component           | CTR9    | 705748 |
| C-type lectin domain family 1, member A                          | CLEC1A  | 717526 |
| C-type lectin domain family 9 member A                           | CLEC9A  | 717472 |
| CUE domain containing 2                                          | CUEDC2  | 713243 |
| CUGBP, Elav-like family member 3                                 | CELF3   | 716884 |
| Cullin 4A                                                        | CUL4A   | 714302 |
| Cullin 7                                                         | CUL7    | 699545 |
| Cutc copper transporter                                          | CUTC    | 709050 |
| CWC15 spliceosome-associated protein                             | CWC15   | 698332 |
| CWF19-like 2, cell cycle control (S. Pombe)                      | CWF19L2 | 706825 |
| C-x(9)-C motif containing 1                                      | CMC1    | 705147 |
| Cyclic nucleotide binding domain containing 2                    | CNBD2   | 703290 |
| Cyclin A2                                                        | CCNA2   | 707259 |
| Cyclin and CBS domain divalent metal cation transport mediator 2 | CNNM2   | 714238 |
| Cyclin B2                                                        | CCNB2   | 702184 |
| Cyclin D3                                                        | CCND3   | 695215 |
| Cyclin D-type binding-protein 1                                  | CCNDBP1 | 709589 |
| Cyclin E1                                                        | CCNE1   | 700589 |
| Cyclin G1                                                        | CCNG1   | 697738 |
| Cyclin H                                                         | CCNH    | 694224 |
| Cyclin I                                                         | CCNI    | 677687 |
| Cyclin T2                                                        | CCNT2   | 708813 |
| Cyclin-dependent kinase 1                                        | CDK1    | 699269 |
| Cyclin-dependent kinase 12                                       | CDK12   | 696733 |
| Cyclin-dependent kinase 14                                       | CDK14   | 703442 |
| Cyclin-dependent kinase 17                                       | CDK17   | 717183 |
| Cyclin-dependent kinase 2                                        | CDK2    | 711002 |
| Cyclin-dependent kinase 4                                        | CDK4    | 715650 |
| Cyclin-dependent kinase 9                                        | CDK9    | 699840 |
| Cyclin-dependent kinase inhibitor 2C (p18, inhibits CDK4)        | CDKN2C  | 711877 |
| Cyclin-dependent kinase inhibitor 2D (p19, inhibits CDK4)        | CDKN2D  | 713172 |
| Cystatin C                                                       | CST3    | 574313 |
| Cysteine/histidine-rich 1                                        | CYHR1   | 702522 |
| CysteinyI-trna synthetase                                        | CARS    | 706502 |
| CysteinyI-trna synthetase 2, mitochondrial (putative)            | CARS2   | 694840 |
| Cytidine monophosphate (UMP-CMP) kinase 1, cytosolic             | CMPK1   | 710196 |

|                                                              |         |           |
|--------------------------------------------------------------|---------|-----------|
| Cytidine monophosphate N-acetylneuraminic acid synthetase    | CMAS    | 706604    |
| Cytochrome b-245 heavy chain                                 | CYBB    | 696542    |
| Cytochrome c oxidase subunit 5A                              | COX5A   | 692061    |
| Cytochrome c oxidase subunit 6C                              | COX6C   | 100428416 |
| Cytochrome c oxidase subunit IV isoform 1                    | COX4I1  | 693811    |
| Cytochrome c oxidase subunit viic                            | COX7C   | 100429280 |
| Cytochrome c-1                                               | CYC1    | 700518    |
| Cytochrome P450, family 2, subfamily D, polypeptide 6        | CYP2D6  | 678691    |
| Cytochrome P450, family 21, subfamily A, polypeptide 2       | CYP21A2 | 717020    |
| Cytochrome P450c17                                           | CYP17A1 | 678693    |
| Cytoplasmic polyadenylation element binding protein 2        | CPEB2   | 722844    |
| Cytoskeleton associated protein 2 like                       | CKAP2L  | 704381    |
| Cytoskeleton associated protein 5                            | CKAP5   | 714095    |
| Cytosolic thiouridylase subunit 1                            | CTU1    | 719536    |
| Dachshund family transcription factor 1                      | DACH1   | 693532    |
| Dachsous cadherin-related 1                                  | DCHS1   | 711938    |
| DALR anticodon binding domain containing 3                   | DALRD3  | 708403    |
| DCN1, defective in cullin neddylation 1, domain containing 1 | DCUN1D1 | 708357    |
| DCN1, defective in cullin neddylation 1, domain containing 4 | DCUN1D4 | 702908    |
| DCN1, defective in cullin neddylation 1, domain containing 5 | DCUN1D5 | 704099    |
| DDB1 and CUL4 associated factor 11                           | DCAF11  | 714867    |
| DDB1 and CUL4 associated factor 4                            | DCAF4   | 695337    |
| DDB1 and CUL4 associated factor 6                            | DCAF6   | 698686    |
| D-dopachrome tautomerase                                     | DDT     | 699933    |
| DEAD (Asp-Glu-Ala-Asp) box helicase 1                        | DDX1    | 698327    |
| DEAD (Asp-Glu-Ala-Asp) box helicase 5                        | DDX5    | 677694    |
| DEAD (Asp-Glu-Ala-Asp) box polypeptide 27                    | DDX27   | 703852    |
| DEAD (Asp-Glu-Ala-Asp) box polypeptide 39A                   | DDX39A  | 718822    |
| DEAD (Asp-Glu-Ala-Asp) box polypeptide 41                    | DDX41   | 700742    |
| DEAD (Asp-Glu-Ala-Asp) box polypeptide 54                    | DDX54   | 712763    |
| DEAD/H (Asp-Glu-Ala-Asp/His) box polypeptide 26B             | DDX26B  | 709688    |
| Deafness, autosomal recessive 31                             | DFNB31  | 708051    |
| DEAH (Asp-Glu-Ala-His) box helicase 15                       | DHX15   | 715852    |
| DEAH (Asp-Glu-Ala-His) box helicase 30                       | DHX30   | 711178    |
| DEAH (Asp-Glu-Ala-His) box helicase 9                        | DHX9    | 715453    |
| DEAH (Asp-Glu-Ala-His) box polypeptide 29                    | DHX29   | 706306    |
| DEAH (Asp-Glu-Ala-His) box polypeptide 38                    | DHX38   | 709173    |
| Death associated protein 3                                   | DAP3    | 719314    |
| Death inducer-obliterators 1                                 | DIDO1   | 698313    |
| Decapping exoribonuclease                                    | DXO     | 716027    |
| Decapping mrna 1B                                            | DCP1B   | 708089    |
| Dedicator of cytokinesis 5                                   | DOCK5   | 711359    |
| Defender against cell death 1                                | DAD1    | 711840    |
| Defensin beta 118                                            | DEFB118 | 641438    |
| Dehydrodolichyl diphosphate synthase subunit                 | DHDDS   | 714635    |
| Dehydrogenase/reductase (SDR family) member 1                | DHRS1   | 715933    |
| Dehydrogenase/reductase (SDR family) member 3                | DHRS3   | 715548    |
| Deiodinase, iodothyronine, type II                           | DIO2    | 707484    |



|                                                                          |         |           |
|--------------------------------------------------------------------------|---------|-----------|
| DEK proto-oncogene                                                       | DEK     | 712460    |
| Delta-like 1 homolog (Drosophila)                                        | DLK1    | 707595    |
| Deltex 3, E3 ubiquitin ligase                                            | DTX3    | 715175    |
| DENN/MADD domain containing 5A                                           | DENND5A | 707945    |
| Denticleless E3 ubiquitin protein ligase homolog (Drosophila)            | DTL     | 711236    |
| Deoxyguanosine kinase                                                    | DGUOK   | 707554    |
| Deoxyhypusine synthase                                                   | DHPS    | 716213    |
| Deoxythymidylate kinase                                                  | DTYMK   | 701781    |
| Derlin 1                                                                 | DERL1   | 703803    |
| Derlin 2                                                                 | DERL2   | 712051    |
| Dermatan sulfate epimerase                                               | DSE     | 716054    |
| Desmoplakin                                                              | DSP     | 694860    |
| Desumoylating isopeptidase 2                                             | DESI2   | 713515    |
| Developmentally regulated GTP binding protein 1                          | DRG1    | 716791    |
| Dexi homolog (mouse)                                                     | DEXI    | 100430904 |
| Dicer 1, ribonuclease type III                                           | DICER1  | 702516    |
| Dihydrolipoamide S-acetyltransferase                                     | DLAT    | 710930    |
| Dihydropyrimidinase like 3                                               | DPYSL3  | 708425    |
| Dihydrouridine synthase 3-like                                           | DUS3L   | 719524    |
| Dimethylarginine dimethylaminohydrolase 1                                | DDAH1   | 711395    |
| Dipeptidyl-peptidase 8                                                   | DPP8    | 709428    |
| Diphosphoinositol pentakisphosphate kinase 2                             | PPIP5K2 | 703458    |
| Discoidin domain receptor tyrosine kinase 1                              | DDR1    | 714233    |
| Discoidin domain receptor tyrosine kinase 2                              | DDR2    | 720124    |
| Discs, large homolog 1 (Drosophila)                                      | DLG1    | 709572    |
| Discs, large homolog 5 (Drosophila)                                      | DLG5    | 703123    |
| Dishevelled segment polarity protein 1                                   | DVL1    | 705864    |
| Dispatched homolog 1 (Drosophila)                                        | DISP1   | 703960    |
| Distal-less homeobox 5                                                   | DLX5    | 697853    |
| DNA (cytosine-5-)-methyltransferase 1                                    | DNMT1   | 574321    |
| DNA cross-link repair 1B                                                 | DCLRE1B | 707742    |
| Dnaj heat shock protein family (Hsp40) member A1                         | DNAJA1  | 703765    |
| Dnaj heat shock protein family (Hsp40) member B1                         | DNAJB1  | 718890    |
| Dnaj heat shock protein family (Hsp40) member C1                         | DNAJC1  | 704151    |
| Dnaj heat shock protein family (Hsp40) member C12                        | DNAJC12 | 695795    |
| Dnaj heat shock protein family (Hsp40) member C27                        | DNAJC27 | 694037    |
| Dnaj heat shock protein family (Hsp40) member C3                         | DNAJC3  | 695757    |
| Dnaj heat shock protein family (Hsp40) member C5 beta                    | DNAJC5B | 702408    |
| Dnaj heat shock protein family (Hsp40) member C8                         | DNAJC8  | 720231    |
| Dnaj heat shock protein family (Hsp40) member C9                         | DNAJC9  | 707599    |
| Docking protein 5                                                        | DOK5    | 698689    |
| Dolichyl-phosphate mannosyltransferase polypeptide 2, regulatory subunit | DPM2    | 698709    |
| Double C2-like domains, alpha                                            | DOC2A   | 707895    |
| Double zinc ribbon and ankyrin repeat domains 1                          | DZANK1  | 700143    |
| DR1-associated protein 1 (negative cofactor 2 alpha)                     | DRAP1   | 715271    |
| Drosha, ribonuclease type III                                            | DROSHA  | 692081    |
| DTW domain containing 1                                                  | DTWD1   | 715084    |

|                                                                  |         |        |
|------------------------------------------------------------------|---------|--------|
| D-tyrosyl-trna deacylase 1                                       | DTD1    | 700895 |
| Dual serine/threonine and tyrosine protein kinase                | DSTYK   | 664732 |
| Dual specificity phosphatase 11                                  | DUSP11  | 707123 |
| Dual specificity phosphatase 12                                  | DUSP12  | 720034 |
| Dual specificity phosphatase 14                                  | DUSP14  | 714383 |
| Dual specificity phosphatase 23                                  | DUSP23  | 719474 |
| Dual specificity phosphatase 26 (putative)                       | DUSP26  | 697134 |
| Dual specificity phosphatase 6                                   | DUSP6   | 708907 |
| Dual specificity tyrosine-(Y)-phosphorylation regulated kinase 3 | DYRK3   | 695163 |
| Dynactin subunit 1                                               | DCTN1   | 708290 |
| Dynactin subunit 2                                               | DCTN2   | 714948 |
| Dynactin subunit 6                                               | DCTN6   | 694273 |
| Dynamin 1-like                                                   | DNM1L   | 695388 |
| Dynein, axonemal, assembly factor 2                              | DNAAF2  | 719026 |
| Dynein, light chain, LC8-type 1                                  | DYNLL1  | 702360 |
| Dynein, light chain, roadblock-type 2                            | DYNLRB2 | 713503 |
| E1A binding protein p300                                         | EP300   | 706258 |
| E2F transcription factor 1                                       | E2F1    | 714126 |
| E2F transcription factor 3                                       | E2F3    | 713904 |
| E2F transcription factor 4, p107/p130-binding                    | E2F4    | 696864 |
| E2F transcription factor 5, p130-binding                         | E2F5    | 703352 |
| E2F-associated phosphoprotein                                    | EAPP    | 714727 |
| E74-like factor 2 (ets domain transcription factor)              | ELF2    | 696760 |
| E74-like factor 5 (ets domain transcription factor)              | ELF5    | 717377 |
| Ecdysoneless homolog (Drosophila)                                | ECD     | 707699 |
| Ectodermal-neural cortex 1 (with BTB domain)                     | ENC1    | 704577 |
| Ectodysplasin A receptor                                         | EDAR    | 695059 |
| Ectonucleotide pyrophosphatase/phosphodiesterase 2               | ENPP2   | 705287 |
| EF-hand calcium binding domain 7                                 | EFCAB7  | 696830 |
| EF-hand domain family member D2                                  | EFHD2   | 694155 |
| EGF-like, fibronectin type III and laminin G domains             | EGFLAM  | 693314 |
| EGF-like-domain, multiple 7                                      | EGFL7   | 709840 |
| EGF-like-domain, multiple 8                                      | EGFL8   | 717145 |
| Egl-9 family hypoxia-inducible factor 2                          | EGLN2   | 703083 |
| EH domain binding protein 1                                      | EHBP1   | 693902 |
| Electron-transferring-flavoprotein dehydrogenase                 | ETFDH   | 701207 |
| ELMO/CED-12 domain containing 2                                  | ELMOD2  | 698742 |
| ELOVL fatty acid elongase 1                                      | ELOVL1  | 700557 |
| ELOVL fatty acid elongase 4                                      | ELOVL4  | 692070 |
| Embryonic ectoderm development                                   | EED     | 703866 |
| Emopamil binding protein (sterol isomerase)                      | EBP     | 714315 |
| Endonuclease G                                                   | ENDOG   | 717171 |
| Endoplasmic reticulum lectin 1                                   | ERLEC1  | 716460 |
| Endothelin 3                                                     | EDN3    | 693385 |
| Enhancer of rudimentary homolog (Drosophila)                     | ERH     | 712507 |
| Enhancer of yellow 2 homolog (Drosophila)                        | ENY2    | 699048 |
| Enhancer of zeste 1 polycomb repressive complex 2 subunit        | EZH1    | 711173 |
| Enolase 1, (alpha)                                               | ENO1    | 709378 |

|                                                               |          |           |
|---------------------------------------------------------------|----------|-----------|
| Enoyl-coa delta isomerase 2                                   | ECI2     | 709579    |
| EPH receptor B6                                               | EPHB6    | 704886    |
| Epididymal protein 3A                                         | EDDM3A   | 704355    |
| Epithelial cell transforming 2                                | ECT2     | 694056    |
| ER degradation enhancer, mannosidase alpha-like 3             | EDEM3    | 714475    |
| ER membrane protein complex subunit 4                         | EMC4     | 695907    |
| ER membrane protein complex subunit 6                         | EMC6     | 707030    |
| ERGIC and golgi 3                                             | ERGIC3   | 704736    |
| ESF1 nucleolar pre-rrna processing protein homolog            | ESF1     | 694159    |
| Esterase D                                                    | ESD      | 708871    |
| Ethanolamine-phosphate phospho-lyase                          | ETNPPL   | 696880    |
| Eukaryotic translation elongation factor 1 beta 2             | EEF1B2   | 707019    |
| Eukaryotic translation elongation factor 1 epsilon 1          | EEF1E1   | 695426    |
| Eukaryotic translation elongation factor 1 gamma              | EEF1G    | 722274    |
| Eukaryotic translation initiation factor 2 subunit beta       | EIF2S2   | 708593    |
| Eukaryotic translation initiation factor 2-alpha kinase 3     | EIF2AK3  | 699575    |
| Eukaryotic translation initiation factor 2D                   | EIF2D    | 695274    |
| Eukaryotic translation initiation factor 3 subunit D          | EIF3D    | 695051    |
| Eukaryotic translation initiation factor 3 subunit E          | EIF3E    | 697622    |
| Eukaryotic translation initiation factor 3 subunit H          | EIF3H    | 700517    |
| Eukaryotic translation initiation factor 3 subunit K          | EIF3K    | 693536    |
| Eukaryotic translation initiation factor 3 subunit L          | EIF3L    | 699189    |
| Eukaryotic translation initiation factor 3 subunit M          | EIF3M    | 695698    |
| Eukaryotic translation initiation factor 4A2                  | EIF4A2   | 707775    |
| Eukaryotic translation initiation factor 4A3                  | EIF4A3   | 712141    |
| Eukaryotic translation initiation factor 4E binding protein 2 | EIF4EBP2 | 100424760 |
| Eukaryotic translation initiation factor 4E binding protein 3 | EIF4EBP3 | 100532736 |
| Eukaryotic translation initiation factor 4E family member 2   | EIF4E2   | 713487    |
| Eukaryotic translation initiation factor 4H                   | EIF4H    | 693429    |
| Eukaryotic translation termination factor 1                   | ETF1     | 714449    |
| Eva-1 homolog B (C. Elegans)                                  | EVA1B    | 713159    |
| EWS RNA binding protein 1                                     | EWSR1    | 714432    |
| Excision repair cross-complementation group 3                 | ERCC3    | 698829    |
| Exocyst complex component 1                                   | EXOC1    | 695664    |
| Exocyst complex component 2                                   | EXOC2    | 706296    |
| Exocyst complex component 4                                   | EXOC4    | 712458    |
| Exosome component 10                                          | EXOSC10  | 714153    |
| Exosome component 3                                           | EXOSC3   | 716347    |
| Exostosin glycosyltransferase 1                               | EXT1     | 701488    |
| Exostosin glycosyltransferase 2                               | EXT2     | 715975    |
| Exportin 1                                                    | XPO1     | 718063    |
| Exportin 5                                                    | XPO5     | 700664    |
| Exportin 6                                                    | XPO6     | 704332    |
| Extended synaptotagmin-like protein 1                         | ESYT1    | 711720    |
| Extra spindle pole bodies like 1, separase                    | ESPL1    | 702136    |
| F11 receptor                                                  | F11R     | 719824    |
| Family with sequence similarity 104 member A                  | FAM104A  | 695865    |
| Family with sequence similarity 110 member B                  | FAM110B  | 703840    |

|                                                                                |          |        |
|--------------------------------------------------------------------------------|----------|--------|
| Family with sequence similarity 117 member A                                   | FAM117A  | 700079 |
| Family with sequence similarity 129 member B                                   | FAM129B  | 707403 |
| Family with sequence similarity 156 member B                                   | FAM156B  | 698392 |
| Family with sequence similarity 160 member A2                                  | FAM160A2 | 711641 |
| Family with sequence similarity 171 member B                                   | FAM171B  | 712442 |
| Family with sequence similarity 175 member B                                   | FAM175B  | 694886 |
| Family with sequence similarity 178 member B                                   | FAM178B  | 710890 |
| Family with sequence similarity 179 member B                                   | FAM179B  | 702188 |
| Family with sequence similarity 181 member B                                   | FAM181B  | 701184 |
| Family with sequence similarity 212 member A                                   | FAM212A  | 704983 |
| Family with sequence similarity 219 member A                                   | FAM219A  | 700651 |
| Family with sequence similarity 220 member A                                   | FAM220A  | 703785 |
| Family with sequence similarity 35 member A                                    | FAM35A   | 694102 |
| Family with sequence similarity 58 member A                                    | FAM58A   | 695925 |
| Family with sequence similarity 76 member B                                    | FAM76B   | 699581 |
| Family with sequence similarity 8 member A1                                    | FAM8A1   | 703789 |
| Family with sequence similarity 92 member A1                                   | FAM92A1  | 698794 |
| Fanconi anemia complementation group E                                         | FANCE    | 718889 |
| Farnesyl-diphosphate farnesyltransferase 1                                     | FDFT1    | 696396 |
| Farnesyltransferase, CAAX box, beta                                            | FNTB     | 708129 |
| Fas apoptotic inhibitory molecule                                              | FAIM     | 716216 |
| Fasciculation and elongation protein zeta 1                                    | FEZ1     | 713106 |
| Fasciculation and elongation protein zeta 2 (zygin II)                         | FEZ2     | 708288 |
| FAST kinase domains 1                                                          | FASTKD1  | 706154 |
| Fat storage-inducing transmembrane protein 1                                   | FITM1    | 715085 |
| Fatty acid binding protein 7, brain                                            | FABP7    | 713762 |
| Fatty acyl coa reductase 1                                                     | FAR1     | 699947 |
| F-box and WD repeat domain containing 4                                        | FBXW4    | 711996 |
| F-box and WD repeat domain containing 7                                        | FBXW7    | 695101 |
| F-box protein 11                                                               | FBXO11   | 715651 |
| F-box protein 4                                                                | FBXO4    | 697007 |
| FCH and double SH3 domains 2                                                   | FCHSD2   | 717996 |
| Feline leukemia virus subgroup C cellular receptor 1                           | FLVCR1   | 710008 |
| Fem-1 homolog b (C. Elegans)                                                   | FEM1B    | 693955 |
| FERM domain containing 3                                                       | FRMD3    | 713394 |
| Fetal and adult testis expressed 1                                             | FATE1    | 704368 |
| Fibrillarlin                                                                   | FBL      | 700286 |
| Fibroblast activation protein alpha                                            | FAP      | 701541 |
| Fibroblast growth factor 13                                                    | FGF13    | 695460 |
| Fibroblast growth factor 16                                                    | FGF16    | 705612 |
| Fibroblast growth factor receptor substrate 3                                  | FRS3     | 694462 |
| Fibronectin type III domain containing 4                                       | FNDC4    | 702098 |
| FIG4 phosphoinositide 5-phosphatase                                            | FIG4     | 699914 |
| Filamin B, beta                                                                | FLNB     | 702732 |
| Filamin binding LIM protein 1                                                  | FBLIM1   | 695727 |
| Finkel-Biskis-Reilly murine sarcoma virus (FBR-musv)<br>ubiquitously expressed | FAU      | 716761 |
| FK506 binding protein 11                                                       | FKBP11   | 708598 |

|                                                                        |           |        |
|------------------------------------------------------------------------|-----------|--------|
| FK506 binding protein 7                                                | FKBP7     | 703299 |
| FK506 binding protein 9                                                | FKBP9     | 708827 |
| Flavin adenine dinucleotide synthetase 1                               | FLAD1     | 717133 |
| Flightless I actin binding protein                                     | FLII      | 700471 |
| FLYWCH-type zinc finger 1                                              | FLYWCH1   | 700909 |
| Follistatin like 1                                                     | FSTL1     | 713367 |
| Formin homology 2 domain containing 1                                  | FHOD1     | 697346 |
| Four and a half LIM domains 2                                          | FHL2      | 713222 |
| Fragile X mental retardation, autosomal homolog 1                      | FXR1      | 710170 |
| FRAS1 related extracellular matrix 1                                   | FREM1     | 713874 |
| Frataxin                                                               | FXN       | 699469 |
| Frizzled class receptor 6                                              | FZD6      | 694625 |
| Ftsj RNA methyltransferase homolog 1 (E. Coli)                         | FTSJ1     | 710243 |
| Fumarylacetoacetate hydrolase (fumarylacetoacetase)                    | FAH       | 712716 |
| FUN14 domain containing 1                                              | FUNDC1    | 709370 |
| Fuzzy planar cell polarity protein                                     | FUZ       | 719442 |
| FXYP domain containing ion transport regulator 7                       | FXYP7     | 718457 |
| FYN proto-oncogene, Src family tyrosine kinase                         | FYN       | 574214 |
| FYVE, rhogef and PH domain containing 2                                | FGD2      | 719329 |
| G elongation factor, mitochondrial 2                                   | GFM2      | 704247 |
| G kinase anchoring protein 1                                           | GKAP1     | 708816 |
| G protein pathway suppressor 1                                         | GPS1      | 719343 |
| G protein-coupled bile acid receptor 1                                 | GPBAR1    | 697937 |
| G protein-coupled receptor 135                                         | GPR135    | 701843 |
| G protein-coupled receptor 151                                         | GPR151    | 708020 |
| G protein-coupled receptor 31                                          | GPR31     | 717158 |
| G protein-coupled receptor 89A                                         | GPR89A    | 696579 |
| G protein-coupled receptor kinase interacting arfgap 2                 | GIT2      | 708092 |
| G2/M-phase specific E3 ubiquitin protein ligase                        | G2E3      | 717021 |
| GA binding protein transcription factor, beta subunit 1                | GABPB1    | 715334 |
| GABA(A) receptor-associated protein like 2                             | GABARAPL2 | 714413 |
| Galactosidase alpha                                                    | GLA       | 703129 |
| Gametogenetin binding protein 2                                        | GGNBP2    | 713750 |
| Gamma-glutamyl hydrolase (conjugase, folylpolygammaglutamyl hydrolase) | GGH       | 700747 |
| Gamma-glutamylcyclotransferase                                         | GGCT      | 695547 |
| Gap junction protein alpha 1                                           | GJA1      | 714344 |
| GATA binding protein 2                                                 | GATA2     | 705551 |
| GCN1, eif2 alpha kinase activator homolog                              | GCN1      | 698528 |
| GC-rich promoter binding protein 1                                     | GPBP1     | 708322 |
| GC-rich promoter binding protein 1-like 1                              | GPBP1L1   | 706690 |
| GDP-mannose 4,6-dehydratase                                            | GMDS      | 707051 |
| GDP-mannose pyrophosphorylase B                                        | GMPPB     | 705454 |
| General transcription factor IIA 2                                     | GTF2A2    | 702984 |
| General transcription factor IIB                                       | GTF2B     | 694770 |
| General transcription factor IIE subunit 2                             | GTF2E2    | 694622 |
| General transcription factor IIH subunit 5                             | GTF2H5    | 700107 |
| General transcription factor IIIA                                      | GTF3A     | 710492 |

|                                                                             |         |           |
|-----------------------------------------------------------------------------|---------|-----------|
| General transcription factor IIIC subunit 4                                 | GTF3C4  | 714849    |
| General transcription factor IIIC subunit 6                                 | GTF3C6  | 696512    |
| Geranylgeranyl diphosphate synthase 1                                       | GGPS1   | 100425248 |
| Germ cell-less, spermatogenesis associated 1                                | GMCL1   | 701545    |
| GID complex subunit 8                                                       | GID8    | 698189    |
| GIN5 complex subunit 2 (Psf2 homolog)                                       | GIN52   | 693426    |
| GLE1, RNA export mediator                                                   | GLE1    | 717474    |
| GLI family zinc finger 1                                                    | GLI1    | 714843    |
| Glucokinase (hexokinase 4) regulator                                        | GCKR    | 701431    |
| Glucose-fructose oxidoreductase domain containing 1                         | GFOD1   | 700607    |
| Glucosidase, beta (bile acid) 2                                             | GBA2    | 696062    |
| Glutamate-cysteine ligase, catalytic subunit                                | GCLC    | 710508    |
| Glutamic-oxaloacetic transaminase 2                                         | GOT2    | 707896    |
| Glutamine--fructose-6-phosphate transaminase 1                              | GFPT1   | 574376    |
| Glutaminyl-trna synthetase                                                  | QARS    | 708111    |
| Glutaredoxin 5                                                              | GLRX5   | 702989    |
| Glutathione peroxidase 1                                                    | GPX1    | 706732    |
| Glutathione peroxidase 8 (putative)                                         | GPX8    | 705965    |
| Glutathione S-transferase alpha 4                                           | GSTA4   | 709666    |
| Glutathione S-transferase omega 1                                           | GSTO1   | 716078    |
| Glutathione S-transferase omega 2                                           | GSTO2   | 715291    |
| Glutathione S-transferase, C-terminal domain containing                     | GSTCD   | 694220    |
| Glycerol-3-phosphate acyltransferase, mitochondrial                         | GPAM    | 696042    |
| Glycophorin C (Gerbich blood group)                                         | GYPE    | 712092    |
| Glycosylphosphatidylinositol anchor attachment 1                            | GPAA1   | 699887    |
| Glycosyltransferase 8 domain containing 1                                   | GLT8D1  | 695999    |
| Glycosyltransferase like domain containing 1                                | GTDC1   | 100424584 |
| Golgi reassembly stacking protein 2                                         | GORASP2 | 694170    |
| Golgi-associated, gamma adaptin ear containing, ARF binding protein 3       | GGA3    | 705751    |
| Golgin A7                                                                   | GOLGA7  | 709911    |
| Golgin B1                                                                   | GOLGB1  | 713993    |
| Grancalcin                                                                  | GCA     | 702138    |
| Granulysin                                                                  | GNLY    | 696059    |
| GRB2-related adaptor protein                                                | GRAP    | 702473    |
| Gremlin 2, DAN family BMP antagonist                                        | GREM2   | 708280    |
| Growth arrest and DNA damage inducible beta                                 | GADD45B | 711257    |
| Growth arrest and DNA damage inducible gamma                                | GADD45G | 697835    |
| Growth arrest specific 6                                                    | GAS6    | 716066    |
| Growth differentiation factor 7                                             | GDF7    | 702462    |
| Growth factor receptor bound protein 10                                     | GRB10   | 694786    |
| Growth hormone inducible transmembrane protein                              | GHITM   | 702691    |
| Growth hormone secretagogue receptor                                        | GHSR    | 694587    |
| GRP1 (general receptor for phosphoinositides 1)-associated scaffold protein | GRASP   | 696547    |
| Gtpase activating protein (SH3 domain) binding protein 1                    | G3BP1   | 713884    |
| Gtpase, IMAP family member 4                                                | GIMAP4  | 713506    |
| Guanidinoacetate N-methyltransferase                                        | GAMT    | 721263    |

|                                                                           |           |        |
|---------------------------------------------------------------------------|-----------|--------|
| Guanine nucleotide binding protein (G protein), beta polypeptide 2-like 1 | GNB2L1    | 708526 |
| Guanine nucleotide binding protein (G protein), gamma 10                  | GNG10     | 708193 |
| Guanine nucleotide binding protein (G protein), gamma 11                  | GNG11     | 700606 |
| Guanosine monophosphate reductase 2                                       | GMPR2     | 715719 |
| Guanylate kinase 1                                                        | GUK1      | 695272 |
| H2A histone family, member X                                              | H2AFX     | 703073 |
| H2A histone family, member Y                                              | H2AFY     | 711836 |
| H2A histone family, member Y2                                             | H2AFY2    | 711117 |
| H2A histone family, member Z                                              | H2AFZ     | 709326 |
| Haloacid dehalogenase like hydrolase domain containing 2                  | HDHD2     | 697216 |
| HAUS augmin like complex subunit 8                                        | HAUS8     | 718874 |
| Hdc homolog, cell cycle regulator                                         | HECA      | 702628 |
| Heat shock factor binding protein 1                                       | HSBP1     | 714498 |
| Heat shock protein 90kda alpha (cytosolic), class A member 1              | HSP90AA1  | 708431 |
| Heat shock protein 90kda alpha family class B member 1                    | HSP90AB1  | 702293 |
| Heat shock protein 90kda beta family member 1                             | HSP90B1   | 699568 |
| Heat shock protein family A (Hsp70) member 8                              | HSPA8     | 707989 |
| Heat shock protein family B (small) member 11                             | HSPB11    | 714791 |
| Heat shock protein family B (small) member 6                              | HSPB6     | 710760 |
| Heat shock protein family D (Hsp60) member 1                              | HSPD1     | 698024 |
| Heat shock protein family H (Hsp110) member 1                             | HSPH1     | 721956 |
| Heat shock transcription factor 2                                         | HSF2      | 713938 |
| HECT domain containing E3 ubiquitin protein ligase 1                      | HECTD1    | 717177 |
| HECT domain containing E3 ubiquitin protein ligase 3                      | HECTD3    | 705051 |
| Helicase (DNA) B                                                          | HELB      | 717860 |
| Helicase, lymphoid-specific                                               | HELLS     | 701598 |
| Hematological and neurological expressed 1                                | HN1       | 664729 |
| Hematopoietic prostaglandin D synthase                                    | HPGDS     | 705227 |
| Hepatocyte growth factor-regulated tyrosine kinase substrate              | HGS       | 714385 |
| Hes family bhlh transcription factor 7                                    | HES7      | 721942 |
| Hes-related family bhlh transcription factor with YRPW motif 2            | HEY2      | 712988 |
| Heterogeneous nuclear ribonucleoprotein A/B                               | HNRNPAB   | 702509 |
| Heterogeneous nuclear ribonucleoprotein A1                                | HNRNPA1   | 702977 |
| Heterogeneous nuclear ribonucleoprotein A2/B1                             | HNRNPA2B1 | 701821 |
| Heterogeneous nuclear ribonucleoprotein C (C1/C2)                         | HNRNPC    | 706423 |
| Heterogeneous nuclear ribonucleoprotein D                                 | HNRNPD    | 694867 |
| Heterogeneous nuclear ribonucleoprotein D like                            | HNRNPDL   | 694603 |
| Heterogeneous nuclear ribonucleoprotein H2 (H')                           | HNRNPH2   | 703254 |
| Heterogeneous nuclear ribonucleoprotein L                                 | HNRNPL    | 694448 |
| Heterogeneous nuclear ribonucleoprotein L-like                            | HNRNPLL   | 710841 |
| Hexamethylene bis-acetamide inducible 2                                   | HEXIM2    | 716047 |
| High mobility group box 3                                                 | HMGB3     | 703598 |
| Hippocalcin                                                               | HPCA      | 710249 |
| HIRA interacting protein 3                                                | HIRIP3    | 708004 |
| Histidine triad nucleotide binding protein 1                              | HINT1     | 706083 |
| Histidyl-trna synthetase 2                                                | HARS2     | 697009 |
| Histone H4 transcription factor                                           | HINFP     | 703763 |

|                                                                                                                   |          |           |
|-------------------------------------------------------------------------------------------------------------------|----------|-----------|
| HMG-box transcription factor 1                                                                                    | HBP1     | 699237    |
| Holliday junction recognition protein                                                                             | HJURP    | 718180    |
| Homeodomain interacting protein kinase 1                                                                          | HIPK1    | 707856    |
| Homocysteine-inducible, endoplasmic reticulum stress-inducible, ubiquitin-like domain member 1                    | HERPUD1  | 703210    |
| Hyaluronan and proteoglycan link protein 3                                                                        | HAPLN3   | 698880    |
| Hyaluronoglucosaminidase 2                                                                                        | HYAL2    | 702484    |
| Hydroxyacyl-coa dehydrogenase/3-ketoacyl-coa thiolase /enoyl-coa hydratase (trifunctional protein), alpha subunit | HADHA    | 695975    |
| Hydroxysteroid (17-beta) dehydrogenase 10                                                                         | HSD17B10 | 700018    |
| Hydroxysteroid (17-beta) dehydrogenase 8                                                                          | HSD17B8  | 718119    |
| Hyperpolarization activated cyclic nucleotide gated potassium channel 3                                           | HCN3     | 717719    |
| Hypocretin (orexin) neuropeptide precursor                                                                        | HCRT     | 709564    |
| Hypoxia up-regulated 1                                                                                            | HYOU1    | 707715    |
| IKAROS family zinc finger 5                                                                                       | IKZF5    | 716950    |
| ILK associated serine/threonine phosphatase                                                                       | ILKAP    | 706334    |
| Immunoglobulin superfamily member 10                                                                              | IGSF10   | 709661    |
| IMP (inosine 5'-monophosphate) dehydrogenase 1                                                                    | IMPDH1   | 701039    |
| IMP3, U3 small nucleolar ribonucleoprotein                                                                        | IMP3     | 706202    |
| Importin 8                                                                                                        | IPO8     | 693514    |
| Increased sodium tolerance 1 homolog (yeast)                                                                      | IST1     | 707245    |
| Inhibin alpha                                                                                                     | INHA     | 574379    |
| Inhibitor of DNA binding 1, dominant negative helix-loop-helix protein                                            | ID1      | 713160    |
| Inhibitor of growth family member 2                                                                               | ING2     | 701839    |
| Inhibitor of growth family member 4                                                                               | ING4     | 722073    |
| Inhibitor of kappa light polypeptide gene enhancer in B-cells, kinase beta                                        | IKBKB    | 704683    |
| INO80 complex subunit C                                                                                           | INO80C   | 708819    |
| Inosine triphosphatase                                                                                            | ITPA     | 717257    |
| Inositol hexakisphosphate kinase 1                                                                                | IP6K1    | 705576    |
| Inositol monophosphatase domain containing 1                                                                      | IMPAD1   | 696893    |
| Inositol polyphosphate-1-phosphatase                                                                              | INPP1    | 703301    |
| Inositol(myo)-1(or 4)-monophosphatase 2                                                                           | IMPA2    | 704320    |
| Insulin like 3                                                                                                    | INSL3    | 100533192 |
| Insulin like growth factor binding protein 3                                                                      | IGFBP3   | 696868    |
| Insulin like growth factor binding protein 5                                                                      | IGFBP5   | 696339    |
| Insulin like growth factor binding protein 7                                                                      | IGFBP7   | 693564    |
| Integral membrane protein 2C                                                                                      | ITM2C    | 711245    |
| Integrator complex subunit 10                                                                                     | INTS10   | 705240    |
| Integrator complex subunit 12                                                                                     | INTS12   | 694344    |
| Integrator complex subunit 2                                                                                      | INTS2    | 712351    |
| Integrator complex subunit 4                                                                                      | INTS4    | 699466    |
| Integrator complex subunit 8                                                                                      | INTS8    | 700255    |
| Integrin alpha FG-GAP repeat containing 1                                                                         | ITFG1    | 716435    |
| Integrin linked kinase                                                                                            | ILK      | 709944    |



|                                                             |           |        |
|-------------------------------------------------------------|-----------|--------|
| Integrin subunit alpha 4                                    | ITGA4     | 704745 |
| Integrin subunit beta 7                                     | ITGB7     | 699405 |
| Interferon induced protein with tetratricopeptide repeats 2 | IFIT2     | 695452 |
| Interferon induced, with helicase C domain 1                | IFIH1     | 702024 |
| Interferon regulatory factor 2                              | IRF2      | 694347 |
| Interferon, lambda receptor 1                               | IFNLR1    | 711625 |
| Interferon-related developmental regulator 2                | IFRD2     | 702959 |
| Interleukin 17 receptor A                                   | IL17RA    | 709005 |
| Interleukin 20 receptor subunit beta                        | IL20RB    | 716769 |
| Interleukin enhancer binding factor 3                       | ILF3      | 713427 |
| Intraflagellar transport 20                                 | IFT20     | 715773 |
| Intraflagellar transport 22                                 | IFT22     | 714551 |
| Intraflagellar transport 27                                 | IFT27     | 697032 |
| Intraflagellar transport 46                                 | IFT46     | 700582 |
| Intraflagellar transport 57                                 | IFT57     | 705088 |
| Intraflagellar transport 74                                 | IFT74     | 707561 |
| Intraflagellar transport 80                                 | IFT80     | 705146 |
| IQ motif and Sec7 domain 1                                  | IQSEC1    | 693922 |
| IQ motif containing B1                                      | IQCB1     | 715032 |
| IQ motif containing K                                       | IQCK      | 695417 |
| IQ motif containing with AAA domain 1                       | IQCA1     | 694173 |
| Iron-sulfur cluster assembly 2                              | ISCA2     | 700004 |
| Iron-sulfur cluster assembly enzyme                         | ISCU      | 705669 |
| Iroquois homeobox 6                                         | IRX6      | 698232 |
| Isocitrate dehydrogenase 3 (NAD+) alpha                     | IDH3A     | 677715 |
| Isocitrate dehydrogenase 3 (NAD+) gamma                     | IDH3G     | 698558 |
| Isoleucyl-trna synthetase                                   | IARS      | 677705 |
| IWS1 homolog (S. Cerevisiae)                                | IWS1      | 699205 |
| Izumo sperm-egg fusion 1                                    | IZUMO1    | 718234 |
| JNK1/MAPK8-associated membrane protein                      | JKAMP     | 702307 |
| Jumonji domain containing 1C                                | JMJD1C    | 697630 |
| Kallikrein related peptidase 8                              | KLK8      | 719488 |
| Karyopherin alpha 4 (importin alpha 3)                      | KPNA4     | 702486 |
| KDEL endoplasmic reticulum protein retention receptor 3     | KDELR3    | 700810 |
| KDEL motif containing 1                                     | KDELC1    | 702156 |
| Kelch domain containing 4                                   | KLHDC4    | 695768 |
| Kelch domain containing 9                                   | KLHDC9    | 719863 |
| Kelch like family member 3                                  | KLHL3     | 713123 |
| Kelch like family member 32                                 | KLHL32    | 709276 |
| Kelch like family member 5                                  | KLHL5     | 698740 |
| Kelch repeat and BTB (POZ) domain containing 4              | KBTBD4    | 711452 |
| Keratin associated protein 12-4                             | KRTAP12-4 | 712284 |
| Keratin associated protein 19-3                             | KRTAP19-3 | 703677 |
| KIAA0226-like ortholog                                      | KIAA0226L | 703875 |
| KIAA0907 ortholog                                           | KIAA0907  | 718005 |
| KIAA0922 ortholog                                           | KIAA0922  | 696761 |
| KIAA1024 ortholog                                           | KIAA1024  | 712078 |
| KIAA1033 ortholog                                           | KIAA1033  | 701501 |

|                                                                                          |           |           |
|------------------------------------------------------------------------------------------|-----------|-----------|
| KIAA1143 ortholog                                                                        | KIAA1143  | 714979    |
| KIAA1958 ortholog                                                                        | KIAA1958  | 707028    |
| KIAA2013 ortholog                                                                        | KIAA2013  | 722762    |
| Killer cell lectin-like receptor subfamily F, member 1                                   | KLRF1     | 574389    |
| Kin17 DNA and RNA binding protein                                                        | KIN       | 713634    |
| Kinase D-interacting substrate 220kda                                                    | KIDINS220 | 693522    |
| Kinesin family member 2C                                                                 | KIF2C     | 705381    |
| Kinesin family member C3                                                                 | KIFC3     | 705951    |
| Kinesin heavy chain member 2A                                                            | KIF2A     | 696561    |
| Kinesin light chain 4                                                                    | KLC4      | 698356    |
| Kininogen 1                                                                              | KNG1      | 707466    |
| Kizuna centrosomal protein                                                               | KIZ       | 700808    |
| KN motif and ankyrin repeat domains 1                                                    | KANK1     | 697569    |
| Kruppel-like factor 10                                                                   | KLF10     | 693458    |
| Kruppel-like factor 11                                                                   | KLF11     | 702323    |
| Kxd1 motif containing 1                                                                  | KXD1      | 720235    |
| L-2-hydroxyglutarate dehydrogenase                                                       | L2HGDH    | 705721    |
| La ribonucleoprotein domain family member 7                                              | LARP7     | 703731    |
| Lactate dehydrogenase B                                                                  | LDHB      | 706110    |
| Lamin B receptor                                                                         | LBR       | 700801    |
| Late cornified envelope 4A                                                               | LCE4A     | 100423936 |
| Late endosomal/lysosomal adaptor, MAPK and MTOR activator 1                              | LAMTOR1   | 718249    |
| Late endosomal/lysosomal adaptor, MAPK and MTOR activator 3                              | LAMTOR3   | 709133    |
| Latexin                                                                                  | LXN       | 703996    |
| LCK proto-oncogene, Src family tyrosine kinase                                           | LCK       | 717704    |
| LDL receptor related protein 1                                                           | LRP1      | 710965    |
| Lectin, galactoside-binding, soluble, 14                                                 | LGALS14   | 698227    |
| Lectin, mannose-binding, 1                                                               | LMAN1     | 697449    |
| Leucine rich repeat and coiled-coil centrosomal protein 1                                | LRRCC1    | 707964    |
| Leucine rich repeat containing 14                                                        | LRRC14    | 703587    |
| Leucine rich repeat containing 20                                                        | LRRC20    | 710594    |
| Leucine rich repeat containing 40                                                        | LRRC40    | 702565    |
| Leucine rich repeat containing 42                                                        | LRRC42    | 714839    |
| Leucine rich repeat protein 1                                                            | LRR1      | 706658    |
| Leucine zipper, down-regulated in cancer 1                                               | LDOC1     | 696902    |
| Leucine zipper, down-regulated in cancer 1-like                                          | LDOC1L    | 712760    |
| Leucine-rich repeat containing 8 family member D                                         | LRRC8D    | 100423128 |
| Leucine-rich repeat LGI family member 4                                                  | LGI4      | 718426    |
| Leucine-rich repeats and WD repeat domain containing 1                                   | LRWD1     | 715187    |
| Leukocyte immunoglobulin-like receptor, subfamily B (with TM and ITIM domains), member 1 | LILRB1    | 692340    |
| Leukocyte-associated immunoglobulin-like receptor 1                                      | LAIR1     | 695533    |
| Leupaxin                                                                                 | LPXN      | 702033    |
| Ligand dependent nuclear receptor interacting factor 1                                   | LRIF1     | 702445    |
| Ligase III, DNA, ATP-dependent                                                           | LIG3      | 715181    |
| LIM domain containing 2                                                                  | LIMD2     | 717889    |
| Limb bud and heart development                                                           | LBH       | 704749    |

|                                                                                         |          |           |
|-----------------------------------------------------------------------------------------|----------|-----------|
| Lin-9 DREAM muvb core complex component                                                 | LIN9     | 699056    |
| Lipase A, lysosomal acid, cholesterol esterase                                          | LIPA     | 695240    |
| Lipid droplet associated hydrolase                                                      | LDAH     | 717510    |
| Lipocalin 1                                                                             | LCN1     | 711974    |
| Lipocalin 6                                                                             | LCN6     | 574148    |
| Lipoma HMGIC fusion partner-like 4                                                      | LHFPL4   | 700973    |
| LSM10, U7 small nuclear RNA associated                                                  | LSM10    | 713277    |
| LSM14A mrna processing body assembly factor                                             | LSM14A   | 705085    |
| LSM6 homolog, U6 small nuclear RNA and mrna degradation associated                      | LSM6     | 703226    |
| LUC7-like 3 pre-mrna splicing factor                                                    | LUC7L3   | 703662    |
| Lymphocyte antigen 6 complex, locus G6C                                                 | LY6G6C   | 716220    |
| Lymphoid enhancer-binding factor 1                                                      | LEF1     | 695776    |
| Lymphotoxin alpha                                                                       | LTA      | 715425    |
| Lysine (K)-specific demethylase 1A                                                      | KDM1A    | 718609    |
| Lysine (K)-specific methyltransferase 5B                                                | KMT5B    | 710481    |
| Lysine-rich nucleolar protein 1                                                         | KNOP1    | 695144    |
| Lysophosphatidic acid receptor 6                                                        | LPAR6    | 705081    |
| Lysosomal protein transmembrane 4 alpha                                                 | LAPTM4A  | 701298    |
| Lysyl oxidase like 3                                                                    | LOXL3    | 709834    |
| Lysyl-trna synthetase                                                                   | KARS     | 714516    |
| MACRO domain containing 1                                                               | MACROD1  | 717961    |
| Macrophage erythroblast attacher                                                        | MAEA     | 702015    |
| MAD2L1 binding protein                                                                  | MAD2L1BP | 701099    |
| MAGE family member D1                                                                   | MAGED1   | 696658    |
| MAGE family member F1                                                                   | MAGEF1   | 701676    |
| MAGE family member H1                                                                   | MAGEH1   | 703812    |
| Major facilitator superfamily domain containing 5                                       | MFSD5    | 702021    |
| Major histocompatibility complex, class II, DM beta                                     | MAMU-DMB | 100429856 |
| Malate dehydrogenase 1                                                                  | MDH1     | 694703    |
| Male-specific lethal 3 homolog (Drosophila)                                             | MSL3     | 720836    |
| Malonyl-coa-acyl carrier protein transacylase                                           | MCAT     | 711556    |
| Mannose phosphate isomerase                                                             | MPI      | 722129    |
| Mannosyl (alpha-1,3-)-glycoprotein beta-1,4-N-acetylglucosaminyl transferase, isozyme B | MGAT4B   | 705006    |
| Mannosyl (alpha-1,6-)-glycoprotein beta-1,2-N-acetylglucosaminyl transferase            | MGAT2    | 706426    |
| Mannosyl-oligosaccharide glucosidase                                                    | MOGS     | 708913    |
| MANSC domain containing 1                                                               | MANSC1   | 696667    |
| MARCKS-like 1                                                                           | MARCKSL1 | 100428616 |
| Mastermind like transcriptional coactivator 1                                           | MAML1    | 715047    |
| Matrin 3                                                                                | MATR3    | 100568448 |
| Mckusick-Kaufman syndrome                                                               | MKKS     | 718547    |
| Mdm1 nuclear protein                                                                    | MDM1     | 718062    |
| MDM2 binding protein                                                                    | MTBP     | 703121    |
| Mediator complex subunit 11                                                             | MED11    | 709561    |
| Mediator complex subunit 13-like                                                        | MED13L   | 713867    |
| Mediator complex subunit 19                                                             | MED19    | 704421    |

|                                                                                                                                               |         |           |
|-----------------------------------------------------------------------------------------------------------------------------------------------|---------|-----------|
| Mediator complex subunit 21                                                                                                                   | MED21   | 710699    |
| Mediator complex subunit 23                                                                                                                   | MED23   | 714629    |
| Mediator complex subunit 6                                                                                                                    | MED6    | 693320    |
| Mediator complex subunit 8                                                                                                                    | MED8    | 700676    |
| Meiosis 1 associated protein                                                                                                                  | M1AP    | 710210    |
| Meiosis specific nuclear structural 1                                                                                                         | MNS1    | 699377    |
| Membrane frizzled-related protein                                                                                                             | MFRP    | 704965    |
| Membrane protein, palmitoylated 1                                                                                                             | MPP1    | 702092    |
| Meningioma expressed antigen 5 (hyaluronidase)                                                                                                | MGEA5   | 712370    |
| Mesoderm development candidate 1                                                                                                              | MESDC1  | 713059    |
| Mesoderm induction early response 1, family member 2                                                                                          | MIER2   | 701450    |
| Mesoderm specific transcript                                                                                                                  | MEST    | 703327    |
| MET proto-oncogene, receptor tyrosine kinase                                                                                                  | MET     | 704562    |
| Metadherin                                                                                                                                    | MTDH    | 702410    |
| Metal response element binding transcription factor 2                                                                                         | MTF2    | 707104    |
| Metallo-beta-lactamase domain containing 2                                                                                                    | MBLAC2  | 695437    |
| Metastasis associated 1 family member 2                                                                                                       | MTA2    | 718772    |
| Metastasis associated 1 family member 3                                                                                                       | MTA3    | 712967    |
| Methionine sulfoxide reductase A                                                                                                              | MSRA    | 698628    |
| Methionine sulfoxide reductase B1                                                                                                             | MSRB1   | 693358    |
| Methionyl aminopeptidase 1                                                                                                                    | METAP1  | 710537    |
| Methionyl-trna synthetase                                                                                                                     | MARS    | 714744    |
| Methyl-cpg binding domain 4 DNA glycosylase                                                                                                   | MBD4    | 720557    |
| Methylcrotonoyl-coa carboxylase 1                                                                                                             | MCCC1   | 708258    |
| Methylenetetrahydrofolate dehydrogenase (NADP+ dependent) 1,<br>methenyltetrahydrofolate cyclohydrolase, formyltetrahydrofolate<br>synthetase | MTHFD1  | 707059    |
| Methylmalonic aciduria (cobalamin deficiency) cblb type                                                                                       | MMAB    | 708973    |
| Methyltransferase like 1                                                                                                                      | METTL1  | 715796    |
| Methyltransferase like 13                                                                                                                     | METTL13 | 704943    |
| Methyltransferase like 18                                                                                                                     | METTL18 | 701890    |
| Mevalonate kinase                                                                                                                             | MVK     | 707645    |
| Mex-3 RNA binding family member B                                                                                                             | MEX3B   | 713441    |
| Microfibrillar associated protein 1                                                                                                           | MFAP1   | 711111    |
| Microsomal glutathione S-transferase 2                                                                                                        | MGST2   | 697983    |
| Microtubule associated protein 1S                                                                                                             | MAP1S   | 719196    |
| Microtubule associated protein 4                                                                                                              | MAP4    | 100423616 |
| Microtubule associated protein RP/EB family member 1                                                                                          | MAPRE1  | 711404    |
| Midline 1                                                                                                                                     | MID1    | 709683    |
| MIF4G domain containing                                                                                                                       | MIF4GD  | 706005    |
| Minichromosome maintenance complex component 3                                                                                                | MCM3    | 708320    |
| Minichromosome maintenance complex component 3 associated<br>protein                                                                          | MCM3AP  | 721810    |
| Minichromosome maintenance complex component 5                                                                                                | MCM5    | 717548    |
| Mitochondrial assembly of ribosomal large subunit 1                                                                                           | MALSU1  | 704884    |
| Mitochondrial carrier 1                                                                                                                       | MTCH1   | 719313    |
| Mitochondrial E3 ubiquitin protein ligase 1                                                                                                   | MUL1    | 705429    |
| Mitochondrial fission regulator 1                                                                                                             | MTFR1   | 711143    |

|                                                             |          |           |
|-------------------------------------------------------------|----------|-----------|
| Mitochondrial fission regulator 1-like                      | MTFR1L   | 713213    |
| Mitochondrial genome maintenance exonuclease 1              | MGME1    | 696467    |
| Mitochondrial intermediate peptidase                        | MIPEP    | 707131    |
| Mitochondrial poly(A) polymerase                            | MTPAP    | 694491    |
| Mitochondrial pyruvate carrier 1                            | MPC1     | 716864    |
| Mitochondrial ribosomal protein L11                         | MRPL11   | 714094    |
| Mitochondrial ribosomal protein L13                         | MRPL13   | 702994    |
| Mitochondrial ribosomal protein L16                         | MRPL16   | 698831    |
| Mitochondrial ribosomal protein L19                         | MRPL19   | 711081    |
| Mitochondrial ribosomal protein L20                         | MRPL20   | 701533    |
| Mitochondrial ribosomal protein L22                         | MRPL22   | 714920    |
| Mitochondrial ribosomal protein L24                         | MRPL24   | 718640    |
| Mitochondrial ribosomal protein L39                         | MRPL39   | 708631    |
| Mitochondrial ribosomal protein L41                         | MRPL41   | 702768    |
| Mitochondrial ribosomal protein L42                         | MRPL42   | 715676    |
| Mitochondrial ribosomal protein L46                         | MRPL46   | 697872    |
| Mitochondrial ribosomal protein L50                         | MRPL50   | 713923    |
| Mitochondrial ribosomal protein L51                         | MRPL51   | 713036    |
| Mitochondrial ribosomal protein L55                         | MRPL55   | 695962    |
| Mitochondrial ribosomal protein S11                         | MRPS11   | 697743    |
| Mitochondrial ribosomal protein S17                         | MRPS17   | 703678    |
| Mitochondrial ribosomal protein S21                         | MRPS21   | 706805    |
| Mitochondrial ribosomal protein S22                         | MRPS22   | 715845    |
| Mitochondrial ribosomal protein S33                         | MRPS33   | 693681    |
| Mitochondrial ribosomal protein S6                          | MRPS6    | 106997264 |
| Mitochondrial transcription termination factor 2            | MTERF2   | 703925    |
| Mitochondrial transcription termination factor 3            | MTERF3   | 701366    |
| Mitochondrial translational initiation factor 2             | MTIF2    | 717042    |
| Mitochondrial trna translation optimization 1               | MTO1     | 717688    |
| Mitogen-activated protein kinase 1                          | MAPK1    | 698569    |
| Mitogen-activated protein kinase 7                          | MAPK7    | 702837    |
| Mitogen-activated protein kinase associated protein 1       | MAPKAP1  | 702599    |
| Mitogen-activated protein kinase kinase 1                   | MAP2K1   | 710415    |
| Mitogen-activated protein kinase kinase 4                   | MAP2K4   | 718155    |
| Mitogen-activated protein kinase kinase 5                   | MAP2K5   | 711672    |
| Mitogen-activated protein kinase kinase kinase 14           | MAP3K14  | 716258    |
| Mitogen-activated protein kinase kinase kinase 3            | MAP3K3   | 717866    |
| Mitogen-activated protein kinase kinase kinase 4            | MAP3K4   | 710360    |
| Mitogen-activated protein kinase kinase kinase 6            | MAP3K6   | 715911    |
| Mitogen-activated protein kinase kinase kinase kinase 1     | MAP4K1   | 694259    |
| Mitogen-activated protein kinase kinase kinase kinase 5     | MAP4K5   | 706204    |
| Mitogen-activated protein kinase-activated protein kinase 2 | MAPKAPK2 | 695044    |
| Mitogen-activated protein kinase-activated protein kinase 5 | MAPKAPK5 | 713521    |
| Mitotic spindle organizing protein 2B                       | MZT2B    | 701787    |
| MNAT CDK-activating kinase assembly factor 1                | MNAT1    | 703905    |
| MON1 homolog B, secretory trafficking associated            | MON1B    | 715104    |
| Monoamine oxidase B                                         | MAOB     | 708468    |
| Monocyte to macrophage differentiation-associated           | MMD      | 706723    |

|                                                                |          |           |
|----------------------------------------------------------------|----------|-----------|
| MORC family CW-type zinc finger 4                              | MORC4    | 701136    |
| Morf4 family associated protein 1-like 1                       | MRFAP1L1 | 710411    |
| MORN repeat containing 2                                       | MORN2    | 106992912 |
| Mortality factor 4 like 1                                      | MORF4L1  | 711357    |
| Motilin                                                        | MLN      | 574099    |
| M-phase phosphoprotein 6                                       | MPHOSPH6 | 714335    |
| M-phase specific PLK1 interacting protein                      | MPLKIP   | 703092    |
| MRT4 homolog, ribosome maturation factor                       | MRT04    | 702926    |
| Msh homeobox 2                                                 | MSX2     | 694227    |
| Muscleblind like splicing regulator 1                          | MBNL1    | 708735    |
| Mutl homolog 1                                                 | MLH1     | 698782    |
| Muty DNA glycosylase                                           | MUTYH    | 705651    |
| Myb/SANT-like DNA-binding domain containing 2                  | MSANTD2  | 712347    |
| MYC associated factor X                                        | MAX      | 708228    |
| Myelin protein zero-like 2                                     | MPZL2    | 699330    |
| Myeloid cell leukemia 1                                        | MCL1     | 707539    |
| Myeloid/lymphoid or mixed-lineage leukemia; translocated to, 6 | MLLT6    | 694045    |
| Myoferlin                                                      | MYOF     | 700922    |
| Myoneurin                                                      | MYNN     | 698094    |
| Myosin IF                                                      | MYO1F    | 712101    |
| Myosin light chain 4                                           | MYL4     | 717354    |
| Myosin, light chain 12A, regulatory, non-sarcomeric            | MYL12A   | 695077    |
| Myotrophin                                                     | MTPN     | 708941    |
| Myotubularin 1                                                 | MTM1     | 703131    |
| Myotubularin related protein 2                                 | MTMR2    | 699703    |
| Myotubularin related protein 4                                 | MTMR4    | 714621    |
| Myotubularin related protein 6                                 | MTMR6    | 709118    |
| Myotubularin related protein 8                                 | MTMR8    | 708037    |
| Myristoylated alanine-rich protein kinase C substrate          | MARCKS   | 694077    |
| MYST/Esa1-associated factor 6                                  | MEAF6    | 713666    |
| N(alpha)-acetyltransferase 35, natc auxiliary subunit          | NAA35    | 710122    |
| N(alpha)-acetyltransferase 50, nate catalytic subunit          | NAA50    | 709764    |
| N(alpha)-acetyltransferase 60, natf catalytic subunit          | NAA60    | 703207    |
| N-acetylglucosamine kinase                                     | NAGK     | 703976    |
| N-acetylglucosamine-1-phosphate transferase, gamma subunit     | GNPTG    | 722441    |
| NAD(P) dependent steroid dehydrogenase-like                    | NSDHL    | 693333    |
| NAD(P)H dehydrogenase, quinone 2                               | NQO2     | 707675    |
| NADH:ubiquinone oxidoreductase complex assembly factor 1       | NDUFAF1  | 710275    |
| NADH:ubiquinone oxidoreductase complex assembly factor 2       | NDUFAF2  | 693441    |
| NADH:ubiquinone oxidoreductase complex assembly factor 4       | NDUFAF4  | 705102    |
| NADH:ubiquinone oxidoreductase complex assembly factor 6       | NDUFAF6  | 700515    |
| NADH:ubiquinone oxidoreductase complex assembly factor 7       | NDUFAF7  | 709473    |
| NADH:ubiquinone oxidoreductase core subunit S2                 | NDUFS2   | 719935    |
| NADH:ubiquinone oxidoreductase core subunit S3                 | NDUFS3   | 713040    |
| NADH:ubiquinone oxidoreductase subunit A1                      | NDUFA1   | 694635    |
| NADH:ubiquinone oxidoreductase subunit A12                     | NDUFA12  | 711970    |
| NADH:ubiquinone oxidoreductase subunit A8                      | NDUFA8   | 698706    |
| NADH:ubiquinone oxidoreductase subunit AB1                     | NDUFAB1  | 700718    |

|                                                                   |         |           |
|-------------------------------------------------------------------|---------|-----------|
| NADH:ubiquinone oxidoreductase subunit B10                        | NDUFB10 | 693482    |
| NADH:ubiquinone oxidoreductase subunit B2                         | NDUFB2  | 693431    |
| NADH:ubiquinone oxidoreductase subunit B4                         | NDUFB4  | 713428    |
| NADH:ubiquinone oxidoreductase subunit B8                         | NDUFB8  | 710521    |
| NADH:ubiquinone oxidoreductase subunit B9                         | NDUFB9  | 711387    |
| NADH:ubiquinone oxidoreductase subunit C1                         | NDUFC1  | 697242    |
| NADH:ubiquinone oxidoreductase subunit S4                         | NDUFS4  | 704137    |
| Nascent polypeptide-associated complex alpha subunit              | NACA    | 713416    |
| Natural killer cell granule protein 7                             | NKG7    | 719624    |
| NCK adaptor protein 2                                             | NCK2    | 713287    |
| NCK interacting protein with SH3 domain                           | NCKIPSD | 709410    |
| NCK-associated protein 1                                          | NCKAP1  | 711124    |
| NECAP endocytosis associated 2                                    | NECAP2  | 698687    |
| NEDD8 activating enzyme E1 subunit 1                              | NAE1    | 696429    |
| Negative elongation factor complex member C/D                     | NELFCD  | 696053    |
| Negative elongation factor complex member E                       | NELFE   | 716913    |
| Negative regulator of ubiquitin-like proteins 1                   | NUB1    | 715231    |
| Nerve growth factor receptor (TNFRSF16) associated protein 1      | NGFRAP1 | 100428976 |
| Neural precursor cell expressed, developmentally down-regulated 1 | NEDD1   | 713673    |
| Neurexophilin and PC-esterase domain family member 3              | NXPE3   | 702612    |
| Neurologin 2                                                      | NLGN2   | 574368    |
| Neuronal pentraxin I                                              | NPTX1   | 718259    |
| Neuron-derived neurotrophic factor                                | NDNF    | 706304    |
| Neuropeptide FF-amide peptide precursor                           | NPFF    | 703412    |
| Neuropilin 1                                                      | NRP1    | 697755    |
| Neuroplastin                                                      | NPTN    | 699627    |
| NGFI-A binding protein 1                                          | NAB1    | 693274    |
| NGFI-A binding protein 2 (EGR1 binding protein 2)                 | NAB2    | 714209    |
| N-glycanase 1                                                     | NGLY1   | 700842    |
| NHL repeat containing 2                                           | NHLRC2  | 698009    |
| NHP2 ribonucleoprotein                                            | NHP2    | 701950    |
| Nicotinamide nucleotide transhydrogenase                          | NNT     | 701110    |
| Niemann-Pick disease, type C2                                     | NPC2    | 699881    |
| NIMA-related kinase 1                                             | NEK1    | 694345    |
| NIN1/RPN12 binding protein 1 homolog                              | NOB1    | 705344    |
| Ninein                                                            | NIN     | 709532    |
| Ninjurin 1                                                        | NINJ1   | 717218    |
| Nitric oxide associated 1                                         | NOA1    | 693437    |
| NMD3 ribosome export adaptor                                      | NMD3    | 701677    |
| NME/NM23 nucleoside diphosphate kinase 2                          | NME2    | 100533960 |
| N-myc and STAT interactor                                         | NMI     | 694554    |
| Non-POU domain containing, octamer-binding                        | NONO    | 697263    |
| Non-SMC condensin II complex subunit D3                           | NCAPD3  | 700276    |
| Non-SMC condensin II complex subunit H2                           | NCAPH2  | 716120    |
| NOP16 nucleolar protein                                           | NOP16   | 696768    |
| NOP2/Sun RNA methyltransferase family member 5                    | NSUN5   | 716219    |
| NOP58 ribonucleoprotein                                           | NOP58   | 703859    |
| NOP9 nucleolar protein                                            | NOP9    | 715969    |

|                                                                      |         |        |
|----------------------------------------------------------------------|---------|--------|
| NPR2-like, GATOR1 complex subunit                                    | NPRL2   | 701924 |
| NRDE-2, necessary for RNA interference, domain containing            | NRDE2   | 695676 |
| NSA2, ribosome biogenesis homolog                                    | NSA2    | 704670 |
| NSE4 homolog A, SMC5-SMC6 complex component                          | NSMCE4A | 705375 |
| NSFL1 (p97) cofactor (p47)                                           | NSFL1C  | 715743 |
| N-terminal Xaa-Pro-Lys N-methyltransferase 1                         | NTMT1   | 716763 |
| Nth-like DNA glycosylase 1                                           | NTHL1   | 694848 |
| Nuclear casein kinase and cyclin-dependent kinase substrate 1        | NUCKS1  | 697298 |
| Nuclear envelope integral membrane protein 1                         | NEMP1   | 710700 |
| Nuclear factor of kappa light polypeptide gene enhancer in B-cells 1 | NFKB1   | 710324 |
| Nuclear factor, erythroid 2 like 1                                   | NFE2L1  | 695404 |
| Nuclear factor, erythroid 2 like 2                                   | NFE2L2  | 707606 |
| Nuclear fragile X mental retardation protein interacting protein 2   | NUFIP2  | 711330 |
| Nuclear receptor coactivator 4                                       | NCOA4   | 709509 |
| Nuclear receptor coactivator 6                                       | NCOA6   | 706903 |
| Nuclear receptor subfamily 1 group I member 2                        | NR1I2   | 574226 |
| Nuclear receptor subfamily 2 group F member 2                        | NR2F2   | 707483 |
| Nuclear RNA export factor 1                                          | NXF1    | 718420 |
| Nuclear RNA export factor 3                                          | NXF3    | 695351 |
| Nuclear transcription factor Y subunit gamma                         | NFYC    | 696290 |
| Nuclear transport factor 2-like export factor 1                      | NXT1    | 711846 |
| Nuclear transport factor 2-like export factor 2                      | NXT2    | 704593 |
| Nucleobindin 2                                                       | NUCB2   | 697084 |
| Nucleolar protein 10                                                 | NOL10   | 695849 |
| Nucleolar protein 8                                                  | NOL8    | 705799 |
| Nucleolar protein interacting with the FHA domain of MKI67           | NIFK    | 697198 |
| Nucleolin                                                            | NCL     | 720965 |
| Nucleophosmin/nucleoplasmin 3                                        | NPM3    | 712300 |
| Nucleoporin 107kda                                                   | NUP107  | 718214 |
| Nucleoporin 205kda                                                   | NUP205  | 708216 |
| Nucleoporin 35kda                                                    | NUP35   | 706497 |
| Nucleoporin 37kda                                                    | NUP37   | 697933 |
| Nucleoporin 50kda                                                    | NUP50   | 713282 |
| Nucleoporin 85kda                                                    | NUP85   | 705628 |
| Nucleoporin 88kda                                                    | NUP88   | 711734 |
| Nucleosome assembly protein 1-like 5                                 | NAP1L5  | 703223 |
| Nude neurodevelopment protein 1                                      | NDE1    | 717754 |
| Nudix hydrolase 1                                                    | NUDT1   | 713078 |
| Nudix hydrolase 13                                                   | NUDT13  | 707796 |
| Nudix hydrolase 22                                                   | NUDT22  | 717864 |
| Nudix hydrolase 5                                                    | NUDT5   | 694368 |
| O-6-methylguanine-DNA methyltransferase                              | MGMT    | 698134 |
| O-acyl-ADP-ribose deacylase 1                                        | OARD1   | 719685 |
| Oculocerebrorenal syndrome of Lowe                                   | OCRL    | 702345 |
| Olfactomedin 2                                                       | OLFM2   | 711336 |
| Olfactomedin like 2B                                                 | OLFML2B | 720062 |
| Olfactomedin like 3                                                  | OLFML3  | 707969 |
| Olfactory receptor, family 2, subfamily AG, member 2                 | OR2AG2  | 709556 |



|                                                                           |         |           |
|---------------------------------------------------------------------------|---------|-----------|
| Oligonucleotide/oligosaccharide-binding fold containing 1                 | OBFC1   | 714968    |
| Optic atrophy 3 (autosomal recessive, with chorea and spastic paraplegia) | OPA3    | 714806    |
| Oral-facial-digital syndrome 1                                            | OFD1    | 711677    |
| Origin recognition complex subunit 1                                      | ORC1    | 713271    |
| Origin recognition complex subunit 3                                      | ORC3    | 700773    |
| Origin recognition complex subunit 5                                      | ORC5    | 696683    |
| ORMDL sphingolipid biosynthesis regulator 2                               | ORMDL2  | 710296    |
| ORMDL sphingolipid biosynthesis regulator 3                               | ORMDL3  | 699154    |
| Ornithine aminotransferase                                                | OAT     | 693970    |
| Ornithine decarboxylase antizyme 1                                        | OAZ1    | 721477    |
| O-sialoglycoprotein endopeptidase                                         | OSGEP   | 702512    |
| Oxysterol binding protein                                                 | OSBP    | 699325    |
| Oxysterol binding protein like 8                                          | OSBPL8  | 693338    |
| P450 (cytochrome) oxidoreductase                                          | POR     | 715888    |
| PAN2 poly(A) specific ribonuclease subunit                                | PAN2    | 712478    |
| Pancreatic polypeptide                                                    | PPY     | 713988    |
| Pantothenate kinase 1                                                     | PANK1   | 696041    |
| Pantothenate kinase 4                                                     | PANK4   | 694804    |
| PAP associated domain containing 7                                        | PAPD7   | 713853    |
| Par-3 family cell polarity regulator                                      | PARD3   | 706472    |
| Paraoxonase 2                                                             | PON2    | 699107    |
| Paraspeckle component 1                                                   | PSPC1   | 705080    |
| Parkinson protein 7                                                       | PARK7   | 708377    |
| Paternally expressed 3                                                    | PEG3    | 707825    |
| PAX3 and PAX7 binding protein 1                                           | PAXBP1  | 700489    |
| PAXIP1 associated glutamate-rich protein 1                                | PAGR1   | 706839    |
| PC-esterase domain containing 1A                                          | PCED1A  | 716956    |
| PDZ domain containing 4                                                   | PDZD4   | 697387    |
| PDZ domain containing ring finger 3                                       | PDZRN3  | 709901    |
| Peptidase (mitochondrial processing) alpha                                | PMPCA   | 721742    |
| Peptide deformylase (mitochondrial)                                       | PDF     | 100427224 |
| Peptidoglycan recognition protein 1                                       | PGLYRP1 | 718480    |
| Peptidylprolyl isomerase domain and WD repeat containing 1                | PPWD1   | 696267    |
| Peptidylprolyl isomerase E (cyclophilin E)                                | PPIE    | 716340    |
| Peptidylprolyl isomerase G (cyclophilin G)                                | PPIG    | 706262    |
| Peptidylprolyl isomerase H (cyclophilin H)                                | PPIH    | 697669    |
| Peptidylprolyl isomerase like 3                                           | PPIL3   | 700456    |
| Periaxin                                                                  | PRX     | 702329    |
| Peroxiredoxin 2                                                           | PRDX2   | 716665    |
| Peroxiredoxin 3                                                           | PRDX3   | 702882    |
| Peroxiredoxin 4                                                           | PRDX4   | 697635    |
| Peroxiredoxin 6                                                           | PRDX6   | 706486    |
| Peroxisomal biogenesis factor 11 beta                                     | PEX11B  | 698184    |
| Peroxisomal membrane protein 2                                            | PXMP2   | 693648    |
| Peroxisome proliferator-activated receptor delta                          | PPARD   | 718861    |
| PHD finger protein 1                                                      | PHF1    | 718337    |
| PHD finger protein 2                                                      | PHF2    | 717585    |

|                                                                                                                                   |          |           |
|-----------------------------------------------------------------------------------------------------------------------------------|----------|-----------|
| PHD finger protein 23                                                                                                             | PHF23    | 714538    |
| PHD finger protein 6                                                                                                              | PHF6     | 707390    |
| PHD finger protein 7                                                                                                              | PHF7     | 697103    |
| Phenylalanyl-trna synthetase 2, mitochondrial                                                                                     | FARS2    | 710945    |
| Phosphatase, orphan 1                                                                                                             | PHOSPHO1 | 698959    |
| Phosphatase, orphan 2                                                                                                             | PHOSPHO2 | 100429656 |
| Phosphate cytidylyltransferase 1, choline, alpha                                                                                  | PCYT1A   | 722105    |
| Phosphatidylglycerophosphate synthase 1                                                                                           | PGS1     | 710125    |
| Phosphatidylinositol 3-kinase catalytic subunit type 3                                                                            | PIK3C3   | 693918    |
| Phosphatidylinositol 4-kinase, catalytic, alpha                                                                                   | PI4KA    | 698020    |
| Phosphatidylinositol 4-kinase, catalytic, beta                                                                                    | PI4KB    | 710104    |
| Phosphatidylinositol glycan anchor biosynthesis class A                                                                           | PIGA     | 712514    |
| Phosphatidylinositol glycan anchor biosynthesis class C                                                                           | PIGC     | 705657    |
| Phosphatidylinositol glycan anchor biosynthesis class F                                                                           | PIGF     | 714844    |
| Phosphatidylinositol glycan anchor biosynthesis class G                                                                           | PIGG     | 714088    |
| Phosphatidylinositol glycan anchor biosynthesis class H                                                                           | PIGH     | 710780    |
| Phosphatidylinositol glycan anchor biosynthesis class S                                                                           | PIGS     | 709115    |
| Phosphatidylinositol transfer protein beta                                                                                        | PITPNB   | 713414    |
| Phosphodiesterase 12                                                                                                              | PDE12    | 703552    |
| Phosphodiesterase 5A                                                                                                              | PDE5A    | 705592    |
| Phosphodiesterase 8A                                                                                                              | PDE8A    | 694750    |
| Phosphohistidine phosphatase 1                                                                                                    | PHPT1    | 721674    |
| Phosphoinositide-3-kinase regulatory subunit 4                                                                                    | PIK3R4   | 718012    |
| Phospholipase A2 group XVI                                                                                                        | PLA2G16  | 722178    |
| Phospholipase B domain containing 1                                                                                               | PLBD1    | 698939    |
| Phospholipase C delta 1                                                                                                           | PLCD1    | 696860    |
| Phospholipase D family member 3                                                                                                   | PLD3     | 701083    |
| Phospholipid phosphatase 2                                                                                                        | PLPP2    | 721004    |
| Phospholipid phosphatase 6                                                                                                        | PLPP6    | 695188    |
| Phosphopantothenoylcysteine decarboxylase                                                                                         | PPCDC    | 704015    |
| Phosphopantothenoylcysteine synthetase                                                                                            | PPCS     | 697064    |
| Phosphoribosyl pyrophosphate synthetase 1                                                                                         | PRPS1    | 702529    |
| Phosphoribosyl pyrophosphate synthetase-associated protein 1                                                                      | PRPSAP1  | 706625    |
| Phosphoribosylglycinamide formyltransferase, phosphoribosyl<br>glycinamide synthetase, phosphoribosylaminoimidazole<br>synthetase | GART     | 704926    |
| Phosphorylase kinase, alpha 2 (liver)                                                                                             | PHKA2    | 694376    |
| Phosphorylase, glycogen, liver                                                                                                    | PYGL     | 706853    |
| PIH1 domain containing 1                                                                                                          | PIH1D1   | 718787    |
| Pirin                                                                                                                             | PIR      | 720959    |
| Pituitary tumor-transforming 1                                                                                                    | PTTG1    | 696143    |
| Plakophilin 2                                                                                                                     | PKP2     | 100429376 |
| Plasminogen receptor, C-terminal lysine transmembrane protein                                                                     | PLGRKT   | 693286    |
| Plastin 3                                                                                                                         | PLS3     | 709055    |
| Platelet derived growth factor C                                                                                                  | PDGFC    | 700236    |
| Platelet derived growth factor D                                                                                                  | PDGFD    | 704310    |
| Platelet-derived growth factor beta polypeptide                                                                                   | PDGFB    | 703173    |
| Pleckstrin homology domain containing A1                                                                                          | PLEKHA1  | 705731    |

|                                                                     |         |           |
|---------------------------------------------------------------------|---------|-----------|
| Pleckstrin homology domain containing A3                            | PLEKHA3 | 703417    |
| Pleckstrin homology domain containing O2                            | PLEKHO2 | 712677    |
| Pleckstrin homology domain interacting protein                      | PHIP    | 716810    |
| Plexin B3                                                           | PLXNB3  | 696903    |
| Pogo transposable element with ZNF domain                           | POGZ    | 710634    |
| Poliovirus receptor-related 2 (herpesvirus entry mediator B)        | PVRL2   | 713229    |
| Poly(A) binding protein interacting protein 1                       | PAIP1   | 700869    |
| Poly(A) binding protein interacting protein 2                       | PAIP2   | 693317    |
| Poly(A) binding protein, cytoplasmic 1                              | PABPC1  | 705847    |
| Poly(A) binding protein, cytoplasmic 3                              | PABPC3  | 708617    |
| Poly(A) polymerase gamma                                            | PAPOLG  | 717781    |
| Poly(ADP-ribose) glycohydrolase                                     | PARG    | 709432    |
| Poly(ADP-ribose) polymerase 2                                       | PARP2   | 701955    |
| Poly(rc) binding protein 2                                          | PCBP2   | 703175    |
| Polycomb group ring finger 2                                        | PCGF2   | 694187    |
| Polycomb group ring finger 6                                        | PCGF6   | 714508    |
| Polyglutamine binding protein 1                                     | PQBP1   | 711678    |
| Polyhomeotic homolog 2 (Drosophila)                                 | PHC2    | 710201    |
| Polymerase (DNA directed), beta                                     | POLB    | 704801    |
| Polymerase (DNA directed), gamma                                    | POLG    | 699750    |
| Polymerase (RNA) I polypeptide C                                    | POLR1C  | 700727    |
| Polymerase (RNA) II (DNA directed) polypeptide C, 33kda             | POLR2C  | 704555    |
| Polymerase (RNA) II (DNA directed) polypeptide F                    | POLR2F  | 699566    |
| Polymerase (RNA) II (DNA directed) polypeptide G                    | POLR2G  | 718548    |
| Polymerase (RNA) II (DNA directed) polypeptide H                    | POLR2H  | 100429040 |
| Polymerase (RNA) II (DNA directed) polypeptide I, 14.5kda           | POLR2I  | 712412    |
| Polymerase (RNA) III (DNA directed) polypeptide B                   | POLR3B  | 702711    |
| Polymerase (RNA) III (DNA directed) polypeptide C (62kd)            | POLR3C  | 696943    |
| Polypeptide N-acetylgalactosaminyltransferase 1                     | GALNT1  | 708930    |
| Polysaccharide biosynthesis domain containing 1                     | PBDC1   | 705125    |
| POP5 homolog, ribonuclease P/MRP subunit                            | POP5    | 697559    |
| Post-GPI attachment to proteins 3                                   | PGAP3   | 697699    |
| Potassium channel tetramerization domain containing 2               | KCTD2   | 700474    |
| Potassium channel tetramerization domain containing 6               | KCTD6   | 701810    |
| Potassium channel tetramerization domain containing 9               | KCTD9   | 711515    |
| Potassium channel, voltage gated eag related subfamily H, member 3  | KCNH3   | 710838    |
| Potassium channel, voltage gated Shaw related subfamily C, member 2 | KCNC2   | 100430904 |
| Potassium voltage-gated channel, modifier subfamily S, member 1     | KCNS1   | 711715    |
| PR domain containing 1, with ZNF domain                             | PRDM1   | 696757    |
| PR domain containing 2, with ZNF domain                             | PRDM2   | 716295    |
| PR domain containing 4                                              | PRDM4   | 704529    |
| Praja ring finger 1, E3 ubiquitin protein ligase                    | PJA1    | 695038    |
| Pre-B-cell leukemia homeobox 4                                      | PBX4    | 106994672 |
| Prefoldin subunit 2                                                 | PFDN2   | 719886    |
| Prefoldin subunit 5                                                 | PFDN5   | 702355    |
| Pre-mrna processing factor 40 homolog A                             | PRPF40A | 696668    |

|                                                                        |         |           |
|------------------------------------------------------------------------|---------|-----------|
| Presenilin 1                                                           | PSEN1   | 696274    |
| Presenilin enhancer gamma secretase subunit                            | PSENE1  | 100429008 |
| Presequence translocase-associated motor 16 homolog<br>(S. Cerevisiae) | PAM16   | 704987    |
| Prion protein                                                          | PRNP    | 717859    |
| Progesterone receptor membrane component 1                             | PGRMC1  | 711792    |
| Programmed cell death 2                                                | PDCD2   | 696380    |
| Programmed cell death 2-like                                           | PDCD2L  | 705688    |
| Programmed cell death 5                                                | PDCD5   | 702277    |
| Programmed cell death 6                                                | PDCD6   | 723043    |
| Programmed cell death 7                                                | PDCD7   | 708758    |
| Prohibitin                                                             | PHB     | 699334    |
| Prohibitin 2                                                           | PHB2    | 714693    |
| Proliferating cell nuclear antigen                                     | PCNA    | 718006    |
| Proline and serine rich 1                                              | PROSER1 | 696606    |
| Proline rich 15                                                        | PRR15   | 696869    |
| Proline rich 3                                                         | PRR3    | 711699    |
| Proline rich Gla (G-carboxyglutamic acid) 1                            | PRRG1   | 696938    |
| Proline/serine-rich coiled-coil 1                                      | PSRC1   | 698060    |
| Proline-rich coiled-coil 1                                             | PRRC1   | 704248    |
| Prolyl 4-hydroxylase, alpha polypeptide II                             | P4HA2   | 707157    |
| Prolylcarboxypeptidase                                                 | PRCP    | 701305    |
| Propionyl-coa carboxylase beta subunit                                 | PCCB    | 716964    |
| Prostaglandin D2 receptor 2                                            | PTGDR2  | 695853    |
| Prostaglandin D2 synthase                                              | PTGDS   | 707990    |
| Proteasomal ATPase associated factor 1                                 | PAAF1   | 718755    |
| Proteasome (prosome, macropain) assembly chaperone 1                   | PSMG1   | 715758    |
| Proteasome (prosome, macropain) assembly chaperone 2                   | PSMG2   | 717110    |
| Proteasome (prosome, macropain) assembly chaperone 3                   | PSMG3   | 697590    |
| Proteasome 26S subunit, ATPase 4                                       | PSMC4   | 699847    |
| Proteasome 26S subunit, non-ATPase 1                                   | PSMD1   | 711724    |
| Proteasome 26S subunit, non-ATPase 12                                  | PSMD12  | 718756    |
| Proteasome 26S subunit, non-ATPase 6                                   | PSMD6   | 698601    |
| Proteasome 26S subunit, non-ATPase 7                                   | PSMD7   | 705581    |
| Proteasome activator subunit 2                                         | PSME2   | 715288    |
| Proteasome subunit alpha 2                                             | PSMA2   | 701683    |
| Proteasome subunit alpha 3                                             | PSMA3   | 700251    |
| Proteasome subunit alpha 4                                             | PSMA4   | 710417    |
| Proteasome subunit alpha 5                                             | PSMA5   | 698435    |
| Proteasome subunit alpha 6                                             | PSMA6   | 695113    |
| Proteasome subunit beta 10                                             | PSMB10  | 701088    |
| Proteasome subunit beta 2                                              | PSMB2   | 712193    |
| Proteasome subunit beta 4                                              | PSMB4   | 710734    |
| Proteasome subunit beta 7                                              | PSMB7   | 694567    |
| Proteasome subunit beta 9                                              | PSMB9   | 716980    |
| Protection of telomeres 1                                              | POT1    | 696751    |
| Protein disulfide isomerase family A member 5                          | PDIA5   | 715226    |
| Protein kinase, AMP-activated, alpha 2 catalytic subunit               | PRKAA2  | 717703    |

|                                                                              |           |           |
|------------------------------------------------------------------------------|-----------|-----------|
| Protein kinase, AMP-activated, beta 1 non-catalytic subunit                  | PRKAB1    | 695737    |
| Protein kinase, interferon-inducible double stranded RNA dependent activator | PRKRA     | 703063    |
| Protein odr-4 homolog                                                        | C1H1orf27 | 713801    |
| Protein O-glucosyltransferase 1                                              | POGLUT1   | 712357    |
| Protein phosphatase 1 regulatory subunit 12C                                 | PPP1R12C  | 698538    |
| Protein phosphatase 1 regulatory subunit 15A                                 | PPP1R15A  | 718350    |
| Protein phosphatase 1 regulatory subunit 35                                  | PPP1R35   | 712067    |
| Protein phosphatase 2 regulatory subunit B', gamma                           | PPP2R5C   | 718894    |
| Protein phosphatase 2 regulatory subunit B'', gamma                          | PPP2R3C   | 694616    |
| Protein phosphatase 2, catalytic subunit, beta isozyme                       | PPP2CB    | 695118    |
| Protein phosphatase 3, catalytic subunit, gamma isozyme                      | PPP3CC    | 708233    |
| Protein phosphatase, Mg <sup>2+</sup> /Mn <sup>2+</sup> dependent 1A         | PPM1A     | 702987    |
| Protein phosphatase, Mg <sup>2+</sup> /Mn <sup>2+</sup> dependent 1B         | PPM1B     | 713918    |
| Protein phosphatase, Mg <sup>2+</sup> /Mn <sup>2+</sup> dependent 1F         | PPM1F     | 698441    |
| Protein phosphatase, Mg <sup>2+</sup> /Mn <sup>2+</sup> dependent 1G         | PPM1G     | 700695    |
| Protein tyrosine phosphatase type IVA, member 2                              | PTP4A2    | 706489    |
| Protein tyrosine phosphatase, non-receptor type 1                            | PTPN1     | 702016    |
| Protein tyrosine phosphatase, non-receptor type 12                           | PTPN12    | 721538    |
| Protein tyrosine phosphatase, non-receptor type 4 (megakaryocyte)            | PTPN4     | 695516    |
| Protein-L-isoaspartate (D-aspartate) O-methyltransferase                     | PCMT1     | 695893    |
| Protoporphyrinogen oxidase                                                   | PPOX      | 719910    |
| Pumilio RNA binding family member 1                                          | PUM1      | 704848    |
| Pumilio RNA binding family member 2                                          | PUM2      | 701782    |
| PWP2 periodic tryptophan protein homolog (yeast)                             | PWP2      | 722216    |
| Pyruvate dehydrogenase (lipoamide) alpha 1                                   | PDHA1     | 100423992 |
| Pyruvate dehydrogenase (lipoamide) beta                                      | PDHB      | 574227    |
| Rab geranylgeranyltransferase, beta subunit                                  | RABGGTB   | 705421    |
| RAB, member of RAS oncogene family-like 2B                                   | RABL2B    | 716615    |
| RAB18, member RAS oncogene family                                            | RAB18     | 708843    |
| RAB23, member RAS oncogene family                                            | RAB23     | 712860    |
| RAB30, member RAS oncogene family                                            | RAB30     | 701550    |
| RAB3A interacting protein                                                    | RAB3IP    | 717215    |
| RAB4A, member RAS oncogene family                                            | RAB4A     | 694288    |
| RAB5A, member RAS oncogene family                                            | RAB5A     | 697712    |
| RAB5B, member RAS oncogene family                                            | RAB5B     | 708347    |
| RAB6A, member RAS oncogene family                                            | RAB6A     | 718717    |
| Rac gtpase activating protein 1                                              | RACGAP1   | 711887    |
| RAD17 checkpoint clamp loader component                                      | RAD17     | 700116    |
| RAD50 interactor 1                                                           | RINT1     | 698414    |
| RAD51 associated protein 1                                                   | RAD51AP1  | 710918    |
| RAD51 paralog C                                                              | RAD51C    | 714828    |
| RAD52 motif containing 1                                                     | RDM1      | 716624    |
| RAD9 checkpoint clamp component A                                            | RAD9A     | 712345    |
| RAD9-HUS1-RAD1 interacting nuclear orphan 1                                  | RHNO1     | 709008    |
| Raf-1 proto-oncogene, serine/threonine kinase                                | RAF1      | 694725    |
| Raftlin, lipid raft linker 1                                                 | RFTN1     | 695142    |

|                                                            |          |        |
|------------------------------------------------------------|----------|--------|
| Ral GEF with PH domain and SH3 binding motif 1             | RALGPS1  | 708253 |
| Ral gtpase activating protein, alpha subunit 1 (catalytic) | RALGAPA1 | 695674 |
| RALBP1 associated Eps domain containing 2                  | REPS2    | 721024 |
| RALY heterogeneous nuclear ribonucleoprotein               | RALY     | 713317 |
| RAN binding protein 10                                     | RANBP10  | 700911 |
| RAN binding protein 6                                      | RANBP6   | 715799 |
| RAN guanine nucleotide release factor                      | RANGRF   | 717206 |
| Rap guanine nucleotide exchange factor 2                   | RAPGEF2  | 704717 |
| RAS and EF-hand domain containing                          | RASEF    | 708296 |
| Ras association (ralgds/AF-6) domain family member 4       | RASSF4   | 706096 |
| Ras homolog family member C                                | RHOC     | 706034 |
| Ras homolog family member D                                | RHOD     | 712969 |
| Ras homolog family member J                                | RHOJ     | 705603 |
| RAS p21 protein activator (gtpase activating protein) 1    | RASA1    | 694085 |
| RAS protein activator like 2                               | RASAL2   | 718958 |
| RAS-like family 10 member A                                | RASL10A  | 714587 |
| Ras-like without CAAX 1                                    | RIT1     | 717985 |
| Ras-related GTP binding C                                  | RRAGC    | 715549 |
| RB1 inducible coiled-coil 1                                | RB1CC1   | 710330 |
| Rearranged L-myc fusion                                    | RLF      | 693503 |
| Receptor (G protein-coupled) activity modifying protein 1  | RAMP1    | 574329 |
| Receptor interacting serine/threonine kinase 4             | RIPK4    | 715077 |
| Recq helicase-like                                         | RECQL    | 705871 |
| Regucalcin                                                 | RGN      | 705733 |
| Regulation of nuclear pre-mrna domain containing 1A        | RPRD1A   | 709217 |
| Regulator of G-protein signaling 7                         | RGS7     | 707747 |
| Regulator of microtubule dynamics 1                        | RMDN1    | 694237 |
| Renin                                                      | REN      | 574299 |
| Replication protein A3                                     | RPA3     | 696248 |
| Replication timing regulatory factor 1                     | RIF1     | 694817 |
| REST corepressor 3                                         | RCOR3    | 712037 |
| Retbindin                                                  | RTBDN    | 716766 |
| Reticulon 4                                                | RTN4     | 619181 |
| Reticulon 4 interacting protein 1                          | RTN4IP1  | 697236 |
| Retinoblastoma binding protein 4                           | RBBP4    | 708710 |
| Retinoblastoma binding protein 8                           | RBBP8    | 677718 |
| Retinoic acid induced 1                                    | RAI1     | 699215 |
| Retinol dehydrogenase 5 (11-cis/9-cis)                     | RDH5     | 709644 |
| Reversion-inducing-cysteine-rich protein with kazal motifs | RECK     | 694043 |
| RFT1 homolog                                               | RFT1     | 694586 |
| Rho family gtpase 3                                        | RND3     | 694168 |
| Rho gtpase activating protein 21                           | ARHGAP21 | 706428 |
| Rho guanine nucleotide exchange factor 1                   | ARHGEF1  | 722198 |
| Rho guanine nucleotide exchange factor 10                  | ARHGEF10 | 722745 |
| Rhomboid 5 homolog 2 (Drosophila)                          | RHBDF2   | 707033 |
| Ribonuclease P/MRP 21kda subunit                           | RPP21    | 713056 |
| Ribonuclease P/MRP 40kda subunit                           | RPP40    | 710505 |
| Ribophorin II                                              | RPN2     | 708971 |

|                                                                 |          |           |
|-----------------------------------------------------------------|----------|-----------|
| Ribosomal protein l10a                                          | RPL10A   | 718783    |
| Ribosomal protein L17                                           | RPL17    | 698967    |
| Ribosomal protein L22                                           | RPL22    | 703050    |
| Ribosomal protein L23                                           | RPL23    | 694719    |
| Ribosomal protein l23a                                          | RPL23A   | 710490    |
| Ribosomal protein L24                                           | RPL24    | 702381    |
| Ribosomal protein L26                                           | RPL26    | 717378    |
| Ribosomal protein L26 like 1                                    | RPL26L1  | 703230    |
| Ribosomal protein L27                                           | RPL27    | 712352    |
| Ribosomal protein l27a                                          | RPL27A   | 708863    |
| Ribosomal protein L3                                            | RPL3     | 707176    |
| Ribosomal protein L35                                           | RPL35    | 693604    |
| Ribosomal protein l35a                                          | RPL35A   | 714858    |
| Ribosomal protein L4                                            | RPL4     | 710590    |
| Ribosomal protein l7a                                           | RPL7A    | 722215    |
| Ribosomal protein L8                                            | RPL8     | 708535    |
| Ribosomal protein S10                                           | RPS10    | 718606    |
| Ribosomal protein S11                                           | RPS11    | 718844    |
| Ribosomal protein S13                                           | RPS13    | 697513    |
| Ribosomal protein S14                                           | RPS14    | 710901    |
| Ribosomal protein S16                                           | RPS16    | 697219    |
| Ribosomal protein S17-like                                      | RPS17L   | 100425104 |
| Ribosomal protein S19 binding protein 1                         | RPS19BP1 | 704079    |
| Ribosomal protein S2                                            | RPS2     | 693615    |
| Ribosomal protein S21                                           | RPS21    | 699565    |
| Ribosomal protein S27                                           | RPS27    | 106992520 |
| Ribosomal protein S27 like                                      | RPS27L   | 705483    |
| Ribosomal protein s27a                                          | RPS27A   | 718909    |
| Ribosomal protein S28                                           | RPS28    | 707133    |
| Ribosomal protein S4, X-linked                                  | RPS4X    | 699397    |
| Ribosomal protein S5                                            | RPS5     | 711259    |
| Ribosomal protein S7                                            | RPS7     | 721900    |
| Ribosomal protein S8                                            | RPS8     | 703957    |
| Ribosomal protein, large, P0                                    | RPLP0    | 574363    |
| Ribosomal protein, large, P1                                    | RPLP1    | 695442    |
| Ribosomal protein, large, P2                                    | RPLP2    | 700698    |
| Ribosomal RNA adenine dimethylase domain containing 1           | RRNAD1   | 718599    |
| Ribosomal RNA processing 12 homolog                             | RRP12    | 705854    |
| Ribosomal RNA processing 8, methyltransferase, homolog (yeast)  | RRP8     | 712011    |
| Ribosome production factor 1 homolog                            | RPF1     | 710286    |
| Ring finger and WD repeat domain 2, E3 ubiquitin protein ligase | RFWD2    | 708802    |
| Ring finger protein (C3H2C3 type) 6                             | RNF6     | 721550    |
| Ring finger protein 112                                         | RNF112   | 703312    |
| Ring finger protein 115                                         | RNF115   | 697067    |
| Ring finger protein 130                                         | RNF130   | 715356    |
| Ring finger protein 14                                          | RNF14    | 705363    |
| Ring finger protein 146                                         | RNF146   | 712152    |
| Ring finger protein 167                                         | RNF167   | 710656    |

|                                                                             |          |           |
|-----------------------------------------------------------------------------|----------|-----------|
| Ring finger protein 185                                                     | RNF185   | 718351    |
| Ring finger protein 219                                                     | RNF219   | 697577    |
| Ring finger protein 34, E3 ubiquitin protein ligase                         | RNF34    | 700062    |
| Ring finger protein 38                                                      | RNF38    | 693346    |
| RNA 2',3'-cyclic phosphate and 5'-OH ligase                                 | RTCB     | 717258    |
| RNA binding motif protein 10                                                | RBM10    | 711791    |
| RNA binding motif protein 15                                                | RBM15    | 701414    |
| RNA binding motif protein 17                                                | RBM17    | 712996    |
| RNA binding motif protein 22                                                | RBM22    | 712713    |
| RNA binding motif protein 39                                                | RBM39    | 704198    |
| RNA binding motif protein 45                                                | RBM45    | 702714    |
| RNA binding motif protein 5                                                 | RBM5     | 704114    |
| RNA exonuclease 2                                                           | REXO2    | 695292    |
| RNA polymerase II associated protein 3                                      | RPAP3    | 703749    |
| RNA pseudouridylylase domain containing 3                                   | RPUSD3   | 700349    |
| Runt-related transcription factor 1; translocated to, 1 (cyclin D -related) | RUNX1T1  | 696934    |
| Ruvb-like AAA ATPase 2                                                      | RUVBL2   | 100428792 |
| RWD domain containing 2A                                                    | RWDD2A   | 694598    |
| RWD domain containing 3                                                     | RWDD3    | 709817    |
| SAC1 suppressor of actin mutations 1-like (yeast)                           | SACM1L   | 714107    |
| SAGA complex associated factor 29                                           | SGF29    | 709124    |
| Sarcoglycan epsilon                                                         | SGCE     | 700104    |
| Sarcolemma associated protein                                               | SLMAP    | 703086    |
| SCY1-like, kinase-like 2                                                    | SCYL2    | 695284    |
| SCY1-like, kinase-like 3                                                    | SCYL3    | 701768    |
| SEC13 homolog, nuclear pore and COPII coat complex component                | SEC13    | 697339    |
| SEC22 homolog A, vesicle trafficking protein                                | SEC22A   | 715277    |
| SEC22 homolog C, vesicle trafficking protein                                | SEC22C   | 716351    |
| Sec23 homolog B, COPII coat complex component                               | SEC23B   | 698440    |
| SEC24 homolog C, COPII coat complex component                               | SEC24C   | 714688    |
| SEC31 homolog A, COPII coat complex component                               | SEC31A   | 693687    |
| Sec61 translocon alpha 1 subunit                                            | SEC61A1  | 709787    |
| Sec61 translocon alpha 2 subunit                                            | SEC61A2  | 100427728 |
| Sec61 translocon beta subunit                                               | SEC61B   | 717815    |
| Sec61 translocon gamma subunit                                              | SEC61G   | 716898    |
| SECIS binding protein 2                                                     | SECISBP2 | 697442    |
| Secreted frizzled-related protein 1                                         | SFRP1    | 702876    |
| Secretion associated, Ras related gtpase 1A                                 | SAR1A    | 711277    |
| Sel-1 suppressor of lin-12-like 3 (C. Elegans)                              | SEL1L3   | 695033    |
| Selenoprotein K                                                             | SELK     | 693421    |
| Selenoprotein M                                                             | SELM     | 718290    |
| Serglycin                                                                   | SRGN     | 712299    |
| Serine carboxypeptidase 1                                                   | SCPEP1   | 708197    |
| Serine dehydratase-like                                                     | SDSL     | 714721    |
| Serine incorporator 1                                                       | SERINC1  | 713999    |
| Serine palmitoyltransferase small subunit A                                 | SPTSSA   | 717580    |
| Serine peptidase inhibitor, Kunitz type, 2                                  | SPINT2   | 714755    |



|                                                                     |          |           |
|---------------------------------------------------------------------|----------|-----------|
| Serine/arginine-rich splicing factor 1                              | SRSF1    | 713958    |
| Serine/arginine-rich splicing factor 12                             | SRSF12   | 700497    |
| Serine/arginine-rich splicing factor 3                              | SRSF3    | 719123    |
| Serine/arginine-rich splicing factor 4                              | SRSF4    | 717401    |
| Serine/arginine-rich splicing factor 7                              | SRSF7    | 713388    |
| Serine/arginine-rich splicing factor 8                              | SRSF8    | 699079    |
| Serine/threonine kinase 3                                           | STK3     | 707425    |
| Serine/threonine protein kinase 26                                  | STK26    | 707739    |
| Serine/threonine/tyrosine kinase 1                                  | STYK1    | 717844    |
| Serpin peptidase inhibitor, clade G (C1 inhibitor), member 1        | SERPING1 | 703928    |
| Serpin peptidase inhibitor, clade I (neuroserpin), member 1         | SERPINI1 | 699483    |
| SERPINE1 mrna binding protein 1                                     | SERBP1   | 700797    |
| Serum amyloid A like 1                                              | SAAL1    | 695747    |
| Sestrin 1                                                           | SESN1    | 700232    |
| SET and MYND domain containing 2                                    | SMYD2    | 709375    |
| SET and MYND domain containing 3                                    | SMYD3    | 703402    |
| SET domain containing 2                                             | SETD2    | 711825    |
| SET domain containing 5                                             | SETD5    | 704174    |
| SET domain containing 9                                             | SETD9    | 708019    |
| SFI1 centrin binding protein                                        | SFI1     | 716833    |
| SFT2 domain containing 3                                            | SFT2D3   | 699830    |
| SGT1 homolog, MIS12 kinetochore complex assembly<br>cochaperone     | SUGT1    | 694046    |
| SH2B adaptor protein 2                                              | SH2B2    | 714861    |
| SH3 domain binding glutamate-rich protein                           | SH3BGR   | 722581    |
| SH3 domain containing ring finger 1                                 | SH3RF1   | 694082    |
| SH3-domain binding protein 1                                        | SH3BP1   | 700647    |
| SH3-domain binding protein 4                                        | SH3BP4   | 693393    |
| SH3-domain GRB2-like endophilin B1                                  | SH3GLB1  | 712393    |
| SHC (Src homology 2 domain containing) transforming protein 1       | SHC1     | 718982    |
| Shroom family member 3                                              | SHROOM3  | 699613    |
| Siah E3 ubiquitin protein ligase 1                                  | SIAH1    | 716629    |
| Sialic acid binding Ig-like lectin 10                               | SIGLEC10 | 719648    |
| Sideroflexin 1                                                      | SFXN1    | 695107    |
| Sideroflexin 2                                                      | SFXN2    | 713841    |
| Sideroflexin 4                                                      | SFXN4    | 702765    |
| Signal peptidase complex subunit 1                                  | SPCS1    | 696426    |
| Signal peptide, CUB domain, EGF-like 2                              | SCUBE2   | 708152    |
| Signal recognition particle 68kda                                   | SRP68    | 705568    |
| Signal sequence receptor, alpha                                     | SSR1     | 693818    |
| Signal sequence receptor, beta (translocon-associated protein beta) | SSR2     | 719383    |
| Signal sequence receptor, delta                                     | SSR4     | 697266    |
| Sin3A associated protein 18kda                                      | SAP18    | 703078    |
| Sin3A associated protein 25kda                                      | SAP25    | 106997576 |
| Sin3A associated protein 30kda                                      | SAP30    | 696519    |
| Single-stranded DNA binding protein 1, mitochondrial                | SSBP1    | 694459    |
| SIVA1, apoptosis-inducing factor                                    | SIVA1    | 706688    |
| Sjogren syndrome nuclear autoantigen 1                              | SSNA1    | 706507    |

|                                                                                             |          |        |
|---------------------------------------------------------------------------------------------|----------|--------|
| SKI-like proto-oncogene                                                                     | SKIL     | 696680 |
| SLIT and NTRK like family member 1                                                          | SLITRK1  | 699217 |
| Smad nuclear interacting protein 1                                                          | SNIP1    | 713733 |
| Small nuclear ribonucleoprotein D2 polypeptide                                              | SNRPD2   | 715183 |
| Small nuclear ribonucleoprotein polypeptide E                                               | SNRPE    | 701418 |
| Small nuclear ribonucleoprotein polypeptide G                                               | SNRPG    | 702586 |
| Small nuclear ribonucleoprotein polypeptides B and B1                                       | SNRPB    | 716578 |
| Small ubiquitin-like modifier 1                                                             | SUMO1    | 703644 |
| SMG7 nonsense mediated mrna decay factor                                                    | SMG7     | 717603 |
| SMG8 nonsense mediated mrna decay factor                                                    | SMG8     | 711172 |
| Smoothelin                                                                                  | SMTN     | 716424 |
| SMYD family member 5                                                                        | SMYD5    | 705926 |
| SNAP-associated protein                                                                     | SNAPIN   | 715546 |
| SNRPN upstream reading frame                                                                | SNURF    | 711028 |
| Sodium channel modifier 1                                                                   | SCNM1    | 709922 |
| Sodium channel, non voltage gated 1 beta subunit                                            | SCNN1B   | 700093 |
| Solute carrier family 16 member 11                                                          | SLC16A11 | 721775 |
| Solute carrier family 18 (vesicular monoamine transporter), member 2                        | SLC18A2  | 701133 |
| Solute carrier family 2 (facilitated glucose transporter), member 13                        | SLC2A13  | 697822 |
| Solute carrier family 2 (facilitated glucose transporter), member 3                         | SLC2A3   | 715915 |
| Solute carrier family 20 (phosphate transporter), member 1                                  | SLC20A1  | 699462 |
| Solute carrier family 22 (organic anion transporter), member 6                              | SLC22A6  | 718377 |
| Solute carrier family 22 member 17                                                          | SLC22A17 | 713765 |
| Solute carrier family 22 member 18                                                          | SLC22A18 | 721230 |
| Solute carrier family 25 (aspartate/glutamate carrier), member 12                           | SLC25A12 | 695173 |
| Solute carrier family 25 (carnitine/acylcarnitine translocase), member 20                   | SLC25A20 | 709029 |
| Solute carrier family 25 (mitochondrial carrier; adenine nucleotide translocator), member 5 | SLC25A5  | 693502 |
| Solute carrier family 25 (mitochondrial carrier; phosphate carrier), member 24              | SLC25A24 | 694803 |
| Solute carrier family 25 (mitochondrial carrier; phosphate carrier), member 25              | SLC25A25 | 698216 |
| Solute carrier family 25 (S-adenosylmethionine carrier), member 26                          | SLC25A26 | 697960 |
| Solute carrier family 25 member 41                                                          | SLC25A41 | 702790 |
| Solute carrier family 25 member 46                                                          | SLC25A46 | 705968 |
| Solute carrier family 26 (anion exchanger), member 8                                        | SLC26A8  | 719049 |
| Solute carrier family 35 (adenosine 3'-phospho 5'-phosphosulfate transporter), member B3    | SLC35B3  | 698416 |
| Solute carrier family 35 (UDP-galactose transporter), member A2                             | SLC35A2  | 711587 |
| Solute carrier family 35 (UDP-glca/UDP-galnac transporter), member D1                       | SLC35D1  | 700175 |
| Solute carrier family 35 member B1                                                          | SLC35B1  | 699953 |

|                                                                                               |          |        |
|-----------------------------------------------------------------------------------------------|----------|--------|
| Solute carrier family 38 member 1                                                             | SLC38A1  | 702135 |
| Solute carrier family 38 member 6                                                             | SLC38A6  | 704017 |
| Solute carrier family 39 (zinc transporter), member 13                                        | SLC39A13 | 713420 |
| Solute carrier family 4 (anion exchanger), member 1, adaptor protein                          | SLC4A1AP | 701783 |
| Solute carrier family 4 (anion exchanger), member 2                                           | SLC4A2   | 713966 |
| Solute carrier family 4, sodium borate transporter, member 11                                 | SLC4A11  | 718393 |
| Solute carrier family 41 member 3                                                             | SLC41A3  | 716921 |
| Solute carrier family 44 member 3                                                             | SLC44A3  | 714768 |
| Solute carrier family 44 member 4                                                             | SLC44A4  | 715779 |
| Solute carrier family 6 (neurotransmitter transporter), member 8                              | SLC6A8   | 698307 |
| Solute carrier family 7 (amino acid transporter light chain, L system), member 8              | SLC7A8   | 713511 |
| Solute carrier family 9, subfamily A (NHE3, cation proton antiporter 3), member 3 regulator 2 | SLC9A3R2 | 694658 |
| Solute carrier organic anion transporter family member 2B1                                    | SLCO2B1  | 694829 |
| SON DNA binding protein                                                                       | SON      | 704712 |
| Sorting nexin 1                                                                               | SNX1     | 706544 |
| Sorting nexin 11                                                                              | SNX11    | 696913 |
| Sorting nexin 13                                                                              | SNX13    | 714019 |
| Sorting nexin 14                                                                              | SNX14    | 696632 |
| Sorting nexin 3                                                                               | SNX3     | 700989 |
| Sorting nexin 33                                                                              | SNX33    | 706309 |
| SOS Ras/Rho guanine nucleotide exchange factor 2                                              | SOS2     | 705601 |
| SP110 nuclear body protein                                                                    | SP110    | 714244 |
| Sp2 transcription factor                                                                      | SP2      | 694834 |
| Sp3 transcription factor                                                                      | SP3      | 699901 |
| SPARC like 1                                                                                  | SPARCL1  | 701468 |
| Spastic paraplegia 11 (autosomal recessive)                                                   | SPG11    | 712221 |
| Spastic paraplegia 21 (autosomal recessive, Mast syndrome)                                    | SPG21    | 712815 |
| Spectrin, beta, non-erythrocytic 1                                                            | SPTBN1   | 716794 |
| Spen family transcriptional repressor                                                         | SPEN     | 696205 |
| Sperm acrosome associated 1                                                                   | SPACA1   | 699611 |
| Sperm antigen with calponin homology and coiled-coil domains 1-like                           | SPECC1L  | 707641 |
| Sperm associated antigen 5                                                                    | SPAG5    | 709400 |
| Sperm flagellar 1                                                                             | SPEF1    | 717547 |
| Spermatid perinuclear RNA binding protein                                                     | STRBP    | 695402 |
| Spermatogenesis associated 2-like                                                             | SPATA2L  | 699974 |
| Spermatogenesis associated 5-like 1                                                           | SPATA5L1 | 713376 |
| Spermatogenesis associated 7                                                                  | SPATA7   | 693836 |
| Spermatogenesis associated, serine rich 2 like                                                | SPATS2L  | 699458 |
| Spermidine/spermine N1-acetyltransferase 1                                                    | SAT1     | 697884 |
| Spermine synthase                                                                             | SMS      | 698179 |
| Sphingomyelin phosphodiesterase 2                                                             | SMPD2    | 698865 |
| Splicing factor 3a subunit 2                                                                  | SF3A2    | 721469 |
| Splicing factor 3b subunit 5                                                                  | SF3B5    | 699863 |

|                                                                                              |          |        |
|----------------------------------------------------------------------------------------------|----------|--------|
| Splicing factor 3b, subunit 1, 155kda                                                        | SF3B1    | 697773 |
| Splicing factor 3b, subunit 4, 49kda                                                         | SF3B4    | 705655 |
| Split hand/foot malformation (ectrodactyly) type 1                                           | SHFM1    | 698349 |
| SPRY domain containing 4                                                                     | SPRYD4   | 713037 |
| SPT4 homolog, DSIF elongation factor subunit                                                 | SUPT4H1  | 710214 |
| Squamous cell carcinoma antigen recognized by T-cells 3                                      | SART3    | 705552 |
| Src-related kinase lacking C-terminal regulatory tyrosine and N-terminal myristylation sites | SRMS     | 719587 |
| SRP receptor alpha subunit                                                                   | SRPRA    | 714215 |
| SR-related CTD-associated factor 11                                                          | SCAF11   | 701894 |
| SRSF protein kinase 1                                                                        | SRPK1    | 719039 |
| SRY-box 11                                                                                   | SOX11    | 707983 |
| SRY-box 13                                                                                   | SOX13    | 700802 |
| ST3 beta-galactoside alpha-2,3-sialyltransferase 4                                           | ST3GAL4  | 717792 |
| Staphylococcal nuclease and tudor domain containing 1                                        | SND1     | 699542 |
| Star related lipid transfer domain containing 3                                              | STARD3   | 697212 |
| Star related lipid transfer domain containing 5                                              | STARD5   | 713308 |
| STARD3 N-terminal like                                                                       | STARD3NL | 705212 |
| Stathmin 1                                                                                   | STMN1    | 719733 |
| Staufen double-stranded RNA binding protein 1                                                | STAU1    | 704197 |
| STE20-related kinase adaptor alpha                                                           | STRADA   | 717927 |
| STIP1 homology and U-box containing protein 1, E3 ubiquitin protein ligase                   | STUB1    | 697105 |
| Stomatin like 2                                                                              | STOML2   | 698458 |
| Storkhead box 2                                                                              | STOX2    | 693692 |
| Stratifin                                                                                    | SFN      | 715055 |
| Strawberry notch homolog 2 (Drosophila)                                                      | SBNO2    | 721186 |
| Striatin interacting protein 1                                                               | STRIP1   | 700799 |
| Stromal cell derived factor 4                                                                | SDF4     | 699804 |
| Stromal cell-derived factor 2                                                                | SDF2     | 716189 |
| Structural maintenance of chromosomes 4                                                      | SMC4     | 702615 |
| Structure specific recognition protein 1                                                     | SSRP1    | 706614 |
| STT3A, subunit of the oligosaccharyltransferase complex (catalytic)                          | STT3A    | 717056 |
| SUB1 homolog, transcriptional regulator                                                      | SUB1     | 701045 |
| Succinate dehydrogenase complex assembly factor 2                                            | SDHAF2   | 693401 |
| Succinate dehydrogenase complex subunit A, flavoprotein (Fp)                                 | SDHA     | 708018 |
| Succinate dehydrogenase complex subunit B, iron sulfur (Ip)                                  | SDHB     | 699810 |
| Succinate dehydrogenase complex, subunit D, integral membrane protein                        | SDHD     | 711326 |
| Succinate-coa ligase, GDP-forming, beta subunit                                              | SUCLG2   | 697454 |
| Sulfatase 2                                                                                  | SULF2    | 715937 |
| Sulfiredoxin 1                                                                               | SRXN1    | 714997 |
| SUMO1/sentrin specific peptidase 5                                                           | SEN5     | 710223 |
| SUMO1/sentrin specific peptidase 6                                                           | SEN6     | 716554 |
| SUMO1/sentrin specific peptidase 7                                                           | SEN7     | 701453 |
| SUN domain containing ossification factor                                                    | SUCO     | 705776 |
| Superkiller viralicidic activity 2-like 2 (S. Cerevisiae)                                    | SKIV2L2  | 706419 |

|                                                                                                   |         |           |
|---------------------------------------------------------------------------------------------------|---------|-----------|
| Superoxide dismutase 1, soluble                                                                   | SOD1    | 574096    |
| Supervillin                                                                                       | SVIL    | 695267    |
| Suppression of tumorigenicity 13 (colon carcinoma) (Hsp70 interacting protein)                    | ST13    | 705664    |
| Suppressor of cytokine signaling 6                                                                | SOCS6   | 704108    |
| Suppressor of fused homolog (Drosophila)                                                          | SUFU    | 713576    |
| Surfactant associated 2                                                                           | SFTA2   | 714397    |
| Surfeit 4                                                                                         | SURF4   | 100429960 |
| SURP and G-patch domain containing 1                                                              | SUGP1   | 719772    |
| Survival motor neuron domain containing 1                                                         | SMNDC1  | 694761    |
| Survival of motor neuron 1, telomeric                                                             | SMN1    | 677703    |
| SWI/SNF related, matrix associated, actin dependent regulator of chromatin, subfamily a, member 2 | SMARCA2 | 696973    |
| SWI/SNF related, matrix associated, actin dependent regulator of chromatin, subfamily a, member 5 | SMARCA5 | 700614    |
| SWI/SNF related, matrix associated, actin dependent regulator of chromatin, subfamily b, member 1 | SMARCB1 | 699190    |
| SWI/SNF related, matrix associated, actin dependent regulator of chromatin, subfamily e, member 1 | SMARCE1 | 701310    |
| SWT1, RNA endoribonuclease homolog                                                                | SWT1    | 714083    |
| Synaptophysin-like 1                                                                              | SYPL1   | 698350    |
| Synaptosome associated protein 47kda                                                              | SNAP47  | 696700    |
| Synaptotagmin VII                                                                                 | SYT7    | 722368    |
| Syndecan binding protein                                                                          | SDCBP   | 698381    |
| Synemin                                                                                           | SYNM    | 717194    |
| Synovial sarcoma translocation gene on chromosome 18-like 2                                       | SS18L2  | 716387    |
| Syntaxin 1B                                                                                       | STX1B   | 714251    |
| Syntaxin binding protein 3                                                                        | STXBP3  | 699144    |
| Syntaxin binding protein 6 (amisyn)                                                               | STXBP6  | 715357    |
| Synuclein beta                                                                                    | SNCB    | 697484    |
| Tafazzin                                                                                          | TAZ     | 574297    |
| TAM41, mitochondrial translocator assembly and maintenance protein, homolog (S. Cerevisiae)       | C3orf31 | 695998    |
| TAO kinase 2                                                                                      | TAOK2   | 707777    |
| TAR (HIV-1) RNA binding protein 1                                                                 | TARBP1  | 712397    |
| TAR (HIV-1) RNA binding protein 2                                                                 | TARBP2  | 703294    |
| Taspase 1                                                                                         | TASP1   | 694028    |
| Taste 1 receptor member 1                                                                         | TAS1R1  | 720987    |
| TATA-box binding protein associated factor 10                                                     | TAF10   | 710022    |
| TATA-box binding protein associated factor 12                                                     | TAF12   | 717135    |
| TATA-box binding protein associated factor 5                                                      | TAF5    | 714558    |
| TATA-box binding protein associated factor 5 like                                                 | TAF5L   | 693770    |
| TATA-box binding protein associated factor 9                                                      | TAF9    | 700239    |
| TATA-box binding protein associated factor, RNA polymerase I, D                                   | TAF1D   | 696602    |
| Tatd dnase domain containing 1                                                                    | TATDN1  | 706095    |
| Tax1 (human T-cell leukemia virus type I) binding protein 1                                       | TAX1BP1 | 698103    |
| TBC1 domain family member 15                                                                      | TBC1D15 | 718743    |

|                                                                            |         |        |
|----------------------------------------------------------------------------|---------|--------|
| TBC1 domain family member 25                                               | TBC1D25 | 710596 |
| TBC1 domain family member 9                                                | TBC1D9  | 702230 |
| T-box 21                                                                   | TBX21   | 694044 |
| T-cell acute lymphocytic leukemia 2                                        | TAL2    | 712138 |
| TCF3 (E2A) fusion partner (in childhood Leukemia)                          | TFPT    | 720296 |
| Teashirt zinc finger homeobox 1                                            | TSHZ1   | 703018 |
| TELO2 interacting protein 1                                                | TTI1    | 699930 |
| Telomeric repeat binding factor 2, interacting protein                     | TERF2IP | 712149 |
| Tensin 4                                                                   | TNS4    | 701075 |
| TERF1 (TRF1)-interacting nuclear factor 2                                  | TINF2   | 715812 |
| Testin LIM domain protein                                                  | TES     | 706879 |
| Testis expressed 10                                                        | TEX10   | 714536 |
| Testis expressed 28                                                        | TEX28   | 699141 |
| Testis expressed 30                                                        | TEX30   | 701917 |
| Tetraspanin 3                                                              | TSPAN3  | 708428 |
| Tetraspanin 8                                                              | TSPAN8  | 718622 |
| Tetratricopeptide repeat domain 27                                         | TTC27   | 707021 |
| Tetratricopeptide repeat domain 7B                                         | TTC7B   | 696029 |
| Tetratricopeptide repeat domain 9C                                         | TTC9C   | 718583 |
| TGF-beta activated kinase 1/MAP3K7 binding protein 1                       | TAB1    | 703409 |
| TGF-beta activated kinase 1/MAP3K7 binding protein 2                       | TAB2    | 696875 |
| THAP domain containing 7                                                   | THAP7   | 696208 |
| Thioredoxin domain containing 11                                           | TXNDC11 | 711826 |
| Thioredoxin domain containing 12 (endoplasmic reticulum)                   | TXNDC12 | 712891 |
| Thioredoxin domain containing 9                                            | TXNDC9  | 709303 |
| Thioredoxin like 1                                                         | TXNL1   | 695194 |
| Thioredoxin like 4A                                                        | TXNL4A  | 698969 |
| Thiosulfate sulfurtransferase (rhodanese)                                  | TST     | 698021 |
| THO complex 1                                                              | THOC1   | 697954 |
| THO complex 6                                                              | THOC6   | 700217 |
| Thrombospondin 3                                                           | THBS3   | 717572 |
| THUMP domain containing 2                                                  | THUMPD2 | 712045 |
| Thyroid hormone receptor interactor 11                                     | TRIP11  | 697489 |
| Thyroid hormone receptor interactor 12                                     | TRIP12  | 710560 |
| Thyroid hormone receptor interactor 4                                      | TRIP4   | 707263 |
| TIA1 cytotoxic granule-associated RNA binding protein                      | TIA1    | 702366 |
| Titin-cap                                                                  | TCAP    | 697327 |
| TM2 domain containing 2                                                    | TM2D2   | 701007 |
| TNF receptor associated factor 2                                           | TRAF2   | 708391 |
| TNF receptor associated factor 7                                           | TRAF7   | 695415 |
| TNF receptor-associated protein 1                                          | TRAP1   | 706234 |
| Tocopherol (alpha) transfer protein-like                                   | TTPAL   | 712620 |
| Topoisomerase (DNA) II alpha                                               | TOP2A   | 700707 |
| Topoisomerase (DNA) II beta                                                | TOP2B   | 677709 |
| Topoisomerase (DNA) II binding protein 1                                   | TOPBP1  | 719054 |
| Topoisomerase I binding, arginine/serine-rich, E3 ubiquitin protein ligase | TOPORS  | 703930 |
| Torsin family 1, member A (torsin A)                                       | TOR1A   | 722520 |

|                                                                               |          |           |
|-------------------------------------------------------------------------------|----------|-----------|
| Torsin family 2, member A                                                     | TOR2A    | 700203    |
| TP53 induced glycolysis regulatory phosphatase                                | TIGAR    | 721886    |
| TPX2, microtubule-associated                                                  | TPX2     | 712961    |
| TRAF family member associated NFkB activator                                  | TANK     | 700942    |
| TRAF3 interacting protein 2                                                   | TRAF3IP2 | 697530    |
| Trafficking protein particle complex 11                                       | TRAPPC11 | 702066    |
| Trans-2,3-enoyl-coa reductase                                                 | TECR     | 718928    |
| Transaldolase 1                                                               | TALDO1   | 720828    |
| Transcription elongation factor A (SII)-like 7                                | TCEAL7   | 695831    |
| Transcription elongation factor A (SII)-like 8                                | TCEAL8   | 695496    |
| Transcription elongation factor B (SIII), polypeptide 1<br>(15kda, elongin C) | TCEB1    | 698922    |
| Transcription factor A, mitochondrial                                         | TFAM     | 701368    |
| Transcription factor B1, mitochondrial                                        | TFB1M    | 701830    |
| Transducin (beta)-like 1 X-linked receptor 1                                  | TBL1XR1  | 712740    |
| Transducin (beta)-like 3                                                      | TBL3     | 693864    |
| Transducin like enhancer of split 1                                           | TLE1     | 707336    |
| Transferrin receptor                                                          | TFRC     | 711568    |
| Transformer 2 alpha homolog (Drosophila)                                      | TRA2A    | 574247    |
| Transformer 2 beta homolog (Drosophila)                                       | TRA2B    | 574337    |
| Transforming, acidic coiled-coil containing protein 2                         | TACC2    | 705497    |
| Transforming, acidic coiled-coil containing protein 3                         | TACC3    | 712898    |
| Transient receptor potential cation channel, subfamily M,<br>member 5         | TRPM5    | 705070    |
| Transient receptor potential cation channel, subfamily V,<br>member 4         | TRPV4    | 709605    |
| Translational activator of mitochondrially encoded cytochrome<br>c oxidase I  | TACO1    | 717828    |
| Translocase of inner mitochondrial membrane 17 homolog A<br>(yeast)           | TIMM17A  | 707001    |
| Translocase of inner mitochondrial membrane 17 homolog B<br>(yeast)           | TIMM17B  | 714895    |
| Translocase of inner mitochondrial membrane 44 homolog<br>(yeast)             | TIMM44   | 709800    |
| Translocase of inner mitochondrial membrane 8 homolog B<br>(yeast)            | TIMM8B   | 711249    |
| Translocase of inner mitochondrial membrane domain<br>containing 1            | TIMMDC1  | 712414    |
| Translocase of outer mitochondrial membrane 6 homolog<br>(yeast)              | TOMM6    | 100423264 |
| Translocase of outer mitochondrial membrane 70 homolog A<br>(S. Cerevisiae)   | TOMM70A  | 700347    |
| Translocated promoter region, nuclear basket protein                          | TPR      | 713910    |
| Transmembrane 4 L six family member 5                                         | TM4SF5   | 709844    |
| Transmembrane 6 superfamily member 2                                          | TM6SF2   | 719756    |
| Transmembrane 9 superfamily member 1                                          | TM9SF1   | 715472    |
| Transmembrane and ubiquitin-like domain containing 2                          | TMUB2    | 714541    |
| Transmembrane p24 trafficking protein 1                                       | TMED1    | 713618    |

|                                                                   |          |           |
|-------------------------------------------------------------------|----------|-----------|
| Transmembrane p24 trafficking protein 3                           | TMED3    | 711993    |
| Transmembrane p24 trafficking protein 4                           | TMED4    | 699105    |
| Transmembrane p24 trafficking protein 7                           | TMED7    | 100533192 |
| Transmembrane phosphoinositide 3-phosphatase and tensin homolog 2 | TPTE2    | 704870    |
| Transmembrane protease, serine 13                                 | TMPRSS13 | 698586    |
| Transmembrane protein 104                                         | TMEM104  | 698592    |
| Transmembrane protein 115                                         | TMEM115  | 702164    |
| Transmembrane protein 125                                         | TMEM125  | 699920    |
| Transmembrane protein 126A                                        | TMEM126A | 702831    |
| Transmembrane protein 126B                                        | TMEM126B | 702719    |
| Transmembrane protein 132A                                        | TMEM132A | 695291    |
| Transmembrane protein 135                                         | TMEM135  | 704963    |
| Transmembrane protein 138                                         | TMEM138  | 693905    |
| Transmembrane protein 141                                         | TMEM141  | 721687    |
| Transmembrane protein 14A                                         | TMEM14A  | 708829    |
| Transmembrane protein 14C                                         | TMEM14C  | 697976    |
| Transmembrane protein 165                                         | TMEM165  | 696262    |
| Transmembrane protein 168                                         | TMEM168  | 702972    |
| Transmembrane protein 204                                         | TMEM204  | 701926    |
| Transmembrane protein 208                                         | TMEM208  | 697228    |
| Transmembrane protein 216                                         | TMEM216  | 693655    |
| Transmembrane protein 218                                         | TMEM218  | 100430360 |
| Transmembrane protein 243                                         | TMEM243  | 706405    |
| Transmembrane protein 245                                         | TMEM245  | 710299    |
| Transmembrane protein 254                                         | TMEM254  | 701130    |
| Transmembrane protein 261                                         | TMEM261  | 716818    |
| Transmembrane protein 30A                                         | TMEM30A  | 717907    |
| Transmembrane protein 33                                          | TMEM33   | 702063    |
| Transmembrane protein 39B                                         | TMEM39B  | 706700    |
| Transmembrane protein 42                                          | TMEM42   | 714654    |
| Transmembrane protein 45B                                         | TMEM45B  | 718735    |
| Transmembrane protein 5                                           | TMEM5    | 717102    |
| Transmembrane protein 59                                          | TMEM59   | 714942    |
| Transmembrane protein 94                                          | TMEM94   | 702374    |
| Transmembrane protein, adipocyte associated 1                     | TPRA1    | 707221    |
| Transporter 1, ATP-binding cassette, sub-family B (MDR/TAP)       | TAP1     | 717726    |
| Tribbles pseudokinase 2                                           | TRIB2    | 710966    |
| Triokinase/FMN cyclase                                            | TKFC     | 694117    |
| Tripartite motif containing 11                                    | TRIM11   | 694150    |
| Tripartite motif containing 24                                    | TRIM24   | 710229    |
| Tripartite motif containing 27                                    | TRIM27   | 706129    |
| Tripartite motif containing 37                                    | TRIM37   | 710934    |
| Tripartite motif containing 41                                    | TRIM41   | 708426    |
| Tripartite motif containing 8                                     | TRIM8    | 713701    |
| TRK-fused gene                                                    | TFG      | 700972    |
| Trna 5-methylaminomethyl-2-thiouridylate methyltransferase        | TRMU     | 714268    |
| Trna isopentenyltransferase 1                                     | TRIT1    | 716422    |



|                                                                              |         |           |
|------------------------------------------------------------------------------|---------|-----------|
| Trna methyltransferase 11 homolog                                            | TRMT11  | 712712    |
| Trna methyltransferase 11-2 homolog (S. Cerevisiae)                          | TRMT112 | 717676    |
| Trna methyltransferase 6                                                     | TRMT6   | 718229    |
| Trna methyltransferase O                                                     | TRMO    | 715609    |
| Trna phosphotransferase 1                                                    | TRPT1   | 717911    |
| Trna splicing endonuclease subunit 15                                        | TSEN15  | 717481    |
| Tropomodulin 4                                                               | TMOD4   | 709732    |
| Tropomyosin 2 (beta)                                                         | TPM2    | 696604    |
| Tryptase gamma 1                                                             | TPSG1   | 100425752 |
| TSC22 domain family member 1                                                 | TSC22D1 | 701076    |
| TSPY-like 4                                                                  | TSPYL4  | 716137    |
| TSSK6 activating co-chaperone                                                | TSACC   | 719490    |
| Tubulin alpha 1a                                                             | TUBA1A  | 574194    |
| Tubulin folding cofactor C                                                   | TBCC    | 696997    |
| Tubulin folding cofactor E                                                   | TBCE    | 711476    |
| Tubulin, alpha 1b                                                            | TUBA1B  | 709643    |
| Tudor domain containing 3                                                    | TDRD3   | 696228    |
| Tudor domain containing 7                                                    | TDRD7   | 641450    |
| Tumor necrosis factor (ligand) superfamily, member 12                        | TNFSF12 | 100551504 |
| Tumor protein D52-like 1                                                     | TPD52L1 | 716568    |
| Tumor protein p53 binding protein 1                                          | TP53BP1 | 710237    |
| Tumor protein, translationally-controlled 1                                  | TPT1    | 702155    |
| Tumor suppressing subtransferable candidate 4                                | TSSC4   | 705185    |
| Tumor suppressor candidate 3                                                 | TUSC3   | 701123    |
| Twist family bhlh transcription factor 1                                     | TWIST1  | 574278    |
| Twist family bhlh transcription factor 2                                     | TWIST2  | 697078    |
| TWIST neighbor                                                               | TWISTNB | 707781    |
| Twisted gastrulation homolog 1 (Drosophila)                                  | TWSG1   | 705804    |
| Tyrosine 3-monooxygenase/tryptophan 5-monooxygenase activation protein, beta | YWHAB   | 717788    |
| Tyrosine 3-monooxygenase/tryptophan 5-monooxygenase activation protein, eta  | YWHAH   | 717016    |
| Tyrosine hydroxylase                                                         | TH      | 721137    |
| Tyrosine kinase, non-receptor, 1                                             | TNK1    | 715180    |
| Tyrosyl-DNA phosphodiesterase 2                                              | TDP2    | 715162    |
| Ubiquilin 1                                                                  | UBQLN1  | 713525    |
| Ubiquinol-cytochrome c reductase core protein II                             | UQCRC2  | 697967    |
| Ubiquinol-cytochrome c reductase, 6.4kda subunit                             | UQCR    | 708396    |
| Ubiquinol-cytochrome c reductase, complex III subunit VII, 9.5kda            | UQCRQ   | 708950    |
| Ubiquitin A-52 residue ribosomal protein fusion product 1                    | UBA52   | 720243    |
| Ubiquitin B                                                                  | UBB     | 696110    |
| Ubiquitin conjugating enzyme E2 variant 1                                    | UBE2V1  | 100425552 |
| Ubiquitin conjugating enzyme E2A                                             | UBE2A   | 693716    |
| Ubiquitin conjugating enzyme E2D 4 (putative)                                | UBE2D4  | 707831    |
| Ubiquitin conjugating enzyme E2E 3                                           | UBE2E3  | 704530    |
| Ubiquitin conjugating enzyme E2F (putative)                                  | UBE2F   | 695394    |
| Ubiquitin conjugating enzyme E2I                                             | UBE2I   | 722434    |

|                                                                    |         |           |
|--------------------------------------------------------------------|---------|-----------|
| Ubiquitin conjugating enzyme E2O                                   | UBE2O   | 710529    |
| Ubiquitin C-terminal hydrolase L3                                  | UCHL3   | 697276    |
| Ubiquitin like 5                                                   | UBL5    | 711015    |
| Ubiquitin like 7                                                   | UBL7    | 702305    |
| Ubiquitin like domain containing CTD phosphatase 1                 | UBLCP1  | 694476    |
| Ubiquitin protein ligase E3 component n-recognin 7 (putative)      | UBR7    | 698882    |
| Ubiquitin protein ligase E3B                                       | UBE3B   | 707324    |
| Ubiquitin related modifier 1                                       | URM1    | 722618    |
| Ubiquitin specific peptidase 10                                    | USP10   | 718471    |
| Ubiquitin specific peptidase 13 (isopeptidase T-3)                 | USP13   | 708624    |
| Ubiquitin specific peptidase 16                                    | USP16   | 706403    |
| Ubiquitin specific peptidase 21                                    | USP21   | 719894    |
| Ubiquitin specific peptidase 25                                    | USP25   | 716923    |
| Ubiquitin specific peptidase 3                                     | USP3    | 705973    |
| Ubiquitin specific peptidase 38                                    | USP38   | 700235    |
| Ubiquitin specific peptidase 39                                    | USP39   | 696217    |
| Ubiquitin specific peptidase 51                                    | USP51   | 705861    |
| Ubiquitin specific peptidase 8                                     | USP8    | 715523    |
| Ubiquitination factor E4B                                          | UBE4B   | 713348    |
| Ubiquitin-like modifier activating enzyme 2                        | UBA2    | 705808    |
| Ubiquitin-like modifier activating enzyme 3                        | UBA3    | 696493    |
| Ubiquitin-like with PHD and ring finger domains 1                  | UHRF1   | 695531    |
| U-box domain containing 5                                          | UBOX5   | 717166    |
| UBX domain protein 11                                              | UBXN11  | 719826    |
| UDP-Gal:betaglcnaac beta 1,4- galactosyltransferase, polypeptide 3 | B4GALT3 | 719920    |
| UDP-glcnaac:betagal beta-1,3-N-acetylglucosaminyltransferase 2     | B3GNT2  | 693396    |
| UDP-glucose pyrophosphorylase 2                                    | UGP2    | 695178    |
| UDP-N-acetylglucosamine pyrophosphorylase 1                        | UAP1    | 720116    |
| Unconventional SNARE in the ER 1 homolog (S. Cerevisiae)           | USE1    | 718905    |
| UPF3 regulator of nonsense transcripts homolog B (yeast)           | UPF3B   | 694247    |
| Up-regulated during skeletal muscle growth 5 homolog (mouse)       | USMG5   | 100428448 |
| Upstream binding protein 1 (LBP-1a)                                | UBP1    | 706283    |
| Uranyl-2-sulfotransferase                                          | UST     | 697355    |
| USP6 N-terminal like                                               | USP6NL  | 694275    |
| UTP14, U3 small nucleolar ribonucleoprotein, homolog C (yeast)     | UTP14C  | 709657    |
| UTP6 small subunit processome component                            | UTP6    | 713361    |
| UV radiation resistance associated                                 | UVRAG   | 696601    |
| Vac14 homolog (S. Cerevisiae)                                      | VAC14   | 708741    |
| Vaccinia related kinase 1                                          | VRK1    | 704798    |
| Vacuolar protein sorting 13 homolog C (S. Cerevisiae)              | VPS13C  | 709080    |
| Vacuolar protein sorting 4 homolog A (S. Cerevisiae)               | VPS4A   | 705277    |
| Vacuolar protein sorting 45 homolog (S. Cerevisiae)                | VPS45   | 706035    |
| Vacuolar protein sorting 72 homolog (S. Cerevisiae)                | VPS72   | 709818    |
| V-akt murine thymoma viral oncogene homolog 3                      | AKT3    | 714717    |
| Valosin containing protein lysine (K) methyltransferase            | VCPKMT  | 705487    |
| Valyl-trna synthetase                                              | VARS    | 715537    |
| Vav guanine nucleotide exchange factor 1                           | VAV1    | 100424248 |
| Vav guanine nucleotide exchange factor 3                           | VAV3    | 694685    |

|                                                                                   |         |        |
|-----------------------------------------------------------------------------------|---------|--------|
| Very low density lipoprotein receptor                                             | VLDLR   | 574284 |
| Vesicle associated membrane protein 7                                             | VAMP7   | 704160 |
| Vitronectin                                                                       | VTN     | 708499 |
| V-myc avian myelocytomatosis viral oncogene neuroblastoma derived homolog         | MYCN    | 698699 |
| Voltage-dependent anion channel 1                                                 | VDAC1   | 710045 |
| Voltage-dependent anion channel 2                                                 | VDAC2   | 704257 |
| VPS11, CORVET/HOPS core subunit                                                   | VPS11   | 702834 |
| VPS26 retromer complex component B                                                | VPS26B  | 694566 |
| VPS29 retromer complex component                                                  | VPS29   | 709646 |
| VPS33B interacting protein, apical-basolateral polarity regulator, spe-39 homolog | VIPAS39 | 706315 |
| VPS8, CORVET complex subunit                                                      | VPS8    | 701567 |
| V-ral simian leukemia viral oncogene homolog A (ras related)                      | RALA    | 703440 |
| V-ral simian leukemia viral oncogene homolog B                                    | RALB    | 695852 |
| WD repeat containing, antisense to TP53                                           | WRAP53  | 716125 |
| WD repeat domain 11                                                               | WDR11   | 714990 |
| WD repeat domain 12                                                               | WDR12   | 705623 |
| WD repeat domain 19                                                               | WDR19   | 698866 |
| WD repeat domain 20                                                               | WDR20   | 708533 |
| WD repeat domain 26                                                               | WDR26   | 704911 |
| WD repeat domain 3                                                                | WDR3    | 711960 |
| WD repeat domain 35                                                               | WDR35   | 716638 |
| WD repeat domain 4                                                                | WDR4    | 714230 |
| WD repeat domain 47                                                               | WDR47   | 696942 |
| WD repeat domain 53                                                               | WDR53   | 709710 |
| WD repeat domain 6                                                                | WDR6    | 708505 |
| WD repeat domain 61                                                               | WDR61   | 709971 |
| WD repeat domain 70                                                               | WDR70   | 706130 |
| WD repeat domain 74                                                               | WDR74   | 718460 |
| WD repeat domain 75                                                               | WDR75   | 709104 |
| WD repeat domain 77                                                               | WDR77   | 677686 |
| WD repeat, sterile alpha motif and U-box domain containing 1                      | WDSUB1  | 699456 |
| WDYHV motif containing 1                                                          | WDYHV1  | 704686 |
| WEE1 G2 checkpoint kinase                                                         | WEE1    | 703760 |
| Werner helicase interacting protein 1                                             | WRNIP1  | 707250 |
| Williams Beuren syndrome chromosome region 22                                     | WBSCR22 | 720121 |
| Wilms tumor 1 associated protein                                                  | WTAP    | 702295 |
| Wingless-type MMTV integration site family member 11                              | WNT11   | 696845 |
| Wiskott-Aldrich syndrome-like                                                     | WASL    | 696556 |
| WSC domain containing 1                                                           | WSCD1   | 712488 |
| WW domain binding protein 1                                                       | WBP1    | 709202 |
| WW domain binding protein 11                                                      | WBP11   | 699451 |
| WW domain binding protein 2                                                       | WBP2    | 704545 |
| WW domain binding protein 5                                                       | WBP5    | 696661 |
| WW domain containing adaptor with coiled-coil                                     | WAC     | 715828 |
| WW domain containing E3 ubiquitin protein ligase 2                                | WWP2    | 705464 |
| X-box binding protein 1                                                           | XBP1    | 713863 |

|                                                                        |          |           |
|------------------------------------------------------------------------|----------|-----------|
| Xeroderma pigmentosum, complementation group A                         | XPA      | 715705    |
| X-ray repair complementing defective repair in Chinese hamster cells 6 | XRCC6    | 707975    |
| XRCC6 binding protein 1                                                | XRCC6BP1 | 712932    |
| Yae1 domain containing 1                                               | YAE1D1   | 703786    |
| YEATS domain containing 4                                              | YEATS4   | 718376    |
| Yip1 domain family member 4                                            | YIPF4    | 706819    |
| Yip1 interacting factor homolog A (S. Cerevisiae)                      | YIF1A    | 714486    |
| Yippee like 3                                                          | YPEL3    | 708740    |
| Zinc finger (CCCH type), RNA binding motif and serine/arginine rich 2  | ZRSR2    | 720986    |
| Zinc finger and BTB domain containing 26                               | ZBTB26   | 698776    |
| Zinc finger and BTB domain containing 33                               | ZBTB33   | 695801    |
| Zinc finger and BTB domain containing 39                               | ZBTB39   | 713914    |
| Zinc finger and BTB domain containing 49                               | ZBTB49   | 712422    |
| Zinc finger and BTB domain containing 5                                | ZBTB5    | 718482    |
| Zinc finger and SCAN domain containing 29                              | ZSCAN29  | 710414    |
| Zinc finger and SCAN domain containing 32                              | ZSCAN32  | 702733    |
| Zinc finger CCCH-type containing 12A                                   | ZC3H12A  | 713604    |
| Zinc finger CCCH-type containing 3                                     | ZC3H3    | 708584    |
| Zinc finger CCCH-type containing 7A                                    | ZC3H7A   | 711984    |
| Zinc finger protein 140                                                | ZNF140   | 695171    |
| Zinc finger protein 180                                                | ZNF180   | 712493    |
| Zinc finger protein 181                                                | ZNF181   | 106992424 |
| Zinc finger protein 207                                                | ZNF207   | 100689488 |
| Zinc finger protein 211                                                | ZNF211   | 100429296 |
| Zinc finger protein 22                                                 | ZNF22    | 706208    |
| Zinc finger protein 221                                                | ZNF221   | 100423744 |
| Zinc finger protein 239                                                | ZNF239   | 717737    |
| Zinc finger protein 25                                                 | ZNF25    | 701129    |
| Zinc finger protein 263                                                | ZNF263   | 702166    |
| Zinc finger protein 280D                                               | ZNF280D  | 699509    |
| Zinc finger protein 281                                                | ZNF281   | 709466    |
| Zinc finger protein 322                                                | ZNF322   | 701098    |
| Zinc finger protein 385A                                               | ZNF385A  | 705436    |
| Zinc finger protein 410                                                | ZNF410   | 698124    |
| Zinc finger protein 436                                                | ZNF436   | 709638    |
| Zinc finger protein 460                                                | ZNF460   | 710080    |
| Zinc finger protein 462                                                | ZNF462   | 711489    |
| Zinc finger protein 484                                                | ZNF484   | 711976    |
| Zinc finger protein 496                                                | ZNF496   | 709694    |
| Zinc finger protein 521                                                | ZNF521   | 709169    |
| Zinc finger protein 593                                                | ZNF593   | 714086    |
| Zinc finger protein 595                                                | ZNF595   | 716693    |
| Zinc finger protein 608                                                | ZNF608   | 702182    |
| Zinc finger protein 620                                                | ZNF620   | 100423712 |
| Zinc finger protein 622                                                | ZNF622   | 100429384 |
| Zinc finger protein 627                                                | ZNF627   | 716820    |

|                                                 |          |           |
|-------------------------------------------------|----------|-----------|
| Zinc finger protein 638                         | ZNF638   | 704418    |
| Zinc finger protein 646                         | ZNF646   | 712774    |
| Zinc finger protein 653                         | ZNF653   | 714754    |
| Zinc finger protein 664                         | ZNF664   | 710703    |
| Zinc finger protein 684                         | ZNF684   | 695691    |
| Zinc finger protein 687                         | ZNF687   | 716590    |
| Zinc finger protein 7                           | ZNF7     | 715735    |
| Zinc finger protein 777                         | ZNF777   | 711987    |
| Zinc finger protein 804B                        | ZNF804B  | 704561    |
| Zinc finger protein 92                          | ZNF92    | 708683    |
| Zinc finger RNA binding protein                 | ZFR      | 696882    |
| Zinc finger with UFM1-specific peptidase domain | ZUFSP    | 718059    |
| Zinc finger, AN1-type domain 2A                 | ZFAND2A  | 100426344 |
| Zinc finger, AN1-type domain 3                  | ZFAND3   | 719346    |
| Zinc finger, AN1-type domain 4                  | ZFAND4   | 708136    |
| Zinc finger, C3H1-type containing               | ZFC3H1   | 718671    |
| Zinc finger, CCHC domain containing 11          | ZCCHC11  | 713406    |
| Zinc finger, CCHC domain containing 14          | ZCCHC14  | 703833    |
| Zinc finger, CCHC domain containing 17          | ZCCHC17  | 705172    |
| Zinc finger, CCHC domain containing 6           | ZCCHC6   | 693660    |
| Zinc finger, CCHC domain containing 7           | ZCCHC7   | 716658    |
| Zinc finger, CCHC domain containing 8           | ZCCHC8   | 702359    |
| Zinc finger, DHHC-type containing 12            | ZDHHC12  | 722606    |
| Zinc finger, DHHC-type containing 16            | ZDHHC16  | 705982    |
| Zinc finger, matrin-type 2                      | ZMAT2    | 697247    |
| Zinc finger, matrin-type 5                      | ZMAT5    | 715058    |
| Zinc finger, MYM-type 2                         | ZMYM2    | 721255    |
| Zinc finger, MYM-type 3                         | ZMYM3    | 697147    |
| Zinc finger, MYND-type containing 11            | ZMYND11  | 708761    |
| Zinc finger, RAN-binding domain containing 2    | ZRANB2   | 703513    |
| Zinc metalloproteinase STE24                    | ZMPSTE24 | 693765    |
| Zona pellucida glycoprotein 3 (sperm receptor)  | ZP3      | 719925    |
| Zyxin                                           | ZYX      | 706407    |

---

**(2) Expressed in both groups 2a and 2b, not in group 2c**

|                                                  |        |        |
|--------------------------------------------------|--------|--------|
| 1-acylglycerol-3-phosphate O-acyltransferase 1   | AGPAT1 | 717174 |
| 1-acylglycerol-3-phosphate O-acyltransferase 5   | AGPAT5 | 716847 |
| 2,4-dienoyl-coa reductase 1, mitochondrial       | DECR1  | 696035 |
| 2-phosphoxylose phosphatase 1                    | PXYLP1 | 715229 |
| 3-hydroxyacyl-coa dehydratase 1                  | HACD1  | 700635 |
| 3-hydroxyacyl-coa dehydratase 3                  | HACD3  | 709590 |
| 3-hydroxyanthranilate 3,4-dioxygenase            | HAAO   | 713101 |
| 3-hydroxybutyrate dehydrogenase, type 2          | BDH2   | 711108 |
| 3-oxoacyl-ACP synthase, mitochondrial            | OXSM   | 703382 |
| 3'-phosphoadenosine 5'-phosphosulfate synthase 1 | PAPSS1 | 695099 |
| 3'-phosphoadenosine 5'-phosphosulfate synthase 2 | PAPSS2 | 704688 |

|                                                                                     |         |           |
|-------------------------------------------------------------------------------------|---------|-----------|
| 5'-3' exoribonuclease 2                                                             | XRN2    | 700934    |
| 5-aminoimidazole-4-carboxamide ribonucleotide formyltransferase /IMP cyclohydrolase | ATIC    | 694819    |
| 5-hydroxymethylcytosine (hmc) binding, ES cell-specific                             | HMCEs   | 703524    |
| 5-hydroxytryptamine (serotonin) receptor 2B, G protein-coupled                      | HTR2B   | 711808    |
| 5'-nucleotidase, cytosolic IIIA                                                     | NT5C3A  | 708743    |
| 5-phosphohydroxy-L-lysine phospho-lyase                                             | PHYKPL  | 702302    |
| 8-oxoguanine DNA glycosylase                                                        | OGG1    | 700481    |
| Aarf domain containing kinase 1                                                     | ADCK1   | 707060    |
| Aarf domain containing kinase 3                                                     | ADCK3   | 697920    |
| Aarf domain containing kinase 5                                                     | ADCK5   | 100425840 |
| Abhydrolase domain containing 12                                                    | ABHD12  | 705915    |
| Abhydrolase domain containing 15                                                    | ABHD15  | 711493    |
| Abhydrolase domain containing 17A                                                   | ABHD17A | 709119    |
| Abhydrolase domain containing 8                                                     | ABHD8   | 718980    |
| ABI family member 3                                                                 | ABI3    | 698710    |
| Abl-interactor 1                                                                    | ABI1    | 707698    |
| Abl-interactor 2                                                                    | ABI2    | 704956    |
| Absent in melanoma 1                                                                | AIM1    | 697117    |
| Acetyl-coa acetyltransferase 1                                                      | ACAT1   | 707653    |
| Acetyl-coa acyltransferase 1                                                        | ACAA1   | 696743    |
| Acetyl-coa acyltransferase 2                                                        | ACAA2   | 709350    |
| Acetyl-coa carboxylase alpha                                                        | ACACA   | 714218    |
| Acid sensing ion channel subunit 1                                                  | ASIC1   | 713320    |
| Acid sensing ion channel subunit 2                                                  | ASIC2   | 718204    |
| Acidic nuclear phosphoprotein 32 family member B                                    | ANP32B  | 715508    |
| Acidic residue methyltransferase 1                                                  | ARMT1   | 704570    |
| Aconitase 1                                                                         | ACO1    | 705075    |
| Aconitase 2                                                                         | ACO2    | 707441    |
| Actin binding LIM protein 1                                                         | ABLIM1  | 698641    |
| Actin like 7B                                                                       | ACTL7B  | 710750    |
| Actin related protein 2/3 complex subunit 1A                                        | ARPC1A  | 718635    |
| Actin related protein 2/3 complex subunit 2                                         | ARPC2   | 700536    |
| Actin related protein 2/3 complex subunit 3                                         | ARPC3   | 709199    |
| Activating signal cointegrator 1 complex subunit 2                                  | ASCC2   | 715117    |
| Activating transcription factor 4                                                   | ATF4    | 703965    |
| Activating transcription factor 6                                                   | ATF6    | 720056    |
| Activin A receptor type I                                                           | ACVR1   | 697935    |
| Activin A receptor type IIB                                                         | ACVR2B  | 696071    |
| Acylaminoacyl-peptide hydrolase                                                     | APEH    | 705948    |
| Acyl-coa binding domain containing 3                                                | ACBD3   | 699311    |
| Acyl-coa binding domain containing 4                                                | ACBD4   | 715963    |
| Acyl-coa binding domain containing 6                                                | ACBD6   | 716418    |
| Acyl-coa dehydrogenase, C-2 to C-3 short chain                                      | ACADS   | 698196    |
| Acyl-coa dehydrogenase, C-4 to C-12 straight chain                                  | ACADM   | 705168    |
| Acyl-coa dehydrogenase, long chain                                                  | ACADL   | 711485    |
| Acyl-coa oxidase 1, palmitoyl                                                       | ACOX1   | 705197    |
| Acyl-coa thioesterase 13                                                            | ACOT13  | 100335136 |

|                                                                 |          |           |
|-----------------------------------------------------------------|----------|-----------|
| ADAM metallopeptidase domain 19                                 | ADAM19   | 715164    |
| ADAM metallopeptidase domain 21                                 | ADAM21   | 715640    |
| ADAM metallopeptidase domain 32                                 | ADAM32   | 706797    |
| ADAM metallopeptidase with thrombospondin type 1 motif 14       | ADAMTS14 | 710154    |
| ADAM metallopeptidase with thrombospondin type 1 motif 3        | ADAMTS3  | 705473    |
| ADAM metallopeptidase with thrombospondin type 1 motif 6        | ADAMTS6  | 696021    |
| ADAM metallopeptidase with thrombospondin type 1 motif 9        | ADAMTS9  | 698341    |
| ADAMTS like 2                                                   | ADAMTSL2 | 713492    |
| Adaptor related protein complex 1 associated regulatory protein | APIAR    | 700734    |
| Adaptor related protein complex 1 sigma 1 subunit               | AP1S1    | 719569    |
| Adaptor related protein complex 2 sigma 1 subunit               | AP2S1    | 716911    |
| Adaptor related protein complex 3, mu 1 subunit                 | AP3M1    | 705729    |
| Adaptor related protein complex 3, sigma 1 subunit              | AP3S1    | 696644    |
| Adaptor related protein complex 4, beta 1 subunit               | AP4B1    | 707634    |
| Adaptor related protein complex 4, mu 1 subunit                 | AP4M1    | 710944    |
| Additional sex combs like 2, transcriptional regulator          | ASXL2    | 695057    |
| Adducin 1                                                       | ADD1     | 700805    |
| Adducin 3                                                       | ADD3     | 677712    |
| Adenine phosphoribosyltransferase                               | APRT     | 697715    |
| Adenomatosis polyposis coli down-regulated 1                    | APCDD1   | 722280    |
| Adenosine deaminase domain containing 2                         | ADAD2    | 715076    |
| Adenosine monophosphate deaminase 2                             | AMPD2    | 699561    |
| Adenylate cyclase 4                                             | ADCY4    | 714684    |
| Adenylate cyclase 6                                             | ADCY6    | 707978    |
| Adenylate kinase 2                                              | AK2      | 709737    |
| Adenylate kinase 3                                              | AK3      | 694714    |
| Adenylate kinase 4                                              | AK4      | 698560    |
| Adenylate kinase 7                                              | AK7      | 704250    |
| Adenylosuccinate synthase                                       | ADSS     | 713580    |
| Adhesion G protein-coupled receptor A3                          | ADGRA3   | 715618    |
| Adhesion G protein-coupled receptor E5                          | ADGRE5   | 100426360 |
| Adhesion G protein-coupled receptor L2                          | ADGRL2   | 708998    |
| Adhesion molecule with Ig-like domain 1                         | AMIGO1   | 698932    |
| Adipogenesis regulatory factor                                  | ADIRF    | 699173    |
| Adiponectin receptor 2                                          | ADIPOR2  | 707547    |
| ADNP homeobox 2                                                 | ADNP2    | 718342    |
| ADP ribosylation factor 4                                       | ARF4     | 703432    |
| ADP ribosylation factor guanine nucleotide exchange factor 1    | ARFGEF1  | 704359    |
| ADP ribosylation factor interacting protein 1                   | ARFIP1   | 697533    |
| ADP ribosylation factor like gtpase 10                          | ARL10    | 696524    |
| ADP ribosylation factor like gtpase 4A                          | ARL4A    | 693302    |
| ADP ribosylation factor like gtpase 5B                          | ARL5B    | 701595    |
| ADP ribosylation factor like gtpase 6                           | ARL6     | 696616    |
| ADP ribosylation factor like gtpase 6 interacting protein 5     | ARL6IP5  | 696360    |
| ADP ribosylation factor like gtpase 6 interacting protein 6     | ARL6IP6  | 695619    |
| ADP-ribose/CDP-alcohol diphosphatase, manganese-dependent       | ADPRM    | 717991    |
| ADP-ribosylhydrolase like 2                                     | ADPRHL2  | 712758    |
| ADP-ribosyltransferase 5                                        | ART5     | 574238    |

|                                                                                                                        |          |           |
|------------------------------------------------------------------------------------------------------------------------|----------|-----------|
| Adrenomedullin                                                                                                         | ADM      | 703305    |
| Aftiphilin                                                                                                             | AFTPH    | 696100    |
| AHA1, activator of heat shock 90kda protein ATPase homolog 1 (yeast)                                                   | AHSA1    | 706547    |
| Ajuba LIM protein                                                                                                      | AJUBA    | 712865    |
| A-kinase anchoring protein 14                                                                                          | AKAP14   | 694769    |
| A-kinase anchoring protein 2                                                                                           | AKAP2    | 709841    |
| A-kinase anchoring protein 8 like                                                                                      | AKAP8L   | 719202    |
| A-kinase anchoring protein 9                                                                                           | AKAP9    | 702970    |
| Aladin WD repeat nucleoporin                                                                                           | AAAS     | 719095    |
| Alanine--glyoxylate aminotransferase 2                                                                                 | AGXT2    | 699250    |
| Aldehyde dehydrogenase 1 family member A1                                                                              | ALDH1A1  | 702598    |
| Aldehyde dehydrogenase 1 family member A3                                                                              | ALDH1A3  | 694231    |
| Aldehyde dehydrogenase 18 family member A1                                                                             | ALDH18A1 | 703357    |
| Aldehyde dehydrogenase 6 family member A1                                                                              | ALDH6A1  | 698755    |
| Aldo-keto reductase family 1, member B1 (aldose reductase)                                                             | AKR1B1   | 705957    |
| Aldo-keto reductase family 1, member C1 (dihydrodiol dehydrogenase 1; 20-alpha (3-alpha)-hydroxysteroid dehydrogenase) | AKR1C1   | 711198    |
| Aldo-keto reductase family 1, member E2                                                                                | AKR1E2   | 711035    |
| ALG2, alpha-1,3/1,6-mannosyltransferase                                                                                | ALG2     | 714850    |
| ALG5, dolichyl-phosphate beta-glucosyltransferase                                                                      | ALG5     | 694836    |
| Alkb homolog 4, lysine demethylase                                                                                     | ALKBH4   | 715078    |
| Alkb homolog 5, RNA demethylase                                                                                        | ALKBH5   | 700205    |
| Alkb homolog 7                                                                                                         | ALKBH7   | 699343    |
| Allograft inflammatory factor 1                                                                                        | AIF1     | 574115    |
| All-trans retinoic acid induced differentiation factor                                                                 | ATRAID   | 699201    |
| Alpha- and gamma-adaptin binding protein                                                                               | AAGAB    | 711436    |
| Alpha kinase 1                                                                                                         | ALPK1    | 700993    |
| Alpha thalassemia/mental retardation syndrome X-linked                                                                 | ATRX     | 705735    |
| Alpha-2-glycoprotein 1, zinc-binding                                                                                   | AZGP1    | 710136    |
| Alpha-2-macroglobulin                                                                                                  | A2M      | 716834    |
| Alpha-defensin 1A                                                                                                      | MNP1A    | 574196    |
| Alpha-methylacyl-coa racemase                                                                                          | AMACR    | 698365    |
| Aminoacylase 3                                                                                                         | ACY3     | 711083    |
| Aminoadipate-semialdehyde dehydrogenase-phosphopantetheinyl transferase                                                | AASDHPPT | 100328984 |
| Aminoadipate-semialdehyde synthase                                                                                     | AASS     | 694594    |
| Aminomethyltransferase                                                                                                 | AMT      | 706515    |
| Aminopeptidase puromycin sensitive                                                                                     | NPEPPS   | 693995    |
| Amino-terminal enhancer of split                                                                                       | AES      | 712353    |
| Amphiphysin                                                                                                            | AMPH     | 704559    |
| Amylase, alpha 2B (pancreatic)                                                                                         | AMY2B    | 712893    |
| Amyloid beta (A4) precursor protein-binding, family B, member 1 (Fe65)                                                 | APBB1    | 712585    |
| Amyloid beta (A4) precursor protein-binding, family B, member 3                                                        | APBB3    | 698296    |
| Anaphase promoting complex subunit 15                                                                                  | ANAPC15  | 718333    |
| Anaphase promoting complex subunit 2                                                                                   | ANAPC2   | 706384    |



|                                                                     |          |           |
|---------------------------------------------------------------------|----------|-----------|
| Anaphase promoting complex subunit 4                                | ANAPC4   | 694006    |
| Ancient ubiquitous protein 1                                        | AUP1     | 710020    |
| Androgen-induced 1                                                  | AIG1     | 700988    |
| Angio associated migratory cell protein                             | AAMP     | 700763    |
| Angiopoietin like 5                                                 | ANGPTL5  | 702036    |
| Angiotensin II receptor-associated protein                          | AGTRAP   | 722746    |
| Ankyrin 2, neuronal                                                 | ANK2     | 702180    |
| Ankyrin 3, node of Ranvier (ankyrin G)                              | ANK3     | 699518    |
| Ankyrin repeat and IBR domain containing 1                          | ANKIB1   | 703273    |
| Ankyrin repeat and MYND domain containing 2                         | ANKMY2   | 709414    |
| Ankyrin repeat and SOCS box containing 12                           | ASB12    | 707931    |
| Ankyrin repeat domain 13 family member D                            | ANKRD13D | 721749    |
| Ankyrin repeat domain 2 (stretch responsive muscle)                 | ANKRD2   | 707097    |
| Ankyrin repeat domain 22                                            | ANKRD22  | 694240    |
| Ankyrin repeat domain 27                                            | ANKRD27  | 716232    |
| Ankyrin repeat domain 35                                            | ANKRD35  | 706961    |
| Ankyrin repeat domain 37                                            | ANKRD37  | 100426384 |
| Ankyrin repeat domain 46                                            | ANKRD46  | 705491    |
| Ankyrin repeat domain 50                                            | ANKRD50  | 709327    |
| Ankyrin repeat domain 6                                             | ANKRD6   | 701339    |
| Annexin A1                                                          | ANXA1    | 702946    |
| Annexin A11                                                         | ANXA11   | 707628    |
| Annexin A2                                                          | ANXA2    | 706240    |
| Annexin A3                                                          | ANXA3    | 697239    |
| Annexin A4                                                          | ANXA4    | 701433    |
| Annexin A7                                                          | ANXA7    | 707166    |
| Anoctamin 10                                                        | ANO10    | 715666    |
| Anoctamin 4                                                         | ANO4     | 695973    |
| Anterior gradient 2, protein disulphide isomerase family member     | AGR2     | 709127    |
| Anterior gradient 3, protein disulphide isomerase family member     | AGR3     | 714517    |
| Anti-Mullerian hormone receptor, type II                            | AMHR2    | 702822    |
| APEX nuclease (apurinic/apyrimidinic endonuclease) 2                | APEX2    | 702084    |
| APEX nuclease (multifunctional DNA repair enzyme) 1                 | APEX1    | 702757    |
| Aph-1 homolog A, gamma secretase subunit                            | APH1A    | 706483    |
| Aph-1 homolog B, gamma secretase subunit                            | APH1B    | 705718    |
| Apolipoprotein B mrna editing enzyme, catalytic polypeptide-like 3A | APOBEC3A | 721030    |
| Apolipoprotein B mrna editing enzyme, catalytic polypeptide-like 3C | APOBEC3C | 705870    |
| Apolipoprotein B mrna editing enzyme, catalytic polypeptide-like 3G | APOBEC3G | 574398    |
| Apolipoprotein B mrna editing enzyme, catalytic polypeptide-like 3H | APOBEC3H | 723811    |
| Apolipoprotein B receptor                                           | APOBR    | 705950    |
| Apolipoprotein O                                                    | APOO     | 698137    |
| Apoptosis inducing factor, mitochondria associated 1                | AIFM1    | 702773    |
| Apoptosis inducing factor, mitochondria associated 3                | AIFM3    | 100430576 |
| Apoptosis inhibitor 5                                               | API5     | 716346    |

|                                                                 |         |        |
|-----------------------------------------------------------------|---------|--------|
| Arachidonate 12-lipoxygenase, 12R type                          | ALOX12B | 721936 |
| Arachidonate 5-lipoxygenase-activating protein                  | ALOX5AP | 713170 |
| Arachidonate lipoxygenase 3                                     | ALOXE3  | 716840 |
| Aralkylamine N-acetyltransferase                                | AANAT   | 706924 |
| Arfgap with gtpase domain, ankyrin repeat and PH domain 1       | AGAP1   | 693652 |
| Arfgap with rhogap domain, ankyrin repeat and PH domain 2       | ARAP2   | 702115 |
| Arfgap with SH3 domain, ankyrin repeat and PH domain 1          | ASAP1   | 695681 |
| Arginine and glutamate rich 1                                   | ARGLU1  | 702840 |
| Arginine/serine-rich coiled-coil 1                              | RSRC1   | 704232 |
| Arginine/serine-rich protein 1                                  | RSRP1   | 712757 |
| Arginine-glutamic acid dipeptide (RE) repeats                   | RERE    | 708902 |
| Arginyltransferase 1                                            | ATE1    | 705248 |
| Arginyl-trna synthetase                                         | RARS    | 698998 |
| Arginyl-trna synthetase 2, mitochondrial                        | RARS2   | 699240 |
| Argonaute 4, RISC catalytic component                           | AGO4    | 713134 |
| Armadillo repeat containing 3                                   | ARMC3   | 705015 |
| Armadillo repeat containing 5                                   | ARMC5   | 715103 |
| Armadillo repeat containing 8                                   | ARMC8   | 716388 |
| Armadillo repeat containing 9                                   | ARMC9   | 711891 |
| Armadillo repeat containing, X-linked 2                         | ARMCX2  | 704263 |
| Armadillo repeat gene deleted in velocardiofacial syndrome      | ARVCF   | 712399 |
| ARP1 actin-related protein 1 homolog B, centractin beta (yeast) | ACTR1B  | 707328 |
| ARP2 actin-related protein 2 homolog (yeast)                    | ACTR2   | 697080 |
| ARP5 actin-related protein 5 homolog (yeast)                    | ACTR5   | 698191 |
| Arrestin domain containing 3                                    | ARRDC3  | 695903 |
| Arrestin domain containing 4                                    | ARRDC4  | 708023 |
| Arrestin, beta 2                                                | ARRB2   | 709399 |
| Arsa arsenite transporter, ATP-binding, homolog 1 (bacterial)   | ASNA1   | 717734 |
| Artemin                                                         | ARTN    | 701641 |
| ARV1 homolog, fatty acid homeostasis modulator                  | ARV1    | 713975 |
| Aryl hydrocarbon receptor nuclear translocator like             | ARNTL   | 700464 |
| Arylsulfatase A                                                 | ARSA    | 716500 |
| Arylsulfatase E (chondrodysplasia punctata 1)                   | ARSE    | 720575 |
| Asparagine synthetase domain containing 1                       | ASNSD1  | 709388 |
| Aspartate beta-hydroxylase                                      | ASPH    | 699884 |
| Aspartate beta-hydroxylase domain containing 1                  | ASPHD1  | 707467 |
| Aspartate dehydrogenase domain containing                       | ASPDH   | 719609 |
| Aspartoacylase                                                  | ASPA    | 706170 |
| Aspartyl aminopeptidase                                         | DNPEP   | 703180 |
| Asteroid homolog 1 (Drosophila)                                 | ASTE1   | 719271 |
| Astrotactin 1                                                   | ASTN1   | 709094 |
| Ataxin 10                                                       | ATXN10  | 713805 |
| Ataxin 2-like                                                   | ATXN2L  | 708359 |
| AT-hook containing transcription factor 1                       | AHCTF1  | 702705 |
| Atlastin gtpase 1                                               | ATL1    | 706313 |
| ATP binding cassette subfamily A member 1                       | ABCA1   | 716146 |
| ATP binding cassette subfamily A member 4                       | ABCA4   | 714054 |
| ATP binding cassette subfamily A member 5                       | ABCA5   | 693795 |

|                                                                                                      |          |           |
|------------------------------------------------------------------------------------------------------|----------|-----------|
| ATP binding cassette subfamily B member 10                                                           | ABCB10   | 574117    |
| ATP binding cassette subfamily B member 7                                                            | ABCB7    | 704034    |
| ATP binding cassette subfamily C member 5                                                            | ABCC5    | 704326    |
| ATP binding cassette subfamily C member 8                                                            | ABCC8    | 654490    |
| ATP binding cassette subfamily D member 1                                                            | ABCD1    | 696794    |
| ATP binding cassette subfamily E member 1                                                            | ABCE1    | 701945    |
| ATP binding cassette subfamily G member 2 (Junior blood group)                                       | ABCG2    | 574307    |
| ATP citrate lyase                                                                                    | ACLY     | 708501    |
| ATP synthase F0 subunit 6                                                                            | ATP6     | 2846629   |
| ATP synthase, H <sup>+</sup> transporting, mitochondrial F1 complex, alpha subunit 1, cardiac muscle | ATP5A1   | 701389    |
| ATP synthase, H <sup>+</sup> transporting, mitochondrial F1 complex, beta polypeptide                | ATP5B    | 713284    |
| ATP synthase, H <sup>+</sup> transporting, mitochondrial F1 complex, delta subunit                   | ATP5D    | 705944    |
| ATP synthase, H <sup>+</sup> transporting, mitochondrial F1 complex, gamma polypeptide 1             | ATP5C1   | 713768    |
| ATP synthase, H <sup>+</sup> transporting, mitochondrial F1 complex, O subunit                       | ATP5O    | 698480    |
| ATP synthase, H <sup>+</sup> transporting, mitochondrial Fo complex subunit C1 (subunit 9)           | ATP5G1   | 697950    |
| ATP synthase, H <sup>+</sup> transporting, mitochondrial Fo complex subunit C2 (subunit 9)           | ATP5G2   | 703751    |
| ATP synthase, H <sup>+</sup> transporting, mitochondrial Fo complex subunit D                        | ATP5H    | 700338    |
| ATP synthase, H <sup>+</sup> transporting, mitochondrial Fo complex subunit F6                       | ATP5J    | 708411    |
| ATPase family, AAA domain containing 1                                                               | ATAD1    | 704809    |
| ATPase family, AAA domain containing 2                                                               | ATAD2    | 704478    |
| ATPase inhibitory factor 1                                                                           | ATPIF1   | 716870    |
| ATPase type 13A1                                                                                     | ATP13A1  | 100427504 |
| ATPase type 13A2                                                                                     | ATP13A2  | 699678    |
| ATPase, aminophospholipid transporter (APLT), class I, type 8A, member 1                             | ATP8A1   | 702630    |
| ATPase, Ca <sup>++</sup> transporting, plasma membrane 1                                             | ATP2B1   | 709102    |
| ATPase, Ca <sup>++</sup> transporting, type 2C, member 1                                             | ATP2C1   | 719281    |
| ATPase, class II, type 9A                                                                            | ATP9A    | 710250    |
| ATPase, H <sup>+</sup> transporting V0 subunit e2                                                    | ATP6V0E2 | 712644    |
| ATPase, H <sup>+</sup> transporting, lysosomal 14kda, V1 subunit F                                   | ATP6V1F  | 702112    |
| ATPase, H <sup>+</sup> transporting, lysosomal 21kda, V0 subunit b                                   | ATP6V0B  | 702243    |
| ATPase, H <sup>+</sup> transporting, lysosomal 31kda, V1 subunit E1                                  | ATP6V1E1 | 709739    |
| ATPase, H <sup>+</sup> transporting, lysosomal 9kda, V0 subunit e1                                   | ATP6V0E1 | 703342    |
| ATPase, H <sup>+</sup> transporting, lysosomal accessory protein 2                                   | ATP6AP2  | 705048    |
| ATPase, H <sup>+</sup> /K <sup>+</sup> exchanging, alpha polypeptide                                 | ATP4A    | 100426216 |
| ATPase, Na <sup>+</sup> /K <sup>+</sup> transporting, alpha 1 polypeptide                            | ATP1A1   | 710368    |
| ATR interacting protein                                                                              | ATRIP    | 710035    |
| ATR serine/threonine kinase                                                                          | ATR      | 714443    |

|                                                      |          |        |
|------------------------------------------------------|----------|--------|
| AT-rich interaction domain 2                         | ARID2    | 703823 |
| AT-rich interaction domain 3A                        | ARID3A   | 704435 |
| AT-rich interaction domain 4B                        | ARID4B   | 718320 |
| Atypical chemokine receptor 4                        | ACKR4    | 717701 |
| AU RNA binding protein/enoyl-coa hydratase           | AUH      | 704542 |
| Aurora kinase A interacting protein 1                | AURKAIP1 | 706329 |
| Aurora kinase B                                      | AURKB    | 721955 |
| Aurora kinase C                                      | AURKC    | 709801 |
| Autoimmune regulator                                 | AIRE     | 712858 |
| Autophagy related 16 like 1                          | ATG16L1  | 714092 |
| Autophagy related 16 like 2                          | ATG16L2  | 717952 |
| Autophagy related 2A                                 | ATG2A    | 717290 |
| Autophagy related 3                                  | ATG3     | 708305 |
| Autophagy related 4A, cysteine peptidase             | ATG4A    | 703367 |
| Autophagy related 4C, cysteine peptidase             | ATG4C    | 695606 |
| Autophagy related 4D, cysteine peptidase             | ATG4D    | 713111 |
| Autophagy related 5                                  | ATG5     | 696874 |
| Autophagy related 7                                  | ATG7     | 696238 |
| Autophagy/beclin-1 regulator 1                       | AMBRA1   | 714434 |
| B9 protein domain 2                                  | B9D2     | 704873 |
| Baculoviral IAP repeat containing 3                  | BIRC3    | 702468 |
| BAI1-associated protein 2-like 2                     | BAIAP2L2 | 700058 |
| Bardet-Biedl syndrome 12                             | BBS12    | 710538 |
| Bardet-Biedl syndrome 4                              | BBS4     | 704508 |
| Bardet-Biedl syndrome 5                              | BBS5     | 709701 |
| Basic helix-loop-helix domain containing, class B, 9 | BHLHB9   | 694634 |
| Basic leucine zipper and W2 domains 2                | BZW2     | 714627 |
| Basic leucine zipper transcription factor, ATF-like  | BATF     | 702646 |
| Basic transcription factor 3                         | BTF3     | 703339 |
| B-cell CLL/lymphoma 2                                | BCL2     | 707407 |
| B-cell CLL/lymphoma 6                                | BCL6     | 708736 |
| B-cell CLL/lymphoma 7B                               | BCL7B    | 716470 |
| B-cell CLL/lymphoma 7C                               | BCL7C    | 712065 |
| B-cell CLL/lymphoma 9                                | BCL9     | 700800 |
| B-cell linker                                        | BLNK     | 704363 |
| B-cell scaffold protein with ankyrin repeats 1       | BANK1    | 710040 |
| B-cell translocation gene 1, anti-proliferative      | BTG1     | 710112 |
| BCL2 associated athanogene 2                         | BAG2     | 712778 |
| BCL2 associated athanogene 3                         | BAG3     | 714420 |
| BCL2 associated athanogene 4                         | BAG4     | 703953 |
| BCL2/adenovirus E1B 19kda interacting protein 1      | BNIP1    | 703576 |
| BCL2/adenovirus E1B 19kda interacting protein 2      | BNIP2    | 703234 |
| BCL2-associated X protein                            | BAX      | 718948 |
| BCS1-like (S. Cerevisiae)                            | BCS1L    | 699690 |
| Beclin 1, autophagy related                          | BECN1    | 711649 |
| BEN domain containing 5                              | BEND5    | 711150 |
| BEN domain containing 6                              | BEND6    | 712498 |
| Bestrophin 1                                         | BEST1    | 718993 |

|                                                                         |          |        |
|-------------------------------------------------------------------------|----------|--------|
| Beta 3-glucosyltransferase                                              | B3GLCT   | 713498 |
| Beta-1,3-glucuronyltransferase 2                                        | B3GAT2   | 717157 |
| Beta-1,3-glucuronyltransferase 3                                        | B3GAT3   | 718744 |
| Beta-1,3-N-acetylgalactosaminyltransferase 1 (globoside blood group)    | B3GALNT1 | 703939 |
| Beta-1,4-N-acetyl-galactosaminyl transferase 1                          | B4GALNT1 | 715317 |
| Beta-2-microglobulin                                                    | B2M      | 712428 |
| Beta-site APP-cleaving enzyme 1                                         | BACE1    | 697694 |
| Bicaudal D homolog 2 (Drosophila)                                       | BICD2    | 706621 |
| Bisphosphoglycerate mutase                                              | BPGM     | 706741 |
| BLOC-1 related complex subunit 5                                        | BORCS5   | 696469 |
| Bloom syndrome, recq helicase-like                                      | BLM      | 703460 |
| BMP and activin membrane-bound inhibitor                                | BAMBI    | 710152 |
| Bola family member 1                                                    | BOLA1    | 705297 |
| Bola family member 3                                                    | BOLA3    | 707871 |
| Bone morphogenetic protein 1                                            | BMP1     | 707596 |
| Bone morphogenetic protein 4                                            | BMP4     | 694618 |
| Bone morphogenetic protein 7                                            | BMP7     | 696948 |
| Bone morphogenetic protein receptor type IA                             | BMPR1A   | 696898 |
| Bone morphogenetic protein/retinoic acid inducible neural -specific 1   | BRINP1   | 701794 |
| Bora, aurora kinase A activator                                         | BORA     | 693798 |
| BPI fold containing family A member 2                                   | BPIFA2   | 710376 |
| Brain protein I3                                                        | BRI3     | 706525 |
| Brain-derived neurotrophic factor                                       | BDNF     | 701245 |
| Branched chain amino-acid transaminase 2, mitochondrial                 | BCAT2    | 718305 |
| Branched chain keto acid dehydrogenase E1, beta polypeptide             | BCKDHB   | 718472 |
| Branched chain ketoacid dehydrogenase kinase                            | BCKDK    | 712985 |
| BRCA1 associated RING domain 1                                          | BARD1    | 694301 |
| Breast cancer metastasis suppressor 1                                   | BRMS1    | 714212 |
| Breast cancer metastasis-suppressor 1-like                              | BRMS1L   | 695909 |
| Breast carcinoma amplified sequence 3                                   | BCAS3    | 712846 |
| BRF1, RNA polymerase III transcription initiation factor 90 kda subunit | BRF1     | 709533 |
| BRISC and BRCA1 A complex member 1                                      | BABAM1   | 718969 |
| Bromo adjacent homology domain containing 1                             | BAHD1    | 702982 |
| Bromodomain adjacent to zinc finger domain 1B                           | BAZ1B    | 716436 |
| Bromodomain containing 1                                                | BRD1     | 715059 |
| Bromodomain containing 2                                                | BRD2     | 717893 |
| Bromodomain containing 7                                                | BRD7     | 694850 |
| BTB (POZ) domain containing 1                                           | BTBD1    | 718696 |
| BTB and CNC homology 1, basic leucine zipper transcription factor 1     | BACH1    | 705817 |
| BTG family member 3                                                     | BTG3     | 710579 |
| BTG3 associated nuclear protein                                         | BANP     | 696125 |
| BUB3 mitotic checkpoint protein                                         | BUB3     | 708033 |
| BUD31 homolog                                                           | BUD31    | 718694 |
| Bystin like                                                             | BYSL     | 694976 |

|                                                                                |           |           |
|--------------------------------------------------------------------------------|-----------|-----------|
| C1GALT1 specific chaperone 1                                                   | C1GALT1C1 | 696662    |
| C2 calcium-dependent domain containing 3                                       | C2CD3     | 718842    |
| C2CD2-like                                                                     | C2CD2L    | 703424    |
| C3 and PZP-like, alpha-2-macroglobulin domain containing 8                     | CPAMD8    | 719660    |
| Cadherin 11, type 2, OB-cadherin (osteoblast)                                  | CDH11     | 708826    |
| Cadherin 13                                                                    | CDH13     | 718038    |
| Cadherin 2, type 1, N-cadherin (neuronal)                                      | CDH2      | 711526    |
| Cadherin 24, type 2                                                            | CDH24     | 713241    |
| Cadherin 5, type 2 (vascular endothelium)                                      | CDH5      | 693297    |
| Cadherin related family member 2                                               | CDHR2     | 697249    |
| Calcitonin-related polypeptide alpha                                           | CALCA     | 700649    |
| Calcium and integrin binding family member 2                                   | CIB2      | 709429    |
| Calcium and integrin binding family member 3                                   | CIB3      | 718586    |
| Calcium binding protein 39                                                     | CAB39     | 711166    |
| Calcium binding protein 5                                                      | CABP5     | 718484    |
| Calcium binding tyrosine-(Y)-phosphorylation regulated                         | CABYR     | 701670    |
| Calcium channel, voltage-dependent, beta 2 subunit                             | CACNB2    | 701226    |
| Calcium channel, voltage-dependent, beta subunit associated regulatory protein | CBARP     | 721208    |
| Calcium channel, voltage-dependent, gamma subunit 2                            | CACNG2    | 696294    |
| Calcium homeostasis endoplasmic reticulum protein                              | CHERP     | 718689    |
| Calcium regulated heat stable protein 1                                        | CARHSP1   | 709224    |
| Calcium/calmodulin-dependent protein kinase II delta                           | CAMK2D    | 702504    |
| Calcium/calmodulin-dependent protein kinase II gamma                           | CAMK2G    | 705980    |
| Calcium/calmodulin-dependent protein kinase II inhibitor 1                     | CAMK2N1   | 705302    |
| Calcium/calmodulin-dependent protein kinase kinase 2, beta                     | CAMKK2    | 699685    |
| Calcyclin binding protein                                                      | CACYBP    | 709343    |
| Calcyon neuron-specific vesicular protein                                      | CALY      | 702415    |
| Calmegin                                                                       | CLGN      | 698361    |
| Calmin (calponin-like, transmembrane)                                          | CLMN      | 709910    |
| Calmodulin like 6                                                              | CALML6    | 703514    |
| Calmodulin regulated spectrin associated protein family member 2               | CAMSAP2   | 709092    |
| Calnexin                                                                       | CANX      | 704794    |
| Calpain 10                                                                     | CAPN10    | 716360    |
| Calpain 15                                                                     | CAPN15    | 695881    |
| Calpain 2, (m/II) large subunit                                                | CAPN2     | 703047    |
| Calpain 3                                                                      | CAPN3     | 707913    |
| Calpain 6                                                                      | CAPN6     | 706434    |
| Calreticulin                                                                   | CALR      | 716910    |
| Camp responsive element binding protein 3                                      | CREB3     | 696350    |
| Camp responsive element binding protein 3-like 4                               | CREB3L4   | 715951    |
| Canopy FGF signaling regulator 3                                               | CNPY3     | 100424672 |
| Cap methyltransferase 2                                                        | CMTR2     | 711529    |
| CAP, adenylate cyclase-associated protein 1 (yeast)                            | CAP1      | 693719    |
| CAP, adenylate cyclase-associated protein, 2 (yeast)                           | CAP2      | 703445    |
| CAP-Gly domain containing linker protein 3                                     | CLIP3     | 712058    |
| CAP-Gly domain containing linker protein family member 4                       | CLIP4     | 704092    |

|                                                                                         |          |           |
|-----------------------------------------------------------------------------------------|----------|-----------|
| Capping protein (actin filament) muscle Z-line, alpha 1                                 | CAPZA1   | 705653    |
| Capping protein (actin filament) muscle Z-line, alpha 2                                 | CAPZA2   | 704662    |
| Capping protein (actin filament), gelsolin-like                                         | CAPG     | 695288    |
| Caprin family member 2                                                                  | CAPRIN2  | 693594    |
| Carbamoyl-phosphate synthetase 2, aspartate trans<br>carbamylase,<br>and dihydroorotase | CAD      | 699460    |
| Carbohydrate (chondroitin 4) sulfotransferase 13                                        | CHST13   | 716548    |
| Carbohydrate (keratan sulfate Gal-6) sulfotransferase 1                                 | CHST1    | 715176    |
| Carbohydrate (N-acetylgalactosamine 4-O) sulfotransferase 14                            | CHST14   | 703115    |
| Carbohydrate (N-acetylgalactosamine 4-sulfate 6-O) sulfo<br>transferase 15              | CHST15   | 693845    |
| Carbohydrate (N-acetylglucosamine 6-O) sulfotransferase 7                               | CHST7    | 704906    |
| Carbonic anhydrase II                                                                   | CA2      | 574263    |
| Carbonic anhydrase IX                                                                   | CA9      | 696729    |
| Carbonyl reductase 3                                                                    | CBR3     | 695769    |
| Carboxypeptidase A5                                                                     | CPA5     | 702974    |
| Carboxypeptidase E                                                                      | CPE      | 708881    |
| Carboxypeptidase N subunit 2                                                            | CPN2     | 106997192 |
| Carboxypeptidase Q                                                                      | CPQ      | 701711    |
| Carboxypeptidase X (M14 family), member 2                                               | CPXM2    | 693465    |
| Carboxypeptidase, vitellogenic-like                                                     | CPVL     | 697111    |
| Cardiotrophin 1                                                                         | CTF1     | 713850    |
| Carnitine O-acetyltransferase                                                           | CRAT     | 716908    |
| Carnitine palmitoyltransferase 1B                                                       | CPT1B    | 720697    |
| Carnosine dipeptidase 1 (metallopeptidase M20 family)                                   | CNDP1    | 695195    |
| Cartilage acidic protein 1                                                              | CRTAC1   | 707486    |
| Casein kinase 1, alpha 1                                                                | CSNK1A1  | 710775    |
| Casein kinase 2, alpha 1 polypeptide                                                    | CSNK2A1  | 714841    |
| Casein kinase 2, beta polypeptide                                                       | CSNK2B   | 715807    |
| CASK interacting protein 2                                                              | CASKIN2  | 702477    |
| CASP2 and RIPK1 domain containing adaptor with death<br>domain                          | CRADD    | 711165    |
| Caspase 1                                                                               | CASP1    | 706568    |
| Caspase 4                                                                               | CASP4    | 704864    |
| Caspase 9                                                                               | CASP9    | 694544    |
| Caspase activity and apoptosis inhibitor 1                                              | CAAP1    | 707992    |
| Caspase recruitment domain family member 9                                              | CARD9    | 710485    |
| Cat eye syndrome chromosome region, candidate 5                                         | CECR5    | 709197    |
| Catalase                                                                                | CAT      | 717406    |
| Catechol-O-methyltransferase                                                            | COMT     | 712548    |
| Catenin alpha 1                                                                         | CTNNA1   | 574385    |
| Catenin alpha 2                                                                         | CTNNA2   | 712135    |
| Catenin alpha-like 1                                                                    | CTNNAL1  | 710389    |
| Catenin beta interacting protein 1                                                      | CTNNBIP1 | 712257    |
| Catenin beta like 1                                                                     | CTNNBL1  | 700310    |
| Catenin delta 1                                                                         | CTNND1   | 704212    |
| Cathelicidin antimicrobial peptide                                                      | CAMP     | 619186    |

|                                                                                   |          |           |
|-----------------------------------------------------------------------------------|----------|-----------|
| Cathepsin A                                                                       | CTSA     | 708592    |
| Cathepsin B                                                                       | CTSB     | 100424760 |
| Cathepsin C                                                                       | CTSC     | 705320    |
| Cathepsin L                                                                       | CTSL     | 694569    |
| Cation channel, sperm associated 2                                                | CATSPER2 | 710876    |
| Cation channel, sperm associated 3                                                | CATSPER3 | 713905    |
| Catsper channel auxiliary subunit gamma                                           | CATSPERG | 714958    |
| Caudal type homeobox 4                                                            | CDX4     | 701374    |
| Caveolin 2                                                                        | CAV2     | 706980    |
| Cbl proto-oncogene B, E3 ubiquitin protein ligase                                 | CBLB     | 703879    |
| Cbl proto-oncogene-like 1, E3 ubiquitin protein ligase                            | CBL1     | 699980    |
| Cbp/p300-interacting transactivator, with Glu/Asp rich carboxy-terminal domain, 1 | CITED1   | 703165    |
| CCAAT/enhancer binding protein (C/EBP), zeta                                      | CEBPZ    | 712090    |
| CCR4-NOT transcription complex subunit 10                                         | CNOT10   | 704986    |
| CCR4-NOT transcription complex subunit 2                                          | CNOT2    | 718501    |
| CCR4-NOT transcription complex subunit 3                                          | CNOT3    | 693292    |
| CCR4-NOT transcription complex subunit 7                                          | CNOT7    | 702192    |
| CCR4-NOT transcription complex subunit 8                                          | CNOT8    | 714813    |
| CD19 molecule                                                                     | CD19     | 705211    |
| CD1c molecule                                                                     | CD1C     | 717148    |
| CD2 molecule                                                                      | CD2      | 677855    |
| CD200 molecule                                                                    | CD200    | 708110    |
| CD248 molecule, endosialin                                                        | CD248    | 714375    |
| CD274 molecule                                                                    | CD274    | 716043    |
| CD3e molecule, epsilon (CD3-TCR complex)                                          | CD3E     | 699467    |
| CD4 molecule                                                                      | CD4      | 713807    |
| CD40 molecule, TNF receptor superfamily member 5                                  | CD40     | 707749    |
| CD53 molecule                                                                     | CD53     | 702350    |
| CD63 molecule                                                                     | CD63     | 709828    |
| CD7 molecule                                                                      | CD7      | 719501    |
| CD79b molecule                                                                    | CD79B    | 718218    |
| CD81 molecule                                                                     | CD81     | 704961    |
| CD83 molecule                                                                     | CD83     | 701825    |
| CD9 molecule                                                                      | CD9      | 712262    |
| CDC like kinase 1                                                                 | CLK1     | 700320    |
| CDC like kinase 3                                                                 | CLK3     | 702511    |
| CDC28 protein kinase regulatory subunit 1B                                        | CKS1B    | 717164    |
| CDC28 protein kinase regulatory subunit 2                                         | CKS2     | 697324    |
| CDC42 small effector 2                                                            | CDC42SE2 | 708885    |
| CDKN2A interacting protein                                                        | CDKN2AIP | 701583    |
| Cell cycle and apoptosis regulator 2                                              | CCAR2    | 716288    |
| Cell death-inducing DFFA-like effector b                                          | CIDEB    | 100425328 |
| Cell division cycle 123                                                           | CDC123   | 694239    |
| Cell division cycle 16                                                            | CDC16    | 699089    |
| Cell division cycle 20                                                            | CDC20    | 702317    |
| Cell division cycle 23                                                            | CDC23    | 714000    |
| Cell division cycle 25C                                                           | CDC25C   | 714115    |



|                                                  |         |        |
|--------------------------------------------------|---------|--------|
| Cell division cycle 26                           | CDC26   | 706165 |
| Cell division cycle 37                           | CDC37   | 715390 |
| Cell division cycle 5 like                       | CDC5L   | 703099 |
| Cell division cycle 7                            | CDC7    | 704730 |
| Cell division cycle 73                           | CDC73   | 712256 |
| Cell division cycle and apoptosis regulator 1    | CCAR1   | 693585 |
| Cell division cycle associated 3                 | CDCA3   | 722088 |
| Cell division cycle associated 5                 | CDCA5   | 721998 |
| Cell division cycle associated 7                 | CDCA7   | 696474 |
| Cell division cycle associated 8                 | CDCA8   | 719808 |
| Cell growth regulator with ring finger domain 1  | CGRRF1  | 695231 |
| Cell wall biogenesis 43 C-terminal homolog       | CWH43   | 706415 |
| Centlein                                         | CNTLN   | 713456 |
| Centrin 2                                        | CETN2   | 693376 |
| Centrin 3                                        | CETN3   | 695223 |
| Centriolin                                       | CNTRL   | 700200 |
| Centrobin, centrosomal BRCA2 interacting protein | CNTROB  | 716660 |
| Centromere protein A                             | CENPA   | 697312 |
| Centromere protein C                             | CENPC   | 710620 |
| Centromere protein F                             | CENPF   | 709000 |
| Centromere protein J                             | CENPJ   | 721498 |
| Centromere protein M                             | CENPM   | 709006 |
| Centromere protein O                             | CENPO   | 693599 |
| Centrosomal protein 112kda                       | CEP112  | 718585 |
| Centrosomal protein 170kda                       | CEP170  | 705427 |
| Centrosomal protein 192kda                       | CEP192  | 722121 |
| Centrosomal protein 290kda                       | CEP290  | 708286 |
| Centrosomal protein 350kda                       | CEP350  | 716537 |
| Centrosomal protein 41kda                        | CEP41   | 703215 |
| Centrosomal protein 55kda                        | CEP55   | 699890 |
| Centrosomal protein 57kda-like 1                 | CEP57L1 | 700109 |
| Centrosomal protein 63kda                        | CEP63   | 717266 |
| Centrosomal protein 72kda                        | CEP72   | 708753 |
| Centrosomal protein 83kda                        | CEP83   | 711408 |
| Centrosomal protein 85kda                        | CEP85   | 714264 |
| Centrosomal protein 97kda                        | CEP97   | 702482 |
| Ceramide synthase 2                              | CERS2   | 716180 |
| Ceramide synthase 4                              | CERS4   | 706728 |
| Cerebellar degeneration related protein 2        | CDR2    | 698974 |
| Cerebellin 4 precursor                           | CBLN4   | 698567 |
| CGG triplet repeat binding protein 1             | CGGBP1  | 693920 |
| Chaperonin containing TCP1, subunit 2 (beta)     | CCT2    | 717182 |
| Chaperonin containing TCP1, subunit 8 (theta)    | CCT8    | 706184 |
| Charged multivesicular body protein 2A           | CHMP2A  | 712059 |
| Charged multivesicular body protein 4B           | CHMP4B  | 709004 |
| Charged multivesicular body protein 5            | CHMP5   | 703191 |
| Charged multivesicular body protein 6            | CHMP6   | 718353 |
| Checkpoint kinase 2                              | CHEK2   | 713668 |

|                                                         |              |           |
|---------------------------------------------------------|--------------|-----------|
| Chemokine (C-C motif) ligand 27                         | CCL27        | 574220    |
| Chemokine (C-X-C motif) receptor 4                      | CXCR4        | 707329    |
| Chemokine (C-X-C motif) receptor 5                      | CXCR5        | 701792    |
| Chemokine-like factor                                   | CKLF         | 693673    |
| Chitinase 3 like 2                                      | CHI3L2       | 705024    |
| Chitobiase, di-N-acetyl-                                | CTBS         | 710366    |
| Chloride channel, voltage-sensitive 2                   | CLCN2        | 704709    |
| Chloride channel, voltage-sensitive 6                   | CLCN6        | 714793    |
| Chloride intracellular channel 2                        | CLIC2        | 703475    |
| Chloride intracellular channel 4                        | CLIC4        | 712337    |
| Choline kinase beta                                     | CHKB         | 716377    |
| Choline/ethanolamine phosphotransferase 1               | CEPT1        | 702700    |
| Chondroitin polymerizing factor                         | CHPF         | 703860    |
| Chondroitin sulfate N-acetylgalactosaminyltransferase 2 | CSGALNACT2   | 703703    |
| Chordin                                                 | CHRD         | 702281    |
| Chromatin accessibility complex 1                       | CHRA1        | 700384    |
| Chromatin target of PRMT1                               | CHTOP        | 715501    |
| Chromobox 1                                             | CBX1         | 696673    |
| Chromobox 7                                             | CBX7         | 703056    |
| Chromodomain helicase DNA binding protein 1             | CHD1         | 702070    |
| Chromodomain helicase DNA binding protein 4             | CHD4         | 713162    |
| Chromodomain helicase DNA binding protein 9             | CHD9         | 696367    |
| Chromodomain protein, Y-like                            | CDYL         | 722957    |
| Chromosome 1 open reading frame, human c1orf123         | C1H1orf123   | 714201    |
| Chromosome 1 open reading frame, human c1orf198         | C1H1orf198   | 714084    |
| Chromosome 1 open reading frame, human c1orf35          | C1H1orf35    | 695723    |
| Chromosome 1 open reading frame, human c1orf50          | C1H1orf50    | 698058    |
| Chromosome 1 open reading frame, human c1orf52          | C1H1orf52    | 711232    |
| Chromosome 1 open reading frame, human c1orf54          | C1H1orf54    | 107000832 |
| Chromosome 1 open reading frame, human c1orf74          | C1H1orf74    | 713029    |
| Chromosome 1 open reading frame, human c1orf87          | C1H1orf87    | 693884    |
| Chromosome 10 open reading frame, human c20orf195       | C10H20orf195 | 696464    |
| Chromosome 10 open reading frame, human c20orf27        | C10H20orf27  | 717525    |
| Chromosome 10 open reading frame, human c20orf96        | C10H20orf96  | 714431    |
| Chromosome 10 open reading frame, human c22orf23        | C10H22orf23  | 699449    |
| Chromosome 11 open reading frame, human c12orf10        | C11H12orf10  | 702255    |
| Chromosome 11 open reading frame, human c12orf29        | C11H12orf29  | 708382    |
| Chromosome 11 open reading frame, human c12orf4         | C11H12orf4   | 710836    |
| Chromosome 11 open reading frame, human c12orf57        | C11H12orf57  | 714482    |
| Chromosome 12 open reading frame, human c2orf47         | C12H2orf47   | 699322    |
| Chromosome 13 open reading frame, human c2orf49         | C13H2orf49   | 713165    |
| Chromosome 14 open reading frame, human c11orf57        | C14H11orf57  | 711168    |
| Chromosome 14 open reading frame, human c11orf58        | C14H11orf58  | 697690    |
| Chromosome 14 open reading frame, human c11orf68        | C14H11orf68  | 715318    |
| Chromosome 14 open reading frame, human c11orf73        | C14H11orf73  | 704098    |
| Chromosome 14 open reading frame, human c11orf74        | C14H11orf74  | 716798    |
| Chromosome 15 open reading frame, human c9orf135        | C15H9orf135  | 700202    |
| Chromosome 15 open reading frame, human c9orf16         | C15H9orf16   | 722628    |

|                                                   |             |        |
|---------------------------------------------------|-------------|--------|
| Chromosome 15 open reading frame, human c9orf24   | C15H9orf24  | 701552 |
| Chromosome 16 open reading frame, human c17orf53  | C16H17orf53 | 711524 |
| Chromosome 16 open reading frame, human c17orf62  | C16H17orf62 | 716212 |
| Chromosome 18 open reading frame, human c18orf21  | C18H18orf21 | 715440 |
| Chromosome 19 open reading frame, human c19orf24  | C19H19orf24 | 706393 |
| Chromosome 19 open reading frame, human c19orf43  | C19H19orf43 | 716466 |
| Chromosome 19 open reading frame, human c19orf53  | C19H19orf53 | 720745 |
| Chromosome 2 open reading frame, human c3orf14    | C2H3orf14   | 699965 |
| Chromosome 2 open reading frame, human c3orf18    | C2H3orf18   | 701675 |
| Chromosome 2 open reading frame, human c3orf58    | C2H3orf58   | 713830 |
| Chromosome 20 open reading frame 24 ortholog      | C10H20orf24 | 709696 |
| Chromosome 20 open reading frame, human c16orf13  | C20H16orf13 | 696495 |
| Chromosome 20 open reading frame, human c16orf78  | C20H16orf78 | 693672 |
| Chromosome 20 open reading frame, human c16orf87  | C20H16orf87 | 716218 |
| Chromosome 3 open reading frame, human c21orf91   | C3H21orf91  | 710406 |
| Chromosome 3 open reading frame, human c7orf25    | C3H7orf25   | 708455 |
| Chromosome 4 open reading frame, human c6orf1     | C4H6orf1    | 718551 |
| Chromosome 4 open reading frame, human c6orf136   | C4H6orf136  | 712108 |
| Chromosome 4 open reading frame, human c6orf203   | C4H6orf203  | 698108 |
| Chromosome 4 open reading frame, human c6orf25    | C4H6orf25   | 716265 |
| Chromosome 4 open reading frame, human c6orf62    | C4H6orf62   | 708218 |
| Chromosome 4 open reading frame, human c6orf89    | C4H6orf89   | 719165 |
| Chromosome 5 open reading frame, human c4orf17    | C5H4orf17   | 708639 |
| Chromosome 5 open reading frame, human c4orf27    | C5H4orf27   | 694607 |
| Chromosome 6 open reading frame, human c5orf15    | C6H5orf15   | 709969 |
| Chromosome 6 open reading frame, human c5orf30    | C6H5orf30   | 703692 |
| Chromosome 7 open reading frame, human c14orf142  | C7H14orf142 | 704509 |
| Chromosome 7 open reading frame, human c14orf166  | C7H14orf166 | 710094 |
| Chromosome 7 open reading frame, human c15orf57   | C7H15orf57  | 703343 |
| Chromosome 8 open reading frame, human c8orf46    | C8H8orf46   | 703243 |
| Chromosome 8 open reading frame, human c8orf48    | C8H8orf48   | 700746 |
| Chromosome 8 open reading frame, human c8orf59    | C8H8orf59   | 703464 |
| Chromosome 8 open reading frame, human c8orf76    | C8H8orf76   | 704150 |
| Chromosome 9 open reading frame, human c10orf107  | C9H10orf107 | 700172 |
| Chromosome 9 open reading frame, human c10orf2    | C9H10orf2   | 710958 |
| Chromosome alignment maintaining phosphoprotein 1 | CHAMP1      | 699474 |
| Chromosome X open reading frame, human cxorf23    | CXHXorf23   | 696449 |
| Chromosome X open reading frame, human cxorf38    | CXHXorf38   | 699271 |
| Chromosome X open reading frame, human cxorf57    | CXHXorf57   | 700757 |
| Chymotrypsinogen B2                               | CTRB2       | 711100 |
| Cilia and flagella associated protein 100         | CFAP100     | 716433 |
| Cilia and flagella associated protein 161         | CFAP161     | 713184 |
| Cilia and flagella associated protein 43          | CFAP43      | 716031 |
| Cilia and flagella associated protein 52          | CFAP52      | 722040 |
| Cilia and flagella associated protein 53          | CFAP53      | 700084 |
| Cilia and flagella associated protein 65          | CFAP65      | 701296 |
| Ciliary neurotrophic factor                       | CNTF        | 701907 |
| Circadian associated repressor of transcription   | CIART       | 706693 |

|                                                          |         |        |
|----------------------------------------------------------|---------|--------|
| Citrate lyase beta like                                  | CLYBL   | 699339 |
| CKLF-like MARVEL transmembrane domain containing 3       | CMTM3   | 695592 |
| CKLF-like MARVEL transmembrane domain containing 7       | CMTM7   | 704329 |
| CKLF-like MARVEL transmembrane domain containing 8       | CMTM8   | 704234 |
| Clathrin, light chain A                                  | CLTA    | 693659 |
| Claudin 12                                               | CLDN12  | 704058 |
| Claudin 15                                               | CLDN15  | 719637 |
| Claudin 16                                               | CLDN16  | 704442 |
| Claudin 3                                                | CLDN3   | 716771 |
| Cleavage and polyadenylation factor I subunit 1          | CLP1    | 705071 |
| Cleavage and polyadenylation specific factor 1           | CPSF1   | 702082 |
| Cleavage and polyadenylation specific factor 4           | CPSF4   | 708119 |
| Cleavage stimulation factor, 3' pre-RNA, subunit 2       | CSTF2   | 701235 |
| Cleavage stimulation factor, 3' pre-RNA, subunit 3       | CSTF3   | 694040 |
| Cleft lip and palate associated transmembrane protein 1  | CLPTM1  | 718306 |
| Cms1 ribosomal small subunit homolog (yeast)             | CMSS1   | 699717 |
| Coagulation factor XII (Hageman factor)                  | F12     | 699875 |
| Coatomer protein complex subunit beta 1                  | COPB1   | 699327 |
| Coatomer protein complex subunit zeta 1                  | COPZ1   | 705176 |
| Codanin 1                                                | CDAN1   | 708838 |
| Coenzyme Q10A                                            | COQ10A  | 712341 |
| Coenzyme Q2 4-hydroxybenzoate polyprenyltransferase      | COQ2    | 707681 |
| Cofilin 1 (non-muscle)                                   | CFL1    | 721882 |
| Cofilin 2 (muscle)                                       | CFL2    | 693875 |
| Coiled-coil domain containing 106                        | CCDC106 | 702611 |
| Coiled-coil domain containing 12                         | CCDC12  | 712061 |
| Coiled-coil domain containing 121                        | CCDC121 | 702143 |
| Coiled-coil domain containing 134                        | CCDC134 | 708713 |
| Coiled-coil domain containing 136                        | CCDC136 | 701874 |
| Coiled-coil domain containing 146                        | CCDC146 | 694907 |
| Coiled-coil domain containing 151                        | CCDC151 | 714600 |
| Coiled-coil domain containing 17                         | CCDC17  | 706591 |
| Coiled-coil domain containing 174                        | CCDC174 | 701654 |
| Coiled-coil domain containing 181                        | CCDC181 | 700803 |
| Coiled-coil domain containing 186                        | CCDC186 | 722518 |
| Coiled-coil domain containing 191                        | CCDC191 | 710219 |
| Coiled-coil domain containing 28A                        | CCDC28A | 703104 |
| Coiled-coil domain containing 36                         | CCDC36  | 707136 |
| Coiled-coil domain containing 42                         | CCDC42  | 717532 |
| Coiled-coil domain containing 43                         | CCDC43  | 715325 |
| Coiled-coil domain containing 59                         | CCDC59  | 698443 |
| Coiled-coil domain containing 85B                        | CCDC85B | 715413 |
| Coiled-coil domain containing 92                         | CCDC92  | 705922 |
| Coiled-coil domain containing 96                         | CCDC96  | 722716 |
| Coiled-coil domain containing 97                         | CCDC97  | 706342 |
| Coiled-coil serine rich protein 2                        | CCSER2  | 698006 |
| Coiled-coil-helix-coiled-coil-helix domain containing 10 | CHCHD10 | 720205 |
| Coiled-coil-helix-coiled-coil-helix domain containing 6  | CHCHD6  | 716767 |

|                                                                                    |         |           |
|------------------------------------------------------------------------------------|---------|-----------|
| Cold inducible RNA binding protein                                                 | CIRBP   | 706175    |
| Cold shock domain containing E1, RNA binding                                       | CSDE1   | 708897    |
| Collagen, type I, alpha 2                                                          | COL1A2  | 700359    |
| Collagen, type III, alpha 1                                                        | COL3A1  | 574131    |
| Collagen, type IX, alpha 1                                                         | COL9A1  | 714809    |
| Collagen, type VI, alpha 1                                                         | COL6A1  | 721855    |
| Collagen, type XII, alpha 1                                                        | COL12A1 | 717820    |
| Collagen, type XXIV, alpha 1                                                       | COL24A1 | 711713    |
| Colony stimulating factor 1 (macrophage)                                           | CSF1    | 702532    |
| Colony stimulating factor 3                                                        | CSF3    | 698961    |
| Colony stimulating factor 3 receptor                                               | CSF3R   | 713485    |
| COMM domain containing 2                                                           | COMMD2  | 711498    |
| COMM domain containing 6                                                           | COMMD6  | 695191    |
| COMM domain containing 8                                                           | COMMD8  | 704346    |
| Complement component 1, q subcomponent binding protein                             | C1QBP   | 711817    |
| Complement component 1, s subcomponent                                             | C1S     | 714589    |
| Complement component 5                                                             | C5      | 700467    |
| Complement component 7                                                             | C7      | 696926    |
| Complement factor properdin                                                        | CFP     | 707386    |
| Complexin 1                                                                        | CPLX1   | 703519    |
| Component of oligomeric golgi complex 1                                            | COG1    | 695754    |
| Component of oligomeric golgi complex 2                                            | COG2    | 714263    |
| Component of oligomeric golgi complex 4                                            | COG4    | 712103    |
| Conserved helix-loop-helix ubiquitous kinase                                       | CHUK    | 709511    |
| Coordinator of PRMT5, differentiation stimulator                                   | COPRS   | 713293    |
| COP9 signalosome subunit 2                                                         | COPS2   | 714814    |
| COP9 signalosome subunit 3                                                         | COPS3   | 698461    |
| COP9 signalosome subunit 4                                                         | COPS4   | 693435    |
| COP9 signalosome subunit 5                                                         | COPS5   | 704584    |
| COP9 signalosome subunit 6                                                         | COPS6   | 710667    |
| Copine I                                                                           | CPNE1   | 100329144 |
| Copine II                                                                          | CPNE2   | 703557    |
| Copine V                                                                           | CPNE5   | 719255    |
| Copine VIII                                                                        | CPNE8   | 696586    |
| Copper chaperone for superoxide dismutase                                          | CCS     | 721802    |
| Core 1 synthase, glycoprotein-N-acetylgalactosamine 3-beta-galactosyltransferase 1 | C1GALT1 | 696870    |
| Core-binding factor, beta subunit                                                  | CBFB    | 695767    |
| Core-binding factor, runt domain, alpha subunit 2; translocated to, 3              | CBFA2T3 | 698233    |
| Cornichon family AMPA receptor auxiliary protein 1                                 | CNIH1   | 695002    |
| Cornichon family AMPA receptor auxiliary protein 4                                 | CNIH4   | 701767    |
| Coronin, actin binding protein, 1B                                                 | CORO1B  | 721725    |
| Cortactin                                                                          | CTTN    | 708291    |
| Cortactin binding protein 2                                                        | CTTNBP2 | 705351    |
| Corticotropin releasing hormone binding protein                                    | CRHBP   | 707589    |
| Corticotropin releasing hormone receptor 1                                         | CRHR1   | 574095    |
| COX11 homolog, cytochrome c oxidase assembly protein                               | COX11   | 641445    |

|                                                                  |         |           |
|------------------------------------------------------------------|---------|-----------|
| COX20 Cox2 chaperone homolog                                     | COX20   | 704298    |
| Creatine kinase, brain                                           | CKB     | 711167    |
| CREB regulated transcription coactivator 2                       | CRTC2   | 715908    |
| Cryptochrome circadian clock 1                                   | CRY1    | 703752    |
| Crystallin beta A4                                               | CRYBA4  | 715477    |
| Crystallin gamma S                                               | CRYGS   | 699720    |
| Crystallin, gamma C                                              | CRYGC   | 709553    |
| CSE1 chromosome segregation 1-like (yeast)                       | CSE1L   | 704301    |
| C-src tyrosine kinase                                            | CSK     | 702868    |
| CTD phosphatase subunit 1                                        | CTDP1   | 698467    |
| CTD small phosphatase like 2                                     | CTDSPL2 | 711917    |
| C-terminal binding protein 1                                     | CTBP1   | 694507    |
| CTP synthase 1                                                   | CTPS1   | 695498    |
| CTP synthase 2                                                   | CTPS2   | 721014    |
| CTR9 homolog, Paf1/RNA polymerase II complex component           | CTR9    | 705748    |
| CTS telomere maintenance complex component 1                     | CTC1    | 717075    |
| C-type lectin domain family 1, member A                          | CLEC1A  | 717526    |
| C-type lectin domain family 9 member A                           | CLEC9A  | 717472    |
| CUE domain containing 2                                          | CUEDC2  | 713243    |
| CUGBP, Elav-like family member 1                                 | CELF1   | 713167    |
| CUGBP, Elav-like family member 3                                 | CELF3   | 716884    |
| Cullin 4A                                                        | CUL4A   | 714302    |
| Cullin 5                                                         | CUL5    | 707559    |
| Cullin 7                                                         | CUL7    | 699545    |
| Cutc copper transporter                                          | CUTC    | 709050    |
| CWC15 spliceosome-associated protein                             | CWC15   | 698332    |
| CWF19-like 2, cell cycle control (S. Pombe)                      | CWF19L2 | 706825    |
| C-x(9)-C motif containing 1                                      | CMC1    | 705147    |
| C-x(9)-C motif containing 4                                      | CMC4    | 100423504 |
| Cyclic nucleotide binding domain containing 2                    | CNBD2   | 703290    |
| Cyclin A2                                                        | CCNA2   | 707259    |
| Cyclin and CBS domain divalent metal cation transport mediator 2 | CNNM2   | 714238    |
| Cyclin B2                                                        | CCNB2   | 702184    |
| Cyclin D2                                                        | CCND2   | 710379    |
| Cyclin D3                                                        | CCND3   | 695215    |
| Cyclin D-type binding-protein 1                                  | CCNDBP1 | 709589    |
| Cyclin E1                                                        | CCNE1   | 700589    |
| Cyclin G1                                                        | CCNG1   | 697738    |
| Cyclin H                                                         | CCNH    | 694224    |
| Cyclin I                                                         | CCNI    | 677687    |
| Cyclin O                                                         | CCNO    | 706193    |
| Cyclin T2                                                        | CCNT2   | 708813    |
| Cyclin-dependent kinase 1                                        | CDK1    | 699269    |
| Cyclin-dependent kinase 12                                       | CDK12   | 696733    |
| Cyclin-dependent kinase 14                                       | CDK14   | 703442    |
| Cyclin-dependent kinase 17                                       | CDK17   | 717183    |

|                                                                   |         |           |
|-------------------------------------------------------------------|---------|-----------|
| Cyclin-dependent kinase 19                                        | CDK19   | 698292    |
| Cyclin-dependent kinase 2                                         | CDK2    | 711002    |
| Cyclin-dependent kinase 4                                         | CDK4    | 715650    |
| Cyclin-dependent kinase 9                                         | CDK9    | 699840    |
| Cyclin-dependent kinase inhibitor 1B (p27, Kip1)                  | CDKN1B  | 697188    |
| Cyclin-dependent kinase inhibitor 2C (p18, inhibits CDK4)         | CDKN2C  | 711877    |
| Cyclin-dependent kinase inhibitor 2D (p19, inhibits CDK4)         | CDKN2D  | 713172    |
| Cyclin-dependent kinase-like 2 (CDC2-related kinase)              | CDKL2   | 701467    |
| Cystatin C                                                        | CST3    | 574313    |
| Cysteine rich hydrophobic domain 1                                | CHIC1   | 701720    |
| Cysteine rich hydrophobic domain 2                                | CHIC2   | 697359    |
| Cysteine/histidine-rich 1                                         | CYHR1   | 702522    |
| Cysteine-rich transmembrane module containing 1                   | CYSTM1  | 697656    |
| Cysteine-serine-rich nuclear protein 1                            | CSRNP1  | 694328    |
| Cysteine-serine-rich nuclear protein 2                            | CSRNP2  | 694549    |
| CysteinyI-trna synthetase                                         | CARS    | 706502    |
| CysteinyI-trna synthetase 2, mitochondrial (putative)             | CARS2   | 694840    |
| Cystinosin, lysosomal cystine transporter                         | CTNS    | 706721    |
| Cytidine deaminase                                                | CDA     | 705913    |
| Cytidine monophosphate (UMP-CMP) kinase 1, cytosolic              | CMPK1   | 710196    |
| Cytidine monophosphate N-acetylneuraminic acid synthetase         | CMAS    | 706604    |
| Cytochrome b reductase 1                                          | CYBRD1  | 694818    |
| Cytochrome b-245 heavy chain                                      | CYBB    | 696542    |
| Cytochrome b5 reductase 1                                         | CYB5R1  | 704519    |
| Cytochrome c oxidase subunit 5A                                   | COX5A   | 692061    |
| Cytochrome c oxidase subunit 6C                                   | COX6C   | 100428416 |
| Cytochrome c oxidase subunit IV isoform 1                         | COX4I1  | 693811    |
| Cytochrome c oxidase subunit viib                                 | COX7B   | 706099    |
| Cytochrome c oxidase subunit viic                                 | COX7C   | 100429280 |
| Cytochrome c-1                                                    | CYC1    | 700518    |
| Cytochrome P450, family 2, subfamily C, polypeptide 75            | CYP2C75 | 678686    |
| Cytochrome P450, family 2, subfamily D, polypeptide 6             | CYP2D6  | 678691    |
| Cytochrome P450, family 21, subfamily A, polypeptide 2            | CYP21A2 | 717020    |
| Cytochrome P450, family 3, subfamily A, polypeptide 5             | CYP3A5  | 678692    |
| Cytochrome P450, family 4, subfamily F, polypeptide 8             | CYP4F8  | 718335    |
| Cytochrome P450c17                                                | CYP17A1 | 678693    |
| Cytokine inducible SH2-containing protein                         | CISH    | 701456    |
| Cytoplasmic FMR1 interacting protein 2                            | CYFIP2  | 714984    |
| Cytoplasmic linker associated protein 2                           | CLASP2  | 706519    |
| Cytoplasmic polyadenylation element binding protein 2             | CPEB2   | 722844    |
| Cytoskeleton associated protein 2 like                            | CKAP2L  | 704381    |
| Cytoskeleton associated protein 5                                 | CKAP5   | 714095    |
| Cytosolic thiouridylase subunit 1                                 | CTU1    | 719536    |
| Dab, mitogen-responsive phosphoprotein, homolog 2<br>(Drosophila) | DAB2    | 694349    |
| Dachshund family transcription factor 1                           | DACH1   | 693532    |
| Dachsous cadherin-related 1                                       | DCHS1   | 711938    |
| DALR anticodon binding domain containing 3                        | DALRD3  | 708403    |

|                                                              |         |           |
|--------------------------------------------------------------|---------|-----------|
| Damage-specific DNA binding protein 2                        | DDB2    | 713813    |
| DAZ associated protein 1                                     | DAZAP1  | 707132    |
| DCN1, defective in cullin neddylation 1, domain containing 1 | DCUN1D1 | 708357    |
| DCN1, defective in cullin neddylation 1, domain containing 4 | DCUN1D4 | 702908    |
| DCN1, defective in cullin neddylation 1, domain containing 5 | DCUN1D5 | 704099    |
| DDB1 and CUL4 associated factor 11                           | DCAF11  | 714867    |
| DDB1 and CUL4 associated factor 4                            | DCAF4   | 695337    |
| DDB1 and CUL4 associated factor 5                            | DCAF5   | 714522    |
| DDB1 and CUL4 associated factor 6                            | DCAF6   | 698686    |
| D-dopachrome tautomerase                                     | DDT     | 699933    |
| DDRKG domain containing 1                                    | DDRKG1  | 717226    |
| DEAD (Asp-Glu-Ala-Asp) box helicase 1                        | DDX1    | 698327    |
| DEAD (Asp-Glu-Ala-Asp) box helicase 3, Y-linked              | DDX3Y   | 100270696 |
| DEAD (Asp-Glu-Ala-Asp) box helicase 5                        | DDX5    | 677694    |
| DEAD (Asp-Glu-Ala-Asp) box helicase 56                       | DDX56   | 698980    |
| DEAD (Asp-Glu-Ala-Asp) box polypeptide 27                    | DDX27   | 703852    |
| DEAD (Asp-Glu-Ala-Asp) box polypeptide 39A                   | DDX39A  | 718822    |
| DEAD (Asp-Glu-Ala-Asp) box polypeptide 41                    | DDX41   | 700742    |
| DEAD (Asp-Glu-Ala-Asp) box polypeptide 47                    | DDX47   | 697304    |
| DEAD (Asp-Glu-Ala-Asp) box polypeptide 54                    | DDX54   | 712763    |
| DEAD (Asp-Glu-Ala-Asp) box polypeptide 60                    | DDX60   | 693567    |
| DEAD/H (Asp-Glu-Ala-Asp/His) box helicase 11                 | DDX11   | 717040    |
| DEAD/H (Asp-Glu-Ala-Asp/His) box polypeptide 26B             | DDX26B  | 709688    |
| Deafness, autosomal dominant 5                               | DFNA5   | 703441    |
| Deafness, autosomal recessive 31                             | DFNB31  | 708051    |
| DEAH (Asp-Glu-Ala-Asp/His) box polypeptide 57                | DHX57   | 713523    |
| DEAH (Asp-Glu-Ala-His) box helicase 15                       | DHX15   | 715852    |
| DEAH (Asp-Glu-Ala-His) box helicase 30                       | DHX30   | 711178    |
| DEAH (Asp-Glu-Ala-His) box helicase 9                        | DHX9    | 715453    |
| DEAH (Asp-Glu-Ala-His) box polypeptide 29                    | DHX29   | 706306    |
| DEAH (Asp-Glu-Ala-His) box polypeptide 38                    | DHX38   | 709173    |
| DEAQ box RNA-dependent ATPase 1                              | DQX1    | 709749    |
| Death associated protein 3                                   | DAP3    | 719314    |
| Death effector domain containing                             | DEDD    | 719875    |
| Death inducer-obliterator 1                                  | DIDO1   | 698313    |
| Death-associated protein                                     | DAP     | 697362    |
| Debranching RNA lariats 1                                    | DBR1    | 716467    |
| Decapping exoribonuclease                                    | DXO     | 716027    |
| Decapping mrna 1A                                            | DCP1A   | 694198    |
| Decapping mrna 1B                                            | DCP1B   | 708089    |
| Decorin                                                      | DCN     | 709933    |
| Dedicator of cytokinesis 5                                   | DOCK5   | 711359    |
| Defender against cell death 1                                | DAD1    | 711840    |
| Defensin beta 118                                            | DEFB118 | 641438    |
| Defensin, alpha 4, corticostatin                             | DEFA4   | 574311    |
| Dehydrodolichyl diphosphate synthase subunit                 | DHDDS   | 714635    |
| Dehydrogenase/reductase (SDR family) member 1                | DHRS1   | 715933    |
| Dehydrogenase/reductase (SDR family) member 11               | DHRS11  | 713823    |



|                                                               |         |           |
|---------------------------------------------------------------|---------|-----------|
| Dehydrogenase/reductase (SDR family) member 3                 | DHRS3   | 715548    |
| Dehydrogenase/reductase (SDR family) member 7                 | DHRS7   | 702872    |
| Dehydrogenase/reductase (SDR family) member 9                 | DHRS9   | 705554    |
| Deiodinase, iodothyronine, type II                            | DIO2    | 707484    |
| DEK proto-oncogene                                            | DEK     | 712460    |
| Deleted in lung and esophageal cancer 1                       | DLEC1   | 697163    |
| Deleted in primary ciliary dyskinesia homolog (mouse)         | DPCD    | 712082    |
| Delta(4)-desaturase, sphingolipid 1                           | DEGS1   | 702128    |
| Delta(4)-desaturase, sphingolipid 2                           | DEGS2   | 717222    |
| Delta-like 1 homolog (Drosophila)                             | DLK1    | 707595    |
| Delta-like 2 homolog (Drosophila)                             | DLK2    | 700106    |
| Deltex 3, E3 ubiquitin ligase                                 | DTX3    | 715175    |
| DENN/MADD domain containing 4A                                | DENND4A | 709675    |
| DENN/MADD domain containing 5A                                | DENND5A | 707945    |
| DENN/MADD domain containing 6A                                | DENND6A | 707616    |
| Denticleless E3 ubiquitin protein ligase homolog (Drosophila) | DTL     | 711236    |
| Deoxyguanosine kinase                                         | DGUOK   | 707554    |
| Deoxyhypusine synthase                                        | DHPS    | 716213    |
| Deoxythymidylate kinase                                       | DTYMK   | 701781    |
| DEP domain containing 1B                                      | DEPDC1B | 709670    |
| Dephospho-coa kinase domain containing                        | DCAKD   | 715841    |
| Derlin 1                                                      | DERL1   | 703803    |
| Derlin 2                                                      | DERL2   | 712051    |
| Dermatan sulfate epimerase                                    | DSE     | 716054    |
| Dermatopontin                                                 | DPT     | 700181    |
| Desmoplakin                                                   | DSP     | 694860    |
| Desumoylating isopeptidase 2                                  | DESI2   | 713515    |
| Developmentally regulated GTP binding protein 1               | DRG1    | 716791    |
| Dexi homolog (mouse)                                          | DEXI    | 100430904 |
| Diacylglycerol kinase, beta 90kda                             | DGKB    | 715254    |
| Diaphanous related formin 2                                   | DIAPH2  | 699140    |
| Dicer 1, ribonuclease type III                                | DICER1  | 702516    |
| Dickkopf WNT signaling pathway inhibitor 1                    | DKK1    | 702997    |
| Dickkopf WNT signaling pathway inhibitor 2                    | DKK2    | 694869    |
| Digeorge syndrome critical region gene 6                      | DGCR6   | 693512    |
| Dihydrolipoamide S-acetyltransferase                          | DLAT    | 710930    |
| Dihydropyrimidinase like 3                                    | DPYSL3  | 708425    |
| Dihydropyrimidine dehydrogenase                               | DPYD    | 715672    |
| Dihydrouridine synthase 1-like                                | DUS1L   | 715662    |
| Dihydrouridine synthase 3-like                                | DUS3L   | 719524    |
| Dimethylarginine dimethylaminohydrolase 1                     | DDAH1   | 711395    |
| Dimethylglycine dehydrogenase                                 | DMGDH   | 709237    |
| Dipeptidase 2                                                 | DPEP2   | 701570    |
| Dipeptidyl-peptidase 3                                        | DPP3    | 721809    |
| Dipeptidyl-peptidase 8                                        | DPP8    | 709428    |
| Diphosphoinositol pentakisphosphate kinase 2                  | PPIP5K2 | 703458    |
| Diphthamine biosynthesis 6                                    | DPH6    | 701401    |
| DIS3 like exosome 3'-5' exoribonuclease                       | DIS3L   | 710238    |

|                                                                                |         |        |
|--------------------------------------------------------------------------------|---------|--------|
| Discoidin domain receptor tyrosine kinase 1                                    | DDR1    | 714233 |
| Discoidin domain receptor tyrosine kinase 2                                    | DDR2    | 720124 |
| Discs, large homolog 1 (Drosophila)                                            | DLG1    | 709572 |
| Discs, large homolog 4 (Drosophila)                                            | DLG4    | 714273 |
| Discs, large homolog 5 (Drosophila)                                            | DLG5    | 703123 |
| Dishevelled segment polarity protein 1                                         | DVL1    | 705864 |
| Dishevelled segment polarity protein 2                                         | DVL2    | 714381 |
| Dishevelled-binding antagonist of beta-catenin 1                               | DACT1   | 701218 |
| Dispatched homolog 1 (Drosophila)                                              | DISP1   | 703960 |
| Distal-less homeobox 5                                                         | DLX5    | 697853 |
| Dmx-like 1                                                                     | DMXL1   | 698117 |
| DNA (cytosine-5-)-methyltransferase 1                                          | DNMT1   | 574321 |
| DNA cross-link repair 1B                                                       | DCLRE1B | 707742 |
| DNA methyltransferase 1 associated protein 1                                   | DMAPI   | 702919 |
| Dnaj heat shock protein family (Hsp40) member A1                               | DNAJA1  | 703765 |
| Dnaj heat shock protein family (Hsp40) member A4                               | DNAJA4  | 709872 |
| Dnaj heat shock protein family (Hsp40) member B1                               | DNAJB1  | 718890 |
| Dnaj heat shock protein family (Hsp40) member B4                               | DNAJB4  | 707206 |
| Dnaj heat shock protein family (Hsp40) member B9                               | DNAJB9  | 701094 |
| Dnaj heat shock protein family (Hsp40) member C1                               | DNAJC1  | 704151 |
| Dnaj heat shock protein family (Hsp40) member C12                              | DNAJC12 | 695795 |
| Dnaj heat shock protein family (Hsp40) member C19                              | DNAJC19 | 710082 |
| Dnaj heat shock protein family (Hsp40) member C27                              | DNAJC27 | 694037 |
| Dnaj heat shock protein family (Hsp40) member C3                               | DNAJC3  | 695757 |
| Dnaj heat shock protein family (Hsp40) member C5 beta                          | DNAJC5B | 702408 |
| Dnaj heat shock protein family (Hsp40) member C6                               | DNAJC6  | 698682 |
| Dnaj heat shock protein family (Hsp40) member C8                               | DNAJC8  | 720231 |
| Dnaj heat shock protein family (Hsp40) member C9                               | DNAJC9  | 707599 |
| Docking protein 5                                                              | DOK5    | 698689 |
| Dolichyl-phosphate mannosyltransferase polypeptide 2,<br>regulatory<br>subunit | DPM2    | 698709 |
| Double C2-like domains, alpha                                                  | DOC2A   | 707895 |
| Double zinc ribbon and ankyrin repeat domains 1                                | DZANK1  | 700143 |
| DR1-associated protein 1 (negative cofactor 2 alpha)                           | DRAP1   | 715271 |
| Drebrin 1                                                                      | DBN1    | 700375 |
| Drosha, ribonuclease type III                                                  | DROSHA  | 692081 |
| DTW domain containing 1                                                        | DTWD1   | 715084 |
| D-tyrosyl-trna deacylase 1                                                     | DTD1    | 700895 |
| Dual serine/threonine and tyrosine protein kinase                              | DSTYK   | 664732 |
| Dual specificity phosphatase 1                                                 | DUSP1   | 702981 |
| Dual specificity phosphatase 10                                                | DUSP10  | 705056 |
| Dual specificity phosphatase 11                                                | DUSP11  | 707123 |
| Dual specificity phosphatase 12                                                | DUSP12  | 720034 |
| Dual specificity phosphatase 14                                                | DUSP14  | 714383 |
| Dual specificity phosphatase 23                                                | DUSP23  | 719474 |
| Dual specificity phosphatase 26 (putative)                                     | DUSP26  | 697134 |
| Dual specificity phosphatase 6                                                 | DUSP6   | 708907 |

|                                                                   |         |        |
|-------------------------------------------------------------------|---------|--------|
| Dual specificity tyrosine-(Y)-phosphorylation regulated kinase 1B | DYRK1B  | 698848 |
| Dual specificity tyrosine-(Y)-phosphorylation regulated kinase 2  | DYRK2   | 717941 |
| Dual specificity tyrosine-(Y)-phosphorylation regulated kinase 3  | DYRK3   | 695163 |
| Dynactin subunit 1                                                | DCTN1   | 708290 |
| Dynactin subunit 2                                                | DCTN2   | 714948 |
| Dynactin subunit 6                                                | DCTN6   | 694273 |
| Dynamamin 1-like                                                  | DNM1L   | 695388 |
| Dynamamin 2                                                       | DNM2    | 713558 |
| Dynein regulatory complex subunit 3                               | DRC3    | 699590 |
| Dynein, axonemal, assembly factor 2                               | DNAAF2  | 719026 |
| Dynein, axonemal, heavy chain 7                                   | DNAH7   | 695393 |
| Dynein, axonemal, intermediate chain 1                            | DNAI1   | 701307 |
| Dynein, cytoplasmic 1, intermediate chain 2                       | DYNC1I2 | 695696 |
| Dynein, light chain, LC8-type 1                                   | DYNLL1  | 702360 |
| Dynein, light chain, roadblock-type 2                             | DYNLRB2 | 713503 |
| E1A binding protein p300                                          | EP300   | 706258 |
| E2F transcription factor 1                                        | E2F1    | 714126 |
| E2F transcription factor 2                                        | E2F2    | 710200 |
| E2F transcription factor 3                                        | E2F3    | 713904 |
| E2F transcription factor 4, p107/p130-binding                     | E2F4    | 696864 |
| E2F transcription factor 5, p130-binding                          | E2F5    | 703352 |
| E2F transcription factor 7                                        | E2F7    | 694423 |
| E2F-associated phosphoprotein                                     | EAPP    | 714727 |
| E74-like factor 1 (ets domain transcription factor)               | ELF1    | 697952 |
| E74-like factor 2 (ets domain transcription factor)               | ELF2    | 696760 |
| E74-like factor 5 (ets domain transcription factor)               | ELF5    | 717377 |
| Ecdysoneless homolog (Drosophila)                                 | ECD     | 707699 |
| ECSIT signalling integrator                                       | ECSIT   | 714805 |
| Ectodermal-neural cortex 1 (with BTB domain)                      | ENC1    | 704577 |
| Ectodysplasin A receptor                                          | EDAR    | 695059 |
| Ecto-NOX disulfide-thiol exchanger 1                              | ENOX1   | 700475 |
| Ecto-NOX disulfide-thiol exchanger 2                              | ENOX2   | 703816 |
| Ectonucleoside triphosphate diphosphohydrolase 5                  | ENTPD5  | 698503 |
| Ectonucleotide pyrophosphatase/phosphodiesterase 2                | ENPP2   | 705287 |
| Ectonucleotide pyrophosphatase/phosphodiesterase 4 (putative)     | ENPP4   | 703680 |
| Ectonucleotide pyrophosphatase/phosphodiesterase 6                | ENPP6   | 693950 |
| EF-hand calcium binding domain 12                                 | EFCAB12 | 703176 |
| EF-hand calcium binding domain 6                                  | EFCAB6  | 712043 |
| EF-hand calcium binding domain 7                                  | EFCAB7  | 696830 |
| EF-hand domain (C-terminal) containing 1                          | EFHC1   | 708517 |
| EF-hand domain family member D1                                   | EFHD1   | 717627 |
| EF-hand domain family member D2                                   | EFHD2   | 694155 |
| EGF-like, fibronectin type III and laminin G domains              | EGFLAM  | 693314 |
| EGF-like-domain, multiple 6                                       | EGFL6   | 711280 |

|                                                                   |         |        |
|-------------------------------------------------------------------|---------|--------|
| EGF-like-domain, multiple 7                                       | EGFL7   | 709840 |
| EGF-like-domain, multiple 8                                       | EGFL8   | 717145 |
| Egl-9 family hypoxia-inducible factor 1                           | EGLN1   | 713410 |
| Egl-9 family hypoxia-inducible factor 2                           | EGLN2   | 703083 |
| EH domain binding protein 1                                       | EHBP1   | 693902 |
| Elastin microfibril interfacer 1                                  | EMILIN1 | 698204 |
| Electron-transferring-flavoprotein dehydrogenase                  | ETFDH   | 701207 |
| ELL associated factor 2                                           | EAF2    | 714223 |
| ELMO/CED-12 domain containing 2                                   | ELMOD2  | 698742 |
| Elongation factor RNA polymerase II-like 3                        | ELL3    | 711271 |
| Elongation factor Tu GTP binding domain containing 2              | EFTUD2  | 715512 |
| ELOVL fatty acid elongase 1                                       | ELOVL1  | 700557 |
| ELOVL fatty acid elongase 2                                       | ELOVL2  | 703030 |
| ELOVL fatty acid elongase 4                                       | ELOVL4  | 692070 |
| ELOVL fatty acid elongase 6                                       | ELOVL6  | 698870 |
| Embryonal Fyn-associated substrate                                | EFS     | 713838 |
| Embryonic ectoderm development                                    | EED     | 703866 |
| Emopamil binding protein (sterol isomerase)                       | EBP     | 714315 |
| Empty spiracles homeobox 1                                        | EMX1    | 705441 |
| Endogenous Bornavirus-like nucleoprotein 2                        | EBLN2   | 693420 |
| Endonuclease domain containing 1                                  | ENDOD1  | 699210 |
| Endonuclease G                                                    | ENDOG   | 717171 |
| Endonuclease, poly(U) specific                                    | ENDOU   | 703854 |
| Endonuclease/exonuclease/phosphatase family domain containing 1   | EEPD1   | 706642 |
| Endoplasmic reticulum aminopeptidase 2                            | ERAP2   | 700118 |
| Endoplasmic reticulum lectin 1                                    | ERLEC1  | 716460 |
| Endoplasmic reticulum protein 27                                  | ERP27   | 700186 |
| Endothelin 3                                                      | EDN3    | 693385 |
| Energy homeostasis associated                                     | ENHO    | 701072 |
| Engulfment and cell motility 1                                    | ELMO1   | 705818 |
| Engulfment and cell motility 2                                    | ELMO2   | 707316 |
| Enhancer of polycomb homolog 2 (Drosophila)                       | EPC2    | 721916 |
| Enhancer of rudimentary homolog (Drosophila)                      | ERH     | 712507 |
| Enhancer of yellow 2 homolog (Drosophila)                         | ENY2    | 699048 |
| Enhancer of zeste 1 polycomb repressive complex 2 subunit         | EZH1    | 711173 |
| Enhancer of zeste 2 polycomb repressive complex 2 subunit         | EZH2    | 709075 |
| Enkurin domain containing 1                                       | ENKD1   | 699487 |
| Enolase 1, (alpha)                                                | ENO1    | 709378 |
| Enolase superfamily member 1                                      | ENOSF1  | 697333 |
| Enoyl-coa delta isomerase 2                                       | ECI2    | 709579 |
| EPH receptor B6                                                   | EPHB6   | 704886 |
| Ephrin-B1                                                         | EFNB1   | 694149 |
| Epidermal growth factor receptor pathway substrate 15-like 1      | EPS15L1 | 719502 |
| Epidermal growth factor receptor pathway substrate 8              | EPS8    | 702777 |
| Epididymal protein 3A                                             | EDDM3A  | 704355 |
| Epilepsy, progressive myoclonus type 2A, Lafora disease (laforin) | EPM2A   | 699361 |

|                                                               |          |           |
|---------------------------------------------------------------|----------|-----------|
| Epithelial cell transforming 2                                | ECT2     | 694056    |
| Epithelial membrane protein 3                                 | EMP3     | 717867    |
| EPS8 like 1                                                   | EPS8L1   | 698281    |
| EPS8-like 3                                                   | EPS8L3   | 700441    |
| Epsin 1                                                       | EPN1     | 702956    |
| ER degradation enhancer, mannosidase alpha-like 3             | EDEM3    | 714475    |
| ER membrane protein complex subunit 4                         | EMC4     | 695907    |
| ER membrane protein complex subunit 6                         | EMC6     | 707030    |
| ER membrane protein complex subunit 8                         | EMC8     | 693674    |
| ER membrane protein complex subunit 9                         | EMC9     | 715192    |
| ERBB receptor feedback inhibitor 1                            | ERRFI1   | 722072    |
| ERGIC and golgi 3                                             | ERGIC3   | 704736    |
| Erythrocyte membrane protein band 4.1-like 1                  | EPB41L1  | 710697    |
| ES cell expressed Ras                                         | ERAS     | 711442    |
| ESF1 nucleolar pre-rRNA processing protein homolog            | ESF1     | 694159    |
| Esterase D                                                    | ESD      | 708871    |
| Ethanolamine kinase 2                                         | ETNK2    | 700683    |
| Ethanolamine-phosphate phospho-lyase                          | ETNPPL   | 696880    |
| Ethanolaminephosphotransferase 1                              | EPT1     | 698276    |
| Eukaryotic elongation factor, selenocysteine-trna-specific    | EEFSEC   | 705784    |
| Eukaryotic translation elongation factor 1 beta 2             | EEF1B2   | 707019    |
| Eukaryotic translation elongation factor 1 epsilon 1          | EEF1E1   | 695426    |
| Eukaryotic translation elongation factor 1 gamma              | EEF1G    | 722274    |
| Eukaryotic translation initiation factor 2 subunit alpha      | EIF2S1   | 710150    |
| Eukaryotic translation initiation factor 2 subunit beta       | EIF2S2   | 708593    |
| Eukaryotic translation initiation factor 2A, 65kda            | EIF2A    | 710497    |
| Eukaryotic translation initiation factor 2-alpha kinase 3     | EIF2AK3  | 699575    |
| Eukaryotic translation initiation factor 2D                   | EIF2D    | 695274    |
| Eukaryotic translation initiation factor 3 subunit D          | EIF3D    | 695051    |
| Eukaryotic translation initiation factor 3 subunit E          | EIF3E    | 697622    |
| Eukaryotic translation initiation factor 3 subunit F          | EIF3F    | 706269    |
| Eukaryotic translation initiation factor 3 subunit G          | EIF3G    | 714726    |
| Eukaryotic translation initiation factor 3 subunit H          | EIF3H    | 700517    |
| Eukaryotic translation initiation factor 3 subunit K          | EIF3K    | 693536    |
| Eukaryotic translation initiation factor 3 subunit L          | EIF3L    | 699189    |
| Eukaryotic translation initiation factor 3 subunit M          | EIF3M    | 695698    |
| Eukaryotic translation initiation factor 4A2                  | EIF4A2   | 707775    |
| Eukaryotic translation initiation factor 4A3                  | EIF4A3   | 712141    |
| Eukaryotic translation initiation factor 4E binding protein 1 | EIF4EBP1 | 703628    |
| Eukaryotic translation initiation factor 4E binding protein 2 | EIF4EBP2 | 100424760 |
| Eukaryotic translation initiation factor 4E binding protein 3 | EIF4EBP3 | 100532736 |
| Eukaryotic translation initiation factor 4E family member 2   | EIF4E2   | 713487    |
| Eukaryotic translation initiation factor 4H                   | EIF4H    | 693429    |
| Eukaryotic translation termination factor 1                   | ETF1     | 714449    |
| Eva-1 homolog B (C. Elegans)                                  | EVA1B    | 713159    |
| EWS RNA binding protein 1                                     | EWSR1    | 714432    |
| Excision repair cross-complementation group 2                 | ERCC2    | 715485    |
| Excision repair cross-complementation group 3                 | ERCC3    | 698829    |

|                                               |          |        |
|-----------------------------------------------|----------|--------|
| Excision repair cross-complementation group 6 | ERCC6    | 710153 |
| Exocyst complex component 1                   | EXOC1    | 695664 |
| Exocyst complex component 2                   | EXOC2    | 706296 |
| Exocyst complex component 4                   | EXOC4    | 712458 |
| Exosome component 10                          | EXOSC10  | 714153 |
| Exosome component 3                           | EXOSC3   | 716347 |
| Exostosin glycosyltransferase 1               | EXT1     | 701488 |
| Exostosin glycosyltransferase 2               | EXT2     | 715975 |
| Exportin 1                                    | XPO1     | 718063 |
| Exportin 4                                    | XPO4     | 703548 |
| Exportin 5                                    | XPO5     | 700664 |
| Exportin 6                                    | XPO6     | 704332 |
| Exportin, trna                                | XPOT     | 717375 |
| Extended synaptotagmin-like protein 1         | ESYT1    | 711720 |
| Extra spindle pole bodies like 1, separase    | ESPL1    | 702136 |
| Extracellular matrix protein 1                | ECM1     | 707209 |
| F11 receptor                                  | F11R     | 719824 |
| Factor interacting with PAPOLA and CPSF1      | FIP1L1   | 697725 |
| Failed axon connections homolog               | FAXC     | 693945 |
| Family with sequence similarity 102 member A  | FAM102A  | 698590 |
| Family with sequence similarity 104 member A  | FAM104A  | 695865 |
| Family with sequence similarity 110 member A  | FAM110A  | 717055 |
| Family with sequence similarity 110 member B  | FAM110B  | 703840 |
| Family with sequence similarity 117 member A  | FAM117A  | 700079 |
| Family with sequence similarity 122A          | FAM122A  | 698955 |
| Family with sequence similarity 122C          | FAM122C  | 709915 |
| Family with sequence similarity 124 member B  | FAM124B  | 707444 |
| Family with sequence similarity 127, member A | FAM127A  | 708766 |
| Family with sequence similarity 129 member B  | FAM129B  | 707403 |
| Family with sequence similarity 134 member A  | FAM134A  | 704378 |
| Family with sequence similarity 134 member B  | FAM134B  | 717983 |
| Family with sequence similarity 151 member B  | FAM151B  | 715256 |
| Family with sequence similarity 156 member B  | FAM156B  | 698392 |
| Family with sequence similarity 160 member A2 | FAM160A2 | 711641 |
| Family with sequence similarity 162 member A  | FAM162A  | 714652 |
| Family with sequence similarity 170 member A  | FAM170A  | 701046 |
| Family with sequence similarity 171 member B  | FAM171B  | 712442 |
| Family with sequence similarity 174 member A  | FAM174A  | 702300 |
| Family with sequence similarity 175 member B  | FAM175B  | 694886 |
| Family with sequence similarity 178 member B  | FAM178B  | 710890 |
| Family with sequence similarity 179 member B  | FAM179B  | 702188 |
| Family with sequence similarity 181 member B  | FAM181B  | 701184 |
| Family with sequence similarity 185 member A  | FAM185A  | 694971 |
| Family with sequence similarity 188 member A  | FAM188A  | 699009 |
| Family with sequence similarity 199, X-linked | FAM199X  | 699523 |
| Family with sequence similarity 20 member C   | FAM20C   | 695088 |
| Family with sequence similarity 212 member A  | FAM212A  | 704983 |
| Family with sequence similarity 219 member A  | FAM219A  | 700651 |

|                                                        |         |        |
|--------------------------------------------------------|---------|--------|
| Family with sequence similarity 220 member A           | FAM220A | 703785 |
| Family with sequence similarity 222 member B           | FAM222B | 710302 |
| Family with sequence similarity 26 member F            | FAM26F  | 715967 |
| Family with sequence similarity 3 member A             | FAM3A   | 701159 |
| Family with sequence similarity 35 member A            | FAM35A  | 694102 |
| Family with sequence similarity 49 member A            | FAM49A  | 698947 |
| Family with sequence similarity 58 member A            | FAM58A  | 695925 |
| Family with sequence similarity 63 member B            | FAM63B  | 703159 |
| Family with sequence similarity 64 member A            | FAM64A  | 712701 |
| Family with sequence similarity 76 member A            | FAM76A  | 716420 |
| Family with sequence similarity 76 member B            | FAM76B  | 699581 |
| Family with sequence similarity 8 member A1            | FAM8A1  | 703789 |
| Family with sequence similarity 81 member A            | FAM81A  | 702510 |
| Family with sequence similarity 89 member B            | FAM89B  | 721925 |
| Family with sequence similarity 91 member A1           | FAM91A1 | 705119 |
| Family with sequence similarity 92 member A1           | FAM92A1 | 698794 |
| FANCD2/FANCI-associated nuclease 1                     | FAN1    | 713125 |
| Fanconi anemia complementation group E                 | FANCE   | 718889 |
| Fanconi anemia complementation group G                 | FANCG   | 698837 |
| Far upstream element (FUSE) binding protein 1          | FUBP1   | 707102 |
| Farnesyl-diphosphate farnesyltransferase 1             | FDFT1   | 696396 |
| Farnesyltransferase, CAAX box, beta                    | FNTB    | 708129 |
| Fas (TNFRSF6) associated factor 1                      | FAF1    | 714405 |
| Fas apoptotic inhibitory molecule                      | FAIM    | 716216 |
| Fasciculation and elongation protein zeta 1            | FEZ1    | 713106 |
| Fasciculation and elongation protein zeta 2 (zygin II) | FEZ2    | 708288 |
| FAST kinase domains 1                                  | FASTKD1 | 706154 |
| Fat storage-inducing transmembrane protein 1           | FITM1   | 715085 |
| Fatty acid 2-hydroxylase                               | FA2H    | 710403 |
| Fatty acid binding protein 7, brain                    | FABP7   | 713762 |
| Fatty acid desaturase 2                                | FADS2   | 719037 |
| Fatty acid desaturase 3                                | FADS3   | 722337 |
| Fatty acyl coa reductase 1                             | FAR1    | 699947 |
| F-box and WD repeat domain containing 11               | FBXW11  | 708990 |
| F-box and WD repeat domain containing 4                | FBXW4   | 711996 |
| F-box and WD repeat domain containing 7                | FBXW7   | 695101 |
| F-box and WD repeat domain containing 9                | FBXW9   | 716383 |
| F-box protein 11                                       | FBXO11  | 715651 |
| F-box protein 25                                       | FBXO25  | 716139 |
| F-box protein 30                                       | FBXO30  | 699241 |
| F-box protein 32                                       | FBXO32  | 704804 |
| F-box protein 4                                        | FBXO4   | 697007 |
| Fc fragment of igg, receptor, transporter, alpha       | FCGRT   | 718859 |
| Fc receptor-like B                                     | FCRLB   | 720028 |
| FCH and double SH3 domains 2                           | FCHSD2  | 717996 |
| Feline leukemia virus subgroup C cellular receptor 1   | FLVCR1  | 710008 |
| Fem-1 homolog b (C. Elegans)                           | FEM1B   | 693955 |
| Fer (fps/fes related) tyrosine kinase                  | FER     | 711220 |

|                                                                                       |          |        |
|---------------------------------------------------------------------------------------|----------|--------|
| FERM domain containing 3                                                              | FRMD3    | 713394 |
| FERM domain containing 6                                                              | FRMD6    | 707266 |
| Fermitin family member 2                                                              | FERMT2   | 693958 |
| Fetal and adult testis expressed 1                                                    | FATE1    | 704368 |
| FGFR1 oncogene partner                                                                | FGFR1OP  | 706749 |
| Fibrillarlin                                                                          | FBL      | 700286 |
| Fibroblast activation protein alpha                                                   | FAP      | 701541 |
| Fibroblast growth factor 10                                                           | FGF10    | 701584 |
| Fibroblast growth factor 13                                                           | FGF13    | 695460 |
| Fibroblast growth factor 16                                                           | FGF16    | 705612 |
| Fibroblast growth factor 7                                                            | FGF7     | 574345 |
| Fibroblast growth factor receptor substrate 3                                         | FRS3     | 694462 |
| Fibronectin 1                                                                         | FN1      | 613269 |
| Fibronectin type III and ankyrin repeat domains 1                                     | FANK1    | 696281 |
| Fibronectin type III domain containing 4                                              | FNDC4    | 702098 |
| FIC domain containing                                                                 | FICD     | 706780 |
| FIG4 phosphoinositide 5-phosphatase                                                   | FIG4     | 699914 |
| Filamin A interacting protein 1                                                       | FILIP1   | 716439 |
| Filamin B, beta                                                                       | FLNB     | 702732 |
| Filamin binding LIM protein 1                                                         | FBLIM1   | 695727 |
| Finkel-Biskis-Reilly murine sarcoma virus (FBR-musv)<br>ubiquitously<br>expressed     | FAU      | 716761 |
| FK506 binding protein 11                                                              | FKBP11   | 708598 |
| FK506 binding protein 1B                                                              | FKBP1B   | 703973 |
| FK506 binding protein 6                                                               | FKBP6    | 716306 |
| FK506 binding protein 7                                                               | FKBP7    | 703299 |
| FK506 binding protein 9                                                               | FKBP9    | 708827 |
| Flavin adenine dinucleotide synthetase 1                                              | FLAD1    | 717133 |
| Flavin containing monooxygenase 5                                                     | FMO5     | 709691 |
| Flightless I actin binding protein                                                    | FLII     | 700471 |
| FLYWCH-type zinc finger 1                                                             | FLYWCH1  | 700909 |
| Fms-related tyrosine kinase 3 ligand                                                  | FLT3LG   | 719239 |
| Folate receptor 1 (adult)                                                             | FOLR1    | 718388 |
| Follistatin like 1                                                                    | FSTL1    | 713367 |
| Forkhead box A3                                                                       | FOXA3    | 715663 |
| Forkhead box O3                                                                       | FOXO3    | 700731 |
| Forkhead box P2                                                                       | FOXP2    | 613237 |
| Forkhead box P4                                                                       | FOXP4    | 693943 |
| Formin homology 2 domain containing 1                                                 | FHOD1    | 697346 |
| Four and a half LIM domains 2                                                         | FHL2     | 713222 |
| Fragile site, folic acid type, rare, fra(10)(q23.3) or fra<br>(10)(q24.2) candidate 1 | FRA10AC1 | 700389 |
| Fragile X mental retardation, autosomal homolog 1                                     | FXR1     | 710170 |
| FRAS1 related extracellular matrix 1                                                  | FREM1    | 713874 |
| Frataxin                                                                              | FXN      | 699469 |
| Free fatty acid receptor 2                                                            | FFAR2    | 709026 |
| Frizzled class receptor 5                                                             | FZD5     | 710796 |



|                                                                         |           |           |
|-------------------------------------------------------------------------|-----------|-----------|
| Frizzled class receptor 6                                               | FZD6      | 694625    |
| Ftsj RNA methyltransferase homolog 1 (E. Coli)                          | FTSJ1     | 710243    |
| Fucokinase                                                              | FUK       | 709226    |
| Fucosidase, alpha-L- 2, plasma                                          | FUCA2     | 700611    |
| Fukutin related protein                                                 | FKRP      | 716804    |
| Fumarylacetoacetate hydrolase (fumarylacetoacetase)                     | FAH       | 712716    |
| FUN14 domain containing 1                                               | FUNDC1    | 709370    |
| Fuzzy planar cell polarity protein                                      | FUZ       | 719442    |
| FXYP domain containing ion transport regulator 6                        | FXYP6     | 698456    |
| FXYP domain containing ion transport regulator 7                        | FXYP7     | 718457    |
| FYN proto-oncogene, Src family tyrosine kinase                          | FYN       | 574214    |
| FYVE, rhogef and PH domain containing 2                                 | FGD2      | 719329    |
| FYVE, rhogef and PH domain containing 4                                 | FGD4      | 695281    |
| G elongation factor, mitochondrial 1                                    | GFM1      | 706456    |
| G elongation factor, mitochondrial 2                                    | GFM2      | 704247    |
| G kinase anchoring protein 1                                            | GKAP1     | 708816    |
| G protein pathway suppressor 1                                          | GPS1      | 719343    |
| G protein regulated inducer of neurite outgrowth 2                      | GPRIN2    | 694369    |
| G protein-coupled bile acid receptor 1                                  | GPBAR1    | 697937    |
| G protein-coupled receptor 135                                          | GPR135    | 701843    |
| G protein-coupled receptor 137                                          | GPR137    | 717722    |
| G protein-coupled receptor 143                                          | GPR143    | 709148    |
| G protein-coupled receptor 151                                          | GPR151    | 708020    |
| G protein-coupled receptor 156                                          | GPR156    | 713174    |
| G protein-coupled receptor 161                                          | GPR161    | 698934    |
| G protein-coupled receptor 162                                          | GPR162    | 100428264 |
| G protein-coupled receptor 173                                          | GPR173    | 698645    |
| G protein-coupled receptor 19                                           | GPR19     | 697072    |
| G protein-coupled receptor 3                                            | GPR3      | 716033    |
| G protein-coupled receptor 31                                           | GPR31     | 717158    |
| G protein-coupled receptor 37 (endothelin receptor type B-like)         | GPR37     | 696628    |
| G protein-coupled receptor 87                                           | GPR87     | 709766    |
| G protein-coupled receptor 89A                                          | GPR89A    | 696579    |
| G protein-coupled receptor kinase 6                                     | GRK6      | 700000    |
| G protein-coupled receptor kinase interacting arfgap 2                  | GIT2      | 708092    |
| G protein-coupled receptor, class C, group 5, member C                  | GPRC5C    | 697446    |
| G2/M-phase specific E3 ubiquitin protein ligase                         | G2E3      | 717021    |
| GA binding protein transcription factor, beta subunit 1                 | GABPB1    | 715334    |
| GABA(A) receptor-associated protein                                     | GABARAP   | 714597    |
| GABA(A) receptor-associated protein like 2                              | GABARAPL2 | 714413    |
| Galactosidase alpha                                                     | GLA       | 703129    |
| Galactosylceramidase                                                    | GALC      | 693322    |
| Galanin receptor 3                                                      | GALR3     | 701727    |
| Galanin/GMAP prepropeptide                                              | GAL       | 721572    |
| Gametogenetin binding protein 2                                         | GGNBP2    | 713750    |
| Gamma-aminobutyric acid (GABA) B receptor, 1                            | GABBR1    | 708987    |
| Gamma-glutamyl hydrolase (conjugase, folylpolygamma glutamyl hydrolase) | GGH       | 700747    |

|                                                          |         |           |
|----------------------------------------------------------|---------|-----------|
| Gamma-glutamylcyclotransferase                           | GGCT    | 695547    |
| Ganglioside induced differentiation associated protein 1 | GDAP1   | 697136    |
| Ganglioside induced differentiation associated protein 2 | GDAP2   | 705994    |
| Gap junction protein alpha 1                             | GJA1    | 714344    |
| Gap junction protein alpha 4                             | GJA4    | 710913    |
| Gap junction protein beta 4                              | GJB4    | 710994    |
| Gap junction protein gamma 1                             | GJC1    | 715463    |
| GATA binding protein 2                                   | GATA2   | 705551    |
| GCN1, eif2 alpha kinase activator homolog                | GCN1    | 698528    |
| GC-rich promoter binding protein 1                       | GPBP1   | 708322    |
| GC-rich promoter binding protein 1-like 1                | GPBP1L1 | 706690    |
| GDP dissociation inhibitor 2                             | GDI2    | 712510    |
| GDP-mannose 4,6-dehydratase                              | GMDS    | 707051    |
| GDP-mannose pyrophosphorylase A                          | GMPPA   | 703756    |
| GDP-mannose pyrophosphorylase B                          | GMPPB   | 705454    |
| Gelsolin                                                 | GSN     | 699705    |
| GEM interacting protein                                  | GMIP    | 720380    |
| Gem nuclear organelle associated protein 2               | GEMIN2  | 698881    |
| General transcription factor IIA 2                       | GTF2A2  | 702984    |
| General transcription factor IIB                         | GTF2B   | 694770    |
| General transcription factor IIE subunit 2               | GTF2E2  | 694622    |
| General transcription factor IIF subunit 2               | GTF2F2  | 701668    |
| General transcription factor IIH subunit 5               | GTF2H5  | 700107    |
| General transcription factor IIIA                        | GTF3A   | 710492    |
| General transcription factor IIIC subunit 1              | GTF3C1  | 703998    |
| General transcription factor IIIC subunit 4              | GTF3C4  | 714849    |
| General transcription factor IIIC subunit 6              | GTF3C6  | 696512    |
| Geranylgeranyl diphosphate synthase 1                    | GGPS1   | 100425248 |
| Germ cell-less, spermatogenesis associated 1             | GMCL1   | 701545    |
| GID complex subunit 4 homolog                            | GID4    | 699842    |
| GID complex subunit 8                                    | GID8    | 698189    |
| Gigaxonin                                                | GAN     | 713996    |
| GIN5 complex subunit 2 (Psf2 homolog)                    | GIN52   | 693426    |
| GIPC PDZ domain containing family member 1               | GIPC1   | 717785    |
| GLE1, RNA export mediator                                | GLE1    | 717474    |
| GLI family zinc finger 1                                 | GLI1    | 714843    |
| Glomulin, FKBP associated protein                        | GLMN    | 706249    |
| Glucan (1,4-alpha-), branching enzyme 1                  | GBE1    | 722884    |
| Glucokinase (hexokinase 4)                               | GCK     | 699728    |
| Glucokinase (hexokinase 4) regulator                     | GCKR    | 701431    |
| Glucosamine-6-phosphate deaminase 1                      | GNPDA1  | 703036    |
| Glucose 6 phosphatase, catalytic, 3                      | G6PC3   | 714276    |
| Glucose-6-phosphate dehydrogenase                        | G6PD    | 701137    |
| Glucose-fructose oxidoreductase domain containing 1      | GFOD1   | 700607    |
| Glucosidase, alpha; neutral C                            | GANC    | 708126    |
| Glucosidase, beta (bile acid) 2                          | GBA2    | 696062    |
| Glutamate receptor, ionotropic, AMPA 2                   | GRIA2   | 574344    |
| Glutamate receptor, ionotropic, N-methyl D-aspartate-    | GRINA   | 708234    |

|                                                                       |         |           |
|-----------------------------------------------------------------------|---------|-----------|
| associated protein 1 (glutamate binding)                              |         |           |
| Glutamate rich 6                                                      | ERICH6  | 710313    |
| Glutamate-cysteine ligase, catalytic subunit                          | GCLC    | 710508    |
| Glutamic-oxaloacetic transaminase 2                                   | GOT2    | 707896    |
| Glutamic-pyruvate transaminase (alanine aminotransferase)             | GPT     | 703122    |
| Glutaminase                                                           | GLS     | 693520    |
| Glutamine--fructose-6-phosphate transaminase 1                        | GFPT1   | 574376    |
| Glutamine-fructose-6-phosphate transaminase 2                         | GFPT2   | 715826    |
| Glutaminyl-trna synthetase                                            | QARS    | 708111    |
| Glutaredoxin                                                          | GLRX    | 698997    |
| Glutaredoxin 2                                                        | GLRX2   | 712396    |
| Glutaredoxin 5                                                        | GLRX5   | 702989    |
| Glutaryl-coa dehydrogenase                                            | GCDH    | 716935    |
| Glutathione peroxidase 1                                              | GPX1    | 706732    |
| Glutathione peroxidase 4                                              | GPX4    | 705333    |
| Glutathione peroxidase 7                                              | GPX7    | 715474    |
| Glutathione peroxidase 8 (putative)                                   | GPX8    | 705965    |
| Glutathione S-transferase alpha 2                                     | GSTA2   | 709037    |
| Glutathione S-transferase alpha 4                                     | GSTA4   | 709666    |
| Glutathione S-transferase mu 2 (muscle)                               | GSTM2   | 700053    |
| Glutathione S-transferase omega 1                                     | GSTO1   | 716078    |
| Glutathione S-transferase omega 2                                     | GSTO2   | 715291    |
| Glutathione S-transferase pi 1                                        | GSTP1   | 721704    |
| Glutathione S-transferase, C-terminal domain containing               | GSTCD   | 694220    |
| Glyceraldehyde-3-phosphate dehydrogenase                              | GAPDH   | 574353    |
| Glycerol kinase 2                                                     | GK2     | 696635    |
| Glycerol-3-phosphate acyltransferase, mitochondrial                   | GPAM    | 696042    |
| Glycerophosphodiester phosphodiesterase domain containing 5           | GDPD5   | 695518    |
| Glycine amidinotransferase (L-arginine:glycine amidinotransferase)    | GATM    | 713306    |
| Glycine dehydrogenase (decarboxylating)                               | GLDC    | 715563    |
| Glycine receptor beta                                                 | GLRB    | 700368    |
| Glycophorin C (Gerbich blood group)                                   | GYPC    | 712092    |
| Glycoprotein hormone alpha 2                                          | GPHA2   | 717261    |
| Glycoprotein IX (platelet)                                            | GP9     | 704202    |
| Glycoprotein M6B                                                      | GPM6B   | 711762    |
| Glycosylphosphatidylinositol anchor attachment 1                      | GPAA1   | 699887    |
| Glycosyltransferase 8 domain containing 1                             | GLT8D1  | 695999    |
| Glycosyltransferase 8 domain containing 2                             | GLT8D2  | 699937    |
| Glycosyltransferase like domain containing 1                          | GTDC1   | 100424584 |
| Golgi phosphoprotein 3-like                                           | GOLPH3L | 707858    |
| Golgi reassembly stacking protein 2                                   | GORASP2 | 694170    |
| Golgi-associated, gamma adaptin ear containing, ARF binding protein 1 | GGA1    | 697929    |
| Golgi-associated, gamma adaptin ear containing, ARF binding protein 3 | GGA3    | 705751    |
| Golgin A7                                                             | GOLGA7  | 709911    |
| Golgin B1                                                             | GOLGB1  | 713993    |

|                                                                             |          |        |
|-----------------------------------------------------------------------------|----------|--------|
| Gonadotropin releasing hormone 1                                            | GNRH1    | 613033 |
| G-patch domain containing 3                                                 | GPATCH3  | 715116 |
| G-protein signaling modulator 3                                             | GPSM3    | 717356 |
| Grancalcin                                                                  | GCA      | 702138 |
| Granulysin                                                                  | GNLY     | 696059 |
| GRB2 associated binding protein 1                                           | GAB1     | 700367 |
| GRB2-related adaptor protein                                                | GRAP     | 702473 |
| Gremlin 2, DAN family BMP antagonist                                        | GREM2    | 708280 |
| Growth arrest and DNA damage inducible beta                                 | GADD45B  | 711257 |
| Growth arrest and DNA damage inducible gamma                                | GADD45G  | 697835 |
| Growth arrest specific 2 like 1                                             | GAS2L1   | 714530 |
| Growth arrest specific 6                                                    | GAS6     | 716066 |
| Growth associated protein 43                                                | GAP43    | 711260 |
| Growth differentiation factor 7                                             | GDF7     | 702462 |
| Growth factor receptor bound protein 10                                     | GRB10    | 694786 |
| Growth hormone inducible transmembrane protein                              | GHITM    | 702691 |
| Growth hormone secretagogue receptor                                        | GHSR     | 694587 |
| GRP1 (general receptor for phosphoinositides 1)-associated scaffold protein | GRASP    | 696547 |
| GTF2I repeat domain containing 1                                            | GTF2IRD1 | 693935 |
| GTP binding protein 2                                                       | GTPBP2   | 700913 |
| Gtpase activating protein (SH3 domain) binding protein 1                    | G3BP1    | 713884 |
| Gtpase, IMAP family member 4                                                | GIMAP4   | 713506 |
| Guanidinoacetate N-methyltransferase                                        | GAMT     | 721263 |
| Guanine nucleotide binding protein (G protein), alpha 11 (Gq class)         | GNA11    | 721649 |
| Guanine nucleotide binding protein (G protein), beta polypeptide 1          | GNB1     | 703399 |
| Guanine nucleotide binding protein (G protein), beta polypeptide 2-like 1   | GNB2L1   | 708526 |
| Guanine nucleotide binding protein (G protein), beta polypeptide 3          | GNB3     | 713913 |
| Guanine nucleotide binding protein (G protein), gamma 10                    | GNG10    | 708193 |
| Guanine nucleotide binding protein (G protein), gamma 11                    | GNG11    | 700606 |
| Guanine nucleotide binding protein (G protein), q polypeptide               | GNAQ     | 705680 |
| Guanosine monophosphate reductase 2                                         | GMPR2    | 715719 |
| Guanylate cyclase 1, soluble, alpha 2                                       | GUCY1A2  | 706615 |
| Guanylate cyclase activator 1A                                              | GUCA1A   | 695552 |
| Guanylate kinase 1                                                          | GUK1     | 695272 |
| GULP, engulfment adaptor PTB domain containing 1                            | GULP1    | 708601 |
| H2A histone family, member X                                                | H2AFX    | 703073 |
| H2A histone family, member Y                                                | H2AFY    | 711836 |
| H2A histone family, member Y2                                               | H2AFY2   | 711117 |
| H2A histone family, member Z                                                | H2AFZ    | 709326 |
| Haloacid dehalogenase like hydrolase domain containing 2                    | HDHD2    | 697216 |
| HAUS augmin like complex subunit 4                                          | HAUS4    | 717252 |
| HAUS augmin like complex subunit 8                                          | HAUS8    | 718874 |
| Hdc homolog, cell cycle regulator                                           | HECA     | 702628 |

|                                                                |           |        |
|----------------------------------------------------------------|-----------|--------|
| HEAT repeat containing 6                                       | HEATR6    | 720089 |
| HEAT repeat containing 9                                       | HEATR9    | 716382 |
| Heat shock factor binding protein 1                            | HSBP1     | 714498 |
| Heat shock protein 90kda alpha (cytosolic), class A member 1   | HSP90AA1  | 708431 |
| Heat shock protein 90kda alpha family class B member 1         | HSP90AB1  | 702293 |
| Heat shock protein 90kda beta family member 1                  | HSP90B1   | 699568 |
| Heat shock protein family A (Hsp70) member 8                   | HSPA8     | 707989 |
| Heat shock protein family B (small) member 11                  | HSPB11    | 714791 |
| Heat shock protein family B (small) member 6                   | HSPB6     | 710760 |
| Heat shock protein family D (Hsp60) member 1                   | HSPD1     | 698024 |
| Heat shock protein family H (Hsp110) member 1                  | HSPH1     | 721956 |
| Heat shock transcription factor 2                              | HSF2      | 713938 |
| HECT and RLD domain containing E3 ubiquitin protein ligase 3   | HERC3     | 703108 |
| HECT and RLD domain containing E3 ubiquitin protein ligase 4   | HERC4     | 695571 |
| HECT domain containing E3 ubiquitin protein ligase 1           | HECTD1    | 717177 |
| HECT domain containing E3 ubiquitin protein ligase 2           | HECTD2    | 697258 |
| HECT domain containing E3 ubiquitin protein ligase 3           | HECTD3    | 705051 |
| Helicase (DNA) B                                               | HELB      | 717860 |
| Helicase, lymphoid-specific                                    | HELLS     | 701598 |
| Hematological and neurological expressed 1                     | HN1       | 664729 |
| Hematological and neurological expressed 1-like                | HN1L      | 702283 |
| Hematopoietic prostaglandin D synthase                         | HPGDS     | 705227 |
| Heme binding protein 1                                         | HEBP1     | 697821 |
| Heme binding protein 2                                         | HEBP2     | 709176 |
| Heme oxygenase 2                                               | HMOX2     | 705461 |
| Hemoglobin subunit epsilon 1                                   | HBE1      | 715414 |
| Hemoglobin, beta                                               | HBB       | 715559 |
| Hemoglobin, gamma G                                            | HBG2      | 715368 |
| HEN1 methyltransferase homolog 1 (Arabidopsis)                 | HENMT1    | 698896 |
| Hepatic leukemia factor                                        | HLF       | 706623 |
| Hepatocyte growth factor-regulated tyrosine kinase substrate   | HGS       | 714385 |
| Hepcidin antimicrobial peptide                                 | HAMP      | 708397 |
| Hermansky-Pudlak syndrome 6                                    | HPS6      | 712574 |
| Hes family bhlh transcription factor 7                         | HES7      | 721942 |
| Hes-related family bhlh transcription factor with YRPW motif 2 | HEY2      | 712988 |
| HESX homeobox 1                                                | HESX1     | 704551 |
| Heterogeneous nuclear ribonucleoprotein A/B                    | HNRNPAB   | 702509 |
| Heterogeneous nuclear ribonucleoprotein A1                     | HNRNPA1   | 702977 |
| Heterogeneous nuclear ribonucleoprotein A2/B1                  | HNRNPA2B1 | 701821 |
| Heterogeneous nuclear ribonucleoprotein C (C1/C2)              | HNRNPC    | 706423 |
| Heterogeneous nuclear ribonucleoprotein D                      | HNRNPD    | 694867 |
| Heterogeneous nuclear ribonucleoprotein D like                 | HNRNPDL   | 694603 |
| Heterogeneous nuclear ribonucleoprotein H2 (H')                | HNRNPH2   | 703254 |
| Heterogeneous nuclear ribonucleoprotein L                      | HNRNPL    | 694448 |
| Heterogeneous nuclear ribonucleoprotein L-like                 | HNRNPLL   | 710841 |
| Hexamethylene bis-acetamide inducible 2                        | HEXIM2    | 716047 |
| Hexokinase domain containing 1                                 | HKDC1     | 711995 |
| Hexose-6-phosphate dehydrogenase (glucose 1-dehydrogenase)     | H6PD      | 710107 |

|                                                                                                                  |           |        |
|------------------------------------------------------------------------------------------------------------------|-----------|--------|
| HIG1 hypoxia inducible domain family member 1B                                                                   | HIGD1B    | 715566 |
| HIG1 hypoxia inducible domain family member 2A                                                                   | HIGD2A    | 696888 |
| High mobility group box 3                                                                                        | HMGB3     | 703598 |
| Highly divergent homeobox                                                                                        | HDX       | 710427 |
| Hippocalcin                                                                                                      | HPCA      | 710249 |
| HIRA interacting protein 3                                                                                       | HIRIP3    | 708004 |
| Histidine triad nucleotide binding protein 1                                                                     | HINT1     | 706083 |
| Histidyl-trna synthetase 2                                                                                       | HARS2     | 697009 |
| Histocompatibility (minor) 13                                                                                    | HM13      | 713216 |
| Histone cluster 1, h2aj                                                                                          | HIST1H2AJ | 704127 |
| Histone deacetylase 3                                                                                            | HDAC3     | 704467 |
| Histone deacetylase 5                                                                                            | HDAC5     | 711456 |
| Histone H4 transcription factor                                                                                  | HINFP     | 703763 |
| HMG-box transcription factor 1                                                                                   | HBP1      | 699237 |
| Holliday junction recognition protein                                                                            | HJURP     | 718180 |
| Homeobox A9                                                                                                      | HOXA9     | 699729 |
| Homeobox D10                                                                                                     | HOXD10    | 700318 |
| Homeodomain interacting protein kinase 1                                                                         | HIPK1     | 707856 |
| Homer scaffolding protein 3                                                                                      | HOMER3    | 719647 |
| Homocysteine-inducible, endoplasmic reticulum stress-inducible, ubiquitin-like domain member 1                   | HERPUD1   | 703210 |
| Homogentisate 1,2-dioxygenase                                                                                    | HGD       | 713499 |
| Hook microtubule-tethering protein 1                                                                             | HOOK1     | 693504 |
| HRAS like suppressor family member 5                                                                             | HRASLS5   | 718317 |
| Htra serine peptidase 2                                                                                          | HTRA2     | 709938 |
| Htra serine peptidase 4                                                                                          | HTRA4     | 700875 |
| HUS1 checkpoint clamp component                                                                                  | HUS1      | 699541 |
| Hyaluronan and proteoglycan link protein 3                                                                       | HAPLN3    | 698880 |
| Hyaluronan synthase 3                                                                                            | HAS3      | 704121 |
| Hyaluronoglucosaminidase 2                                                                                       | HYAL2     | 702484 |
| Hydrogen voltage gated channel 1                                                                                 | HVCN1     | 709745 |
| Hydroxyacyl-coa dehydrogenase/3-ketoacyl-coa thiolase/enoyl-coa hydratase (trifunctional protein), alpha subunit | HADHA     | 695975 |
| Hydroxysteroid (17-beta) dehydrogenase 10                                                                        | HSD17B10  | 700018 |
| Hydroxysteroid (17-beta) dehydrogenase 6                                                                         | HSD17B6   | 713549 |
| Hydroxysteroid (17-beta) dehydrogenase 8                                                                         | HSD17B8   | 718119 |
| Hydroxysteroid dehydrogenase like 1                                                                              | HSDL1     | 714962 |
| Hyperpolarization activated cyclic nucleotide gated potassium channel 3                                          | HCN3      | 717719 |
| Hypocretin (orexin) neuropeptide precursor                                                                       | HCRT      | 709564 |
| Hypoxia inducible factor 1, alpha subunit (basic helix-loop-helix transcription factor)                          | HIF1A     | 704678 |
| Hypoxia inducible lipid droplet-associated                                                                       | HILPDA    | 701261 |
| Hypoxia up-regulated 1                                                                                           | HYOU1     | 707715 |
| Idnk, gluconokinase homolog (E. Coli)                                                                            | IDNK      | 708613 |
| IKAROS family zinc finger 2                                                                                      | IKZF2     | 693521 |
| IKAROS family zinc finger 5                                                                                      | IKZF5     | 716950 |
| ILK associated serine/threonine phosphatase                                                                      | ILKAP     | 706334 |

|                                                                            |          |           |
|----------------------------------------------------------------------------|----------|-----------|
| Immunoglobulin superfamily member 1                                        | IGSF1    | 704264    |
| Immunoglobulin superfamily member 10                                       | IGSF10   | 709661    |
| Immunoglobulin superfamily member 6                                        | IGSF6    | 699485    |
| IMP (inosine 5'-monophosphate) dehydrogenase 1                             | IMPDH1   | 701039    |
| IMP3, U3 small nucleolar ribonucleoprotein                                 | IMP3     | 706202    |
| Importin 8                                                                 | IPO8     | 693514    |
| Increased sodium tolerance 1 homolog (yeast)                               | IST1     | 707245    |
| Influenza virus NS1A binding protein                                       | IVNS1ABP | 714152    |
| Inhibin alpha                                                              | INHA     | 574379    |
| Inhibitor of DNA binding 1, dominant negative helix-loop-helix protein     | ID1      | 713160    |
| Inhibitor of growth family member 2                                        | ING2     | 701839    |
| Inhibitor of growth family member 4                                        | ING4     | 722073    |
| Inhibitor of kappa light polypeptide gene enhancer in B-cells, kinase beta | IKBKB    | 704683    |
| INO80 complex subunit C                                                    | INO80C   | 708819    |
| Inosine triphosphatase                                                     | ITPA     | 717257    |
| Inositol 1,4,5-trisphosphate receptor interacting protein-like 1           | ITPRIPL1 | 705560    |
| Inositol hexakisphosphate kinase 1                                         | IP6K1    | 705576    |
| Inositol monophosphatase domain containing 1                               | IMPAD1   | 696893    |
| Inositol polyphosphate multikinase                                         | IPMK     | 703630    |
| Inositol polyphosphate phosphatase like 1                                  | INPPL1   | 718421    |
| Inositol polyphosphate-1-phosphatase                                       | INPP1    | 703301    |
| Inositol polyphosphate-4-phosphatase type II B                             | INPP4B   | 699738    |
| Inositol(myo)-1(or 4)-monophosphatase 2                                    | IMPA2    | 704320    |
| Inositol-trisphosphate 3-kinase A                                          | ITPKA    | 710541    |
| Insulin like 3                                                             | INSL3    | 100533192 |
| Insulin like 4                                                             | INSL4    | 693911    |
| Insulin like growth factor binding protein 3                               | IGFBP3   | 696868    |
| Insulin like growth factor binding protein 5                               | IGFBP5   | 696339    |
| Insulin like growth factor binding protein 7                               | IGFBP7   | 693564    |
| Integral membrane protein 2A                                               | ITM2A    | 708039    |
| Integral membrane protein 2C                                               | ITM2C    | 711245    |
| Integrator complex subunit 10                                              | INTS10   | 705240    |
| Integrator complex subunit 12                                              | INTS12   | 694344    |
| Integrator complex subunit 2                                               | INTS2    | 712351    |
| Integrator complex subunit 4                                               | INTS4    | 699466    |
| Integrator complex subunit 8                                               | INTS8    | 700255    |
| Integrin alpha FG-GAP repeat containing 1                                  | ITFG1    | 716435    |
| Integrin linked kinase                                                     | ILK      | 709944    |
| Integrin subunit alpha 1                                                   | ITGA1    | 703456    |
| Integrin subunit alpha 10                                                  | ITGA10   | 100428480 |
| Integrin subunit alpha 4                                                   | ITGA4    | 704745    |
| Integrin subunit beta 7                                                    | ITGB7    | 699405    |
| Integrin subunit beta 8                                                    | ITGB8    | 707247    |
| Interactor of little elongation complex ELL subunit 1                      | ICE1     | 710176    |
| Intercellular adhesion molecule 2                                          | ICAM2    | 574158    |
| Interferon induced protein with tetratricopeptide repeats 2                | IFIT2    | 695452    |

|                                                         |         |        |
|---------------------------------------------------------|---------|--------|
| Interferon induced, with helicase C domain 1            | IFIH1   | 702024 |
| Interferon regulatory factor 1                          | IRF1    | 707788 |
| Interferon regulatory factor 2                          | IRF2    | 694347 |
| Interferon regulatory factor 2 binding protein 1        | IRF2BP1 | 715611 |
| Interferon stimulated exonuclease gene 20kda            | ISG20   | 698376 |
| Interferon, alpha 13                                    | IFNA13  | 709559 |
| Interferon, lambda receptor 1                           | IFNLR1  | 711625 |
| Interferon-related developmental regulator 1            | IFRD1   | 702624 |
| Interferon-related developmental regulator 2            | IFRD2   | 702959 |
| Interleukin 17 receptor A                               | IL17RA  | 709005 |
| Interleukin 2 receptor subunit gamma                    | IL2RG   | 641338 |
| Interleukin 20 receptor subunit beta                    | IL20RB  | 716769 |
| Interleukin 6                                           | IL6     | 705819 |
| Interleukin enhancer binding factor 2                   | ILF2    | 715452 |
| Interleukin enhancer binding factor 3                   | ILF3    | 713427 |
| Intermediate filament family orphan 1                   | IFFO1   | 712900 |
| Internexin neuronal intermediate filament protein alpha | INA     | 714455 |
| Intestine-specific homeobox                             | ISX     | 717448 |
| Intraflagellar transport 172                            | IFT172  | 700948 |
| Intraflagellar transport 20                             | IFT20   | 715773 |
| Intraflagellar transport 22                             | IFT22   | 714551 |
| Intraflagellar transport 27                             | IFT27   | 697032 |
| Intraflagellar transport 46                             | IFT46   | 700582 |
| Intraflagellar transport 57                             | IFT57   | 705088 |
| Intraflagellar transport 74                             | IFT74   | 707561 |
| Intraflagellar transport 80                             | IFT80   | 705146 |
| Inturned planar cell polarity protein                   | INTU    | 709967 |
| IQ motif and Sec7 domain 1                              | IQSEC1  | 693922 |
| IQ motif containing B1                                  | IQCB1   | 715032 |
| IQ motif containing K                                   | IQCK    | 695417 |
| IQ motif containing with AAA domain 1                   | IQCA1   | 694173 |
| Iron responsive element binding protein 2               | IREB2   | 710239 |
| Iron-sulfur cluster assembly 2                          | ISCA2   | 700004 |
| Iron-sulfur cluster assembly enzyme                     | ISCU    | 705669 |
| Iroquois homeobox 6                                     | IRX6    | 698232 |
| Isocitrate dehydrogenase 2 (NADP+), mitochondrial       | IDH2    | 701480 |
| Isocitrate dehydrogenase 3 (NAD+) alpha                 | IDH3A   | 677715 |
| Isocitrate dehydrogenase 3 (NAD+) beta                  | IDH3B   | 716726 |
| Isocitrate dehydrogenase 3 (NAD+) gamma                 | IDH3G   | 698558 |
| Isoleucyl-trna synthetase                               | IARS    | 677705 |
| IWS1 homolog (S. Cerevisiae)                            | IWS1    | 699205 |
| Izumo sperm-egg fusion 1                                | IZUMO1  | 718234 |
| Jade family PHD finger 1                                | JADE1   | 693690 |
| Jade family PHD finger 3                                | JADE3   | 711390 |
| Janus kinase 1                                          | JAK1    | 677689 |
| JAZF zinc finger 1                                      | JAZF1   | 697973 |
| JNK1/MAPK8-associated membrane protein                  | JKAMP   | 702307 |
| Jumonji domain containing 1C                            | JMJD1C  | 697630 |



|                                                         |           |           |
|---------------------------------------------------------|-----------|-----------|
| Jumping translocation breakpoint                        | JTB       | 718537    |
| Kallikrein 3                                            | KLK3      | 719444    |
| Kallikrein related peptidase 8                          | KLK8      | 719488    |
| Kaptein (actin binding protein)                         | KPTN      | 717322    |
| Karyopherin alpha 2 (RAG cohort 1, importin alpha 1)    | KPNA2     | 100430008 |
| Karyopherin alpha 4 (importin alpha 3)                  | KPNA4     | 702486    |
| Karyopherin alpha 6 (importin alpha 7)                  | KPNA6     | 706812    |
| KAT8 regulatory NSL complex subunit 1                   | KANSL1    | 717172    |
| Katanin p60 (ATPase containing) subunit A 1             | KATNA1    | 698291    |
| KDEL endoplasmic reticulum protein retention receptor 1 | KDELR1    | 717928    |
| KDEL endoplasmic reticulum protein retention receptor 2 | KDELR2    | 704335    |
| KDEL endoplasmic reticulum protein retention receptor 3 | KDELR3    | 700810    |
| KDEL motif containing 1                                 | KDELC1    | 702156    |
| Kelch domain containing 10                              | KLHDC10   | 702290    |
| Kelch domain containing 4                               | KLHDC4    | 695768    |
| Kelch domain containing 9                               | KLHDC9    | 719863    |
| Kelch like family member 11                             | KLHL11    | 708393    |
| Kelch like family member 22                             | KLHL22    | 694160    |
| Kelch like family member 26                             | KLHL26    | 719583    |
| Kelch like family member 28                             | KLHL28    | 702075    |
| Kelch like family member 3                              | KLHL3     | 713123    |
| Kelch like family member 32                             | KLHL32    | 709276    |
| Kelch like family member 41                             | KLHL41    | 706047    |
| Kelch like family member 5                              | KLHL5     | 698740    |
| Kelch like family member 7                              | KLHL7     | 705349    |
| Kelch repeat and BTB (POZ) domain containing 4          | KBTBD4    | 711452    |
| Kelch repeat and BTB (POZ) domain containing 8          | KBTBD8    | 699158    |
| Kell blood group, metallo-endorpeptidase                | KEL       | 703492    |
| Keratin 2, type II                                      | KRT2      | 699567    |
| Keratin 7, type II                                      | KRT7      | 697425    |
| Keratin 80, type II                                     | KRT80     | 697190    |
| Keratin associated protein 12-4                         | KRTAP12-4 | 712284    |
| Keratin associated protein 19-3                         | KRTAP19-3 | 703677    |
| Keratinocyte associated protein 3                       | KRTCAP3   | 701066    |
| KH homology domain containing 1                         | KHDC1     | 715576    |
| KIAA0100 ortholog                                       | KIAA0100  | 709307    |
| KIAA0226-like ortholog                                  | KIAA0226L | 703875    |
| KIAA0232 ortholog                                       | KIAA0232  | 710141    |
| KIAA0895 ortholog                                       | KIAA0895  | 706527    |
| KIAA0907 ortholog                                       | KIAA0907  | 718005    |
| KIAA0922 ortholog                                       | KIAA0922  | 696761    |
| KIAA1024 ortholog                                       | KIAA1024  | 712078    |
| KIAA1033 ortholog                                       | KIAA1033  | 701501    |
| KIAA1143 ortholog                                       | KIAA1143  | 714979    |
| KIAA1524 ortholog                                       | KIAA1524  | 705690    |
| KIAA1958 ortholog                                       | KIAA1958  | 707028    |
| KIAA2013 ortholog                                       | KIAA2013  | 722762    |
| Killer cell lectin-like receptor subfamily F, member 1  | KLRF1     | 574389    |

|                                                             |           |           |
|-------------------------------------------------------------|-----------|-----------|
| Killer-cell Ig-like receptor KIR3DL12                       | KIR3DL12  | 100125560 |
| Kin17 DNA and RNA binding protein                           | KIN       | 713634    |
| Kinase D-interacting substrate 220kda                       | KIDINS220 | 693522    |
| Kinesin family member 16B                                   | KIF16B    | 695167    |
| Kinesin family member 22                                    | KIF22     | 706401    |
| Kinesin family member 23                                    | KIF23     | 695229    |
| Kinesin family member 2C                                    | KIF2C     | 705381    |
| Kinesin family member 9                                     | KIF9      | 711742    |
| Kinesin family member C3                                    | KIFC3     | 705951    |
| Kinesin heavy chain member 2A                               | KIF2A     | 696561    |
| Kinesin light chain 2                                       | KLC2      | 714643    |
| Kinesin light chain 4                                       | KLC4      | 698356    |
| Kininogen 1                                                 | KNG1      | 707466    |
| Kizuna centrosomal protein                                  | KIZ       | 700808    |
| KN motif and ankyrin repeat domains 1                       | KANK1     | 697569    |
| KRAB-A domain containing 1                                  | KRBA1     | 711863    |
| Kruppel-like factor 10                                      | KLF10     | 693458    |
| Kruppel-like factor 11                                      | KLF11     | 702323    |
| Kruppel-like factor 15                                      | KLF15     | 716386    |
| Kruppel-like factor 7 (ubiquitous)                          | KLF7      | 708487    |
| Kruppel-like factor 8                                       | KLF8      | 704591    |
| Kv channel interacting protein 2                            | KCNIP2    | 712434    |
| Kv channel interacting protein 3, calsenilin                | KCNIP3    | 704307    |
| Kxdl motif containing 1                                     | KXD1      | 720235    |
| L-2-hydroxyglutarate dehydrogenase                          | L2HGDH    | 705721    |
| La ribonucleoprotein domain family member 1B                | LARP1B    | 693747    |
| La ribonucleoprotein domain family member 6                 | LARP6     | 699664    |
| La ribonucleoprotein domain family member 7                 | LARP7     | 703731    |
| Lactate dehydrogenase B                                     | LDHB      | 706110    |
| Lamin B receptor                                            | LBR       | 700801    |
| Laminin subunit alpha 2                                     | LAMA2     | 715394    |
| Lanc lantibiotic synthetase component C-like 2 (bacterial)  | LANCL2    | 704882    |
| Large tumor suppressor kinase 1                             | LATS1     | 696131    |
| Late cornified envelope 4A                                  | LCE4A     | 100423936 |
| Late endosomal/lysosomal adaptor, MAPK and MTOR activator 1 | LAMTOR1   | 718249    |
| Late endosomal/lysosomal adaptor, MAPK and MTOR activator 3 | LAMTOR3   | 709133    |
| Latexin                                                     | LXN       | 703996    |
| Layilin                                                     | LAYN      | 710211    |
| LCK proto-oncogene, Src family tyrosine kinase              | LCK       | 717704    |
| LDL receptor related protein 1                              | LRP1      | 710965    |
| LDL receptor related protein 11                             | LRP11     | 697652    |
| LDL receptor related protein 3                              | LRP3      | 703776    |
| LDL receptor related protein 6                              | LRP6      | 695843    |
| Lectin, galactoside-binding, soluble, 14                    | LGALS14   | 698227    |
| Lectin, galactoside-binding, soluble, 4                     | LGALS4    | 694195    |
| Lectin, mannose-binding, 1                                  | LMAN1     | 697449    |
| LEM domain containing 2                                     | LEMD2     | 718463    |
| Leucine rich repeat and coiled-coil centrosomal protein 1   | LRRCC1    | 707964    |

|                                                                                          |        |           |
|------------------------------------------------------------------------------------------|--------|-----------|
| Leucine rich repeat and fibronectin type III domain containing 3                         | LRFN3  | 711565    |
| Leucine rich repeat and fibronectin type III domain containing 4                         | LRFN4  | 713166    |
| Leucine rich repeat containing 14                                                        | LRRC14 | 703587    |
| Leucine rich repeat containing 18                                                        | LRRC18 | 710785    |
| Leucine rich repeat containing 20                                                        | LRRC20 | 710594    |
| Leucine rich repeat containing 28                                                        | LRRC28 | 708649    |
| Leucine rich repeat containing 39                                                        | LRRC39 | 711471    |
| Leucine rich repeat containing 40                                                        | LRRC40 | 702565    |
| Leucine rich repeat containing 42                                                        | LRRC42 | 714839    |
| Leucine rich repeat containing 45                                                        | LRRC45 | 715420    |
| Leucine rich repeat containing 49                                                        | LRRC49 | 696391    |
| Leucine rich repeat containing 56                                                        | LRRC56 | 698952    |
| Leucine rich repeat containing 57                                                        | LRRC57 | 711785    |
| Leucine rich repeat protein 1                                                            | LRR1   | 706658    |
| Leucine zipper and CTNNBIP1 domain containing                                            | LZIC   | 712335    |
| Leucine zipper, down-regulated in cancer 1                                               | LDOC1  | 696902    |
| Leucine zipper, down-regulated in cancer 1-like                                          | LDOC1L | 712760    |
| Leucine, glutamate and lysine rich 1                                                     | LEKR1  | 705456    |
| Leucine-rich repeat containing 8 family member D                                         | LRRC8D | 100423128 |
| Leucine-rich repeat containing G protein-coupled receptor 5                              | LGR5   | 718661    |
| Leucine-rich repeat kinase 1                                                             | LRRK1  | 694358    |
| Leucine-rich repeat LGI family member 4                                                  | LGI4   | 718426    |
| Leucine-rich repeats and calponin homology (CH) domain containing 2                      | LRCH2  | 708436    |
| Leucine-rich repeats and WD repeat domain containing 1                                   | LRWD1  | 715187    |
| Leukocyte immunoglobulin-like receptor, subfamily B (with TM and ITIM domains), member 1 | LILRB1 | 692340    |
| Leukocyte-associated immunoglobulin-like receptor 1                                      | LAIR1  | 695533    |
| Leukotriene A4 hydrolase                                                                 | LTA4H  | 713038    |
| Leukotriene C4 synthase                                                                  | LTC4S  | 705233    |
| Leupaxin                                                                                 | LPXN   | 702033    |
| LFNG O-fucosylpeptide 3-beta-N-acetylglucosaminyltransferase                             | LFNG   | 100428736 |
| Ligand dependent nuclear receptor interacting factor 1                                   | LRIF1  | 702445    |
| Ligand of numb-protein X 1, E3 ubiquitin protein ligase                                  | LNK1   | 697862    |
| Ligase III, DNA, ATP-dependent                                                           | LIG3   | 715181    |
| Like-glycosyltransferase                                                                 | LARGE  | 717403    |
| LIM and SH3 protein 1                                                                    | LASP1  | 694950    |
| LIM domain containing 2                                                                  | LIMD2  | 717889    |
| LIM domain only 3                                                                        | LMO3   | 701893    |
| LIM homeobox 6                                                                           | LHX6   | 698587    |
| Limb bud and heart development                                                           | LBH    | 704749    |
| Lin-7 homolog B (C. Elegans)                                                             | LIN7B  | 718587    |
| Lin-9 DREAM muvb core complex component                                                  | LIN9   | 699056    |
| Lines homolog 1                                                                          | LINS1  | 693833    |
| Lipase A, lysosomal acid, cholesterol esterase                                           | LIPA   | 695240    |
| Lipase, hepatic                                                                          | LIPC   | 701116    |
| Lipase, member H                                                                         | LIPH   | 701743    |
| Lipid droplet associated hydrolase                                                       | LDAH   | 717510    |

|                                                                    |          |           |
|--------------------------------------------------------------------|----------|-----------|
| Lipocalin 1                                                        | LCN1     | 711974    |
| Lipocalin 6                                                        | LCN6     | 574148    |
| Lipoma HMGIC fusion partner                                        | LHFP     | 696978    |
| Lipoma HMGIC fusion partner-like 2                                 | LHFPL2   | 709040    |
| Lipoma HMGIC fusion partner-like 4                                 | LHFPL4   | 700973    |
| Lipoprotein lipase                                                 | LPL      | 712887    |
| Liver expressed antimicrobial peptide 2                            | LEAP2    | 709041    |
| LMBR1 domain containing 2                                          | LMBRD2   | 700369    |
| LON peptidase N-terminal domain and ring finger 1                  | LONRF1   | 706469    |
| Low density lipoprotein receptor class A domain containing 4       | LDLRAD4  | 701919    |
| LSM family member 14B                                              | LSM14B   | 700561    |
| LSM10, U7 small nuclear RNA associated                             | LSM10    | 713277    |
| LSM14A mrna processing body assembly factor                        | LSM14A   | 705085    |
| LSM2 homolog, U6 small nuclear RNA and mrna degradation associated | LSM2     | 715592    |
| LSM5 homolog, U6 small nuclear RNA and mrna degradation associated | LSM5     | 693550    |
| LSM6 homolog, U6 small nuclear RNA and mrna degradation associated | LSM6     | 703226    |
| LUC7-like 3 pre-mrna splicing factor                               | LUC7L3   | 703662    |
| Ly6/neurotoxin 1                                                   | LYNX1    | 100428512 |
| LY6/PLAUR domain containing 6                                      | LYPD6    | 693649    |
| Lymphocyte antigen 6 complex, locus G6C                            | LY6G6C   | 716220    |
| Lymphocyte antigen 86                                              | LY86     | 711507    |
| Lymphoid enhancer-binding factor 1                                 | LEF1     | 695776    |
| Lymphotoxin alpha                                                  | LTA      | 715425    |
| Lysine (K)-specific demethylase 1A                                 | KDM1A    | 718609    |
| Lysine (K)-specific demethylase 3A                                 | KDM3A    | 697775    |
| Lysine (K)-specific demethylase 4B                                 | KDM4B    | 695760    |
| Lysine (K)-specific demethylase 8                                  | KDM8     | 703323    |
| Lysine (K)-specific methyltransferase 5B                           | KMT5B    | 710481    |
| Lysine-rich nucleolar protein 1                                    | KNOP1    | 695144    |
| Lysophosphatidic acid receptor 6                                   | LPAR6    | 705081    |
| Lysophosphatidylcholine acyltransferase 3                          | LPCAT3   | 714639    |
| Lysophospholipase II                                               | LYPLA2   | 719074    |
| Lysosomal protein transmembrane 4 alpha                            | LAPTM4A  | 701298    |
| Lysyl oxidase                                                      | LOX      | 699997    |
| Lysyl oxidase like 1                                               | LOXL1    | 706464    |
| Lysyl oxidase like 3                                               | LOXL3    | 709834    |
| Lysyl-trna synthetase                                              | KARS     | 714516    |
| Mab-21-like 2 (C. Elegans)                                         | MAB21L2  | 693948    |
| MACRO domain containing 1                                          | MACROD1  | 717961    |
| Macrophage erythroblast attacher                                   | MAEA     | 702015    |
| MAD2L1 binding protein                                             | MAD2L1BP | 701099    |
| Maestro heat-like repeat family member 8                           | MROH8    | 701423    |
| MAGE family member D1                                              | MAGED1   | 696658    |
| MAGE family member F1                                              | MAGEF1   | 701676    |
| MAGE family member H1                                              | MAGEH1   | 703812    |

|                                                                                          |          |           |
|------------------------------------------------------------------------------------------|----------|-----------|
| Major facilitator superfamily domain containing 11                                       | MFSD11   | 707770    |
| Major facilitator superfamily domain containing 14A                                      | MFSD14A  | 711233    |
| Major facilitator superfamily domain containing 3                                        | MFSD3    | 703246    |
| Major facilitator superfamily domain containing 5                                        | MFSD5    | 702021    |
| Major histocompatibility complex, class II, DM beta                                      | MAMU-DMB | 100429856 |
| Major histocompatibility complex, class II, DP beta                                      | MAMU-DPB | 717969    |
| Malate dehydrogenase 1                                                                   | MDH1     | 694703    |
| Male-specific lethal 2 homolog (Drosophila)                                              | MSL2     | 717049    |
| Male-specific lethal 3 homolog (Drosophila)                                              | MSL3     | 720836    |
| Malonyl-coa-acyl carrier protein transacylase                                            | MCAT     | 711556    |
| Mannose phosphate isomerase                                                              | MPI      | 722129    |
| Mannosidase, alpha, class 2C, member 1                                                   | MAN2C1   | 705599    |
| Mannosyl (alpha-1,3-)-glycoprotein beta-1,4-N-acetyl glucosaminyl transferase, isozyme B | MGAT4B   | 705006    |
| Mannosyl (alpha-1,6-)-glycoprotein beta-1,2-N-acetyl glucosaminyl transferase            | MGAT2    | 706426    |
| Mannosyl-oligosaccharide glucosidase                                                     | MOGS     | 708913    |
| MANSC domain containing 1                                                                | MANSC1   | 696667    |
| MAP/microtubule affinity-regulating kinase 2                                             | MARK2    | 718065    |
| MAP7 domain containing 1                                                                 | MAP7D1   | 712899    |
| MAP-kinase activating death domain                                                       | MADD     | 713613    |
| MARCKS-like 1                                                                            | MARCKSL1 | 100428616 |
| Mast cell immunoglobulin-like receptor 1                                                 | MILR1    | 717835    |
| Mastermind like transcriptional coactivator 1                                            | MAML1    | 715047    |
| Matrilin 1, cartilage matrix protein                                                     | MATN1    | 704521    |
| Matrin 3                                                                                 | MATR3    | 100568448 |
| Matrix metalloproteinase 28                                                              | MMP28    | 574250    |
| MAX dimerization protein 1                                                               | MXD1     | 701784    |
| Mckusick-Kaufman syndrome                                                                | MKKS     | 718547    |
| Mdm1 nuclear protein                                                                     | MDM1     | 718062    |
| MDM2 binding protein                                                                     | MTBP     | 703121    |
| Mediator complex subunit 10                                                              | MED10    | 694872    |
| Mediator complex subunit 11                                                              | MED11    | 709561    |
| Mediator complex subunit 13-like                                                         | MED13L   | 713867    |
| Mediator complex subunit 19                                                              | MED19    | 704421    |
| Mediator complex subunit 21                                                              | MED21    | 710699    |
| Mediator complex subunit 23                                                              | MED23    | 714629    |
| Mediator complex subunit 27                                                              | MED27    | 715219    |
| Mediator complex subunit 6                                                               | MED6     | 693320    |
| Mediator complex subunit 8                                                               | MED8     | 700676    |
| Mediator complex subunit 9                                                               | MED9     | 698957    |
| Mediator of cell motility 1                                                              | MEMO1    | 706051    |
| Meiosis 1 associated protein                                                             | M1AP     | 710210    |
| Meiosis specific nuclear structural 1                                                    | MNS1     | 699377    |
| Meiosis specific with OB domains                                                         | MEIOB    | 703322    |
| Meis homeobox 1                                                                          | MEIS1    | 697685    |
| Meis homeobox 2                                                                          | MEIS2    | 699748    |
| Membrane bound transcription factor peptidase, site 2                                    | MBTPS2   | 696540    |

|                                                                                                                                               |         |        |
|-----------------------------------------------------------------------------------------------------------------------------------------------|---------|--------|
| Membrane frizzled-related protein                                                                                                             | MFRP    | 704965 |
| Membrane protein, palmitoylated 1                                                                                                             | MPP1    | 702092 |
| Meningioma expressed antigen 5 (hyaluronidase)                                                                                                | MGEA5   | 712370 |
| Mesoderm development candidate 1                                                                                                              | MESDC1  | 713059 |
| Mesoderm induction early response 1, family member 2                                                                                          | MIER2   | 701450 |
| Mesoderm specific transcript                                                                                                                  | MEST    | 703327 |
| Mesothelin                                                                                                                                    | MSLN    | 698095 |
| MET proto-oncogene, receptor tyrosine kinase                                                                                                  | MET     | 704562 |
| Metadherin                                                                                                                                    | MTDH    | 702410 |
| Metal response element binding transcription factor 2                                                                                         | MTF2    | 707104 |
| Metallo-beta-lactamase domain containing 2                                                                                                    | MBLAC2  | 695437 |
| Metallophosphoesterase domain containing 2                                                                                                    | MPPED2  | 696968 |
| Metallothionein 1X                                                                                                                            | MT1X    | 709905 |
| Metastasis associated 1 family member 2                                                                                                       | MTA2    | 718772 |
| Metastasis associated 1 family member 3                                                                                                       | MTA3    | 712967 |
| Methionine sulfoxide reductase A                                                                                                              | MSRA    | 698628 |
| Methionine sulfoxide reductase B1                                                                                                             | MSRB1   | 693358 |
| Methionyl aminopeptidase 1                                                                                                                    | METAP1  | 710537 |
| Methionyl aminopeptidase 2                                                                                                                    | METAP2  | 712400 |
| Methionyl-trna synthetase                                                                                                                     | MARS    | 714744 |
| Methyl-cpg binding domain 4 DNA glycosylase                                                                                                   | MBD4    | 720557 |
| Methyl-cpg binding domain protein 5                                                                                                           | MBD5    | 721892 |
| Methylcrotonoyl-coa carboxylase 1                                                                                                             | MCCC1   | 708258 |
| Methylenetetrahydrofolate dehydrogenase (NADP+ dependent) 1,<br>methenyltetrahydrofolate cyclohydrolase, formyltetrahydrofolate<br>synthetase | MTHFD1  | 707059 |
| Methylmalonic aciduria (cobalamin deficiency) cblb type                                                                                       | MMAB    | 708973 |
| Methylmalonic aciduria (cobalamin deficiency) cbld type, with<br>homocystinuria                                                               | MMADHC  | 693783 |
| Methylmalonyl coa epimerase                                                                                                                   | MCEE    | 704094 |
| Methyltransferase like 1                                                                                                                      | METTL1  | 715796 |
| Methyltransferase like 13                                                                                                                     | METTL13 | 704943 |
| Methyltransferase like 17                                                                                                                     | METTL17 | 705009 |
| Methyltransferase like 18                                                                                                                     | METTL18 | 701890 |
| Methyltransferase like 22                                                                                                                     | METTL22 | 708739 |
| Methyltransferase like 4                                                                                                                      | METTL4  | 696353 |
| Methyltransferase like 5                                                                                                                      | METTL5  | 707119 |
| Methyltransferase like 6                                                                                                                      | METTL6  | 694202 |
| Mevalonate kinase                                                                                                                             | MVK     | 707645 |
| Mex-3 RNA binding family member B                                                                                                             | MEX3B   | 713441 |
| Microfibrillar associated protein 1                                                                                                           | MFAP1   | 711111 |
| Microfibrillar associated protein 2                                                                                                           | MFAP2   | 710885 |
| Microfibrillar associated protein 3                                                                                                           | MFAP3   | 713265 |
| Microfibrillar associated protein 5                                                                                                           | MFAP5   | 716459 |
| Microsomal glutathione S-transferase 2                                                                                                        | MGST2   | 697983 |
| Microtubule associated monooxygenase, calponin and LIM<br>domain containing 1                                                                 | MICAL1  | 698737 |
| Microtubule associated protein 1B                                                                                                             | MAP1B   | 574272 |

|                                                                   |         |           |
|-------------------------------------------------------------------|---------|-----------|
| Microtubule associated protein 1S                                 | MAP1S   | 719196    |
| Microtubule associated protein 4                                  | MAP4    | 100423616 |
| Microtubule associated protein RP/EB family member 1              | MAPRE1  | 711404    |
| Microtubule associated protein RP/EB family member 2              | MAPRE2  | 707996    |
| Microtubule associated serine/threonine kinase like               | MASTL   | 708134    |
| MID1 interacting protein 1                                        | MID1IP1 | 698138    |
| Midline 1                                                         | MID1    | 709683    |
| Midline 2                                                         | MID2    | 703281    |
| MIF4G domain containing                                           | MIF4GD  | 706005    |
| Minichromosome maintenance complex component 3                    | MCM3    | 708320    |
| Minichromosome maintenance complex component 3 associated protein | MCM3AP  | 721810    |
| Minichromosome maintenance complex component 5                    | MCM5    | 717548    |
| Missing oocyte, meiosis regulator, homolog (Drosophila)           | MIOS    | 696371    |
| Mitochondrial assembly of ribosomal large subunit 1               | MALSU1  | 704884    |
| Mitochondrial carrier 1                                           | MTCH1   | 719313    |
| Mitochondrial E3 ubiquitin protein ligase 1                       | MUL1    | 705429    |
| Mitochondrial elongation factor 2                                 | MIEF2   | 700705    |
| Mitochondrial fission regulator 1                                 | MTFR1   | 711143    |
| Mitochondrial fission regulator 1-like                            | MTFR1L  | 713213    |
| Mitochondrial genome maintenance exonuclease 1                    | MGME1   | 696467    |
| Mitochondrial intermediate peptidase                              | MIPEP   | 707131    |
| Mitochondrial poly(A) polymerase                                  | MTPAP   | 694491    |
| Mitochondrial pyruvate carrier 1                                  | MPC1    | 716864    |
| Mitochondrial ribosomal protein L10                               | MRPL10  | 695136    |
| Mitochondrial ribosomal protein L11                               | MRPL11  | 714094    |
| Mitochondrial ribosomal protein L12                               | MRPL12  | 714438    |
| Mitochondrial ribosomal protein L13                               | MRPL13  | 702994    |
| Mitochondrial ribosomal protein L16                               | MRPL16  | 698831    |
| Mitochondrial ribosomal protein L19                               | MRPL19  | 711081    |
| Mitochondrial ribosomal protein L20                               | MRPL20  | 701533    |
| Mitochondrial ribosomal protein L22                               | MRPL22  | 714920    |
| Mitochondrial ribosomal protein L23                               | MRPL23  | 704210    |
| Mitochondrial ribosomal protein L24                               | MRPL24  | 718640    |
| Mitochondrial ribosomal protein L33                               | MRPL33  | 702783    |
| Mitochondrial ribosomal protein L37                               | MRPL37  | 715168    |
| Mitochondrial ribosomal protein L39                               | MRPL39  | 708631    |
| Mitochondrial ribosomal protein L41                               | MRPL41  | 702768    |
| Mitochondrial ribosomal protein L42                               | MRPL42  | 715676    |
| Mitochondrial ribosomal protein L46                               | MRPL46  | 697872    |
| Mitochondrial ribosomal protein L50                               | MRPL50  | 713923    |
| Mitochondrial ribosomal protein L51                               | MRPL51  | 713036    |
| Mitochondrial ribosomal protein L53                               | MRPL53  | 709302    |
| Mitochondrial ribosomal protein L55                               | MRPL55  | 695962    |
| Mitochondrial ribosomal protein S11                               | MRPS11  | 697743    |
| Mitochondrial ribosomal protein S17                               | MRPS17  | 703678    |
| Mitochondrial ribosomal protein S18A                              | MRPS18A | 701465    |
| Mitochondrial ribosomal protein S21                               | MRPS21  | 706805    |

|                                                             |           |           |
|-------------------------------------------------------------|-----------|-----------|
| Mitochondrial ribosomal protein S22                         | MRPS22    | 715845    |
| Mitochondrial ribosomal protein S24                         | MRPS24    | 700722    |
| Mitochondrial ribosomal protein S30                         | MRPS30    | 701699    |
| Mitochondrial ribosomal protein S33                         | MRPS33    | 693681    |
| Mitochondrial ribosomal protein S6                          | MRPS6     | 106997264 |
| Mitochondrial transcription termination factor 1            | MTERF1    | 703725    |
| Mitochondrial transcription termination factor 2            | MTERF2    | 703925    |
| Mitochondrial transcription termination factor 3            | MTERF3    | 701366    |
| Mitochondrial translational initiation factor 2             | MTIF2     | 717042    |
| Mitochondrial trna translation optimization 1               | MTO1      | 717688    |
| Mitogen-activated protein kinase 1                          | MAPK1     | 698569    |
| Mitogen-activated protein kinase 10                         | MAPK10    | 699736    |
| Mitogen-activated protein kinase 12                         | MAPK12    | 715745    |
| Mitogen-activated protein kinase 7                          | MAPK7     | 702837    |
| Mitogen-activated protein kinase 8                          | MAPK8     | 711115    |
| Mitogen-activated protein kinase 8 interacting protein 1    | MAPK8IP1  | 714950    |
| Mitogen-activated protein kinase associated protein 1       | MAPKAP1   | 702599    |
| Mitogen-activated protein kinase kinase 1                   | MAP2K1    | 710415    |
| Mitogen-activated protein kinase kinase 2                   | MAP2K2    | 721821    |
| Mitogen-activated protein kinase kinase 4                   | MAP2K4    | 718155    |
| Mitogen-activated protein kinase kinase 5                   | MAP2K5    | 711672    |
| Mitogen-activated protein kinase kinase kinase 13           | MAP3K13   | 701085    |
| Mitogen-activated protein kinase kinase kinase 14           | MAP3K14   | 716258    |
| Mitogen-activated protein kinase kinase kinase 3            | MAP3K3    | 717866    |
| Mitogen-activated protein kinase kinase kinase 4            | MAP3K4    | 710360    |
| Mitogen-activated protein kinase kinase kinase 6            | MAP3K6    | 715911    |
| Mitogen-activated protein kinase kinase kinase kinase 1     | MAP4K1    | 694259    |
| Mitogen-activated protein kinase kinase kinase kinase 4     | MAP4K4    | 716595    |
| Mitogen-activated protein kinase kinase kinase kinase 5     | MAP4K5    | 706204    |
| Mitogen-activated protein kinase-activated protein kinase 2 | MAPKAPK2  | 695044    |
| Mitogen-activated protein kinase-activated protein kinase 5 | MAPKAPK5  | 713521    |
| Mitotic spindle organizing protein 2B                       | MZT2B     | 701787    |
| Mixed lineage kinase 4                                      | KIAA1804  | 712755    |
| Mixed lineage kinase domain-like                            | MLKL      | 710316    |
| MLX, MAX dimerization protein                               | MLX       | 710570    |
| MNAT CDK-activating kinase assembly factor 1                | MNAT1     | 703905    |
| MOB family member 4, phocein                                | MOB4      | 698149    |
| Molybdenum cofactor sulfurase                               | MOCOS     | 715633    |
| MON1 homolog B, secretory trafficking associated            | MON1B     | 715104    |
| Monoamine oxidase B                                         | MAOB      | 708468    |
| Monocyte to macrophage differentiation-associated           | MMD       | 706723    |
| MORC family CW-type zinc finger 4                           | MORC4     | 701136    |
| Morf4 family associated protein 1-like 1                    | MRFAP1L1  | 710411    |
| MORN repeat containing 2                                    | MORN2     | 106992912 |
| Mortality factor 4 like 1                                   | MORF4L1   | 711357    |
| Motile sperm domain containing 2                            | MOSPD2    | 712225    |
| Motilin                                                     | MLN       | 574099    |
| M-phase phosphoprotein 10 (U3 small nucleolar               | MPHOSPH10 | 704207    |



|                                                                 |          |           |
|-----------------------------------------------------------------|----------|-----------|
| ribonucleoprotein)                                              |          |           |
| M-phase phosphoprotein 6                                        | MPHOSPH6 | 714335    |
| M-phase specific PLK1 interacting protein                       | MPLKIP   | 703092    |
| Mpv17 mitochondrial inner membrane protein                      | MPV17    | 701026    |
| MPV17 mitochondrial membrane protein-like 2                     | MPV17L2  | 719413    |
| MRS2, magnesium transporter                                     | MRS2     | 707676    |
| MRT4 homolog, ribosome maturation factor                        | MRT04    | 702926    |
| Msh homeobox 2                                                  | MSX2     | 694227    |
| MSS51 mitochondrial translational activator                     | MSS51    | 707066    |
| Mucolipin 1                                                     | MCOLN1   | 703775    |
| Mucolipin 3                                                     | MCOLN3   | 710987    |
| Multiple C2 domains, transmembrane 1                            | MCTP1    | 697733    |
| Multiple C2 domains, transmembrane 2                            | MCTP2    | 706949    |
| Multiple inositol-polyphosphate phosphatase 1                   | MINPP1   | 704362    |
| Multivesicular body subunit 12A                                 | MVB12A   | 716261    |
| Musashi RNA binding protein 2                                   | MSI2     | 100423536 |
| Muscleblind like splicing regulator 1                           | MBNL1    | 708735    |
| Mutl homolog 1                                                  | MLH1     | 698782    |
| Muty DNA glycosylase                                            | MUTYH    | 705651    |
| MYB binding protein (P160) 1a                                   | MYBBP1A  | 708817    |
| Myb/SANT-like DNA-binding domain containing 2                   | MSANTD2  | 712347    |
| Myb/SANT-like DNA-binding domain containing 4 with coiled-coils | MSANTD4  | 706055    |
| MYC associated factor X                                         | MAX      | 708228    |
| Myc target 1                                                    | MYCT1    | 711296    |
| MYCBP associated protein                                        | MYCBPAP  | 705880    |
| Myelin associated glycoprotein                                  | MAG      | 718575    |
| Myelin protein zero-like 2                                      | MPZL2    | 699330    |
| Myeloid cell leukemia 1                                         | MCL1     | 707539    |
| Myeloid cell nuclear differentiation antigen                    | MNDA     | 719220    |
| Myeloid differentiation primary response 88                     | MYD88    | 696494    |
| Myeloid leukemia factor 1                                       | MLF1     | 704116    |
| Myeloid zinc finger 1                                           | MZF1     | 712144    |
| Myeloid/lymphoid or mixed-lineage leukemia; translocated to, 11 | MLLT11   | 709190    |
| Myeloid/lymphoid or mixed-lineage leukemia; translocated to, 6  | MLLT6    | 694045    |
| Myocyte enhancer factor 2B                                      | MEF2B    | 100568440 |
| Myocyte enhancer factor 2C                                      | MEF2C    | 694992    |
| Myod family inhibitor                                           | MDFI     | 694074    |
| Myoferlin                                                       | MYOF     | 700922    |
| Myomesin 2                                                      | MYOM2    | 716555    |
| Myoneurin                                                       | MYNN     | 698094    |
| Myosin IA                                                       | MYO1A    | 714033    |
| Myosin IF                                                       | MYO1F    | 712101    |
| Myosin light chain 4                                            | MYL4     | 717354    |
| Myosin, light chain 12A, regulatory, non-sarcomeric             | MYL12A   | 695077    |
| Myostatin                                                       | MSTN     | 710114    |
| Myotrophin                                                      | MTPN     | 708941    |
| Myotubularin 1                                                  | MTM1     | 703131    |

|                                                                    |         |        |
|--------------------------------------------------------------------|---------|--------|
| Myotubularin related protein 11                                    | MTMR11  | 705542 |
| Myotubularin related protein 2                                     | MTMR2   | 699703 |
| Myotubularin related protein 4                                     | MTMR4   | 714621 |
| Myotubularin related protein 6                                     | MTMR6   | 709118 |
| Myotubularin related protein 8                                     | MTMR8   | 708037 |
| Myozenin 1                                                         | MYOZ1   | 706768 |
| Myristoylated alanine-rich protein kinase C substrate              | MARCKS  | 694077 |
| MYST/Esa1-associated factor 6                                      | MEAF6   | 713666 |
| N(alpha)-acetyltransferase 15, nata auxiliary subunit              | NAA15   | 697123 |
| N(alpha)-acetyltransferase 30, natc catalytic subunit              | NAA30   | 699379 |
| N(alpha)-acetyltransferase 35, natc auxiliary subunit              | NAA35   | 710122 |
| N(alpha)-acetyltransferase 50, nate catalytic subunit              | NAA50   | 709764 |
| N(alpha)-acetyltransferase 60, natf catalytic subunit              | NAA60   | 703207 |
| NACC family member 2, BEN and BTB (POZ) domain containing          | NACC2   | 721794 |
| N-acetylglucosamine kinase                                         | NAGK    | 703976 |
| N-acetylglucosamine-1-phosphate transferase, gamma subunit         | GNPTG   | 722441 |
| N-acetylglucosamine-1-phosphodiester alpha-N-acetylglucosaminidase | NAGPA   | 707352 |
| N-acetylglutamate synthase                                         | NAGS    | 714102 |
| N-acetyltransferase 8 (GCN5-related, putative)                     | NAT8    | 706820 |
| NAD(P) dependent steroid dehydrogenase-like                        | NSDHL   | 693333 |
| NAD(P)H dehydrogenase, quinone 2                                   | NQO2    | 707675 |
| NADH:ubiquinone oxidoreductase complex assembly factor 1           | NDUFAF1 | 710275 |
| NADH:ubiquinone oxidoreductase complex assembly factor 2           | NDUFAF2 | 693441 |
| NADH:ubiquinone oxidoreductase complex assembly factor 4           | NDUFAF4 | 705102 |
| NADH:ubiquinone oxidoreductase complex assembly factor 6           | NDUFAF6 | 700515 |
| NADH:ubiquinone oxidoreductase complex assembly factor 7           | NDUFAF7 | 709473 |
| NADH:ubiquinone oxidoreductase core subunit S2                     | NDUFS2  | 719935 |
| NADH:ubiquinone oxidoreductase core subunit S3                     | NDUFS3  | 713040 |
| NADH:ubiquinone oxidoreductase core subunit S8                     | NDUFS8  | 710845 |
| NADH:ubiquinone oxidoreductase subunit A1                          | NDUFA1  | 694635 |
| NADH:ubiquinone oxidoreductase subunit A12                         | NDUFA12 | 711970 |
| NADH:ubiquinone oxidoreductase subunit A8                          | NDUFA8  | 698706 |
| NADH:ubiquinone oxidoreductase subunit AB1                         | NDUFAB1 | 700718 |
| NADH:ubiquinone oxidoreductase subunit B10                         | NDUFB10 | 693482 |
| NADH:ubiquinone oxidoreductase subunit B2                          | NDUFB2  | 693431 |
| NADH:ubiquinone oxidoreductase subunit B4                          | NDUFB4  | 713428 |
| NADH:ubiquinone oxidoreductase subunit B8                          | NDUFB8  | 710521 |
| NADH:ubiquinone oxidoreductase subunit B9                          | NDUFB9  | 711387 |
| NADH:ubiquinone oxidoreductase subunit C1                          | NDUFC1  | 697242 |
| NADH:ubiquinone oxidoreductase subunit S4                          | NDUFS4  | 704137 |
| Naked cuticle homolog 1 (Drosophila)                               | NKD1    | 698036 |
| Nascent polypeptide-associated complex alpha subunit               | NACA    | 713416 |
| Natriuretic peptide C                                              | NPPC    | 717026 |
| Natriuretic peptide receptor 2                                     | NPR2    | 695750 |
| Natural killer cell granule protein 7                              | NKG7    | 719624 |
| NCK adaptor protein 2                                              | NCK2    | 713287 |

|                                                                      |         |           |
|----------------------------------------------------------------------|---------|-----------|
| NCK interacting protein with SH3 domain                              | NCKIPSD | 709410    |
| NCK-associated protein 1                                             | NCKAP1  | 711124    |
| NECAP endocytosis associated 2                                       | NECAP2  | 698687    |
| NEDD8 activating enzyme E1 subunit 1                                 | NAE1    | 696429    |
| Negative elongation factor complex member C/D                        | NELFCD  | 696053    |
| Negative elongation factor complex member E                          | NELFE   | 716913    |
| Negative regulator of ubiquitin-like proteins 1                      | NUB1    | 715231    |
| Nerve growth factor receptor (TNFRSF16) associated protein 1         | NGFRAP1 | 100428976 |
| N-ethylmaleimide sensitive factor                                    | NSF     | 715297    |
| Netrin G2                                                            | NTNG2   | 715127    |
| Neural precursor cell expressed, developmentally down-regulated 1    | NEDD1   | 713673    |
| Neuralized E3 ubiquitin protein ligase 2                             | NEURL2  | 708904    |
| Neuraminidase 1 (lysosomal sialidase)                                | NEU1    | 716740    |
| Neurensin 1                                                          | NRSN1   | 707362    |
| Neurexophilin and PC-esterase domain family member 3                 | NXPE3   | 702612    |
| Neurologin 2                                                         | NLGN2   | 574368    |
| Neurologin 3                                                         | NLGN3   | 574216    |
| Neurologin 4, Y-linked                                               | NLGN4Y  | 100270696 |
| Neuromedin U                                                         | NMU     | 697171    |
| Neuron navigator 2                                                   | NAV2    | 702146    |
| Neuronal cell adhesion molecule                                      | NRCAM   | 574228    |
| Neuronal pentraxin I                                                 | NPTX1   | 718259    |
| Neuronal regeneration related protein                                | NREP    | 712463    |
| Neuronal tyrosine-phosphorylated phosphoinositide-3-kinase adaptor 1 | NYAP1   | 719205    |
| Neuron-derived neurotrophic factor                                   | NDNF    | 706304    |
| Neuropeptide FF-amide peptide precursor                              | NPFF    | 703412    |
| Neuropeptide VF precursor                                            | NPVF    | 613271    |
| Neuropeptide Y receptor Y1                                           | NPY1R   | 574206    |
| Neuropilin 1                                                         | NRP1    | 697755    |
| Neuroplastin                                                         | NPTN    | 699627    |
| Neurotrophic tyrosine kinase, receptor, type 3                       | NTRK3   | 697615    |
| NFS1 cysteine desulfurase                                            | NFS1    | 704077    |
| NGFI-A binding protein 1                                             | NAB1    | 693274    |
| NGFI-A binding protein 2 (EGR1 binding protein 2)                    | NAB2    | 714209    |
| N-glycanase 1                                                        | NGLY1   | 700842    |
| NHL repeat containing 2                                              | NHLRC2  | 698009    |
| NHP2 ribonucleoprotein                                               | NHP2    | 701950    |
| Nicastrin                                                            | NCSTN   | 719696    |
| Nicotinamide N-methyltransferase                                     | NNMT    | 695185    |
| Nicotinamide nucleotide transhydrogenase                             | NNT     | 701110    |
| Niemann-Pick disease, type C2                                        | NPC2    | 699881    |
| NIMA-related kinase 1                                                | NEK1    | 694345    |
| NIMA-related kinase 2                                                | NEK2    | 711473    |
| NIMA-related kinase 3                                                | NEK3    | 710127    |
| NIMA-related kinase 7                                                | NEK7    | 710464    |
| NIN1/RPN12 binding protein 1 homolog                                 | NOB1    | 705344    |

|                                                                                     |         |           |
|-------------------------------------------------------------------------------------|---------|-----------|
| Ninein                                                                              | NIN     | 709532    |
| Ninjurin 1                                                                          | NINJ1   | 717218    |
| Nitric oxide associated 1                                                           | NOA1    | 693437    |
| Nitric oxide synthase trafficking                                                   | NOSTRIN | 705063    |
| NMD3 ribosome export adaptor                                                        | NMD3    | 701677    |
| NME/NM23 nucleoside diphosphate kinase 2                                            | NME2    | 100533960 |
| N-methylpurine DNA glycosylase                                                      | MPG     | 722257    |
| Nmra-like family domain containing 1                                                | NMRAL1  | 705343    |
| N-myc and STAT interactor                                                           | NMI     | 694554    |
| Noggin                                                                              | NOG     | 707338    |
| Non imprinted in Prader-Willi/Angelman syndrome 2                                   | NIPA2   | 710147    |
| Non-POU domain containing, octamer-binding                                          | NONO    | 697263    |
| Non-SMC condensin II complex subunit D3                                             | NCAPD3  | 700276    |
| Non-SMC condensin II complex subunit H2                                             | NCAPH2  | 716120    |
| NOP16 nucleolar protein                                                             | NOP16   | 696768    |
| NOP2 nucleolar protein                                                              | NOP2    | 713097    |
| NOP2/Sun RNA methyltransferase family member 5                                      | NSUN5   | 716219    |
| NOP58 ribonucleoprotein                                                             | NOP58   | 703859    |
| NOP9 nucleolar protein                                                              | NOP9    | 715969    |
| Norrie disease (pseudoglioma)                                                       | NDP     | 702203    |
| NPL4 homolog, ubiquitin recognition factor                                          | NPLOC4  | 713927    |
| NPR2-like, GATOR1 complex subunit                                                   | NPRL2   | 701924    |
| NRDE-2, necessary for RNA interference, domain containing                           | NRDE2   | 695676    |
| NSA2, ribosome biogenesis homolog                                                   | NSA2    | 704670    |
| NSE4 homolog A, SMC5-SMC6 complex component                                         | NSMCE4A | 705375    |
| NSF attachment protein alpha                                                        | NAPA    | 717355    |
| NSFL1 (p97) cofactor (p47)                                                          | NSFL1C  | 715743    |
| N-terminal asparagine amidase                                                       | NTAN1   | 100427568 |
| N-terminal EF-hand calcium binding protein 1                                        | NECAB1  | 696533    |
| N-terminal Xaa-Pro-Lys N-methyltransferase 1                                        | NTMT1   | 716763    |
| Nth-like DNA glycosylase 1                                                          | NTHL1   | 694848    |
| Nuclear assembly factor 1 ribonucleoprotein                                         | NAF1    | 702745    |
| Nuclear casein kinase and cyclin-dependent kinase substrate 1                       | NUCKS1  | 697298    |
| Nuclear envelope integral membrane protein 1                                        | NEMP1   | 710700    |
| Nuclear factor I/A                                                                  | NFIA    | 694022    |
| Nuclear factor of kappa light polypeptide gene enhancer in B-cells 1                | NFKB1   | 710324    |
| Nuclear factor of kappa light polypeptide gene enhancer in B-cells inhibitor, alpha | NFKBIA  | 695335    |
| Nuclear factor of kappa light polypeptide gene enhancer in B-cells inhibitor, delta | NFKBID  | 711338    |
| Nuclear factor, erythroid 2                                                         | NFE2    | 705061    |
| Nuclear factor, erythroid 2 like 1                                                  | NFE2L1  | 695404    |
| Nuclear factor, erythroid 2 like 2                                                  | NFE2L2  | 707606    |
| Nuclear factor, interleukin 3 regulated                                             | NFIL3   | 704757    |
| Nuclear fragile X mental retardation protein interacting protein 2                  | NUFIP2  | 711330    |
| Nuclear prelamin A recognition factor                                               | NARF    | 716259    |
| Nuclear receptor binding SET domain protein 1                                       | NSD1    | 706131    |

|                                                            |         |           |
|------------------------------------------------------------|---------|-----------|
| Nuclear receptor coactivator 4                             | NCOA4   | 709509    |
| Nuclear receptor coactivator 5                             | NCOA5   | 717054    |
| Nuclear receptor coactivator 6                             | NCOA6   | 706903    |
| Nuclear receptor subfamily 1 group H member 3              | NR1H3   | 713679    |
| Nuclear receptor subfamily 1 group I member 2              | NR1I2   | 574226    |
| Nuclear receptor subfamily 2 group F member 2              | NR2F2   | 707483    |
| Nuclear RNA export factor 1                                | NXF1    | 718420    |
| Nuclear RNA export factor 3                                | NXF3    | 695351    |
| Nuclear transcription factor Y subunit gamma               | NFYC    | 696290    |
| Nuclear transport factor 2-like export factor 1            | NXT1    | 711846    |
| Nuclear transport factor 2-like export factor 2            | NXT2    | 704593    |
| Nuclear VCP-like                                           | NVL     | 702010    |
| Nucleic acid binding protein 1                             | NABP1   | 694172    |
| Nucleobindin 2                                             | NUCB2   | 697084    |
| Nucleolar protein 10                                       | NOL10   | 695849    |
| Nucleolar protein 8                                        | NOL8    | 705799    |
| Nucleolar protein interacting with the FHA domain of MKI67 | NIFK    | 697198    |
| Nucleolin                                                  | NCL     | 720965    |
| Nucleophosmin/nucleoplasmin 3                              | NPM3    | 712300    |
| Nucleoporin 107kda                                         | NUP107  | 718214    |
| Nucleoporin 153kda                                         | NUP153  | 703888    |
| Nucleoporin 205kda                                         | NUP205  | 708216    |
| Nucleoporin 210kda                                         | NUP210  | 693669    |
| Nucleoporin 35kda                                          | NUP35   | 706497    |
| Nucleoporin 37kda                                          | NUP37   | 697933    |
| Nucleoporin 50kda                                          | NUP50   | 713282    |
| Nucleoporin 85kda                                          | NUP85   | 705628    |
| Nucleoporin 88kda                                          | NUP88   | 711734    |
| Nucleosome assembly protein 1-like 5                       | NAP1L5  | 703223    |
| Nucleotide binding oligomerization domain containing 1     | NOD1    | 695655    |
| Nucleotide binding oligomerization domain containing 2     | NOD2    | 695542    |
| Nude neurodevelopment protein 1                            | NDE1    | 717754    |
| Nudix hydrolase 1                                          | NUDT1   | 713078    |
| Nudix hydrolase 13                                         | NUDT13  | 707796    |
| Nudix hydrolase 22                                         | NUDT22  | 717864    |
| Nudix hydrolase 5                                          | NUDT5   | 694368    |
| NUF2, NDC80 kinetochore complex component                  | NUF2    | 693637    |
| O-6-methylguanine-DNA methyltransferase                    | MGMT    | 698134    |
| O-acyl-ADP-ribose deacylase 1                              | OARD1   | 719685    |
| OCIA domain containing 1                                   | OCIAD1  | 706191    |
| OCIA domain containing 2                                   | OCIAD2  | 706300    |
| Oculocerebrorenal syndrome of Lowe                         | OCRL    | 702345    |
| Odd-skipped related transcription factor 1                 | OSR1    | 106992848 |
| Odd-skipped related transcription factor 2                 | OSR2    | 704253    |
| Olfactomedin 1                                             | OLFM1   | 712348    |
| Olfactomedin 2                                             | OLFM2   | 711336    |
| Olfactomedin like 2B                                       | OLFML2B | 720062    |
| Olfactomedin like 3                                        | OLFML3  | 707969    |

|                                                                           |         |           |
|---------------------------------------------------------------------------|---------|-----------|
| Olfactory marker protein                                                  | OMP     | 698210    |
| Olfactory receptor, family 2, subfamily AG, member 2                      | OR2AG2  | 709556    |
| Olfactory receptor, family 2, subfamily W, member 1                       | OR2W1   | 708515    |
| Olfactory receptor, family 4, subfamily K, member 13                      | OR4K13  | 700920    |
| Oligonucleotide/oligosaccharide-binding fold containing 1                 | OBFC1   | 714968    |
| Opa interacting protein 5                                                 | OIP5    | 705837    |
| Opsin 3                                                                   | OPN3    | 707436    |
| Optic atrophy 3 (autosomal recessive, with chorea and spastic paraplegia) | OPA3    | 714806    |
| ORAI calcium release-activated calcium modulator 1                        | ORAI1   | 700190    |
| Oral-facial-digital syndrome 1                                            | OFD1    | 711677    |
| Origin recognition complex subunit 1                                      | ORC1    | 713271    |
| Origin recognition complex subunit 3                                      | ORC3    | 700773    |
| Origin recognition complex subunit 5                                      | ORC5    | 696683    |
| Origin recognition complex subunit 6                                      | ORC6    | 716175    |
| ORMDL sphingolipid biosynthesis regulator 1                               | ORMDL1  | 709832    |
| ORMDL sphingolipid biosynthesis regulator 2                               | ORMDL2  | 710296    |
| ORMDL sphingolipid biosynthesis regulator 3                               | ORMDL3  | 699154    |
| Ornithine aminotransferase                                                | OAT     | 693970    |
| Ornithine decarboxylase 1                                                 | ODC1    | 695625    |
| Ornithine decarboxylase antizyme 1                                        | OAZ1    | 721477    |
| O-sialoglycoprotein endopeptidase                                         | OSGEP   | 702512    |
| Osteosarcoma amplified 9, endoplasmic reticulum lectin                    | OS9     | 715555    |
| Otopetrin 1                                                               | OTOP1   | 712780    |
| OTU deubiquitinase with linear linkage specificity                        | OTULIN  | 698991    |
| OTU domain containing 6B                                                  | OTUD6B  | 697015    |
| Outer dense fiber of sperm tails 1                                        | ODF1    | 707269    |
| Outer dense fiber of sperm tails 2                                        | ODF2    | 717505    |
| Oxidative stress induced growth inhibitor family member 2                 | OSGIN2  | 695376    |
| Oxoeicosanoid (OXE) receptor 1                                            | OXER1   | 713039    |
| Oxysterol binding protein                                                 | OSBP    | 699325    |
| Oxysterol binding protein like 10                                         | OSBPL10 | 703555    |
| Oxysterol binding protein like 11                                         | OSBPL11 | 716096    |
| Oxysterol binding protein like 8                                          | OSBPL8  | 693338    |
| P450 (cytochrome) oxidoreductase                                          | POR     | 715888    |
| P53 and DNA damage regulated 1                                            | PDRG1   | 712622    |
| PAN2 poly(A) specific ribonuclease subunit                                | PAN2    | 712478    |
| Pancreatic polypeptide                                                    | PPY     | 713988    |
| Pantothenate kinase 1                                                     | PANK1   | 696041    |
| Pantothenate kinase 2                                                     | PANK2   | 717639    |
| Pantothenate kinase 4                                                     | PANK4   | 694804    |
| PAP associated domain containing 7                                        | PAPD7   | 713853    |
| Papillary renal cell carcinoma (translocation-associated)                 | PRCC    | 718660    |
| Par-3 family cell polarity regulator                                      | PARD3   | 706472    |
| Paralemmin 2                                                              | PALM2   | 100532752 |
| Paraneoplastic Ma antigen 3                                               | PNMA3   | 694406    |
| Paraoxonase 2                                                             | PON2    | 699107    |
| Paraspeckle component 1                                                   | PSPC1   | 705080    |

|                                                            |          |           |
|------------------------------------------------------------|----------|-----------|
| Parathyroid hormone 1 receptor                             | PTH1R    | 712147    |
| Parkinson protein 7                                        | PARK7    | 708377    |
| Partner and localizer of BRCA2                             | PALB2    | 700843    |
| Paternally expressed 3                                     | PEG3     | 707825    |
| PAX3 and PAX7 binding protein 1                            | PAXBP1   | 700489    |
| PAXIP1 associated glutamate-rich protein 1                 | PAGR1    | 706839    |
| PC-esterase domain containing 1A                           | PCED1A   | 716956    |
| PCI domain containing 2                                    | PCID2    | 714247    |
| PDLIM1 interacting kinase 1 like                           | PDIK1L   | 719774    |
| PDZ domain containing 4                                    | PDZD4    | 697387    |
| PDZ domain containing ring finger 3                        | PDZRN3   | 709901    |
| PDZK1 interacting protein 1                                | PDZK1IP1 | 709916    |
| Pellino E3 ubiquitin protein ligase 1                      | PELI1    | 696416    |
| Peptidase (mitochondrial processing) alpha                 | PMPCA    | 721742    |
| Peptide deformylase (mitochondrial)                        | PDF      | 100427224 |
| Peptidoglycan recognition protein 1                        | PGLYRP1  | 718480    |
| Peptidoglycan recognition protein 3                        | PGLYRP3  | 714583    |
| Peptidyl arginine deiminase, type II                       | PADI2    | 711044    |
| Peptidylprolyl isomerase domain and WD repeat containing 1 | PPWD1    | 696267    |
| Peptidylprolyl isomerase E (cyclophilin E)                 | PPIE     | 716340    |
| Peptidylprolyl isomerase G (cyclophilin G)                 | PIIG     | 706262    |
| Peptidylprolyl isomerase H (cyclophilin H)                 | PPIH     | 697669    |
| Peptidylprolyl isomerase like 3                            | PPIL3    | 700456    |
| Periaxin                                                   | PRX      | 702329    |
| Period circadian clock 1                                   | PER1     | 721948    |
| Periostin, osteoblast specific factor                      | POSTN    | 695528    |
| Peripheral myelin protein 22                               | PMP22    | 693527    |
| Peroxiredoxin 2                                            | PRDX2    | 716665    |
| Peroxiredoxin 3                                            | PRDX3    | 702882    |
| Peroxiredoxin 4                                            | PRDX4    | 697635    |
| Peroxiredoxin 6                                            | PRDX6    | 706486    |
| Peroxisomal biogenesis factor 11 alpha                     | PEX11A   | 700511    |
| Peroxisomal biogenesis factor 11 beta                      | PEX11B   | 698184    |
| Peroxisomal biogenesis factor 11 gamma                     | PEX11G   | 703198    |
| Peroxisomal biogenesis factor 16                           | PEX16    | 714904    |
| Peroxisomal biogenesis factor 3                            | PEX3     | 700730    |
| Peroxisomal biogenesis factor 6                            | PEX6     | 697597    |
| Peroxisomal membrane protein 2                             | PXMP2    | 693648    |
| Peroxisome proliferator-activated receptor delta           | PPARD    | 718861    |
| PH domain and leucine rich repeat protein phosphatase 1    | PHLPP1   | 705882    |
| PHD finger protein 1                                       | PHF1     | 718337    |
| PHD finger protein 19                                      | PHF19    | 704050    |
| PHD finger protein 2                                       | PHF2     | 717585    |
| PHD finger protein 21A                                     | PHF21A   | 714798    |
| PHD finger protein 23                                      | PHF23    | 714538    |
| PHD finger protein 6                                       | PHF6     | 707390    |
| PHD finger protein 7                                       | PHF7     | 697103    |
| Phenylalanyl-trna synthetase 2, mitochondrial              | FARS2    | 710945    |

|                                                                       |          |           |
|-----------------------------------------------------------------------|----------|-----------|
| Phenylethanolamine N-methyltransferase                                | PNMT     | 697444    |
| Phosphatase, orphan 1                                                 | PHOSPHO1 | 698959    |
| Phosphatase, orphan 2                                                 | PHOSPHO2 | 100429656 |
| Phosphate cytidylyltransferase 1, choline, alpha                      | PCYT1A   | 722105    |
| Phosphate regulating endopeptidase homolog, X-linked                  | PHEX     | 697025    |
| Phosphatidylethanolamine N-methyltransferase                          | PEMT     | 699083    |
| Phosphatidylglycerophosphate synthase 1                               | PGS1     | 710125    |
| Phosphatidylinositol 3-kinase catalytic subunit type 3                | PIK3C3   | 693918    |
| Phosphatidylinositol 4-kinase, catalytic, alpha                       | PI4KA    | 698020    |
| Phosphatidylinositol 4-kinase, catalytic, beta                        | PI4KB    | 710104    |
| Phosphatidylinositol glycan anchor biosynthesis class A               | PIGA     | 712514    |
| Phosphatidylinositol glycan anchor biosynthesis class C               | PIGC     | 705657    |
| Phosphatidylinositol glycan anchor biosynthesis class F               | PIGF     | 714844    |
| Phosphatidylinositol glycan anchor biosynthesis class G               | PIGG     | 714088    |
| Phosphatidylinositol glycan anchor biosynthesis class H               | PIGH     | 710780    |
| Phosphatidylinositol glycan anchor biosynthesis class M               | PIGM     | 719582    |
| Phosphatidylinositol glycan anchor biosynthesis class O               | PIGO     | 698588    |
| Phosphatidylinositol glycan anchor biosynthesis class S               | PIGS     | 709115    |
| Phosphatidylinositol transfer protein beta                            | PITPNB   | 713414    |
| Phosphatidylinositol-4,5-bisphosphate 3-kinase catalytic subunit beta | PIK3CB   | 716098    |
| Phosphodiesterase 12                                                  | PDE12    | 703552    |
| Phosphodiesterase 4B                                                  | PDE4B    | 699309    |
| Phosphodiesterase 5A                                                  | PDE5A    | 705592    |
| Phosphodiesterase 8A                                                  | PDE8A    | 694750    |
| Phosphodiesterase 9A                                                  | PDE9A    | 100301992 |
| Phosphoglycerate kinase 1                                             | PGK1     | 706325    |
| Phosphohistidine phosphatase 1                                        | PHPT1    | 721674    |
| Phosphoinositide-3-kinase interacting protein 1                       | PIK3IP1  | 716694    |
| Phosphoinositide-3-kinase regulatory subunit 4                        | PIK3R4   | 718012    |
| Phospholipase A2 group VI                                             | PLA2G6   | 700184    |
| Phospholipase A2 group XIIB                                           | PLA2G12B | 708031    |
| Phospholipase A2 group XV                                             | PLA2G15  | 702619    |
| Phospholipase A2 group XVI                                            | PLA2G16  | 722178    |
| Phospholipase A2, group IVB (cytosolic)                               | PLA2G4B  | 100533112 |
| Phospholipase B domain containing 1                                   | PLBD1    | 698939    |
| Phospholipase B domain containing 2                                   | PLBD2    | 714669    |
| Phospholipase C beta 1                                                | PLCB1    | 718387    |
| Phospholipase C delta 1                                               | PLCD1    | 696860    |
| Phospholipase C eta 1                                                 | PLCH1    | 707243    |
| Phospholipase D family member 3                                       | PLD3     | 701083    |
| Phospholipid phosphatase 1                                            | PLPP1    | 706539    |
| Phospholipid phosphatase 2                                            | PLPP2    | 721004    |
| Phospholipid phosphatase 6                                            | PLPP6    | 695188    |
| Phospholipid phosphatase 7 (inactive)                                 | PLPP7    | 722411    |
| Phospholipid scramblase 1                                             | PLSCR1   | 713232    |
| Phospholipid scramblase 3                                             | PLSCR3   | 721831    |
| Phosphopantothenoylcysteine decarboxylase                             | PPCDC    | 704015    |



|                                                                                                                                   |         |           |
|-----------------------------------------------------------------------------------------------------------------------------------|---------|-----------|
| Phosphopantothenoylcysteine synthetase                                                                                            | PPCS    | 697064    |
| Phosphoribosyl pyrophosphate synthetase 1                                                                                         | PRPS1   | 702529    |
| Phosphoribosyl pyrophosphate synthetase-associated protein 1                                                                      | PRPSAP1 | 706625    |
| Phosphoribosyl transferase domain containing 1                                                                                    | PRTFDC1 | 712819    |
| Phosphoribosylglycinamide formyltransferase, phosphoribosyl<br>glycinamide synthetase, phosphoribosylaminoimidazole<br>synthetase | GART    | 704926    |
| Phosphorylase kinase, alpha 2 (liver)                                                                                             | PHKA2   | 694376    |
| Phosphorylase, glycogen, liver                                                                                                    | PYGL    | 706853    |
| Phytanoyl-coa dioxygenase domain containing 1                                                                                     | PHYHD1  | 717104    |
| Piggybac transposable element derived 2                                                                                           | PGBD2   | 709925    |
| PIH1 domain containing 1                                                                                                          | PIH1D1  | 718787    |
| PIH1 domain containing 2                                                                                                          | PIH1D2  | 711087    |
| PILR alpha associated neural protein                                                                                              | PIANP   | 713548    |
| Pirin                                                                                                                             | PIR     | 720959    |
| Pituitary tumor-transforming 1                                                                                                    | PTTG1   | 696143    |
| Placenta specific 9                                                                                                               | PLAC9   | 700881    |
| Plakophilin 2                                                                                                                     | PKP2    | 100429376 |
| Plasminogen activator, tissue                                                                                                     | PLAT    | 704475    |
| Plasminogen receptor, C-terminal lysine transmembrane protein                                                                     | PLGRKT  | 693286    |
| Plastin 3                                                                                                                         | PLS3    | 709055    |
| Platelet derived growth factor C                                                                                                  | PDGFC   | 700236    |
| Platelet derived growth factor D                                                                                                  | PDGFD   | 704310    |
| Platelet-derived growth factor beta polypeptide                                                                                   | PDGFB   | 703173    |
| Pleckstrin and Sec7 domain containing                                                                                             | PSD     | 714737    |
| Pleckstrin and Sec7 domain containing 2                                                                                           | PSD2    | 694873    |
| Pleckstrin homology and FYVE domain containing 1                                                                                  | PLEKHF1 | 700343    |
| Pleckstrin homology and FYVE domain containing 2                                                                                  | PLEKHF2 | 701884    |
| Pleckstrin homology and rhogef domain containing G2                                                                               | PLEKHG2 | 698408    |
| Pleckstrin homology domain containing A1                                                                                          | PLEKHA1 | 705731    |
| Pleckstrin homology domain containing A3                                                                                          | PLEKHA3 | 703417    |
| Pleckstrin homology domain containing A7                                                                                          | PLEKHA7 | 697646    |
| Pleckstrin homology domain containing N1                                                                                          | PLEKHN1 | 697918    |
| Pleckstrin homology domain containing O1                                                                                          | PLEKHO1 | 706145    |
| Pleckstrin homology domain containing O2                                                                                          | PLEKHO2 | 712677    |
| Pleckstrin homology domain interacting protein                                                                                    | PHIP    | 716810    |
| Pleckstrin homology, myth4 and FERM domain containing H3                                                                          | PLEKHH3 | 711013    |
| Pleiotrophin                                                                                                                      | PTN     | 709496    |
| Plexin B3                                                                                                                         | PLXNB3  | 696903    |
| Plexin domain containing 2                                                                                                        | PLXDC2  | 702523    |
| PNN-interacting serine/arginine-rich protein                                                                                      | PNISR   | 694075    |
| POC1 centriolar protein A                                                                                                         | POC1A   | 698157    |
| Pogo transposable element with KRAB domain                                                                                        | POGK    | 696834    |
| Pogo transposable element with ZNF domain                                                                                         | POGZ    | 710634    |
| Poliovirus receptor-related 2 (herpesvirus entry mediator B)                                                                      | PVRL2   | 713229    |
| Polo-like kinase 1                                                                                                                | PLK1    | 697686    |
| Polo-like kinase 4                                                                                                                | PLK4    | 710233    |
| Poly(A) binding protein interacting protein 1                                                                                     | PAIP1   | 700869    |

|                                                                                                 |        |           |
|-------------------------------------------------------------------------------------------------|--------|-----------|
| Poly(A) binding protein interacting protein 2                                                   | PAIP2  | 693317    |
| Poly(A) binding protein, cytoplasmic 1                                                          | PABPC1 | 705847    |
| Poly(A) binding protein, cytoplasmic 3                                                          | PABPC3 | 708617    |
| Poly(A) polymerase gamma                                                                        | PAPOLG | 717781    |
| Poly(A)-specific ribonuclease                                                                   | PARN   | 712984    |
| Poly(ADP-ribose) glycohydrolase                                                                 | PARG   | 709432    |
| Poly(ADP-ribose) polymerase 2                                                                   | PARP2  | 701955    |
| Poly(ADP-ribose) polymerase family member 10                                                    | PARP10 | 708132    |
| Poly(ADP-ribose) polymerase family member 16                                                    | PARP16 | 709140    |
| Poly(rc) binding protein 2                                                                      | PCBP2  | 703175    |
| Poly(rc) binding protein 4                                                                      | PCBP4  | 699225    |
| Polybromo 1                                                                                     | PBRM1  | 696361    |
| Polycomb group ring finger 2                                                                    | PCGF2  | 694187    |
| Polycomb group ring finger 3                                                                    | PCGF3  | 697151    |
| Polycomb group ring finger 6                                                                    | PCGF6  | 714508    |
| Polyglutamine binding protein 1                                                                 | PQBP1  | 711678    |
| Polyhomeotic homolog 2 (Drosophila)                                                             | PHC2   | 710201    |
| Polymerase (DNA directed), beta                                                                 | POLB   | 704801    |
| Polymerase (DNA directed), gamma                                                                | POLG   | 699750    |
| Polymerase (DNA-directed), delta 4, accessory subunit                                           | POLD4  | 712632    |
| Polymerase (RNA) I polypeptide C                                                                | POLR1C | 700727    |
| Polymerase (RNA) II (DNA directed) polypeptide C, 33kda                                         | POLR2C | 704555    |
| Polymerase (RNA) II (DNA directed) polypeptide F                                                | POLR2F | 699566    |
| Polymerase (RNA) II (DNA directed) polypeptide G                                                | POLR2G | 718548    |
| Polymerase (RNA) II (DNA directed) polypeptide H                                                | POLR2H | 100429040 |
| Polymerase (RNA) II (DNA directed) polypeptide I, 14.5kda                                       | POLR2I | 712412    |
| Polymerase (RNA) III (DNA directed) polypeptide B                                               | POLR3B | 702711    |
| Polymerase (RNA) III (DNA directed) polypeptide C (62kd)                                        | POLR3C | 696943    |
| Polymerase (RNA) mitochondrial (DNA directed)                                                   | POLRMT | 100426184 |
| Polynucleotide kinase 3'-phosphatase                                                            | PNKP   | 719084    |
| Polypeptide N-acetylgalactosaminyltransferase 1                                                 | GALNT1 | 708930    |
| Polypyrimidine tract binding protein 2                                                          | PTBP2  | 710101    |
| Polysaccharide biosynthesis domain containing 1                                                 | PBDC1  | 705125    |
| POP5 homolog, ribonuclease P/MRP subunit                                                        | POP5   | 697559    |
| Post-GPI attachment to proteins 2                                                               | PGAP2  | 718085    |
| Post-GPI attachment to proteins 3                                                               | PGAP3  | 697699    |
| Potassium channel modulatory factor 1                                                           | KCMF1  | 694645    |
| Potassium channel subfamily M regulatory beta subunit 4                                         | KCNMB4 | 717360    |
| Potassium channel tetramerization domain containing 2                                           | KCTD2  | 700474    |
| Potassium channel tetramerization domain containing 6                                           | KCTD6  | 701810    |
| Potassium channel tetramerization domain containing 9                                           | KCTD9  | 711515    |
| Potassium channel, calcium activated intermediate/small conductance subfamily N alpha, member 1 | KCNN1  | 720091    |
| Potassium channel, inwardly rectifying subfamily J, member 12                                   | KCNJ12 | 705326    |
| Potassium channel, two pore domain subfamily K, member 12                                       | KCNK12 | 715556    |
| Potassium channel, two pore domain subfamily K, member 13                                       | KCNK13 | 695445    |
| Potassium channel, two pore domain subfamily K, member 17                                       | KCNK17 | 719574    |
| Potassium channel, voltage gated eag related subfamily H,                                       | KCNH3  | 710838    |

|                                                                     |         |           |
|---------------------------------------------------------------------|---------|-----------|
| member 3                                                            |         |           |
| Potassium channel, voltage gated Shab related subfamily B, member 1 | KCNB1   | 703520    |
| Potassium channel, voltage gated Shal related subfamily D, member 1 | KCND1   | 711997    |
| Potassium channel, voltage gated Shaw related subfamily C, member 2 | KCNC2   | 100430904 |
| Potassium voltage-gated channel, Isk-related family, member 4       | KCNE4   | 706263    |
| Potassium voltage-gated channel, modifier subfamily S, member 1     | KCNS1   | 711715    |
| Potassium voltage-gated channel, modifier subfamily S, member 3     | KCNS3   | 700065    |
| POU class 2 homeobox 1                                              | POU2F1  | 700530    |
| PQ loop repeat containing 3                                         | PQLC3   | 696961    |
| PR domain containing 1, with ZNF domain                             | PRDM1   | 696757    |
| PR domain containing 2, with ZNF domain                             | PRDM2   | 716295    |
| PR domain containing 4                                              | PRDM4   | 704529    |
| PR domain containing 5                                              | PRDM5   | 708790    |
| PRA1 domain family member 2                                         | PRAF2   | 712436    |
| Praja ring finger 1, E3 ubiquitin protein ligase                    | PJA1    | 695038    |
| Pre-B-cell leukemia homeobox 1                                      | PBX1    | 694416    |
| Pre-B-cell leukemia homeobox 4                                      | PBX4    | 106994672 |
| Prefoldin subunit 2                                                 | PFDN2   | 719886    |
| Prefoldin subunit 5                                                 | PFDN5   | 702355    |
| PRELI domain containing 1                                           | PRELID1 | 699254    |
| Pre-mrna processing factor 31                                       | PRPF31  | 720567    |
| Pre-mrna processing factor 40 homolog A                             | PRPF40A | 696668    |
| Prepronociceptin                                                    | PNOC    | 713633    |
| Presenilin 1                                                        | PSEN1   | 696274    |
| Presenilin enhancer gamma secretase subunit                         | PSENEN  | 100429008 |
| Presequence translocase-associated motor 16 homolog (S. Cerevisiae) | PAM16   | 704987    |
| Prion protein                                                       | PRNP    | 717859    |
| Profilin family member 4                                            | PFN4    | 704416    |
| Progesterone receptor                                               | PGR     | 613024    |
| Progesterone receptor membrane component 1                          | PGRMC1  | 711792    |
| Programmed cell death 2                                             | PDCD2   | 696380    |
| Programmed cell death 2-like                                        | PDCD2L  | 705688    |
| Programmed cell death 5                                             | PDCD5   | 702277    |
| Programmed cell death 6                                             | PDCD6   | 723043    |
| Programmed cell death 7                                             | PDCD7   | 708758    |
| Prohibitin                                                          | PHB     | 699334    |
| Prohibitin 2                                                        | PHB2    | 714693    |
| Proliferating cell nuclear antigen                                  | PCNA    | 718006    |
| Proline and serine rich 1                                           | PROSER1 | 696606    |
| Proline rich 13                                                     | PRR13   | 702930    |
| Proline rich 15                                                     | PRR15   | 696869    |
| Proline rich 15-like                                                | PRR15L  | 695068    |

|                                                                                       |        |           |
|---------------------------------------------------------------------------------------|--------|-----------|
| Proline rich 3                                                                        | PRR3   | 711699    |
| Proline rich 7 (synaptic)                                                             | PRR7   | 700123    |
| Proline rich Gla (G-carboxyglutamic acid) 1                                           | PRRG1  | 696938    |
| Proline rich membrane anchor 1                                                        | PRIMA1 | 100426272 |
| Proline/serine-rich coiled-coil 1                                                     | PSRC1  | 698060    |
| Proline-rich coiled-coil 1                                                            | PRRC1  | 704248    |
| Proline-rich coiled-coil 2A                                                           | PRRC2A | 715715    |
| Prolyl 4-hydroxylase, alpha polypeptide II                                            | P4HA2  | 707157    |
| Prolyl 4-hydroxylase, transmembrane (endoplasmic reticulum)                           | P4HTM  | 708158    |
| Prolyl endopeptidase-like                                                             | PREPL  | 713980    |
| Prolylcarboxypeptidase                                                                | PRCP   | 701305    |
| Promyelocytic leukemia                                                                | PML    | 700379    |
| Propionyl-coa carboxylase alpha subunit                                               | PCCA   | 699844    |
| Propionyl-coa carboxylase beta subunit                                                | PCCB   | 716964    |
| Prostaglandin D2 receptor 2                                                           | PTGDR2 | 695853    |
| Prostaglandin D2 synthase                                                             | PTGDS  | 707990    |
| Prostaglandin-endoperoxide synthase 2 (prostaglandin G/H synthase and cyclooxygenase) | PTGS2  | 716671    |
| Protease, serine 23                                                                   | PRSS23 | 704537    |
| Protease, serine 27                                                                   | PRSS27 | 697848    |
| Protease, serine 55                                                                   | PRSS55 | 698379    |
| Proteasomal ATPase associated factor 1                                                | PAAF1  | 718755    |
| Proteasome (prosome, macropain) assembly chaperone 1                                  | PSMG1  | 715758    |
| Proteasome (prosome, macropain) assembly chaperone 2                                  | PSMG2  | 717110    |
| Proteasome (prosome, macropain) assembly chaperone 3                                  | PSMG3  | 697590    |
| Proteasome 26S subunit, ATPase 4                                                      | PSMC4  | 699847    |
| Proteasome 26S subunit, non-ATPase 1                                                  | PSMD1  | 711724    |
| Proteasome 26S subunit, non-ATPase 12                                                 | PSMD12 | 718756    |
| Proteasome 26S subunit, non-ATPase 6                                                  | PSMD6  | 698601    |
| Proteasome 26S subunit, non-ATPase 7                                                  | PSMD7  | 705581    |
| Proteasome activator subunit 2                                                        | PSME2  | 715288    |
| Proteasome maturation protein                                                         | POMP   | 711980    |
| Proteasome subunit alpha 1                                                            | PSMA1  | 701029    |
| Proteasome subunit alpha 2                                                            | PSMA2  | 701683    |
| Proteasome subunit alpha 3                                                            | PSMA3  | 700251    |
| Proteasome subunit alpha 4                                                            | PSMA4  | 710417    |
| Proteasome subunit alpha 5                                                            | PSMA5  | 698435    |
| Proteasome subunit alpha 6                                                            | PSMA6  | 695113    |
| Proteasome subunit beta 10                                                            | PSMB10 | 701088    |
| Proteasome subunit beta 2                                                             | PSMB2  | 712193    |
| Proteasome subunit beta 3                                                             | PSMB3  | 694318    |
| Proteasome subunit beta 4                                                             | PSMB4  | 710734    |
| Proteasome subunit beta 7                                                             | PSMB7  | 694567    |
| Proteasome subunit beta 9                                                             | PSMB9  | 716980    |
| Protection of telomeres 1                                                             | POT1   | 696751    |
| Protein arginine methyltransferase 5                                                  | PRMT5  | 712718    |
| Protein associated with topoisomerase II homolog 1 (yeast)                            | PATL1  | 699207    |
| Protein disulfide isomerase family A member 5                                         | PDIA5  | 715226    |

|                                                                                              |           |        |
|----------------------------------------------------------------------------------------------|-----------|--------|
| Protein geranylgeranyltransferase type I, beta subunit                                       | PGGT1B    | 696437 |
| Protein inhibitor of activated STAT 1                                                        | PIAS1     | 693445 |
| Protein inhibitor of activated STAT 2                                                        | PIAS2     | 696737 |
| Protein interacting with cyclin A1                                                           | PROCA1    | 709846 |
| Protein kinase, AMP-activated, alpha 2 catalytic subunit                                     | PRKAA2    | 717703 |
| Protein kinase, AMP-activated, beta 1 non-catalytic subunit                                  | PRKAB1    | 695737 |
| Protein kinase, camp-dependent, beta catalytic subunit                                       | PRKACB    | 709728 |
| Protein kinase, interferon-inducible double stranded RNA dependent activator                 | PRKRA     | 703063 |
| Protein odr-4 homolog                                                                        | C1H1orf27 | 713801 |
| Protein O-glucosyltransferase 1                                                              | POGLUT1   | 712357 |
| Protein O-linked mannose N-acetylglucosaminyltransferase 1 (beta 1,2-)                       | POMGNT1   | 707205 |
| Protein phosphatase 1 regulatory subunit 12C                                                 | PPP1R12C  | 698538 |
| Protein phosphatase 1 regulatory subunit 15A                                                 | PPP1R15A  | 718350 |
| Protein phosphatase 1 regulatory subunit 16A                                                 | PPP1R16A  | 702995 |
| Protein phosphatase 1 regulatory subunit 27                                                  | PPP1R27   | 714648 |
| Protein phosphatase 1 regulatory subunit 35                                                  | PPP1R35   | 712067 |
| Protein phosphatase 1, regulatory subunit 17                                                 | PPP1R17   | 694066 |
| Protein phosphatase 2 regulatory subunit A, alpha                                            | PPP2R1A   | 719929 |
| Protein phosphatase 2 regulatory subunit B", alpha                                           | PPP2R3A   | 717078 |
| Protein phosphatase 2 regulatory subunit B', gamma                                           | PPP2R5C   | 718894 |
| Protein phosphatase 2 regulatory subunit B", gamma                                           | PPP2R3C   | 694616 |
| Protein phosphatase 2, catalytic subunit, beta isozyme                                       | PPP2CB    | 695118 |
| Protein phosphatase 3, catalytic subunit, gamma isozyme                                      | PPP3CC    | 708233 |
| Protein phosphatase 4 catalytic subunit                                                      | PPP4C     | 708510 |
| Protein phosphatase 5, catalytic subunit                                                     | PPP5C     | 716214 |
| Protein phosphatase methylesterase 1                                                         | PPME1     | 718858 |
| Protein phosphatase, Mg2+/Mn2+ dependent 1A                                                  | PPM1A     | 702987 |
| Protein phosphatase, Mg2+/Mn2+ dependent 1B                                                  | PPM1B     | 713918 |
| Protein phosphatase, Mg2+/Mn2+ dependent 1F                                                  | PPM1F     | 698441 |
| Protein phosphatase, Mg2+/Mn2+ dependent 1G                                                  | PPM1G     | 700695 |
| Protein tyrosine phosphatase domain containing 1                                             | PTPDC1    | 707878 |
| Protein tyrosine phosphatase type IVA, member 2                                              | PTP4A2    | 706489 |
| Protein tyrosine phosphatase, non-receptor type 1                                            | PTPN1     | 702016 |
| Protein tyrosine phosphatase, non-receptor type 12                                           | PTPN12    | 721538 |
| Protein tyrosine phosphatase, non-receptor type 13 (APO-1/CD95 (Fas)-associated phosphatase) | PTPN13    | 699866 |
| Protein tyrosine phosphatase, non-receptor type 23                                           | PTPN23    | 711601 |
| Protein tyrosine phosphatase, non-receptor type 4 (megakaryocyte)                            | PTPN4     | 695516 |
| Protein tyrosine phosphatase, receptor type, D                                               | PTPRD     | 714954 |
| Protein-L-isoaspartate (D-aspartate) O-methyltransferase                                     | PCMT1     | 695893 |
| Proteolipid protein 2 (colonic epithelium-enriched)                                          | PLP2      | 712869 |
| Protocadherin 7                                                                              | PCDH7     | 696011 |
| Protocadherin alpha 5                                                                        | PCDHA5    | 692083 |
| Protoporphyrinogen oxidase                                                                   | PPOX      | 719910 |
| Pseudouridylate synthase 10                                                                  | PUS10     | 717862 |

|                                                              |          |           |
|--------------------------------------------------------------|----------|-----------|
| PTPRF interacting protein, binding protein 1 (liprin beta 1) | PPFIBP1  | 709742    |
| Pumilio RNA binding family member 1                          | PUM1     | 704848    |
| Pumilio RNA binding family member 2                          | PUM2     | 701782    |
| Purinergic receptor P2Y, G-protein coupled, 11               | P2RY11   | 100533472 |
| Purinergic receptor P2Y, G-protein coupled, 13               | P2RY13   | 106997048 |
| Putative homeodomain transcription factor 2                  | PHTF2    | 693552    |
| PWP2 periodic tryptophan protein homolog (yeast)             | PWP2     | 722216    |
| PYM homolog 1, exon junction complex associated factor       | PYM1     | 708148    |
| Pyrimidinergic receptor P2Y, G-protein coupled, 4            | P2RY4    | 695127    |
| Pyrroline-5-carboxylate reductase 1                          | PYCR1    | 715182    |
| Pyruvate dehydrogenase (lipoamide) alpha 1                   | PDHA1    | 100423992 |
| Pyruvate dehydrogenase (lipoamide) beta                      | PDHB     | 574227    |
| Pyruvate dehydrogenase phosphatase regulatory subunit        | PDPR     | 709861    |
| Rab acceptor 1 (prenylated)                                  | RABAC1   | 706397    |
| Rab geranylgeranyltransferase, beta subunit                  | RABGGTB  | 705421    |
| RAB, member of RAS oncogene family-like 2B                   | RABL2B   | 716615    |
| RAB, member of RAS oncogene family-like 3                    | RABL3    | 713621    |
| RAB18, member RAS oncogene family                            | RAB18    | 708843    |
| RAB1B, member RAS oncogene family                            | RAB1B    | 721852    |
| RAB20, member RAS oncogene family                            | RAB20    | 694578    |
| RAB23, member RAS oncogene family                            | RAB23    | 712860    |
| RAB3 gtpase activating non-catalytic protein subunit 2       | RAB3GAP2 | 706252    |
| RAB30, member RAS oncogene family                            | RAB30    | 701550    |
| RAB32, member RAS oncogene family                            | RAB32    | 702431    |
| RAB33B, member RAS oncogene family                           | RAB33B   | 697603    |
| RAB37, member RAS oncogene family                            | RAB37    | 698842    |
| RAB3A interacting protein                                    | RAB3IP   | 717215    |
| RAB4A, member RAS oncogene family                            | RAB4A    | 694288    |
| RAB5A, member RAS oncogene family                            | RAB5A    | 697712    |
| RAB5B, member RAS oncogene family                            | RAB5B    | 708347    |
| RAB6A, member RAS oncogene family                            | RAB6A    | 718717    |
| RAB8B, member RAS oncogene family                            | RAB8B    | 705597    |
| Rabenosyn, RAB effector                                      | RBSN     | 702356    |
| Rac gtpase activating protein 1                              | RACGAP1  | 711887    |
| RAD17 checkpoint clamp loader component                      | RAD17    | 700116    |
| RAD50 interactor 1                                           | RINT1    | 698414    |
| RAD51 associated protein 1                                   | RAD51AP1 | 710918    |
| RAD51 paralog C                                              | RAD51C   | 714828    |
| RAD52 motif containing 1                                     | RDM1     | 716624    |
| RAD9 checkpoint clamp component A                            | RAD9A    | 712345    |
| RAD9-HUS1-RAD1 interacting nuclear orphan 1                  | RHNO1    | 709008    |
| Radial spoke head 1 homolog (Chlamydomonas)                  | RSPH1    | 714394    |
| Raf-1 proto-oncogene, serine/threonine kinase                | RAF1     | 694725    |
| Raftlin family member 2                                      | RFTN2    | 697562    |
| Raftlin, lipid raft linker 1                                 | RFTN1    | 695142    |
| Ral GEF with PH domain and SH3 binding motif 1               | RALGPS1  | 708253    |
| Ral gtpase activating protein, alpha subunit 1 (catalytic)   | RALGAPA1 | 695674    |
| Ral gtpase activating protein, beta subunit (non-catalytic)  | RALGAPB  | 705742    |

|                                                                 |         |        |
|-----------------------------------------------------------------|---------|--------|
| RALBP1 associated Eps domain containing 2                       | REPS2   | 721024 |
| RALY heterogeneous nuclear ribonucleoprotein                    | RALY    | 713317 |
| RAN binding protein 1                                           | RANBP1  | 719448 |
| RAN binding protein 10                                          | RANBP10 | 700911 |
| RAN binding protein 17                                          | RANBP17 | 701214 |
| RAN binding protein 6                                           | RANBP6  | 715799 |
| Ran gtpase activating protein 1                                 | RANGAP1 | 710698 |
| RAN guanine nucleotide release factor                           | RANGRF  | 717206 |
| Ranbp-type and C3HC4-type zinc finger containing 1              | RBCK1   | 714692 |
| Rap guanine nucleotide exchange factor 2                        | RAPGEF2 | 704717 |
| RAP2A, member of RAS oncogene family                            | RAP2A   | 697215 |
| RAR-related orphan receptor A                                   | RORA    | 704014 |
| RAR-related orphan receptor B                                   | RORB    | 703310 |
| RAR-related orphan receptor C                                   | RORC    | 717052 |
| RAS and EF-hand domain containing                               | RASEF   | 708296 |
| Ras association (ralgds/AF-6) and pleckstrin homology domains 1 | RAPH1   | 705065 |
| Ras association (ralgds/AF-6) domain family member 4            | RASSF4  | 706096 |
| Ras homolog family member B                                     | RHOB    | 702141 |
| Ras homolog family member C                                     | RHOC    | 706034 |
| Ras homolog family member D                                     | RHOD    | 712969 |
| Ras homolog family member G                                     | RHOG    | 718113 |
| Ras homolog family member J                                     | RHOJ    | 705603 |
| RAS p21 protein activator (gtpase activating protein) 1         | RASA1   | 694085 |
| RAS p21 protein activator 2                                     | RASA2   | 715074 |
| RAS protein activator like 2                                    | RASAL2  | 718958 |
| RAS, dexamethasone-induced 1                                    | RASD1   | 698839 |
| RAS-like family 10 member A                                     | RASL10A | 714587 |
| RAS-like family 11 member A                                     | RASL11A | 710394 |
| Ras-like without CAAX 1                                         | RIT1    | 717985 |
| Ras-related GTP binding C                                       | RRAGC   | 715549 |
| RB1 inducible coiled-coil 1                                     | RB1CC1  | 710330 |
| RBPJ interacting and tubulin associated 1                       | RITA1   | 712837 |
| RCSD domain containing 1                                        | RCSD1   | 701239 |
| Reactive oxygen species modulator 1                             | ROMO1   | 711369 |
| Rearranged L-myc fusion                                         | RLF     | 693503 |
| REC8 meiotic recombination protein                              | REC8    | 715430 |
| Receptor (G protein-coupled) activity modifying protein 1       | RAMP1   | 574329 |
| Receptor accessory protein 1                                    | REEP1   | 697390 |
| Receptor accessory protein 3                                    | REEP3   | 697494 |
| Receptor accessory protein 4                                    | REEP4   | 707267 |
| Receptor interacting serine/threonine kinase 4                  | RIPK4   | 715077 |
| Receptor tyrosine kinase-like orphan receptor 1                 | ROR1    | 700760 |
| Recq helicase-like                                              | RECQL   | 705871 |
| Regucalcin                                                      | RGN     | 705733 |
| Regulation of nuclear pre-mrna domain containing 1A             | RPRD1A  | 709217 |
| Regulator of G-protein signaling 10                             | RGS10   | 703125 |
| Regulator of G-protein signaling 14                             | RGS14   | 699625 |
| Regulator of G-protein signaling 22                             | RGS22   | 704685 |

|                                                            |          |        |
|------------------------------------------------------------|----------|--------|
| Regulator of G-protein signaling 6                         | RGS6     | 694620 |
| Regulator of G-protein signaling 7                         | RGS7     | 707747 |
| Regulator of microtubule dynamics 1                        | RMDN1    | 694237 |
| Regulatory factor X associated ankyrin containing protein  | RFXANK   | 719706 |
| RELT-like 2                                                | RELL2    | 704673 |
| Renin                                                      | REN      | 574299 |
| Replication factor C subunit 3                             | RFC3     | 714220 |
| Replication factor C subunit 5                             | RFC5     | 694166 |
| Replication protein A3                                     | RPA3     | 696248 |
| Replication protein A4                                     | RPA4     | 699274 |
| Replication timing regulatory factor 1                     | RIF1     | 694817 |
| REST corepressor 1                                         | RCOR1    | 694670 |
| REST corepressor 3                                         | RCOR3    | 712037 |
| Retbindin                                                  | RTBDN    | 716766 |
| Reticulon 4                                                | RTN4     | 619181 |
| Reticulon 4 interacting protein 1                          | RTN4IP1  | 697236 |
| Retinoblastoma 1                                           | RB1      | 704871 |
| Retinoblastoma binding protein 4                           | RBBP4    | 708710 |
| Retinoblastoma binding protein 8                           | RBBP8    | 677718 |
| Retinoic acid induced 1                                    | RAI1     | 699215 |
| Retinoic acid receptor responder (tazarotene induced) 2    | RARRES2  | 704993 |
| Retinoic acid receptor, gamma                              | RARG     | 699532 |
| Retinol binding protein 5                                  | RBP5     | 715060 |
| Retinol dehydrogenase 12 (all-trans/9-cis/11-cis)          | RDH12    | 711438 |
| Retinol dehydrogenase 5 (11-cis/9-cis)                     | RDH5     | 709644 |
| Reversion-inducing-cysteine-rich protein with kazal motifs | RECK     | 694043 |
| RFT1 homolog                                               | RFT1     | 694586 |
| Rh family, C glycoprotein                                  | RHCG     | 664731 |
| Rho family gtpase 3                                        | RND3     | 694168 |
| Rho gtpase activating protein 18                           | ARHGAP18 | 711107 |
| Rho gtpase activating protein 21                           | ARHGAP21 | 706428 |
| Rho gtpase activating protein 25                           | ARHGAP25 | 699828 |
| Rho gtpase activating protein 6                            | ARHGAP6  | 709978 |
| Rho guanine nucleotide exchange factor (GEF) 3             | ARHGEF3  | 704764 |
| Rho guanine nucleotide exchange factor 1                   | ARHGEF1  | 722198 |
| Rho guanine nucleotide exchange factor 10                  | ARHGEF10 | 722745 |
| Rho guanine nucleotide exchange factor 17                  | ARHGEF17 | 718644 |
| Rhomboid 5 homolog 2 (Drosophila)                          | RHBDF2   | 707033 |
| Rho-related BTB domain containing 1                        | RHOBTB1  | 699132 |
| Rhotekin                                                   | RTKN     | 708722 |
| Ribonuclease H1                                            | RNASEH1  | 707122 |
| Ribonuclease H2 subunit A                                  | RNASEH2A | 716701 |
| Ribonuclease H2 subunit B                                  | RNASEH2B | 707995 |
| Ribonuclease P/MRP 14kda subunit                           | RPP14    | 706788 |
| Ribonuclease P/MRP 21kda subunit                           | RPP21    | 713056 |
| Ribonuclease P/MRP 30kda subunit                           | RPP30    | 696537 |
| Ribonuclease P/MRP 40kda subunit                           | RPP40    | 710505 |
| Ribonuclease, rnase A family, 1 (pancreatic)               | RNASE1   | 704676 |



|                                                   |          |           |
|---------------------------------------------------|----------|-----------|
| Ribonuclease, rnase A family, 4                   | RNASE4   | 703903    |
| Ribonuclease, rnase K                             | RNASEK   | 100423496 |
| Ribonucleic acid export 1                         | RAE1     | 696706    |
| Ribonucleoprotein, PTB-binding 1                  | RAVER1   | 715250    |
| Ribophorin I                                      | RPN1     | 705437    |
| Ribophorin II                                     | RPN2     | 708971    |
| Ribosomal protein l10a                            | RPL10A   | 718783    |
| Ribosomal protein L13                             | RPL13    | 700603    |
| Ribosomal protein L17                             | RPL17    | 698967    |
| Ribosomal protein L22                             | RPL22    | 703050    |
| Ribosomal protein L23                             | RPL23    | 694719    |
| Ribosomal protein l23a                            | RPL23A   | 710490    |
| Ribosomal protein L24                             | RPL24    | 702381    |
| Ribosomal protein L26                             | RPL26    | 717378    |
| Ribosomal protein L26 like 1                      | RPL26L1  | 703230    |
| Ribosomal protein L27                             | RPL27    | 712352    |
| Ribosomal protein l27a                            | RPL27A   | 708863    |
| Ribosomal protein L29                             | RPL29    | 698602    |
| Ribosomal protein L3                              | RPL3     | 707176    |
| Ribosomal protein L30                             | RPL30    | 703120    |
| Ribosomal protein L35                             | RPL35    | 693604    |
| Ribosomal protein l35a                            | RPL35A   | 714858    |
| Ribosomal protein L4                              | RPL4     | 710590    |
| Ribosomal protein l7a                             | RPL7A    | 722215    |
| Ribosomal protein L8                              | RPL8     | 708535    |
| Ribosomal protein S10                             | RPS10    | 718606    |
| Ribosomal protein S11                             | RPS11    | 718844    |
| Ribosomal protein S13                             | RPS13    | 697513    |
| Ribosomal protein S14                             | RPS14    | 710901    |
| Ribosomal protein S15                             | RPS15    | 707241    |
| Ribosomal protein S16                             | RPS16    | 697219    |
| Ribosomal protein S17-like                        | RPS17L   | 100425104 |
| Ribosomal protein S19 binding protein 1           | RPS19BP1 | 704079    |
| Ribosomal protein S2                              | RPS2     | 693615    |
| Ribosomal protein S21                             | RPS21    | 699565    |
| Ribosomal protein S27                             | RPS27    | 106992520 |
| Ribosomal protein S27 like                        | RPS27L   | 705483    |
| Ribosomal protein s27a                            | RPS27A   | 718909    |
| Ribosomal protein S28                             | RPS28    | 707133    |
| Ribosomal protein S4, X-linked                    | RPS4X    | 699397    |
| Ribosomal protein S5                              | RPS5     | 711259    |
| Ribosomal protein S6 kinase, 90kda, polypeptide 4 | RPS6KA4  | 717574    |
| Ribosomal protein S6 kinase, 90kda, polypeptide 6 | RPS6KA6  | 710337    |
| Ribosomal protein S7                              | RPS7     | 721900    |
| Ribosomal protein S8                              | RPS8     | 703957    |
| Ribosomal protein S9                              | RPS9     | 694053    |
| Ribosomal protein, large, P0                      | RPLP0    | 574363    |
| Ribosomal protein, large, P1                      | RPLP1    | 695442    |

|                                                                                       |         |           |
|---------------------------------------------------------------------------------------|---------|-----------|
| Ribosomal protein, large, P2                                                          | RPLP2   | 700698    |
| Ribosomal RNA adenine dimethylase domain containing 1                                 | RRNAD1  | 718599    |
| Ribosomal RNA processing 12 homolog                                                   | RRP12   | 705854    |
| Ribosomal RNA processing 8, methyltransferase, homolog (yeast)                        | RRP8    | 712011    |
| Ribosomal RNA processing 9, small subunit (SSU) processome component, homolog (yeast) | RRP9    | 699421    |
| Ribosome production factor 1 homolog                                                  | RPF1    | 710286    |
| Ring finger and WD repeat domain 2, E3 ubiquitin protein ligase                       | RFWD2   | 708802    |
| Ring finger protein (C3H2C3 type) 6                                                   | RNF6    | 721550    |
| Ring finger protein 112                                                               | RNF112  | 703312    |
| Ring finger protein 115                                                               | RNF115  | 697067    |
| Ring finger protein 130                                                               | RNF130  | 715356    |
| Ring finger protein 14                                                                | RNF14   | 705363    |
| Ring finger protein 146                                                               | RNF146  | 712152    |
| Ring finger protein 167                                                               | RNF167  | 710656    |
| Ring finger protein 185                                                               | RNF185  | 718351    |
| Ring finger protein 20                                                                | RNF20   | 713614    |
| Ring finger protein 208                                                               | RNF208  | 705563    |
| Ring finger protein 219                                                               | RNF219  | 697577    |
| Ring finger protein 32                                                                | RNF32   | 716703    |
| Ring finger protein 34, E3 ubiquitin protein ligase                                   | RNF34   | 700062    |
| Ring finger protein 38                                                                | RNF38   | 693346    |
| Ring finger protein, LIM domain interacting                                           | RLIM    | 703471    |
| RIO kinase 2                                                                          | RIOK2   | 700738    |
| Ripply transcriptional repressor 3                                                    | RIPPLY3 | 100429272 |
| RNA 2',3'-cyclic phosphate and 5'-OH ligase                                           | RTCB    | 717258    |
| RNA 3'-terminal phosphate cyclase                                                     | RTCA    | 711623    |
| RNA binding motif protein 10                                                          | RBM10   | 711791    |
| RNA binding motif protein 12B                                                         | RBM12B  | 698382    |
| RNA binding motif protein 15                                                          | RBM15   | 701414    |
| RNA binding motif protein 17                                                          | RBM17   | 712996    |
| RNA binding motif protein 22                                                          | RBM22   | 712713    |
| RNA binding motif protein 27                                                          | RBM27   | 707688    |
| RNA binding motif protein 39                                                          | RBM39   | 704198    |
| RNA binding motif protein 42                                                          | RBM42   | 709852    |
| RNA binding motif protein 45                                                          | RBM45   | 702714    |
| RNA binding motif protein 5                                                           | RBM5    | 704114    |
| RNA binding motif protein, X-linked 2                                                 | RBMX2   | 703472    |
| RNA binding motif, single stranded interacting protein 1                              | RBMS1   | 703608    |
| RNA binding motif, single stranded interacting protein 2                              | RBMS2   | 713163    |
| RNA binding motif, single stranded interacting protein 3                              | RBMS3   | 702852    |
| RNA binding protein S1, serine-rich domain                                            | RNPS1   | 695816    |
| RNA binding protein with multiple splicing                                            | RPMS    | 694363    |
| RNA exonuclease 2                                                                     | REXO2   | 695292    |
| RNA polymerase II associated protein 3                                                | RPAP3   | 703749    |
| RNA pseudouridylate synthase domain containing 3                                      | RPUSD3  | 700349    |
| Rotatin                                                                               | RTTN    | 703989    |

|                                                                             |          |           |
|-----------------------------------------------------------------------------|----------|-----------|
| Round spermatid basic protein 1-like                                        | RSBN1L   | 693814    |
| RPGRIP1-like                                                                | RPGRIP1L | 697345    |
| RPTOR independent companion of MTOR, complex 2                              | RICTOR   | 694915    |
| RRN3 homolog, RNA polymerase I transcription factor                         | RRN3     | 713500    |
| RUN domain containing 3B                                                    | RUNDC3B  | 705821    |
| Runt-related transcription factor 1; translocated to, 1 (cyclin D -related) | RUNX1T1  | 696934    |
| Ruvb-like AAA ATPase 2                                                      | RUVBL2   | 100428792 |
| RWD domain containing 2A                                                    | RWDD2A   | 694598    |
| RWD domain containing 3                                                     | RWDD3    | 709817    |
| S100 calcium binding protein A2                                             | S100A2   | 715264    |
| S100 calcium binding protein A6                                             | S100A6   | 715169    |
| SAC1 suppressor of actin mutations 1-like (yeast)                           | SACM1L   | 714107    |
| SAC3 domain containing 1                                                    | SAC3D1   | 717043    |
| SAGA complex associated factor 29                                           | SGF29    | 709124    |
| SAP30 binding protein                                                       | SAP30BP  | 703077    |
| SAP30-like                                                                  | SAP30L   | 714400    |
| Sarcoglycan epsilon                                                         | SGCE     | 700104    |
| Sarcolemma associated protein                                               | SLMAP    | 703086    |
| Scaffold attachment factor B                                                | SAFB     | 696356    |
| SCAN domain containing 1                                                    | SCAND1   | 711046    |
| Scavenger receptor class F member 2                                         | SCARF2   | 695466    |
| Schlafen like 1                                                             | SLFNL1   | 695605    |
| SCY1-like, kinase-like 2                                                    | SCYL2    | 695284    |
| SCY1-like, kinase-like 3                                                    | SCYL3    | 701768    |
| SEC13 homolog, nuclear pore and COPII coat complex component                | SEC13    | 697339    |
| SEC22 homolog A, vesicle trafficking protein                                | SEC22A   | 715277    |
| SEC22 homolog C, vesicle trafficking protein                                | SEC22C   | 716351    |
| Sec23 homolog A, COPII coat complex component                               | SEC23A   | 698500    |
| Sec23 homolog B, COPII coat complex component                               | SEC23B   | 698440    |
| SEC24 homolog C, COPII coat complex component                               | SEC24C   | 714688    |
| SEC24 homolog D, COPII coat complex component                               | SEC24D   | 707521    |
| SEC31 homolog A, COPII coat complex component                               | SEC31A   | 693687    |
| Sec61 translocon alpha 1 subunit                                            | SEC61A1  | 709787    |
| Sec61 translocon alpha 2 subunit                                            | SEC61A2  | 100427728 |
| Sec61 translocon beta subunit                                               | SEC61B   | 717815    |
| Sec61 translocon gamma subunit                                              | SEC61G   | 716898    |
| SEC62 homolog, preprotein translocation factor                              | SEC62    | 696989    |
| Secernin 2                                                                  | SCRN2    | 694571    |
| SECIS binding protein 2                                                     | SECISBP2 | 697442    |
| Secreted frizzled-related protein 1                                         | SFRP1    | 702876    |
| Secreted frizzled-related protein 4                                         | SFRP4    | 574393    |
| Secreted frizzled-related protein 5                                         | SFRP5    | 707738    |
| Secretion associated, Ras related gtpase 1A                                 | SAR1A    | 711277    |
| Secretoglobulin, family 1D, member 1                                        | SCGB1D1  | 718936    |
| Secretogranin V                                                             | SCG5     | 694088    |
| Secretory carrier membrane protein 2                                        | SCAMP2   | 709720    |

|                                                                                               |           |           |
|-----------------------------------------------------------------------------------------------|-----------|-----------|
| Secretory leukocyte peptidase inhibitor                                                       | SLPI      | 711156    |
| Sedoheptulokinase                                                                             | SHPK      | 721465    |
| Sel-1 suppressor of lin-12-like 3 (C. Elegans)                                                | SEL1L3    | 695033    |
| Selenoprotein K                                                                               | SELK      | 693421    |
| Selenoprotein M                                                                               | SELM      | 718290    |
| Selenoprotein P, plasma, 1                                                                    | SEPP1     | 698917    |
| Selenoprotein W, 1                                                                            | SEPW1     | 718370    |
| Sema domain, immunoglobulin domain (Ig), short basic domain, secreted, (semaphorin) 3C        | SEMA3C    | 708633    |
| Sema domain, immunoglobulin domain (Ig), short basic domain, secreted, (semaphorin) 3F        | SEMA3F    | 703995    |
| Sema domain, transmembrane domain (TM), and cytoplasmic domain, (semaphorin) 6D               | SEMA6D    | 713885    |
| Serglycin                                                                                     | SRGN      | 712299    |
| Serine carboxypeptidase 1                                                                     | SCPEP1    | 708197    |
| Serine dehydratase-like                                                                       | SDSL      | 714721    |
| Serine incorporator 1                                                                         | SERINC1   | 713999    |
| Serine palmitoyltransferase small subunit A                                                   | SPTSSA    | 717580    |
| Serine peptidase inhibitor, Kazal type 5                                                      | SPINK5    | 709424    |
| Serine peptidase inhibitor, Kazal type 6                                                      | SPINK6    | 709586    |
| Serine peptidase inhibitor, Kunitz type, 2                                                    | SPINT2    | 714755    |
| Serine/arginine repetitive matrix 1                                                           | SRRM1     | 712258    |
| Serine/arginine-rich splicing factor 1                                                        | SRSF1     | 713958    |
| Serine/arginine-rich splicing factor 12                                                       | SRSF12    | 700497    |
| Serine/arginine-rich splicing factor 3                                                        | SRSF3     | 719123    |
| Serine/arginine-rich splicing factor 4                                                        | SRSF4     | 717401    |
| Serine/arginine-rich splicing factor 7                                                        | SRSF7     | 713388    |
| Serine/arginine-rich splicing factor 8                                                        | SRSF8     | 699079    |
| Serine/threonine kinase 11 interacting protein                                                | STK11IP   | 704531    |
| Serine/threonine kinase 25                                                                    | STK25     | 701297    |
| Serine/threonine kinase 3                                                                     | STK3      | 707425    |
| Serine/threonine kinase 35                                                                    | STK35     | 716423    |
| Serine/threonine kinase 36                                                                    | STK36     | 699940    |
| Serine/threonine protein kinase 26                                                            | STK26     | 707739    |
| Serine/threonine/tyrosine kinase 1                                                            | STYK1     | 717844    |
| Serologically defined colon cancer antigen 8                                                  | SDCCAG8   | 705545    |
| Serpin peptidase inhibitor, clade A (alpha-1 antiproteinase, antitrypsin), member 3           | SERPINA3  | 574106    |
| Serpin peptidase inhibitor, clade A (alpha-1 antiproteinase, antitrypsin), member 6           | SERPINA6  | 701121    |
| Serpin peptidase inhibitor, clade B (ovalbumin), member 10                                    | SERPINB10 | 100430160 |
| Serpin peptidase inhibitor, clade B (ovalbumin), member 7                                     | SERPINB7  | 701671    |
| Serpin peptidase inhibitor, clade C (antithrombin), member 1                                  | SERPINC1  | 708854    |
| Serpin peptidase inhibitor, clade E (nexin, plasminogen activator inhibitor type 1), member 2 | SERPINE2  | 707121    |
| Serpin peptidase inhibitor, clade G (C1 inhibitor), member 1                                  | SERPING1  | 703928    |
| Serpin peptidase inhibitor, clade I (neuroserpin), member 1                                   | SERPINI1  | 699483    |
| SERPINE1 mrna binding protein 1                                                               | SERBP1    | 700797    |

|                                                                        |          |           |
|------------------------------------------------------------------------|----------|-----------|
| Serum amyloid A like 1                                                 | SAAL1    | 695747    |
| Serum deprivation response                                             | SDPR     | 694299    |
| Sestrin 1                                                              | SESN1    | 700232    |
| Sestrin 2                                                              | SESN2    | 716904    |
| Sestrin 3                                                              | SESN3    | 699329    |
| SET and MYND domain containing 2                                       | SMYD2    | 709375    |
| SET and MYND domain containing 3                                       | SMYD3    | 703402    |
| SET binding protein 1                                                  | SETBP1   | 699652    |
| SET domain containing (lysine methyltransferase) 7                     | SETD7    | 700426    |
| SET domain containing 2                                                | SETD2    | 711825    |
| SET domain containing 3                                                | SETD3    | 705369    |
| SET domain containing 5                                                | SETD5    | 704174    |
| SET domain containing 9                                                | SETD9    | 708019    |
| SET domain, bifurcated 1                                               | SETDB1   | 716141    |
| Sex comb on midleg-like 1 (Drosophila)                                 | SCML1    | 714239    |
| SFI1 centrin binding protein                                           | SFI1     | 716833    |
| SFT2 domain containing 3                                               | SFT2D3   | 699830    |
| SGT1 homolog, MIS12 kinetochore complex assembly<br>cochaperone        | SUGT1    | 694046    |
| SH2 domain containing 2A                                               | SH2D2A   | 718686    |
| SH2 domain containing 3C                                               | SH2D3C   | 699706    |
| SH2B adaptor protein 2                                                 | SH2B2    | 714861    |
| SH3 domain binding glutamate-rich protein                              | SH3BGR   | 722581    |
| SH3 domain containing ring finger 1                                    | SH3RF1   | 694082    |
| SH3-domain binding protein 1                                           | SH3BP1   | 700647    |
| SH3-domain binding protein 4                                           | SH3BP4   | 693393    |
| SH3-domain GRB2-like endophilin B1                                     | SH3GLB1  | 712393    |
| SHANK associated RH domain interactor                                  | SHARPIN  | 713534    |
| SHC (Src homology 2 domain containing) family member 4                 | SHC4     | 714611    |
| SHC (Src homology 2 domain containing) transforming protein 1          | SHC1     | 718982    |
| SHOC2 leucine-rich repeat scaffold protein                             | SHOC2    | 695572    |
| Shroom family member 3                                                 | SHROOM3  | 699613    |
| Shugoshin-like 1 (S. Pombe)                                            | SGOL1    | 698231    |
| Siah E3 ubiquitin protein ligase 1                                     | SIAH1    | 716629    |
| Siah E3 ubiquitin protein ligase 2                                     | SIAH2    | 710222    |
| Sialic acid binding Ig-like lectin 10                                  | SIGLEC10 | 719648    |
| Sideroflexin 1                                                         | SFXN1    | 695107    |
| Sideroflexin 2                                                         | SFXN2    | 713841    |
| Sideroflexin 4                                                         | SFXN4    | 702765    |
| Signal peptidase complex subunit 1                                     | SPCS1    | 696426    |
| Signal peptidase complex subunit 3                                     | SPCS3    | 100429720 |
| Signal peptide, CUB domain, EGF-like 2                                 | SCUBE2   | 708152    |
| Signal recognition particle 68kda                                      | SRP68    | 705568    |
| Signal sequence receptor, alpha                                        | SSR1     | 693818    |
| Signal sequence receptor, beta (translocon-associated<br>protein beta) | SSR2     | 719383    |
| Signal sequence receptor, delta                                        | SSR4     | 697266    |
| Signal transducer and activator of transcription 1                     | STAT1    | 693650    |

|                                                                                       |         |           |
|---------------------------------------------------------------------------------------|---------|-----------|
| Sin3A associated protein 18kda                                                        | SAP18   | 703078    |
| Sin3A associated protein 25kda                                                        | SAP25   | 106997576 |
| Sin3A associated protein 30kda                                                        | SAP30   | 696519    |
| Single stranded DNA binding protein 4                                                 | SSBP4   | 719496    |
| Single-stranded DNA binding protein 1, mitochondrial                                  | SSBP1   | 694459    |
| Single-strand-selective monofunctional uracil-DNA<br>glycosylase 1                    | SMUG1   | 704743    |
| Sirtuin 4                                                                             | SIRT4   | 720498    |
| Sirtuin 5                                                                             | SIRT5   | 700855    |
| Sirtuin 7                                                                             | SIRT7   | 715069    |
| SIVA1, apoptosis-inducing factor                                                      | SIVA1   | 706688    |
| SIX homeobox 5                                                                        | SIX5    | 715373    |
| Sjogren syndrome nuclear autoantigen 1                                                | SSNA1   | 706507    |
| SKI-like proto-oncogene                                                               | SKIL    | 696680    |
| Slingshot protein phosphatase 2                                                       | SSH2    | 711898    |
| SLIT and NTRK like family member 1                                                    | SLITRK1 | 699217    |
| SLU7 homolog, splicing factor                                                         | SLU7    | 696023    |
| SLX4 interacting protein                                                              | SLX4IP  | 718563    |
| SMAD family member 1                                                                  | SMAD1   | 574340    |
| Smad nuclear interacting protein 1                                                    | SNIP1   | 713733    |
| Small arfgap2                                                                         | SMAP2   | 694502    |
| Small integral membrane protein 11A                                                   | SMIM11A | 702792    |
| Small integral membrane protein 13                                                    | SMIM13  | 703387    |
| Small nuclear ribonucleoprotein D2 polypeptide                                        | SNRPD2  | 715183    |
| Small nuclear ribonucleoprotein polypeptide A                                         | SNRPA   | 702730    |
| Small nuclear ribonucleoprotein polypeptide E                                         | SNRPE   | 701418    |
| Small nuclear ribonucleoprotein polypeptide G                                         | SNRPG   | 702586    |
| Small nuclear ribonucleoprotein polypeptides B and B1                                 | SNRPB   | 716578    |
| Small nuclear RNA activating complex polypeptide 2                                    | SNAPC2  | 706176    |
| Small ubiquitin-like modifier 1                                                       | SUMO1   | 703644    |
| Small vasohibin binding protein                                                       | SVBP    | 698308    |
| SMG7 nonsense mediated mrna decay factor                                              | SMG7    | 717603    |
| SMG8 nonsense mediated mrna decay factor                                              | SMG8    | 711172    |
| SMG9 nonsense mediated mrna decay factor                                              | SMG9    | 710940    |
| Smoothelin                                                                            | SMTN    | 716424    |
| Smoothened, frizzled class receptor                                                   | SMO     | 701334    |
| Smu-1 suppressor of mec-8 and unc-52 homolog (C. Elegans)                             | SMU1    | 703656    |
| SMYD family member 5                                                                  | SMYD5   | 705926    |
| SNAP-associated protein                                                               | SNAPIN  | 715546    |
| SNF related kinase                                                                    | SNRK    | 715803    |
| SNRPN upstream reading frame                                                          | SNURF   | 711028    |
| Sodium channel modifier 1                                                             | SCNM1   | 709922    |
| Sodium channel, non voltage gated 1 beta subunit                                      | SCNN1B  | 700093    |
| Sodium channel, voltage gated, type III alpha subunit                                 | SCN3A   | 703178    |
| Solute carrier family 11 (proton-coupled divalent metal ion<br>transporter), member 2 | SLC11A2 | 693986    |
| Solute carrier family 12 (potassium/chloride transporter),<br>member 6                | SLC12A6 | 697536    |

|                                                                                              |          |        |
|----------------------------------------------------------------------------------------------|----------|--------|
| Solute carrier family 12 (sodium/potassium/chloride transporter), member 2                   | SLC12A2  | 704672 |
| Solute carrier family 15 (oligopeptide transporter), member 1                                | SLC15A1  | 574257 |
| Solute carrier family 15 (oligopeptide transporter), member 3                                | SLC15A3  | 696060 |
| Solute carrier family 16 member 11                                                           | SLC16A11 | 721775 |
| Solute carrier family 16, member 2 (thyroid hormone transporter)                             | SLC16A2  | 703252 |
| Solute carrier family 17 (vesicular glutamate transporter), member 8                         | SLC17A8  | 695508 |
| Solute carrier family 18 (vesicular monoamine transporter), member 2                         | SLC18A2  | 701133 |
| Solute carrier family 18, subfamily B, member 1                                              | SLC18B1  | 708518 |
| Solute carrier family 19 (thiamine transporter), member 2                                    | SLC19A2  | 700684 |
| Solute carrier family 2 (facilitated glucose transporter), member 13                         | SLC2A13  | 697822 |
| Solute carrier family 2 (facilitated glucose transporter), member 3                          | SLC2A3   | 715915 |
| Solute carrier family 20 (phosphate transporter), member 1                                   | SLC20A1  | 699462 |
| Solute carrier family 22 (organic anion transporter), member 6                               | SLC22A6  | 718377 |
| Solute carrier family 22 (organic anion transporter), member 8                               | SLC22A8  | 718363 |
| Solute carrier family 22 member 14                                                           | SLC22A14 | 696120 |
| Solute carrier family 22 member 15                                                           | SLC22A15 | 710102 |
| Solute carrier family 22 member 17                                                           | SLC22A17 | 713765 |
| Solute carrier family 22 member 18                                                           | SLC22A18 | 721230 |
| Solute carrier family 24 (sodium/potassium/calcium exchanger), member 4                      | SLC24A4  | 697997 |
| Solute carrier family 25 (aspartate/glutamate carrier), member 12                            | SLC25A12 | 695173 |
| Solute carrier family 25 (carnitine/acylcarnitine translocase), member 20                    | SLC25A20 | 709029 |
| Solute carrier family 25 (mitochondrial carrier, brain), member 14                           | SLC25A14 | 703255 |
| Solute carrier family 25 (mitochondrial carrier; adenine nucleotide translocator), member 31 | SLC25A31 | 710042 |
| Solute carrier family 25 (mitochondrial carrier; adenine nucleotide translocator), member 5  | SLC25A5  | 693502 |
| Solute carrier family 25 (mitochondrial carrier; adenine nucleotide translocator), member 6  | SLC25A6  | 719811 |
| Solute carrier family 25 (mitochondrial carrier; citrate transporter), member 1              | SLC25A1  | 719075 |
| Solute carrier family 25 (mitochondrial carrier; oxoglutarate carrier), member 11            | SLC25A11 | 710569 |
| Solute carrier family 25 (mitochondrial carrier; phosphate carrier), member 24               | SLC25A24 | 694803 |
| Solute carrier family 25 (mitochondrial carrier; phosphate carrier), member 25               | SLC25A25 | 698216 |
| Solute carrier family 25 (mitochondrial carrier; phosphate carrier),                         | SLC25A3  | 693780 |

|                                                                                          |          |        |
|------------------------------------------------------------------------------------------|----------|--------|
| member 3                                                                                 |          |        |
| Solute carrier family 25 (mitochondrial iron transporter), member 37                     | SLC25A37 | 710518 |
| Solute carrier family 25 (pyrimidine nucleotide carrier), member 33                      | SLC25A33 | 722285 |
| Solute carrier family 25 (S-adenosylmethionine carrier), member 26                       | SLC25A26 | 697960 |
| Solute carrier family 25 member 41                                                       | SLC25A41 | 702790 |
| Solute carrier family 25 member 46                                                       | SLC25A46 | 705968 |
| Solute carrier family 25, member 44                                                      | SLC25A44 | 719424 |
| Solute carrier family 26 (anion exchanger), member 8                                     | SLC26A8  | 719049 |
| Solute carrier family 28 (concentrative nucleoside transporter), member 3                | SLC28A3  | 709560 |
| Solute carrier family 30 (zinc transporter), member 1                                    | SLC30A1  | 711624 |
| Solute carrier family 30 (zinc transporter), member 5                                    | SLC30A5  | 699371 |
| Solute carrier family 35 (adenosine 3'-phospho 5'-phosphosulfate transporter), member B3 | SLC35B3  | 698416 |
| Solute carrier family 35 (UDP-galactose transporter), member A2                          | SLC35A2  | 711587 |
| Solute carrier family 35 (UDP-glca/UDP-galnac transporter), member D1                    | SLC35D1  | 700175 |
| Solute carrier family 35 member B1                                                       | SLC35B1  | 699953 |
| Solute carrier family 35 member G1                                                       | SLC35G1  | 700750 |
| Solute carrier family 38 member 1                                                        | SLC38A1  | 702135 |
| Solute carrier family 38 member 11                                                       | SLC38A11 | 703062 |
| Solute carrier family 38 member 6                                                        | SLC38A6  | 704017 |
| Solute carrier family 39 (zinc transporter), member 10                                   | SLC39A10 | 696669 |
| Solute carrier family 39 (zinc transporter), member 13                                   | SLC39A13 | 713420 |
| Solute carrier family 39 (zinc transporter), member 2                                    | SLC39A2  | 705112 |
| Solute carrier family 39 (zinc transporter), member 8                                    | SLC39A8  | 710142 |
| Solute carrier family 39, member 9                                                       | SLC39A9  | 712430 |
| Solute carrier family 4 (anion exchanger), member 1, adaptor protein                     | SLC4A1AP | 701783 |
| Solute carrier family 4 (anion exchanger), member 2                                      | SLC4A2   | 713966 |
| Solute carrier family 4, sodium bicarbonate cotransporter, member 7                      | SLC4A7   | 701925 |
| Solute carrier family 4, sodium borate transporter, member 11                            | SLC4A11  | 718393 |
| Solute carrier family 41 member 3                                                        | SLC41A3  | 716921 |
| Solute carrier family 44 member 3                                                        | SLC44A3  | 714768 |
| Solute carrier family 44 member 4                                                        | SLC44A4  | 715779 |
| Solute carrier family 45 member 3                                                        | SLC45A3  | 697420 |
| Solute carrier family 5 (sodium/choline cotransporter), member 7                         | SLC5A7   | 714093 |
| Solute carrier family 5 (sodium/inositol cotransporter), member 11                       | SLC5A11  | 701816 |
| Solute carrier family 5 (sodium/multivitamin and iodide co transporter), member 6        | SLC5A6   | 699074 |
| Solute carrier family 51 alpha subunit                                                   | SLC51A   | 711340 |
| Solute carrier family 52 (riboflavin transporter), member 1                              | SLC52A1  | 711253 |
| Solute carrier family 6 (neurotransmitter transporter), member 11                        | SLC6A11  | 696741 |



|                                                                                               |          |        |
|-----------------------------------------------------------------------------------------------|----------|--------|
| Solute carrier family 6 (neurotransmitter transporter), member 8                              | SLC6A8   | 698307 |
| Solute carrier family 7 (amino acid transporter light chain, bo,+ system), member 9           | SLC7A9   | 703081 |
| Solute carrier family 7 (amino acid transporter light chain, L system), member 8              | SLC7A8   | 713511 |
| Solute carrier family 7 (anionic amino acid transporter), member 13                           | SLC7A13  | 693964 |
| Solute carrier family 7 (cationic amino acid transporter, y+ system), member 3                | SLC7A3   | 696288 |
| Solute carrier family 9, subfamily A (NHE3, cation proton antiporter 3), member 3 regulator 1 | SLC9A3R1 | 703933 |
| Solute carrier family 9, subfamily A (NHE3, cation proton antiporter 3), member 3 regulator 2 | SLC9A3R2 | 694658 |
| Solute carrier family 9, subfamily A (NHE9, cation proton antiporter 9), member 9             | SLC9A9   | 713935 |
| Solute carrier organic anion transporter family member 1B1                                    | SLCO1B1  | 705308 |
| Solute carrier organic anion transporter family member 2B1                                    | SLCO2B1  | 694829 |
| SON DNA binding protein                                                                       | SON      | 704712 |
| Sorting nexin 1                                                                               | SNX1     | 706544 |
| Sorting nexin 10                                                                              | SNX10    | 701684 |
| Sorting nexin 11                                                                              | SNX11    | 696913 |
| Sorting nexin 13                                                                              | SNX13    | 714019 |
| Sorting nexin 14                                                                              | SNX14    | 696632 |
| Sorting nexin 17                                                                              | SNX17    | 701614 |
| Sorting nexin 24                                                                              | SNX24    | 700621 |
| Sorting nexin 3                                                                               | SNX3     | 700989 |
| Sorting nexin 32                                                                              | SNX32    | 721888 |
| Sorting nexin 33                                                                              | SNX33    | 706309 |
| SOS Ras/Rho guanine nucleotide exchange factor 2                                              | SOS2     | 705601 |
| SP110 nuclear body protein                                                                    | SP110    | 714244 |
| Sp2 transcription factor                                                                      | SP2      | 694834 |
| Sp3 transcription factor                                                                      | SP3      | 699901 |
| Sp5 transcription factor                                                                      | SP5      | 693989 |
| SPARC like 1                                                                                  | SPARCL1  | 701468 |
| Spastic paraplegia 11 (autosomal recessive)                                                   | SPG11    | 712221 |
| Spastic paraplegia 21 (autosomal recessive, Mast syndrome)                                    | SPG21    | 712815 |
| Speckle type POZ protein like                                                                 | SPOPL    | 704203 |
| Spectrin, beta, non-erythrocytic 1                                                            | SPTBN1   | 716794 |
| Spen family transcriptional repressor                                                         | SPEN     | 696205 |
| Sperm acrosome associated 1                                                                   | SPACA1   | 699611 |
| Sperm acrosome associated 4                                                                   | SPACA4   | 718177 |
| Sperm acrosome associated 5                                                                   | SPACA5   | 708435 |
| Sperm acrosome associated 7                                                                   | SPACA7   | 695869 |
| Sperm antigen with calponin homology and coiled-coil domains 1-like                           | SPECC1L  | 707641 |
| Sperm associated antigen 11B                                                                  | SPAG11B  | 641436 |
| Sperm associated antigen 5                                                                    | SPAG5    | 709400 |
| Sperm associated antigen 9                                                                    | SPAG9    | 707613 |

|                                                                                                                |            |           |
|----------------------------------------------------------------------------------------------------------------|------------|-----------|
| Sperm flagellar 1                                                                                              | SPEF1      | 717547    |
| Spermatid perinuclear RNA binding protein                                                                      | STRBP      | 695402    |
| Spermatogenesis associated 17                                                                                  | SPATA17    | 707859    |
| Spermatogenesis associated 2-like                                                                              | SPATA2L    | 699974    |
| Spermatogenesis associated 5-like 1                                                                            | SPATA5L1   | 713376    |
| Spermatogenesis associated 7                                                                                   | SPATA7     | 693836    |
| Spermatogenesis associated, serine rich 2 like                                                                 | SPATS2L    | 699458    |
| Spermatogenesis associated, serine-rich 1                                                                      | SPATS1     | 703218    |
| Spermidine/spermine N1-acetyltransferase 1                                                                     | SAT1       | 697884    |
| Spermine synthase                                                                                              | SMS        | 698179    |
| S-phase cyclin A-associated protein in the ER                                                                  | SCAPER     | 708022    |
| S-phase kinase-associated protein 2, E3 ubiquitin protein ligase                                               | SKP2       | 700617    |
| Sphingomyelin phosphodiesterase 2                                                                              | SMPD2      | 698865    |
| Sphingomyelin phosphodiesterase acid-like 3A                                                                   | SMPDL3A    | 713696    |
| Sphingomyelin synthase 1                                                                                       | SGMS1      | 704027    |
| Spinster homolog 1 (Drosophila)                                                                                | SPNS1      | 704769    |
| Spla/ryanodine receptor domain and SOCS box containing 4                                                       | SPSB4      | 715278    |
| Splicing factor 3a subunit 2                                                                                   | SF3A2      | 721469    |
| Splicing factor 3b subunit 5                                                                                   | SF3B5      | 699863    |
| Splicing factor 3b subunit 6                                                                                   | SF3B6      | 704090    |
| Splicing factor 3b, subunit 1, 155kda                                                                          | SF3B1      | 697773    |
| Splicing factor 3b, subunit 4, 49kda                                                                           | SF3B4      | 705655    |
| Splicing factor, suppressor of white-apricot family                                                            | SFSWAP     | 709551    |
| Split hand/foot malformation (ectrodactyly) type 1                                                             | SHFM1      | 698349    |
| Spondin 1, extracellular matrix protein                                                                        | SPON1      | 699833    |
| Spondin 2, extracellular matrix protein                                                                        | SPON2      | 702450    |
| SPRY domain containing 4                                                                                       | SPRYD4     | 713037    |
| SPT3 homolog, SAGA and STAGA complex component                                                                 | SUPT3H     | 703447    |
| SPT4 homolog, DSIF elongation factor subunit                                                                   | SUPT4H1    | 710214    |
| Squamous cell carcinoma antigen recognized by T-cells 3                                                        | SART3      | 705552    |
| Src-related kinase lacking C-terminal regulatory tyrosine and N-terminal myristylation sites                   | SRMS       | 719587    |
| SRP receptor alpha subunit                                                                                     | SRPRA      | 714215    |
| SR-related CTD-associated factor 11                                                                            | SCAF11     | 701894    |
| SRSF protein kinase 1                                                                                          | SRPK1      | 719039    |
| SRSF protein kinase 3                                                                                          | SRPK3      | 100429808 |
| SRY-box 11                                                                                                     | SOX11      | 707983    |
| SRY-box 13                                                                                                     | SOX13      | 700802    |
| SRY-box 3                                                                                                      | SOX3       | 696412    |
| SRY-box 7                                                                                                      | SOX7       | 697999    |
| SRY-box 9                                                                                                      | SOX9       | 574208    |
| ST3 beta-galactoside alpha-2,3-sialyltransferase 1                                                             | ST3GAL1    | 698004    |
| ST3 beta-galactoside alpha-2,3-sialyltransferase 4                                                             | ST3GAL4    | 717792    |
| ST6 (alpha-N-acetyl-neuraminyl-2,3-beta-galactosyl-1,3)-N-acetyl galactosaminide alpha-2,6-sialyltransferase 3 | ST6GALNAC3 | 709779    |
| STAM binding protein                                                                                           | STAMBP     | 714562    |
| STAM binding protein like 1                                                                                    | STAMBPL1   | 694629    |
| Staphylococcal nuclease and tudor domain containing 1                                                          | SND1       | 699542    |

|                                                                               |          |        |
|-------------------------------------------------------------------------------|----------|--------|
| Star related lipid transfer domain containing 3                               | STARD3   | 697212 |
| Star related lipid transfer domain containing 5                               | STARD5   | 713308 |
| STARD3 N-terminal like                                                        | STARD3NL | 705212 |
| Stathmin 1                                                                    | STMN1    | 719733 |
| Stathmin 3                                                                    | STMN3    | 719538 |
| Stathmin 4                                                                    | STMN4    | 712651 |
| Staufen double-stranded RNA binding protein 1                                 | STAU1    | 704197 |
| STE20 like kinase                                                             | SLK      | 715086 |
| STE20-related kinase adaptor alpha                                            | STRADA   | 717927 |
| Stereocilin                                                                   | STRC     | 677720 |
| Sterile alpha motif domain containing 13                                      | SAMD13   | 713946 |
| Sterol O-acyltransferase 1                                                    | SOAT1    | 716989 |
| Sterol-C5-desaturase                                                          | SC5D     | 706827 |
| STIP1 homology and U-box containing protein 1, E3 ubiquitin<br>protein ligase | STUB1    | 697105 |
| Stomatin like 2                                                               | STOML2   | 698458 |
| Storkhead box 2                                                               | STOX2    | 693692 |
| Stratifin                                                                     | SFN      | 715055 |
| Strawberry notch homolog 1 (Drosophila)                                       | SBNO1    | 709260 |
| Strawberry notch homolog 2 (Drosophila)                                       | SBNO2    | 721186 |
| Stress induced phosphoprotein 1                                               | STIP1    | 717926 |
| Striatin                                                                      | STRN     | 708491 |
| Striatin interacting protein 1                                                | STRIP1   | 700799 |
| Stromal cell derived factor 4                                                 | SDF4     | 699804 |
| Stromal cell-derived factor 2                                                 | SDF2     | 716189 |
| Structural maintenance of chromosomes 1B                                      | SMC1B    | 713486 |
| Structural maintenance of chromosomes 2                                       | SMC2     | 713359 |
| Structural maintenance of chromosomes 4                                       | SMC4     | 702615 |
| Structure specific recognition protein 1                                      | SSRP1    | 706614 |
| STT3A, subunit of the oligosaccharyltransferase complex<br>(catalytic)        | STT3A    | 717056 |
| STT3B, subunit of the oligosaccharyltransferase complex<br>(catalytic)        | STT3B    | 703434 |
| SUB1 homolog, transcriptional regulator                                       | SUB1     | 701045 |
| Succinate dehydrogenase complex assembly factor 2                             | SDHAF2   | 693401 |
| Succinate dehydrogenase complex subunit A, flavoprotein (Fp)                  | SDHA     | 708018 |
| Succinate dehydrogenase complex subunit B, iron sulfur (Ip)                   | SDHB     | 699810 |
| Succinate dehydrogenase complex, subunit D, integral membrane<br>protein      | SDHD     | 711326 |
| Succinate-coa ligase, GDP-forming, beta subunit                               | SUCLG2   | 697454 |
| Sulfatase 2                                                                   | SULF2    | 715937 |
| Sulfiredoxin 1                                                                | SRXN1    | 714997 |
| SUMO1/sentrin specific peptidase 5                                            | SEN5     | 710223 |
| SUMO1/sentrin specific peptidase 6                                            | SEN6     | 716554 |
| SUMO1/sentrin specific peptidase 7                                            | SEN7     | 701453 |
| SUMO1/sentrin/SMT3 specific peptidase 3                                       | SEN3     | 715884 |
| SUMO-interacting motifs containing 1                                          | SIMC1    | 701880 |
| SUN domain containing ossification factor                                     | SUCO     | 705776 |

|                                                                                                   |          |           |
|---------------------------------------------------------------------------------------------------|----------|-----------|
| Superkiller viralicidic activity 2-like 2 (S. Cerevisiae)                                         | SKIV2L2  | 706419    |
| Superoxide dismutase 1, soluble                                                                   | SOD1     | 574096    |
| Supervillin                                                                                       | SVIL     | 695267    |
| Suppression of tumorigenicity 13 (colon carcinoma) (Hsp70 interacting protein)                    | ST13     | 705664    |
| Suppression of tumorigenicity 7 like                                                              | ST7L     | 705541    |
| Suppressor of cytokine signaling 1                                                                | SOCS1    | 711180    |
| Suppressor of cytokine signaling 2                                                                | SOCS2    | 715772    |
| Suppressor of cytokine signaling 4                                                                | SOCS4    | 696146    |
| Suppressor of cytokine signaling 6                                                                | SOCS6    | 704108    |
| Suppressor of fused homolog (Drosophila)                                                          | SUFU     | 713576    |
| Suppressor of IKBKE 1                                                                             | SIKE1    | 708999    |
| Suppressor of variegation 3-9 homolog 1                                                           | SUV39H1  | 711040    |
| Surfactant associated 2                                                                           | SFTA2    | 714397    |
| Surfactant protein D                                                                              | SFTPD    | 678657    |
| Surfeit 2                                                                                         | SURF2    | 100430368 |
| Surfeit 4                                                                                         | SURF4    | 100429960 |
| SURP and G-patch domain containing 1                                                              | SUGP1    | 719772    |
| SURP and G-patch domain containing 2                                                              | SUGP2    | 719666    |
| Survival motor neuron domain containing 1                                                         | SMNDC1   | 694761    |
| Survival of motor neuron 1, telomeric                                                             | SMN1     | 677703    |
| Sushi domain containing 4                                                                         | SUSD4    | 703741    |
| Sushi-repeat containing protein, X-linked                                                         | SRPX     | 697145    |
| SUV3-like helicase                                                                                | SUPV3L1  | 712081    |
| SWI/SNF related, matrix associated, actin dependent regulator of chromatin, subfamily a, member 2 | SMARCA2  | 696973    |
| SWI/SNF related, matrix associated, actin dependent regulator of chromatin, subfamily a, member 5 | SMARCA5  | 700614    |
| SWI/SNF related, matrix associated, actin dependent regulator of chromatin, subfamily a-like 1    | SMARCAL1 | 695741    |
| SWI/SNF related, matrix associated, actin dependent regulator of chromatin, subfamily b, member 1 | SMARCB1  | 699190    |
| SWI/SNF related, matrix associated, actin dependent regulator of chromatin, subfamily d, member 3 | SMARCD3  | 715080    |
| SWI/SNF related, matrix associated, actin dependent regulator of chromatin, subfamily e, member 1 | SMARCE1  | 701310    |
| SWT1, RNA endoribonuclease homolog                                                                | SWT1     | 714083    |
| Symplekin                                                                                         | SYMPK    | 722436    |
| Synapsin II                                                                                       | SYN2     | 695412    |
| Synaptogyrin 1                                                                                    | SYNGR1   | 100427480 |
| Synaptogyrin 4                                                                                    | SYNGR4   | 717913    |
| Synaptojanin 2 binding protein                                                                    | SYNJ2BP  | 713312    |
| Synaptophysin-like 1                                                                              | SYPL1    | 698350    |
| Synaptosome associated protein 29kda                                                              | SNAP29   | 696708    |
| Synaptosome associated protein 47kda                                                              | SNAP47   | 696700    |
| Synaptotagmin 1                                                                                   | SYT1     | 695390    |
| Synaptotagmin like 1                                                                              | SYTL1    | 715833    |
| Synaptotagmin like 2                                                                              | SYTL2    | 703187    |

|                                                                                             |          |        |
|---------------------------------------------------------------------------------------------|----------|--------|
| Synaptotagmin VII                                                                           | SYT7     | 722368 |
| Syndecan 1                                                                                  | SDC1     | 701544 |
| Syndecan binding protein                                                                    | SDCBP    | 698381 |
| Syndecan binding protein 2                                                                  | SDCBP2   | 715602 |
| Synemin                                                                                     | SYNM     | 717194 |
| Synergisin, gamma                                                                           | SYNRG    | 717750 |
| Synovial sarcoma translocation gene on chromosome 18-like 2                                 | SS18L2   | 716387 |
| Syntaxin 12                                                                                 | STX12    | 716455 |
| Syntaxin 1B                                                                                 | STX1B    | 714251 |
| Syntaxin binding protein 3                                                                  | STXBP3   | 699144 |
| Syntaxin binding protein 6 (amisyn)                                                         | STXBP6   | 715357 |
| Synuclein beta                                                                              | SNCB     | 697484 |
| Tafazzin                                                                                    | TAZ      | 574297 |
| TAM41, mitochondrial translocator assembly and maintenance protein, homolog (S. Cerevisiae) | C3orf31  | 695998 |
| Tankyrase, TRF1-interacting ankyrin-related ADP-ribose polymerase                           | TNKS     | 699004 |
| Tankyrase, TRF1-interacting ankyrin-related ADP-ribose polymerase 2                         | TNKS2    | 698050 |
| TAO kinase 2                                                                                | TAOK2    | 707777 |
| TAR (HIV-1) RNA binding protein 1                                                           | TARBP1   | 712397 |
| TAR (HIV-1) RNA binding protein 2                                                           | TARBP2   | 703294 |
| Target of myb1 like 1 membrane trafficking protein                                          | TOM1L1   | 710262 |
| Taspase 1                                                                                   | TASP1    | 694028 |
| Taste 1 receptor member 1                                                                   | TAS1R1   | 720987 |
| TATA-box binding protein associated factor 10                                               | TAF10    | 710022 |
| TATA-box binding protein associated factor 12                                               | TAF12    | 717135 |
| TATA-box binding protein associated factor 5                                                | TAF5     | 714558 |
| TATA-box binding protein associated factor 5 like                                           | TAF5L    | 693770 |
| TATA-box binding protein associated factor 6 like                                           | TAF6L    | 722233 |
| TATA-box binding protein associated factor 9                                                | TAF9     | 700239 |
| TATA-box binding protein associated factor, RNA polymerase I, D                             | TAF1D    | 696602 |
| Tatd dnase domain containing 1                                                              | TATDN1   | 706095 |
| Tax1 (human T-cell leukemia virus type I) binding protein 1                                 | TAX1BP1  | 698103 |
| TBC1 domain family member 15                                                                | TBC1D15  | 718743 |
| TBC1 domain family member 25                                                                | TBC1D25  | 710596 |
| TBC1 domain family member 9                                                                 | TBC1D9   | 702230 |
| T-box 2                                                                                     | TBX2     | 716277 |
| T-box 21                                                                                    | TBX21    | 694044 |
| T-box 3                                                                                     | TBX3     | 713740 |
| TCDD-inducible poly(ADP-ribose) polymerase                                                  | TIPARP   | 706180 |
| T-cell acute lymphocytic leukemia 2                                                         | TAL2     | 712138 |
| T-cell leukemia/lymphoma 1B                                                                 | TCL1B    | 703241 |
| TCF3 (E2A) fusion partner (in childhood Leukemia)                                           | TFPT     | 720296 |
| T-complex-associated-testis-expressed 3                                                     | TCTE3    | 695431 |
| Tctex1 domain containing 2                                                                  | TCTEX1D2 | 711098 |
| TEA domain family member 4                                                                  | TEAD4    | 721772 |

|                                                          |          |        |
|----------------------------------------------------------|----------|--------|
| Teashirt zinc finger homeobox 1                          | TSHZ1    | 703018 |
| Tectonic family member 3                                 | TCTN3    | 703844 |
| Tektin 1                                                 | TEKT1    | 713555 |
| Tektin 3                                                 | TEKT3    | 693793 |
| TELO2 interacting protein 1                              | TTI1     | 699930 |
| Telomeric repeat binding factor 2, interacting protein   | TERF2IP  | 712149 |
| Tensin 2                                                 | TNS2     | 700813 |
| Tensin 4                                                 | TNS4     | 701075 |
| TERF1 (TRF1)-interacting nuclear factor 2                | TINF2    | 715812 |
| Testin LIM domain protein                                | TES      | 706879 |
| Testis expressed 10                                      | TEX10    | 714536 |
| Testis expressed 26                                      | TEX26    | 713363 |
| Testis expressed 28                                      | TEX28    | 699141 |
| Testis expressed 30                                      | TEX30    | 701917 |
| Testis expressed 40                                      | TEX40    | 717642 |
| Testis specific 10 interacting protein                   | TSGA10IP | 715217 |
| Testis-specific kinase 1                                 | TESK1    | 697206 |
| Tetraspanin 15                                           | TSPAN15  | 711675 |
| Tetraspanin 3                                            | TSPAN3   | 708428 |
| Tetraspanin 5                                            | TSPAN5   | 706537 |
| Tetraspanin 7                                            | TSPAN7   | 698011 |
| Tetraspanin 8                                            | TSPAN8   | 718622 |
| Tetratricopeptide repeat domain 16                       | TTC16    | 706784 |
| Tetratricopeptide repeat domain 21A                      | TTC21A   | 694904 |
| Tetratricopeptide repeat domain 26                       | TTC26    | 715688 |
| Tetratricopeptide repeat domain 27                       | TTC27    | 707021 |
| Tetratricopeptide repeat domain 31                       | TTC31    | 708810 |
| Tetratricopeptide repeat domain 32                       | TTC32    | 700947 |
| Tetratricopeptide repeat domain 39C                      | TTC39C   | 701560 |
| Tetratricopeptide repeat domain 7A                       | TTC7A    | 715122 |
| Tetratricopeptide repeat domain 7B                       | TTC7B    | 696029 |
| Tetratricopeptide repeat domain 9C                       | TTC9C    | 718583 |
| TGF-beta activated kinase 1/MAP3K7 binding protein 1     | TAB1     | 703409 |
| TGF-beta activated kinase 1/MAP3K7 binding protein 2     | TAB2     | 696875 |
| THAP domain containing 10                                | THAP10   | 696770 |
| THAP domain containing 4                                 | THAP4    | 701543 |
| THAP domain containing 7                                 | THAP7    | 696208 |
| Thioredoxin                                              | TXN      | 712587 |
| Thioredoxin domain containing 11                         | TXNDC11  | 711826 |
| Thioredoxin domain containing 12 (endoplasmic reticulum) | TXNDC12  | 712891 |
| Thioredoxin domain containing 9                          | TXNDC9   | 709303 |
| Thioredoxin like 1                                       | TXNL1    | 695194 |
| Thioredoxin like 4A                                      | TXNL4A   | 698969 |
| Thioredoxin reductase 1                                  | TXNRD1   | 701062 |
| Thioredoxin reductase 2                                  | TXNRD2   | 712475 |
| Thiosulfate sulfurtransferase (rhodanese)                | TST      | 698021 |
| THO complex 1                                            | THOC1    | 697954 |
| THO complex 6                                            | THOC6    | 700217 |

|                                                                            |          |           |
|----------------------------------------------------------------------------|----------|-----------|
| Thrombospondin 3                                                           | THBS3    | 717572    |
| THUMP domain containing 2                                                  | THUMPD2  | 712045    |
| Thymocyte nuclear protein 1                                                | THYN1    | 700413    |
| Thymocyte selection associated high mobility group box                     | TOX      | 698759    |
| Thymopoietin                                                               | TMPO     | 693387    |
| Thymosin beta 10                                                           | TMSB10   | 694305    |
| Thyroid adenoma associated                                                 | THADA    | 716361    |
| Thyroid hormone receptor associated protein 3                              | THRAP3   | 713033    |
| Thyroid hormone receptor interactor 11                                     | TRIP11   | 697489    |
| Thyroid hormone receptor interactor 12                                     | TRIP12   | 710560    |
| Thyroid hormone receptor interactor 13                                     | TRIP13   | 709328    |
| Thyroid hormone receptor interactor 4                                      | TRIP4    | 707263    |
| Thyroid hormone responsive                                                 | THRSP    | 699701    |
| TIA1 cytotoxic granule-associated RNA binding protein                      | TIA1     | 702366    |
| TIMP metalloproteinase inhibitor 1                                         | TIMP1    | 574348    |
| Titin-cap                                                                  | TCAP     | 697327    |
| TM2 domain containing 2                                                    | TM2D2    | 701007    |
| TMEM9 domain family member B                                               | TMEM9B   | 708447    |
| TNF receptor associated factor 2                                           | TRAF2    | 708391    |
| TNF receptor associated factor 6                                           | TRAF6    | 716907    |
| TNF receptor associated factor 7                                           | TRAF7    | 695415    |
| TNF receptor-associated protein 1                                          | TRAP1    | 706234    |
| Tocopherol (alpha) transfer protein-like                                   | TTPAL    | 712620    |
| Toll-like receptor 9                                                       | TLR9     | 574395    |
| Toll-like receptor adaptor molecule 1                                      | TICAM1   | 574294    |
| Toll-like receptor adaptor molecule 2                                      | TICAM2   | 100426352 |
| Topoisomerase (DNA) II alpha                                               | TOP2A    | 700707    |
| Topoisomerase (DNA) II beta                                                | TOP2B    | 677709    |
| Topoisomerase (DNA) II binding protein 1                                   | TOPBP1   | 719054    |
| Topoisomerase (DNA) III beta                                               | TOP3B    | 698317    |
| Topoisomerase I binding, arginine/serine-rich, E3 ubiquitin protein ligase | TOPORS   | 703930    |
| Torsin family 1, member A (torsin A)                                       | TOR1A    | 722520    |
| Torsin family 2, member A                                                  | TOR2A    | 700203    |
| TP53 induced glycolysis regulatory phosphatase                             | TIGAR    | 721886    |
| TPX2, microtubule-associated                                               | TPX2     | 712961    |
| TRAF family member associated NFKB activator                               | TANK     | 700942    |
| TRAF2 and NCK interacting kinase                                           | TNIK     | 695414    |
| TRAF3 interacting protein 2                                                | TRAF3IP2 | 697530    |
| Trafficking protein particle complex 11                                    | TRAPPC11 | 702066    |
| Trafficking protein, kinesin binding 2                                     | TRAK2    | 701779    |
| TRAF-type zinc finger domain containing 1                                  | TRAFD1   | 711635    |
| Trans-2,3-enoyl-coa reductase                                              | TECR     | 718928    |
| Transaldolase 1                                                            | TALDO1   | 720828    |
| Transcription elongation factor A (SII), 2                                 | TCEA2    | 694026    |
| Transcription elongation factor A (SII)-like 4                             | TCEAL4   | 696453    |
| Transcription elongation factor A (SII)-like 7                             | TCEAL7   | 695831    |
| Transcription elongation factor A (SII)-like 8                             | TCEAL8   | 695496    |

|                                                                               |         |           |
|-------------------------------------------------------------------------------|---------|-----------|
| Transcription elongation factor B (SIII), polypeptide 1 (15kda, elongin C)    | TCEB1   | 698922    |
| Transcription factor 4                                                        | TCF4    | 695814    |
| Transcription factor A, mitochondrial                                         | TFAM    | 701368    |
| Transcription factor AP-2 alpha (activating enhancer binding protein 2 alpha) | TFAP2A  | 700663    |
| Transcription factor B1, mitochondrial                                        | TFB1M   | 701830    |
| Transcriptional adaptor 3                                                     | TADA3   | 700090    |
| Transducer of ERBB2, 1                                                        | TOB1    | 706873    |
| Transducin (beta)-like 1 X-linked receptor 1                                  | TBL1XR1 | 712740    |
| Transducin (beta)-like 3                                                      | TBL3    | 693864    |
| Transducin like enhancer of split 1                                           | TLE1    | 707336    |
| Transferrin receptor                                                          | TFRC    | 711568    |
| Transformer 2 alpha homolog (Drosophila)                                      | TRA2A   | 574247    |
| Transformer 2 beta homolog (Drosophila)                                       | TRA2B   | 574337    |
| Transforming growth factor beta 1 induced transcript 1                        | TGFB1I1 | 714172    |
| Transforming growth factor beta 2                                             | TGFB2   | 707540    |
| Transforming growth factor beta receptor II                                   | TGFBR2  | 703088    |
| Transforming growth factor beta receptor III                                  | TGFBR3  | 705053    |
| Transforming growth factor, beta receptor 1                                   | TGFBR1  | 714952    |
| Transforming, acidic coiled-coil containing protein 2                         | TACC2   | 705497    |
| Transforming, acidic coiled-coil containing protein 3                         | TACC3   | 712898    |
| Transgelin 2                                                                  | TAGLN2  | 719527    |
| Transglutaminase 2                                                            | TGM2    | 706777    |
| Transient receptor potential cation channel, subfamily M, member 5            | TRPM5   | 705070    |
| Transient receptor potential cation channel, subfamily V, member 4            | TRPV4   | 709605    |
| Translational activator of mitochondrially encoded cytochrome c oxidase I     | TACO1   | 717828    |
| Translocase of inner mitochondrial membrane 17 homolog A (yeast)              | TIMM17A | 707001    |
| Translocase of inner mitochondrial membrane 17 homolog B (yeast)              | TIMM17B | 714895    |
| Translocase of inner mitochondrial membrane 44 homolog (yeast)                | TIMM44  | 709800    |
| Translocase of inner mitochondrial membrane 8 homolog B (yeast)               | TIMM8B  | 711249    |
| Translocase of inner mitochondrial membrane domain containing 1               | TIMMDC1 | 712414    |
| Translocase of outer mitochondrial membrane 6 homolog (yeast)                 | TOMM6   | 100423264 |
| Translocase of outer mitochondrial membrane 70 homolog A (S. Cerevisiae)      | TOMM70A | 700347    |
| Translocated promoter region, nuclear basket protein                          | TPR     | 713910    |
| Translocator protein                                                          | TSPO    | 711717    |
| Transmembrane 4 L six family member 18                                        | TM4SF18 | 712063    |
| Transmembrane 4 L six family member 5                                         | TM4SF5  | 709844    |



|                                                                   |          |           |
|-------------------------------------------------------------------|----------|-----------|
| Transmembrane 6 superfamily member 2                              | TM6SF2   | 719756    |
| Transmembrane 7 superfamily member 3                              | TM7SF3   | 710602    |
| Transmembrane 9 superfamily member 1                              | TM9SF1   | 715472    |
| Transmembrane 9 superfamily protein member 4                      | TM9SF4   | 712260    |
| Transmembrane and coiled-coil domain family 3                     | TMCC3    | 716185    |
| Transmembrane and ubiquitin-like domain containing 1              | TMUB1    | 714606    |
| Transmembrane and ubiquitin-like domain containing 2              | TMUB2    | 714541    |
| Transmembrane p24 trafficking protein 1                           | TMED1    | 713618    |
| Transmembrane p24 trafficking protein 3                           | TMED3    | 711993    |
| Transmembrane p24 trafficking protein 4                           | TMED4    | 699105    |
| Transmembrane p24 trafficking protein 7                           | TMED7    | 100533192 |
| Transmembrane phosphoinositide 3-phosphatase and tensin homolog 2 | TPTE2    | 704870    |
| Transmembrane protease, serine 13                                 | TMPRSS13 | 698586    |
| Transmembrane protein 104                                         | TMEM104  | 698592    |
| Transmembrane protein 115                                         | TMEM115  | 702164    |
| Transmembrane protein 121                                         | TMEM121  | 700005    |
| Transmembrane protein 125                                         | TMEM125  | 699920    |
| Transmembrane protein 126A                                        | TMEM126A | 702831    |
| Transmembrane protein 126B                                        | TMEM126B | 702719    |
| Transmembrane protein 132A                                        | TMEM132A | 695291    |
| Transmembrane protein 135                                         | TMEM135  | 704963    |
| Transmembrane protein 138                                         | TMEM138  | 693905    |
| Transmembrane protein 141                                         | TMEM141  | 721687    |
| Transmembrane protein 147                                         | TMEM147  | 709568    |
| Transmembrane protein 14A                                         | TMEM14A  | 708829    |
| Transmembrane protein 14C                                         | TMEM14C  | 697976    |
| Transmembrane protein 150A                                        | TMEM150A | 696101    |
| Transmembrane protein 160                                         | TMEM160  | 716996    |
| Transmembrane protein 164                                         | TMEM164  | 705380    |
| Transmembrane protein 165                                         | TMEM165  | 696262    |
| Transmembrane protein 168                                         | TMEM168  | 702972    |
| Transmembrane protein 171                                         | TMEM171  | 702863    |
| Transmembrane protein 177                                         | TMEM177  | 695399    |
| Transmembrane protein 186                                         | TMEM186  | 714067    |
| Transmembrane protein 187                                         | TMEM187  | 698397    |
| Transmembrane protein 19                                          | TMEM19   | 718700    |
| Transmembrane protein 192                                         | TMEM192  | 708459    |
| Transmembrane protein 204                                         | TMEM204  | 701926    |
| Transmembrane protein 208                                         | TMEM208  | 697228    |
| Transmembrane protein 216                                         | TMEM216  | 693655    |
| Transmembrane protein 218                                         | TMEM218  | 100430360 |
| Transmembrane protein 237                                         | TMEM237  | 702262    |
| Transmembrane protein 243                                         | TMEM243  | 706405    |
| Transmembrane protein 245                                         | TMEM245  | 710299    |
| Transmembrane protein 246                                         | TMEM246  | 713682    |
| Transmembrane protein 248                                         | TMEM248  | 695654    |
| Transmembrane protein 254                                         | TMEM254  | 701130    |

|                                                                        |         |           |
|------------------------------------------------------------------------|---------|-----------|
| Transmembrane protein 256                                              | TMEM256 | 715274    |
| Transmembrane protein 261                                              | TMEM261 | 716818    |
| Transmembrane protein 27                                               | TMEM27  | 712928    |
| Transmembrane protein 30A                                              | TMEM30A | 717907    |
| Transmembrane protein 31                                               | TMEM31  | 100429776 |
| Transmembrane protein 33                                               | TMEM33  | 702063    |
| Transmembrane protein 38B                                              | TMEM38B | 715679    |
| Transmembrane protein 39B                                              | TMEM39B | 706700    |
| Transmembrane protein 42                                               | TMEM42  | 714654    |
| Transmembrane protein 45A                                              | TMEM45A | 700594    |
| Transmembrane protein 45B                                              | TMEM45B | 718735    |
| Transmembrane protein 5                                                | TMEM5   | 717102    |
| Transmembrane protein 53                                               | TMEM53  | 705023    |
| Transmembrane protein 55A                                              | TMEM55A | 696779    |
| Transmembrane protein 56                                               | TMEM56  | 709729    |
| Transmembrane protein 57                                               | TMEM57  | 654415    |
| Transmembrane protein 59                                               | TMEM59  | 714942    |
| Transmembrane protein 67                                               | TMEM67  | 698631    |
| Transmembrane protein 81                                               | TMEM81  | 699180    |
| Transmembrane protein 94                                               | TMEM94  | 702374    |
| Transmembrane protein with EGF-like and two follistatin-like domains 2 | TMEFF2  | 694555    |
| Transmembrane protein, adipocyte associated 1                          | TPRA1   | 707221    |
| Transporter 1, ATP-binding cassette, sub-family B (MDR/TAP)            | TAP1    | 717726    |
| Transportin 2                                                          | TNPO2   | 717710    |
| Tribbles pseudokinase 2                                                | TRIB2   | 710966    |
| Triggering receptor expressed on myeloid cells like 2                  | TREML2  | 719749    |
| Trinucleotide repeat containing 6A                                     | TNRC6A  | 701680    |
| Triokinase/FMN cyclase                                                 | TKFC    | 694117    |
| Tripartite motif containing 11                                         | TRIM11  | 694150    |
| Tripartite motif containing 22                                         | TRIM22  | 713814    |
| Tripartite motif containing 23                                         | TRIM23  | 696386    |
| Tripartite motif containing 24                                         | TRIM24  | 710229    |
| Tripartite motif containing 27                                         | TRIM27  | 706129    |
| Tripartite motif containing 32                                         | TRIM32  | 702595    |
| Tripartite motif containing 33                                         | TRIM33  | 710600    |
| Tripartite motif containing 34                                         | TRIM34  | 100568288 |
| Tripartite motif containing 36                                         | TRIM36  | 694994    |
| Tripartite motif containing 37                                         | TRIM37  | 710934    |
| Tripartite motif containing 41                                         | TRIM41  | 708426    |
| Tripartite motif containing 46                                         | TRIM46  | 717498    |
| Tripartite motif containing 47                                         | TRIM47  | 704642    |
| Tripartite motif containing 5                                          | TRIM5   | 574288    |
| Tripartite motif containing 8                                          | TRIM8   | 713701    |
| TRK-fused gene                                                         | TFG     | 700972    |
| Trna 5-methylaminomethyl-2-thiouridylate methyltransferase             | TRMU    | 714268    |
| Trna isopentenyltransferase 1                                          | TRIT1   | 716422    |
| Trna methyltransferase 1                                               | TRMT1   | 718227    |

|                                                       |           |           |
|-------------------------------------------------------|-----------|-----------|
| Trna methyltransferase 1 like                         | TRMT1L    | 714319    |
| Trna methyltransferase 11 homolog                     | TRMT11    | 712712    |
| Trna methyltransferase 11-2 homolog (S. Cerevisiae)   | TRMT112   | 717676    |
| Trna methyltransferase 6                              | TRMT6     | 718229    |
| Trna methyltransferase O                              | TRMO      | 715609    |
| Trna phosphotransferase 1                             | TRPT1     | 717911    |
| Trna splicing endonuclease subunit 15                 | TSEN15    | 717481    |
| Trna splicing endonuclease subunit 54                 | TSEN54    | 702604    |
| Tropomodulin 4                                        | TMOD4     | 709732    |
| Tropomyosin 1 (alpha)                                 | TPM1      | 705236    |
| Tropomyosin 2 (beta)                                  | TPM2      | 696604    |
| TRPM8 channel-associated factor 1                     | TCAF1     | 705151    |
| TRPM8 channel-associated factor 2                     | TCAF2     | 707579    |
| Trub pseudouridine (psi) synthase family member 1     | TRUB1     | 699133    |
| Tryptase gamma 1                                      | TPSG1     | 100425752 |
| TSC22 domain family member 1                          | TSC22D1   | 701076    |
| TSC22 domain family member 3                          | TSC22D3   | 702656    |
| TSC22 domain family member 4                          | TSC22D4   | 719183    |
| TSPY-like 4                                           | TSPYL4    | 716137    |
| TSR3, 20S rRNA accumulation, homolog (S. Cerevisiae)  | TSR3      | 677691    |
| TSSK6 activating co-chaperone                         | TSACC     | 719490    |
| Tuberous sclerosis 2                                  | TSC2      | 694965    |
| Tubulin alpha 1a                                      | TUBA1A    | 574194    |
| Tubulin alpha 3c                                      | TUBA3C    | 707215    |
| Tubulin beta 4B class ivb                             | TUBB4B    | 100425864 |
| Tubulin beta class I                                  | TUBB      | 574113    |
| Tubulin folding cofactor C                            | TBCC      | 696997    |
| Tubulin folding cofactor E                            | TBCE      | 711476    |
| Tubulin folding cofactor E-like                       | TBCEL     | 706506    |
| Tubulin gamma complex associated protein 4            | TUBGCP4   | 710327    |
| Tubulin tyrosine ligase like 12                       | TLL12     | 714871    |
| Tubulin, alpha 1b                                     | TUBA1B    | 709643    |
| Tudor domain containing 3                             | TDRD3     | 696228    |
| Tudor domain containing 6                             | TDRD6     | 704453    |
| Tudor domain containing 7                             | TDRD7     | 641450    |
| Tuftelin interacting protein 11                       | TFIP11    | 712691    |
| Tumor necrosis factor (ligand) superfamily, member 12 | TNFSF12   | 100551504 |
| Tumor necrosis factor receptor superfamily member 11b | TNFRSF11B | 701850    |
| Tumor necrosis factor receptor superfamily member 25  | TNFRSF25  | 703744    |
| Tumor necrosis factor receptor superfamily member 4   | TNFRSF4   | 699674    |
| Tumor necrosis factor superfamily member 13           | TNFSF13   | 100551504 |
| Tumor necrosis factor superfamily member 13b          | TNFSF13B  | 693917    |
| Tumor necrosis factor superfamily member 4            | TNFSF4    | 706255    |
| Tumor protein D52-like 1                              | TPD52L1   | 716568    |
| Tumor protein p53                                     | TP53      | 716170    |
| Tumor protein p53 binding protein 1                   | TP53BP1   | 710237    |
| Tumor protein p53 inducible protein 3                 | TP53I3    | 704206    |
| Tumor protein, translationally-controlled 1           | TPT1      | 702155    |

|                                                                               |         |           |
|-------------------------------------------------------------------------------|---------|-----------|
| Tumor suppressing subtransferable candidate 4                                 | TSSC4   | 705185    |
| Tumor suppressor candidate 3                                                  | TUSC3   | 701123    |
| Twist family bhlh transcription factor 1                                      | TWIST1  | 574278    |
| Twist family bhlh transcription factor 2                                      | TWIST2  | 697078    |
| TWIST neighbor                                                                | TWISTNB | 707781    |
| Twisted gastrulation homolog 1 (Drosophila)                                   | TWSG1   | 705804    |
| TYRO3 protein tyrosine kinase                                                 | TYRO3   | 710902    |
| Tyrosine 3-monooxygenase/tryptophan 5-monooxygenase activation protein, beta  | YWHAB   | 717788    |
| Tyrosine 3-monooxygenase/tryptophan 5-monooxygenase activation protein, eta   | YWHAH   | 717016    |
| Tyrosine 3-monooxygenase/tryptophan 5-monooxygenase activation protein, gamma | YWHAG   | 715517    |
| Tyrosine hydroxylase                                                          | TH      | 721137    |
| Tyrosine kinase, non-receptor, 1                                              | TNK1    | 715180    |
| Tyrosine kinase, non-receptor, 2                                              | TNK2    | 711655    |
| Tyrosyl-DNA phosphodiesterase 2                                               | TDP2    | 715162    |
| Tyrosyl-trna synthetase                                                       | YARS    | 709003    |
| U2AF homology motif (UHM) kinase 1                                            | UHMK1   | 720105    |
| Ubiquilin 1                                                                   | UBQLN1  | 713525    |
| Ubiquinol-cytochrome c reductase core protein II                              | UQCRC2  | 697967    |
| Ubiquinol-cytochrome c reductase, 6.4kda subunit                              | UQCR    | 708396    |
| Ubiquinol-cytochrome c reductase, complex III subunit VII, 9.5kda             | UQCRQ   | 708950    |
| Ubiquitin A-52 residue ribosomal protein fusion product 1                     | UBA52   | 720243    |
| Ubiquitin B                                                                   | UBB     | 696110    |
| Ubiquitin conjugating enzyme E2 variant 1                                     | UBE2V1  | 100425552 |
| Ubiquitin conjugating enzyme E2 variant 2                                     | UBE2V2  | 714735    |
| Ubiquitin conjugating enzyme E2A                                              | UBE2A   | 693716    |
| Ubiquitin conjugating enzyme E2D 1                                            | UBE2D1  | 701491    |
| Ubiquitin conjugating enzyme E2D 4 (putative)                                 | UBE2D4  | 707831    |
| Ubiquitin conjugating enzyme E2E 3                                            | UBE2E3  | 704530    |
| Ubiquitin conjugating enzyme E2F (putative)                                   | UBE2F   | 695394    |
| Ubiquitin conjugating enzyme E2I                                              | UBE2I   | 722434    |
| Ubiquitin conjugating enzyme E2O                                              | UBE2O   | 710529    |
| Ubiquitin conjugating enzyme E2S                                              | UBE2S   | 700592    |
| Ubiquitin C-terminal hydrolase L1                                             | UCHL1   | 701579    |
| Ubiquitin C-terminal hydrolase L3                                             | UCHL3   | 697276    |
| Ubiquitin domain containing 2                                                 | UBTD2   | 709455    |
| Ubiquitin family domain containing 1                                          | UBFD1   | 700601    |
| Ubiquitin interaction motif containing 1                                      | UIMC1   | 705412    |
| Ubiquitin like 4A                                                             | UBL4A   | 700643    |
| Ubiquitin like 5                                                              | UBL5    | 711015    |
| Ubiquitin like 7                                                              | UBL7    | 702305    |
| Ubiquitin like domain containing CTD phosphatase 1                            | UBLCP1  | 694476    |
| Ubiquitin protein ligase E3 component n-recognin 7 (putative)                 | UBR7    | 698882    |
| Ubiquitin protein ligase E3B                                                  | UBE3B   | 707324    |
| Ubiquitin related modifier 1                                                  | URM1    | 722618    |

|                                                                    |         |           |
|--------------------------------------------------------------------|---------|-----------|
| Ubiquitin specific peptidase 10                                    | USP10   | 718471    |
| Ubiquitin specific peptidase 11                                    | USP11   | 706555    |
| Ubiquitin specific peptidase 13 (isopeptidase T-3)                 | USP13   | 708624    |
| Ubiquitin specific peptidase 15                                    | USP15   | 716793    |
| Ubiquitin specific peptidase 16                                    | USP16   | 706403    |
| Ubiquitin specific peptidase 20                                    | USP20   | 716505    |
| Ubiquitin specific peptidase 21                                    | USP21   | 719894    |
| Ubiquitin specific peptidase 25                                    | USP25   | 716923    |
| Ubiquitin specific peptidase 3                                     | USP3    | 705973    |
| Ubiquitin specific peptidase 30                                    | USP30   | 706607    |
| Ubiquitin specific peptidase 32                                    | USP32   | 716857    |
| Ubiquitin specific peptidase 38                                    | USP38   | 700235    |
| Ubiquitin specific peptidase 39                                    | USP39   | 696217    |
| Ubiquitin specific peptidase 45                                    | USP45   | 694340    |
| Ubiquitin specific peptidase 48                                    | USP48   | 707110    |
| Ubiquitin specific peptidase 51                                    | USP51   | 705861    |
| Ubiquitin specific peptidase 8                                     | USP8    | 715523    |
| Ubiquitin specific peptidase 9, Y-linked                           | USP9Y   | 100270704 |
| Ubiquitination factor E4B                                          | UBE4B   | 713348    |
| Ubiquitin-conjugating enzyme E2E 2                                 | UBE2E2  | 699101    |
| Ubiquitin-like modifier activating enzyme 2                        | UBA2    | 705808    |
| Ubiquitin-like modifier activating enzyme 3                        | UBA3    | 696493    |
| Ubiquitin-like modifier activating enzyme 7                        | UBA7    | 704875    |
| Ubiquitin-like with PHD and ring finger domains 1                  | UHRF1   | 695531    |
| U-box domain containing 5                                          | UBOX5   | 717166    |
| UBX domain protein 1                                               | UBXN1   | 718643    |
| UBX domain protein 10                                              | UBXN10  | 705058    |
| UBX domain protein 11                                              | UBXN11  | 719826    |
| UDP glucuronosyltransferase 1 family, polypeptide A1               | UGT1A1  | 574210    |
| UDP glycosyltransferase 3 family, polypeptide A1                   | UGT3A1  | 700115    |
| UDP-Gal:betaglcnaac beta 1,4- galactosyltransferase, polypeptide 1 | B4GALT1 | 703541    |
| UDP-Gal:betaglcnaac beta 1,4- galactosyltransferase, polypeptide 3 | B4GALT3 | 719920    |
| UDP-Gal:betaglcnaac beta 1,4- galactosyltransferase, polypeptide 6 | B4GALT6 | 706068    |
| UDP-glcnaac:betagal beta-1,3-N-acetylglucosaminyltransferase 2     | B3GNT2  | 693396    |
| UDP-glcnaac:betagal beta-1,3-N-acetylglucosaminyltransferase 8     | B3GNT8  | 705336    |
| UDP-glcnaac:betagal beta-1,3-N-acetylglucosaminyltransferase 9     | B3GNT9  | 698037    |
| UDP-glucose ceramide glucosyltransferase                           | UGCG    | 707875    |
| UDP-glucose pyrophosphorylase 2                                    | UGP2    | 695178    |
| UDP-N-acetylglucosamine pyrophosphorylase 1                        | UAP1    | 720116    |
| UFM1-specific ligase 1                                             | UFL1    | 704454    |
| Unc-5 family C-terminal like                                       | UNC5CL  | 719655    |
| Unconventional SNARE in the ER 1 homolog (S. Cerevisiae)           | USE1    | 718905    |
| UPF3 regulator of nonsense transcripts homolog B (yeast)           | UPF3B   | 694247    |
| Up-regulated during skeletal muscle growth 5 homolog (mouse)       | USMG5   | 100428448 |
| Upstream binding protein 1 (LBP-1a)                                | UBP1    | 706283    |

|                                                                           |         |           |
|---------------------------------------------------------------------------|---------|-----------|
| Uracil DNA glycosylase                                                    | UNG     | 706816    |
| Uracil phosphoribosyltransferase homolog                                  | UPRT    | 704157    |
| Uridine-cytidine kinase 1-like 1                                          | UCKL1   | 694692    |
| Uridine-cytidine kinase 2                                                 | UCK2    | 695725    |
| Urocortin                                                                 | UCN     | 699942    |
| Uronyl-2-sulfotransferase                                                 | UST     | 697355    |
| Uroplakin 2                                                               | UPK2    | 707184    |
| USP6 N-terminal like                                                      | USP6NL  | 694275    |
| UTP14, U3 small nucleolar ribonucleoprotein, homolog C (yeast)            | UTP14C  | 709657    |
| UTP23, small subunit processome component                                 | UTP23   | 702915    |
| UTP6 small subunit processome component                                   | UTP6    | 713361    |
| UV radiation resistance associated                                        | UVRAG   | 696601    |
| Uveal autoantigen with coiled-coil domains and ankyrin repeats            | UACA    | 696026    |
| Vac14 homolog (S. Cerevisiae)                                             | VAC14   | 708741    |
| Vaccinia related kinase 1                                                 | VRK1    | 704798    |
| Vacuolar protein sorting 13 homolog C (S. Cerevisiae)                     | VPS13C  | 709080    |
| Vacuolar protein sorting 36 homolog (S. Cerevisiae)                       | VPS36   | 693290    |
| Vacuolar protein sorting 37 homolog C (S. Cerevisiae)                     | VPS37C  | 694898    |
| Vacuolar protein sorting 4 homolog A (S. Cerevisiae)                      | VPS4A   | 705277    |
| Vacuolar protein sorting 45 homolog (S. Cerevisiae)                       | VPS45   | 706035    |
| Vacuolar protein sorting 72 homolog (S. Cerevisiae)                       | VPS72   | 709818    |
| V-akt murine thymoma viral oncogene homolog 3                             | AKT3    | 714717    |
| Valosin containing protein (p97)/p47 complex interacting protein 1        | VCPIP1  | 703582    |
| Valosin containing protein lysine (K) methyltransferase                   | VCPKMT  | 705487    |
| Valyl-trna synthetase                                                     | VARS    | 715537    |
| Vasohibin 2                                                               | VASH2   | 709924    |
| Vav guanine nucleotide exchange factor 1                                  | VAV1    | 100424248 |
| Vav guanine nucleotide exchange factor 3                                  | VAV3    | 694685    |
| Ventral anterior homeobox 2                                               | VAX2    | 703531    |
| Versican                                                                  | VCAN    | 712365    |
| Very low density lipoprotein receptor                                     | VLDLR   | 574284    |
| Vesicle associated membrane protein 1                                     | VAMP1   | 722049    |
| Vesicle associated membrane protein 5                                     | VAMP5   | 695471    |
| Vesicle associated membrane protein 7                                     | VAMP7   | 704160    |
| Vezeatin, adherens junctions transmembrane protein                        | VEZT    | 716675    |
| Vitronectin                                                               | VTN     | 708499    |
| V-kit Hardy-Zuckerman 4 feline sarcoma viral oncogene homolog             | KIT     | 696759    |
| V-myc avian myelocytomatosis viral oncogene homolog                       | MYC     | 694626    |
| V-myc avian myelocytomatosis viral oncogene neuroblastoma derived homolog | MYCN    | 698699    |
| Voltage-dependent anion channel 1                                         | VDAC1   | 710045    |
| Voltage-dependent anion channel 2                                         | VDAC2   | 704257    |
| Von Willebrand factor C and EGF domains                                   | VWCE    | 694385    |
| VPS11, CORVET/HOPS core subunit                                           | VPS11   | 702834    |
| VPS16, CORVET/HOPS core subunit                                           | VPS16   | 100426688 |
| VPS26 retromer complex component B                                        | VPS26B  | 694566    |
| VPS29 retromer complex component                                          | VPS29   | 709646    |
| VPS33B interacting protein, apical-basolateral polarity regulator,        | VIPAS39 | 706315    |

|                                                                               |         |           |
|-------------------------------------------------------------------------------|---------|-----------|
| spe-39 homolog                                                                |         |           |
| VPS41 HOPS complex subunit                                                    | VPS41   | 712457    |
| VPS52 GARP complex subunit                                                    | VPS52   | 100430904 |
| VPS8, CORVET complex subunit                                                  | VPS8    | 701567    |
| V-ral simian leukemia viral oncogene homolog A (ras related)                  | RALA    | 703440    |
| V-ral simian leukemia viral oncogene homolog B                                | RALB    | 695852    |
| V-set and immunoglobulin domain containing 2                                  | VSIG2   | 712047    |
| WAP, follistatin/kazal, immunoglobulin, kunitz and netrin domain containing 2 | WFIKK2  | 703871    |
| WD repeat containing, antisense to TP53                                       | WRAP53  | 716125    |
| WD repeat domain 11                                                           | WDR11   | 714990    |
| WD repeat domain 12                                                           | WDR12   | 705623    |
| WD repeat domain 18                                                           | WDR18   | 704547    |
| WD repeat domain 19                                                           | WDR19   | 698866    |
| WD repeat domain 20                                                           | WDR20   | 708533    |
| WD repeat domain 26                                                           | WDR26   | 704911    |
| WD repeat domain 3                                                            | WDR3    | 711960    |
| WD repeat domain 35                                                           | WDR35   | 716638    |
| WD repeat domain 4                                                            | WDR4    | 714230    |
| WD repeat domain 44                                                           | WDR44   | 710598    |
| WD repeat domain 47                                                           | WDR47   | 696942    |
| WD repeat domain 48                                                           | WDR48   | 695026    |
| WD repeat domain 53                                                           | WDR53   | 709710    |
| WD repeat domain 59                                                           | WDR59   | 710576    |
| WD repeat domain 6                                                            | WDR6    | 708505    |
| WD repeat domain 61                                                           | WDR61   | 709971    |
| WD repeat domain 70                                                           | WDR70   | 706130    |
| WD repeat domain 74                                                           | WDR74   | 718460    |
| WD repeat domain 75                                                           | WDR75   | 709104    |
| WD repeat domain 77                                                           | WDR77   | 677686    |
| WD repeat, sterile alpha motif and U-box domain containing 1                  | WDSUB1  | 699456    |
| WDYHV motif containing 1                                                      | WDYHV1  | 704686    |
| WEE1 G2 checkpoint kinase                                                     | WEE1    | 703760    |
| Werner helicase interacting protein 1                                         | WRNIP1  | 707250    |
| Williams Beuren syndrome chromosome region 22                                 | WBSCR22 | 720121    |
| Williams-Beuren syndrome chromosome region 17                                 | WBSCR17 | 695207    |
| Wilms tumor 1 associated protein                                              | WTAP    | 702295    |
| Wingless-type MMTV integration site family member 10A                         | WNT10A  | 700692    |
| Wingless-type MMTV integration site family member 11                          | WNT11   | 696845    |
| Wingless-type MMTV integration site family member 4                           | WNT4    | 707864    |
| Wiskott-Aldrich syndrome-like                                                 | WASL    | 696556    |
| WNK lysine deficient protein kinase 3                                         | WNK3    | 701015    |
| WSC domain containing 1                                                       | WSCD1   | 712488    |
| WW and C2 domain containing 2                                                 | WWC2    | 701208    |
| WW domain binding protein 1                                                   | WBP1    | 709202    |
| WW domain binding protein 11                                                  | WBP11   | 699451    |
| WW domain binding protein 2                                                   | WBP2    | 704545    |
| WW domain binding protein 5                                                   | WBP5    | 696661    |

|                                                                        |          |        |
|------------------------------------------------------------------------|----------|--------|
| WW domain containing adaptor with coiled-coil                          | WAC      | 715828 |
| WW domain containing E3 ubiquitin protein ligase 2                     | WWP2     | 705464 |
| X-box binding protein 1                                                | XBP1     | 713863 |
| Xeroderma pigmentosum, complementation group A                         | XPA      | 715705 |
| Xeroderma pigmentosum, complementation group C                         | XPC      | 700938 |
| Xg blood group                                                         | XG       | 705377 |
| X-ray repair complementing defective repair in Chinese hamster cells 6 | XRCC6    | 707975 |
| XRCC6 binding protein 1                                                | XRCC6BP1 | 712932 |
| Xylosylprotein beta 1,4-galactosyltransferase, polypeptide 7           | B4GALT7  | 701000 |
| Yael domain containing 1                                               | YAE1D1   | 703786 |
| Y-box binding protein 2                                                | YBX2     | 714750 |
| Y-box binding protein 3                                                | YBX3     | 722347 |
| YEATS domain containing 4                                              | YEATS4   | 718376 |
| Yip1 domain family member 4                                            | YIPF4    | 706819 |
| Yip1 interacting factor homolog A (S. Cerevisiae)                      | YIF1A    | 714486 |
| Yippee like 3                                                          | YPEL3    | 708740 |
| YTH domain containing 2                                                | YTHDC2   | 694612 |
| ZFP14 zinc finger protein                                              | ZFP14    | 719135 |
| ZFP69 zinc finger protein                                              | ZFP69    | 694407 |
| Zinc and ring finger 4                                                 | ZNRF4    | 695996 |
| Zinc binding alcohol dehydrogenase domain containing 2                 | ZADH2    | 701079 |
| Zinc finger (CCCH type), RNA binding motif and serine/arginine rich 2  | ZRSR2    | 720986 |
| Zinc finger and AT-hook domain containing                              | ZFAT     | 698512 |
| Zinc finger and BTB domain containing 16                               | ZBTB16   | 695064 |
| Zinc finger and BTB domain containing 2                                | ZBTB2    | 704782 |
| Zinc finger and BTB domain containing 20                               | ZBTB20   | 712238 |
| Zinc finger and BTB domain containing 25                               | ZBTB25   | 707380 |
| Zinc finger and BTB domain containing 26                               | ZBTB26   | 698776 |
| Zinc finger and BTB domain containing 33                               | ZBTB33   | 695801 |
| Zinc finger and BTB domain containing 39                               | ZBTB39   | 713914 |
| Zinc finger and BTB domain containing 40                               | ZBTB40   | 708181 |
| Zinc finger and BTB domain containing 43                               | ZBTB43   | 701797 |
| Zinc finger and BTB domain containing 48                               | ZBTB48   | 704628 |
| Zinc finger and BTB domain containing 49                               | ZBTB49   | 712422 |
| Zinc finger and BTB domain containing 5                                | ZBTB5    | 718482 |
| Zinc finger and BTB domain containing 6                                | ZBTB6    | 695858 |
| Zinc finger and BTB domain containing 7B                               | ZBTB7B   | 719006 |
| Zinc finger and BTB domain containing 8 opposite strand                | ZBTB8OS  | 708590 |
| Zinc finger and SCAN domain containing 22                              | ZSCAN22  | 712666 |
| Zinc finger and SCAN domain containing 25                              | ZSCAN25  | 709125 |
| Zinc finger and SCAN domain containing 29                              | ZSCAN29  | 710414 |
| Zinc finger and SCAN domain containing 32                              | ZSCAN32  | 702733 |
| Zinc finger and SCAN domain containing 5A                              | ZSCAN5A  | 705629 |
| Zinc finger and SCAN domain containing 9                               | ZSCAN9   | 703493 |
| Zinc finger CCCH-type containing 12A                                   | ZC3H12A  | 713604 |
| Zinc finger CCCH-type containing 3                                     | ZC3H3    | 708584 |



|                                      |         |           |
|--------------------------------------|---------|-----------|
| Zinc finger CCCH-type containing 7A  | ZC3H7A  | 711984    |
| Zinc finger E-box binding homeobox 2 | ZEB2    | 705439    |
| Zinc finger protein 112              | ZNF112  | 713527    |
| Zinc finger protein 140              | ZNF140  | 695171    |
| Zinc finger protein 155              | ZNF155  | 712736    |
| Zinc finger protein 169              | ZNF169  | 718203    |
| Zinc finger protein 17               | ZNF17   | 707664    |
| Zinc finger protein 180              | ZNF180  | 712493    |
| Zinc finger protein 181              | ZNF181  | 106992424 |
| Zinc finger protein 207              | ZNF207  | 100689488 |
| Zinc finger protein 211              | ZNF211  | 100429296 |
| Zinc finger protein 22               | ZNF22   | 706208    |
| Zinc finger protein 221              | ZNF221  | 100423744 |
| Zinc finger protein 239              | ZNF239  | 717737    |
| Zinc finger protein 24               | ZNF24   | 100426672 |
| Zinc finger protein 25               | ZNF25   | 701129    |
| Zinc finger protein 250              | ZNF250  | 704805    |
| Zinc finger protein 263              | ZNF263  | 702166    |
| Zinc finger protein 280D             | ZNF280D | 699509    |
| Zinc finger protein 281              | ZNF281  | 709466    |
| Zinc finger protein 285              | ZNF285  | 106994792 |
| Zinc finger protein 296              | ZNF296  | 713620    |
| Zinc finger protein 304              | ZNF304  | 100428176 |
| Zinc finger protein 32               | ZNF32   | 705373    |
| Zinc finger protein 322              | ZNF322  | 701098    |
| Zinc finger protein 330              | ZNF330  | 699364    |
| Zinc finger protein 334              | ZNF334  | 706702    |
| Zinc finger protein 335              | ZNF335  | 708282    |
| Zinc finger protein 354B             | ZNF354B | 712885    |
| Zinc finger protein 383              | ZNF383  | 100425344 |
| Zinc finger protein 385A             | ZNF385A | 705436    |
| Zinc finger protein 385B             | ZNF385B | 704204    |
| Zinc finger protein 41               | ZNF41   | 706770    |
| Zinc finger protein 410              | ZNF410  | 698124    |
| Zinc finger protein 423              | ZNF423  | 693808    |
| Zinc finger protein 436              | ZNF436  | 709638    |
| Zinc finger protein 460              | ZNF460  | 710080    |
| Zinc finger protein 462              | ZNF462  | 711489    |
| Zinc finger protein 484              | ZNF484  | 711976    |
| Zinc finger protein 496              | ZNF496  | 709694    |
| Zinc finger protein 513              | ZNF513  | 700577    |
| Zinc finger protein 521              | ZNF521  | 709169    |
| Zinc finger protein 532              | ZNF532  | 701146    |
| Zinc finger protein 572              | ZNF572  | 712116    |
| Zinc finger protein 573              | ZNF573  | 719389    |
| Zinc finger protein 581              | ZNF581  | 100428424 |
| Zinc finger protein 583              | ZNF583  | 705205    |
| Zinc finger protein 593              | ZNF593  | 714086    |

|                                                  |         |           |
|--------------------------------------------------|---------|-----------|
| Zinc finger protein 595                          | ZNF595  | 716693    |
| Zinc finger protein 597                          | ZNF597  | 703089    |
| Zinc finger protein 599                          | ZNF599  | 706512    |
| Zinc finger protein 608                          | ZNF608  | 702182    |
| Zinc finger protein 613                          | ZNF613  | 719851    |
| Zinc finger protein 620                          | ZNF620  | 100423712 |
| Zinc finger protein 622                          | ZNF622  | 100429384 |
| Zinc finger protein 627                          | ZNF627  | 716820    |
| Zinc finger protein 638                          | ZNF638  | 704418    |
| Zinc finger protein 646                          | ZNF646  | 712774    |
| Zinc finger protein 652                          | ZNF652  | 699084    |
| Zinc finger protein 653                          | ZNF653  | 714754    |
| Zinc finger protein 664                          | ZNF664  | 710703    |
| Zinc finger protein 671                          | ZNF671  | 708932    |
| Zinc finger protein 684                          | ZNF684  | 695691    |
| Zinc finger protein 687                          | ZNF687  | 716590    |
| Zinc finger protein 7                            | ZNF7    | 715735    |
| Zinc finger protein 777                          | ZNF777  | 711987    |
| Zinc finger protein 79                           | ZNF79   | 700961    |
| Zinc finger protein 800                          | ZNF800  | 697855    |
| Zinc finger protein 804B                         | ZNF804B | 704561    |
| Zinc finger protein 821                          | ZNF821  | 707355    |
| Zinc finger protein 92                           | ZNF92   | 708683    |
| Zinc finger protein interacting with K protein 1 | ZIK1    | 708621    |
| Zinc finger protein, X-linked                    | ZFX     | 106992280 |
| Zinc finger RNA binding protein                  | ZFR     | 696882    |
| Zinc finger with KRAB and SCAN domains 3         | ZKSCAN3 | 707581    |
| Zinc finger with UFM1-specific peptidase domain  | ZUFSP   | 718059    |
| Zinc finger, AN1-type domain 2A                  | ZFAND2A | 100426344 |
| Zinc finger, AN1-type domain 3                   | ZFAND3  | 719346    |
| Zinc finger, AN1-type domain 4                   | ZFAND4  | 708136    |
| Zinc finger, B-box domain containing             | ZBBX    | 700091    |
| Zinc finger, BED-type containing 4               | ZBED4   | 715118    |
| Zinc finger, BED-type containing 8               | ZBED8   | 695905    |
| Zinc finger, BED-type containing 9               | ZBED9   | 708122    |
| Zinc finger, C3H1-type containing                | ZFC3H1  | 718671    |
| Zinc finger, C4H2 domain containing              | ZC4H2   | 708764    |
| Zinc finger, CCHC-type with G-patch domain       | ZGPAT   | 719499    |
| Zinc finger, CCHC domain containing 11           | ZCCHC11 | 713406    |
| Zinc finger, CCHC domain containing 14           | ZCCHC14 | 703833    |
| Zinc finger, CCHC domain containing 17           | ZCCHC17 | 705172    |
| Zinc finger, CCHC domain containing 6            | ZCCHC6  | 693660    |
| Zinc finger, CCHC domain containing 7            | ZCCHC7  | 716658    |
| Zinc finger, CCHC domain containing 8            | ZCCHC8  | 702359    |
| Zinc finger, DHHC-type containing 12             | ZDHHC12 | 722606    |
| Zinc finger, DHHC-type containing 15             | ZDHHC15 | 704366    |
| Zinc finger, DHHC-type containing 16             | ZDHHC16 | 705982    |
| Zinc finger, DHHC-type containing 2              | ZDHHC2  | 710001    |

|                                                |          |        |
|------------------------------------------------|----------|--------|
| Zinc finger, HIT-type containing 1             | ZNHIT1   | 714339 |
| Zinc finger, HIT-type containing 2             | ZNHIT2   | 716729 |
| Zinc finger, matrin-type 2                     | ZMAT2    | 697247 |
| Zinc finger, matrin-type 5                     | ZMAT5    | 715058 |
| Zinc finger, MYM-type 2                        | ZMYM2    | 721255 |
| Zinc finger, MYM-type 3                        | ZMYM3    | 697147 |
| Zinc finger, MYND-type containing 11           | ZMYND11  | 708761 |
| Zinc finger, MYND-type containing 12           | ZMYND12  | 696941 |
| Zinc finger, RAN-binding domain containing 2   | ZRANB2   | 703513 |
| Zinc finger, ZZ-type with EF-hand domain 1     | ZZEF1    | 721518 |
| Zinc metalloproteinase STE24                   | ZMPSTE24 | 693765 |
| Zinc ribbon domain containing 1                | ZNRD1    | 712151 |
| Zona pellucida glycoprotein 3 (sperm receptor) | ZP3      | 719925 |
| Zyg-11 related, cell cycle regulator           | ZER1     | 717262 |
| Zyxin                                          | ZYX      | 706407 |

---

**(3) Expressed in both groups 2b and 2c, not in group 2a**

---

|                                                           |        |           |
|-----------------------------------------------------------|--------|-----------|
| 1-acylglycerol-3-phosphate O-acyltransferase 1            | AGPAT1 | 717174    |
| 1-acylglycerol-3-phosphate O-acyltransferase 5            | AGPAT5 | 716847    |
| 2,4-dienoyl-coa reductase 1, mitochondrial                | DECR1  | 696035    |
| 2-phosphoxylose phosphatase 1                             | PXYLP1 | 715229    |
| 3-hydroxy-3-methylglutaryl-coa synthase 2 (mitochondrial) | HMGCS2 | 713541    |
| 3-hydroxyacyl-coa dehydratase 1                           | HACD1  | 700635    |
| 3-oxoacyl-ACP synthase, mitochondrial                     | OXSM   | 703382    |
| 5'-3' exoribonuclease 2                                   | XRN2   | 700934    |
| 5'-nucleotidase, cytosolic IIIA                           | NT5C3A | 708743    |
| 5-phosphohydroxy-L-lysine phospho-lyase                   | PHYKPL | 702302    |
| 8-oxoguanine DNA glycosylase                              | OGG1   | 700481    |
| Abhydrolase domain containing 12                          | ABHD12 | 705915    |
| Abhydrolase domain containing 8                           | ABHD8  | 718980    |
| ABI family member 3                                       | ABI3   | 698710    |
| Acetyl-coa acetyltransferase 1                            | ACAT1  | 707653    |
| Acetyl-coa acyltransferase 2                              | ACAA2  | 709350    |
| Acetyl-coa carboxylase alpha                              | ACACA  | 714218    |
| Acid sensing ion channel subunit 3                        | ASIC3  | 714396    |
| Acidic nuclear phosphoprotein 32 family member B          | ANP32B | 715508    |
| Acidic residue methyltransferase 1                        | ARMT1  | 704570    |
| Aconitase 1                                               | ACO1   | 705075    |
| Aconitase 2                                               | ACO2   | 707441    |
| Acrosin binding protein                                   | ACRBP  | 713219    |
| Actin like 7B                                             | ACTL7B | 710750    |
| Actin related protein 2/3 complex subunit 1A              | ARPC1A | 718635    |
| Actin related protein 2/3 complex subunit 2               | ARPC2  | 700536    |
| Actin related protein 2/3 complex subunit 3               | ARPC3  | 709199    |
| Actin, alpha 2, smooth muscle, aorta                      | ACTA2  | 100427024 |
| Activating transcription factor 4                         | ATF4   | 703965    |

|                                                                      |          |           |
|----------------------------------------------------------------------|----------|-----------|
| Activin A receptor type I                                            | ACVR1    | 697935    |
| Activin A receptor type IB                                           | ACVR1B   | 696587    |
| Activin A receptor type IL                                           | ACVRL1   | 696471    |
| Acyl-coa binding domain containing 3                                 | ACBD3    | 699311    |
| Acyl-coa binding domain containing 6                                 | ACBD6    | 716418    |
| Acyl-coa dehydrogenase, C-4 to C-12 straight chain                   | ACADM    | 705168    |
| Acyl-coa oxidase 1, palmitoyl                                        | ACOX1    | 705197    |
| Acyl-coa thioesterase 13                                             | ACOT13   | 100335136 |
| Acyloxyacyl hydrolase                                                | AOAH     | 706291    |
| ADAM metallopeptidase domain 21                                      | ADAM21   | 715640    |
| ADAM metallopeptidase domain 29                                      | ADAM29   | 698113    |
| ADAM metallopeptidase with thrombospondin type 1 motif 1             | ADAMTS1  | 707778    |
| ADAM metallopeptidase with thrombospondin type 1 motif 14            | ADAMTS14 | 710154    |
| ADAM metallopeptidase with thrombospondin type 1 motif 17            | ADAMTS17 | 693447    |
| ADAM metallopeptidase with thrombospondin type 1 motif 6             | ADAMTS6  | 696021    |
| Adaptor related protein complex 1 associated regulatory protein      | AP1AR    | 700734    |
| Adaptor related protein complex 3, beta 2 subunit                    | AP3B2    | 694091    |
| Adaptor related protein complex 3, sigma 1 subunit                   | AP3S1    | 696644    |
| Adaptor related protein complex 4, beta 1 subunit                    | AP4B1    | 707634    |
| Adducin 1                                                            | ADD1     | 700805    |
| Adducin 2                                                            | ADD2     | 702939    |
| Adducin 3                                                            | ADD3     | 677712    |
| Adenosine deaminase, RNA-specific, B1                                | ADARB1   | 722016    |
| Adenosine monophosphate deaminase 2                                  | AMPD2    | 699561    |
| Adenylate cyclase 4                                                  | ADCY4    | 714684    |
| Adenylate kinase 3                                                   | AK3      | 694714    |
| Adenylosuccinate synthase                                            | ADSS     | 713580    |
| Adhesion G protein-coupled receptor A3                               | ADGRA3   | 715618    |
| Adhesion G protein-coupled receptor L2                               | ADGRL2   | 708998    |
| Adhesion molecule with Ig-like domain 1                              | AMIGO1   | 698932    |
| Adhesion molecule with Ig-like domain 2                              | AMIGO2   | 705386    |
| Adipogenesis regulatory factor                                       | ADIRF    | 699173    |
| Adiponectin receptor 2                                               | ADIPOR2  | 707547    |
| ADP ribosylation factor 3                                            | ARF3     | 708716    |
| ADP ribosylation factor 4                                            | ARF4     | 703432    |
| ADP ribosylation factor guanine nucleotide exchange factor 1         | ARFGEF1  | 704359    |
| ADP ribosylation factor like gtpase 10                               | ARL10    | 696524    |
| ADP ribosylation factor like gtpase 6                                | ARL6     | 696616    |
| ADP ribosylation factor like gtpase 6 interacting protein 5          | ARL6IP5  | 696360    |
| ADP-ribosylhydrolase like 2                                          | ADPRHL2  | 712758    |
| Aftiphilin                                                           | AFTPH    | 696100    |
| AHA1, activator of heat shock 90kda protein ATPase homolog 1 (yeast) | AHSA1    | 706547    |
| Ajuba LIM protein                                                    | AJUBA    | 712865    |
| A-kinase anchoring protein 2                                         | AKAP2    | 709841    |
| A-kinase anchoring protein 3                                         | AKAP3    | 711162    |
| A-kinase anchoring protein 7                                         | AKAP7    | 710509    |
| A-kinase anchoring protein 9                                         | AKAP9    | 702970    |

|                                                                             |          |           |
|-----------------------------------------------------------------------------|----------|-----------|
| Aladin WD repeat nucleoporin                                                | AAAS     | 719095    |
| Alanine-glyoxylate aminotransferase                                         | AGXT     | 699941    |
| Alanine--glyoxylate aminotransferase 2                                      | AGXT2    | 699250    |
| Aldehyde dehydrogenase 1 family member A1                                   | ALDH1A1  | 702598    |
| Aldehyde dehydrogenase 18 family member A1                                  | ALDH18A1 | 703357    |
| Aldo-keto reductase family 1, member B1 (aldose reductase)                  | AKR1B1   | 705957    |
| ALG2, alpha-1,3/1,6-mannosyltransferase                                     | ALG2     | 714850    |
| ALG5, dolichyl-phosphate beta-glucosyltransferase                           | ALG5     | 694836    |
| Alkb homolog 4, lysine demethylase                                          | ALKBH4   | 715078    |
| Alkb homolog 5, RNA demethylase                                             | ALKBH5   | 700205    |
| All-trans retinoic acid induced differentiation factor                      | ATRAID   | 699201    |
| Alpha hemoglobin stabilizing protein                                        | AHSP     | 714392    |
| Alpha thalassemia/mental retardation syndrome X-linked                      | ATRX     | 705735    |
| Alpha-2-macroglobulin                                                       | A2M      | 716834    |
| Alpha-defensin 1A                                                           | MNP1A    | 574196    |
| Aly/REF export factor                                                       | ALYREF   | 714852    |
| Amine oxidase, copper containing 1                                          | AOC1     | 714112    |
| Aminoacylase 3                                                              | ACY3     | 711083    |
| Aminoadipate-semialdehyde dehydrogenase-phospho<br>pantetheinyl transferase | AASDHPPT | 100328984 |
| Aminoadipate-semialdehyde synthase                                          | AASS     | 694594    |
| Amino-terminal enhancer of split                                            | AES      | 712353    |
| Amphiphysin                                                                 | AMPH     | 704559    |
| Amylase, alpha 2B (pancreatic)                                              | AMY2B    | 712893    |
| Amyloid beta (A4) precursor protein-binding, family A, member 1             | APBA1    | 699838    |
| Amyloid beta (A4) precursor protein-binding, family B, member 3             | APBB3    | 698296    |
| Anaphase promoting complex subunit 15                                       | ANAPC15  | 718333    |
| Anaphase promoting complex subunit 2                                        | ANAPC2   | 706384    |
| Anaphase promoting complex subunit 4                                        | ANAPC4   | 694006    |
| Ancient ubiquitous protein 1                                                | AUP1     | 710020    |
| Androgen-induced 1                                                          | AIG1     | 700988    |
| Angio associated migratory cell protein                                     | AAMP     | 700763    |
| Angiopoietin like 2                                                         | ANGPTL2  | 701444    |
| Ankyrin 2, neuronal                                                         | ANK2     | 702180    |
| Ankyrin 3, node of Ranvier (ankyrin G)                                      | ANK3     | 699518    |
| Ankyrin repeat and IBR domain containing 1                                  | ANKIB1   | 703273    |
| Ankyrin repeat and MYND domain containing 2                                 | ANKMY2   | 709414    |
| Ankyrin repeat domain 2 (stretch responsive muscle)                         | ANKRD2   | 707097    |
| Ankyrin repeat domain 27                                                    | ANKRD27  | 716232    |
| Ankyrin repeat domain 35                                                    | ANKRD35  | 706961    |
| Ankyrin repeat domain 46                                                    | ANKRD46  | 705491    |
| Ankyrin repeat domain 6                                                     | ANKRD6   | 701339    |
| Annexin A1                                                                  | ANXA1    | 702946    |
| Annexin A11                                                                 | ANXA11   | 707628    |
| Annexin A2                                                                  | ANXA2    | 706240    |
| Annexin A3                                                                  | ANXA3    | 697239    |
| Annexin A7                                                                  | ANXA7    | 707166    |
| Annexin A9                                                                  | ANXA9    | 708704    |

|                                                                                                      |          |         |
|------------------------------------------------------------------------------------------------------|----------|---------|
| Anoctamin 10                                                                                         | ANO10    | 715666  |
| Anoctamin 4                                                                                          | ANO4     | 695973  |
| Anterior gradient 2, protein disulphide isomerase family member                                      | AGR2     | 709127  |
| Anterior gradient 3, protein disulphide isomerase family member                                      | AGR3     | 714517  |
| Apelin receptor                                                                                      | APLNR    | 706823  |
| APEX nuclease (apurinic/apyrimidinic endonuclease) 2                                                 | APEX2    | 702084  |
| APEX nuclease (multifunctional DNA repair enzyme) 1                                                  | APEX1    | 702757  |
| Apolipoprotein A-II                                                                                  | APOA2    | 719946  |
| Apolipoprotein A-V                                                                                   | APOA5    | 696484  |
| Apolipoprotein B mrna editing enzyme, catalytic polypeptide-like 3H                                  | APOBEC3H | 723811  |
| Apolipoprotein L2                                                                                    | APOL2    | 694029  |
| Apolipoprotein O                                                                                     | APOO     | 698137  |
| Apoptosis inducing factor, mitochondria associated 1                                                 | AIFM1    | 702773  |
| Apoptosis inhibitor 5                                                                                | API5     | 716346  |
| Arfgap with gtpase domain, ankyrin repeat and PH domain 1                                            | AGAP1    | 693652  |
| ARFGEF family member 3                                                                               | ARFGEF3  | 703791  |
| Arginine and glutamate rich 1                                                                        | ARGLU1   | 702840  |
| Arginine/serine-rich protein 1                                                                       | RSRP1    | 712757  |
| Arginine-glutamic acid dipeptide (RE) repeats                                                        | RERE     | 708902  |
| Arginyltransferase 1                                                                                 | ATE1     | 705248  |
| Arginyl-trna synthetase                                                                              | RARS     | 698998  |
| Arginyl-trna synthetase 2, mitochondrial                                                             | RARS2    | 699240  |
| Armadillo repeat containing 9                                                                        | ARMC9    | 711891  |
| Armadillo repeat gene deleted in velocardiofacial syndrome                                           | ARVCF    | 712399  |
| ARP2 actin-related protein 2 homolog (yeast)                                                         | ACTR2    | 697080  |
| ARP5 actin-related protein 5 homolog (yeast)                                                         | ACTR5    | 698191  |
| Arrestin, beta 2                                                                                     | ARRB2    | 709399  |
| Artemin                                                                                              | ARTN     | 701641  |
| ARV1 homolog, fatty acid homeostasis modulator                                                       | ARV1     | 713975  |
| Aryl hydrocarbon receptor nuclear translocator like                                                  | ARNTL    | 700464  |
| Aspartate beta-hydroxylase domain containing 1                                                       | ASPHD1   | 707467  |
| Aspartate dehydrogenase domain containing                                                            | ASPDH    | 719609  |
| Aspartoacylase                                                                                       | ASPA     | 706170  |
| Aspartyl aminopeptidase                                                                              | DNPEP    | 703180  |
| Asteroid homolog 1 (Drosophila)                                                                      | ASTE1    | 719271  |
| Ataxin 2-like                                                                                        | ATXN2L   | 708359  |
| ATP binding cassette subfamily A member 1                                                            | ABCA1    | 716146  |
| ATP binding cassette subfamily B member 6 (Langereis blood group)                                    | ABCB6    | 704599  |
| ATP binding cassette subfamily D member 1                                                            | ABCD1    | 696794  |
| ATP binding cassette subfamily E member 1                                                            | ABCE1    | 701945  |
| ATP synthase F0 subunit 6                                                                            | ATP6     | 2846629 |
| ATP synthase, H <sup>+</sup> transporting, mitochondrial F1 complex, alpha subunit 1, cardiac muscle | ATP5A1   | 701389  |
| ATP synthase, H <sup>+</sup> transporting, mitochondrial F1 complex, beta polypeptide                | ATP5B    | 713284  |
| ATP synthase, H <sup>+</sup> transporting, mitochondrial F1 complex,                                 | ATP5D    | 705944  |

|                                                                                          |          |           |
|------------------------------------------------------------------------------------------|----------|-----------|
| delta subunit                                                                            |          |           |
| ATP synthase, H <sup>+</sup> transporting, mitochondrial F1 complex, gamma polypeptide 1 | ATP5C1   | 713768    |
| ATP synthase, H <sup>+</sup> transporting, mitochondrial F1 complex, O subunit           | ATP5O    | 698480    |
| ATP synthase, H <sup>+</sup> transporting, mitochondrial Fo complex subunit F6           | ATP5J    | 708411    |
| ATPase inhibitory factor 1                                                               | ATPIF1   | 716870    |
| ATPase type 13A1                                                                         | ATP13A1  | 100427504 |
| ATPase, Ca <sup>++</sup> transporting, plasma membrane 1                                 | ATP2B1   | 709102    |
| ATPase, Ca <sup>++</sup> transporting, ubiquitous                                        | ATP2A3   | 707768    |
| ATPase, class II, type 9A                                                                | ATP9A    | 710250    |
| ATPase, H <sup>+</sup> transporting, lysosomal 14kda, V1 subunit F                       | ATP6V1F  | 702112    |
| ATPase, H <sup>+</sup> transporting, lysosomal 21kda, V0 subunit b                       | ATP6V0B  | 702243    |
| ATPase, H <sup>+</sup> transporting, lysosomal 31kda, V1 subunit E1                      | ATP6V1E1 | 709739    |
| ATPase, H <sup>+</sup> transporting, lysosomal 9kda, V0 subunit e1                       | ATP6V0E1 | 703342    |
| ATPase, H <sup>+</sup> transporting, lysosomal accessory protein 2                       | ATP6AP2  | 705048    |
| ATPase, H <sup>+</sup> /K <sup>+</sup> exchanging, alpha polypeptide                     | ATP4A    | 100426216 |
| ATPase, Na <sup>+</sup> /K <sup>+</sup> transporting, alpha 1 polypeptide                | ATP1A1   | 710368    |
| ATR interacting protein                                                                  | ATRIP    | 710035    |
| ATR serine/threonine kinase                                                              | ATR      | 714443    |
| AT-rich interaction domain 2                                                             | ARID2    | 703823    |
| AT-rich interaction domain 4B                                                            | ARID4B   | 718320    |
| Aurora kinase A interacting protein 1                                                    | AURKAIP1 | 706329    |
| Aurora kinase B                                                                          | AURKB    | 721955    |
| Aurora kinase C                                                                          | AURKC    | 709801    |
| Autophagy related 16 like 1                                                              | ATG16L1  | 714092    |
| Autophagy related 16 like 2                                                              | ATG16L2  | 717952    |
| Autophagy related 2A                                                                     | ATG2A    | 717290    |
| Autophagy related 3                                                                      | ATG3     | 708305    |
| Autophagy related 4C, cysteine peptidase                                                 | ATG4C    | 695606    |
| Autophagy related 4D, cysteine peptidase                                                 | ATG4D    | 713111    |
| Autophagy related 5                                                                      | ATG5     | 696874    |
| Autophagy related 7                                                                      | ATG7     | 696238    |
| B9 protein domain 2                                                                      | B9D2     | 704873    |
| Bardet-Biedl syndrome 12                                                                 | BBS12    | 710538    |
| Bardet-Biedl syndrome 4                                                                  | BBS4     | 704508    |
| Bardet-Biedl syndrome 5                                                                  | BBS5     | 709701    |
| BARX homeobox 2                                                                          | BARX2    | 715001    |
| Basic leucine zipper and W2 domains 2                                                    | BZW2     | 714627    |
| Basic transcription factor 3                                                             | BTF3     | 703339    |
| Basonuclin 2                                                                             | BNC2     | 713291    |
| B-cell CLL/lymphoma 6                                                                    | BCL6     | 708736    |
| B-cell CLL/lymphoma 7B                                                                   | BCL7B    | 716470    |
| B-cell translocation gene 1, anti-proliferative                                          | BTG1     | 710112    |
| BCL2 associated athanogene 3                                                             | BAG3     | 714420    |
| BCL2/adenovirus E1B 19kda interacting protein 2                                          | BNIP2    | 703234    |
| BCL2-associated X protein                                                                | BAX      | 718948    |

|                                                                      |          |        |
|----------------------------------------------------------------------|----------|--------|
| BCS1-like (S. Cerevisiae)                                            | BCS1L    | 699690 |
| Beclin 1, autophagy related                                          | BECN1    | 711649 |
| BEN domain containing 5                                              | BEND5    | 711150 |
| BEN domain containing 6                                              | BEND6    | 712498 |
| Beta-1,3-glucuronyltransferase 3                                     | B3GAT3   | 718744 |
| Beta-1,4-N-acetyl-galactosaminyl transferase 2                       | B4GALNT2 | 700278 |
| Beta-1,4-N-acetyl-galactosaminyl transferase 3                       | B4GALNT3 | 706259 |
| Beta-2-microglobulin                                                 | B2M      | 712428 |
| Beta-carotene oxygenase 2                                            | BCO2     | 712095 |
| Bicaudal D homolog 2 (Drosophila)                                    | BICD2    | 706621 |
| Bisphosphoglycerate mutase                                           | BPGM     | 706741 |
| BLOC-1 related complex subunit 5                                     | BORCS5   | 696469 |
| Bloom syndrome, recq helicase-like                                   | BLM      | 703460 |
| Bola family member 1                                                 | BOLA1    | 705297 |
| Bola family member 3                                                 | BOLA3    | 707871 |
| Bone marrow stromal cell antigen 2                                   | BST2     | 719092 |
| Bone morphogenetic protein 1                                         | BMP1     | 707596 |
| Bone morphogenetic protein 4                                         | BMP4     | 694618 |
| Bone morphogenetic protein/retinoic acid inducible neural-specific 1 | BRINP1   | 701794 |
| Bora, aurora kinase A activator                                      | BORA     | 693798 |
| BPI fold containing family A member 2                                | BPIFA2   | 710376 |
| Brain protein I3                                                     | BRI3     | 706525 |
| Branched chain keto acid dehydrogenase E1, beta polypeptide          | BCKDHB   | 718472 |
| Branched chain ketoacid dehydrogenase kinase                         | BCKDK    | 712985 |
| BRCA1 associated RING domain 1                                       | BARD1    | 694301 |
| BRISC and BRCA1 A complex member 1                                   | BABAM1   | 718969 |
| Bromo adjacent homology domain containing 1                          | BAHD1    | 702982 |
| Bromodomain adjacent to zinc finger domain 1B                        | BAZ1B    | 716436 |
| Bromodomain containing 1                                             | BRD1     | 715059 |
| Bromodomain containing 2                                             | BRD2     | 717893 |
| Bromodomain containing 7                                             | BRD7     | 694850 |
| BTB (POZ) domain containing 1                                        | BTBD1    | 718696 |
| BTB (POZ) domain containing 16                                       | BTBD16   | 705610 |
| BTG family member 3                                                  | BTG3     | 710579 |
| BTG3 associated nuclear protein                                      | BANP     | 696125 |
| BUB3 mitotic checkpoint protein                                      | BUB3     | 708033 |
| Bystin like                                                          | BYSL     | 694976 |
| C2CD2-like                                                           | C2CD2L   | 703424 |
| Cadherin 11, type 2, OB-cadherin (osteoblast)                        | CDH11    | 708826 |
| Cadherin 2, type 1, N-cadherin (neuronal)                            | CDH2     | 711526 |
| Cadherin related family member 2                                     | CDHR2    | 697249 |
| Calcitonin-related polypeptide alpha                                 | CALCA    | 700649 |
| Calcium and integrin binding family member 2                         | CIB2     | 709429 |
| Calcium binding protein 39                                           | CAB39    | 711166 |
| Calcium binding protein 4                                            | CABP4    | 711973 |
| Calcium binding tyrosine-(Y)-phosphorylation regulated               | CABYR    | 701670 |
| Calcium homeostasis endoplasmic reticulum protein                    | CHERP    | 718689 |



|                                                                                  |         |           |
|----------------------------------------------------------------------------------|---------|-----------|
| Calcium/calmodulin-dependent protein kinase I                                    | CAMK1   | 700212    |
| Calcium/calmodulin-dependent protein kinase II delta                             | CAMK2D  | 702504    |
| Calcium/calmodulin-dependent protein kinase II gamma                             | CAMK2G  | 705980    |
| Calcium/calmodulin-dependent protein kinase kinase 1, alpha                      | CAMKK1  | 707562    |
| Calmin (calponin-like, transmembrane)                                            | CLMN    | 709910    |
| Calmodulin like 3                                                                | CALML3  | 722513    |
| Calmodulin regulated spectrin associated protein family member 2                 | CAMSAP2 | 709092    |
| Calnexin                                                                         | CANX    | 704794    |
| Calpain 10                                                                       | CAPN10  | 716360    |
| Calpain 15                                                                       | CAPN15  | 695881    |
| Calpain 2, (m/II) large subunit                                                  | CAPN2   | 703047    |
| Calpain 3                                                                        | CAPN3   | 707913    |
| Calreticulin                                                                     | CALR    | 716910    |
| Camp responsive element binding protein 3                                        | CREB3   | 696350    |
| Camp responsive element binding protein 3-like 4                                 | CREB3L4 | 715951    |
| Camp responsive element modulator                                                | CREM    | 698636    |
| CAP, adenylate cyclase-associated protein 1 (yeast)                              | CAP1    | 693719    |
| Capping protein (actin filament) muscle Z-line, alpha 1                          | CAPZA1  | 705653    |
| Capping protein (actin filament), gelsolin-like                                  | CAPG    | 695288    |
| Caprin family member 2                                                           | CAPRIN2 | 693594    |
| Carbamoyl-phosphate synthetase 2, aspartate transcarbamylase, and dihydroorotase | CAD     | 699460    |
| Carbohydrate (chondroitin 4) sulfotransferase 11                                 | CHST11  | 700690    |
| Carbohydrate (chondroitin 4) sulfotransferase 13                                 | CHST13  | 716548    |
| Carbohydrate (keratan sulfate Gal-6) sulfotransferase 1                          | CHST1   | 715176    |
| Carbohydrate (N-acetylgalactosamine 4-O) sulfotransferase 14                     | CHST14  | 703115    |
| Carbohydrate (N-acetylgalactosamine 4-sulfate 6-O) sulfo transferase 15          | CHST15  | 693845    |
| Carbohydrate (N-acetylglucosamine 6-O) sulfotransferase 7                        | CHST7   | 704906    |
| Carbohydrate sulfotransferase 8                                                  | CHST8   | 106992408 |
| Carbonic anhydrase VB, mitochondrial                                             | CA5B    | 713128    |
| Carbonic anhydrase VII                                                           | CA7     | 696681    |
| Carbonic anhydrase XIV                                                           | CA14    | 706360    |
| Carboxypeptidase A5                                                              | CPA5    | 702974    |
| Carboxypeptidase N subunit 2                                                     | CPN2    | 106997192 |
| Carboxypeptidase Q                                                               | CPQ     | 701711    |
| Carboxypeptidase X (M14 family), member 1                                        | CPXM1   | 716790    |
| Carboxypeptidase, vitellogenic-like                                              | CPVL    | 697111    |
| Cardiotrophin 1                                                                  | CTF1    | 713850    |
| Carnitine O-acetyltransferase                                                    | CRAT    | 716908    |
| Carnitine palmitoyltransferase 1B                                                | CPT1B   | 720697    |
| Carnosine dipeptidase 1 (metallopeptidase M20 family)                            | CNDP1   | 695195    |
| Cartilage acidic protein 1                                                       | CRTAC1  | 707486    |
| Casein kinase 2, alpha 1 polypeptide                                             | CSNK2A1 | 714841    |
| Casein kinase 2, beta polypeptide                                                | CSNK2B  | 715807    |
| Caspase 1                                                                        | CASP1   | 706568    |
| Caspase 4                                                                        | CASP4   | 704864    |

|                                                   |          |           |
|---------------------------------------------------|----------|-----------|
| Caspase 9                                         | CASP9    | 694544    |
| Caspase activity and apoptosis inhibitor 1        | CAAP1    | 707992    |
| Caspase recruitment domain family member 9        | CARD9    | 710485    |
| Cat eye syndrome chromosome region, candidate 5   | CECR5    | 709197    |
| Catalase                                          | CAT      | 717406    |
| Catechol-O-methyltransferase                      | COMT     | 712548    |
| Catenin alpha-like 1                              | CTNNAL1  | 710389    |
| Catenin delta 1                                   | CTNND1   | 704212    |
| Cathepsin A                                       | CTSA     | 708592    |
| Cathepsin B                                       | CTSB     | 100424760 |
| Cathepsin C                                       | CTSC     | 705320    |
| Cathepsin H                                       | CTSH     | 711437    |
| Cathepsin L                                       | CTSL     | 694569    |
| Cation channel, sperm associated 2                | CATSPER2 | 710876    |
| Caudal type homeobox 4                            | CDX4     | 701374    |
| Cbl proto-oncogene B, E3 ubiquitin protein ligase | CBLB     | 703879    |
| CCAAT/enhancer binding protein (C/EBP), zeta      | CEBPZ    | 712090    |
| CCR4-NOT transcription complex subunit 3          | CNOT3    | 693292    |
| CCR4-NOT transcription complex subunit 7          | CNOT7    | 702192    |
| CD19 molecule                                     | CD19     | 705211    |
| CD1c molecule                                     | CD1C     | 717148    |
| CD200 molecule                                    | CD200    | 708110    |
| CD274 molecule                                    | CD274    | 716043    |
| CD4 molecule                                      | CD4      | 713807    |
| CD40 ligand                                       | CD40LG   | 574160    |
| CD63 molecule                                     | CD63     | 709828    |
| CD7 molecule                                      | CD7      | 719501    |
| CD8b molecule                                     | CD8B     | 699409    |
| CD9 molecule                                      | CD9      | 712262    |
| CD99 molecule like 2                              | CD99L2   | 708996    |
| CDC like kinase 3                                 | CLK3     | 702511    |
| CDC28 protein kinase regulatory subunit 1B        | CKS1B    | 717164    |
| CDKN1A interacting zinc finger protein 1          | CIZ1     | 717725    |
| Cell cycle and apoptosis regulator 2              | CCAR2    | 716288    |
| Cell death-inducing DFFA-like effector b          | CIDEB    | 100425328 |
| Cell division cycle 123                           | CDC123   | 694239    |
| Cell division cycle 14A                           | CDC14A   | 716475    |
| Cell division cycle 16                            | CDC16    | 699089    |
| Cell division cycle 23                            | CDC23    | 714000    |
| Cell division cycle 25C                           | CDC25C   | 714115    |
| Cell division cycle 26                            | CDC26    | 706165    |
| Cell division cycle 37                            | CDC37    | 715390    |
| Cell division cycle 5 like                        | CDC5L    | 703099    |
| Cell division cycle 7                             | CDC7     | 704730    |
| Cell division cycle and apoptosis regulator 1     | CCAR1    | 693585    |
| Cell division cycle associated 3                  | CDCA3    | 722088    |
| Cell division cycle associated 5                  | CDCA5    | 721998    |
| Cell division cycle associated 7                  | CDCA7    | 696474    |

|                                                         |            |           |
|---------------------------------------------------------|------------|-----------|
| Cell division cycle associated 8                        | CDCA8      | 719808    |
| Cell growth regulator with ring finger domain 1         | CGRRF1     | 695231    |
| Centrin 2                                               | CETN2      | 693376    |
| Centrin 3                                               | CETN3      | 695223    |
| Centriolin                                              | CNTRL      | 700200    |
| Centromere protein C                                    | CENPC      | 710620    |
| Centromere protein F                                    | CENPF      | 709000    |
| Centromere protein J                                    | CENPJ      | 721498    |
| Centrosomal protein 192kda                              | CEP192     | 722121    |
| Centrosomal protein 290kda                              | CEP290     | 708286    |
| Centrosomal protein 41kda                               | CEP41      | 703215    |
| Centrosomal protein 57kda-like 1                        | CEP57L1    | 700109    |
| Centrosomal protein 72kda                               | CEP72      | 708753    |
| Centrosomal protein 83kda                               | CEP83      | 711408    |
| Ceramide synthase 2                                     | CERS2      | 716180    |
| Cerebellar degeneration related protein 2               | CDR2       | 698974    |
| Cerebellar degeneration-related protein 2-like          | CDR2L      | 700082    |
| CGG triplet repeat binding protein 1                    | CGGBP1     | 693920    |
| Chaperonin containing TCP1, subunit 2 (beta)            | CCT2       | 717182    |
| Chaperonin containing TCP1, subunit 5 (epsilon)         | CCT5       | 696640    |
| Chaperonin containing TCP1, subunit 8 (theta)           | CCT8       | 706184    |
| Charged multivesicular body protein 2A                  | CHMP2A     | 712059    |
| Charged multivesicular body protein 4B                  | CHMP4B     | 709004    |
| Charged multivesicular body protein 5                   | CHMP5      | 703191    |
| Checkpoint kinase 2                                     | CHEK2      | 713668    |
| Chemokine (C-C motif) ligand 27                         | CCL27      | 574220    |
| Chemokine (C-C motif) receptor 7                        | CCR7       | 574231    |
| Chemokine (C-X-C motif) receptor 4                      | CXCR4      | 707329    |
| Chemokine-like factor                                   | CKLF       | 693673    |
| Chimerin 2                                              | CHN2       | 697231    |
| Chitinase domain containing 1                           | CHID1      | 701435    |
| Chloride intracellular channel 3                        | CLIC3      | 721634    |
| Chloride intracellular channel 4                        | CLIC4      | 712337    |
| Choline/ethanolamine phosphotransferase 1               | CEPT1      | 702700    |
| Cholinergic receptor, muscarinic 4                      | CHRM4      | 574195    |
| Cholinergic receptor, nicotinic alpha 10                | CHRNA10    | 718133    |
| Cholinergic receptor, nicotinic beta 2                  | CHRNA2     | 716830    |
| Cholinergic receptor, nicotinic gamma                   | CHRNA3     | 713418    |
| Chondroitin sulfate N-acetylgalactosaminyltransferase 2 | CSGALNACT2 | 703703    |
| Chromatin target of PRMT1                               | CHTOP      | 715501    |
| Chromobox 1                                             | CBX1       | 696673    |
| Chromodomain helicase DNA binding protein 1             | CHD1       | 702070    |
| Chromogranin B                                          | CHGB       | 719171    |
| Chromosome 1 open reading frame, human c1orf123         | C1H1orf123 | 714201    |
| Chromosome 1 open reading frame, human c1orf198         | C1H1orf198 | 714084    |
| Chromosome 1 open reading frame, human c1orf50          | C1H1orf50  | 698058    |
| Chromosome 1 open reading frame, human c1orf52          | C1H1orf52  | 711232    |
| Chromosome 1 open reading frame, human c1orf54          | C1H1orf54  | 107000832 |

|                                                    |             |        |
|----------------------------------------------------|-------------|--------|
| Chromosome 1 open reading frame, human c1orf74     | C1H1orf74   | 713029 |
| Chromosome 10 open reading frame, human c20orf27   | C10H20orf27 | 717525 |
| Chromosome 11 open reading frame, human c12orf4    | C11H12orf4  | 710836 |
| Chromosome 12 open reading frame, human c2orf47    | C12H2orf47  | 699322 |
| Chromosome 14 open reading frame, human c11orf68   | C14H11orf68 | 715318 |
| Chromosome 14 open reading frame, human c11orf73   | C14H11orf73 | 704098 |
| Chromosome 16 open reading frame, human c17orf62   | C16H17orf62 | 716212 |
| Chromosome 16 open reading frame, human c17orf74   | C16H17orf74 | 721838 |
| Chromosome 18 open reading frame, human c18orf21   | C18H18orf21 | 715440 |
| Chromosome 19 open reading frame, human c19orf53   | C19H19orf53 | 720745 |
| Chromosome 2 open reading frame, human c3orf18     | C2H3orf18   | 701675 |
| Chromosome 2 open reading frame, human c3orf58     | C2H3orf58   | 713830 |
| Chromosome 2 open reading frame, human c3orf67     | C2H3orf67   | 705402 |
| Chromosome 20 open reading frame 24 ortholog       | C10H20orf24 | 709696 |
| Chromosome 20 open reading frame, human c16orf13   | C20H16orf13 | 696495 |
| Chromosome 20 open reading frame, human c16orf54   | C20H16orf54 | 706285 |
| Chromosome 20 open reading frame, human c16orf78   | C20H16orf78 | 693672 |
| Chromosome 20 open reading frame, human c16orf82   | C20H16orf82 | 702965 |
| Chromosome 3 open reading frame, human c21orf91    | C3H21orf91  | 710406 |
| Chromosome 3 open reading frame, human c7orf25     | C3H7orf25   | 708455 |
| Chromosome 4 open reading frame, human c6orf1      | C4H6orf1    | 718551 |
| Chromosome 4 open reading frame, human c6orf136    | C4H6orf136  | 712108 |
| Chromosome 4 open reading frame, human c6orf203    | C4H6orf203  | 698108 |
| Chromosome 4 open reading frame, human c6orf89     | C4H6orf89   | 719165 |
| Chromosome 5 open reading frame, human c4orf27     | C5H4orf27   | 694607 |
| Chromosome 7 open reading frame, human c14orf142   | C7H14orf142 | 704509 |
| Chromosome 7 open reading frame, human c14orf166   | C7H14orf166 | 710094 |
| Chromosome 7 open reading frame, human c14orf37    | C7H14orf37  | 699880 |
| Chromosome 8 open reading frame, human c8orf59     | C8H8orf59   | 703464 |
| Chromosome 8 open reading frame, human c8orf76     | C8H8orf76   | 704150 |
| Chromosome 9 open reading frame, human c10orf2     | C9H10orf2   | 710958 |
| Chromosome 9 open reading frame, human c10orf62    | C9H10orf62  | 706769 |
| Chromosome 9 open reading frame, human c10orf82    | C9H10orf82  | 707098 |
| Chromosome X open reading frame, human cxorf23     | CXHXorf23   | 696449 |
| Chymotrypsin-like                                  | CTRL        | 701625 |
| Cilia and flagella associated protein 43           | CFAP43      | 716031 |
| Cilia and flagella associated protein 65           | CFAP65      | 701296 |
| Ciliary neurotrophic factor                        | CNTF        | 701907 |
| Circadian associated repressor of transcription    | CIART       | 706693 |
| Citrate lyase beta like                            | CLYBL       | 699339 |
| CKLF-like MARVEL transmembrane domain containing 8 | CMTM8       | 704234 |
| Clathrin, light chain A                            | CLTA        | 693659 |
| Claudin 12                                         | CLDN12      | 704058 |
| Claudin 15                                         | CLDN15      | 719637 |
| Claudin 3                                          | CLDN3       | 716771 |
| Claudin 9                                          | CLDN9       | 699721 |
| Cleavage and polyadenylation factor I subunit 1    | CLP1        | 705071 |
| Cleavage and polyadenylation specific factor 4     | CPSF4       | 708119 |

|                                                          |         |        |
|----------------------------------------------------------|---------|--------|
| Cleavage stimulation factor, 3' pre-RNA, subunit 2       | CSTF2   | 701235 |
| Cleavage stimulation factor, 3' pre-RNA, subunit 3       | CSTF3   | 694040 |
| Cleft lip and palate associated transmembrane protein 1  | CLPTM1  | 718306 |
| CLK4-associating serine/arginine rich protein            | CLASRP  | 713561 |
| Cms1 ribosomal small subunit homolog (yeast)             | CMSS1   | 699717 |
| Coagulation factor II (thrombin) receptor                | F2R     | 707370 |
| Coatomer protein complex subunit beta 1                  | COPB1   | 699327 |
| Coatomer protein complex subunit zeta 1                  | COPZ1   | 705176 |
| Codanin 1                                                | CDAN1   | 708838 |
| Coenzyme Q10A                                            | COQ10A  | 712341 |
| Coenzyme Q2 4-hydroxybenzoate polyprenyltransferase      | COQ2    | 707681 |
| Cofilin 1 (non-muscle)                                   | CFL1    | 721882 |
| Cofilin 2 (muscle)                                       | CFL2    | 693875 |
| Coiled-coil domain containing 12                         | CCDC12  | 712061 |
| Coiled-coil domain containing 174                        | CCDC174 | 701654 |
| Coiled-coil domain containing 181                        | CCDC181 | 700803 |
| Coiled-coil domain containing 27                         | CCDC27  | 695384 |
| Coiled-coil domain containing 28A                        | CCDC28A | 703104 |
| Coiled-coil domain containing 3                          | CCDC3   | 694884 |
| Coiled-coil domain containing 36                         | CCDC36  | 707136 |
| Coiled-coil domain containing 43                         | CCDC43  | 715325 |
| Coiled-coil domain containing 59                         | CCDC59  | 698443 |
| Coiled-coil domain containing 84                         | CCDC84  | 707400 |
| Coiled-coil domain containing 92                         | CCDC92  | 705922 |
| Coiled-coil domain containing 97                         | CCDC97  | 706342 |
| Coiled-coil serine rich protein 2                        | CCSER2  | 698006 |
| Coiled-coil-helix-coiled-coil-helix domain containing 10 | CHCHD10 | 720205 |
| Coiled-coil-helix-coiled-coil-helix domain containing 6  | CHCHD6  | 716767 |
| Coiled-coil-helix-coiled-coil-helix domain containing 8  | CHCHD8  | 718275 |
| Cold shock domain containing E1, RNA binding             | CSDE1   | 708897 |
| Collagen, type III, alpha 1                              | COL3A1  | 574131 |
| Collagen, type VI, alpha 3                               | COL6A3  | 694701 |
| Collagen, type XII, alpha 1                              | COL12A1 | 717820 |
| Collapsin response mediator protein 1                    | CRMP1   | 711349 |
| COMM domain containing 2                                 | COMMD2  | 711498 |
| COMM domain containing 6                                 | COMMD6  | 695191 |
| Complement component 1, q subcomponent binding protein   | C1QBP   | 711817 |
| Complement component 1, q subcomponent-like 1            | C1QL1   | 715801 |
| Complement component 5a receptor 1                       | C5AR1   | 718056 |
| Complement factor properdin                              | CFP     | 707386 |
| Component of oligomeric golgi complex 1                  | COG1    | 695754 |
| Component of oligomeric golgi complex 4                  | COG4    | 712103 |
| Conserved helix-loop-helix ubiquitous kinase             | CHUK    | 709511 |
| Contactin 1                                              | CNTN1   | 574365 |
| Coordinator of PRMT5, differentiation stimulator         | COPRS   | 713293 |
| COP9 signalosome subunit 2                               | COPS2   | 714814 |
| COP9 signalosome subunit 3                               | COPS3   | 698461 |
| COP9 signalosome subunit 4                               | COPS4   | 693435 |

|                                                                          |         |        |
|--------------------------------------------------------------------------|---------|--------|
| COP9 signalosome subunit 5                                               | COPS5   | 704584 |
| COP9 signalosome subunit 6                                               | COPS6   | 710667 |
| Copine II                                                                | CPNE2   | 703557 |
| Core-binding factor, beta subunit                                        | CBFB    | 695767 |
| Core-binding factor, runt domain, alpha subunit 2;<br>translocated to, 3 | CBFA2T3 | 698233 |
| Cornichon family AMPA receptor auxiliary protein 1                       | CNIH1   | 695002 |
| Cornichon family AMPA receptor auxiliary protein 4                       | CNIH4   | 701767 |
| Coronin, actin binding protein, 1B                                       | CORO1B  | 721725 |
| Cortactin                                                                | CTTN    | 708291 |
| Cryptochrome circadian clock 1                                           | CRY1    | 703752 |
| Crystallin beta B3                                                       | CRYBB3  | 711554 |
| CSE1 chromosome segregation 1-like (yeast)                               | CSE1L   | 704301 |
| C-src tyrosine kinase                                                    | CSK     | 702868 |
| CTD phosphatase subunit 1                                                | CTDP1   | 698467 |
| CTD small phosphatase like 2                                             | CTDSPL2 | 711917 |
| C-terminal binding protein 1                                             | CTBP1   | 694507 |
| CTP synthase 1                                                           | CTPS1   | 695498 |
| CTR9 homolog, Paf1/RNA polymerase II complex component                   | CTR9    | 705748 |
| C-type lectin domain family 1, member A                                  | CLEC1A  | 717526 |
| C-type lectin domain family 4 member A                                   | CLEC4A  | 716122 |
| C-type lectin domain family 9 member A                                   | CLEC9A  | 717472 |
| CUE domain containing 2                                                  | CUEDC2  | 713243 |
| CUGBP, Elav-like family member 3                                         | CELF3   | 716884 |
| Cullin 4A                                                                | CUL4A   | 714302 |
| Cullin 7                                                                 | CUL7    | 699545 |
| Cutc copper transporter                                                  | CUTC    | 709050 |
| CWC15 spliceosome-associated protein                                     | CWC15   | 698332 |
| CWF19-like 2, cell cycle control (S. Pombe)                              | CWF19L2 | 706825 |
| C-x(9)-C motif containing 1                                              | CMC1    | 705147 |
| Cyclic nucleotide binding domain containing 2                            | CNBD2   | 703290 |
| Cyclin A2                                                                | CCNA2   | 707259 |
| Cyclin and CBS domain divalent metal cation transport<br>mediator 2      | CNNM2   | 714238 |
| Cyclin B2                                                                | CCNB2   | 702184 |
| Cyclin D3                                                                | CCND3   | 695215 |
| Cyclin D-type binding-protein 1                                          | CCNDBP1 | 709589 |
| Cyclin E1                                                                | CCNE1   | 700589 |
| Cyclin G1                                                                | CCNG1   | 697738 |
| Cyclin H                                                                 | CCNH    | 694224 |
| Cyclin I                                                                 | CCNI    | 677687 |
| Cyclin T1                                                                | CCNT1   | 707754 |
| Cyclin T2                                                                | CCNT2   | 708813 |
| Cyclin-dependent kinase 1                                                | CDK1    | 699269 |
| Cyclin-dependent kinase 12                                               | CDK12   | 696733 |
| Cyclin-dependent kinase 14                                               | CDK14   | 703442 |
| Cyclin-dependent kinase 17                                               | CDK17   | 717183 |
| Cyclin-dependent kinase 2                                                | CDK2    | 711002 |

|                                                              |         |           |
|--------------------------------------------------------------|---------|-----------|
| Cyclin-dependent kinase 4                                    | CDK4    | 715650    |
| Cyclin-dependent kinase 9                                    | CDK9    | 699840    |
| Cyclin-dependent kinase inhibitor 2C (p18, inhibits CDK4)    | CDKN2C  | 711877    |
| Cyclin-dependent kinase inhibitor 2D (p19, inhibits CDK4)    | CDKN2D  | 713172    |
| Cystatin C                                                   | CST3    | 574313    |
| Cysteine conjugate-beta lyase, cytoplasmic                   | CCBL1   | 717142    |
| Cysteine/histidine-rich 1                                    | CYHR1   | 702522    |
| CysteinyI-trna synthetase                                    | CARS    | 706502    |
| CysteinyI-trna synthetase 2, mitochondrial (putative)        | CARS2   | 694840    |
| Cytidine monophosphate (UMP-CMP) kinase 1, cytosolic         | CMPK1   | 710196    |
| Cytidine monophosphate N-acetylneuraminic acid synthetase    | CMAS    | 706604    |
| Cytochrome b-245 heavy chain                                 | CYBB    | 696542    |
| Cytochrome b5 domain containing 2                            | CYB5D2  | 708196    |
| Cytochrome c oxidase subunit 5A                              | COX5A   | 692061    |
| Cytochrome c oxidase subunit 6C                              | COX6C   | 100428416 |
| Cytochrome c oxidase subunit IV isoform 1                    | COX4I1  | 693811    |
| Cytochrome c oxidase subunit via polypeptide 2               | COX6A2  | 713995    |
| Cytochrome c oxidase subunit viic                            | COX7C   | 100429280 |
| Cytochrome c-1                                               | CYC1    | 700518    |
| Cytochrome P450, family 2, subfamily D, polypeptide 6        | CYP2D6  | 678691    |
| Cytochrome P450, family 2, subfamily F, polypeptide 6        | CYP2F1  | 678696    |
| Cytochrome P450, family 21, subfamily A, polypeptide 2       | CYP21A2 | 717020    |
| Cytochrome P450c17                                           | CYP17A1 | 678693    |
| Cytoplasmic polyadenylation element binding protein 2        | CPEB2   | 722844    |
| Cytoskeleton associated protein 2 like                       | CKAP2L  | 704381    |
| Cytoskeleton associated protein 5                            | CKAP5   | 714095    |
| Cytosolic thiouridylase subunit 1                            | CTU1    | 719536    |
| Cytotoxic and regulatory T-cell molecule                     | CRTAM   | 707560    |
| Dachshund family transcription factor 1                      | DACH1   | 693532    |
| Dachsous cadherin-related 1                                  | DCHS1   | 711938    |
| DALR anticodon binding domain containing 3                   | DALRD3  | 708403    |
| DCN1, defective in cullin neddylation 1, domain containing 1 | DCUN1D1 | 708357    |
| DCN1, defective in cullin neddylation 1, domain containing 4 | DCUN1D4 | 702908    |
| DCN1, defective in cullin neddylation 1, domain containing 5 | DCUN1D5 | 704099    |
| DC-STAMP domain containing 2                                 | DCST2   | 717224    |
| DDB1 and CUL4 associated factor 11                           | DCAF11  | 714867    |
| DDB1 and CUL4 associated factor 4                            | DCAF4   | 695337    |
| DDB1 and CUL4 associated factor 6                            | DCAF6   | 698686    |
| D-dopachrome tautomerase                                     | DDT     | 699933    |
| DEAD (Asp-Glu-Ala-Asp) box helicase 1                        | DDX1    | 698327    |
| DEAD (Asp-Glu-Ala-Asp) box helicase 5                        | DDX5    | 677694    |
| DEAD (Asp-Glu-Ala-Asp) box polypeptide 27                    | DDX27   | 703852    |
| DEAD (Asp-Glu-Ala-Asp) box polypeptide 39A                   | DDX39A  | 718822    |
| DEAD (Asp-Glu-Ala-Asp) box polypeptide 41                    | DDX41   | 700742    |
| DEAD (Asp-Glu-Ala-Asp) box polypeptide 54                    | DDX54   | 712763    |
| DEAD/H (Asp-Glu-Ala-Asp/His) box polypeptide 26B             | DDX26B  | 709688    |
| Deafness, autosomal recessive 31                             | DFNB31  | 708051    |
| DEAH (Asp-Glu-Ala-His) box helicase 15                       | DHX15   | 715852    |

|                                                               |          |           |
|---------------------------------------------------------------|----------|-----------|
| DEAH (Asp-Glu-Ala-His) box helicase 30                        | DHX30    | 711178    |
| DEAH (Asp-Glu-Ala-His) box helicase 9                         | DHX9     | 715453    |
| DEAH (Asp-Glu-Ala-His) box polypeptide 29                     | DHX29    | 706306    |
| DEAH (Asp-Glu-Ala-His) box polypeptide 38                     | DHX38    | 709173    |
| Death associated protein 3                                    | DAP3     | 719314    |
| Death inducer-obliterator 1                                   | DIDO1    | 698313    |
| Decapping exoribonuclease                                     | DXO      | 716027    |
| Decapping mrna 1B                                             | DCP1B    | 708089    |
| Dedicator of cytokinesis 5                                    | DOCK5    | 711359    |
| Defender against cell death 1                                 | DAD1     | 711840    |
| Defensin beta 108B                                            | DEFB108B | 696933    |
| Defensin beta 118                                             | DEFB118  | 641438    |
| Dehydrodolichyl diphosphate synthase subunit                  | DHDDS    | 714635    |
| Dehydrogenase/reductase (SDR family) member 1                 | DHRS1    | 715933    |
| Dehydrogenase/reductase (SDR family) member 3                 | DHRS3    | 715548    |
| Deiodinase, iodothyronine, type II                            | DIO2     | 707484    |
| DEK proto-oncogene                                            | DEK      | 712460    |
| Delta-like 1 homolog (Drosophila)                             | DLK1     | 707595    |
| Delta-like 4 (Drosophila)                                     | DLL4     | 704898    |
| Deltex 3, E3 ubiquitin ligase                                 | DTX3     | 715175    |
| DENN/MADD domain containing 5A                                | DENND5A  | 707945    |
| Denticleless E3 ubiquitin protein ligase homolog (Drosophila) | DTL      | 711236    |
| Deoxyguanosine kinase                                         | DGUOK    | 707554    |
| Deoxyhypusine synthase                                        | DHPS     | 716213    |
| Deoxythymidylate kinase                                       | DTYMK    | 701781    |
| Derlin 1                                                      | DERL1    | 703803    |
| Derlin 2                                                      | DERL2    | 712051    |
| Dermatan sulfate epimerase                                    | DSE      | 716054    |
| Desmoplakin                                                   | DSP      | 694860    |
| Desumoylating isopeptidase 2                                  | DESI2    | 713515    |
| Developmentally regulated GTP binding protein 1               | DRG1     | 716791    |
| Dexi homolog (mouse)                                          | DEXI     | 100430904 |
| Dicer 1, ribonuclease type III                                | DICER1   | 702516    |
| Dickkopf WNT signaling pathway inhibitor 3                    | DKK3     | 701549    |
| Dickkopf-like 1                                               | DKKL1    | 718731    |
| Dihydrolipoamide S-acetyltransferase                          | DLAT     | 710930    |
| Dihydropyrimidinase like 3                                    | DPYSL3   | 708425    |
| Dihydrouridine synthase 3-like                                | DUS3L    | 719524    |
| Dimethylarginine dimethylaminohydrolase 1                     | DDAH1    | 711395    |
| Dipeptidase 3                                                 | DPEP3    | 701327    |
| Dipeptidyl-peptidase 8                                        | DPP8     | 709428    |
| Diphosphoinositol pentakisphosphate kinase 2                  | PIP5K2   | 703458    |
| Discoidin domain receptor tyrosine kinase 1                   | DDR1     | 714233    |
| Discoidin domain receptor tyrosine kinase 2                   | DDR2     | 720124    |
| Discs, large homolog 1 (Drosophila)                           | DLG1     | 709572    |
| Discs, large homolog 5 (Drosophila)                           | DLG5     | 703123    |
| Dishevelled segment polarity protein 1                        | DVL1     | 705864    |
| Dispatched homolog 1 (Drosophila)                             | DISP1    | 703960    |



|                                                                             |         |        |
|-----------------------------------------------------------------------------|---------|--------|
| Distal-less homeobox 5                                                      | DLX5    | 697853 |
| DNA (cytosine-5-)-methyltransferase 1                                       | DNMT1   | 574321 |
| DNA cross-link repair 1B                                                    | DCLRE1B | 707742 |
| Dnaj heat shock protein family (Hsp40) member A1                            | DNAJA1  | 703765 |
| Dnaj heat shock protein family (Hsp40) member B1                            | DNAJB1  | 718890 |
| Dnaj heat shock protein family (Hsp40) member B5                            | DNAJB5  | 699081 |
| Dnaj heat shock protein family (Hsp40) member C1                            | DNAJC1  | 704151 |
| Dnaj heat shock protein family (Hsp40) member C12                           | DNAJC12 | 695795 |
| Dnaj heat shock protein family (Hsp40) member C22                           | DNAJC22 | 710205 |
| Dnaj heat shock protein family (Hsp40) member C27                           | DNAJC27 | 694037 |
| Dnaj heat shock protein family (Hsp40) member C3                            | DNAJC3  | 695757 |
| Dnaj heat shock protein family (Hsp40) member C5 beta                       | DNAJC5B | 702408 |
| Dnaj heat shock protein family (Hsp40) member C8                            | DNAJC8  | 720231 |
| Dnaj heat shock protein family (Hsp40) member C9                            | DNAJC9  | 707599 |
| Docking protein 4                                                           | DOK4    | 704443 |
| Docking protein 5                                                           | DOK5    | 698689 |
| Dolichol kinase                                                             | DOLK    | 717045 |
| Dolichyl-phosphate mannosyltransferase polypeptide 2,<br>regulatory subunit | DPM2    | 698709 |
| Double C2-like domains, alpha                                               | DOC2A   | 707895 |
| Double zinc ribbon and ankyrin repeat domains 1                             | DZANK1  | 700143 |
| DR1-associated protein 1 (negative cofactor 2 alpha)                        | DRAP1   | 715271 |
| Drosha, ribonuclease type III                                               | DROSHA  | 692081 |
| DTW domain containing 1                                                     | DTWD1   | 715084 |
| D-tyrosyl-trna deacylase 1                                                  | DTD1    | 700895 |
| Dual serine/threonine and tyrosine protein kinase                           | DSTYK   | 664732 |
| Dual specificity phosphatase 11                                             | DUSP11  | 707123 |
| Dual specificity phosphatase 12                                             | DUSP12  | 720034 |
| Dual specificity phosphatase 14                                             | DUSP14  | 714383 |
| Dual specificity phosphatase 23                                             | DUSP23  | 719474 |
| Dual specificity phosphatase 26 (putative)                                  | DUSP26  | 697134 |
| Dual specificity phosphatase 6                                              | DUSP6   | 708907 |
| Dual specificity tyrosine-(Y)-phosphorylation regulated kinase 3            | DYRK3   | 695163 |
| Dynactin subunit 1                                                          | DCTN1   | 708290 |
| Dynactin subunit 2                                                          | DCTN2   | 714948 |
| Dynactin subunit 6                                                          | DCTN6   | 694273 |
| Dynamin 1-like                                                              | DNM1L   | 695388 |
| Dynein, axonemal, assembly factor 2                                         | DNAAF2  | 719026 |
| Dynein, light chain, LC8-type 1                                             | DYNLL1  | 702360 |
| Dynein, light chain, roadblock-type 2                                       | DYNLRB2 | 713503 |
| E1A binding protein p300                                                    | EP300   | 706258 |
| E2F transcription factor 1                                                  | E2F1    | 714126 |
| E2F transcription factor 3                                                  | E2F3    | 713904 |
| E2F transcription factor 4, p107/p130-binding                               | E2F4    | 696864 |
| E2F transcription factor 5, p130-binding                                    | E2F5    | 703352 |
| E2F-associated phosphoprotein                                               | EAPP    | 714727 |
| E74-like factor 2 (ets domain transcription factor)                         | ELF2    | 696760 |
| E74-like factor 5 (ets domain transcription factor)                         | ELF5    | 717377 |

|                                                           |         |        |
|-----------------------------------------------------------|---------|--------|
| Ecdysoneless homolog (Drosophila)                         | ECD     | 707699 |
| Ectodermal-neural cortex 1 (with BTB domain)              | ENC1    | 704577 |
| Ectodysplasin A receptor                                  | EDAR    | 695059 |
| Ectonucleoside triphosphate diphosphohydrolase 8          | ENTPD8  | 704424 |
| Ectonucleotide pyrophosphatase/phosphodiesterase 1        | ENPP1   | 710140 |
| Ectonucleotide pyrophosphatase/phosphodiesterase 2        | ENPP2   | 705287 |
| Ectonucleotide pyrophosphatase/phosphodiesterase 3        | ENPP3   | 710232 |
| EF-hand calcium binding domain 7                          | EFCAB7  | 696830 |
| EF-hand domain family member D2                           | EFHD2   | 694155 |
| EGF-like, fibronectin type III and laminin G domains      | EGFLAM  | 693314 |
| EGF-like-domain, multiple 7                               | EGFL7   | 709840 |
| EGF-like-domain, multiple 8                               | EGFL8   | 717145 |
| Egl-9 family hypoxia-inducible factor 2                   | EGLN2   | 703083 |
| EH domain binding protein 1                               | EHBP1   | 693902 |
| EH domain containing 1                                    | EHD1    | 722036 |
| Elastin microfibril interfacer 3                          | EMILIN3 | 696465 |
| Electron-transferring-flavoprotein dehydrogenase          | ETFDH   | 701207 |
| ELMO/CED-12 domain containing 2                           | ELMOD2  | 698742 |
| ELOVL fatty acid elongase 1                               | ELOVL1  | 700557 |
| ELOVL fatty acid elongase 4                               | ELOVL4  | 692070 |
| Embryonic ectoderm development                            | EED     | 703866 |
| Emopamil binding protein (sterol isomerase)               | EBP     | 714315 |
| Endonuclease G                                            | ENDOG   | 717171 |
| Endoplasmic reticulum lectin 1                            | ERLEC1  | 716460 |
| Endothelial cell adhesion molecule                        | ESAM    | 712200 |
| Endothelin 3                                              | EDN3    | 693385 |
| Enhancer of rudimentary homolog (Drosophila)              | ERH     | 712507 |
| Enhancer of yellow 2 homolog (Drosophila)                 | ENY2    | 699048 |
| Enhancer of zeste 1 polycomb repressive complex 2 subunit | EZH1    | 711173 |
| Enolase 1, (alpha)                                        | ENO1    | 709378 |
| Enoyl-coa delta isomerase 2                               | ECI2    | 709579 |
| Eomesodermin                                              | EOMES   | 704711 |
| EPH receptor A1                                           | EPHA1   | 706295 |
| EPH receptor B6                                           | EPHB6   | 704886 |
| Epididymal protein 3A                                     | EDDM3A  | 704355 |
| Epithelial cell transforming 2                            | ECT2    | 694056 |
| Epithelial stromal interaction 1 (breast)                 | EPSTI1  | 700208 |
| ER degradation enhancer, mannosidase alpha-like 3         | EDEM3   | 714475 |
| ER lipid raft associated 2                                | ERLIN2  | 698126 |
| ER membrane protein complex subunit 1                     | EMC1    | 702573 |
| ER membrane protein complex subunit 10                    | EMC10   | 719285 |
| ER membrane protein complex subunit 4                     | EMC4    | 695907 |
| ER membrane protein complex subunit 6                     | EMC6    | 707030 |
| ErbB2 interacting protein                                 | ERBB2IP | 700429 |
| ERGIC and golgi 3                                         | ERGIC3  | 704736 |
| ESF1 nucleolar pre-rRNA processing protein homolog        | ESF1    | 694159 |
| Esterase D                                                | ESD     | 708871 |
| Ethanolamine-phosphate phospho-lyase                      | ETNPPL  | 696880 |

|                                                               |          |           |
|---------------------------------------------------------------|----------|-----------|
| Eukaryotic translation elongation factor 1 beta 2             | EEF1B2   | 707019    |
| Eukaryotic translation elongation factor 1 epsilon 1          | EEF1E1   | 695426    |
| Eukaryotic translation elongation factor 1 gamma              | EEF1G    | 722274    |
| Eukaryotic translation initiation factor 2 subunit beta       | EIF2S2   | 708593    |
| Eukaryotic translation initiation factor 2-alpha kinase 3     | EIF2AK3  | 699575    |
| Eukaryotic translation initiation factor 2D                   | EIF2D    | 695274    |
| Eukaryotic translation initiation factor 3 subunit D          | EIF3D    | 695051    |
| Eukaryotic translation initiation factor 3 subunit E          | EIF3E    | 697622    |
| Eukaryotic translation initiation factor 3 subunit H          | EIF3H    | 700517    |
| Eukaryotic translation initiation factor 3 subunit K          | EIF3K    | 693536    |
| Eukaryotic translation initiation factor 3 subunit L          | EIF3L    | 699189    |
| Eukaryotic translation initiation factor 3 subunit M          | EIF3M    | 695698    |
| Eukaryotic translation initiation factor 4A2                  | EIF4A2   | 707775    |
| Eukaryotic translation initiation factor 4A3                  | EIF4A3   | 712141    |
| Eukaryotic translation initiation factor 4E binding protein 2 | EIF4EBP2 | 100424760 |
| Eukaryotic translation initiation factor 4E binding protein 3 | EIF4EBP3 | 100532736 |
| Eukaryotic translation initiation factor 4E family member 2   | EIF4E2   | 713487    |
| Eukaryotic translation initiation factor 4H                   | EIF4H    | 693429    |
| Eukaryotic translation termination factor 1                   | ETF1     | 714449    |
| Eva-1 homolog B (C. Elegans)                                  | EVA1B    | 713159    |
| Even-skipped homeobox 1                                       | EVX1     | 699106    |
| EWS RNA binding protein 1                                     | EWSR1    | 714432    |
| Excision repair cross-complementation group 3                 | ERCC3    | 698829    |
| Exocyst complex component 1                                   | EXOC1    | 695664    |
| Exocyst complex component 2                                   | EXOC2    | 706296    |
| Exocyst complex component 4                                   | EXOC4    | 712458    |
| Exocyst complex component 7                                   | EXOC7    | 705801    |
| Exophilin 5                                                   | EXPH5    | 708977    |
| Exosome component 10                                          | EXOSC10  | 714153    |
| Exosome component 3                                           | EXOSC3   | 716347    |
| Exostosin glycosyltransferase 1                               | EXT1     | 701488    |
| Exostosin glycosyltransferase 2                               | EXT2     | 715975    |
| Exportin 1                                                    | XPO1     | 718063    |
| Exportin 5                                                    | XPO5     | 700664    |
| Exportin 6                                                    | XPO6     | 704332    |
| Extended synaptotagmin-like protein 1                         | ESYT1    | 711720    |
| Extra spindle pole bodies like 1, separase                    | ESPL1    | 702136    |
| F11 receptor                                                  | F11R     | 719824    |
| Family with sequence similarity 104 member A                  | FAM104A  | 695865    |
| Family with sequence similarity 110 member B                  | FAM110B  | 703840    |
| Family with sequence similarity 117 member A                  | FAM117A  | 700079    |
| Family with sequence similarity 126 member A                  | FAM126A  | 705467    |
| Family with sequence similarity 129 member B                  | FAM129B  | 707403    |
| Family with sequence similarity 13 member C                   | FAM13C   | 702439    |
| Family with sequence similarity 156 member B                  | FAM156B  | 698392    |
| Family with sequence similarity 160 member A2                 | FAM160A2 | 711641    |
| Family with sequence similarity 171 member B                  | FAM171B  | 712442    |
| Family with sequence similarity 175 member B                  | FAM175B  | 694886    |

|                                                        |         |        |
|--------------------------------------------------------|---------|--------|
| Family with sequence similarity 178 member B           | FAM178B | 710890 |
| Family with sequence similarity 179 member B           | FAM179B | 702188 |
| Family with sequence similarity 181 member B           | FAM181B | 701184 |
| Family with sequence similarity 20 member A            | FAM20A  | 718937 |
| Family with sequence similarity 212 member A           | FAM212A | 704983 |
| Family with sequence similarity 219 member A           | FAM219A | 700651 |
| Family with sequence similarity 220 member A           | FAM220A | 703785 |
| Family with sequence similarity 35 member A            | FAM35A  | 694102 |
| Family with sequence similarity 43 member B            | FAM43B  | 705659 |
| Family with sequence similarity 58 member A            | FAM58A  | 695925 |
| Family with sequence similarity 71 member D            | FAM71D  | 713472 |
| Family with sequence similarity 76 member B            | FAM76B  | 699581 |
| Family with sequence similarity 8 member A1            | FAM8A1  | 703789 |
| Family with sequence similarity 92 member A1           | FAM92A1 | 698794 |
| Fanconi anemia complementation group E                 | FANCE   | 718889 |
| Fanconi anemia complementation group F                 | FANCF   | 704048 |
| Farnesyl-diphosphate farnesyltransferase 1             | FDFT1   | 696396 |
| Farnesyltransferase, CAAX box, beta                    | FNTB    | 708129 |
| Fas apoptotic inhibitory molecule                      | FAIM    | 716216 |
| Fas ligand (TNF superfamily, member 6)                 | FASLG   | 574159 |
| Fasciculation and elongation protein zeta 1            | FEZ1    | 713106 |
| Fasciculation and elongation protein zeta 2 (zygin II) | FEZ2    | 708288 |
| Fascin actin-bundling protein 2, retinal               | FSCN2   | 713824 |
| FAST kinase domains 1                                  | FASTKD1 | 706154 |
| Fat storage-inducing transmembrane protein 1           | FITM1   | 715085 |
| Fatty acid binding protein 6, ileal                    | FABP6   | 695439 |
| Fatty acid binding protein 7, brain                    | FABP7   | 713762 |
| Fatty acyl coa reductase 1                             | FAR1    | 699947 |
| FBJ murine osteosarcoma viral oncogene homolog         | FOS     | 702077 |
| F-box and leucine-rich repeat protein 6                | FBXL6   | 701594 |
| F-box and WD repeat domain containing 4                | FBXW4   | 711996 |
| F-box and WD repeat domain containing 7                | FBXW7   | 695101 |
| F-box protein 11                                       | FBXO11  | 715651 |
| F-box protein 4                                        | FBXO4   | 697007 |
| FCH and double SH3 domains 2                           | FCHSD2  | 717996 |
| Feline leukemia virus subgroup C cellular receptor 1   | FLVCR1  | 710008 |
| Fem-1 homolog b (C. Elegans)                           | FEM1B   | 693955 |
| FERM domain containing 3                               | FRMD3   | 713394 |
| Fermitin family member 3                               | FERMT3  | 722120 |
| Fetal and adult testis expressed 1                     | FATE1   | 704368 |
| FEV (ETS oncogene family)                              | FEV     | 701065 |
| FGR proto-oncogene, Src family tyrosine kinase         | FGR     | 716296 |
| Fibrillarin                                            | FBL     | 700286 |
| Fibrinogen-like 2                                      | FGL2    | 694856 |
| Fibroblast activation protein alpha                    | FAP     | 701541 |
| Fibroblast growth factor 13                            | FGF13   | 695460 |
| Fibroblast growth factor 16                            | FGF16   | 705612 |
| Fibroblast growth factor 17                            | FGF17   | 706659 |

|                                                                                |         |        |
|--------------------------------------------------------------------------------|---------|--------|
| Fibroblast growth factor receptor 1                                            | FGFR1   | 700126 |
| Fibroblast growth factor receptor substrate 3                                  | FRS3    | 694462 |
| Fibromodulin                                                                   | FMOD    | 703048 |
| Fibronectin 1                                                                  | FN1     | 613269 |
| Fibronectin type III domain containing 4                                       | FNDC4   | 702098 |
| FIG4 phosphoinositide 5-phosphatase                                            | FIG4    | 699914 |
| Filamin B, beta                                                                | FLNB    | 702732 |
| Filamin binding LIM protein 1                                                  | FBLIM1  | 695727 |
| Finkel-Biskis-Reilly murine sarcoma virus (FBR-musv)<br>ubiquitously expressed | FAU     | 716761 |
| FK506 binding protein 11                                                       | FKBP11  | 708598 |
| FK506 binding protein 7                                                        | FKBP7   | 703299 |
| FK506 binding protein 9                                                        | FKBP9   | 708827 |
| Flavin adenine dinucleotide synthetase 1                                       | FLAD1   | 717133 |
| Flightless I actin binding protein                                             | FLII    | 700471 |
| FLYWCH-type zinc finger 1                                                      | FLYWCH1 | 700909 |
| Follicle stimulating hormone, beta polypeptide                                 | FSHB    | 697317 |
| Follistatin like 1                                                             | FSTL1   | 713367 |
| Forkhead box C2                                                                | FOXC2   | 694852 |
| Formin homology 2 domain containing 1                                          | FHOD1   | 697346 |
| Four and a half LIM domains 2                                                  | FHL2    | 713222 |
| Four and a half LIM domains 3                                                  | FHL3    | 715313 |
| Fragile X mental retardation, autosomal homolog 1                              | FXR1    | 710170 |
| FRAS1 related extracellular matrix 1                                           | FREM1   | 713874 |
| Frataxin                                                                       | FXN     | 699469 |
| Free fatty acid receptor 4                                                     | FFAR4   | 700014 |
| Frizzled class receptor 6                                                      | FZD6    | 694625 |
| Ftsj RNA methyltransferase homolog 1 (E. Coli)                                 | FTSJ1   | 710243 |
| Fucosyltransferase 8 (alpha (1,6) fucosyltransferase)                          | FUT8    | 708839 |
| Fumarylacetoacetate hydrolase (fumarylacetoacetase)                            | FAH     | 712716 |
| FUN14 domain containing 1                                                      | FUNDC1  | 709370 |
| Fuzzy planar cell polarity protein                                             | FUZ     | 719442 |
| FXYP domain containing ion transport regulator 7                               | FXYP7   | 718457 |
| FYN proto-oncogene, Src family tyrosine kinase                                 | FYN     | 574214 |
| FYVE, rhogef and PH domain containing 2                                        | FGD2    | 719329 |
| G elongation factor, mitochondrial 2                                           | GFM2    | 704247 |
| G kinase anchoring protein 1                                                   | GKAP1   | 708816 |
| G protein pathway suppressor 1                                                 | GPS1    | 719343 |
| G protein-coupled bile acid receptor 1                                         | GPBAR1  | 697937 |
| G protein-coupled receptor 101                                                 | GPR101  | 694636 |
| G protein-coupled receptor 135                                                 | GPR135  | 701843 |
| G protein-coupled receptor 151                                                 | GPR151  | 708020 |
| G protein-coupled receptor 157                                                 | GPR157  | 722176 |
| G protein-coupled receptor 171                                                 | GPR171  | 709960 |
| G protein-coupled receptor 18                                                  | GPR18   | 698714 |
| G protein-coupled receptor 183                                                 | GPR183  | 698844 |
| G protein-coupled receptor 31                                                  | GPR31   | 717158 |
| G protein-coupled receptor 63                                                  | GPR63   | 704888 |

|                                                                         |           |           |
|-------------------------------------------------------------------------|-----------|-----------|
| G protein-coupled receptor 89A                                          | GPR89A    | 696579    |
| G protein-coupled receptor kinase interacting arfgap 2                  | GIT2      | 708092    |
| G2/M-phase specific E3 ubiquitin protein ligase                         | G2E3      | 717021    |
| GA binding protein transcription factor, beta subunit 1                 | GABPB1    | 715334    |
| GABA(A) receptor-associated protein like 2                              | GABARAPL2 | 714413    |
| Galactose-3-O-sulfotransferase 3                                        | GAL3ST3   | 714845    |
| Galactosidase alpha                                                     | GLA       | 703129    |
| Gametogenetin                                                           | GGN       | 715072    |
| Gametogenetin binding protein 2                                         | GGNBP2    | 713750    |
| Gamma-aminobutyric acid (GABA) A receptor, beta 1                       | GABRB1    | 711217    |
| Gamma-glutamyl hydrolase (conjugase, folylpolygamma glutamyl hydrolase) | GGH       | 700747    |
| Gamma-glutamylcyclotransferase                                          | GGCT      | 695547    |
| Gamma-glutamyltransferase 5                                             | GGT5      | 720345    |
| Gap junction protein alpha 1                                            | GJA1      | 714344    |
| Gap junction protein alpha 3                                            | GJA3      | 704432    |
| Gap junction protein delta 4                                            | GJD4      | 699010    |
| Gastrulation brain homeobox 2                                           | GBX2      | 693901    |
| GATA binding protein 2                                                  | GATA2     | 705551    |
| GCN1, eif2 alpha kinase activator homolog                               | GCN1      | 698528    |
| GC-rich promoter binding protein 1                                      | GPBP1     | 708322    |
| GC-rich promoter binding protein 1-like 1                               | GPBP1L1   | 706690    |
| GDP-mannose 4,6-dehydratase                                             | GMDS      | 707051    |
| GDP-mannose pyrophosphorylase B                                         | GMPPB     | 705454    |
| General transcription factor IIA 2                                      | GTF2A2    | 702984    |
| General transcription factor IIB                                        | GTF2B     | 694770    |
| General transcription factor IIE subunit 2                              | GTF2E2    | 694622    |
| General transcription factor IIH subunit 5                              | GTF2H5    | 700107    |
| General transcription factor IIIA                                       | GTF3A     | 710492    |
| General transcription factor IIIC subunit 4                             | GTF3C4    | 714849    |
| General transcription factor IIIC subunit 6                             | GTF3C6    | 696512    |
| Geranylgeranyl diphosphate synthase 1                                   | GGPS1     | 100425248 |
| Germ cell-less, spermatogenesis associated 1                            | GMCL1     | 701545    |
| GID complex subunit 8                                                   | GID8      | 698189    |
| GIN5 complex subunit 2 (Psf2 homolog)                                   | GIN2      | 693426    |
| GLE1, RNA export mediator                                               | GLE1      | 717474    |
| GLI family zinc finger 1                                                | GLI1      | 714843    |
| Glucokinase (hexokinase 4) regulator                                    | GCKR      | 701431    |
| Glucose-fructose oxidoreductase domain containing 1                     | GFOD1     | 700607    |
| Glucosidase, beta (bile acid) 2                                         | GBA2      | 696062    |
| Glutamate decarboxylase 1                                               | GAD1      | 613030    |
| Glutamate-cysteine ligase, catalytic subunit                            | GCLC      | 710508    |
| Glutamic-oxaloacetic transaminase 2                                     | GOT2      | 707896    |
| Glutamine--fructose-6-phosphate transaminase 1                          | GFPT1     | 574376    |
| Glutaminy-peptide cyclotransferase                                      | QPCT      | 712233    |
| Glutaminyl-trna synthetase                                              | QARS      | 708111    |
| Glutamyl aminopeptidase (aminopeptidase A)                              | ENPEP     | 699615    |
| Glutaredoxin 5                                                          | GLRX5     | 702989    |

|                                                                                         |         |           |
|-----------------------------------------------------------------------------------------|---------|-----------|
| Glutathione peroxidase 1                                                                | GPX1    | 706732    |
| Glutathione peroxidase 6                                                                | GPX6    | 100286832 |
| Glutathione peroxidase 8 (putative)                                                     | GPX8    | 705965    |
| Glutathione S-transferase alpha 4                                                       | GSTA4   | 709666    |
| Glutathione S-transferase omega 1                                                       | GSTO1   | 716078    |
| Glutathione S-transferase omega 2                                                       | GSTO2   | 715291    |
| Glutathione S-transferase, C-terminal domain containing                                 | GSTCD   | 694220    |
| Glyceraldehyde-3-phosphate dehydrogenase, spermatogenic                                 | GAPDHS  | 709485    |
| Glycerol-3-phosphate acyltransferase, mitochondrial                                     | GPAM    | 696042    |
| Glycophorin C (Gerbich blood group)                                                     | GYPC    | 712092    |
| Glycosylphosphatidylinositol anchor attachment 1                                        | GPAA1   | 699887    |
| Glycosyltransferase 8 domain containing 1                                               | GLT8D1  | 695999    |
| Glycosyltransferase like domain containing 1                                            | GTDC1   | 100424584 |
| Glypican 1                                                                              | GPC1    | 698326    |
| Golgi reassembly stacking protein 2                                                     | GORASP2 | 694170    |
| Golgi-associated, gamma adaptin ear containing, ARF binding protein 3                   | GGA3    | 705751    |
| Golgin A7                                                                               | GOLGA7  | 709911    |
| Golgin B1                                                                               | GOLGB1  | 713993    |
| G-protein signaling modulator 1                                                         | GPSM1   | 710652    |
| Grancalcin                                                                              | GCA     | 702138    |
| Granulysin                                                                              | GNLY    | 696059    |
| Granzyme A                                                                              | GZMA    | 705712    |
| GRB2-related adaptor protein                                                            | GRAP    | 702473    |
| Gremlin 2, DAN family BMP antagonist                                                    | GREM2   | 708280    |
| Growth arrest and DNA damage inducible beta                                             | GADD45B | 711257    |
| Growth arrest and DNA damage inducible gamma                                            | GADD45G | 697835    |
| Growth arrest specific 6                                                                | GAS6    | 716066    |
| Growth differentiation factor 2                                                         | GDF2    | 711516    |
| Growth differentiation factor 7                                                         | GDF7    | 702462    |
| Growth factor receptor bound protein 10                                                 | GRB10   | 694786    |
| Growth hormone inducible transmembrane protein                                          | GHITM   | 702691    |
| Growth hormone secretagogue receptor                                                    | GHSR    | 694587    |
| GRP1 (general receptor for phosphoinositides 1)-associated scaffold protein             | GRASP   | 696547    |
| GTP binding protein overexpressed in skeletal muscle                                    | GEM     | 699130    |
| Gtpase activating protein (SH3 domain) binding protein 1                                | G3BP1   | 713884    |
| Gtpase, IMAP family member 4                                                            | GIMAP4  | 713506    |
| Guanidinoacetate N-methyltransferase                                                    | GAMT    | 721263    |
| Guanine nucleotide binding protein (G protein), alpha inhibiting activity polypeptide 2 | GNAI2   | 703780    |
| Guanine nucleotide binding protein (G protein), beta polypeptide 2-like 1               | GNB2L1  | 708526    |
| Guanine nucleotide binding protein (G protein), gamma 10                                | GNG10   | 708193    |
| Guanine nucleotide binding protein (G protein), gamma 11                                | GNG11   | 700606    |
| Guanosine monophosphate reductase 2                                                     | GMPR2   | 715719    |
| Guanylate binding protein 2, interferon-inducible                                       | GBP2    | 694684    |
| Guanylate kinase 1                                                                      | GUK1    | 695272    |

|                                                                |           |        |
|----------------------------------------------------------------|-----------|--------|
| H2A histone family, member X                                   | H2AFX     | 703073 |
| H2A histone family, member Y                                   | H2AFY     | 711836 |
| H2A histone family, member Y2                                  | H2AFY2    | 711117 |
| H2A histone family, member Z                                   | H2AFZ     | 709326 |
| Haloacid dehalogenase like hydrolase domain containing 2       | HDHD2     | 697216 |
| HAUS augmin like complex subunit 8                             | HAUS8     | 718874 |
| Hdc homolog, cell cycle regulator                              | HECA      | 702628 |
| Heat shock factor binding protein 1                            | HSBP1     | 714498 |
| Heat shock protein 90kda alpha (cytosolic), class A member 1   | HSP90AA1  | 708431 |
| Heat shock protein 90kda alpha family class B member 1         | HSP90AB1  | 702293 |
| Heat shock protein 90kda beta family member 1                  | HSP90B1   | 699568 |
| Heat shock protein family A (Hsp70) member 8                   | HSPA8     | 707989 |
| Heat shock protein family B (small) member 11                  | HSPB11    | 714791 |
| Heat shock protein family B (small) member 6                   | HSPB6     | 710760 |
| Heat shock protein family D (Hsp60) member 1                   | HSPD1     | 698024 |
| Heat shock protein family H (Hsp110) member 1                  | HSPH1     | 721956 |
| Heat shock transcription factor 2                              | HSF2      | 713938 |
| HECT domain containing E3 ubiquitin protein ligase 1           | HECTD1    | 717177 |
| HECT domain containing E3 ubiquitin protein ligase 3           | HECTD3    | 705051 |
| Helicase (DNA) B                                               | HELB      | 717860 |
| Helicase, lymphoid-specific                                    | HELLS     | 701598 |
| Hematological and neurological expressed 1                     | HN1       | 664729 |
| Hematopoietic cell-specific Lyn substrate 1                    | HCLS1     | 714044 |
| Hematopoietic prostaglandin D synthase                         | HPGDS     | 705227 |
| Hemoglobin subunit alpha 1                                     | HBA1      | 701930 |
| Hepatocyte growth factor-regulated tyrosine kinase substrate   | HGS       | 714385 |
| Hes family bhlh transcription factor 7                         | HES7      | 721942 |
| Hes-related family bhlh transcription factor with YRPW motif 2 | HEY2      | 712988 |
| Heterogeneous nuclear ribonucleoprotein A/B                    | HNRNPAB   | 702509 |
| Heterogeneous nuclear ribonucleoprotein A1                     | HNRNPA1   | 702977 |
| Heterogeneous nuclear ribonucleoprotein A2/B1                  | HNRNPA2B1 | 701821 |
| Heterogeneous nuclear ribonucleoprotein C (C1/C2)              | HNRNPC    | 706423 |
| Heterogeneous nuclear ribonucleoprotein D                      | HNRNPD    | 694867 |
| Heterogeneous nuclear ribonucleoprotein D like                 | HNRNPDL   | 694603 |
| Heterogeneous nuclear ribonucleoprotein H2 (H')                | HNRNPH2   | 703254 |
| Heterogeneous nuclear ribonucleoprotein L                      | HNRNPL    | 694448 |
| Heterogeneous nuclear ribonucleoprotein L-like                 | HNRNPLL   | 710841 |
| Hexamethylene bis-acetamide inducible 2                        | HEXIM2    | 716047 |
| High mobility group box 3                                      | HMGB3     | 703598 |
| Hippocalcin                                                    | HPCA      | 710249 |
| HIRA interacting protein 3                                     | HIRIP3    | 708004 |
| Histidine triad nucleotide binding protein 1                   | HINT1     | 706083 |
| Histidyl-trna synthetase 2                                     | HARS2     | 697009 |
| Histone cluster 1, h3d                                         | HIST1H3D  | 695092 |
| Histone cluster 3, h2a                                         | HIST3H2A  | 693768 |
| Histone deacetylase 10                                         | HDAC10    | 715698 |
| Histone deacetylase 11                                         | HDAC11    | 693537 |
| Histone deacetylase 5                                          | HDAC5     | 711456 |



|                                                                                                                  |          |           |
|------------------------------------------------------------------------------------------------------------------|----------|-----------|
| Histone H4 transcription factor                                                                                  | HINFP    | 703763    |
| HMG-box transcription factor 1                                                                                   | HBP1     | 699237    |
| Holliday junction recognition protein                                                                            | HJURP    | 718180    |
| Homeodomain interacting protein kinase 1                                                                         | HIPK1    | 707856    |
| Homocysteine-inducible, endoplasmic reticulum stress-inducible, ubiquitin-like domain member 1                   | HERPUD1  | 703210    |
| Hyaluronan and proteoglycan link protein 3                                                                       | HAPLN3   | 698880    |
| Hyaluronoglucosaminidase 2                                                                                       | HYAL2    | 702484    |
| Hydroxyacyl-coa dehydrogenase/3-ketoacyl-coa thiolase/enoyl-coa hydratase (trifunctional protein), alpha subunit | HADHA    | 695975    |
| Hydroxysteroid (17-beta) dehydrogenase 10                                                                        | HSD17B10 | 700018    |
| Hydroxysteroid (17-beta) dehydrogenase 8                                                                         | HSD17B8  | 718119    |
| Hyperpolarization activated cyclic nucleotide gated potassium channel 3                                          | HCN3     | 717719    |
| Hypocretin (orexin) neuropeptide precursor                                                                       | HCRT     | 709564    |
| Hypoxia up-regulated 1                                                                                           | HYOU1    | 707715    |
| IKAROS family zinc finger 5                                                                                      | IKZF5    | 716950    |
| IL2-inducible T-cell kinase                                                                                      | ITK      | 715471    |
| ILK associated serine/threonine phosphatase                                                                      | ILKAP    | 706334    |
| Immunoglobulin superfamily member 21                                                                             | IGSF21   | 701539    |
| Immunoglobulin superfamily member 10                                                                             | IGSF10   | 709661    |
| IMP (inosine 5'-monophosphate) dehydrogenase 1                                                                   | IMPDH1   | 701039    |
| IMP3, U3 small nucleolar ribonucleoprotein                                                                       | IMP3     | 706202    |
| Importin 13                                                                                                      | IPO13    | 702007    |
| Importin 8                                                                                                       | IPO8     | 693514    |
| Increased sodium tolerance 1 homolog (yeast)                                                                     | IST1     | 707245    |
| Inhibin alpha                                                                                                    | INHA     | 574379    |
| Inhibitor of DNA binding 1, dominant negative helix-loop-helix protein                                           | ID1      | 713160    |
| Inhibitor of growth family member 2                                                                              | ING2     | 701839    |
| Inhibitor of growth family member 4                                                                              | ING4     | 722073    |
| Inhibitor of kappa light polypeptide gene enhancer in B-cells, kinase beta                                       | IKBKB    | 704683    |
| INO80 complex subunit C                                                                                          | INO80C   | 708819    |
| Inosine triphosphatase                                                                                           | ITPA     | 717257    |
| Inositol hexakisphosphate kinase 1                                                                               | IP6K1    | 705576    |
| Inositol monophosphatase domain containing 1                                                                     | IMPAD1   | 696893    |
| Inositol polyphosphate-1-phosphatase                                                                             | INPP1    | 703301    |
| Inositol(myo)-1(or 4)-monophosphatase 2                                                                          | IMPA2    | 704320    |
| Inositol-3-phosphate synthase 1                                                                                  | ISYNA1   | 719487    |
| Insulin like 3                                                                                                   | INSL3    | 100533192 |
| Insulin like growth factor 1 receptor                                                                            | IGF1R    | 708227    |
| Insulin like growth factor binding protein 3                                                                     | IGFBP3   | 696868    |
| Insulin like growth factor binding protein 5                                                                     | IGFBP5   | 696339    |
| Insulin like growth factor binding protein 7                                                                     | IGFBP7   | 693564    |
| Insulin like growth factor binding protein acid labile subunit                                                   | IGFALS   | 722493    |
| Integral membrane protein 2C                                                                                     | ITM2C    | 711245    |
| Integrator complex subunit 10                                                                                    | INTS10   | 705240    |

|                                                              |          |        |
|--------------------------------------------------------------|----------|--------|
| Integrator complex subunit 12                                | INTS12   | 694344 |
| Integrator complex subunit 2                                 | INTS2    | 712351 |
| Integrator complex subunit 4                                 | INTS4    | 699466 |
| Integrator complex subunit 8                                 | INTS8    | 700255 |
| Integrin alpha FG-GAP repeat containing 1                    | ITFG1    | 716435 |
| Integrin linked kinase                                       | ILK      | 709944 |
| Integrin subunit alpha 4                                     | ITGA4    | 704745 |
| Integrin subunit beta 7                                      | ITGB7    | 699405 |
| Interferon induced protein with tetratricopeptide repeats 2  | IFIT2    | 695452 |
| Interferon induced, with helicase C domain 1                 | IFIH1    | 702024 |
| Interferon regulatory factor 2                               | IRF2     | 694347 |
| Interferon, alpha-inducible protein 6                        | IFI6     | 716339 |
| Interferon, lambda receptor 1                                | IFNLR1   | 711625 |
| Interferon-related developmental regulator 2                 | IFRD2    | 702959 |
| Interleukin 1 receptor associated kinase 1 binding protein 1 | IRAK1BP1 | 716772 |
| Interleukin 1 receptor-like 1                                | IL1RL1   | 711893 |
| Interleukin 17 receptor A                                    | IL17RA   | 709005 |
| Interleukin 17B                                              | IL17B    | 710679 |
| Interleukin 20 receptor subunit beta                         | IL20RB   | 716769 |
| Interleukin enhancer binding factor 3                        | ILF3     | 713427 |
| Intracisternal A particle-promoted polypeptide               | IPP      | 706893 |
| Intraflagellar transport 20                                  | IFT20    | 715773 |
| Intraflagellar transport 22                                  | IFT22    | 714551 |
| Intraflagellar transport 27                                  | IFT27    | 697032 |
| Intraflagellar transport 46                                  | IFT46    | 700582 |
| Intraflagellar transport 57                                  | IFT57    | 705088 |
| Intraflagellar transport 74                                  | IFT74    | 707561 |
| Intraflagellar transport 80                                  | IFT80    | 705146 |
| IQ motif and Sec7 domain 1                                   | IQSEC1   | 693922 |
| IQ motif containing B1                                       | IQCB1    | 715032 |
| IQ motif containing F1                                       | IQCF1    | 699719 |
| IQ motif containing K                                        | IQCK     | 695417 |
| IQ motif containing with AAA domain 1                        | IQCA1    | 694173 |
| Iron-sulfur cluster assembly 2                               | ISCA2    | 700004 |
| Iron-sulfur cluster assembly enzyme                          | ISCU     | 705669 |
| Iroquois homeobox 6                                          | IRX6     | 698232 |
| Isocitrate dehydrogenase 3 (NAD+) alpha                      | IDH3A    | 677715 |
| Isocitrate dehydrogenase 3 (NAD+) gamma                      | IDH3G    | 698558 |
| Isoleucyl-trna synthetase                                    | IARS     | 677705 |
| IWS1 homolog (S. Cerevisiae)                                 | IWS1     | 699205 |
| Izumo sperm-egg fusion 1                                     | IZUMO1   | 718234 |
| Janus kinase and microtubule interacting protein 1           | JAKMIP1  | 722750 |
| JNK1/MAPK8-associated membrane protein                       | JKAMP    | 702307 |
| Jumonji domain containing 1C                                 | JMJD1C   | 697630 |
| Junction adhesion molecule like                              | JAML     | 704919 |
| Kallikrein related peptidase 8                               | KLK8     | 719488 |
| Karyopherin alpha 4 (importin alpha 3)                       | KPNA4    | 702486 |
| KAT8 regulatory NSL complex subunit 3                        | KANSL3   | 706159 |

|                                                             |           |           |
|-------------------------------------------------------------|-----------|-----------|
| KDEL endoplasmic reticulum protein retention receptor 3     | KDELR3    | 700810    |
| KDEL motif containing 1                                     | KDELC1    | 702156    |
| Kelch domain containing 4                                   | KLHDC4    | 695768    |
| Kelch domain containing 9                                   | KLHDC9    | 719863    |
| Kelch like family member 3                                  | KLHL3     | 713123    |
| Kelch like family member 32                                 | KLHL32    | 709276    |
| Kelch like family member 5                                  | KLHL5     | 698740    |
| Kelch repeat and BTB (POZ) domain containing 3              | KBTBD3    | 706382    |
| Kelch repeat and BTB (POZ) domain containing 4              | KBTBD4    | 711452    |
| Keratin 14, type I                                          | KRT14     | 100426176 |
| Keratin 79, type II                                         | KRT79     | 700188    |
| Keratin associated protein 12-4                             | KRTAP12-4 | 712284    |
| Keratin associated protein 19-3                             | KRTAP19-3 | 703677    |
| KIAA0141 ortholog                                           | KIAA0141  | 702802    |
| KIAA0226-like ortholog                                      | KIAA0226L | 703875    |
| KIAA0907 ortholog                                           | KIAA0907  | 718005    |
| KIAA0922 ortholog                                           | KIAA0922  | 696761    |
| KIAA1024 ortholog                                           | KIAA1024  | 712078    |
| KIAA1033 ortholog                                           | KIAA1033  | 701501    |
| KIAA1143 ortholog                                           | KIAA1143  | 714979    |
| KIAA1324-like ortholog                                      | KIAA1324L | 707191    |
| KIAA1958 ortholog                                           | KIAA1958  | 707028    |
| KIAA2013 ortholog                                           | KIAA2013  | 722762    |
| Killer cell lectin-like receptor subfamily F, member 1      | KLRF1     | 574389    |
| Kin17 DNA and RNA binding protein                           | KIN       | 713634    |
| Kinase D-interacting substrate 220kda                       | KIDINS220 | 693522    |
| Kinesin family member 2C                                    | KIF2C     | 705381    |
| Kinesin family member 5A                                    | KIF5A     | 711936    |
| Kinesin family member 6                                     | KIF6      | 719593    |
| Kinesin family member C3                                    | KIFC3     | 705951    |
| Kinesin heavy chain member 2A                               | KIF2A     | 696561    |
| Kinesin light chain 4                                       | KLC4      | 698356    |
| Kininogen 1                                                 | KNG1      | 707466    |
| Kizuna centrosomal protein                                  | KIZ       | 700808    |
| Klotho                                                      | KL        | 714042    |
| KN motif and ankyrin repeat domains 1                       | KANK1     | 697569    |
| KRAB-A domain containing 2                                  | KRBA2     | 717353    |
| Kruppel-like factor 10                                      | KLF10     | 693458    |
| Kruppel-like factor 11                                      | KLF11     | 702323    |
| Kxd1 motif containing 1                                     | KXD1      | 720235    |
| L-2-hydroxyglutarate dehydrogenase                          | L2HGDH    | 705721    |
| La ribonucleoprotein domain family member 7                 | LARP7     | 703731    |
| Lactase like                                                | LCTL      | 710515    |
| Lactate dehydrogenase B                                     | LDHB      | 706110    |
| Lamin B receptor                                            | LBR       | 700801    |
| Late cornified envelope 4A                                  | LCE4A     | 100423936 |
| Late endosomal/lysosomal adaptor, MAPK and MTOR activator 1 | LAMTOR1   | 718249    |

|                                                                                          |           |           |
|------------------------------------------------------------------------------------------|-----------|-----------|
| Late endosomal/lysosomal adaptor, MAPK and MTOR activator 3                              | LAMTOR3   | 709133    |
| Latexin                                                                                  | LXN       | 703996    |
| LCK proto-oncogene, Src family tyrosine kinase                                           | LCK       | 717704    |
| LDL receptor related protein 1                                                           | LRP1      | 710965    |
| Lectin, galactoside-binding, soluble, 14                                                 | LGALS14   | 698227    |
| Lectin, mannose-binding, 1                                                               | LMAN1     | 697449    |
| Leucine rich repeat and coiled-coil centrosomal protein 1                                | LRRCC1    | 707964    |
| Leucine rich repeat and Ig domain containing 2                                           | LINGO2    | 706386    |
| Leucine rich repeat containing 14                                                        | LRRC14    | 703587    |
| Leucine rich repeat containing 20                                                        | LRRC20    | 710594    |
| Leucine rich repeat containing 40                                                        | LRRC40    | 702565    |
| Leucine rich repeat containing 42                                                        | LRRC42    | 714839    |
| Leucine rich repeat protein 1                                                            | LRR1      | 706658    |
| Leucine zipper putative tumor suppressor 3                                               | PROSAP1P1 | 717136    |
| Leucine zipper, down-regulated in cancer 1                                               | LDOC1     | 696902    |
| Leucine zipper, down-regulated in cancer 1-like                                          | LDOC1L    | 712760    |
| Leucine-rich repeat containing 8 family member D                                         | LRRC8D    | 100423128 |
| Leucine-rich repeat LGI family member 2                                                  | LGI2      | 693308    |
| Leucine-rich repeat LGI family member 4                                                  | LGI4      | 718426    |
| Leucine-rich repeats and WD repeat domain containing 1                                   | LRWD1     | 715187    |
| Leukocyte immunoglobulin-like receptor, subfamily B (with TM and ITIM domains), member 1 | LILRB1    | 692340    |
| Leukocyte specific transcript 1                                                          | LST1      | 100141392 |
| Leukocyte-associated immunoglobulin-like receptor 1                                      | LAIR1     | 695533    |
| Leupaxin                                                                                 | LPXN      | 702033    |
| Ligand dependent nuclear receptor interacting factor 1                                   | LRIF1     | 702445    |
| Ligase III, DNA, ATP-dependent                                                           | LIG3      | 715181    |
| LIM domain containing 2                                                                  | LIMD2     | 717889    |
| LIM homeobox 5                                                                           | LHX5      | 713417    |
| Limb bud and heart development                                                           | LBH       | 704749    |
| Lin-9 DREAM muv b core complex component                                                 | LIN9      | 699056    |
| Linker for activation of T-cells family member 2                                         | LAT2      | 693676    |
| Lipase A, lysosomal acid, cholesterol esterase                                           | LIPA      | 695240    |
| Lipid droplet associated hydrolase                                                       | LDAH      | 717510    |
| Lipocalin 1                                                                              | LCN1      | 711974    |
| Lipocalin 6                                                                              | LCN6      | 574148    |
| Lipoma HMGIC fusion partner-like 3                                                       | LHFPL3    | 697053    |
| Lipoma HMGIC fusion partner-like 4                                                       | LHFPL4    | 700973    |
| LSM10, U7 small nuclear RNA associated                                                   | LSM10     | 713277    |
| LSM14A mrna processing body assembly factor                                              | LSM14A    | 705085    |
| LSM6 homolog, U6 small nuclear RNA and mrna degradation associated                       | LSM6      | 703226    |
| LUC7-like 3 pre-mrna splicing factor                                                     | LUC7L3    | 703662    |
| Lymphocyte antigen 6 complex, locus G6C                                                  | LY6G6C    | 716220    |
| Lymphoid enhancer-binding factor 1                                                       | LEF1      | 695776    |
| Lymphotoxin alpha                                                                        | LTA       | 715425    |
| Lysine (K)-specific demethylase 1A                                                       | KDM1A     | 718609    |

|                                                                                         |          |           |
|-----------------------------------------------------------------------------------------|----------|-----------|
| Lysine (K)-specific methyltransferase 5B                                                | KMT5B    | 710481    |
| Lysine-rich nucleolar protein 1                                                         | KNOP1    | 695144    |
| Lysophosphatidic acid receptor 6                                                        | LPAR6    | 705081    |
| Lysophosphatidylcholine acyltransferase 4                                               | LPCAT4   | 696388    |
| Lysosomal protein transmembrane 4 alpha                                                 | LAPTM4A  | 701298    |
| Lysyl oxidase like 3                                                                    | LOXL3    | 709834    |
| Lysyl-trna synthetase                                                                   | KARS     | 714516    |
| MACRO domain containing 1                                                               | MACROD1  | 717961    |
| Macrophage erythroblast attacher                                                        | MAEA     | 702015    |
| MAD2L1 binding protein                                                                  | MAD2L1BP | 701099    |
| MAGE family member D1                                                                   | MAGED1   | 696658    |
| MAGE family member F1                                                                   | MAGEF1   | 701676    |
| MAGE family member H1                                                                   | MAGEH1   | 703812    |
| Major facilitator superfamily domain containing 5                                       | MFSD5    | 702021    |
| Major histocompatibility complex, class II, DM alpha                                    | MAMU-DMA | 717870    |
| Major histocompatibility complex, class II, DM beta                                     | MAMU-DMB | 100429856 |
| Malate dehydrogenase 1                                                                  | MDH1     | 694703    |
| Male-specific lethal 3 homolog (Drosophila)                                             | MSL3     | 720836    |
| Malonyl-coa-acyl carrier protein transacylase                                           | MCAT     | 711556    |
| Mannose phosphate isomerase                                                             | MPI      | 722129    |
| Mannose receptor, C type 1                                                              | MRC1     | 701010    |
| Mannosyl (alpha-1,3-)-glycoprotein beta-1,4-N-acetyl glucosaminyltransferase, isozyme A | MGAT4A   | 708094    |
| Mannosyl (alpha-1,3-)-glycoprotein beta-1,4-N-acetyl glucosaminyltransferase, isozyme B | MGAT4B   | 705006    |
| Mannosyl (alpha-1,6-)-glycoprotein beta-1,2-N-acetyl glucosaminyltransferase            | MGAT2    | 706426    |
| Mannosyl-oligosaccharide glucosidase                                                    | MOGS     | 708913    |
| MANSC domain containing 1                                                               | MANSC1   | 696667    |
| MAP kinase interacting serine/threonine kinase 1                                        | MKNK1    | 710061    |
| MARCKS-like 1                                                                           | MARCKSL1 | 100428616 |
| Mastermind like transcriptional coactivator 1                                           | MAML1    | 715047    |
| Matrin 3                                                                                | MATR3    | 100568448 |
| Matrix metalloproteinase 11                                                             | MMP11    | 699067    |
| Mckusick-Kaufman syndrome                                                               | MKKS     | 718547    |
| Mdm1 nuclear protein                                                                    | MDM1     | 718062    |
| MDM2 binding protein                                                                    | MTBP     | 703121    |
| Mediator complex subunit 11                                                             | MED11    | 709561    |
| Mediator complex subunit 13-like                                                        | MED13L   | 713867    |
| Mediator complex subunit 19                                                             | MED19    | 704421    |
| Mediator complex subunit 21                                                             | MED21    | 710699    |
| Mediator complex subunit 23                                                             | MED23    | 714629    |
| Mediator complex subunit 4                                                              | MED4     | 704644    |
| Mediator complex subunit 6                                                              | MED6     | 693320    |
| Mediator complex subunit 8                                                              | MED8     | 700676    |
| Meiosis 1 associated protein                                                            | M1AP     | 710210    |
| Meiosis specific nuclear structural 1                                                   | MNS1     | 699377    |
| Melanocortin 2 receptor accessory protein                                               | MRAP     | 701330    |

|                                                                                                                                         |         |           |
|-----------------------------------------------------------------------------------------------------------------------------------------|---------|-----------|
| Membrane frizzled-related protein                                                                                                       | MFRP    | 704965    |
| Membrane protein, palmitoylated 1                                                                                                       | MPP1    | 702092    |
| Membrane protein, palmitoylated 4                                                                                                       | MPP4    | 702459    |
| Membrane-spanning 4-domains, subfamily A, member 1                                                                                      | MS4A1   | 696843    |
| Membrane-spanning 4-domains, subfamily A, member 4A                                                                                     | MS4A4A  | 698027    |
| Meningioma expressed antigen 5 (hyaluronidase)                                                                                          | MGEA5   | 712370    |
| Meprin A subunit alpha                                                                                                                  | MEP1A   | 704781    |
| Mesoderm development candidate 1                                                                                                        | MESDC1  | 713059    |
| Mesoderm induction early response 1, family member 2                                                                                    | MIER2   | 701450    |
| Mesoderm specific transcript                                                                                                            | MEST    | 703327    |
| MET proto-oncogene, receptor tyrosine kinase                                                                                            | MET     | 704562    |
| Metadherin                                                                                                                              | MTDH    | 702410    |
| Metal response element binding transcription factor 2                                                                                   | MTF2    | 707104    |
| Metallo-beta-lactamase domain containing 2                                                                                              | MBLAC2  | 695437    |
| Metastasis associated 1 family member 2                                                                                                 | MTA2    | 718772    |
| Metastasis associated 1 family member 3                                                                                                 | MTA3    | 712967    |
| Methionine adenosyltransferase II, beta                                                                                                 | MAT2B   | 698119    |
| Methionine sulfoxide reductase A                                                                                                        | MSRA    | 698628    |
| Methionine sulfoxide reductase B1                                                                                                       | MSRB1   | 693358    |
| Methionyl aminopeptidase 1                                                                                                              | METAP1  | 710537    |
| Methionyl-trna synthetase                                                                                                               | MARS    | 714744    |
| Methionyl-trna synthetase 2, mitochondrial                                                                                              | MARS2   | 698275    |
| Methyl-cpg binding domain 4 DNA glycosylase                                                                                             | MBD4    | 720557    |
| Methylcrotonoyl-coa carboxylase 1                                                                                                       | MCCC1   | 708258    |
| Methylenetetrahydrofolate dehydrogenase (NADP+ dependent) 1, methenyltetrahydrofolate cyclohydrolase, formyltetrahydrofolate synthetase | MTHFD1  | 707059    |
| Methylmalonic aciduria (cobalamin deficiency) cblb type                                                                                 | MMAB    | 708973    |
| Methylphosphate capping enzyme                                                                                                          | MEPCE   | 711829    |
| Methyltransferase like 1                                                                                                                | METTL1  | 715796    |
| Methyltransferase like 13                                                                                                               | METTL13 | 704943    |
| Methyltransferase like 18                                                                                                               | METTL18 | 701890    |
| Methyltransferase like 2A                                                                                                               | METTL2A | 717533    |
| Mevalonate kinase                                                                                                                       | MVK     | 707645    |
| Mex-3 RNA binding family member B                                                                                                       | MEX3B   | 713441    |
| Microfibrillar associated protein 1                                                                                                     | MFAP1   | 711111    |
| Microsomal glutathione S-transferase 2                                                                                                  | MGST2   | 697983    |
| Microtubule associated protein 1S                                                                                                       | MAP1S   | 719196    |
| Microtubule associated protein 4                                                                                                        | MAP4    | 100423616 |
| Microtubule associated protein RP/EB family member 1                                                                                    | MAPRE1  | 711404    |
| Midline 1                                                                                                                               | MID1    | 709683    |
| Midnolin                                                                                                                                | MIDN    | 721215    |
| MIF4G domain containing                                                                                                                 | MIF4GD  | 706005    |
| Minichromosome maintenance complex binding protein                                                                                      | MCMBP   | 704028    |
| Minichromosome maintenance complex component 3                                                                                          | MCM3    | 708320    |
| Minichromosome maintenance complex component 3 associated protein                                                                       | MCM3AP  | 721810    |
| Minichromosome maintenance complex component 5                                                                                          | MCM5    | 717548    |

|                                                          |          |           |
|----------------------------------------------------------|----------|-----------|
| Mitochondrial assembly of ribosomal large subunit 1      | MALSU1   | 704884    |
| Mitochondrial carrier 1                                  | MTCH1    | 719313    |
| Mitochondrial E3 ubiquitin protein ligase 1              | MUL1     | 705429    |
| Mitochondrial fission regulator 1                        | MTFR1    | 711143    |
| Mitochondrial fission regulator 1-like                   | MTFR1L   | 713213    |
| Mitochondrial genome maintenance exonuclease 1           | MGME1    | 696467    |
| Mitochondrial intermediate peptidase                     | MIPEP    | 707131    |
| Mitochondrial poly(A) polymerase                         | MTPAP    | 694491    |
| Mitochondrial pyruvate carrier 1                         | MPC1     | 716864    |
| Mitochondrial ribosomal protein L11                      | MRPL11   | 714094    |
| Mitochondrial ribosomal protein L13                      | MRPL13   | 702994    |
| Mitochondrial ribosomal protein L16                      | MRPL16   | 698831    |
| Mitochondrial ribosomal protein L17                      | MRPL17   | 697086    |
| Mitochondrial ribosomal protein L19                      | MRPL19   | 711081    |
| Mitochondrial ribosomal protein L20                      | MRPL20   | 701533    |
| Mitochondrial ribosomal protein L22                      | MRPL22   | 714920    |
| Mitochondrial ribosomal protein L24                      | MRPL24   | 718640    |
| Mitochondrial ribosomal protein L39                      | MRPL39   | 708631    |
| Mitochondrial ribosomal protein L41                      | MRPL41   | 702768    |
| Mitochondrial ribosomal protein L42                      | MRPL42   | 715676    |
| Mitochondrial ribosomal protein L44                      | MRPL44   | 677716    |
| Mitochondrial ribosomal protein L46                      | MRPL46   | 697872    |
| Mitochondrial ribosomal protein L50                      | MRPL50   | 713923    |
| Mitochondrial ribosomal protein L51                      | MRPL51   | 713036    |
| Mitochondrial ribosomal protein L55                      | MRPL55   | 695962    |
| Mitochondrial ribosomal protein S11                      | MRPS11   | 697743    |
| Mitochondrial ribosomal protein S17                      | MRPS17   | 703678    |
| Mitochondrial ribosomal protein S18C                     | MRPS18C  | 707257    |
| Mitochondrial ribosomal protein S21                      | MRPS21   | 706805    |
| Mitochondrial ribosomal protein S22                      | MRPS22   | 715845    |
| Mitochondrial ribosomal protein S33                      | MRPS33   | 693681    |
| Mitochondrial ribosomal protein S6                       | MRPS6    | 106997264 |
| Mitochondrial transcription termination factor 2         | MTERF2   | 703925    |
| Mitochondrial transcription termination factor 3         | MTERF3   | 701366    |
| Mitochondrial translational initiation factor 2          | MTIF2    | 717042    |
| Mitochondrial trna translation optimization 1            | MTO1     | 717688    |
| Mitogen-activated protein kinase 1                       | MAPK1    | 698569    |
| Mitogen-activated protein kinase 7                       | MAPK7    | 702837    |
| Mitogen-activated protein kinase 8 interacting protein 3 | MAPK8IP3 | 702388    |
| Mitogen-activated protein kinase associated protein 1    | MAPKAP1  | 702599    |
| Mitogen-activated protein kinase kinase 1                | MAP2K1   | 710415    |
| Mitogen-activated protein kinase kinase 4                | MAP2K4   | 718155    |
| Mitogen-activated protein kinase kinase 5                | MAP2K5   | 711672    |
| Mitogen-activated protein kinase kinase kinase 14        | MAP3K14  | 716258    |
| Mitogen-activated protein kinase kinase kinase 3         | MAP3K3   | 717866    |
| Mitogen-activated protein kinase kinase kinase 4         | MAP3K4   | 710360    |
| Mitogen-activated protein kinase kinase kinase 6         | MAP3K6   | 715911    |
| Mitogen-activated protein kinase kinase kinase kinase 1  | MAP4K1   | 694259    |

|                                                                |          |           |
|----------------------------------------------------------------|----------|-----------|
| Mitogen-activated protein kinase kinase kinase kinase 5        | MAP4K5   | 706204    |
| Mitogen-activated protein kinase-activated protein kinase 2    | MAPKAPK2 | 695044    |
| Mitogen-activated protein kinase-activated protein kinase 5    | MAPKAPK5 | 713521    |
| Mitotic spindle organizing protein 2B                          | MZT2B    | 701787    |
| MNAT CDK-activating kinase assembly factor 1                   | MNAT1    | 703905    |
| MON1 homolog B, secretory trafficking associated               | MON1B    | 715104    |
| Monoamine oxidase B                                            | MAOB     | 708468    |
| Monocyte to macrophage differentiation-associated              | MMD      | 706723    |
| MORC family CW-type zinc finger 4                              | MORC4    | 701136    |
| Morf4 family associated protein 1-like 1                       | MRFAP1L1 | 710411    |
| MORN repeat containing 2                                       | MORN2    | 106992912 |
| Mortality factor 4 like 1                                      | MORF4L1  | 711357    |
| Motilin                                                        | MLN      | 574099    |
| M-phase phosphoprotein 6                                       | MPHOSPH6 | 714335    |
| M-phase specific PLK1 interacting protein                      | MPLKIP   | 703092    |
| MRE11 homolog A, double strand break repair nuclease           | MRE11A   | 697566    |
| MRT4 homolog, ribosome maturation factor                       | MRT04    | 702926    |
| Msh homeobox 2                                                 | MSX2     | 694227    |
| Muscle RAS oncogene homolog                                    | MRAS     | 716352    |
| Muscleblind like splicing regulator 1                          | MBNL1    | 708735    |
| Mutl homolog 1                                                 | MLH1     | 698782    |
| Muty DNA glycosylase                                           | MUTYH    | 705651    |
| Myb/SANT-like DNA-binding domain containing 2                  | MSANTD2  | 712347    |
| MYC associated factor X                                        | MAX      | 708228    |
| Myelin protein zero-like 2                                     | MPZL2    | 699330    |
| Myeloid cell leukemia 1                                        | MCL1     | 707539    |
| Myeloid/lymphoid or mixed-lineage leukemia; translocated to, 6 | MLLT6    | 694045    |
| Myoferlin                                                      | MYOF     | 700922    |
| Myoneurin                                                      | MYNN     | 698094    |
| Myosin binding protein H                                       | MYBPH    | 703516    |
| Myosin IF                                                      | MYO1F    | 712101    |
| Myosin IIIB                                                    | MYO3B    | 693391    |
| Myosin light chain 4                                           | MYL4     | 717354    |
| Myosin, light chain 12A, regulatory, non-sarcomeric            | MYL12A   | 695077    |
| Myotrophin                                                     | MTPN     | 708941    |
| Myotubularin 1                                                 | MTM1     | 703131    |
| Myotubularin related protein 2                                 | MTMR2    | 699703    |
| Myotubularin related protein 4                                 | MTMR4    | 714621    |
| Myotubularin related protein 6                                 | MTMR6    | 709118    |
| Myotubularin related protein 8                                 | MTMR8    | 708037    |
| Myristoylated alanine-rich protein kinase C substrate          | MARCKS   | 694077    |
| MYST/Esa1-associated factor 6                                  | MEAF6    | 713666    |
| N(alpha)-acetyltransferase 35, natc auxiliary subunit          | NAA35    | 710122    |
| N(alpha)-acetyltransferase 50, nate catalytic subunit          | NAA50    | 709764    |
| N(alpha)-acetyltransferase 60, natf catalytic subunit          | NAA60    | 703207    |
| N-acetylglucosamine kinase                                     | NAGK     | 703976    |
| N-acetylglucosamine-1-phosphate transferase, gamma subunit     | GNPTG    | 722441    |
| N-acetyltransferase 10 (GCN5-related)                          | NAT10    | 717452    |



|                                                                   |         |           |
|-------------------------------------------------------------------|---------|-----------|
| NAD(P) dependent steroid dehydrogenase-like                       | NSDHL   | 693333    |
| NAD(P)H dehydrogenase, quinone 2                                  | NQO2    | 707675    |
| NADH:ubiquinone oxidoreductase complex assembly factor 1          | NDUFAF1 | 710275    |
| NADH:ubiquinone oxidoreductase complex assembly factor 2          | NDUFAF2 | 693441    |
| NADH:ubiquinone oxidoreductase complex assembly factor 4          | NDUFAF4 | 705102    |
| NADH:ubiquinone oxidoreductase complex assembly factor 6          | NDUFAF6 | 700515    |
| NADH:ubiquinone oxidoreductase complex assembly factor 7          | NDUFAF7 | 709473    |
| NADH:ubiquinone oxidoreductase core subunit S2                    | NDUFS2  | 719935    |
| NADH:ubiquinone oxidoreductase core subunit S3                    | NDUFS3  | 713040    |
| NADH:ubiquinone oxidoreductase subunit A1                         | NDUFA1  | 694635    |
| NADH:ubiquinone oxidoreductase subunit A12                        | NDUFA12 | 711970    |
| NADH:ubiquinone oxidoreductase subunit A8                         | NDUFA8  | 698706    |
| NADH:ubiquinone oxidoreductase subunit AB1                        | NDUFAB1 | 700718    |
| NADH:ubiquinone oxidoreductase subunit B10                        | NDUFB10 | 693482    |
| NADH:ubiquinone oxidoreductase subunit B2                         | NDUFB2  | 693431    |
| NADH:ubiquinone oxidoreductase subunit B4                         | NDUFB4  | 713428    |
| NADH:ubiquinone oxidoreductase subunit B8                         | NDUFB8  | 710521    |
| NADH:ubiquinone oxidoreductase subunit B9                         | NDUFB9  | 711387    |
| NADH:ubiquinone oxidoreductase subunit C1                         | NDUFC1  | 697242    |
| NADH:ubiquinone oxidoreductase subunit S4                         | NDUFS4  | 704137    |
| NADPH oxidase 1                                                   | NOX1    | 701376    |
| Nascent polypeptide-associated complex alpha subunit              | NACA    | 713416    |
| Natural killer cell granule protein 7                             | NKG7    | 719624    |
| NCK adaptor protein 2                                             | NCK2    | 713287    |
| NCK interacting protein with SH3 domain                           | NCKIPSD | 709410    |
| NCK-associated protein 1                                          | NCKAP1  | 711124    |
| Nebulette                                                         | NEBL    | 702764    |
| NECAP endocytosis associated 2                                    | NECAP2  | 698687    |
| Necdin, MAGE family member                                        | NDN     | 574323    |
| NEDD8 activating enzyme E1 subunit 1                              | NAE1    | 696429    |
| Negative elongation factor complex member C/D                     | NELFCD  | 696053    |
| Negative elongation factor complex member E                       | NELFE   | 716913    |
| Negative regulator of ubiquitin-like proteins 1                   | NUB1    | 715231    |
| Nerve growth factor receptor (TNFRSF16) associated protein 1      | NGFRAP1 | 100428976 |
| Neural precursor cell expressed, developmentally down-regulated 1 | NEDD1   | 713673    |
| Neurexophilin and PC-esterase domain family member 3              | NXPE3   | 702612    |
| Neuritin 1                                                        | NRN1    | 722968    |
| Neurofibromin 2 (merlin)                                          | NF2     | 714945    |
| Neuroigin 2                                                       | NLGN2   | 574368    |
| Neuronal differentiation 2                                        | NEUROD2 | 696976    |
| Neuronal guanine nucleotide exchange factor                       | NGEF    | 713917    |
| Neuronal PAS domain protein 3                                     | NPAS3   | 717281    |
| Neuronal pentraxin I                                              | NPTX1   | 718259    |
| Neuron-derived neurotrophic factor                                | NDNF    | 706304    |
| Neuropeptide FF-amide peptide precursor                           | NPFF    | 703412    |
| Neuropilin 1                                                      | NRP1    | 697755    |
| Neuroplastin                                                      | NPTN    | 699627    |

|                                                                      |         |           |
|----------------------------------------------------------------------|---------|-----------|
| Neutrophil cytosolic factor 1                                        | NCF1    | 694207    |
| NGFI-A binding protein 1                                             | NAB1    | 693274    |
| NGFI-A binding protein 2 (EGR1 binding protein 2)                    | NAB2    | 714209    |
| N-glycanase 1                                                        | NGLY1   | 700842    |
| NHL repeat containing 2                                              | NHLRC2  | 698009    |
| NHP2 ribonucleoprotein                                               | NHP2    | 701950    |
| Nicotinamide nucleotide transhydrogenase                             | NNT     | 701110    |
| Niemann-Pick disease, type C2                                        | NPC2    | 699881    |
| NIMA-related kinase 1                                                | NEK1    | 694345    |
| NIN1/RPN12 binding protein 1 homolog                                 | NOB1    | 705344    |
| Ninein                                                               | NIN     | 709532    |
| Ninjurin 1                                                           | NINJ1   | 717218    |
| Nitric oxide associated 1                                            | NOA1    | 693437    |
| NK2 homeobox 5                                                       | NKX2-5  | 703795    |
| NLR family, pyrin domain containing 6                                | NLRP6   | 720741    |
| NMD3 ribosome export adaptor                                         | NMD3    | 701677    |
| NME/NM23 nucleoside diphosphate kinase 2                             | NME2    | 100533960 |
| N-myc and STAT interactor                                            | NMI     | 694554    |
| N-myristoyltransferase 1                                             | NMT1    | 715885    |
| Non-POU domain containing, octamer-binding                           | NONO    | 697263    |
| Non-SMC condensin I complex subunit G                                | NCAPG   | 715235    |
| Non-SMC condensin II complex subunit D3                              | NCAPD3  | 700276    |
| Non-SMC condensin II complex subunit H2                              | NCAPH2  | 716120    |
| NOP16 nucleolar protein                                              | NOP16   | 696768    |
| NOP2/Sun RNA methyltransferase family member 5                       | NSUN5   | 716219    |
| NOP58 ribonucleoprotein                                              | NOP58   | 703859    |
| NOP9 nucleolar protein                                               | NOP9    | 715969    |
| Notch 4                                                              | NOTCH4  | 717323    |
| NPR2-like, GATOR1 complex subunit                                    | NPRL2   | 701924    |
| NRDE-2, necessary for RNA interference, domain containing            | NRDE2   | 695676    |
| NSA2, ribosome biogenesis homolog                                    | NSA2    | 704670    |
| NSE4 homolog A, SMC5-SMC6 complex component                          | NSMCE4A | 705375    |
| NSFL1 (p97) cofactor (p47)                                           | NSFL1C  | 715743    |
| N-terminal Xaa-Pro-Lys N-methyltransferase 1                         | NTMT1   | 716763    |
| Nth-like DNA glycosylase 1                                           | NTHL1   | 694848    |
| Nuclear casein kinase and cyclin-dependent kinase substrate 1        | NUCKS1  | 697298    |
| Nuclear envelope integral membrane protein 1                         | NEMP1   | 710700    |
| Nuclear factor of kappa light polypeptide gene enhancer in B-cells 1 | NFKB1   | 710324    |
| Nuclear factor, erythroid 2 like 1                                   | NFE2L1  | 695404    |
| Nuclear factor, erythroid 2 like 2                                   | NFE2L2  | 707606    |
| Nuclear fragile X mental retardation protein interacting protein 2   | NUFIP2  | 711330    |
| Nuclear receptor coactivator 2                                       | NCOA2   | 693455    |
| Nuclear receptor coactivator 4                                       | NCOA4   | 709509    |
| Nuclear receptor coactivator 6                                       | NCOA6   | 706903    |
| Nuclear receptor subfamily 1 group I member 2                        | NR1I2   | 574226    |
| Nuclear receptor subfamily 1 group I member 3                        | NR1I3   | 574249    |
| Nuclear receptor subfamily 2 group F member 2                        | NR2F2   | 707483    |

|                                                                           |         |        |
|---------------------------------------------------------------------------|---------|--------|
| Nuclear receptor subfamily 5 group A member 1                             | NR5A1   | 694183 |
| Nuclear RNA export factor 1                                               | NXF1    | 718420 |
| Nuclear RNA export factor 3                                               | NXF3    | 695351 |
| Nuclear transcription factor Y subunit gamma                              | NFYC    | 696290 |
| Nuclear transport factor 2-like export factor 1                           | NXT1    | 711846 |
| Nuclear transport factor 2-like export factor 2                           | NXT2    | 704593 |
| Nucleobindin 2                                                            | NUCB2   | 697084 |
| Nucleolar protein 10                                                      | NOL10   | 695849 |
| Nucleolar protein 8                                                       | NOL8    | 705799 |
| Nucleolar protein interacting with the FHA domain of MKI67                | NIFK    | 697198 |
| Nucleolin                                                                 | NCL     | 720965 |
| Nucleophosmin/nucleoplasmin 3                                             | NPM3    | 712300 |
| Nucleoporin 107kda                                                        | NUP107  | 718214 |
| Nucleoporin 205kda                                                        | NUP205  | 708216 |
| Nucleoporin 35kda                                                         | NUP35   | 706497 |
| Nucleoporin 37kda                                                         | NUP37   | 697933 |
| Nucleoporin 50kda                                                         | NUP50   | 713282 |
| Nucleoporin 85kda                                                         | NUP85   | 705628 |
| Nucleoporin 88kda                                                         | NUP88   | 711734 |
| Nucleosome assembly protein 1-like 5                                      | NAP1L5  | 703223 |
| Nude neurodevelopment protein 1                                           | NDE1    | 717754 |
| Nudix hydrolase 1                                                         | NUDT1   | 713078 |
| Nudix hydrolase 13                                                        | NUDT13  | 707796 |
| Nudix hydrolase 22                                                        | NUDT22  | 717864 |
| Nudix hydrolase 5                                                         | NUDT5   | 694368 |
| O-6-methylguanine-DNA methyltransferase                                   | MGMT    | 698134 |
| O-acyl-ADP-ribose deacylase 1                                             | OARD1   | 719685 |
| Occludin                                                                  | OCLN    | 700504 |
| Oculocerebrorenal syndrome of Lowe                                        | OCRL    | 702345 |
| Olfactomedin 2                                                            | OLFM2   | 711336 |
| Olfactomedin like 2B                                                      | OLFML2B | 720062 |
| Olfactomedin like 3                                                       | OLFML3  | 707969 |
| Olfactory receptor, family 2, subfamily AG, member 2                      | OR2AG2  | 709556 |
| Olfactory receptor, family 2, subfamily H, member 2                       | OR2H2   | 710946 |
| Olfactory receptor, family 5, subfamily F, member 1                       | OR5F1   | 709943 |
| Olfactory receptor, family 6, subfamily N, member 1                       | OR6N1   | 719958 |
| Olfactory receptor, family 7, subfamily D, member 4                       | OR7D4   | 721322 |
| Oligodendrocyte lineage transcription factor 2                            | OLIG2   | 700098 |
| Oligonucleotide/oligosaccharide-binding fold containing 1                 | OBFC1   | 714968 |
| Optic atrophy 3 (autosomal recessive, with chorea and spastic paraplegia) | OPA3    | 714806 |
| Oral-facial-digital syndrome 1                                            | OFD1    | 711677 |
| Origin recognition complex subunit 1                                      | ORC1    | 713271 |
| Origin recognition complex subunit 3                                      | ORC3    | 700773 |
| Origin recognition complex subunit 5                                      | ORC5    | 696683 |
| ORMDL sphingolipid biosynthesis regulator 2                               | ORMDL2  | 710296 |
| ORMDL sphingolipid biosynthesis regulator 3                               | ORMDL3  | 699154 |
| Ornithine aminotransferase                                                | OAT     | 693970 |

|                                                                   |         |           |
|-------------------------------------------------------------------|---------|-----------|
| Ornithine decarboxylase antizyme 1                                | OAZ1    | 721477    |
| O-sialoglycoprotein endopeptidase                                 | OSGEP   | 702512    |
| Oxidized low density lipoprotein (lectin-like) receptor 1         | OLR1    | 717596    |
| Oxysterol binding protein                                         | OSBP    | 699325    |
| Oxysterol binding protein like 8                                  | OSBPL8  | 693338    |
| P450 (cytochrome) oxidoreductase                                  | POR     | 715888    |
| PAN2 poly(A) specific ribonuclease subunit                        | PAN2    | 712478    |
| Pancreatic polypeptide                                            | PPY     | 713988    |
| Pantothenate kinase 1                                             | PANK1   | 696041    |
| Pantothenate kinase 4                                             | PANK4   | 694804    |
| PAP associated domain containing 7                                | PAPD7   | 713853    |
| Par-3 family cell polarity regulator                              | PARD3   | 706472    |
| Paraoxonase 2                                                     | PON2    | 699107    |
| Paraspeckle component 1                                           | PSPC1   | 705080    |
| Parkinson protein 7                                               | PARK7   | 708377    |
| Paternally expressed 3                                            | PEG3    | 707825    |
| PAX3 and PAX7 binding protein 1                                   | PAXBP1  | 700489    |
| PAXIP1 associated glutamate-rich protein 1                        | PAGR1   | 706839    |
| PC-esterase domain containing 1A                                  | PCED1A  | 716956    |
| PDZ domain containing 4                                           | PDZD4   | 697387    |
| PDZ domain containing ring finger 3                               | PDZRN3  | 709901    |
| Peptidase (mitochondrial processing) alpha                        | PMPCA   | 721742    |
| Peptidase domain containing associated with muscle regeneration 1 | PAMR1   | 717140    |
| Peptide deformylase (mitochondrial)                               | PDF     | 100427224 |
| Peptidoglycan recognition protein 1                               | PGLYRP1 | 718480    |
| Peptidylprolyl isomerase domain and WD repeat containing 1        | PPWD1   | 696267    |
| Peptidylprolyl isomerase E (cyclophilin E)                        | PPIE    | 716340    |
| Peptidylprolyl isomerase G (cyclophilin G)                        | PPIG    | 706262    |
| Peptidylprolyl isomerase H (cyclophilin H)                        | PPIH    | 697669    |
| Peptidylprolyl isomerase like 3                                   | PPIL3   | 700456    |
| Periaxin                                                          | PRX     | 702329    |
| Peroxiredoxin 2                                                   | PRDX2   | 716665    |
| Peroxiredoxin 3                                                   | PRDX3   | 702882    |
| Peroxiredoxin 4                                                   | PRDX4   | 697635    |
| Peroxiredoxin 6                                                   | PRDX6   | 706486    |
| Peroxisomal biogenesis factor 11 beta                             | PEX11B  | 698184    |
| Peroxisomal membrane protein 2                                    | PXMP2   | 693648    |
| Peroxisome proliferator-activated receptor delta                  | PPARD   | 718861    |
| PHD finger protein 1                                              | PHF1    | 718337    |
| PHD finger protein 14                                             | PHF14   | 694855    |
| PHD finger protein 2                                              | PHF2    | 717585    |
| PHD finger protein 23                                             | PHF23   | 714538    |
| PHD finger protein 6                                              | PHF6    | 707390    |
| PHD finger protein 7                                              | PHF7    | 697103    |
| Phenylalanyl-trna synthetase 2, mitochondrial                     | FARS2   | 710945    |
| Phorbol-12-myristate-13-acetate-induced protein 1                 | PMAIP1  | 702789    |
| Phosphatase and actin regulator 2                                 | PHACTR2 | 700363    |

|                                                                                                                                    |          |           |
|------------------------------------------------------------------------------------------------------------------------------------|----------|-----------|
| Phosphatase, orphan 1                                                                                                              | PHOSPHO1 | 698959    |
| Phosphatase, orphan 2                                                                                                              | PHOSPHO2 | 100429656 |
| Phosphate cytidylyltransferase 1, choline, alpha                                                                                   | PCYT1A   | 722105    |
| Phosphatidylglycerophosphate synthase 1                                                                                            | PGS1     | 710125    |
| Phosphatidylinositol 3-kinase catalytic subunit type 3                                                                             | PIK3C3   | 693918    |
| Phosphatidylinositol 4-kinase, catalytic, alpha                                                                                    | PI4KA    | 698020    |
| Phosphatidylinositol 4-kinase, catalytic, beta                                                                                     | PI4KB    | 710104    |
| Phosphatidylinositol glycan anchor biosynthesis class A                                                                            | PIGA     | 712514    |
| Phosphatidylinositol glycan anchor biosynthesis class C                                                                            | PIGC     | 705657    |
| Phosphatidylinositol glycan anchor biosynthesis class F                                                                            | PIGF     | 714844    |
| Phosphatidylinositol glycan anchor biosynthesis class G                                                                            | PIGG     | 714088    |
| Phosphatidylinositol glycan anchor biosynthesis class H                                                                            | PIGH     | 710780    |
| Phosphatidylinositol glycan anchor biosynthesis class S                                                                            | PIGS     | 709115    |
| Phosphatidylinositol transfer protein alpha                                                                                        | PITPNA   | 721228    |
| Phosphatidylinositol transfer protein beta                                                                                         | PITPNB   | 713414    |
| Phosphatidylinositol transfer protein, membrane associated 1                                                                       | PITPNM1  | 721716    |
| Phosphatidylinositol transfer protein, membrane associated 2                                                                       | PITPNM2  | 703969    |
| Phosphodiesterase 11A                                                                                                              | PDE11A   | 702458    |
| Phosphodiesterase 12                                                                                                               | PDE12    | 703552    |
| Phosphodiesterase 5A                                                                                                               | PDE5A    | 705592    |
| Phosphodiesterase 8A                                                                                                               | PDE8A    | 694750    |
| Phosphofurin acidic cluster sorting protein 1                                                                                      | PACS1    | 714696    |
| Phosphohistidine phosphatase 1                                                                                                     | PHPT1    | 721674    |
| Phosphoinositide-3-kinase regulatory subunit 4                                                                                     | PIK3R4   | 718012    |
| Phospholipase A2 group XVI                                                                                                         | PLA2G16  | 722178    |
| Phospholipase B domain containing 1                                                                                                | PLBD1    | 698939    |
| Phospholipase C delta 1                                                                                                            | PLCD1    | 696860    |
| Phospholipase D family member 3                                                                                                    | PLD3     | 701083    |
| Phospholipase D family member 4                                                                                                    | PLD4     | 707527    |
| Phospholipase D family member 5                                                                                                    | PLD5     | 706256    |
| Phospholipid phosphatase 2                                                                                                         | PLPP2    | 721004    |
| Phospholipid phosphatase 6                                                                                                         | PLPP6    | 695188    |
| Phosphopantothenoylcysteine decarboxylase                                                                                          | PPCDC    | 704015    |
| Phosphopantothenoylcysteine synthetase                                                                                             | PPCS     | 697064    |
| Phosphoribosyl pyrophosphate synthetase 1                                                                                          | PRPS1    | 702529    |
| Phosphoribosyl pyrophosphate synthetase-associated protein 1                                                                       | PRPSAP1  | 706625    |
| Phosphoribosylglycinamide formyltransferase, phospho<br>ribosylglycinamide synthetase, phosphoribosylamino<br>imidazole synthetase | GART     | 704926    |
| Phosphorylase kinase, alpha 2 (liver)                                                                                              | PHKA2    | 694376    |
| Phosphorylase, glycogen, liver                                                                                                     | PYGL     | 706853    |
| Phosphorylase, glycogen, muscle                                                                                                    | PYGM     | 717451    |
| Phytanoyl-coa 2-hydroxylase interacting protein                                                                                    | PHYHIP   | 715990    |
| Piggybac transposable element derived 1                                                                                            | PGBD1    | 707252    |
| PIH1 domain containing 1                                                                                                           | PIH1D1   | 718787    |
| Pirin                                                                                                                              | PIR      | 720959    |
| Pituitary tumor-transforming 1                                                                                                     | PTTG1    | 696143    |
| Plakophilin 2                                                                                                                      | PKP2     | 100429376 |

|                                                               |         |           |
|---------------------------------------------------------------|---------|-----------|
| Plasminogen receptor, C-terminal lysine transmembrane protein | PLGRKT  | 693286    |
| Plastin 3                                                     | PLS3    | 709055    |
| Platelet derived growth factor C                              | PDGFC   | 700236    |
| Platelet derived growth factor D                              | PDGFD   | 704310    |
| Platelet-derived growth factor beta polypeptide               | PDGFB   | 703173    |
| Pleckstrin homology domain containing A1                      | PLEKHA1 | 705731    |
| Pleckstrin homology domain containing A3                      | PLEKHA3 | 703417    |
| Pleckstrin homology domain containing O2                      | PLEKHO2 | 712677    |
| Pleckstrin homology domain interacting protein                | PHIP    | 716810    |
| Plexin A2                                                     | PLXNA2  | 713800    |
| Plexin B3                                                     | PLXNB3  | 696903    |
| Pogo transposable element with ZNF domain                     | POGZ    | 710634    |
| Poliovirus receptor-related 2 (herpesvirus entry mediator B)  | PVRL2   | 713229    |
| Poly(A) binding protein interacting protein 1                 | PAIP1   | 700869    |
| Poly(A) binding protein interacting protein 2                 | PAIP2   | 693317    |
| Poly(A) binding protein, cytoplasmic 1                        | PABPC1  | 705847    |
| Poly(A) binding protein, cytoplasmic 3                        | PABPC3  | 708617    |
| Poly(A) polymerase gamma                                      | PAPOLG  | 717781    |
| Poly(ADP-ribose) glycohydrolase                               | PARG    | 709432    |
| Poly(ADP-ribose) polymerase 2                                 | PARP2   | 701955    |
| Poly(rc) binding protein 2                                    | PCBP2   | 703175    |
| Polycomb group ring finger 2                                  | PCGF2   | 694187    |
| Polycomb group ring finger 6                                  | PCGF6   | 714508    |
| Polyglutamine binding protein 1                               | PQBP1   | 711678    |
| Polyhomeotic homolog 2 (Drosophila)                           | PHC2    | 710201    |
| Polymerase (DNA directed) kappa                               | POLK    | 705713    |
| Polymerase (DNA directed), beta                               | POLB    | 704801    |
| Polymerase (DNA directed), gamma                              | POLG    | 699750    |
| Polymerase (RNA) I polypeptide C                              | POLR1C  | 700727    |
| Polymerase (RNA) II (DNA directed) polypeptide C, 33kda       | POLR2C  | 704555    |
| Polymerase (RNA) II (DNA directed) polypeptide F              | POLR2F  | 699566    |
| Polymerase (RNA) II (DNA directed) polypeptide G              | POLR2G  | 718548    |
| Polymerase (RNA) II (DNA directed) polypeptide H              | POLR2H  | 100429040 |
| Polymerase (RNA) II (DNA directed) polypeptide I, 14.5kda     | POLR2I  | 712412    |
| Polymerase (RNA) III (DNA directed) polypeptide B             | POLR3B  | 702711    |
| Polymerase (RNA) III (DNA directed) polypeptide C (62kd)      | POLR3C  | 696943    |
| Polypeptide N-acetylgalactosaminyltransferase 1               | GALNT1  | 708930    |
| Polysaccharide biosynthesis domain containing 1               | PBDC1   | 705125    |
| POP5 homolog, ribonuclease P/MRP subunit                      | POP5    | 697559    |
| Post-GPI attachment to proteins 3                             | PGAP3   | 697699    |
| Potassium channel tetramerization domain containing 2         | KCTD2   | 700474    |
| Potassium channel tetramerization domain containing 6         | KCTD6   | 701810    |
| Potassium channel tetramerization domain containing 9         | KCTD9   | 711515    |
| Potassium channel, inwardly rectifying subfamily J, member 11 | KCNJ11  | 696722    |
| Potassium channel, inwardly rectifying subfamily J, member 5  | KCNJ5   | 714799    |
| Potassium channel, inwardly rectifying subfamily J, member 8  | KCNJ8   | 706369    |
| Potassium channel, two pore domain subfamily K, member 16     | KCNK16  | 719585    |
| Potassium channel, voltage gated eag related subfamily H,     | KCNH3   | 710838    |

|                                                                     |         |           |
|---------------------------------------------------------------------|---------|-----------|
| member 3                                                            |         |           |
| Potassium channel, voltage gated Shaw related subfamily C, member 2 | KCNC2   | 100430904 |
| Potassium voltage-gated channel, modifier subfamily S, member 1     | KCNS1   | 711715    |
| PR domain containing 1, with ZNF domain                             | PRDM1   | 696757    |
| PR domain containing 2, with ZNF domain                             | PRDM2   | 716295    |
| PR domain containing 4                                              | PRDM4   | 704529    |
| Praja ring finger 1, E3 ubiquitin protein ligase                    | PJA1    | 695038    |
| Pre-B-cell leukemia homeobox 4                                      | PBX4    | 106994672 |
| Prefoldin subunit 2                                                 | PFDN2   | 719886    |
| Prefoldin subunit 5                                                 | PFDN5   | 702355    |
| Prefoldin subunit 6                                                 | PFDN6   | 718253    |
| Pre-mrna processing factor 40 homolog A                             | PRPF40A | 696668    |
| Presenilin 1                                                        | PSEN1   | 696274    |
| Presenilin enhancer gamma secretase subunit                         | PSENEN  | 100429008 |
| Presequence translocase-associated motor 16 homolog (S. Cerevisiae) | PAM16   | 704987    |
| Prion protein                                                       | PRNP    | 717859    |
| Progesterone receptor membrane component 1                          | PGRMC1  | 711792    |
| Progestin and adipoq receptor family member VIII                    | PAQR8   | 708418    |
| Programmed cell death 2                                             | PDCD2   | 696380    |
| Programmed cell death 2-like                                        | PDCD2L  | 705688    |
| Programmed cell death 5                                             | PDCD5   | 702277    |
| Programmed cell death 6                                             | PDCD6   | 723043    |
| Programmed cell death 7                                             | PDCD7   | 708758    |
| Prohibitin                                                          | PHB     | 699334    |
| Prohibitin 2                                                        | PHB2    | 714693    |
| Prolactin releasing hormone                                         | PRLH    | 694941    |
| Proliferating cell nuclear antigen                                  | PCNA    | 718006    |
| Proline and serine rich 1                                           | PROSER1 | 696606    |
| Proline rich 15                                                     | PRR15   | 696869    |
| Proline rich 3                                                      | PRR3    | 711699    |
| Proline rich Gla (G-carboxyglutamic acid) 1                         | PRRG1   | 696938    |
| Proline, glutamate and leucine rich protein 1                       | PELP1   | 677854    |
| Proline/serine-rich coiled-coil 1                                   | PSRC1   | 698060    |
| Proline-rich coiled-coil 1                                          | PRRC1   | 704248    |
| Prolyl 4-hydroxylase, alpha polypeptide II                          | P4HA2   | 707157    |
| Prolylcarboxypeptidase                                              | PRCP    | 701305    |
| Proopiomelanocortin                                                 | POMC    | 694430    |
| Propionyl-coa carboxylase beta subunit                              | PCCB    | 716964    |
| Prostaglandin D2 receptor (DP)                                      | PTGDR   | 707918    |
| Prostaglandin D2 receptor 2                                         | PTGDR2  | 695853    |
| Prostaglandin D2 synthase                                           | PTGDS   | 707990    |
| Proteasomal ATPase associated factor 1                              | PAAF1   | 718755    |
| Proteasome (prosome, macropain) assembly chaperone 1                | PSMG1   | 715758    |
| Proteasome (prosome, macropain) assembly chaperone 2                | PSMG2   | 717110    |
| Proteasome (prosome, macropain) assembly chaperone 3                | PSMG3   | 697590    |

|                                                                              |           |        |
|------------------------------------------------------------------------------|-----------|--------|
| Proteasome 26S subunit, ATPase 4                                             | PSMC4     | 699847 |
| Proteasome 26S subunit, non-ATPase 1                                         | PSMD1     | 711724 |
| Proteasome 26S subunit, non-ATPase 12                                        | PSMD12    | 718756 |
| Proteasome 26S subunit, non-ATPase 6                                         | PSMD6     | 698601 |
| Proteasome 26S subunit, non-ATPase 7                                         | PSMD7     | 705581 |
| Proteasome activator subunit 2                                               | PSME2     | 715288 |
| Proteasome subunit alpha 2                                                   | PSMA2     | 701683 |
| Proteasome subunit alpha 3                                                   | PSMA3     | 700251 |
| Proteasome subunit alpha 4                                                   | PSMA4     | 710417 |
| Proteasome subunit alpha 5                                                   | PSMA5     | 698435 |
| Proteasome subunit alpha 6                                                   | PSMA6     | 695113 |
| Proteasome subunit beta 10                                                   | PSMB10    | 701088 |
| Proteasome subunit beta 2                                                    | PSMB2     | 712193 |
| Proteasome subunit beta 4                                                    | PSMB4     | 710734 |
| Proteasome subunit beta 7                                                    | PSMB7     | 694567 |
| Proteasome subunit beta 9                                                    | PSMB9     | 716980 |
| Protection of telomeres 1                                                    | POT1      | 696751 |
| Protein disulfide isomerase family A member 5                                | PDIA5     | 715226 |
| Protein kinase C, gamma                                                      | PRKCG     | 720263 |
| Protein kinase, AMP-activated, alpha 2 catalytic subunit                     | PRKAA2    | 717703 |
| Protein kinase, AMP-activated, beta 1 non-catalytic subunit                  | PRKAB1    | 695737 |
| Protein kinase, interferon-inducible double stranded RNA dependent activator | PRKRA     | 703063 |
| Protein odr-4 homolog                                                        | C1H1orf27 | 713801 |
| Protein O-glucosyltransferase 1                                              | POGLUT1   | 712357 |
| Protein phosphatase 1 regulatory subunit 12C                                 | PPP1R12C  | 698538 |
| Protein phosphatase 1 regulatory subunit 15A                                 | PPP1R15A  | 718350 |
| Protein phosphatase 1 regulatory subunit 35                                  | PPP1R35   | 712067 |
| Protein phosphatase 2 regulatory subunit B', gamma                           | PPP2R5C   | 718894 |
| Protein phosphatase 2 regulatory subunit B'', gamma                          | PPP2R3C   | 694616 |
| Protein phosphatase 2, catalytic subunit, beta isozyme                       | PPP2CB    | 695118 |
| Protein phosphatase 3, catalytic subunit, gamma isozyme                      | PPP3CC    | 708233 |
| Protein phosphatase, Mg <sup>2+</sup> /Mn <sup>2+</sup> dependent 1A         | PPM1A     | 702987 |
| Protein phosphatase, Mg <sup>2+</sup> /Mn <sup>2+</sup> dependent 1B         | PPM1B     | 713918 |
| Protein phosphatase, Mg <sup>2+</sup> /Mn <sup>2+</sup> dependent 1F         | PPM1F     | 698441 |
| Protein phosphatase, Mg <sup>2+</sup> /Mn <sup>2+</sup> dependent 1G         | PPM1G     | 700695 |
| Protein serine kinase H1                                                     | PSKH1     | 700845 |
| Protein tyrosine kinase 2 beta                                               | PTK2B     | 712787 |
| Protein tyrosine phosphatase type IVA, member 2                              | PTP4A2    | 706489 |
| Protein tyrosine phosphatase, non-receptor type 1                            | PTPN1     | 702016 |
| Protein tyrosine phosphatase, non-receptor type 12                           | PTPN12    | 721538 |
| Protein tyrosine phosphatase, non-receptor type 4 (megakaryocyte)            | PTPN4     | 695516 |
| Proteinase 3                                                                 | PRTN3     | 721131 |
| Protein-L-isoaspartate (D-aspartate) O-methyltransferase                     | PCMT1     | 695893 |
| Proteoglycan 3                                                               | PRG3      | 706381 |
| Protocadherin alpha 5                                                        | PCDHA5    | 692083 |
| Protocadherin alpha 7                                                        | PCDHA7    | 698370 |



|                                                            |          |           |
|------------------------------------------------------------|----------|-----------|
| Protoporphyrinogen oxidase                                 | PPOX     | 719910    |
| Pumilio RNA binding family member 1                        | PUM1     | 704848    |
| Pumilio RNA binding family member 2                        | PUM2     | 701782    |
| PWP2 periodic tryptophan protein homolog (yeast)           | PWP2     | 722216    |
| Pyruvate dehydrogenase (lipoamide) alpha 1                 | PDHA1    | 100423992 |
| Pyruvate dehydrogenase (lipoamide) beta                    | PDHB     | 574227    |
| Rab geranylgeranyltransferase, beta subunit                | RABGGTB  | 705421    |
| RAB, member of RAS oncogene family-like 2B                 | RABL2B   | 716615    |
| RAB11B, member RAS oncogene family                         | RAB11B   | 707462    |
| RAB18, member RAS oncogene family                          | RAB18    | 708843    |
| RAB19, member RAS oncogene family                          | RAB19    | 716684    |
| RAB23, member RAS oncogene family                          | RAB23    | 712860    |
| RAB30, member RAS oncogene family                          | RAB30    | 701550    |
| RAB38, member RAS oncogene family                          | RAB38    | 705189    |
| RAB3A interacting protein                                  | RAB3IP   | 717215    |
| RAB4A, member RAS oncogene family                          | RAB4A    | 694288    |
| RAB5A, member RAS oncogene family                          | RAB5A    | 697712    |
| RAB5B, member RAS oncogene family                          | RAB5B    | 708347    |
| RAB6A, member RAS oncogene family                          | RAB6A    | 718717    |
| Rac gtpase activating protein 1                            | RACGAP1  | 711887    |
| RAD17 checkpoint clamp loader component                    | RAD17    | 700116    |
| RAD50 interactor 1                                         | RINT1    | 698414    |
| RAD51 associated protein 1                                 | RAD51AP1 | 710918    |
| RAD51 paralog C                                            | RAD51C   | 714828    |
| RAD52 motif containing 1                                   | RDM1     | 716624    |
| RAD9 checkpoint clamp component A                          | RAD9A    | 712345    |
| RAD9-HUS1-RAD1 interacting nuclear orphan 1                | RHNO1    | 709008    |
| Raf-1 proto-oncogene, serine/threonine kinase              | RAF1     | 694725    |
| Raftlin, lipid raft linker 1                               | RFTN1    | 695142    |
| Ral GEF with PH domain and SH3 binding motif 1             | RALGPS1  | 708253    |
| Ral gtpase activating protein, alpha subunit 1 (catalytic) | RALGAPA1 | 695674    |
| Ral guanine nucleotide dissociation stimulator             | RALGDS   | 714436    |
| RALBP1 associated Eps domain containing 2                  | REPS2    | 721024    |
| RALY heterogeneous nuclear ribonucleoprotein               | RALY     | 713317    |
| RAN binding protein 10                                     | RANBP10  | 700911    |
| RAN binding protein 6                                      | RANBP6   | 715799    |
| RAN guanine nucleotide release factor                      | RANGRF   | 717206    |
| Rap guanine nucleotide exchange factor 2                   | RAPGEF2  | 704717    |
| RAS and EF-hand domain containing                          | RASEF    | 708296    |
| Ras association (ralgds/AF-6) domain family member 4       | RASSF4   | 706096    |
| Ras homolog enriched in brain like 1                       | RHEBL1   | 709384    |
| Ras homolog family member C                                | RHOC     | 706034    |
| Ras homolog family member D                                | RHOD     | 712969    |
| Ras homolog family member J                                | RHOJ     | 705603    |
| Ras homolog family member V                                | RHOV     | 704675    |
| RAS p21 protein activator (gtpase activating protein) 1    | RASA1    | 694085    |
| RAS protein activator like 2                               | RASAL2   | 718958    |
| Rasgef domain family member 1C                             | RASGEF1C | 706085    |

|                                                            |          |           |
|------------------------------------------------------------|----------|-----------|
| RAS-like family 10 member A                                | RASL10A  | 714587    |
| Ras-like without CAAX 1                                    | RIT1     | 717985    |
| Ras-related associated with diabetes                       | RRAD     | 695086    |
| Ras-related GTP binding C                                  | RRAGC    | 715549    |
| RB1 inducible coiled-coil 1                                | RB1CC1   | 710330    |
| Rearranged L-myc fusion                                    | RLF      | 693503    |
| Receptor (G protein-coupled) activity modifying protein 1  | RAMP1    | 574329    |
| Receptor interacting serine/threonine kinase 4             | RIPK4    | 715077    |
| Recombination activating gene 1                            | RAG1     | 697322    |
| Recq helicase-like                                         | RECQL    | 705871    |
| Regenerating family member 3 gamma                         | REG3G    | 711637    |
| Regucalcin                                                 | RGN      | 705733    |
| Regulation of nuclear pre-mrna domain containing 1A        | RPRD1A   | 709217    |
| Regulator of G-protein signaling 7                         | RGS7     | 707747    |
| Regulator of G-protein signaling like 1                    | RGSL1    | 715693    |
| Regulator of microtubule dynamics 1                        | RMDN1    | 694237    |
| Renin                                                      | REN      | 574299    |
| Replication protein A3                                     | RPA3     | 696248    |
| Replication timing regulatory factor 1                     | RIF1     | 694817    |
| REST corepressor 3                                         | RCOR3    | 712037    |
| Retbindin                                                  | RTBDN    | 716766    |
| Reticulon 4                                                | RTN4     | 619181    |
| Reticulon 4 interacting protein 1                          | RTN4IP1  | 697236    |
| Retinal outer segment membrane protein 1                   | ROM1     | 100426296 |
| Retinaldehyde binding protein 1                            | RLBP1    | 699510    |
| Retinoblastoma binding protein 4                           | RBBP4    | 708710    |
| Retinoblastoma binding protein 8                           | RBBP8    | 677718    |
| Retinoic acid induced 1                                    | RAI1     | 699215    |
| Retinoid X receptor gamma                                  | RXRG     | 694807    |
| Retinol dehydrogenase 10 (all-trans)                       | RDH10    | 695791    |
| Retinol dehydrogenase 5 (11-cis/9-cis)                     | RDH5     | 709644    |
| Reversion-inducing-cysteine-rich protein with kazal motifs | RECK     | 694043    |
| REX1, RNA exonuclease 1 homolog                            | REXO1    | 708931    |
| RFT1 homolog                                               | RFT1     | 694586    |
| Rho family gtpase 3                                        | RND3     | 694168    |
| Rho gtpase activating protein 21                           | ARHGAP21 | 706428    |
| Rho guanine nucleotide exchange factor 1                   | ARHGEF1  | 722198    |
| Rho guanine nucleotide exchange factor 10                  | ARHGEF10 | 722745    |
| Rhomboid 5 homolog 2 (Drosophila)                          | RHBDF2   | 707033    |
| Ribonuclease P/MRP 21kda subunit                           | RPP21    | 713056    |
| Ribonuclease P/MRP 40kda subunit                           | RPP40    | 710505    |
| Ribonuclease T2                                            | RNASET2  | 706533    |
| Ribonuclease, rnase A family, k6                           | RNASE6   | 704579    |
| Ribophorin II                                              | RPN2     | 708971    |
| Ribosomal modification protein rimk-like family member A   | RIMKLA   | 699767    |
| Ribosomal protein l10a                                     | RPL10A   | 718783    |
| Ribosomal protein L17                                      | RPL17    | 698967    |
| Ribosomal protein L22                                      | RPL22    | 703050    |

|                                                                 |          |           |
|-----------------------------------------------------------------|----------|-----------|
| Ribosomal protein L23                                           | RPL23    | 694719    |
| Ribosomal protein l23a                                          | RPL23A   | 710490    |
| Ribosomal protein L24                                           | RPL24    | 702381    |
| Ribosomal protein L26                                           | RPL26    | 717378    |
| Ribosomal protein L26 like 1                                    | RPL26L1  | 703230    |
| Ribosomal protein L27                                           | RPL27    | 712352    |
| Ribosomal protein l27a                                          | RPL27A   | 708863    |
| Ribosomal protein L3                                            | RPL3     | 707176    |
| Ribosomal protein L35                                           | RPL35    | 693604    |
| Ribosomal protein l35a                                          | RPL35A   | 714858    |
| Ribosomal protein L4                                            | RPL4     | 710590    |
| Ribosomal protein l7a                                           | RPL7A    | 722215    |
| Ribosomal protein L8                                            | RPL8     | 708535    |
| Ribosomal protein S10                                           | RPS10    | 718606    |
| Ribosomal protein S11                                           | RPS11    | 718844    |
| Ribosomal protein S13                                           | RPS13    | 697513    |
| Ribosomal protein S14                                           | RPS14    | 710901    |
| Ribosomal protein S16                                           | RPS16    | 697219    |
| Ribosomal protein S17-like                                      | RPS17L   | 100425104 |
| Ribosomal protein S19 binding protein 1                         | RPS19BP1 | 704079    |
| Ribosomal protein S2                                            | RPS2     | 693615    |
| Ribosomal protein S21                                           | RPS21    | 699565    |
| Ribosomal protein S27                                           | RPS27    | 106992520 |
| Ribosomal protein S27 like                                      | RPS27L   | 705483    |
| Ribosomal protein s27a                                          | RPS27A   | 718909    |
| Ribosomal protein S28                                           | RPS28    | 707133    |
| Ribosomal protein S4, X-linked                                  | RPS4X    | 699397    |
| Ribosomal protein S5                                            | RPS5     | 711259    |
| Ribosomal protein S7                                            | RPS7     | 721900    |
| Ribosomal protein S8                                            | RPS8     | 703957    |
| Ribosomal protein, large, P0                                    | RPLP0    | 574363    |
| Ribosomal protein, large, P1                                    | RPLP1    | 695442    |
| Ribosomal protein, large, P2                                    | RPLP2    | 700698    |
| Ribosomal RNA adenine dimethylase domain containing 1           | RRNAD1   | 718599    |
| Ribosomal RNA processing 12 homolog                             | RRP12    | 705854    |
| Ribosomal RNA processing 8, methyltransferase, homolog (yeast)  | RRP8     | 712011    |
| Ribosome production factor 1 homolog                            | RPF1     | 710286    |
| Ring finger and WD repeat domain 2, E3 ubiquitin protein ligase | RFWD2    | 708802    |
| Ring finger protein (C3H2C3 type) 6                             | RNF6     | 721550    |
| Ring finger protein 10                                          | RNF10    | 697428    |
| Ring finger protein 112                                         | RNF112   | 703312    |
| Ring finger protein 115                                         | RNF115   | 697067    |
| Ring finger protein 130                                         | RNF130   | 715356    |
| Ring finger protein 14                                          | RNF14    | 705363    |
| Ring finger protein 146                                         | RNF146   | 712152    |
| Ring finger protein 152                                         | RNF152   | 699091    |
| Ring finger protein 167                                         | RNF167   | 710656    |
| Ring finger protein 182                                         | RNF182   | 707517    |

|                                                                            |          |           |
|----------------------------------------------------------------------------|----------|-----------|
| Ring finger protein 185                                                    | RNF185   | 718351    |
| Ring finger protein 219                                                    | RNF219   | 697577    |
| Ring finger protein 34, E3 ubiquitin protein ligase                        | RNF34    | 700062    |
| Ring finger protein 38                                                     | RNF38    | 693346    |
| RNA 2',3'-cyclic phosphate and 5'-OH ligase                                | RTCB     | 717258    |
| RNA binding motif protein 10                                               | RBM10    | 711791    |
| RNA binding motif protein 15                                               | RBM15    | 701414    |
| RNA binding motif protein 17                                               | RBM17    | 712996    |
| RNA binding motif protein 22                                               | RBM22    | 712713    |
| RNA binding motif protein 38                                               | RBM38    | 696583    |
| RNA binding motif protein 39                                               | RBM39    | 704198    |
| RNA binding motif protein 45                                               | RBM45    | 702714    |
| RNA binding motif protein 5                                                | RBM5     | 704114    |
| RNA exonuclease 2                                                          | REXO2    | 695292    |
| RNA polymerase II associated protein 3                                     | RPAP3    | 703749    |
| RNA pseudouridylate synthase domain containing 3                           | RPUSD3   | 700349    |
| RPTOR independent companion of MTOR, complex 2                             | RICTOR   | 694915    |
| Runt-related transcription factor 1; translocated to, 1 (cyclin D-related) | RUNX1T1  | 696934    |
| Ruvb-like AAA ATPase 2                                                     | RUVBL2   | 100428792 |
| RWD domain containing 2A                                                   | RWDD2A   | 694598    |
| RWD domain containing 3                                                    | RWDD3    | 709817    |
| SAC1 suppressor of actin mutations 1-like (yeast)                          | SACM1L   | 714107    |
| SAGA complex associated factor 29                                          | SGF29    | 709124    |
| SAM and SH3 domain containing 3                                            | SASH3    | 702089    |
| Sarcoglycan epsilon                                                        | SGCE     | 700104    |
| Sarcolemma associated protein                                              | SLMAP    | 703086    |
| Scm-like with four mbt domains 1                                           | SFMBT1   | 694961    |
| SCY1-like, kinase-like 2                                                   | SCYL2    | 695284    |
| SCY1-like, kinase-like 3                                                   | SCYL3    | 701768    |
| SEC13 homolog, nuclear pore and COPII coat complex component               | SEC13    | 697339    |
| SEC22 homolog A, vesicle trafficking protein                               | SEC22A   | 715277    |
| SEC22 homolog C, vesicle trafficking protein                               | SEC22C   | 716351    |
| Sec23 homolog B, COPII coat complex component                              | SEC23B   | 698440    |
| SEC24 homolog C, COPII coat complex component                              | SEC24C   | 714688    |
| SEC31 homolog A, COPII coat complex component                              | SEC31A   | 693687    |
| Sec61 translocon alpha 1 subunit                                           | SEC61A1  | 709787    |
| Sec61 translocon alpha 2 subunit                                           | SEC61A2  | 100427728 |
| Sec61 translocon beta subunit                                              | SEC61B   | 717815    |
| Sec61 translocon gamma subunit                                             | SEC61G   | 716898    |
| Secernin 3                                                                 | SCRN3    | 698199    |
| SECIS binding protein 2                                                    | SECISBP2 | 697442    |
| Secreted frizzled-related protein 1                                        | SFRP1    | 702876    |
| Secretion associated, Ras related gtpase 1A                                | SAR1A    | 711277    |
| Sel-1 suppressor of lin-12-like 3 (C. Elegans)                             | SEL1L3   | 695033    |
| Selectin P                                                                 | SELP     | 701277    |
| Selenoprotein K                                                            | SELK     | 693421    |

|                                                                  |           |           |
|------------------------------------------------------------------|-----------|-----------|
| Selenoprotein M                                                  | SELM      | 718290    |
| Semenogelin I pseudogene                                         | SEMG1P    | 100424776 |
| Serglycin                                                        | SRGN      | 712299    |
| Serine carboxypeptidase 1                                        | SCPEP1    | 708197    |
| Serine dehydratase-like                                          | SDSL      | 714721    |
| Serine hydroxymethyltransferase 1 (soluble)                      | SHMT1     | 701186    |
| Serine incorporator 1                                            | SERINC1   | 713999    |
| Serine palmitoyltransferase small subunit A                      | SPTSSA    | 717580    |
| Serine peptidase inhibitor, Kunitz type, 2                       | SPINT2    | 714755    |
| Serine/arginine-rich splicing factor 1                           | SRSF1     | 713958    |
| Serine/arginine-rich splicing factor 12                          | SRSF12    | 700497    |
| Serine/arginine-rich splicing factor 3                           | SRSF3     | 719123    |
| Serine/arginine-rich splicing factor 4                           | SRSF4     | 717401    |
| Serine/arginine-rich splicing factor 5                           | SRSF5     | 712867    |
| Serine/arginine-rich splicing factor 7                           | SRSF7     | 713388    |
| Serine/arginine-rich splicing factor 8                           | SRSF8     | 699079    |
| Serine/threonine kinase 3                                        | STK3      | 707425    |
| Serine/threonine protein kinase 26                               | STK26     | 707739    |
| Serine/threonine/tyrosine kinase 1                               | STYK1     | 717844    |
| Serpin peptidase inhibitor, clade B (ovalbumin), member 1        | SERPINB1  | 707471    |
| Serpin peptidase inhibitor, clade B (ovalbumin), member 11       | SERPINB11 | 701449    |
| Serpin peptidase inhibitor, clade G (C1 inhibitor), member 1     | SERPING1  | 703928    |
| Serpin peptidase inhibitor, clade I (neuroserpin), member 1      | SERPINI1  | 699483    |
| SERPINE1 mrna binding protein 1                                  | SERBP1    | 700797    |
| Serum amyloid A like 1                                           | SAAL1     | 695747    |
| Sestrin 1                                                        | SESN1     | 700232    |
| SET and MYND domain containing 2                                 | SMYD2     | 709375    |
| SET and MYND domain containing 3                                 | SMYD3     | 703402    |
| SET domain containing 2                                          | SETD2     | 711825    |
| SET domain containing 5                                          | SETD5     | 704174    |
| SET domain containing 9                                          | SETD9     | 708019    |
| SFI1 centrin binding protein                                     | SFI1      | 716833    |
| SFT2 domain containing 3                                         | SFT2D3    | 699830    |
| SGT1 homolog, MIS12 kinetochore complex assembly<br>cochaperone  | SUGT1     | 694046    |
| SH2B adaptor protein 2                                           | SH2B2     | 714861    |
| SH3 domain binding glutamate-rich protein                        | SH3BGR    | 722581    |
| SH3 domain containing ring finger 1                              | SH3RF1    | 694082    |
| SH3-domain binding protein 1                                     | SH3BP1    | 700647    |
| SH3-domain binding protein 4                                     | SH3BP4    | 693393    |
| SH3-domain GRB2-like endophilin B1                               | SH3GLB1   | 712393    |
| SHC (Src homology 2 domain containing) transforming<br>protein 1 | SHC1      | 718982    |
| Shroom family member 3                                           | SHROOM3   | 699613    |
| Siah E3 ubiquitin protein ligase 1                               | SIAH1     | 716629    |
| Sialic acid binding Ig-like lectin 1, sialoadhesin               | SIGLEC1   | 717470    |
| Sialic acid binding Ig-like lectin 10                            | SIGLEC10  | 719648    |
| Sideroflexin 1                                                   | SFXN1     | 695107    |

|                                                                                                         |          |           |
|---------------------------------------------------------------------------------------------------------|----------|-----------|
| Sideroflexin 2                                                                                          | SFXN2    | 713841    |
| Sideroflexin 4                                                                                          | SFXN4    | 702765    |
| Signal peptidase complex subunit 1                                                                      | SPCS1    | 696426    |
| Signal peptide, CUB domain, EGF-like 2                                                                  | SCUBE2   | 708152    |
| Signal recognition particle 68kda                                                                       | SRP68    | 705568    |
| Signal sequence receptor, alpha                                                                         | SSR1     | 693818    |
| Signal sequence receptor, beta (translocon-associated protein beta)                                     | SSR2     | 719383    |
| Signal sequence receptor, delta                                                                         | SSR4     | 697266    |
| Signal transducing adaptor family member 1                                                              | STAP1    | 711834    |
| Sin3A associated protein 18kda                                                                          | SAP18    | 703078    |
| Sin3A associated protein 25kda                                                                          | SAP25    | 106997576 |
| Sin3A associated protein 30kda                                                                          | SAP30    | 696519    |
| Single-stranded DNA binding protein 1, mitochondrial                                                    | SSBP1    | 694459    |
| SIVA1, apoptosis-inducing factor                                                                        | SIVA1    | 706688    |
| SIX homeobox 4                                                                                          | SIX4     | 703798    |
| Sjogren syndrome nuclear autoantigen 1                                                                  | SSNA1    | 706507    |
| SKI-like proto-oncogene                                                                                 | SKIL     | 696680    |
| SLIT and NTRK like family member 1                                                                      | SLITRK1  | 699217    |
| SMAD family member 2                                                                                    | SMAD2    | 697581    |
| Smad nuclear interacting protein 1                                                                      | SNIP1    | 713733    |
| Small nuclear ribonucleoprotein D2 polypeptide                                                          | SNRPD2   | 715183    |
| Small nuclear ribonucleoprotein polypeptide E                                                           | SNRPE    | 701418    |
| Small nuclear ribonucleoprotein polypeptide G                                                           | SNRPG    | 702586    |
| Small nuclear ribonucleoprotein polypeptides B and B1                                                   | SNRPB    | 716578    |
| Small ubiquitin-like modifier 1                                                                         | SUMO1    | 703644    |
| SMG7 nonsense mediated mrna decay factor                                                                | SMG7     | 717603    |
| SMG8 nonsense mediated mrna decay factor                                                                | SMG8     | 711172    |
| Smoothelin                                                                                              | SMTN     | 716424    |
| SMYD family member 5                                                                                    | SMYD5    | 705926    |
| SNAP-associated protein                                                                                 | SNAPIN   | 715546    |
| SNRPN upstream reading frame                                                                            | SNURF    | 711028    |
| Sodium channel modifier 1                                                                               | SCNM1    | 709922    |
| Sodium channel, non voltage gated 1 beta subunit                                                        | SCNN1B   | 700093    |
| Solute carrier family 1 (neuronal/epithelial high affinity glutamate transporter, system Xag), member 1 | SLC1A1   | 694947    |
| Solute carrier family 13 (sodium/sulfate symporter), member 4                                           | SLC13A4  | 708744    |
| Solute carrier family 16 member 11                                                                      | SLC16A11 | 721775    |
| Solute carrier family 18 (vesicular monoamine transporter), member 2                                    | SLC18A2  | 701133    |
| Solute carrier family 2 (facilitated glucose transporter), member 13                                    | SLC2A13  | 697822    |
| Solute carrier family 2 (facilitated glucose transporter), member 3                                     | SLC2A3   | 715915    |
| Solute carrier family 2 (facilitated glucose transporter), member 4                                     | SLC2A4   | 714701    |
| Solute carrier family 20 (phosphate transporter), member 1                                              | SLC20A1  | 699462    |
| Solute carrier family 22 (organic anion transporter), member 6                                          | SLC22A6  | 718377    |

|                                                                                             |          |        |
|---------------------------------------------------------------------------------------------|----------|--------|
| Solute carrier family 22 member 17                                                          | SLC22A17 | 713765 |
| Solute carrier family 22 member 18                                                          | SLC22A18 | 721230 |
| Solute carrier family 24 (sodium/potassium/calcium exchanger), member 2                     | SLC24A2  | 711896 |
| Solute carrier family 25 (aspartate/glutamate carrier), member 12                           | SLC25A12 | 695173 |
| Solute carrier family 25 (carnitine/acylcarnitine translocase), member 20                   | SLC25A20 | 709029 |
| Solute carrier family 25 (mitochondrial carrier; adenine nucleotide translocator), member 5 | SLC25A5  | 693502 |
| Solute carrier family 25 (mitochondrial carrier; phosphate carrier), member 24              | SLC25A24 | 694803 |
| Solute carrier family 25 (mitochondrial carrier; phosphate carrier), member 25              | SLC25A25 | 698216 |
| Solute carrier family 25 (mitochondrial oxoadipate carrier), member 21                      | SLC25A21 | 697370 |
| Solute carrier family 25 (S-adenosylmethionine carrier), member 26                          | SLC25A26 | 697960 |
| Solute carrier family 25 member 40                                                          | SLC25A40 | 705584 |
| Solute carrier family 25 member 41                                                          | SLC25A41 | 702790 |
| Solute carrier family 25 member 46                                                          | SLC25A46 | 705968 |
| Solute carrier family 26 (anion exchanger), member 8                                        | SLC26A8  | 719049 |
| Solute carrier family 34 (type II sodium/phosphate cotransporter), member 2                 | SLC34A2  | 694217 |
| Solute carrier family 35 (adenosine 3'-phospho 5'-phosphosulfate transporter), member B3    | SLC35B3  | 698416 |
| Solute carrier family 35 (UDP-galactose transporter), member A2                             | SLC35A2  | 711587 |
| Solute carrier family 35 (UDP-glca/UDP-galnac transporter), member D1                       | SLC35D1  | 700175 |
| Solute carrier family 35 member B1                                                          | SLC35B1  | 699953 |
| Solute carrier family 37 (glucose-6-phosphate transporter), member 2                        | SLC37A2  | 712841 |
| Solute carrier family 38 member 1                                                           | SLC38A1  | 702135 |
| Solute carrier family 38 member 6                                                           | SLC38A6  | 704017 |
| Solute carrier family 38 member 7                                                           | SLC38A7  | 707671 |
| Solute carrier family 39 (zinc transporter), member 13                                      | SLC39A13 | 713420 |
| Solute carrier family 39 (zinc transporter), member 3                                       | SLC39A3  | 711564 |
| Solute carrier family 4 (anion exchanger), member 1, adaptor protein                        | SLC4A1AP | 701783 |
| Solute carrier family 4 (anion exchanger), member 2                                         | SLC4A2   | 713966 |
| Solute carrier family 4, sodium borate transporter, member 11                               | SLC4A11  | 718393 |
| Solute carrier family 41 (magnesium transporter), member 1                                  | SLC41A1  | 696944 |
| Solute carrier family 41 member 3                                                           | SLC41A3  | 716921 |
| Solute carrier family 44 member 3                                                           | SLC44A3  | 714768 |
| Solute carrier family 44 member 4                                                           | SLC44A4  | 715779 |
| Solute carrier family 46 member 2                                                           | SLC46A2  | 719542 |
| Solute carrier family 5 (sodium/glucose cotransporter), member 2                            | SLC5A2   | 714228 |
| Solute carrier family 51 beta subunit                                                       | SLC51B   | 708427 |

|                                                                                               |          |        |
|-----------------------------------------------------------------------------------------------|----------|--------|
| Solute carrier family 6 (neurotransmitter transporter), member 13                             | SLC6A13  | 705918 |
| Solute carrier family 6 (neurotransmitter transporter), member 2                              | SLC6A2   | 613238 |
| Solute carrier family 6 (neurotransmitter transporter), member 8                              | SLC6A8   | 698307 |
| Solute carrier family 6 (neutral amino acid transporter), member 18                           | SLC6A18  | 723065 |
| Solute carrier family 7 (amino acid transporter light chain, L system), member 8              | SLC7A8   | 713511 |
| Solute carrier family 9, subfamily A (NHE3, cation proton antiporter 3), member 3 regulator 2 | SLC9A3R2 | 694658 |
| Solute carrier family 9, subfamily A (NHE4, cation proton antiporter 4), member 4             | SLC9A4   | 712136 |
| Solute carrier family 9, subfamily B (NHA1, cation proton antiporter 1), member 1             | SLC9B1   | 710949 |
| Solute carrier organic anion transporter family member 2B1                                    | SLCO2B1  | 694829 |
| SON DNA binding protein                                                                       | SON      | 704712 |
| Sonic hedgehog                                                                                | SHH      | 716553 |
| Sorbin and SH3 domain containing 3                                                            | SORBS3   | 716198 |
| Sorting nexin 1                                                                               | SNX1     | 706544 |
| Sorting nexin 11                                                                              | SNX11    | 696913 |
| Sorting nexin 13                                                                              | SNX13    | 714019 |
| Sorting nexin 14                                                                              | SNX14    | 696632 |
| Sorting nexin 3                                                                               | SNX3     | 700989 |
| Sorting nexin 33                                                                              | SNX33    | 706309 |
| SOS Ras/Rho guanine nucleotide exchange factor 2                                              | SOS2     | 705601 |
| SP110 nuclear body protein                                                                    | SP110    | 714244 |
| Sp2 transcription factor                                                                      | SP2      | 694834 |
| Sp3 transcription factor                                                                      | SP3      | 699901 |
| SPARC like 1                                                                                  | SPARCL1  | 701468 |
| Spastic paraplegia 11 (autosomal recessive)                                                   | SPG11    | 712221 |
| Spastic paraplegia 21 (autosomal recessive, Mast syndrome)                                    | SPG21    | 712815 |
| Spectrin, beta, non-erythrocytic 1                                                            | SPTBN1   | 716794 |
| Spen family transcriptional repressor                                                         | SPEN     | 696205 |
| Sperm acrosome associated 1                                                                   | SPACA1   | 699611 |
| Sperm antigen with calponin homology and coiled-coil domains 1-like                           | SPECC1L  | 707641 |
| Sperm associated antigen 5                                                                    | SPAG5    | 709400 |
| Sperm flagellar 1                                                                             | SPEF1    | 717547 |
| Spermatid perinuclear RNA binding protein                                                     | STRBP    | 695402 |
| Spermatogenesis associated 22                                                                 | SPATA22  | 706060 |
| Spermatogenesis associated 2-like                                                             | SPATA2L  | 699974 |
| Spermatogenesis associated 5-like 1                                                           | SPATA5L1 | 713376 |
| Spermatogenesis associated 7                                                                  | SPATA7   | 693836 |
| Spermatogenesis associated, serine rich 2 like                                                | SPATS2L  | 699458 |
| Spermidine/spermine N1-acetyltransferase 1                                                    | SAT1     | 697884 |
| Spermine synthase                                                                             | SMS      | 698179 |
| Sphingomyelin phosphodiesterase 2                                                             | SMPD2    | 698865 |
| Sphingosine-1-phosphate phosphatase 2                                                         | SGPP2    | 705674 |
| Spla/ryanodine receptor domain and SOCS box containing 1                                      | SPSB1    | 722211 |



|                                                                                                      |          |        |
|------------------------------------------------------------------------------------------------------|----------|--------|
| Splicing factor 3a subunit 2                                                                         | SF3A2    | 721469 |
| Splicing factor 3b subunit 3                                                                         | SF3B3    | 708939 |
| Splicing factor 3b subunit 5                                                                         | SF3B5    | 699863 |
| Splicing factor 3b, subunit 1, 155kda                                                                | SF3B1    | 697773 |
| Splicing factor 3b, subunit 4, 49kda                                                                 | SF3B4    | 705655 |
| Split hand/foot malformation (ectrodactyly) type 1                                                   | SHFM1    | 698349 |
| SPRY domain containing 4                                                                             | SPRYD4   | 713037 |
| SPT4 homolog, DSIF elongation factor subunit                                                         | SUPT4H1  | 710214 |
| SPT5 homolog, DSIF elongation factor subunit                                                         | SUPT5H   | 697337 |
| Squamous cell carcinoma antigen recognized by T-cells 3                                              | SART3    | 705552 |
| Src-related kinase lacking C-terminal regulatory tyrosine and N-terminal myristylation sites         | SRMS     | 719587 |
| SRP receptor alpha subunit                                                                           | SRPRA    | 714215 |
| SR-related CTD-associated factor 11                                                                  | SCAF11   | 701894 |
| SRSF protein kinase 1                                                                                | SRPK1    | 719039 |
| SRY-box 11                                                                                           | SOX11    | 707983 |
| SRY-box 13                                                                                           | SOX13    | 700802 |
| ST3 beta-galactoside alpha-2,3-sialyltransferase 4                                                   | ST3GAL4  | 717792 |
| Stabilizer of axonemal microtubules 1                                                                | SAXO1    | 712700 |
| Staphylococcal nuclease and tudor domain containing 1                                                | SND1     | 699542 |
| Star related lipid transfer domain containing 3                                                      | STARD3   | 697212 |
| Star related lipid transfer domain containing 5                                                      | STARD5   | 713308 |
| STARD3 N-terminal like                                                                               | STARD3NL | 705212 |
| Stathmin 1                                                                                           | STMN1    | 719733 |
| Stathmin 2                                                                                           | STMN2    | 699264 |
| Staufen double-stranded RNA binding protein 1                                                        | STAU1    | 704197 |
| STE20-related kinase adaptor alpha                                                                   | STRADA   | 717927 |
| Sterile alpha motif domain containing 15                                                             | SAMD15   | 706090 |
| Steroid-5-alpha-reductase, alpha polypeptide 1 (3-oxo-5 alpha-steroid delta 4-dehydrogenase alpha 1) | SRD5A1   | 695103 |
| STIP1 homology and U-box containing protein 1, E3 ubiquitin protein ligase                           | STUB1    | 697105 |
| Stomatin like 2                                                                                      | STOML2   | 698458 |
| Storkhead box 2                                                                                      | STOX2    | 693692 |
| Stratifin                                                                                            | SFN      | 715055 |
| Strawberry notch homolog 2 (Drosophila)                                                              | SBNO2    | 721186 |
| Striatin interacting protein 1                                                                       | STRIP1   | 700799 |
| Stromal cell derived factor 4                                                                        | SDF4     | 699804 |
| Stromal cell-derived factor 2                                                                        | SDF2     | 716189 |
| Structural maintenance of chromosomes 4                                                              | SMC4     | 702615 |
| Structure specific recognition protein 1                                                             | SSRP1    | 706614 |
| STT3A, subunit of the oligosaccharyltransferase complex (catalytic)                                  | STT3A    | 717056 |
| SUB1 homolog, transcriptional regulator                                                              | SUB1     | 701045 |
| Succinate dehydrogenase complex assembly factor 2                                                    | SDHAF2   | 693401 |
| Succinate dehydrogenase complex subunit A, flavoprotein (Fp)                                         | SDHA     | 708018 |
| Succinate dehydrogenase complex subunit B, iron sulfur (Ip)                                          | SDHB     | 699810 |
| Succinate dehydrogenase complex, subunit D, integral                                                 | SDHD     | 711326 |

|                                                                                                   |         |           |
|---------------------------------------------------------------------------------------------------|---------|-----------|
| membrane protein                                                                                  |         |           |
| Succinate-coa ligase, GDP-forming, beta subunit                                                   | SUCLG2  | 697454    |
| Sulfatase 2                                                                                       | SULF2   | 715937    |
| Sulfiredoxin 1                                                                                    | SRXN1   | 714997    |
| SUMO1 activating enzyme subunit 1                                                                 | SAE1    | 717918    |
| SUMO1/sentrin specific peptidase 5                                                                | SENP5   | 710223    |
| SUMO1/sentrin specific peptidase 6                                                                | SENP6   | 716554    |
| SUMO1/sentrin specific peptidase 7                                                                | SENP7   | 701453    |
| SUN domain containing ossification factor                                                         | SUCO    | 705776    |
| Superkiller viralicidic activity 2-like 2 (S. Cerevisiae)                                         | SKIV2L2 | 706419    |
| Superoxide dismutase 1, soluble                                                                   | SOD1    | 574096    |
| Superoxide dismutase 3, extracellular                                                             | SOD3    | 715931    |
| Supervillin                                                                                       | SVIL    | 695267    |
| Suppression of tumorigenicity 13 (colon carcinoma) (Hsp70 interacting protein)                    | ST13    | 705664    |
| Suppression of tumorigenicity 7                                                                   | ST7     | 704776    |
| Suppressor of cytokine signaling 6                                                                | SOCS6   | 704108    |
| Suppressor of cytokine signaling 7                                                                | SOCS7   | 693737    |
| Suppressor of fused homolog (Drosophila)                                                          | SUFU    | 713576    |
| Surfactant associated 2                                                                           | SFTA2   | 714397    |
| Surfeit 4                                                                                         | SURF4   | 100429960 |
| SURP and G-patch domain containing 1                                                              | SUGP1   | 719772    |
| Survival motor neuron domain containing 1                                                         | SMNDC1  | 694761    |
| Survival of motor neuron 1, telomeric                                                             | SMN1    | 677703    |
| SWI/SNF related, matrix associated, actin dependent regulator of chromatin, subfamily a, member 2 | SMARCA2 | 696973    |
| SWI/SNF related, matrix associated, actin dependent regulator of chromatin, subfamily a, member 5 | SMARCA5 | 700614    |
| SWI/SNF related, matrix associated, actin dependent regulator of chromatin, subfamily b, member 1 | SMARCB1 | 699190    |
| SWI/SNF related, matrix associated, actin dependent regulator of chromatin, subfamily e, member 1 | SMARCE1 | 701310    |
| SWT1, RNA endoribonuclease homolog                                                                | SWT1    | 714083    |
| Synapse differentiation inducing 1                                                                | SYNDIG1 | 704737    |
| Synaptophysin                                                                                     | SYP     | 715739    |
| Synaptophysin-like 1                                                                              | SYPL1   | 698350    |
| Synaptopodin                                                                                      | SYNPO   | 711221    |
| Synaptosome associated protein 47kda                                                              | SNAP47  | 696700    |
| Synaptotagmin VII                                                                                 | SYT7    | 722368    |
| Syndecan binding protein                                                                          | SDCBP   | 698381    |
| Synemin                                                                                           | SYNM    | 717194    |
| Synovial sarcoma translocation gene on chromosome 18-like 2                                       | SS18L2  | 716387    |
| Syntaxin 1B                                                                                       | STX1B   | 714251    |
| Syntaxin binding protein 3                                                                        | STXBP3  | 699144    |
| Syntaxin binding protein 6 (amisyn)                                                               | STXBP6  | 715357    |
| Synuclein alpha interacting protein                                                               | SNCAIP  | 700372    |
| Synuclein beta                                                                                    | SNCB    | 697484    |
| Tafazzin                                                                                          | TAZ     | 574297    |

|                                                                                             |         |        |
|---------------------------------------------------------------------------------------------|---------|--------|
| TAM41, mitochondrial translocator assembly and maintenance protein, homolog (S. Cerevisiae) | C3orf31 | 695998 |
| TAO kinase 2                                                                                | TAOK2   | 707777 |
| TAR (HIV-1) RNA binding protein 1                                                           | TARBP1  | 712397 |
| TAR (HIV-1) RNA binding protein 2                                                           | TARBP2  | 703294 |
| Taspase 1                                                                                   | TASP1   | 694028 |
| Taste 1 receptor member 1                                                                   | TAS1R1  | 720987 |
| TATA-box binding protein associated factor 10                                               | TAF10   | 710022 |
| TATA-box binding protein associated factor 12                                               | TAF12   | 717135 |
| TATA-box binding protein associated factor 5                                                | TAF5    | 714558 |
| TATA-box binding protein associated factor 5 like                                           | TAF5L   | 693770 |
| TATA-box binding protein associated factor 9                                                | TAF9    | 700239 |
| TATA-box binding protein associated factor, RNA polymerase I, D                             | TAF1D   | 696602 |
| Tatd dnase domain containing 1                                                              | TATDN1  | 706095 |
| Tax1 (human T-cell leukemia virus type I) binding protein 1                                 | TAX1BP1 | 698103 |
| TBC1 domain family member 15                                                                | TBC1D15 | 718743 |
| TBC1 domain family member 17                                                                | TBC1D17 | 719093 |
| TBC1 domain family member 25                                                                | TBC1D25 | 710596 |
| TBC1 domain family member 9                                                                 | TBC1D9  | 702230 |
| TBK1 binding protein 1                                                                      | TBKBP1  | 693913 |
| T-box 21                                                                                    | TBX21   | 694044 |
| T-cell activation rhogtpase activating protein                                              | TAGAP   | 701690 |
| T-cell acute lymphocytic leukemia 2                                                         | TAL2    | 712138 |
| TCF3 (E2A) fusion partner (in childhood Leukemia)                                           | TFPT    | 720296 |
| T-complex 11, testis-specific                                                               | TCP11   | 718695 |
| T-complex 11, testis-specific-like 1                                                        | TCP11L1 | 694899 |
| Teashirt zinc finger homeobox 1                                                             | TSHZ1   | 703018 |
| TEK tyrosine kinase, endothelial                                                            | TEK     | 707455 |
| TELO2 interacting protein 1                                                                 | TTI1    | 699930 |
| Telomeric repeat binding factor 2, interacting protein                                      | TERF2IP | 712149 |
| Tensin 4                                                                                    | TNS4    | 701075 |
| TERF1 (TRF1)-interacting nuclear factor 2                                                   | TINF2   | 715812 |
| Testin LIM domain protein                                                                   | TES     | 706879 |
| Testis expressed 10                                                                         | TEX10   | 714536 |
| Testis expressed 28                                                                         | TEX28   | 699141 |
| Testis expressed 30                                                                         | TEX30   | 701917 |
| Testis-specific serine kinase 2                                                             | TSSK2   | 711241 |
| Testis-specific serine kinase 3                                                             | TSSK3   | 708182 |
| Tetraspanin 3                                                                               | TSPAN3  | 708428 |
| Tetraspanin 8                                                                               | TSPAN8  | 718622 |
| Tetratricopeptide repeat domain 12                                                          | TTC12   | 693909 |
| Tetratricopeptide repeat domain 27                                                          | TTC27   | 707021 |
| Tetratricopeptide repeat domain 7B                                                          | TTC7B   | 696029 |
| Tetratricopeptide repeat domain 9C                                                          | TTC9C   | 718583 |
| TGF-beta activated kinase 1/MAP3K7 binding protein 1                                        | TAB1    | 703409 |
| TGF-beta activated kinase 1/MAP3K7 binding protein 2                                        | TAB2    | 696875 |
| THAP domain containing 7                                                                    | THAP7   | 696208 |

|                                                                            |          |        |
|----------------------------------------------------------------------------|----------|--------|
| THAP domain containing, apoptosis associated protein 3                     | THAP3    | 704946 |
| Thioredoxin domain containing 11                                           | TXNDC11  | 711826 |
| Thioredoxin domain containing 12 (endoplasmic reticulum)                   | TXNDC12  | 712891 |
| Thioredoxin domain containing 9                                            | TXNDC9   | 709303 |
| Thioredoxin like 1                                                         | TXNL1    | 695194 |
| Thioredoxin like 4A                                                        | TXNL4A   | 698969 |
| Thioredoxin-related transmembrane protein 4                                | TMX4     | 718375 |
| Thiosulfate sulfurtransferase (rhodanese)                                  | TST      | 698021 |
| THO complex 1                                                              | THOC1    | 697954 |
| THO complex 6                                                              | THOC6    | 700217 |
| Thrombospondin 3                                                           | THBS3    | 717572 |
| THUMP domain containing 2                                                  | THUMPD2  | 712045 |
| Thy-1 cell surface antigen                                                 | THY1     | 705321 |
| Thymidine phosphorylase                                                    | TYMP     | 716161 |
| Thyroid hormone receptor interactor 11                                     | TRIP11   | 697489 |
| Thyroid hormone receptor interactor 12                                     | TRIP12   | 710560 |
| Thyroid hormone receptor interactor 4                                      | TRIP4    | 707263 |
| TIA1 cytotoxic granule-associated RNA binding protein                      | TIA1     | 702366 |
| Titin-cap                                                                  | TCAP     | 697327 |
| TM2 domain containing 2                                                    | TM2D2    | 701007 |
| TNF alpha induced protein 6                                                | TNFAIP6  | 694699 |
| TNF receptor associated factor 2                                           | TRAF2    | 708391 |
| TNF receptor associated factor 7                                           | TRAF7    | 695415 |
| TNF receptor-associated protein 1                                          | TRAP1    | 706234 |
| Tocopherol (alpha) transfer protein-like                                   | TTPAL    | 712620 |
| Topoisomerase (DNA) II alpha                                               | TOP2A    | 700707 |
| Topoisomerase (DNA) II beta                                                | TOP2B    | 677709 |
| Topoisomerase (DNA) II binding protein 1                                   | TOPBP1   | 719054 |
| Topoisomerase I binding, arginine/serine-rich, E3 ubiquitin protein ligase | TOPORS   | 703930 |
| Torsin family 1, member A (torsin A)                                       | TOR1A    | 722520 |
| Torsin family 2, member A                                                  | TOR2A    | 700203 |
| TP53 induced glycolysis regulatory phosphatase                             | TIGAR    | 721886 |
| TPX2, microtubule-associated                                               | TPX2     | 712961 |
| TRAF family member associated NFKB activator                               | TANK     | 700942 |
| TRAF3 interacting protein 2                                                | TRAF3IP2 | 697530 |
| TRAF3 interacting protein 3                                                | TRAF3IP3 | 712895 |
| Trafficking protein particle complex 11                                    | TRAPPC11 | 702066 |
| Trans-2,3-enoyl-coa reductase                                              | TECR     | 718928 |
| Transaldolase 1                                                            | TALDO1   | 720828 |
| Transcription elongation factor A (SII)-like 3                             | TCEAL3   | 696692 |
| Transcription elongation factor A (SII)-like 7                             | TCEAL7   | 695831 |
| Transcription elongation factor A (SII)-like 8                             | TCEAL8   | 695496 |
| Transcription elongation factor B (SIIL), polypeptide 1 (15kda, elongin C) | TCEB1    | 698922 |
| Transcription factor A, mitochondrial                                      | TFAM     | 701368 |
| Transcription factor B1, mitochondrial                                     | TFB1M    | 701830 |
| Transcription factor binding to IGHM enhancer 3                            | TFE3     | 712161 |

|                                                                           |          |           |
|---------------------------------------------------------------------------|----------|-----------|
| Transducin (beta)-like 1 X-linked receptor 1                              | TBL1XR1  | 712740    |
| Transducin (beta)-like 3                                                  | TBL3     | 693864    |
| Transducin like enhancer of split 1                                       | TLE1     | 707336    |
| Transferrin receptor                                                      | TFRC     | 711568    |
| Transformer 2 alpha homolog (Drosophila)                                  | TRA2A    | 574247    |
| Transformer 2 beta homolog (Drosophila)                                   | TRA2B    | 574337    |
| Transforming growth factor beta induced                                   | TGFBI    | 712503    |
| Transforming growth factor beta receptor associated protein 1             | TGFBRAP1 | 713102    |
| Transforming, acidic coiled-coil containing protein 2                     | TACC2    | 705497    |
| Transforming, acidic coiled-coil containing protein 3                     | TACC3    | 712898    |
| Transient receptor potential cation channel, subfamily M, member 5        | TRPM5    | 705070    |
| Transient receptor potential cation channel, subfamily V, member 4        | TRPV4    | 709605    |
| Translational activator of mitochondrially encoded cytochrome c oxidase I | TACO1    | 717828    |
| Translocase of inner mitochondrial membrane 10 homolog B (yeast)          | TIMM10B  | 711085    |
| Translocase of inner mitochondrial membrane 17 homolog A (yeast)          | TIMM17A  | 707001    |
| Translocase of inner mitochondrial membrane 17 homolog B (yeast)          | TIMM17B  | 714895    |
| Translocase of inner mitochondrial membrane 44 homolog (yeast)            | TIMM44   | 709800    |
| Translocase of inner mitochondrial membrane 8 homolog B (yeast)           | TIMM8B   | 711249    |
| Translocase of inner mitochondrial membrane domain containing 1           | TIMMDC1  | 712414    |
| Translocase of outer mitochondrial membrane 6 homolog (yeast)             | TOMM6    | 100423264 |
| Translocase of outer mitochondrial membrane 70 homolog A (S. Cerevisiae)  | TOMM70A  | 700347    |
| Translocated promoter region, nuclear basket protein                      | TPR      | 713910    |
| Transmembrane 4 L six family member 5                                     | TM4SF5   | 709844    |
| Transmembrane 6 superfamily member 2                                      | TM6SF2   | 719756    |
| Transmembrane 9 superfamily member 1                                      | TM9SF1   | 715472    |
| Transmembrane and immunoglobulin domain containing 3                      | TMIGD3   | 104564312 |
| Transmembrane and ubiquitin-like domain containing 2                      | TMUB2    | 714541    |
| Transmembrane channel like 8                                              | TMC8     | 100423640 |
| Transmembrane p24 trafficking protein 1                                   | TMED1    | 713618    |
| Transmembrane p24 trafficking protein 3                                   | TMED3    | 711993    |
| Transmembrane p24 trafficking protein 4                                   | TMED4    | 699105    |
| Transmembrane p24 trafficking protein 7                                   | TMED7    | 100533192 |
| Transmembrane phosphoinositide 3-phosphatase and tensin homolog 2         | TPTE2    | 704870    |
| Transmembrane protease, serine 13                                         | TMPRSS13 | 698586    |
| Transmembrane protein 104                                                 | TMEM104  | 698592    |
| Transmembrane protein 115                                                 | TMEM115  | 702164    |
| Transmembrane protein 125                                                 | TMEM125  | 699920    |
| Transmembrane protein 126A                                                | TMEM126A | 702831    |

|                                                             |          |           |
|-------------------------------------------------------------|----------|-----------|
| Transmembrane protein 126B                                  | TMEM126B | 702719    |
| Transmembrane protein 132A                                  | TMEM132A | 695291    |
| Transmembrane protein 135                                   | TMEM135  | 704963    |
| Transmembrane protein 136                                   | TMEM136  | 706163    |
| Transmembrane protein 138                                   | TMEM138  | 693905    |
| Transmembrane protein 141                                   | TMEM141  | 721687    |
| Transmembrane protein 145                                   | TMEM145  | 709268    |
| Transmembrane protein 14A                                   | TMEM14A  | 708829    |
| Transmembrane protein 14C                                   | TMEM14C  | 697976    |
| Transmembrane protein 165                                   | TMEM165  | 696262    |
| Transmembrane protein 168                                   | TMEM168  | 702972    |
| Transmembrane protein 175                                   | TMEM175  | 696545    |
| Transmembrane protein 204                                   | TMEM204  | 701926    |
| Transmembrane protein 208                                   | TMEM208  | 697228    |
| Transmembrane protein 216                                   | TMEM216  | 693655    |
| Transmembrane protein 218                                   | TMEM218  | 100430360 |
| Transmembrane protein 243                                   | TMEM243  | 706405    |
| Transmembrane protein 245                                   | TMEM245  | 710299    |
| Transmembrane protein 254                                   | TMEM254  | 701130    |
| Transmembrane protein 261                                   | TMEM261  | 716818    |
| Transmembrane protein 30A                                   | TMEM30A  | 717907    |
| Transmembrane protein 33                                    | TMEM33   | 702063    |
| Transmembrane protein 37                                    | TMEM37   | 695060    |
| Transmembrane protein 39B                                   | TMEM39B  | 706700    |
| Transmembrane protein 42                                    | TMEM42   | 714654    |
| Transmembrane protein 45B                                   | TMEM45B  | 718735    |
| Transmembrane protein 5                                     | TMEM5    | 717102    |
| Transmembrane protein 59                                    | TMEM59   | 714942    |
| Transmembrane protein 94                                    | TMEM94   | 702374    |
| Transmembrane protein, adipocyte associated 1               | TPRA1    | 707221    |
| Transporter 1, ATP-binding cassette, sub-family B (MDR/TAP) | TAP1     | 717726    |
| Transportin 1                                               | TNPO1    | 707195    |
| Tribbles pseudokinase 1                                     | TRIB1    | 693459    |
| Tribbles pseudokinase 2                                     | TRIB2    | 710966    |
| Trinucleotide repeat containing 6C                          | TNRC6C   | 714829    |
| Triokinase/FMN cyclase                                      | TKFC     | 694117    |
| Tripartite motif containing 11                              | TRIM11   | 694150    |
| Tripartite motif containing 14                              | TRIM14   | 715418    |
| Tripartite motif containing 24                              | TRIM24   | 710229    |
| Tripartite motif containing 27                              | TRIM27   | 706129    |
| Tripartite motif containing 3                               | TRIM3    | 710846    |
| Tripartite motif containing 37                              | TRIM37   | 710934    |
| Tripartite motif containing 41                              | TRIM41   | 708426    |
| Tripartite motif containing 62                              | TRIM62   | 709927    |
| Tripartite motif containing 72, E3 ubiquitin protein ligase | TRIM72   | 713623    |
| Tripartite motif containing 8                               | TRIM8    | 713701    |
| TRK-fused gene                                              | TFG      | 700972    |
| Trna 5-methylaminomethyl-2-thiouridylate methyltransferase  | TRMU     | 714268    |

|                                                                              |         |           |
|------------------------------------------------------------------------------|---------|-----------|
| Trna isopentenyltransferase 1                                                | TRIT1   | 716422    |
| Trna methyltransferase 11 homolog                                            | TRMT11  | 712712    |
| Trna methyltransferase 11-2 homolog (S. Cerevisiae)                          | TRMT112 | 717676    |
| Trna methyltransferase 6                                                     | TRMT6   | 718229    |
| Trna methyltransferase O                                                     | TRMO    | 715609    |
| Trna phosphotransferase 1                                                    | TRPT1   | 717911    |
| Trna splicing endonuclease subunit 15                                        | TSEN15  | 717481    |
| Tropomodulin 4                                                               | TMOD4   | 709732    |
| Tropomyosin 2 (beta)                                                         | TPM2    | 696604    |
| Troponin T type 2 (cardiac)                                                  | TNNT2   | 709882    |
| Tryptase gamma 1                                                             | TPSG1   | 100425752 |
| TSC22 domain family member 1                                                 | TSC22D1 | 701076    |
| TSPY-like 4                                                                  | TSPYL4  | 716137    |
| TSSK6 activating co-chaperone                                                | TSACC   | 719490    |
| Tubulin alpha 1a                                                             | TUBA1A  | 574194    |
| Tubulin alpha 4a                                                             | TUBA4A  | 702583    |
| Tubulin alpha like 3                                                         | TUBAL3  | 722506    |
| Tubulin folding cofactor C                                                   | TBCC    | 696997    |
| Tubulin folding cofactor E                                                   | TBCE    | 711476    |
| Tubulin, alpha 1b                                                            | TUBA1B  | 709643    |
| Tudor domain containing 3                                                    | TDRD3   | 696228    |
| Tudor domain containing 7                                                    | TDRD7   | 641450    |
| Tumor necrosis factor (ligand) superfamily, member 12                        | TNFSF12 | 100551504 |
| Tumor protein D52-like 1                                                     | TPD52L1 | 716568    |
| Tumor protein p53 binding protein 1                                          | TP53BP1 | 710237    |
| Tumor protein, translationally-controlled 1                                  | TPT1    | 702155    |
| Tumor suppressing subtransferable candidate 4                                | TSSC4   | 705185    |
| Tumor suppressor candidate 3                                                 | TUSC3   | 701123    |
| Twist family bhlh transcription factor 1                                     | TWIST1  | 574278    |
| Twist family bhlh transcription factor 2                                     | TWIST2  | 697078    |
| TWIST neighbor                                                               | TWISTNB | 707781    |
| Twisted gastrulation homolog 1 (Drosophila)                                  | TWSG1   | 705804    |
| Two pore segment channel 1                                                   | TPCN1   | 712964    |
| Tyrosine 3-monooxygenase/tryptophan 5-monooxygenase activation protein, beta | YWHAB   | 717788    |
| Tyrosine 3-monooxygenase/tryptophan 5-monooxygenase activation protein, eta  | YWHAH   | 717016    |
| Tyrosine hydroxylase                                                         | TH      | 721137    |
| Tyrosine kinase, non-receptor, 1                                             | TNK1    | 715180    |
| Tyrosyl-DNA phosphodiesterase 2                                              | TDP2    | 715162    |
| Ubiquilin 1                                                                  | UBQLN1  | 713525    |
| Ubiquinol-cytochrome c reductase core protein II                             | UQCRC2  | 697967    |
| Ubiquinol-cytochrome c reductase, 6.4kda subunit                             | UQCR    | 708396    |
| Ubiquinol-cytochrome c reductase, complex III subunit VII, 9.5kda            | UQCRQ   | 708950    |
| Ubiquitin A-52 residue ribosomal protein fusion product 1                    | UBA52   | 720243    |
| Ubiquitin B                                                                  | UBB     | 696110    |
| Ubiquitin conjugating enzyme E2 variant 1                                    | UBE2V1  | 100425552 |

|                                                                   |         |           |
|-------------------------------------------------------------------|---------|-----------|
| Ubiquitin conjugating enzyme E2A                                  | UBE2A   | 693716    |
| Ubiquitin conjugating enzyme E2D 4 (putative)                     | UBE2D4  | 707831    |
| Ubiquitin conjugating enzyme E2E 3                                | UBE2E3  | 704530    |
| Ubiquitin conjugating enzyme E2F (putative)                       | UBE2F   | 695394    |
| Ubiquitin conjugating enzyme E2I                                  | UBE2I   | 722434    |
| Ubiquitin conjugating enzyme E2O                                  | UBE2O   | 710529    |
| Ubiquitin C-terminal hydrolase L3                                 | UCHL3   | 697276    |
| Ubiquitin like 5                                                  | UBL5    | 711015    |
| Ubiquitin like 7                                                  | UBL7    | 702305    |
| Ubiquitin like domain containing CTD phosphatase 1                | UBLCP1  | 694476    |
| Ubiquitin protein ligase E3 component n-recogin 7 (putative)      | UBR7    | 698882    |
| Ubiquitin protein ligase E3B                                      | UBE3B   | 707324    |
| Ubiquitin related modifier 1                                      | URM1    | 722618    |
| Ubiquitin specific peptidase 10                                   | USP10   | 718471    |
| Ubiquitin specific peptidase 13 (isopeptidase T-3)                | USP13   | 708624    |
| Ubiquitin specific peptidase 16                                   | USP16   | 706403    |
| Ubiquitin specific peptidase 2                                    | USP2    | 705191    |
| Ubiquitin specific peptidase 21                                   | USP21   | 719894    |
| Ubiquitin specific peptidase 25                                   | USP25   | 716923    |
| Ubiquitin specific peptidase 3                                    | USP3    | 705973    |
| Ubiquitin specific peptidase 38                                   | USP38   | 700235    |
| Ubiquitin specific peptidase 39                                   | USP39   | 696217    |
| Ubiquitin specific peptidase 51                                   | USP51   | 705861    |
| Ubiquitin specific peptidase 8                                    | USP8    | 715523    |
| Ubiquitination factor E4B                                         | UBE4B   | 713348    |
| Ubiquitin-like modifier activating enzyme 2                       | UBA2    | 705808    |
| Ubiquitin-like modifier activating enzyme 3                       | UBA3    | 696493    |
| Ubiquitin-like with PHD and ring finger domains 1                 | UHRF1   | 695531    |
| U-box domain containing 5                                         | UBOX5   | 717166    |
| UBX domain protein 11                                             | UBXN11  | 719826    |
| UDP-Gal:betaglcnac beta 1,4- galactosyltransferase, polypeptide 3 | B4GALT3 | 719920    |
| UDP-glcna:betagal beta-1,3-N-acetylglucosaminyltransferase 2      | B3GNT2  | 693396    |
| UDP-glucose pyrophosphorylase 2                                   | UGP2    | 695178    |
| UDP-N-acetylglucosamine pyrophosphorylase 1                       | UAP1    | 720116    |
| Unc-79 homolog (C. Elegans)                                       | UNC79   | 699262    |
| Unconventional SNARE in the ER 1 homolog (S. Cerevisiae)          | USE1    | 718905    |
| UPF3 regulator of nonsense transcripts homolog B (yeast)          | UPF3B   | 694247    |
| Up-regulated during skeletal muscle growth 5 homolog (mouse)      | USMG5   | 100428448 |
| Upstream binding protein 1 (LBP-1a)                               | UBP1    | 706283    |
| Uromodulin                                                        | UMOD    | 695883    |
| Uronyl-2-sulfotransferase                                         | UST     | 697355    |
| Urotensin 2 receptor                                              | UTS2R   | 574245    |
| USP6 N-terminal like                                              | USP6NL  | 694275    |
| UTP14, U3 small nucleolar ribonucleoprotein, homolog C (yeast)    | UTP14C  | 709657    |
| UTP6 small subunit processome component                           | UTP6    | 713361    |
| UV radiation resistance associated                                | UVRAG   | 696601    |
| Vac14 homolog (S. Cerevisiae)                                     | VAC14   | 708741    |
| Vaccinia related kinase 1                                         | VRK1    | 704798    |



|                                                                                   |         |           |
|-----------------------------------------------------------------------------------|---------|-----------|
| Vacuolar protein sorting 13 homolog C ( <i>S. Cerevisiae</i> )                    | VPS13C  | 709080    |
| Vacuolar protein sorting 4 homolog A ( <i>S. Cerevisiae</i> )                     | VPS4A   | 705277    |
| Vacuolar protein sorting 45 homolog ( <i>S. Cerevisiae</i> )                      | VPS45   | 706035    |
| Vacuolar protein sorting 72 homolog ( <i>S. Cerevisiae</i> )                      | VPS72   | 709818    |
| V-akt murine thymoma viral oncogene homolog 3                                     | AKT3    | 714717    |
| Valosin containing protein lysine (K) methyltransferase                           | VCPKMT  | 705487    |
| Valyl-trna synthetase                                                             | VARS    | 715537    |
| Vascular cell adhesion molecule 1                                                 | VCAM1   | 712036    |
| Vasohibin 1                                                                       | VASH1   | 703906    |
| Vav guanine nucleotide exchange factor 1                                          | VAV1    | 100424248 |
| Vav guanine nucleotide exchange factor 3                                          | VAV3    | 694685    |
| Very low density lipoprotein receptor                                             | VLDLR   | 574284    |
| Vesicle associated membrane protein 7                                             | VAMP7   | 704160    |
| V-ets avian erythroblastosis virus E26 oncogene homolog 1                         | ETS1    | 714697    |
| VGf nerve growth factor inducible                                                 | VGf     | 719578    |
| Vitronectin                                                                       | VTN     | 708499    |
| V-myc avian myelocytomatosis viral oncogene neuroblastoma derived homolog         | MYCN    | 698699    |
| Voltage-dependent anion channel 1                                                 | VDAC1   | 710045    |
| Voltage-dependent anion channel 2                                                 | VDAC2   | 704257    |
| Von Willebrand factor A domain containing 1                                       | VWA1    | 701765    |
| VPS11, CORVET/HOPS core subunit                                                   | VPS11   | 702834    |
| VPS26 retromer complex component B                                                | VPS26B  | 694566    |
| VPS29 retromer complex component                                                  | VPS29   | 709646    |
| VPS33B interacting protein, apical-basolateral polarity regulator, spe-39 homolog | VIPAS39 | 706315    |
| VPS8, CORVET complex subunit                                                      | VPS8    | 701567    |
| V-ral simian leukemia viral oncogene homolog A (ras related)                      | RALA    | 703440    |
| V-ral simian leukemia viral oncogene homolog B                                    | RALB    | 695852    |
| WAP four-disulfide core domain 10A                                                | WFDC10A | 717384    |
| WAS protein family member 3                                                       | WASF3   | 709849    |
| WD repeat containing, antisense to TP53                                           | WRAP53  | 716125    |
| WD repeat domain 11                                                               | WDR11   | 714990    |
| WD repeat domain 12                                                               | WDR12   | 705623    |
| WD repeat domain 19                                                               | WDR19   | 698866    |
| WD repeat domain 20                                                               | WDR20   | 708533    |
| WD repeat domain 26                                                               | WDR26   | 704911    |
| WD repeat domain 3                                                                | WDR3    | 711960    |
| WD repeat domain 35                                                               | WDR35   | 716638    |
| WD repeat domain 4                                                                | WDR4    | 714230    |
| WD repeat domain 47                                                               | WDR47   | 696942    |
| WD repeat domain 53                                                               | WDR53   | 709710    |
| WD repeat domain 6                                                                | WDR6    | 708505    |
| WD repeat domain 61                                                               | WDR61   | 709971    |
| WD repeat domain 70                                                               | WDR70   | 706130    |
| WD repeat domain 74                                                               | WDR74   | 718460    |
| WD repeat domain 75                                                               | WDR75   | 709104    |
| WD repeat domain 77                                                               | WDR77   | 677686    |

|                                                                        |          |           |
|------------------------------------------------------------------------|----------|-----------|
| WD repeat, sterile alpha motif and U-box domain containing 1           | WDSUB1   | 699456    |
| WDYHV motif containing 1                                               | WDYHV1   | 704686    |
| WEE1 G2 checkpoint kinase                                              | WEE1     | 703760    |
| Werner helicase interacting protein 1                                  | WRNIP1   | 707250    |
| Williams Beuren syndrome chromosome region 22                          | WBSCR22  | 720121    |
| Wilms tumor 1 associated protein                                       | WTAP     | 702295    |
| Wingless-type MMTV integration site family member 10B                  | WNT10B   | 708906    |
| Wingless-type MMTV integration site family member 11                   | WNT11    | 696845    |
| Wiskott-Aldrich syndrome-like                                          | WASL     | 696556    |
| WSC domain containing 1                                                | WSCD1    | 712488    |
| WW domain binding protein 1                                            | WBP1     | 709202    |
| WW domain binding protein 11                                           | WBP11    | 699451    |
| WW domain binding protein 2                                            | WBP2     | 704545    |
| WW domain binding protein 5                                            | WBP5     | 696661    |
| WW domain containing adaptor with coiled-coil                          | WAC      | 715828    |
| WW domain containing E3 ubiquitin protein ligase 2                     | WWP2     | 705464    |
| X-box binding protein 1                                                | XBP1     | 713863    |
| Xeroderma pigmentosum, complementation group A                         | XPA      | 715705    |
| X-linked Kx blood group                                                | XK       | 696407    |
| X-linked Kx blood group related, X-linked                              | XKRX     | 701721    |
| XPA binding protein 2                                                  | XAB2     | 704109    |
| X-ray repair complementing defective repair in Chinese hamster cells 6 | XRCC6    | 707975    |
| XRCC6 binding protein 1                                                | XRCC6BP1 | 712932    |
| Yae1 domain containing 1                                               | YAE1D1   | 703786    |
| Ybey metallopeptidase (putative)                                       | YBEY     | 721807    |
| YEATS domain containing 4                                              | YEATS4   | 718376    |
| Yip1 domain family member 4                                            | YIPF4    | 706819    |
| Yip1 interacting factor homolog A (S. Cerevisiae)                      | YIF1A    | 714486    |
| Yippee like 3                                                          | YPEL3    | 708740    |
| Zinc and ring finger 2, E3 ubiquitin protein ligase                    | ZNRF2    | 698413    |
| Zinc finger (CCCH type), RNA binding motif and serine/arginine rich 2  | ZRSR2    | 720986    |
| Zinc finger and BTB domain containing 26                               | ZBTB26   | 698776    |
| Zinc finger and BTB domain containing 33                               | ZBTB33   | 695801    |
| Zinc finger and BTB domain containing 37                               | ZBTB37   | 708769    |
| Zinc finger and BTB domain containing 39                               | ZBTB39   | 713914    |
| Zinc finger and BTB domain containing 49                               | ZBTB49   | 712422    |
| Zinc finger and BTB domain containing 5                                | ZBTB5    | 718482    |
| Zinc finger and SCAN domain containing 2                               | ZSCAN2   | 695673    |
| Zinc finger and SCAN domain containing 29                              | ZSCAN29  | 710414    |
| Zinc finger and SCAN domain containing 32                              | ZSCAN32  | 702733    |
| Zinc finger CCCH-type containing 12A                                   | ZC3H12A  | 713604    |
| Zinc finger CCCH-type containing 3                                     | ZC3H3    | 708584    |
| Zinc finger CCCH-type containing 7A                                    | ZC3H7A   | 711984    |
| Zinc finger protein 140                                                | ZNF140   | 695171    |
| Zinc finger protein 180                                                | ZNF180   | 712493    |
| Zinc finger protein 181                                                | ZNF181   | 106992424 |

|                                                 |         |           |
|-------------------------------------------------|---------|-----------|
| Zinc finger protein 207                         | ZNF207  | 100689488 |
| Zinc finger protein 211                         | ZNF211  | 100429296 |
| Zinc finger protein 22                          | ZNF22   | 706208    |
| Zinc finger protein 221                         | ZNF221  | 100423744 |
| Zinc finger protein 239                         | ZNF239  | 717737    |
| Zinc finger protein 25                          | ZNF25   | 701129    |
| Zinc finger protein 263                         | ZNF263  | 702166    |
| Zinc finger protein 280D                        | ZNF280D | 699509    |
| Zinc finger protein 281                         | ZNF281  | 709466    |
| Zinc finger protein 287                         | ZNF287  | 695524    |
| Zinc finger protein 322                         | ZNF322  | 701098    |
| Zinc finger protein 362                         | ZNF362  | 710013    |
| Zinc finger protein 385A                        | ZNF385A | 705436    |
| Zinc finger protein 397                         | ZNF397  | 714878    |
| Zinc finger protein 410                         | ZNF410  | 698124    |
| Zinc finger protein 436                         | ZNF436  | 709638    |
| Zinc finger protein 460                         | ZNF460  | 710080    |
| Zinc finger protein 462                         | ZNF462  | 711489    |
| Zinc finger protein 484                         | ZNF484  | 711976    |
| Zinc finger protein 496                         | ZNF496  | 709694    |
| Zinc finger protein 503                         | ZNF503  | 703912    |
| Zinc finger protein 521                         | ZNF521  | 709169    |
| Zinc finger protein 584                         | ZNF584  | 711420    |
| Zinc finger protein 593                         | ZNF593  | 714086    |
| Zinc finger protein 595                         | ZNF595  | 716693    |
| Zinc finger protein 608                         | ZNF608  | 702182    |
| Zinc finger protein 620                         | ZNF620  | 100423712 |
| Zinc finger protein 622                         | ZNF622  | 100429384 |
| Zinc finger protein 627                         | ZNF627  | 716820    |
| Zinc finger protein 638                         | ZNF638  | 704418    |
| Zinc finger protein 646                         | ZNF646  | 712774    |
| Zinc finger protein 653                         | ZNF653  | 714754    |
| Zinc finger protein 664                         | ZNF664  | 710703    |
| Zinc finger protein 684                         | ZNF684  | 695691    |
| Zinc finger protein 687                         | ZNF687  | 716590    |
| Zinc finger protein 7                           | ZNF7    | 715735    |
| Zinc finger protein 774                         | ZNF774  | 702985    |
| Zinc finger protein 777                         | ZNF777  | 711987    |
| Zinc finger protein 804B                        | ZNF804B | 704561    |
| Zinc finger protein 92                          | ZNF92   | 708683    |
| Zinc finger RNA binding protein                 | ZFR     | 696882    |
| Zinc finger with UFM1-specific peptidase domain | ZUFSP   | 718059    |
| Zinc finger, AN1-type domain 2A                 | ZFAND2A | 100426344 |
| Zinc finger, AN1-type domain 3                  | ZFAND3  | 719346    |
| Zinc finger, AN1-type domain 4                  | ZFAND4  | 708136    |
| Zinc finger, C3H1-type containing               | ZFC3H1  | 718671    |
| Zinc finger, CCHC domain containing 11          | ZCCHC11 | 713406    |
| Zinc finger, CCHC domain containing 14          | ZCCHC14 | 703833    |

|                                                |          |        |
|------------------------------------------------|----------|--------|
| Zinc finger, CCHC domain containing 17         | ZCCHC17  | 705172 |
| Zinc finger, CCHC domain containing 6          | ZCCHC6   | 693660 |
| Zinc finger, CCHC domain containing 7          | ZCCHC7   | 716658 |
| Zinc finger, CCHC domain containing 8          | ZCCHC8   | 702359 |
| Zinc finger, DHHC-type containing 12           | ZDHHC12  | 722606 |
| Zinc finger, DHHC-type containing 16           | ZDHHC16  | 705982 |
| Zinc finger, matrin-type 2                     | ZMAT2    | 697247 |
| Zinc finger, matrin-type 5                     | ZMAT5    | 715058 |
| Zinc finger, MYM-type 2                        | ZMYM2    | 721255 |
| Zinc finger, MYM-type 3                        | ZMYM3    | 697147 |
| Zinc finger, MYND-type containing 11           | ZMYND11  | 708761 |
| Zinc finger, RAN-binding domain containing 2   | ZRANB2   | 703513 |
| Zinc metalloproteinase STE24                   | ZMPSTE24 | 693765 |
| Zona pellucida glycoprotein 3 (sperm receptor) | ZP3      | 719925 |
| Zyxin                                          | ZYX      | 706407 |

---

**(4) Expressed in both groups 2a and 2c, not in group 2b**

---

|                                                                |        |        |
|----------------------------------------------------------------|--------|--------|
| 1-acylglycerol-3-phosphate O-acyltransferase 1                 | AGPAT1 | 717174 |
| 1-acylglycerol-3-phosphate O-acyltransferase 5                 | AGPAT5 | 716847 |
| 2,4-dienoyl-coa reductase 1, mitochondrial                     | DECR1  | 696035 |
| 2-phosphoxylose phosphatase 1                                  | PXYLP1 | 715229 |
| 3-hydroxyacyl-coa dehydratase 1                                | HACD1  | 700635 |
| 3-oxoacyl-ACP synthase, mitochondrial                          | OXSM   | 703382 |
| 5'-3' exoribonuclease 2                                        | XRN2   | 700934 |
| 5-hydroxytryptamine (serotonin) receptor 5A, G protein-coupled | HTR5A  | 716134 |
| 5'-nucleotidase, cytosolic IIIA                                | NT5C3A | 708743 |
| 5-phosphohydroxy-L-lysine phospho-lyase                        | PHYKPL | 702302 |
| 8-oxoguanine DNA glycosylase                                   | OGG1   | 700481 |
| Abhydrolase domain containing 12                               | ABHD12 | 705915 |
| Abhydrolase domain containing 6                                | ABHD6  | 702384 |
| Abhydrolase domain containing 8                                | ABHD8  | 718980 |
| ABI family member 3                                            | ABI3   | 698710 |
| Acetyl-coa acetyltransferase 1                                 | ACAT1  | 707653 |
| Acetyl-coa acyltransferase 2                                   | ACAA2  | 709350 |
| Acetyl-coa carboxylase alpha                                   | ACACA  | 714218 |
| Acid phosphatase 6, lysophosphatidic                           | ACP6   | 710431 |
| Acidic nuclear phosphoprotein 32 family member B               | ANP32B | 715508 |
| Acidic residue methyltransferase 1                             | ARMT1  | 704570 |
| Aconitase 1                                                    | ACO1   | 705075 |
| Aconitase 2                                                    | ACO2   | 707441 |
| Actin like 6A                                                  | ACTL6A | 708935 |
| Actin like 7B                                                  | ACTL7B | 710750 |
| Actin related protein 2/3 complex subunit 1A                   | ARPC1A | 718635 |
| Actin related protein 2/3 complex subunit 2                    | ARPC2  | 700536 |
| Actin related protein 2/3 complex subunit 3                    | ARPC3  | 709199 |
| Activating transcription factor 2                              | ATF2   | 699072 |

|                                                                      |          |           |
|----------------------------------------------------------------------|----------|-----------|
| Activating transcription factor 4                                    | ATF4     | 703965    |
| Activin A receptor type I                                            | ACVR1    | 697935    |
| Acyl-coa binding domain containing 3                                 | ACBD3    | 699311    |
| Acyl-coa binding domain containing 6                                 | ACBD6    | 716418    |
| Acyl-coa dehydrogenase, C-4 to C-12 straight chain                   | ACADM    | 705168    |
| Acyl-coa oxidase 1, palmitoyl                                        | ACOX1    | 705197    |
| Acyl-coa thioesterase 13                                             | ACOT13   | 100335133 |
| ADAM metallopeptidase domain 21                                      | ADAM21   | 715640    |
| ADAM metallopeptidase with thrombospondin type 1 motif 14            | ADAMTS14 | 710154    |
| ADAM metallopeptidase with thrombospondin type 1 motif 6             | ADAMTS6  | 696021    |
| ADAMTS like 5                                                        | ADAMTSL5 | 721290    |
| Adaptor related protein complex 1 associated regulatory protein      | AP1AR    | 700734    |
| Adaptor related protein complex 3, sigma 1 subunit                   | AP3S1    | 696644    |
| Adaptor related protein complex 4, beta 1 subunit                    | AP4B1    | 707634    |
| Adaptor related protein complex 5, mu 1 subunit                      | AP5M1    | 701050    |
| Adducin 1                                                            | ADD1     | 700805    |
| Adducin 3                                                            | ADD3     | 677712    |
| Adenosine deaminase, RNA-specific                                    | ADAR     | 718759    |
| Adenosine monophosphate deaminase 2                                  | AMPD2    | 699561    |
| Adenylate cyclase 4                                                  | ADCY4    | 714684    |
| Adenylate kinase 3                                                   | AK3      | 694714    |
| Adenylosuccinate synthase                                            | ADSS     | 713580    |
| Adhesion G protein-coupled receptor A3                               | ADGRA3   | 715618    |
| Adhesion G protein-coupled receptor L2                               | ADGRL2   | 708998    |
| Adhesion molecule with Ig-like domain 1                              | AMIGO1   | 698932    |
| Adipocyte plasma membrane associated protein                         | APMAP    | 704948    |
| Adipogenesis associated, Mth938 domain containing                    | AAMDC    | 699328    |
| Adipogenesis regulatory factor                                       | ADIRF    | 699173    |
| Adiponectin receptor 2                                               | ADIPOR2  | 707547    |
| ADP ribosylation factor 4                                            | ARF4     | 703432    |
| ADP ribosylation factor gtpase activating protein 3                  | ARFGAP3  | 711160    |
| ADP ribosylation factor guanine nucleotide exchange factor 1         | ARFGEF1  | 704359    |
| ADP ribosylation factor like gtpase 10                               | ARL10    | 696524    |
| ADP ribosylation factor like gtpase 6                                | ARL6     | 696616    |
| ADP ribosylation factor like gtpase 6 interacting protein 5          | ARL6IP5  | 696360    |
| ADP ribosylation factor like gtpase 8B                               | ARL8B    | 703201    |
| ADP-ribosylhydrolase like 2                                          | ADPRHL2  | 712758    |
| Aftiphilin                                                           | AFTPH    | 696100    |
| AHA1, activator of heat shock 90kda protein ATPase homolog 1 (yeast) | AHSA1    | 706547    |
| Ajuba LIM protein                                                    | AJUBA    | 712865    |
| A-kinase anchoring protein 1                                         | AKAP1    | 708500    |
| A-kinase anchoring protein 12                                        | AKAP12   | 641446    |
| A-kinase anchoring protein 2                                         | AKAP2    | 709841    |
| A-kinase anchoring protein 9                                         | AKAP9    | 702970    |
| AKT interacting protein                                              | AKTIP    | 697107    |
| Aladin WD repeat nucleoporin                                         | AAAS     | 719095    |
| Alanine--glyoxylate aminotransferase 2                               | AGXT2    | 699250    |

|                                                                         |          |           |
|-------------------------------------------------------------------------|----------|-----------|
| Aldehyde dehydrogenase 1 family member A1                               | ALDH1A1  | 702598    |
| Aldehyde dehydrogenase 18 family member A1                              | ALDH18A1 | 703357    |
| Aldo-keto reductase family 1, member B1 (aldose reductase)              | AKR1B1   | 705957    |
| ALG14, UDP-N-acetylglucosaminyltransferase subunit                      | ALG14    | 709630    |
| ALG2, alpha-1,3/1,6-mannosyltransferase                                 | ALG2     | 714850    |
| ALG5, dolichyl-phosphate beta-glucosyltransferase                       | ALG5     | 694836    |
| Alkb homolog 2, alpha-ketoglutarate-dependent dioxygenase               | ALKBH2   | 706708    |
| Alkb homolog 3, alpha-ketoglutarate-dependent dioxygenase               | ALKBH3   | 715921    |
| Alkb homolog 4, lysine demethylase                                      | ALKBH4   | 715078    |
| Alkb homolog 5, RNA demethylase                                         | ALKBH5   | 700205    |
| All-trans retinoic acid induced differentiation factor                  | ATRAID   | 699201    |
| Alpha thalassemia/mental retardation syndrome X-linked                  | ATRX     | 705735    |
| Alpha-2-macroglobulin                                                   | A2M      | 716834    |
| Alpha-defensin 1A                                                       | MNP1A    | 574196    |
| Aminoacylase 3                                                          | ACY3     | 711083    |
| Aminoadipate-semialdehyde dehydrogenase-phosphopantetheinyl transferase | AASDHPPT | 100328983 |
| Aminoadipate-semialdehyde synthase                                      | AASS     | 694594    |
| Amino-terminal enhancer of split                                        | AES      | 712353    |
| Amino-terminal enhancer of split                                        | AES      | 712353    |
| Amphiphysin                                                             | AMPH     | 704559    |
| Amylase, alpha 2B (pancreatic)                                          | AMY2B    | 712893    |
| Amyloid beta (A4) precursor protein-binding, family B, member 3         | APBB3    | 698296    |
| Amyloid beta (A4) precursor-like protein 2                              | APLP2    | 718819    |
| Anaphase promoting complex subunit 15                                   | ANAPC15  | 718333    |
| Anaphase promoting complex subunit 2                                    | ANAPC2   | 706384    |
| Anaphase promoting complex subunit 4                                    | ANAPC4   | 694006    |
| Ancient ubiquitous protein 1                                            | AUP1     | 710020    |
| Androgen-induced 1                                                      | AIG1     | 700988    |
| Angio associated migratory cell protein                                 | AAMP     | 700763    |
| Ankyrin 2, neuronal                                                     | ANK2     | 702180    |
| Ankyrin 3, node of Ranvier (ankyrin G)                                  | ANK3     | 699518    |
| Ankyrin repeat and IBR domain containing 1                              | ANKIB1   | 703273    |
| Ankyrin repeat and MYND domain containing 2                             | ANKMY2   | 709414    |
| Ankyrin repeat and SOCS box containing 3                                | ASB3     | 716503    |
| Ankyrin repeat domain 13C                                               | ANKRD13C | 702811    |
| Ankyrin repeat domain 2 (stretch responsive muscle)                     | ANKRD2   | 707097    |
| Ankyrin repeat domain 27                                                | ANKRD27  | 716232    |
| Ankyrin repeat domain 35                                                | ANKRD35  | 706961    |
| Ankyrin repeat domain 46                                                | ANKRD46  | 705491    |
| Ankyrin repeat domain 49                                                | ANKRD49  | 697693    |
| Ankyrin repeat domain 6                                                 | ANKRD6   | 701339    |
| Annexin A1                                                              | ANXA1    | 702946    |
| Annexin A11                                                             | ANXA11   | 707628    |
| Annexin A2                                                              | ANXA2    | 706240    |
| Annexin A3                                                              | ANXA3    | 697239    |
| Annexin A7                                                              | ANXA7    | 707166    |
| Anoctamin 10                                                            | ANO10    | 715666    |

|                                                                                          |          |           |
|------------------------------------------------------------------------------------------|----------|-----------|
| Anoctamin 4                                                                              | ANO4     | 695973    |
| Anterior gradient 2, protein disulphide isomerase family member                          | AGR2     | 709127    |
| Anterior gradient 3, protein disulphide isomerase family member                          | AGR3     | 714517    |
| Anti-silencing function 1A histone chaperone                                             | ASF1A    | 714761    |
| APEX nuclease (apurinic/apyrimidinic endonuclease) 2                                     | APEX2    | 702084    |
| APEX nuclease (multifunctional DNA repair enzyme) 1                                      | APEX1    | 702757    |
| Apolipoprotein B mrna editing enzyme, catalytic polypeptide-like 3H                      | APOBEC3H | 723811    |
| Apolipoprotein O                                                                         | APOO     | 698137    |
| Apoptosis inducing factor, mitochondria associated 1                                     | AIFM1    | 702773    |
| Apoptosis inhibitor 5                                                                    | API5     | 716346    |
| Aprataxin                                                                                | APTX     | 702671    |
| Aquaporin 11                                                                             | AQP11    | 698835    |
| Arfgap with gtpase domain, ankyrin repeat and PH domain 1                                | AGAP1    | 693652    |
| Arginine and glutamate rich 1                                                            | ARGLU1   | 702840    |
| Arginine/serine-rich coiled-coil 2                                                       | RSRC2    | 706564    |
| Arginine/serine-rich protein 1                                                           | RSRP1    | 712757    |
| Arginine-glutamic acid dipeptide (RE) repeats                                            | RERE     | 708902    |
| Arginyltransferase 1                                                                     | ATE1     | 705248    |
| Arginyl-trna synthetase                                                                  | RARS     | 698998    |
| Arginyl-trna synthetase 2, mitochondrial                                                 | RARS2    | 699240    |
| Armadillo repeat containing 9                                                            | ARMC9    | 711891    |
| Armadillo repeat containing, X-linked 5                                                  | ARMCX5   | 100427780 |
| Armadillo repeat gene deleted in velocardiofacial syndrome                               | ARVCF    | 712399    |
| ARP2 actin-related protein 2 homolog (yeast)                                             | ACTR2    | 697080    |
| ARP3 actin-related protein 3 homolog B (yeast)                                           | ACTR3B   | 715965    |
| ARP5 actin-related protein 5 homolog (yeast)                                             | ACTR5    | 698191    |
| Arrestin, beta 1                                                                         | ARRB1    | 695250    |
| Arrestin, beta 2                                                                         | ARRB2    | 709399    |
| Artemin                                                                                  | ARTN     | 701641    |
| ARV1 homolog, fatty acid homeostasis modulator                                           | ARV1     | 713975    |
| Aryl hydrocarbon receptor nuclear translocator like                                      | ARNTL    | 700464    |
| Asparagine synthetase (glutamine-hydrolyzing)                                            | ASNS     | 697232    |
| Aspartate beta-hydroxylase domain containing 1                                           | ASPHD1   | 707467    |
| Aspartate dehydrogenase domain containing                                                | ASPDH    | 719609    |
| Aspartoacylase                                                                           | ASPA     | 706170    |
| Aspartyl aminopeptidase                                                                  | DNPEP    | 703180    |
| Asteroid homolog 1 (Drosophila)                                                          | ASTE1    | 719271    |
| Ataxin 2-like                                                                            | ATXN2L   | 708359    |
| ATP binding cassette subfamily A member 1                                                | ABCA1    | 716146    |
| ATP binding cassette subfamily C member 9                                                | ABCC9    | 654489    |
| ATP binding cassette subfamily D member 1                                                | ABCD1    | 696794    |
| ATP binding cassette subfamily E member 1                                                | ABCE1    | 701945    |
| ATP synthase F0 subunit 6                                                                | ATP6     | 2846629   |
| ATP synthase mitochondrial F1 complex assembly factor 1                                  | ATPAF1   | 708798    |
| ATP synthase mitochondrial F1 complex assembly factor 2                                  | ATPAF2   | 699709    |
| ATP synthase, H+ transporting, mitochondrial F1 complex, alpha subunit 1, cardiac muscle | ATP5A1   | 701389    |

|                                                                                          |          |           |
|------------------------------------------------------------------------------------------|----------|-----------|
| ATP synthase, H <sup>+</sup> transporting, mitochondrial F1 complex, beta polypeptide    | ATP5B    | 713284    |
| ATP synthase, H <sup>+</sup> transporting, mitochondrial F1 complex, delta subunit       | ATP5D    | 705944    |
| ATP synthase, H <sup>+</sup> transporting, mitochondrial F1 complex, gamma polypeptide 1 | ATP5C1   | 713768    |
| ATP synthase, H <sup>+</sup> transporting, mitochondrial F1 complex, O subunit           | ATP5O    | 698480    |
| ATP synthase, H <sup>+</sup> transporting, mitochondrial Fo complex subunit F6           | ATP5J    | 708411    |
| ATPase inhibitory factor 1                                                               | ATPIF1   | 716870    |
| ATPase type 13A1                                                                         | ATP13A1  | 100427506 |
| ATPase, Ca <sup>++</sup> transporting, plasma membrane 1                                 | ATP2B1   | 709102    |
| ATPase, H <sup>+</sup> transporting, lysosomal 14kda, V1 subunit F                       | ATP6V1F  | 702112    |
| ATPase, H <sup>+</sup> transporting, lysosomal 21kda, V0 subunit b                       | ATP6V0B  | 702243    |
| ATPase, H <sup>+</sup> transporting, lysosomal 31kda, V1 subunit E1                      | ATP6V1E1 | 709739    |
| ATPase, H <sup>+</sup> transporting, lysosomal 9kda, V0 subunit e1                       | ATP6V0E1 | 703342    |
| ATPase, H <sup>+</sup> transporting, lysosomal accessory protein 2                       | ATP6AP2  | 705048    |
| ATPase, H <sup>+</sup> /K <sup>+</sup> exchanging, alpha polypeptide                     | ATP4A    | 100426215 |
| ATPase, Na <sup>+</sup> /K <sup>+</sup> transporting, alpha 1 polypeptide                | ATP1A1   | 710368    |
| ATPase, Na <sup>+</sup> /K <sup>+</sup> transporting, beta 3 polypeptide                 | ATP1B3   | 716682    |
| ATR interacting protein                                                                  | ATRIP    | 710035    |
| ATR serine/threonine kinase                                                              | ATR      | 714443    |
| AT-rich interaction domain 2                                                             | ARID2    | 703823    |
| AT-rich interaction domain 4B                                                            | ARID4B   | 718320    |
| Aurora kinase A interacting protein 1                                                    | AURKAIP1 | 706329    |
| Aurora kinase B                                                                          | AURKB    | 721955    |
| Aurora kinase C                                                                          | AURKC    | 709801    |
| Autophagy related 101                                                                    | ATG101   | 696954    |
| Autophagy related 16 like 1                                                              | ATG16L1  | 714092    |
| Autophagy related 16 like 2                                                              | ATG16L2  | 717952    |
| Autophagy related 2A                                                                     | ATG2A    | 717290    |
| Autophagy related 3                                                                      | ATG3     | 708305    |
| Autophagy related 4C, cysteine peptidase                                                 | ATG4C    | 695606    |
| Autophagy related 4D, cysteine peptidase                                                 | ATG4D    | 713111    |
| Autophagy related 5                                                                      | ATG5     | 696874    |
| Autophagy related 7                                                                      | ATG7     | 696238    |
| B9 protein domain 2                                                                      | B9D2     | 704873    |
| Bardet-Biedl syndrome 12                                                                 | BBS12    | 710538    |
| Bardet-Biedl syndrome 2                                                                  | BBS2     | 700353    |
| Bardet-Biedl syndrome 4                                                                  | BBS4     | 704508    |
| Bardet-Biedl syndrome 5                                                                  | BBS5     | 709701    |
| Basic leucine zipper and W2 domains 1                                                    | BZW1     | 701731    |
| Basic leucine zipper and W2 domains 2                                                    | BZW2     | 714627    |
| Basic transcription factor 3                                                             | BTF3     | 703339    |
| B-cell CLL/lymphoma 6                                                                    | BCL6     | 708736    |
| B-cell CLL/lymphoma 7B                                                                   | BCL7B    | 716470    |
| B-cell receptor-associated protein 31                                                    | BCAP31   | 696663    |



|                                                                      |         |        |
|----------------------------------------------------------------------|---------|--------|
| B-cell translocation gene 1, anti-proliferative                      | BTG1    | 710112 |
| BCL2 associated athanogene 3                                         | BAG3    | 714420 |
| BCL2/adenovirus E1B 19kda interacting protein 2                      | BNIP2   | 703234 |
| BCL2-associated X protein                                            | BAX     | 718948 |
| BCS1-like (S. Cerevisiae)                                            | BCS1L   | 699690 |
| Beclin 1, autophagy related                                          | BECN1   | 711649 |
| BEN domain containing 5                                              | BEND5   | 711150 |
| BEN domain containing 6                                              | BEND6   | 712498 |
| Beta-1,3-galactosyltransferase 4                                     | B3GALT4 | 718178 |
| Beta-1,3-glucuronyltransferase 3                                     | B3GAT3  | 718744 |
| Beta-1,4-glucuronyltransferase 1                                     | B4GAT1  | 714270 |
| Beta-2-microglobulin                                                 | B2M     | 712428 |
| Bicaudal D homolog 2 (Drosophila)                                    | BICD2   | 706621 |
| Bicaudal D homolog 2 (Drosophila)                                    | BICD2   | 706621 |
| Biliverdin reductase A                                               | BLVRA   | 700980 |
| Bisphosphoglycerate mutase                                           | BPGM    | 706741 |
| Bladder cancer associated protein                                    | BLCAP   | 708044 |
| BLOC-1 related complex subunit 5                                     | BORCS5  | 696469 |
| Bloom syndrome, recq helicase-like                                   | BLM     | 703460 |
| Bola family member 1                                                 | BOLA1   | 705297 |
| Bola family member 3                                                 | BOLA3   | 707871 |
| Bone morphogenetic protein 1                                         | BMP1    | 707596 |
| Bone morphogenetic protein 4                                         | BMP4    | 694618 |
| Bone morphogenetic protein/retinoic acid inducible neural-specific 1 | BRINP1  | 701794 |
| Bora, aurora kinase A activator                                      | BORA    | 693798 |
| BPI fold containing family A member 2                                | BPIFA2  | 710376 |
| Brain and reproductive organ-expressed (TNFRSF1A modulator)          | BRE     | 702365 |
| Brain protein I3                                                     | BRI3    | 706525 |
| Branched chain keto acid dehydrogenase E1, beta polypeptide          | BCKDHB  | 718472 |
| Branched chain ketoacid dehydrogenase kinase                         | BCKDK   | 712985 |
| BRCA1 associated RING domain 1                                       | BARD1   | 694301 |
| BRCA2 and CDKN1A interacting protein                                 | BCCIP   | 699437 |
| BRISC and BRCA1 A complex member 1                                   | BABAM1  | 718969 |
| Bromo adjacent homology domain containing 1                          | BAHD1   | 702982 |
| Bromodomain adjacent to zinc finger domain 1B                        | BAZ1B   | 716436 |
| Bromodomain and PHD finger containing 3                              | BRPF3   | 718997 |
| Bromodomain containing 1                                             | BRD1    | 715059 |
| Bromodomain containing 2                                             | BRD2    | 717893 |
| Bromodomain containing 7                                             | BRD7    | 694850 |
| Bruton agammaglobulinemia tyrosine kinase                            | BTK     | 703000 |
| BRX1, biogenesis of ribosomes                                        | BRX1    | 698745 |
| BTB (POZ) domain containing 1                                        | BTBD1   | 718696 |
| BTG family member 3                                                  | BTG3    | 710579 |
| BTG3 associated nuclear protein                                      | BANP    | 696125 |
| BUB3 mitotic checkpoint protein                                      | BUB3    | 708033 |
| Bystin like                                                          | BYSL    | 694976 |
| C2CD2-like                                                           | C2CD2L  | 703424 |
| Cache domain containing 1                                            | CACHD1  | 701608 |

|                                                                                  |         |           |
|----------------------------------------------------------------------------------|---------|-----------|
| Cadherin 11, type 2, OB-cadherin (osteoblast)                                    | CDH11   | 708826    |
| Cadherin 2, type 1, N-cadherin (neuronal)                                        | CDH2    | 711526    |
| Cadherin related family member 2                                                 | CDHR2   | 697249    |
| Calcitonin-related polypeptide alpha                                             | CALCA   | 700649    |
| Calcium and integrin binding family member 2                                     | CIB2    | 709429    |
| Calcium binding protein 39                                                       | CAB39   | 711166    |
| Calcium binding tyrosine-(Y)-phosphorylation regulated                           | CABYR   | 701670    |
| Calcium homeostasis endoplasmic reticulum protein                                | CHERP   | 718689    |
| Calcium/calmodulin-dependent protein kinase II delta                             | CAMK2D  | 702504    |
| Calcium/calmodulin-dependent protein kinase II gamma                             | CAMK2G  | 705980    |
| Caldesmon 1                                                                      | CALD1   | 707050    |
| Calmin (calponin-like, transmembrane)                                            | CLMN    | 709910    |
| Calmodulin regulated spectrin associated protein family member 2                 | CAMSAP2 | 709092    |
| Calnexin                                                                         | CANX    | 704794    |
| Calpain 10                                                                       | CAPN10  | 716360    |
| Calpain 15                                                                       | CAPN15  | 695881    |
| Calpain 2, (m/II) large subunit                                                  | CAPN2   | 703047    |
| Calpain 3                                                                        | CAPN3   | 707913    |
| Calponin 3, acidic                                                               | CNN3    | 709538    |
| Calreticulin                                                                     | CALR    | 716910    |
| Calumenin                                                                        | CALU    | 699730    |
| Camp responsive element binding protein 3                                        | CREB3   | 696350    |
| Camp responsive element binding protein 3-like 4                                 | CREB3L4 | 715951    |
| CAP, adenylate cyclase-associated protein 1 (yeast)                              | CAP1    | 693719    |
| Capping protein (actin filament) muscle Z-line, alpha 1                          | CAPZA1  | 705653    |
| Capping protein (actin filament), gelsolin-like                                  | CAPG    | 695288    |
| Caprin family member 2                                                           | CAPRIN2 | 693594    |
| Carbamoyl-phosphate synthetase 2, aspartate transcarbamylase, and dihydroorotase | CAD     | 699460    |
| Carbohydrate (chondroitin 4) sulfotransferase 13                                 | CHST13  | 716548    |
| Carbohydrate (keratan sulfate Gal-6) sulfotransferase 1                          | CHST1   | 715176    |
| Carbohydrate (N-acetylgalactosamine 4-O) sulfotransferase 14                     | CHST14  | 703115    |
| Carbohydrate (N-acetylgalactosamine 4-sulfate 6-O) sulfotransferase 15           | CHST15  | 693845    |
| Carbohydrate (N-acetylglucosamine 6-O) sulfotransferase 7                        | CHST7   | 704906    |
| Carboxypeptidase A5                                                              | CPA5    | 702974    |
| Carboxypeptidase N subunit 2                                                     | CPN2    | 106997189 |
| Carboxypeptidase Q                                                               | CPQ     | 701711    |
| Carboxypeptidase, vitellogenic-like                                              | CPVL    | 697111    |
| Cardiotrophin 1                                                                  | CTF1    | 713850    |
| Carnitine O-acetyltransferase                                                    | CRAT    | 716908    |
| Carnitine palmitoyltransferase 1A (liver)                                        | CPT1A   | 709837    |
| Carnitine palmitoyltransferase 1B                                                | CPT1B   | 720697    |
| Carnitine palmitoyltransferase 2                                                 | CPT2    | 714150    |
| Carnosine dipeptidase 1 (metallopeptidase M20 family)                            | CNDP1   | 695195    |
| Cartilage acidic protein 1                                                       | CRTAC1  | 707486    |
| Casein kinase 2, alpha 1 polypeptide                                             | CSNK2A1 | 714841    |
| Casein kinase 2, beta polypeptide                                                | CSNK2B  | 715807    |

|                                                               |            |           |
|---------------------------------------------------------------|------------|-----------|
| Caseinolytic mitochondrial matrix peptidase chaperone subunit | CLPX       | 708954    |
| Caspase 1                                                     | CASP1      | 706568    |
| Caspase 4                                                     | CASP4      | 704864    |
| Caspase 8 associated protein 2                                | CASP8AP2   | 702294    |
| Caspase 9                                                     | CASP9      | 694544    |
| Caspase activity and apoptosis inhibitor 1                    | CAAP1      | 707992    |
| Caspase recruitment domain family member 9                    | CARD9      | 710485    |
| Cat eye syndrome chromosome region, candidate 5               | CECR5      | 709197    |
| Catalase                                                      | CAT        | 717406    |
| Catechol-O-methyltransferase                                  | COMT       | 712548    |
| Catenin alpha-like 1                                          | CTNNAL1    | 710389    |
| Catenin beta 1                                                | CTNNB1     | 574265    |
| Catenin delta 1                                               | CTNND1     | 704212    |
| Cathepsin A                                                   | CTSA       | 708592    |
| Cathepsin B                                                   | CTSB       | 100424758 |
| Cathepsin C                                                   | CTSC       | 705320    |
| Cathepsin L                                                   | CTSL       | 694569    |
| Cation channel, sperm associated 2                            | CATSPER2   | 710876    |
| Caudal type homeobox 1                                        | CDX1       | 711837    |
| Caudal type homeobox 4                                        | CDX4       | 701374    |
| Cbl proto-oncogene B, E3 ubiquitin protein ligase             | CBLB       | 703879    |
| CCAAT/enhancer binding protein (C/EBP), zeta                  | CEBPZ      | 712090    |
| CCR4-NOT transcription complex subunit 1                      | CNOT1      | 712880    |
| CCR4-NOT transcription complex subunit 3                      | CNOT3      | 693292    |
| CCR4-NOT transcription complex subunit 7                      | CNOT7      | 702192    |
| CD19 molecule                                                 | CD19       | 705211    |
| CD1c molecule                                                 | CD1C       | 717148    |
| CD2 (cytoplasmic tail) binding protein 2                      | CD2BP2     | 709961    |
| CD200 molecule                                                | CD200      | 708110    |
| CD274 molecule                                                | CD274      | 716043    |
| CD2-associated protein                                        | CD2AP      | 705221    |
| CD300 molecule like family member f                           | CD300LF    | 703830    |
| CD4 molecule                                                  | CD4        | 713807    |
| CD58 molecule                                                 | CD58       | 710732    |
| CD63 molecule                                                 | CD63       | 709828    |
| CD7 molecule                                                  | CD7        | 719501    |
| CD9 molecule                                                  | CD9        | 712262    |
| CDC like kinase 3                                             | CLK3       | 702511    |
| CDC28 protein kinase regulatory subunit 1B                    | CKS1B      | 717164    |
| CDGSH iron sulfur domain 1                                    | CISD1      | 701716    |
| CDK5 regulatory subunit associated protein 3                  | CDK5RAP3   | 695189    |
| CDKN2A interacting protein N-terminal like                    | CDKN2AIPNL | 710774    |
| Cell cycle and apoptosis regulator 2                          | CCAR2      | 716288    |
| Cell death-inducing DFFA-like effector b                      | CIDEB      | 100425328 |
| Cell division cycle 123                                       | CDC123     | 694239    |
| Cell division cycle 16                                        | CDC16      | 699089    |
| Cell division cycle 23                                        | CDC23      | 714000    |
| Cell division cycle 25C                                       | CDC25C     | 714115    |

|                                                         |            |        |
|---------------------------------------------------------|------------|--------|
| Cell division cycle 26                                  | CDC26      | 706165 |
| Cell division cycle 37                                  | CDC37      | 715390 |
| Cell division cycle 37-like 1                           | CDC37L1    | 694831 |
| Cell division cycle 5 like                              | CDC5L      | 703099 |
| Cell division cycle 7                                   | CDC7       | 704730 |
| Cell division cycle and apoptosis regulator 1           | CCAR1      | 693585 |
| Cell division cycle associated 3                        | CDCA3      | 722088 |
| Cell division cycle associated 5                        | CDCA5      | 721998 |
| Cell division cycle associated 7                        | CDCA7      | 696474 |
| Cell division cycle associated 8                        | CDCA8      | 719808 |
| Cell growth regulator with ring finger domain 1         | CGRRF1     | 695231 |
| Centrin 2                                               | CETN2      | 693376 |
| Centrin 3                                               | CETN3      | 695223 |
| Centriolin                                              | CNTRL      | 700200 |
| Centromere protein C                                    | CENPC      | 710620 |
| Centromere protein F                                    | CENPF      | 709000 |
| Centromere protein J                                    | CENPJ      | 721498 |
| Centromere protein W                                    | CENPW      | 712570 |
| Centrosomal protein 192kda                              | CEP192     | 722121 |
| Centrosomal protein 290kda                              | CEP290     | 708286 |
| Centrosomal protein 41kda                               | CEP41      | 703215 |
| Centrosomal protein 57kda-like 1                        | CEP57L1    | 700109 |
| Centrosomal protein 70kda                               | CEP70      | 716263 |
| Centrosomal protein 72kda                               | CEP72      | 708753 |
| Centrosomal protein 83kda                               | CEP83      | 711408 |
| Ceramide synthase 2                                     | CERS2      | 716180 |
| Ceramide synthase 5                                     | CERS5      | 713449 |
| Cerebellar degeneration related protein 2               | CDR2       | 698974 |
| CGG triplet repeat binding protein 1                    | CGGBP1     | 693920 |
| Chaperonin containing TCP1, subunit 2 (beta)            | CCT2       | 717182 |
| Chaperonin containing TCP1, subunit 3 (gamma)           | CCT3       | 718374 |
| Chaperonin containing TCP1, subunit 8 (theta)           | CCT8       | 706184 |
| Charged multivesicular body protein 2A                  | CHMP2A     | 712059 |
| Charged multivesicular body protein 4B                  | CHMP4B     | 709004 |
| Charged multivesicular body protein 5                   | CHMP5      | 703191 |
| Checkpoint kinase 2                                     | CHEK2      | 713668 |
| Chemokine (C-C motif) ligand 25                         | CCL25      | 574219 |
| Chemokine (C-C motif) ligand 27                         | CCL27      | 574220 |
| Chemokine (C-X-C motif) receptor 4                      | CXCR4      | 707329 |
| Chemokine (C-X-C motif) receptor 4                      | CXCR4      | 707329 |
| Chemokine-like factor                                   | CKLF       | 693673 |
| Chloride intracellular channel 4                        | CLIC4      | 712337 |
| Choline/ethanolamine phosphotransferase 1               | CEPT1      | 702700 |
| Cholinergic receptor, nicotinic alpha 7                 | CHRNA7     | 574230 |
| Chondroitin sulfate N-acetylgalactosaminyltransferase 2 | CSGALNACT2 | 703703 |
| Chromatin target of PRMT1                               | CHTOP      | 715501 |
| Chromobox 1                                             | CBX1       | 696673 |
| Chromodomain helicase DNA binding protein 1             | CHD1       | 702070 |

|                                                  |             |           |
|--------------------------------------------------|-------------|-----------|
| Chromodomain helicase DNA binding protein 3      | CHD3        | 716508    |
| Chromosome 1 open reading frame, human c1orf123  | C1H1orf123  | 714201    |
| Chromosome 1 open reading frame, human c1orf131  | C1H1orf131  | 719141    |
| Chromosome 1 open reading frame, human c1orf198  | C1H1orf198  | 714084    |
| Chromosome 1 open reading frame, human c1orf50   | C1H1orf50   | 698058    |
| Chromosome 1 open reading frame, human c1orf52   | C1H1orf52   | 711232    |
| Chromosome 1 open reading frame, human c1orf54   | C1H1orf54   | 107000835 |
| Chromosome 1 open reading frame, human c1orf74   | C1H1orf74   | 713029    |
| Chromosome 10 open reading frame, human c20orf27 | C10H20orf27 | 717525    |
| Chromosome 11 open reading frame, human c12orf4  | C11H12orf4  | 710836    |
| Chromosome 11 open reading frame, human c12orf66 | C11H12orf66 | 717230    |
| Chromosome 12 open reading frame, human c2orf47  | C12H2orf47  | 699322    |
| Chromosome 14 open reading frame, human c11orf68 | C14H11orf68 | 715318    |
| Chromosome 14 open reading frame, human c11orf73 | C14H11orf73 | 704098    |
| Chromosome 16 open reading frame, human c17orf49 | C16H17orf49 | 713820    |
| Chromosome 16 open reading frame, human c17orf62 | C16H17orf62 | 716212    |
| Chromosome 18 open reading frame, human c18orf21 | C18H18orf21 | 715440    |
| Chromosome 19 open reading frame, human c19orf53 | C19H19orf53 | 720745    |
| Chromosome 2 open reading frame, human c3orf18   | C2H3orf18   | 701675    |
| Chromosome 2 open reading frame, human c3orf52   | C2H3orf52   | 100430016 |
| Chromosome 2 open reading frame, human c3orf58   | C2H3orf58   | 713830    |
| Chromosome 20 open reading frame 24 ortholog     | C10H20orf24 | 709696    |
| Chromosome 20 open reading frame, human c16orf13 | C20H16orf13 | 696495    |
| Chromosome 20 open reading frame, human c16orf62 | C20H16orf62 | 695027    |
| Chromosome 20 open reading frame, human c16orf78 | C20H16orf78 | 693672    |
| Chromosome 3 open reading frame, human c21orf91  | C3H21orf91  | 710406    |
| Chromosome 3 open reading frame, human c7orf25   | C3H7orf25   | 708455    |
| Chromosome 3 open reading frame, human c7orf60   | C3H7orf60   | 704714    |
| Chromosome 4 open reading frame, human c6orf1    | C4H6orf1    | 718551    |
| Chromosome 4 open reading frame, human c6orf136  | C4H6orf136  | 712108    |
| Chromosome 4 open reading frame, human c6orf203  | C4H6orf203  | 698108    |
| Chromosome 4 open reading frame, human c6orf89   | C4H6orf89   | 719165    |
| Chromosome 5 open reading frame, human c4orf27   | C5H4orf27   | 694607    |
| Chromosome 6 open reading frame, human c5orf22   | C6H5orf22   | 695901    |
| Chromosome 6 open reading frame, human c5orf34   | C6H5orf34   | 700618    |
| Chromosome 7 open reading frame, human c14orf142 | C7H14orf142 | 704509    |
| Chromosome 7 open reading frame, human c14orf166 | C7H14orf166 | 710094    |
| Chromosome 8 open reading frame, human c8orf59   | C8H8orf59   | 703464    |
| Chromosome 8 open reading frame, human c8orf76   | C8H8orf76   | 704150    |
| Chromosome 9 open reading frame, human c10orf2   | C9H10orf2   | 710958    |
| Chromosome 9 open reading frame, human c10orf88  | C9H10orf88  | 707385    |
| Chromosome 9 open reading frame, human c10orf90  | C9H10orf90  | 696655    |
| Chromosome X open reading frame, human cxorf23   | CXHXorf23   | 696449    |
| Chromosome X open reading frame, human cxorf40a  | CXHXorf40A  | 702659    |
| Cilia and flagella associated protein 43         | CFAP43      | 716031    |
| Cilia and flagella associated protein 65         | CFAP65      | 701296    |
| Ciliary neurotrophic factor                      | CNTF        | 701907    |
| Circadian associated repressor of transcription  | CIART       | 706693    |

|                                                          |         |        |
|----------------------------------------------------------|---------|--------|
| Citrate lyase beta like                                  | CLYBL   | 699339 |
| CKLF-like MARVEL transmembrane domain containing 8       | CMTM8   | 704234 |
| Clathrin, light chain A                                  | CLTA    | 693659 |
| Claudin 12                                               | CLDN12  | 704058 |
| Claudin 15                                               | CLDN15  | 719637 |
| Claudin 3                                                | CLDN3   | 716771 |
| Cleavage and polyadenylation factor I subunit 1          | CLP1    | 705071 |
| Cleavage and polyadenylation specific factor 4           | CPSF4   | 708119 |
| Cleavage stimulation factor, 3' pre-RNA, subunit 2       | CSTF2   | 701235 |
| Cleavage stimulation factor, 3' pre-RNA, subunit 3       | CSTF3   | 694040 |
| Cleft lip and palate associated transmembrane protein 1  | CLPTM1  | 718306 |
| Cms1 ribosomal small subunit homolog (yeast)             | CMSS1   | 699717 |
| Coatmer protein complex subunit beta 1                   | COPB1   | 699327 |
| Coatmer protein complex subunit epsilon                  | COPE    | 719631 |
| Coatmer protein complex subunit zeta 1                   | COPZ1   | 705176 |
| Codanin 1                                                | CDAN1   | 708838 |
| Coenzyme Q10A                                            | COQ10A  | 712341 |
| Coenzyme Q2 4-hydroxybenzoate polyprenyltransferase      | COQ2    | 707681 |
| Cofilin 1 (non-muscle)                                   | CFL1    | 721882 |
| Cofilin 2 (muscle)                                       | CFL2    | 693875 |
| Coiled-coil domain containing 12                         | CCDC12  | 712061 |
| Coiled-coil domain containing 142                        | CCDC142 | 709014 |
| Coiled-coil domain containing 174                        | CCDC174 | 701654 |
| Coiled-coil domain containing 178                        | CCDC178 | 707566 |
| Coiled-coil domain containing 181                        | CCDC181 | 700803 |
| Coiled-coil domain containing 28A                        | CCDC28A | 703104 |
| Coiled-coil domain containing 36                         | CCDC36  | 707136 |
| Coiled-coil domain containing 43                         | CCDC43  | 715325 |
| Coiled-coil domain containing 59                         | CCDC59  | 698443 |
| Coiled-coil domain containing 82                         | CCDC82  | 700198 |
| Coiled-coil domain containing 90B                        | CCDC90B | 702035 |
| Coiled-coil domain containing 92                         | CCDC92  | 705922 |
| Coiled-coil domain containing 97                         | CCDC97  | 706342 |
| Coiled-coil serine rich protein 2                        | CCSER2  | 698006 |
| Coiled-coil-helix-coiled-coil-helix domain containing 1  | CHCHD1  | 706322 |
| Coiled-coil-helix-coiled-coil-helix domain containing 10 | CHCHD10 | 720205 |
| Coiled-coil-helix-coiled-coil-helix domain containing 2  | CHCHD2  | 702967 |
| Coiled-coil-helix-coiled-coil-helix domain containing 2  | CHCHD2  | 702967 |
| Coiled-coil-helix-coiled-coil-helix domain containing 6  | CHCHD6  | 716767 |
| Coilin                                                   | COIL    | 708103 |
| Cold shock domain containing E1, RNA binding             | CSDE1   | 708897 |
| Collagen triple helix repeat containing 1                | CTHRC1  | 694882 |
| Collagen, type III, alpha 1                              | COL3A1  | 574131 |
| Collagen, type XII, alpha 1                              | COL12A1 | 717820 |
| COMM domain containing 2                                 | COMMD2  | 711498 |
| COMM domain containing 6                                 | COMMD6  | 695191 |
| Complement component 1, q subcomponent binding protein   | C1QBP   | 711817 |
| Complement factor properdin                              | CFP     | 707386 |

|                                                                       |         |           |
|-----------------------------------------------------------------------|---------|-----------|
| Component of oligomeric golgi complex 1                               | COG1    | 695754    |
| Component of oligomeric golgi complex 4                               | COG4    | 712103    |
| Component of oligomeric golgi complex 6                               | COG6    | 697092    |
| Component of oligomeric golgi complex 7                               | COG7    | 700218    |
| Conserved helix-loop-helix ubiquitous kinase                          | CHUK    | 709511    |
| Coordinator of PRMT5, differentiation stimulator                      | COPRS   | 713293    |
| COP9 signalosome subunit 2                                            | COPS2   | 714814    |
| COP9 signalosome subunit 3                                            | COPS3   | 698461    |
| COP9 signalosome subunit 4                                            | COPS4   | 693435    |
| COP9 signalosome subunit 5                                            | COPS5   | 704584    |
| COP9 signalosome subunit 6                                            | COPS6   | 710667    |
| Copine II                                                             | CPNE2   | 703557    |
| Copine III                                                            | CPNE3   | 694013    |
| Core-binding factor, beta subunit                                     | CBFB    | 695767    |
| Core-binding factor, runt domain, alpha subunit 2; translocated to, 3 | CBFA2T3 | 698233    |
| Corepressor interacting with RBPJ, 1                                  | CIR1    | 698068    |
| Cornichon family AMPA receptor auxiliary protein 1                    | CNIH1   | 695002    |
| Cornichon family AMPA receptor auxiliary protein 4                    | CNIH4   | 701767    |
| Coronin, actin binding protein, 1B                                    | CORO1B  | 721725    |
| Cortactin                                                             | CTTN    | 708291    |
| COX19 cytochrome c oxidase assembly homolog (S. Cerevisiae)           | COX19   | 696368    |
| Craniofacial development protein 1                                    | CFDP1   | 711343    |
| Crumbs family member 3                                                | CRB3    | 700086    |
| Cryptochrome circadian clock 1                                        | CRY1    | 703752    |
| CSE1 chromosome segregation 1-like (yeast)                            | CSE1L   | 704301    |
| C-src tyrosine kinase                                                 | CSK     | 702868    |
| CTD phosphatase subunit 1                                             | CTDP1   | 698467    |
| CTD small phosphatase like 2                                          | CTDSP12 | 711917    |
| C-terminal binding protein 1                                          | CTBP1   | 694507    |
| C-terminal binding protein 2                                          | CTBP2   | 695124    |
| CTP synthase 1                                                        | CTPS1   | 695498    |
| CTR9 homolog, Paf1/RNA polymerase II complex component                | CTR9    | 705748    |
| C-type lectin domain family 1, member A                               | CLEC1A  | 717526    |
| C-type lectin domain family 9 member A                                | CLEC9A  | 717472    |
| CUE domain containing 2                                               | CUEDC2  | 713243    |
| CUGBP, Elav-like family member 3                                      | CELF3   | 716884    |
| Cullin 4A                                                             | CUL4A   | 714302    |
| Cullin 7                                                              | CUL7    | 699545    |
| Cullin-associated and neddylation-dissociated 1                       | CAND1   | 716184    |
| Cutc copper transporter                                               | CUTC    | 709050    |
| Cut-like homeobox 2                                                   | CUX2    | 107001015 |
| CWC15 spliceosome-associated protein                                  | CWC15   | 698332    |
| CWC22 homolog, spliceosome-associated protein                         | CWC22   | 704087    |
| CWF19-like 2, cell cycle control (S. Pombe)                           | CWF19L2 | 706825    |
| C-x(9)-C motif containing 1                                           | CMC1    | 705147    |
| CXXC finger protein 1                                                 | CXXC1   | 700341    |
| Cyclic nucleotide binding domain containing 2                         | CNBD2   | 703290    |
| Cyclin A2                                                             | CCNA2   | 707259    |

|                                                                  |         |           |
|------------------------------------------------------------------|---------|-----------|
| Cyclin and CBS domain divalent metal cation transport mediator 2 | CNNM2   | 714238    |
| Cyclin B2                                                        | CCNB2   | 702184    |
| Cyclin D binding myb-like transcription factor 1                 | DMTF1   | 706292    |
| Cyclin D3                                                        | CCND3   | 695215    |
| Cyclin D-type binding-protein 1                                  | CCNDBP1 | 709589    |
| Cyclin E1                                                        | CCNE1   | 700589    |
| Cyclin G1                                                        | CCNG1   | 697738    |
| Cyclin H                                                         | CCNH    | 694224    |
| Cyclin I                                                         | CCNI    | 677687    |
| Cyclin T2                                                        | CCNT2   | 708813    |
| Cyclin-dependent kinase 1                                        | CDK1    | 699269    |
| Cyclin-dependent kinase 12                                       | CDK12   | 696733    |
| Cyclin-dependent kinase 14                                       | CDK14   | 703442    |
| Cyclin-dependent kinase 17                                       | CDK17   | 717183    |
| Cyclin-dependent kinase 2                                        | CDK2    | 711002    |
| Cyclin-dependent kinase 2 associated protein 2                   | CDK2AP2 | 711640    |
| Cyclin-dependent kinase 2 interacting protein                    | CINP    | 709044    |
| Cyclin-dependent kinase 4                                        | CDK4    | 715650    |
| Cyclin-dependent kinase 9                                        | CDK9    | 699840    |
| Cyclin-dependent kinase inhibitor 2C (p18, inhibits CDK4)        | CDKN2C  | 711877    |
| Cyclin-dependent kinase inhibitor 2D (p19, inhibits CDK4)        | CDKN2D  | 713172    |
| Cyclin-dependent kinase inhibitor 3                              | CDKN3   | 694877    |
| Cystatin C                                                       | CST3    | 574313    |
| Cysteine/histidine-rich 1                                        | CYHR1   | 702522    |
| CysteinyI-trna synthetase                                        | CARS    | 706502    |
| CysteinyI-trna synthetase 2, mitochondrial (putative)            | CARS2   | 694840    |
| Cytidine monophosphate (UMP-CMP) kinase 1, cytosolic             | CMPK1   | 710196    |
| Cytidine monophosphate N-acetylneuraminic acid synthetase        | CMAS    | 706604    |
| Cytochrome b-245 heavy chain                                     | CYBB    | 696542    |
| Cytochrome b5 reductase 4                                        | CYB5R4  | 695553    |
| Cytochrome b5 type B (outer mitochondrial membrane)              | CYB5B   | 705093    |
| Cytochrome c oxidase subunit 5A                                  | COX5A   | 692061    |
| Cytochrome c oxidase subunit 6C                                  | COX6C   | 100428417 |
| Cytochrome c oxidase subunit IV isoform 1                        | COX4I1  | 693811    |
| Cytochrome c oxidase subunit viia polypeptide 2 like             | COX7A2L | 712764    |
| Cytochrome c oxidase subunit viic                                | COX7C   | 100429280 |
| Cytochrome c-1                                                   | CYC1    | 700518    |
| Cytochrome P450, family 2, subfamily D, polypeptide 6            | CYP2D6  | 678691    |
| Cytochrome P450, family 2, subfamily R, polypeptide 1            | CYP2R1  | 698834    |
| Cytochrome P450, family 21, subfamily A, polypeptide 2           | CYP21A2 | 717020    |
| Cytochrome P450c17                                               | CYP17A1 | 678693    |
| Cytokine induced apoptosis inhibitor 1                           | CIAPIN1 | 704770    |
| Cytokine like 1                                                  | CYTL1   | 711664    |
| Cytoplasmic polyadenylation element binding protein 1            | CPEB1   | 694357    |
| Cytoplasmic polyadenylation element binding protein 2            | CPEB2   | 722844    |
| Cytoskeleton associated protein 2 like                           | CKAP2L  | 704381    |
| Cytoskeleton associated protein 5                                | CKAP5   | 714095    |
| Cytosolic thiouridylase subunit 1                                | CTU1    | 719536    |



|                                                              |         |        |
|--------------------------------------------------------------|---------|--------|
| Dachshund family transcription factor 1                      | DACH1   | 693532 |
| Dachsous cadherin-related 1                                  | DCHS1   | 711938 |
| DALR anticodon binding domain containing 3                   | DALRD3  | 708403 |
| DAZ associated protein 2                                     | DAZAP2  | 695282 |
| DCN1, defective in cullin neddylation 1, domain containing 1 | DCUN1D1 | 708357 |
| DCN1, defective in cullin neddylation 1, domain containing 4 | DCUN1D4 | 702908 |
| DCN1, defective in cullin neddylation 1, domain containing 5 | DCUN1D5 | 704099 |
| Dctp pyrophosphatase 1                                       | DCTPP1  | 710500 |
| DDB1 and CUL4 associated factor 11                           | DCAF11  | 714867 |
| DDB1 and CUL4 associated factor 4                            | DCAF4   | 695337 |
| DDB1 and CUL4 associated factor 6                            | DCAF6   | 698686 |
| D-dopachrome tautomerase                                     | DDT     | 699933 |
| DEAD (Asp-Glu-Ala-Asp) box helicase 1                        | DDX1    | 698327 |
| DEAD (Asp-Glu-Ala-Asp) box helicase 42                       | DDX42   | 717964 |
| DEAD (Asp-Glu-Ala-Asp) box helicase 5                        | DDX5    | 677694 |
| DEAD (Asp-Glu-Ala-Asp) box polypeptide 27                    | DDX27   | 703852 |
| DEAD (Asp-Glu-Ala-Asp) box polypeptide 39A                   | DDX39A  | 718822 |
| DEAD (Asp-Glu-Ala-Asp) box polypeptide 41                    | DDX41   | 700742 |
| DEAD (Asp-Glu-Ala-Asp) box polypeptide 50                    | DDX50   | 712511 |
| DEAD (Asp-Glu-Ala-Asp) box polypeptide 54                    | DDX54   | 712763 |
| DEAD/H (Asp-Glu-Ala-Asp/His) box polypeptide 26B             | DDX26B  | 709688 |
| Deafness, autosomal recessive 31                             | DFNB31  | 708051 |
| DEAH (Asp-Glu-Ala-His) box helicase 15                       | DHX15   | 715852 |
| DEAH (Asp-Glu-Ala-His) box helicase 30                       | DHX30   | 711178 |
| DEAH (Asp-Glu-Ala-His) box helicase 9                        | DHX9    | 715453 |
| DEAH (Asp-Glu-Ala-His) box polypeptide 29                    | DHX29   | 706306 |
| DEAH (Asp-Glu-Ala-His) box polypeptide 36                    | DHX36   | 708112 |
| DEAH (Asp-Glu-Ala-His) box polypeptide 38                    | DHX38   | 709173 |
| DEAH (Asp-Glu-Ala-His) box polypeptide 40                    | DHX40   | 715202 |
| Death associated protein 3                                   | DAP3    | 719314 |
| Death inducer-obliterators 1                                 | DIDO1   | 698313 |
| Decapping exoribonuclease                                    | DXO     | 716027 |
| Decapping mrna 1B                                            | DCP1B   | 708089 |
| Dedicator of cytokinesis 5                                   | DOCK5   | 711359 |
| De-etiolated homolog 1 (Arabidopsis)                         | DET1    | 697994 |
| Defender against cell death 1                                | DAD1    | 711840 |
| Defensin beta 118                                            | DEFB118 | 641438 |
| Dehydrodolichyl diphosphate synthase subunit                 | DHDDS   | 714635 |
| Dehydrogenase/reductase (SDR family) member 1                | DHRS1   | 715933 |
| Dehydrogenase/reductase (SDR family) member 13               | DHRS13  | 710755 |
| Dehydrogenase/reductase (SDR family) member 3                | DHRS3   | 715548 |
| Dehydrogenase/reductase (SDR family) member 4 like 1         | DHRS4L1 | 714661 |
| Dehydrogenase/reductase (SDR family) member 4 like 1         | DHRS4L1 | 714661 |
| Deiodinase, iodothyronine, type II                           | DIO2    | 707484 |
| DEK proto-oncogene                                           | DEK     | 712460 |
| Delta-like 1 homolog (Drosophila)                            | DLK1    | 707595 |
| Deltex 3, E3 ubiquitin ligase                                | DTX3    | 715175 |
| DENN/MADD domain containing 2D                               | DENND2D | 702568 |

|                                                               |          |           |
|---------------------------------------------------------------|----------|-----------|
| DENN/MADD domain containing 5A                                | DENND5A  | 707945    |
| Denticleless E3 ubiquitin protein ligase homolog (Drosophila) | DTL      | 711236    |
| Deoxyguanosine kinase                                         | DGUOK    | 707554    |
| Deoxyhypusine synthase                                        | DHPS     | 716213    |
| Deoxyribonuclease I                                           | DNASE1   | 704119    |
| Deoxythymidylate kinase                                       | DTYMK    | 701781    |
| DEP domain containing MTOR-interacting protein                | DEPTOR   | 702649    |
| Derlin 1                                                      | DERL1    | 703803    |
| Derlin 2                                                      | DERL2    | 712051    |
| Dermatan sulfate epimerase                                    | DSE      | 716054    |
| Desmoplakin                                                   | DSP      | 694860    |
| Destrin (actin depolymerizing factor)                         | DSTN     | 695969    |
| Desumoylating isopeptidase 2                                  | DESI2    | 713515    |
| Developmentally regulated GTP binding protein 1               | DRG1     | 716791    |
| Dexi homolog (mouse)                                          | DEXI     | 100430901 |
| Diacylglycerol kinase alpha                                   | DGKA     | 710559    |
| Dicer 1, ribonuclease type III                                | DICER1   | 702516    |
| Differentially expressed in FDCP 8 homolog (mouse)            | DEF8     | 699856    |
| Dihydrolipoamide S-acetyltransferase                          | DLAT     | 710930    |
| Dihydropyrimidinase like 3                                    | DPYSL3   | 708425    |
| Dihydrouridine synthase 3-like                                | DUS3L    | 719524    |
| Dimethylarginine dimethylaminohydrolase 1                     | DDAH1    | 711395    |
| Dipeptidyl-peptidase 8                                        | DPP8     | 709428    |
| Diphosphoinositol pentakisphosphate kinase 2                  | PIPIP5K2 | 703458    |
| Diphthamide biosynthesis 3                                    | DPH3     | 695309    |
| Diphthamide biosynthesis 5                                    | DPH5     | 712253    |
| Discoidin domain receptor tyrosine kinase 1                   | DDR1     | 714233    |
| Discoidin domain receptor tyrosine kinase 2                   | DDR2     | 720124    |
| Discs, large homolog 1 (Drosophila)                           | DLG1     | 709572    |
| Discs, large homolog 5 (Drosophila)                           | DLG5     | 703123    |
| Dishevelled segment polarity protein 1                        | DVL1     | 705864    |
| Dishevelled segment polarity protein 1                        | DVL1     | 705864    |
| Dispatched homolog 1 (Drosophila)                             | DISP1    | 703960    |
| Distal-less homeobox 5                                        | DLX5     | 697853    |
| DNA (cytosine-5-)-methyltransferase 1                         | DNMT1    | 574321    |
| DNA cross-link repair 1B                                      | DCLRE1B  | 707742    |
| Dnaj heat shock protein family (Hsp40) member A1              | DNAJA1   | 703765    |
| Dnaj heat shock protein family (Hsp40) member B1              | DNAJB1   | 718890    |
| Dnaj heat shock protein family (Hsp40) member B2              | DNAJB2   | 702936    |
| Dnaj heat shock protein family (Hsp40) member B6              | DNAJB6   | 693305    |
| Dnaj heat shock protein family (Hsp40) member C1              | DNAJC1   | 704151    |
| Dnaj heat shock protein family (Hsp40) member C12             | DNAJC12  | 695795    |
| Dnaj heat shock protein family (Hsp40) member C15             | DNAJC15  | 700339    |
| Dnaj heat shock protein family (Hsp40) member C27             | DNAJC27  | 694037    |
| Dnaj heat shock protein family (Hsp40) member C3              | DNAJC3   | 695757    |
| Dnaj heat shock protein family (Hsp40) member C5 beta         | DNAJC5B  | 702408    |
| Dnaj heat shock protein family (Hsp40) member C8              | DNAJC8   | 720231    |
| Dnaj heat shock protein family (Hsp40) member C9              | DNAJC9   | 707599    |

|                                                                          |         |           |
|--------------------------------------------------------------------------|---------|-----------|
| Docking protein 5                                                        | DOK5    | 698689    |
| Dolichyl-phosphate mannosyltransferase polypeptide 2, regulatory subunit | DPM2    | 698709    |
| Dolichyl-phosphate mannosyltransferase polypeptide 3                     | DPM3    | 717446    |
| Double C2-like domains, alpha                                            | DOC2A   | 707895    |
| Double zinc ribbon and ankyrin repeat domains 1                          | DZANK1  | 700143    |
| Dpy-30, histone methyltransferase complex regulatory subunit             | DPY30   | 706155    |
| DR1-associated protein 1 (negative cofactor 2 alpha)                     | DRAP1   | 715271    |
| Drosha, ribonuclease type III                                            | DROSHA  | 692081    |
| DTW domain containing 1                                                  | DTWD1   | 715084    |
| D-tyrosyl-trna deacylase 1                                               | DTD1    | 700895    |
| Dual serine/threonine and tyrosine protein kinase                        | DSTYK   | 664732    |
| Dual specificity phosphatase 11                                          | DUSP11  | 707123    |
| Dual specificity phosphatase 12                                          | DUSP12  | 720034    |
| Dual specificity phosphatase 14                                          | DUSP14  | 714383    |
| Dual specificity phosphatase 23                                          | DUSP23  | 719474    |
| Dual specificity phosphatase 26 (putative)                               | DUSP26  | 697134    |
| Dual specificity phosphatase 6                                           | DUSP6   | 708907    |
| Dual specificity tyrosine-(Y)-phosphorylation regulated kinase 3         | DYRK3   | 695163    |
| Dynactin subunit 1                                                       | DCTN1   | 708290    |
| Dynactin subunit 2                                                       | DCTN2   | 714948    |
| Dynactin subunit 6                                                       | DCTN6   | 694273    |
| Dynamamin 1-like                                                         | DNM1L   | 695388    |
| Dynamamin 1-like                                                         | DNM1L   | 695388    |
| Dynein, axonemal, assembly factor 2                                      | DNAAF2  | 719026    |
| Dynein, axonemal, light chain 4                                          | DNAL4   | 702019    |
| Dynein, cytoplasmic 1, intermediate chain 1                              | DYNC1I1 | 574351    |
| Dynein, light chain, LC8-type 1                                          | DYNLL1  | 702360    |
| Dynein, light chain, LC8-type 2                                          | DYNLL2  | 100423738 |
| Dynein, light chain, roadblock-type 2                                    | DYNLRB2 | 713503    |
| Dyskeratosis congenita 1, dyskerin                                       | DKC1    | 702563    |
| Dystrobrevin beta                                                        | DTNB    | 696167    |
| E1A binding protein p300                                                 | EP300   | 706258    |
| E2F transcription factor 1                                               | E2F1    | 714126    |
| E2F transcription factor 3                                               | E2F3    | 713904    |
| E2F transcription factor 4, p107/p130-binding                            | E2F4    | 696864    |
| E2F transcription factor 5, p130-binding                                 | E2F5    | 703352    |
| E2F-associated phosphoprotein                                            | EAPP    | 714727    |
| E74-like factor 2 (ets domain transcription factor)                      | ELF2    | 696760    |
| E74-like factor 5 (ets domain transcription factor)                      | ELF5    | 717377    |
| Ecdysoneless homolog (Drosophila)                                        | ECD     | 707699    |
| Ecotropic viral integration site 5-like                                  | EVI5L   | 706628    |
| Ectodermal-neural cortex 1 (with BTB domain)                             | ENC1    | 704577    |
| Ectodysplasin A receptor                                                 | EDAR    | 695059    |
| Ectonucleoside triphosphate diphosphohydrolase 7                         | ENTPD7  | 708844    |
| Ectonucleotide pyrophosphatase/phosphodiesterase 2                       | ENPP2   | 705287    |
| EF-hand calcium binding domain 7                                         | EFCAB7  | 696830    |
| EF-hand domain family member D2                                          | EFHD2   | 694155    |

|                                                           |         |        |
|-----------------------------------------------------------|---------|--------|
| EGF-like, fibronectin type III and laminin G domains      | EGFLAM  | 693314 |
| EGF-like-domain, multiple 7                               | EGFL7   | 709840 |
| EGF-like-domain, multiple 8                               | EGFL8   | 717145 |
| Egl-9 family hypoxia-inducible factor 2                   | EGLN2   | 703083 |
| EH domain binding protein 1                               | EHBP1   | 693902 |
| Electron-transferring-flavoprotein dehydrogenase          | ETFDH   | 701207 |
| ELMO/CED-12 domain containing 2                           | ELMOD2  | 698742 |
| ELMO/CED-12 domain containing 3                           | ELMOD3  | 695180 |
| ELOVL fatty acid elongase 1                               | ELOVL1  | 700557 |
| ELOVL fatty acid elongase 4                               | ELOVL4  | 692070 |
| Embryonic ectoderm development                            | EED     | 703866 |
| Emopamil binding protein (sterol isomerase)               | EBP     | 714315 |
| Empty spiracles homeobox 2                                | EMX2    | 701370 |
| Endonuclease domain containing 1                          | ENDOD1  | 699210 |
| Endonuclease G                                            | ENDOG   | 717171 |
| Endoplasmic reticulum lectin 1                            | ERLEC1  | 716460 |
| Endosulfine alpha                                         | ENSA    | 715857 |
| Endothelin 3                                              | EDN3    | 693385 |
| Enhancer of rudimentary homolog (Drosophila)              | ERH     | 712507 |
| Enhancer of yellow 2 homolog (Drosophila)                 | ENY2    | 699048 |
| Enhancer of zeste 1 polycomb repressive complex 2 subunit | EZH1    | 711173 |
| Enolase 1, (alpha)                                        | ENO1    | 709378 |
| Enoyl-coa delta isomerase 2                               | ECI2    | 709579 |
| EP300 interacting inhibitor of differentiation 3          | EID3    | 701175 |
| EPH receptor B6                                           | EPHB6   | 704886 |
| Ephrin-A3                                                 | EFNA3   | 717373 |
| Epididymal protein 3A                                     | EDDM3A  | 704355 |
| Epithelial cell transforming 2                            | ECT2    | 694056 |
| ER degradation enhancer, mannosidase alpha-like 3         | EDEM3   | 714475 |
| ER lipid raft associated 1                                | ERLIN1  | 709596 |
| ER membrane protein complex subunit 4                     | EMC4    | 695907 |
| ER membrane protein complex subunit 6                     | EMC6    | 707030 |
| ERGIC and golgi 3                                         | ERGIC3  | 704736 |
| ESF1 nucleolar pre-rRNA processing protein homolog        | ESF1    | 694159 |
| Esterase D                                                | ESD     | 708871 |
| Estrogen receptor binding site associated, antigen, 9     | EBAG9   | 699305 |
| Ethanolamine-phosphate phospho-lyase                      | ETNPPL  | 696880 |
| Ethylmalonyl-coa decarboxylase 1                          | ECHDC1  | 712072 |
| Etoposide induced 2.4                                     | EI24    | 713226 |
| Eukaryotic translation elongation factor 1 beta 2         | EEF1B2  | 707019 |
| Eukaryotic translation elongation factor 1 epsilon 1      | EEF1E1  | 695426 |
| Eukaryotic translation elongation factor 1 gamma          | EEF1G   | 722274 |
| Eukaryotic translation initiation factor 1                | EIF1    | 704606 |
| Eukaryotic translation initiation factor 2 subunit beta   | EIF2S2  | 708593 |
| Eukaryotic translation initiation factor 2-alpha kinase 3 | EIF2AK3 | 699575 |
| Eukaryotic translation initiation factor 2B subunit gamma | EIF2B3  | 705862 |
| Eukaryotic translation initiation factor 2D               | EIF2D   | 695274 |
| Eukaryotic translation initiation factor 3 subunit D      | EIF3D   | 695051 |

|                                                                     |           |           |
|---------------------------------------------------------------------|-----------|-----------|
| Eukaryotic translation initiation factor 3 subunit E                | EIF3E     | 697622    |
| Eukaryotic translation initiation factor 3 subunit H                | EIF3H     | 700517    |
| Eukaryotic translation initiation factor 3 subunit I                | EIF3I     | 708145    |
| Eukaryotic translation initiation factor 3 subunit K                | EIF3K     | 693536    |
| Eukaryotic translation initiation factor 3 subunit L                | EIF3L     | 699189    |
| Eukaryotic translation initiation factor 3 subunit M                | EIF3M     | 695698    |
| Eukaryotic translation initiation factor 4 gamma, 2                 | EIF4G2    | 705510    |
| Eukaryotic translation initiation factor 4A2                        | EIF4A2    | 707775    |
| Eukaryotic translation initiation factor 4A3                        | EIF4A3    | 712141    |
| Eukaryotic translation initiation factor 4E binding protein 3       | EIF4EBP3  | 100532740 |
| Eukaryotic translation initiation factor 4E family member 2         | EIF4E2    | 713487    |
| Eukaryotic translation initiation factor 4E nuclear import factor 1 | EIF4ENIF1 | 716871    |
| Eukaryotic translation initiation factor 4H                         | EIF4H     | 693429    |
| Eukaryotic translation termination factor 1                         | ETF1      | 714449    |
| Eva-1 homolog B (C. Elegans)                                        | EVA1B     | 713159    |
| EWS RNA binding protein 1                                           | EWSR1     | 714432    |
| Excision repair cross-complementation group 3                       | ERCC3     | 698829    |
| Exocyst complex component 1                                         | EXOC1     | 695664    |
| Exocyst complex component 2                                         | EXOC2     | 706296    |
| Exocyst complex component 4                                         | EXOC4     | 712458    |
| Exosome component 10                                                | EXOSC10   | 714153    |
| Exosome component 3                                                 | EXOSC3    | 716347    |
| Exosome component 5                                                 | EXOSC5    | 705203    |
| Exosome component 8                                                 | EXOSC8    | 695071    |
| Exostosin glycosyltransferase 1                                     | EXT1      | 701488    |
| Exostosin glycosyltransferase 2                                     | EXT2      | 715975    |
| Exportin 1                                                          | XPO1      | 718063    |
| Exportin 5                                                          | XPO5      | 700664    |
| Exportin 6                                                          | XPO6      | 704332    |
| Extended synaptotagmin-like protein 1                               | ESYT1     | 711720    |
| Extra spindle pole bodies like 1, separase                          | ESPL1     | 702136    |
| F11 receptor                                                        | F11R      | 719824    |
| Family with sequence similarity 103 member A1                       | FAM103A1  | 714660    |
| Family with sequence similarity 104 member A                        | FAM104A   | 695865    |
| Family with sequence similarity 110 member B                        | FAM110B   | 703840    |
| Family with sequence similarity 117 member A                        | FAM117A   | 700079    |
| Family with sequence similarity 129 member B                        | FAM129B   | 707403    |
| Family with sequence similarity 156 member B                        | FAM156B   | 698392    |
| Family with sequence similarity 160 member A2                       | FAM160A2  | 711641    |
| Family with sequence similarity 171 member B                        | FAM171B   | 712442    |
| Family with sequence similarity 175 member B                        | FAM175B   | 694886    |
| Family with sequence similarity 178 member B                        | FAM178B   | 710890    |
| Family with sequence similarity 179 member B                        | FAM179B   | 702188    |
| Family with sequence similarity 181 member B                        | FAM181B   | 701184    |
| Family with sequence similarity 206 member A                        | FAM206A   | 710486    |
| Family with sequence similarity 212 member A                        | FAM212A   | 704983    |
| Family with sequence similarity 219 member A                        | FAM219A   | 700651    |
| Family with sequence similarity 220 member A                        | FAM220A   | 703785    |

|                                                                                |         |        |
|--------------------------------------------------------------------------------|---------|--------|
| Family with sequence similarity 35 member A                                    | FAM35A  | 694102 |
| Family with sequence similarity 45 member A                                    | FAM45A  | 713269 |
| Family with sequence similarity 46 member A                                    | FAM46A  | 693306 |
| Family with sequence similarity 58 member A                                    | FAM58A  | 695925 |
| Family with sequence similarity 76 member B                                    | FAM76B  | 699581 |
| Family with sequence similarity 8 member A1                                    | FAM8A1  | 703789 |
| Family with sequence similarity 92 member A1                                   | FAM92A1 | 698794 |
| Fanconi anemia complementation group B                                         | FANCB   | 712083 |
| Fanconi anemia complementation group E                                         | FANCE   | 718889 |
| Fanconi anemia complementation group I                                         | FANCI   | 699878 |
| Farnesyl-diphosphate farnesyltransferase 1                                     | FDFT1   | 696396 |
| Farnesyltransferase, CAAX box, beta                                            | FNTB    | 708129 |
| Fas apoptotic inhibitory molecule                                              | FAIM    | 716216 |
| Fas associated via death domain                                                | FADD    | 708606 |
| Fasciculation and elongation protein zeta 1                                    | FEZ1    | 713106 |
| Fasciculation and elongation protein zeta 2 (zygin II)                         | FEZ2    | 708288 |
| FAST kinase domains 1                                                          | FASTKD1 | 706154 |
| Fat storage-inducing transmembrane protein 1                                   | FITM1   | 715085 |
| Fatty acid binding protein 7, brain                                            | FABP7   | 713762 |
| Fatty acyl coa reductase 1                                                     | FAR1    | 699947 |
| F-box and WD repeat domain containing 4                                        | FBXW4   | 711996 |
| F-box and WD repeat domain containing 7                                        | FBXW7   | 695101 |
| F-box protein 11                                                               | FBXO11  | 715651 |
| F-box protein 21                                                               | FBXO21  | 693647 |
| F-box protein 4                                                                | FBXO4   | 697007 |
| F-box protein 44                                                               | FBXO44  | 714585 |
| F-box protein 5                                                                | FBXO5   | 703219 |
| F-box protein 7                                                                | FBXO7   | 717317 |
| FCH and double SH3 domains 2                                                   | FCHSD2  | 717996 |
| Feline leukemia virus subgroup C cellular receptor 1                           | FLVCR1  | 710008 |
| Fem-1 homolog b (C. Elegans)                                                   | FEM1B   | 693955 |
| FERM domain containing 3                                                       | FRMD3   | 713394 |
| Ferritin mitochondrial                                                         | FTMT    | 699743 |
| Fetal and adult testis expressed 1                                             | FATE1   | 704368 |
| Fibrillarin                                                                    | FBL     | 700286 |
| Fibroblast activation protein alpha                                            | FAP     | 701541 |
| Fibroblast growth factor 13                                                    | FGF13   | 695460 |
| Fibroblast growth factor 16                                                    | FGF16   | 705612 |
| Fibroblast growth factor receptor substrate 3                                  | FRS3    | 694462 |
| Fibronectin type III domain containing 3A                                      | FNDC3A  | 705570 |
| Fibronectin type III domain containing 4                                       | FNDC4   | 702098 |
| FIG4 phosphoinositide 5-phosphatase                                            | FIG4    | 699914 |
| Filamin B, beta                                                                | FLNB    | 702732 |
| Filamin binding LIM protein 1                                                  | FBLIM1  | 695727 |
| Finkel-Biskis-Reilly murine sarcoma virus (FBR-musv)<br>ubiquitously expressed | FAU     | 716761 |
| FK506 binding protein 11                                                       | FKBP11  | 708598 |
| FK506 binding protein 7                                                        | FKBP7   | 703299 |

|                                                                    |           |        |
|--------------------------------------------------------------------|-----------|--------|
| FK506 binding protein 8                                            | FKBP8     | 720232 |
| FK506 binding protein 9                                            | FKBP9     | 708827 |
| Flavin adenine dinucleotide synthetase 1                           | FLAD1     | 717133 |
| Flightless I actin binding protein                                 | FLII      | 700471 |
| FLYWCH-type zinc finger 1                                          | FLYWCH1   | 700909 |
| Folate receptor 1 (adult)                                          | FOLR1     | 718388 |
| Follistatin like 1                                                 | FSTL1     | 713367 |
| Formin homology 2 domain containing 1                              | FHOD1     | 697346 |
| Forty-two-three domain containing 1                                | FYTTD1    | 714705 |
| Four and a half LIM domains 2                                      | FHL2      | 713222 |
| Fragile X mental retardation, autosomal homolog 1                  | FXR1      | 710170 |
| FRAS1 related extracellular matrix 1                               | FREM1     | 713874 |
| Frataxin                                                           | FXN       | 699469 |
| Frizzled class receptor 10                                         | FZD10     | 717812 |
| Frizzled class receptor 6                                          | FZD6      | 694625 |
| Fructosamine 3 kinase related protein                              | FN3KRP    | 716431 |
| Ftsj RNA methyltransferase homolog 1 (E. Coli)                     | FTSJ1     | 710243 |
| Fucosyltransferase 10 (alpha (1,3) fucosyltransferase)             | FUT10     | 697659 |
| Fumarylacetoacetate hydrolase (fumarylacetoacetase)                | FAH       | 712716 |
| FUN14 domain containing 1                                          | FUNDC1    | 709370 |
| Fuzzy planar cell polarity protein                                 | FUZ       | 719442 |
| FXYP domain containing ion transport regulator 7                   | FXYP7     | 718457 |
| FYN proto-oncogene, Src family tyrosine kinase                     | FYN       | 574214 |
| FYVE, rhogef and PH domain containing 2                            | FGD2      | 719329 |
| FYVE, rhogef and PH domain containing 6                            | FGD6      | 712132 |
| G elongation factor, mitochondrial 2                               | GFM2      | 704247 |
| G kinase anchoring protein 1                                       | GKAP1     | 708816 |
| G protein pathway suppressor 1                                     | GPS1      | 719343 |
| G protein-coupled bile acid receptor 1                             | GPBAR1    | 697937 |
| G protein-coupled receptor 135                                     | GPR135    | 701843 |
| G protein-coupled receptor 151                                     | GPR151    | 708020 |
| G protein-coupled receptor 31                                      | GPR31     | 717158 |
| G protein-coupled receptor 68                                      | GPR68     | 696529 |
| G protein-coupled receptor 89A                                     | GPR89A    | 696579 |
| G protein-coupled receptor kinase interacting arfgap 2             | GIT2      | 708092 |
| G2/M-phase specific E3 ubiquitin protein ligase                    | G2E3      | 717021 |
| GA binding protein transcription factor, beta subunit 1            | GABPB1    | 715334 |
| GABA(A) receptor-associated protein like 2                         | GABARAPL2 | 714413 |
| Galactosidase alpha                                                | GLA       | 703129 |
| Gametogenetin binding protein 2                                    | GGNBP2    | 713750 |
| Gamma-glutamyl hydrolase (conjugase, folylpolyglutamyldihydrolase) | GGH       | 700747 |
| Gamma-glutamylcyclotransferase                                     | GGCT      | 695547 |
| Gap junction protein alpha 1                                       | GJA1      | 714344 |
| Gastric inhibitory polypeptide                                     | GIP       | 698335 |
| GATA binding protein 2                                             | GATA2     | 705551 |
| GCN1, eif2 alpha kinase activator homolog                          | GCN1      | 698528 |
| GC-rich promoter binding protein 1                                 | GPBP1     | 708322 |

|                                                                       |         |           |
|-----------------------------------------------------------------------|---------|-----------|
| GC-rich promoter binding protein 1-like 1                             | GPBP1L1 | 706690    |
| GDP-mannose 4,6-dehydratase                                           | GMDS    | 707051    |
| GDP-mannose pyrophosphorylase B                                       | GMPPB   | 705454    |
| Geminin, DNA replication inhibitor                                    | GMNN    | 708416    |
| General transcription factor IIA 2                                    | GTF2A2  | 702984    |
| General transcription factor IIB                                      | GTF2B   | 694770    |
| General transcription factor IIE subunit 2                            | GTF2E2  | 694622    |
| General transcription factor IIH subunit 4                            | GTF2H4  | 714285    |
| General transcription factor IIH subunit 5                            | GTF2H5  | 700107    |
| General transcription factor IIIA                                     | GTF3A   | 710492    |
| General transcription factor IIIC subunit 3                           | GTF3C3  | 696338    |
| General transcription factor IIIC subunit 4                           | GTF3C4  | 714849    |
| General transcription factor IIIC subunit 6                           | GTF3C6  | 696512    |
| Geranylgeranyl diphosphate synthase 1                                 | GGPS1   | 100425248 |
| Germ cell-less, spermatogenesis associated 1                          | GMCL1   | 701545    |
| GID complex subunit 8                                                 | GID8    | 698189    |
| GIN5 complex subunit 2 (Psf2 homolog)                                 | GIN52   | 693426    |
| GLE1, RNA export mediator                                             | GLE1    | 717474    |
| GLI family zinc finger 1                                              | GLI1    | 714843    |
| Glucokinase (hexokinase 4) regulator                                  | GCKR    | 701431    |
| Glucose-fructose oxidoreductase domain containing 1                   | GFOD1   | 700607    |
| Glucosidase, beta (bile acid) 2                                       | GBA2    | 696062    |
| Glutamate-cysteine ligase, catalytic subunit                          | GCLC    | 710508    |
| Glutamic-oxaloacetic transaminase 2                                   | GOT2    | 707896    |
| Glutamine--fructose-6-phosphate transaminase 1                        | GFPT1   | 574376    |
| Glutaminyl-trna synthetase                                            | QARS    | 708111    |
| Glutaredoxin 5                                                        | GLRX5   | 702989    |
| Glutathione peroxidase 1                                              | GPX1    | 706732    |
| Glutathione peroxidase 8 (putative)                                   | GPX8    | 705965    |
| Glutathione S-transferase alpha 4                                     | GSTA4   | 709666    |
| Glutathione S-transferase kappa 1                                     | GSTK1   | 704240    |
| Glutathione S-transferase omega 1                                     | GSTO1   | 716078    |
| Glutathione S-transferase omega 2                                     | GSTO2   | 715291    |
| Glutathione S-transferase zeta 1                                      | GSTZ1   | 705723    |
| Glutathione S-transferase, C-terminal domain containing               | GSTCD   | 694220    |
| Glycerol-3-phosphate acyltransferase, mitochondrial                   | GPAM    | 696042    |
| Glycophorin C (Gerbich blood group)                                   | GYPC    | 712092    |
| Glycosylphosphatidylinositol anchor attachment 1                      | GPAA1   | 699887    |
| Glycosyltransferase 8 domain containing 1                             | GLT8D1  | 695999    |
| Glycosyltransferase like domain containing 1                          | GTDC1   | 100424583 |
| Glyoxalase I                                                          | GLO1    | 719518    |
| Golgi reassembly stacking protein 2                                   | GORASP2 | 694170    |
| Golgi SNAP receptor complex member 2                                  | GOSR2   | 716841    |
| Golgi-associated, gamma adaptin ear containing, ARF binding protein 3 | GGA3    | 705751    |
| Golgin A4                                                             | GOLGA4  | 697455    |
| Golgin A7                                                             | GOLGA7  | 709911    |
| Golgin B1                                                             | GOLGB1  | 713993    |



|                                                                             |          |        |
|-----------------------------------------------------------------------------|----------|--------|
| GRAM domain containing 3                                                    | GRAMD3   | 702639 |
| Grancalcin                                                                  | GCA      | 702138 |
| Granulysin                                                                  | GNLY     | 696059 |
| GRB2-related adaptor protein                                                | GRAP     | 702473 |
| Gremlin 2, DAN family BMP antagonist                                        | GREM2    | 708280 |
| G-rich RNA sequence binding factor 1                                        | GRSF1    | 706301 |
| Growth arrest and DNA damage inducible beta                                 | GADD45B  | 711257 |
| Growth arrest and DNA damage inducible gamma                                | GADD45G  | 697835 |
| Growth arrest specific 6                                                    | GAS6     | 716066 |
| Growth differentiation factor 7                                             | GDF7     | 702462 |
| Growth factor receptor bound protein 10                                     | GRB10    | 694786 |
| Growth hormone inducible transmembrane protein                              | GHITM    | 702691 |
| Growth hormone secretagogue receptor                                        | GHSR     | 694587 |
| GRP1 (general receptor for phosphoinositides 1)-associated scaffold protein | GRASP    | 696547 |
| Grpe-like 1, mitochondrial (E. Coli)                                        | GRPEL1   | 709772 |
| Gse1 coiled-coil protein                                                    | GSE1     | 693298 |
| GTP binding protein 4                                                       | GTPBP4   | 709873 |
| Gtpase activating protein (SH3 domain) binding protein 1                    | G3BP1    | 713884 |
| Gtpase, IMAP family member 4                                                | GIMAP4   | 713506 |
| Guanidinoacetate N-methyltransferase                                        | GAMT     | 721263 |
| Guanine nucleotide binding protein (G protein), beta polypeptide 1          | GNB1     | 703399 |
| Guanine nucleotide binding protein (G protein), beta polypeptide 2-like 1   | GNB2L1   | 708526 |
| Guanine nucleotide binding protein (G protein), gamma 10                    | GNG10    | 708193 |
| Guanine nucleotide binding protein (G protein), gamma 11                    | GNG11    | 700606 |
| Guanine nucleotide binding protein-like 2 (nucleolar)                       | GNL2     | 713862 |
| Guanosine monophosphate reductase 2                                         | GMPR2    | 715719 |
| Guanylate kinase 1                                                          | GUK1     | 695272 |
| H2A histone family, member X                                                | H2AFX    | 703073 |
| H2A histone family, member Y                                                | H2AFY    | 711836 |
| H2A histone family, member Y2                                               | H2AFY2   | 711117 |
| H2A histone family, member Z                                                | H2AFZ    | 709326 |
| Haloacid dehalogenase like hydrolase domain containing 2                    | HDHD2    | 697216 |
| Haloacid dehalogenase like hydrolase domain containing 3                    | HDHD3    | 705447 |
| HAUS augmin like complex subunit 8                                          | HAUS8    | 718874 |
| HCLS1 associated protein X-1                                                | HAX1     | 716495 |
| Hdc homolog, cell cycle regulator                                           | HECA     | 702628 |
| Heat shock factor binding protein 1                                         | HSBP1    | 714498 |
| Heat shock protein 90kda alpha (cytosolic), class A member 1                | HSP90AA1 | 708431 |
| Heat shock protein 90kda alpha family class B member 1                      | HSP90AB1 | 702293 |
| Heat shock protein 90kda beta family member 1                               | HSP90B1  | 699568 |
| Heat shock protein family A (Hsp70) member 8                                | HSPA8    | 707989 |
| Heat shock protein family B (small) member 11                               | HSPB11   | 714791 |
| Heat shock protein family B (small) member 6                                | HSPB6    | 710760 |
| Heat shock protein family D (Hsp60) member 1                                | HSPD1    | 698024 |
| Heat shock protein family H (Hsp110) member 1                               | HSPH1    | 721956 |
| Heat shock transcription factor 2                                           | HSF2     | 713938 |

|                                                                                                |           |        |
|------------------------------------------------------------------------------------------------|-----------|--------|
| HECT domain containing E3 ubiquitin protein ligase 1                                           | HECTD1    | 717177 |
| HECT domain containing E3 ubiquitin protein ligase 3                                           | HECTD3    | 705051 |
| Helicase (DNA) B                                                                               | HELB      | 717860 |
| Helicase, lymphoid-specific                                                                    | HELLS     | 701598 |
| Hematological and neurological expressed 1                                                     | HN1       | 664729 |
| Hematopoietic prostaglandin D synthase                                                         | HPGDS     | 705227 |
| Heparan sulfate 6-O-sulfotransferase 2                                                         | HS6ST2    | 706326 |
| Hepatocyte growth factor-regulated tyrosine kinase substrate                                   | HGS       | 714385 |
| Hes family bhlh transcription factor 7                                                         | HES7      | 721942 |
| Hes-related family bhlh transcription factor with YRPW motif 2                                 | HEY2      | 712988 |
| Heterogeneous nuclear ribonucleoprotein A/B                                                    | HNRNPAB   | 702509 |
| Heterogeneous nuclear ribonucleoprotein A1                                                     | HNRNPA1   | 702977 |
| Heterogeneous nuclear ribonucleoprotein A2/B1                                                  | HNRNPA2B1 | 701821 |
| Heterogeneous nuclear ribonucleoprotein C (C1/C2)                                              | HNRNPC    | 706423 |
| Heterogeneous nuclear ribonucleoprotein D                                                      | HNRNPD    | 694867 |
| Heterogeneous nuclear ribonucleoprotein D like                                                 | HNRNPDL   | 694603 |
| Heterogeneous nuclear ribonucleoprotein F                                                      | HNRNPF    | 717668 |
| Heterogeneous nuclear ribonucleoprotein H2 (H')                                                | HNRNPH2   | 703254 |
| Heterogeneous nuclear ribonucleoprotein H3 (2H9)                                               | HNRNPH3   | 694760 |
| Heterogeneous nuclear ribonucleoprotein L                                                      | HNRNPL    | 694448 |
| Heterogeneous nuclear ribonucleoprotein L-like                                                 | HNRNPLL   | 710841 |
| Heterogeneous nuclear ribonucleoprotein R                                                      | HNRNPR    | 718721 |
| Hexamethylene bis-acetamide inducible 1                                                        | HEXIM1    | 716006 |
| Hexamethylene bis-acetamide inducible 2                                                        | HEXIM2    | 716047 |
| Hexokinase 1                                                                                   | HK1       | 711922 |
| High mobility group 20A                                                                        | HMG20A    | 714893 |
| High mobility group box 1                                                                      | HMGB1     | 712849 |
| High mobility group box 3                                                                      | HMGB3     | 703598 |
| High mobility group nucleosomal binding domain 4                                               | HMGN4     | 698039 |
| Hippocalcin                                                                                    | HPCA      | 710249 |
| HIRA interacting protein 3                                                                     | HIRIP3    | 708004 |
| Histidine triad nucleotide binding protein 1                                                   | HINT1     | 706083 |
| Histidine triad nucleotide binding protein 2                                                   | HINT2     | 695521 |
| Histidyl-trna synthetase 2                                                                     | HARS2     | 697009 |
| Histone acetyltransferase 1                                                                    | HAT1      | 695933 |
| Histone cluster 2, h3d                                                                         | HIST2H3D  | 696204 |
| Histone cluster 2, h3d                                                                         | HIST2H3D  | 696204 |
| Histone deacetylase 6                                                                          | HDAC6     | 711363 |
| Histone H4 transcription factor                                                                | HINFP     | 703763 |
| HIV-1 Tat specific factor 1                                                                    | HTATSF1   | 693589 |
| HMG-box transcription factor 1                                                                 | HBP1      | 699237 |
| HNF1 homeobox B                                                                                | HNF1B     | 714540 |
| Holliday junction recognition protein                                                          | HJURP     | 718180 |
| Homeodomain interacting protein kinase 1                                                       | HIPK1     | 707856 |
| Homocysteine-inducible, endoplasmic reticulum stress-inducible, ubiquitin-like domain member 1 | HERPUD1   | 703210 |
| Htra serine peptidase 1                                                                        | HTRA1     | 705855 |
| Hyaluronan and proteoglycan link protein 3                                                     | HAPLN3    | 698880 |

|                                                                                                                  |          |           |
|------------------------------------------------------------------------------------------------------------------|----------|-----------|
| Hyaluronan binding protein 4                                                                                     | HABP4    | 710213    |
| Hyaluronoglucosaminidase 2                                                                                       | HYAL2    | 702484    |
| Hydroxyacyl-coa dehydrogenase                                                                                    | HADH     | 696181    |
| Hydroxyacyl-coa dehydrogenase/3-ketoacyl-coa thiolase/enoyl-coa hydratase (trifunctional protein), alpha subunit | HADHA    | 695975    |
| Hydroxymethylbilane synthase                                                                                     | HMBS     | 702943    |
| Hydroxysteroid (17-beta) dehydrogenase 10                                                                        | HSD17B10 | 700018    |
| Hydroxysteroid (17-beta) dehydrogenase 8                                                                         | HSD17B8  | 718119    |
| Hydroxysteroid dehydrogenase like 2                                                                              | HSDL2    | 707233    |
| Hyperpolarization activated cyclic nucleotide gated potassium channel 3                                          | HCN3     | 717719    |
| Hypocretin (orexin) neuropeptide precursor                                                                       | HCRT     | 709564    |
| Hypoxia up-regulated 1                                                                                           | HYOU1    | 707715    |
| IGF like family receptor 1                                                                                       | IGFLR1   | 710396    |
| IK cytokine, down-regulator of HLA II                                                                            | IK       | 696887    |
| IKAROS family zinc finger 5                                                                                      | IKZF5    | 716950    |
| ILK associated serine/threonine phosphatase                                                                      | ILKAP    | 706334    |
| Immunoglobulin superfamily member 10                                                                             | IGSF10   | 709661    |
| IMP (inosine 5'-monophosphate) dehydrogenase 1                                                                   | IMPDH1   | 701039    |
| IMP (inosine 5'-monophosphate) dehydrogenase 2                                                                   | IMPDH2   | 708307    |
| IMP3, U3 small nucleolar ribonucleoprotein                                                                       | IMP3     | 706202    |
| Importin 8                                                                                                       | IPO8     | 693514    |
| Increased sodium tolerance 1 homolog (yeast)                                                                     | IST1     | 707245    |
| Indoleamine 2,3-dioxygenase 1                                                                                    | IDO1     | 574370    |
| Inhibin alpha                                                                                                    | INHA     | 574379    |
| Inhibitor of DNA binding 1, dominant negative helix-loop-helix protein                                           | ID1      | 713160    |
| Inhibitor of growth family member 1                                                                              | ING1     | 694955    |
| Inhibitor of growth family member 2                                                                              | ING2     | 701839    |
| Inhibitor of growth family member 4                                                                              | ING4     | 722073    |
| Inhibitor of kappa light polypeptide gene enhancer in B-cells, kinase beta                                       | IKBKB    | 704683    |
| INO80 complex subunit C                                                                                          | INO80C   | 708819    |
| Inosine triphosphatase                                                                                           | ITPA     | 717257    |
| Inositol hexakisphosphate kinase 1                                                                               | IP6K1    | 705576    |
| Inositol monophosphatase domain containing 1                                                                     | IMPAD1   | 696893    |
| Inositol polyphosphate multikinase                                                                               | IPMK     | 703630    |
| Inositol polyphosphate-1-phosphatase                                                                             | INPP1    | 703301    |
| Inositol(myo)-1(or 4)-monophosphatase 2                                                                          | IMPA2    | 704320    |
| Insulin induced gene 2                                                                                           | INSIG2   | 693654    |
| Insulin like 3                                                                                                   | INSL3    | 100533194 |
| Insulin like growth factor binding protein 3                                                                     | IGFBP3   | 696868    |
| Insulin like growth factor binding protein 5                                                                     | IGFBP5   | 696339    |
| Insulin like growth factor binding protein 7                                                                     | IGFBP7   | 693564    |
| Insulin-degrading enzyme                                                                                         | IDE      | 698640    |
| Integral membrane protein 2C                                                                                     | ITM2C    | 711245    |
| Integrator complex subunit 10                                                                                    | INTS10   | 705240    |
| Integrator complex subunit 12                                                                                    | INTS12   | 694344    |

|                                                             |        |           |
|-------------------------------------------------------------|--------|-----------|
| Integrator complex subunit 2                                | INTS2  | 712351    |
| Integrator complex subunit 4                                | INTS4  | 699466    |
| Integrator complex subunit 7                                | INTS7  | 711152    |
| Integrator complex subunit 8                                | INTS8  | 700255    |
| Integrin alpha FG-GAP repeat containing 1                   | ITFG1  | 716435    |
| Integrin linked kinase                                      | ILK    | 709944    |
| Integrin subunit alpha 4                                    | ITGA4  | 704745    |
| Integrin subunit alpha V                                    | ITGAV  | 707756    |
| Integrin subunit beta 6                                     | ITGB6  | 700454    |
| Integrin subunit beta 7                                     | ITGB7  | 699405    |
| Interferon gamma receptor 1                                 | IFNGR1 | 100423877 |
| Interferon induced protein with tetratricopeptide repeats 2 | IFIT2  | 695452    |
| Interferon induced, with helicase C domain 1                | IFIH1  | 702024    |
| Interferon regulatory factor 2                              | IRF2   | 694347    |
| Interferon, lambda receptor 1                               | IFNLR1 | 711625    |
| Interferon-related developmental regulator 2                | IFRD2  | 702959    |
| Interleukin 17 receptor A                                   | IL17RA | 709005    |
| Interleukin 20 receptor subunit beta                        | IL20RB | 716769    |
| Interleukin enhancer binding factor 3                       | ILF3   | 713427    |
| Intraflagellar transport 20                                 | IFT20  | 715773    |
| Intraflagellar transport 22                                 | IFT22  | 714551    |
| Intraflagellar transport 27                                 | IFT27  | 697032    |
| Intraflagellar transport 46                                 | IFT46  | 700582    |
| Intraflagellar transport 57                                 | IFT57  | 705088    |
| Intraflagellar transport 74                                 | IFT74  | 707561    |
| Intraflagellar transport 80                                 | IFT80  | 705146    |
| Intraflagellar transport 81                                 | IFT81  | 710434    |
| IQ motif and Sec7 domain 1                                  | IQSEC1 | 693922    |
| IQ motif containing B1                                      | IQCB1  | 715032    |
| IQ motif containing K                                       | IQCK   | 695417    |
| IQ motif containing with AAA domain 1                       | IQCA1  | 694173    |
| Iron-sulfur cluster assembly 2                              | ISCA2  | 700004    |
| Iron-sulfur cluster assembly enzyme                         | ISCU   | 705669    |
| Iroquois homeobox 6                                         | IRX6   | 698232    |
| Isocitrate dehydrogenase 3 (NAD+) alpha                     | IDH3A  | 677715    |
| Isocitrate dehydrogenase 3 (NAD+) gamma                     | IDH3G  | 698558    |
| Isoleucyl-trna synthetase                                   | IARS   | 677705    |
| IWS1 homolog (S. Cerevisiae)                                | IWS1   | 699205    |
| Izumo sperm-egg fusion 1                                    | IZUMO1 | 718234    |
| Jagunal homolog 1                                           | JAGN1  | 699718    |
| JNK1/MAPK8-associated membrane protein                      | JKAMP  | 702307    |
| Jumonji domain containing 1C                                | JMJD1C | 697630    |
| Kallikrein related peptidase 8                              | KLK8   | 719488    |
| Karyopherin alpha 4 (importin alpha 3)                      | KPNA4  | 702486    |
| KDEL endoplasmic reticulum protein retention receptor 2     | KDELR2 | 704335    |
| KDEL endoplasmic reticulum protein retention receptor 3     | KDELR3 | 700810    |
| KDEL motif containing 1                                     | KDELC1 | 702156    |
| Kelch domain containing 4                                   | KLHDC4 | 695768    |

|                                                             |           |           |
|-------------------------------------------------------------|-----------|-----------|
| Kelch domain containing 9                                   | KLHDC9    | 719863    |
| Kelch like family member 2                                  | KLHL2     | 704790    |
| Kelch like family member 21                                 | KLHL21    | 704734    |
| Kelch like family member 3                                  | KLHL3     | 713123    |
| Kelch like family member 32                                 | KLHL32    | 709276    |
| Kelch like family member 5                                  | KLHL5     | 698740    |
| Kelch repeat and BTB (POZ) domain containing 4              | KBTBD4    | 711452    |
| Keratin associated protein 12-4                             | KRTAP12-4 | 712284    |
| Keratin associated protein 19-3                             | KRTAP19-3 | 703677    |
| Keratinocyte differentiation factor 1                       | KDF1      | 715312    |
| KIAA0040 ortholog                                           | KIAA0040  | 100423509 |
| KIAA0226-like ortholog                                      | KIAA0226L | 703875    |
| KIAA0355 ortholog                                           | KIAA0355  | 705202    |
| KIAA0556 ortholog                                           | KIAA0556  | 706125    |
| KIAA0907 ortholog                                           | KIAA0907  | 718005    |
| KIAA0922 ortholog                                           | KIAA0922  | 696761    |
| KIAA1024 ortholog                                           | KIAA1024  | 712078    |
| KIAA1033 ortholog                                           | KIAA1033  | 701501    |
| KIAA1143 ortholog                                           | KIAA1143  | 714979    |
| KIAA1958 ortholog                                           | KIAA1958  | 707028    |
| KIAA2013 ortholog                                           | KIAA2013  | 722762    |
| Killer cell lectin-like receptor subfamily F, member 1      | KLRF1     | 574389    |
| Kin17 DNA and RNA binding protein                           | KIN       | 713634    |
| Kinase D-interacting substrate 220kda                       | KIDINS220 | 693522    |
| Kinesin family member 1C                                    | KIF1C     | 721601    |
| Kinesin family member 2C                                    | KIF2C     | 705381    |
| Kinesin family member C3                                    | KIFC3     | 705951    |
| Kinesin heavy chain member 2A                               | KIF2A     | 696561    |
| Kinesin light chain 4                                       | KLC4      | 698356    |
| Kininogen 1                                                 | KNG1      | 707466    |
| Kizuna centrosomal protein                                  | KIZ       | 700808    |
| KN motif and ankyrin repeat domains 1                       | KANK1     | 697569    |
| KN motif and ankyrin repeat domains 3                       | KANK3     | 711290    |
| Kruppel-like factor 10                                      | KLF10     | 693458    |
| Kruppel-like factor 11                                      | KLF11     | 702323    |
| KTI12 chromatin associated homolog                          | KTI12     | 712824    |
| Kxd1 motif containing 1                                     | KXD1      | 720235    |
| L-2-hydroxyglutarate dehydrogenase                          | L2HGDH    | 705721    |
| La ribonucleoprotein domain family member 7                 | LARP7     | 703731    |
| Lactate dehydrogenase B                                     | LDHB      | 706110    |
| Lamin B receptor                                            | LBR       | 700801    |
| Laminin subunit gamma 2                                     | LAMC2     | 715212    |
| Late cornified envelope 4A                                  | LCE4A     | 100423933 |
| Late endosomal/lysosomal adaptor, MAPK and MTOR activator 1 | LAMTOR1   | 718249    |
| Late endosomal/lysosomal adaptor, MAPK and MTOR activator 2 | LAMTOR2   | 718110    |
| Late endosomal/lysosomal adaptor, MAPK and MTOR activator 3 | LAMTOR3   | 709133    |
| Latexin                                                     | LXN       | 703996    |
| LCK proto-oncogene, Src family tyrosine kinase              | LCK       | 717704    |

|                                                                                             |         |           |
|---------------------------------------------------------------------------------------------|---------|-----------|
| LDL receptor related protein 1                                                              | LRP1    | 710965    |
| LDL receptor related protein 10                                                             | LRP10   | 712506    |
| LDL receptor related protein associated protein 1                                           | LRPAP1  | 699677    |
| Lectin, galactoside-binding, soluble, 14                                                    | LGALS14 | 698227    |
| Lectin, mannose-binding, 1                                                                  | LMAN1   | 697449    |
| LETM1 domain containing 1                                                                   | LETMD1  | 694422    |
| Leucine carboxyl methyltransferase 1                                                        | LCMT1   | 702050    |
| Leucine rich repeat and coiled-coil centrosomal protein 1                                   | LRRCC1  | 707964    |
| Leucine rich repeat containing 1                                                            | LRRC1   | 710867    |
| Leucine rich repeat containing 14                                                           | LRRC14  | 703587    |
| Leucine rich repeat containing 17                                                           | LRRC17  | 695422    |
| Leucine rich repeat containing 20                                                           | LRRC20  | 710594    |
| Leucine rich repeat containing 40                                                           | LRRC40  | 702565    |
| Leucine rich repeat containing 42                                                           | LRRC42  | 714839    |
| Leucine rich repeat protein 1                                                               | LRR1    | 706658    |
| Leucine zipper, down-regulated in cancer 1                                                  | LDOC1   | 696902    |
| Leucine zipper, down-regulated in cancer 1-like                                             | LDOC1L  | 712760    |
| Leucine-rich repeat containing 8 family member D                                            | LRRC8D  | 100423127 |
| Leucine-rich repeat LGI family member 4                                                     | LGI4    | 718426    |
| Leucine-rich repeats and WD repeat domain containing 1                                      | LRWD1   | 715187    |
| Leukocyte immunoglobulin-like receptor, subfamily B<br>(with TM and ITIM domains), member 1 | LILRB1  | 692340    |
| Leukocyte receptor cluster (LRC) member 1                                                   | LENG1   | 693417    |
| Leukocyte-associated immunoglobulin-like receptor 1                                         | LAIR1   | 695533    |
| Leupaxin                                                                                    | LPXN    | 702033    |
| Ligand dependent nuclear receptor interacting factor 1                                      | LRIF1   | 702445    |
| Ligase III, DNA, ATP-dependent                                                              | LIG3    | 715181    |
| Ligase III, DNA, ATP-dependent                                                              | LIG3    | 715181    |
| LIM and cysteine-rich domains 1                                                             | LMCD1   | 702382    |
| LIM domain containing 2                                                                     | LIMD2   | 717889    |
| Limb bud and heart development                                                              | LBH     | 704749    |
| Lin-9 DREAM muvb core complex component                                                     | LIN9    | 699056    |
| Lipase A, lysosomal acid, cholesterol esterase                                              | LIPA    | 695240    |
| Lipid droplet associated hydrolase                                                          | LDAH    | 717510    |
| Lipocalin 1                                                                                 | LCN1    | 711974    |
| Lipocalin 2                                                                                 | LCN2    | 697208    |
| Lipocalin 6                                                                                 | LCN6    | 574148    |
| Lipoma HMGIC fusion partner-like 4                                                          | LHFPL4  | 700973    |
| Lipoyltransferase 1                                                                         | LIPT1   | 708812    |
| Lipoyltransferase 1                                                                         | LIPT1   | 708812    |
| LSM10, U7 small nuclear RNA associated                                                      | LSM10   | 713277    |
| LSM12 homolog                                                                               | LSM12   | 714219    |
| LSM14A mrna processing body assembly factor                                                 | LSM14A  | 705085    |
| LSM4 homolog, U6 small nuclear RNA and mrna<br>degradation associated                       | LSM4    | 720192    |
| LSM6 homolog, U6 small nuclear RNA and mrna<br>degradation associated                       | LSM6    | 703226    |
| LUC7-like 3 pre-mrna splicing factor                                                        | LUC7L3  | 703662    |

|                                                                                         |          |           |
|-----------------------------------------------------------------------------------------|----------|-----------|
| Lymphocyte antigen 6 complex, locus G6C                                                 | LY6G6C   | 716220    |
| Lymphoid enhancer-binding factor 1                                                      | LEF1     | 695776    |
| Lymphotoxin alpha                                                                       | LTA      | 715425    |
| Lysine (K)-specific demethylase 1A                                                      | KDM1A    | 718609    |
| Lysine (K)-specific methyltransferase 5B                                                | KMT5B    | 710481    |
| Lysine-rich nucleolar protein 1                                                         | KNOP1    | 695144    |
| Lysophosphatidic acid receptor 6                                                        | LPAR6    | 705081    |
| Lysosomal protein transmembrane 4 alpha                                                 | LAPTM4A  | 701298    |
| Lysyl oxidase like 3                                                                    | LOXL3    | 709834    |
| Lysyl-trna synthetase                                                                   | KARS     | 714516    |
| Mab-21 domain containing 2                                                              | MB21D2   | 706284    |
| MACRO domain containing 1                                                               | MACROD1  | 717961    |
| Macrophage erythroblast attacher                                                        | MAEA     | 702015    |
| MAD2L1 binding protein                                                                  | MAD2L1BP | 701099    |
| MAGE family member D1                                                                   | MAGED1   | 696658    |
| MAGE family member F1                                                                   | MAGEF1   | 701676    |
| MAGE family member H1                                                                   | MAGEH1   | 703812    |
| Major facilitator superfamily domain containing 14B                                     | MFSD14B  | 708498    |
| Major facilitator superfamily domain containing 5                                       | MFSD5    | 702021    |
| Major histocompatibility complex, class II, DM beta                                     | MAMU-DMB | 100429857 |
| MAK16 homolog                                                                           | MAK16    | 696648    |
| Makorin ring finger protein 1                                                           | MKRN1    | 716752    |
| Malate dehydrogenase 1                                                                  | MDH1     | 694703    |
| Male-enhanced antigen 1                                                                 | MEA1     | 699300    |
| Male-specific lethal 3 homolog (Drosophila)                                             | MSL3     | 720836    |
| Malonyl-coa-acyl carrier protein transacylase                                           | MCAT     | 711556    |
| Mannose phosphate isomerase                                                             | MPI      | 722129    |
| Mannose-P-dolichol utilization defect 1                                                 | MPDU1    | 715962    |
| Mannosidase, alpha, class 2B, member 1                                                  | MAN2B1   | 716173    |
| Mannosyl (alpha-1,3-)-glycoprotein beta-1,4-N-acetylglucosaminyl transferase, isozyme B | MGAT4B   | 705006    |
| Mannosyl (alpha-1,6-)-glycoprotein beta-1,2-N-acetylglucosaminyl transferase            | MGAT2    | 706426    |
| Mannosyl-oligosaccharide glucosidase                                                    | MOGS     | 708913    |
| MANSC domain containing 1                                                               | MANSC1   | 696667    |
| MAP kinase interacting serine/threonine kinase 1                                        | MKNK1    | 710061    |
| MARCKS-like 1                                                                           | MARCKSL1 | 100428619 |
| Mastermind like transcriptional coactivator 1                                           | MAML1    | 715047    |
| Matrin 3                                                                                | MATR3    | 100568450 |
| Mckusick-Kaufman syndrome                                                               | MKKS     | 718547    |
| Mdm1 nuclear protein                                                                    | MDM1     | 718062    |
| MDM2 binding protein                                                                    | MTBP     | 703121    |
| Mediator complex subunit 11                                                             | MED11    | 709561    |
| Mediator complex subunit 13-like                                                        | MED13L   | 713867    |
| Mediator complex subunit 19                                                             | MED19    | 704421    |
| Mediator complex subunit 21                                                             | MED21    | 710699    |
| Mediator complex subunit 23                                                             | MED23    | 714629    |
| Mediator complex subunit 6                                                              | MED6     | 693320    |

|                                                                                                                                               |          |           |
|-----------------------------------------------------------------------------------------------------------------------------------------------|----------|-----------|
| Mediator complex subunit 8                                                                                                                    | MED8     | 700676    |
| Meiosis 1 associated protein                                                                                                                  | M1AP     | 710210    |
| Meiosis specific nuclear structural 1                                                                                                         | MNS1     | 699377    |
| Membrane frizzled-related protein                                                                                                             | MFRP     | 704965    |
| Membrane protein, palmitoylated 1                                                                                                             | MPP1     | 702092    |
| Meningioma expressed antigen 5 (hyaluronidase)                                                                                                | MGEA5    | 712370    |
| Mercaptopyruvate sulfurtransferase                                                                                                            | MPST     | 695842    |
| Mesoderm development candidate 1                                                                                                              | MESDC1   | 713059    |
| Mesoderm induction early response 1, family member 2                                                                                          | MIER2    | 701450    |
| Mesoderm specific transcript                                                                                                                  | MEST     | 703327    |
| MET proto-oncogene, receptor tyrosine kinase                                                                                                  | MET      | 704562    |
| Metadherin                                                                                                                                    | MTDH     | 702410    |
| Metal response element binding transcription factor 2                                                                                         | MTF2     | 707104    |
| Metallo-beta-lactamase domain containing 2                                                                                                    | MBLAC2   | 695437    |
| Metastasis associated 1 family member 2                                                                                                       | MTA2     | 718772    |
| Metastasis associated 1 family member 3                                                                                                       | MTA3     | 712967    |
| Metaxin 1                                                                                                                                     | MTX1     | 717595    |
| Methionine sulfoxide reductase A                                                                                                              | MSRA     | 698628    |
| Methionine sulfoxide reductase B1                                                                                                             | MSRB1    | 693358    |
| Methionine sulfoxide reductase B3                                                                                                             | MSRB3    | 717617    |
| Methionyl aminopeptidase 1                                                                                                                    | METAP1   | 710537    |
| Methionyl-trna synthetase                                                                                                                     | MARS     | 714744    |
| Methyl-cpg binding domain 4 DNA glycosylase                                                                                                   | MBD4     | 720557    |
| Methylcrotonoyl-coa carboxylase 1                                                                                                             | MCCC1    | 708258    |
| Methylenetetrahydrofolate dehydrogenase (NADP+ dependent) 1,<br>methenyltetrahydrofolate cyclohydrolase, formyltetrahydrofolate<br>synthetase | MTHFD1   | 707059    |
| Methylmalonic aciduria (cobalamin deficiency) cblb type                                                                                       | MMAB     | 708973    |
| Methyltransferase like 1                                                                                                                      | METTL1   | 715796    |
| Methyltransferase like 13                                                                                                                     | METTL13  | 704943    |
| Methyltransferase like 18                                                                                                                     | METTL18  | 701890    |
| Methyltransferase like 3                                                                                                                      | METTL3   | 706852    |
| Mevalonate kinase                                                                                                                             | MVK      | 707645    |
| Mex-3 RNA binding family member B                                                                                                             | MEX3B    | 713441    |
| Microfibrillar associated protein 1                                                                                                           | MFAP1    | 711111    |
| Microfibrillar associated protein 3 like                                                                                                      | MFAP3L   | 694985    |
| Microsomal glutathione S-transferase 1                                                                                                        | MGST1    | 701652    |
| Microsomal glutathione S-transferase 1                                                                                                        | MGST1    | 701652    |
| Microsomal glutathione S-transferase 2                                                                                                        | MGST2    | 697983    |
| Microtubule associated protein 1 light chain 3 alpha                                                                                          | MAP1LC3A | 707439    |
| Microtubule associated protein 1S                                                                                                             | MAP1S    | 719196    |
| Microtubule associated protein 4                                                                                                              | MAP4     | 100423619 |
| Microtubule associated protein RP/EB family member 1                                                                                          | MAPRE1   | 711404    |
| Midline 1                                                                                                                                     | MID1     | 709683    |
| MIF4G domain containing                                                                                                                       | MIF4GD   | 706005    |
| Minichromosome maintenance complex component 3                                                                                                | MCM3     | 708320    |
| Minichromosome maintenance complex component 3 associated<br>protein                                                                          | MCM3AP   | 721810    |



|                                                     |          |           |
|-----------------------------------------------------|----------|-----------|
| Minichromosome maintenance complex component 5      | MCM5     | 717548    |
| MIS12 kinetochore complex component                 | MIS12    | 712202    |
| Mitochondrial assembly of ribosomal large subunit 1 | MALSU1   | 704884    |
| Mitochondrial carrier 1                             | MTCH1    | 719313    |
| Mitochondrial E3 ubiquitin protein ligase 1         | MUL1     | 705429    |
| Mitochondrial fission regulator 1                   | MTFR1    | 711143    |
| Mitochondrial fission regulator 1-like              | MTFR1L   | 713213    |
| Mitochondrial genome maintenance exonuclease 1      | MGME1    | 696467    |
| Mitochondrial intermediate peptidase                | MIPEP    | 707131    |
| Mitochondrial nucleoid factor 1                     | C6orf125 | 100425666 |
| Mitochondrial poly(A) polymerase                    | MTPAP    | 694491    |
| Mitochondrial pyruvate carrier 1                    | MPC1     | 716864    |
| Mitochondrial ribosomal protein L11                 | MRPL11   | 714094    |
| Mitochondrial ribosomal protein L13                 | MRPL13   | 702994    |
| Mitochondrial ribosomal protein L16                 | MRPL16   | 698831    |
| Mitochondrial ribosomal protein L18                 | MRPL18   | 702629    |
| Mitochondrial ribosomal protein L19                 | MRPL19   | 711081    |
| Mitochondrial ribosomal protein L20                 | MRPL20   | 701533    |
| Mitochondrial ribosomal protein L22                 | MRPL22   | 714920    |
| Mitochondrial ribosomal protein L24                 | MRPL24   | 718640    |
| Mitochondrial ribosomal protein L28                 | MRPL28   | 695310    |
| Mitochondrial ribosomal protein L36                 | MRPL36   | 100430880 |
| Mitochondrial ribosomal protein L39                 | MRPL39   | 708631    |
| Mitochondrial ribosomal protein L41                 | MRPL41   | 702768    |
| Mitochondrial ribosomal protein L42                 | MRPL42   | 715676    |
| Mitochondrial ribosomal protein L46                 | MRPL46   | 697872    |
| Mitochondrial ribosomal protein L47                 | MRPL47   | 709030    |
| Mitochondrial ribosomal protein L48                 | MRPL48   | 718240    |
| Mitochondrial ribosomal protein L50                 | MRPL50   | 713923    |
| Mitochondrial ribosomal protein L51                 | MRPL51   | 713036    |
| Mitochondrial ribosomal protein L55                 | MRPL55   | 695962    |
| Mitochondrial ribosomal protein L9                  | MRPL9    | 711235    |
| Mitochondrial ribosomal protein S11                 | MRPS11   | 697743    |
| Mitochondrial ribosomal protein S17                 | MRPS17   | 703678    |
| Mitochondrial ribosomal protein S21                 | MRPS21   | 706805    |
| Mitochondrial ribosomal protein S22                 | MRPS22   | 715845    |
| Mitochondrial ribosomal protein S23                 | MRPS23   | 708818    |
| Mitochondrial ribosomal protein S28                 | MRPS28   | 699755    |
| Mitochondrial ribosomal protein S33                 | MRPS33   | 693681    |
| Mitochondrial ribosomal protein S6                  | MRPS6    | 106997260 |
| Mitochondrial ribosomal protein S7                  | MRPS7    | 701800    |
| Mitochondrial ribosomal protein S9                  | MRPS9    | 712968    |
| Mitochondrial transcription termination factor 2    | MTERF2   | 703925    |
| Mitochondrial transcription termination factor 3    | MTERF3   | 701366    |
| Mitochondrial translational initiation factor 2     | MTIF2    | 717042    |
| Mitochondrial translational initiation factor 3     | MTIF3    | 710571    |
| Mitochondrial trna translation optimization 1       | MTO1     | 717688    |
| Mitogen-activated protein kinase 1                  | MAPK1    | 698569    |

|                                                                |          |           |
|----------------------------------------------------------------|----------|-----------|
| Mitogen-activated protein kinase 7                             | MAPK7    | 702837    |
| Mitogen-activated protein kinase associated protein 1          | MAPKAP1  | 702599    |
| Mitogen-activated protein kinase kinase 1                      | MAP2K1   | 710415    |
| Mitogen-activated protein kinase kinase 4                      | MAP2K4   | 718155    |
| Mitogen-activated protein kinase kinase 5                      | MAP2K5   | 711672    |
| Mitogen-activated protein kinase kinase 5                      | MAP2K5   | 711672    |
| Mitogen-activated protein kinase kinase kinase 14              | MAP3K14  | 716258    |
| Mitogen-activated protein kinase kinase kinase 3               | MAP3K3   | 717866    |
| Mitogen-activated protein kinase kinase kinase 4               | MAP3K4   | 710360    |
| Mitogen-activated protein kinase kinase kinase 6               | MAP3K6   | 715911    |
| Mitogen-activated protein kinase kinase kinase 9               | MAP3K9   | 693835    |
| Mitogen-activated protein kinase kinase kinase kinase 1        | MAP4K1   | 694259    |
| Mitogen-activated protein kinase kinase kinase kinase 5        | MAP4K5   | 706204    |
| Mitogen-activated protein kinase-activated protein kinase 2    | MAPKAPK2 | 695044    |
| Mitogen-activated protein kinase-activated protein kinase 3    | MAPKAPK3 | 701320    |
| Mitogen-activated protein kinase-activated protein kinase 5    | MAPKAPK5 | 713521    |
| Mitotic spindle organizing protein 2B                          | MZT2B    | 701787    |
| MNAT CDK-activating kinase assembly factor 1                   | MNAT1    | 703905    |
| Molybdenum cofactor synthesis 2                                | MOCS2    | 703689    |
| MON1 homolog B, secretory trafficking associated               | MON1B    | 715104    |
| Monoacylglycerol O-acyltransferase 1                           | MOGAT1   | 705924    |
| Monoamine oxidase B                                            | MAOB     | 708468    |
| Monocyte to macrophage differentiation-associated              | MMD      | 706723    |
| MORC family CW-type zinc finger 4                              | MORC4    | 701136    |
| Morf4 family associated protein 1                              | MRFAP1   | 710771    |
| Morf4 family associated protein 1-like 1                       | MRFAP1L1 | 710411    |
| MORN repeat containing 2                                       | MORN2    | 106992909 |
| Mortality factor 4 like 1                                      | MORF4L1  | 711357    |
| Motilin                                                        | MLN      | 574099    |
| Mov10 RISC complex RNA helicase                                | MOV10    | 705910    |
| M-phase phosphoprotein 6                                       | MPHOSPH6 | 714335    |
| M-phase specific PLK1 interacting protein                      | MPLKIP   | 703092    |
| MRT4 homolog, ribosome maturation factor                       | MRTO4    | 702926    |
| Msh homeobox 2                                                 | MSX2     | 694227    |
| MUS81 structure-specific endonuclease subunit                  | MUS81    | 715558    |
| Muscleblind like splicing regulator 1                          | MBNL1    | 708735    |
| Mutl homolog 1                                                 | MLH1     | 698782    |
| Muty DNA glycosylase                                           | MUTYH    | 705651    |
| Myb/SANT-like DNA-binding domain containing 2                  | MSANTD2  | 712347    |
| MYC associated factor X                                        | MAX      | 708228    |
| Myelin protein zero-like 2                                     | MPZL2    | 699330    |
| Myeloid cell leukemia 1                                        | MCL1     | 707539    |
| Myeloid/lymphoid or mixed-lineage leukemia; translocated to, 6 | MLLT6    | 694045    |
| Myocyte enhancer factor 2C                                     | MEF2C    | 694992    |
| Myoferlin                                                      | MYOF     | 700922    |
| Myomesin 1                                                     | MYOM1    | 695301    |
| Myoneurin                                                      | MYNN     | 698094    |
| Myosin IF                                                      | MYO1F    | 712101    |

|                                                            |         |         |
|------------------------------------------------------------|---------|---------|
| Myosin light chain 4                                       | MYL4    | 717354  |
| Myosin light chain kinase 3                                | MYLK3   | 716132  |
| Myosin X                                                   | MYO10   | 718002  |
| Myosin, light chain 12A, regulatory, non-sarcomeric        | MYL12A  | 695077  |
| Myosin, light chain 12A, regulatory, non-sarcomeric        | MYL12A  | 695077  |
| Myotrophin                                                 | MTPN    | 708941  |
| Myotubularin 1                                             | MTM1    | 703131  |
| Myotubularin related protein 2                             | MTMR2   | 699703  |
| Myotubularin related protein 4                             | MTMR4   | 714621  |
| Myotubularin related protein 6                             | MTMR6   | 709118  |
| Myotubularin related protein 8                             | MTMR8   | 708037  |
| Myristoylated alanine-rich protein kinase C substrate      | MARCKS  | 694077  |
| MYST/Esa1-associated factor 6                              | MEAF6   | 713666  |
| N(alpha)-acetyltransferase 35, natc auxiliary subunit      | NAA35   | 710122  |
| N(alpha)-acetyltransferase 50, nate catalytic subunit      | NAA50   | 709764  |
| N(alpha)-acetyltransferase 60, natf catalytic subunit      | NAA60   | 703207  |
| N-acetylglucosamine kinase                                 | NAGK    | 703976  |
| N-acetylglucosamine-1-phosphate transferase, gamma subunit | GNPTG   | 722441  |
| NAD(P) dependent steroid dehydrogenase-like                | NSDHL   | 693333  |
| NAD(P)H dehydrogenase, quinone 2                           | NQO2    | 707675  |
| NADH dehydrogenase subunit 1                               | ND1     | 2846627 |
| NADH dehydrogenase subunit 1                               | ND1     | 2846627 |
| NADH:ubiquinone oxidoreductase complex assembly factor 1   | NDUFAF1 | 710275  |
| NADH:ubiquinone oxidoreductase complex assembly factor 2   | NDUFAF2 | 693441  |
| NADH:ubiquinone oxidoreductase complex assembly factor 4   | NDUFAF4 | 705102  |
| NADH:ubiquinone oxidoreductase complex assembly factor 6   | NDUFAF6 | 700515  |
| NADH:ubiquinone oxidoreductase complex assembly factor 7   | NDUFAF7 | 709473  |
| NADH:ubiquinone oxidoreductase core subunit S2             | NDUFS2  | 719935  |
| NADH:ubiquinone oxidoreductase core subunit S3             | NDUFS3  | 713040  |
| NADH:ubiquinone oxidoreductase subunit A1                  | NDUFA1  | 694635  |
| NADH:ubiquinone oxidoreductase subunit A12                 | NDUFA12 | 711970  |
| NADH:ubiquinone oxidoreductase subunit A8                  | NDUFA8  | 698706  |
| NADH:ubiquinone oxidoreductase subunit AB1                 | NDUFAB1 | 700718  |
| NADH:ubiquinone oxidoreductase subunit B10                 | NDUFB10 | 693482  |
| NADH:ubiquinone oxidoreductase subunit B2                  | NDUFB2  | 693431  |
| NADH:ubiquinone oxidoreductase subunit B4                  | NDUFB4  | 713428  |
| NADH:ubiquinone oxidoreductase subunit B8                  | NDUFB8  | 710521  |
| NADH:ubiquinone oxidoreductase subunit B9                  | NDUFB9  | 711387  |
| NADH:ubiquinone oxidoreductase subunit C1                  | NDUFC1  | 697242  |
| NADH:ubiquinone oxidoreductase subunit S4                  | NDUFS4  | 704137  |
| NADH:ubiquinone oxidoreductase subunit S6                  | NDUFS6  | 709426  |
| Nascent polypeptide-associated complex alpha subunit       | NACA    | 713416  |
| Natural killer cell granule protein 7                      | NKG7    | 719624  |
| NCK adaptor protein 2                                      | NCK2    | 713287  |
| NCK interacting protein with SH3 domain                    | NCKIPSD | 709410  |
| NCK-associated protein 1                                   | NCKAP1  | 711124  |
| NECAP endocytosis associated 2                             | NECAP2  | 698687  |
| NEDD4 binding protein 2                                    | N4BP2   | 700365  |

|                                                                   |         |           |
|-------------------------------------------------------------------|---------|-----------|
| NEDD8 activating enzyme E1 subunit 1                              | NAE1    | 696429    |
| Negative elongation factor complex member C/D                     | NELFCD  | 696053    |
| Negative elongation factor complex member E                       | NELFE   | 716913    |
| Negative regulator of ubiquitin-like proteins 1                   | NUB1    | 715231    |
| Nerve growth factor receptor (TNFRSF16) associated protein 1      | NGFRAP1 | 103266060 |
| Neugrin, neurite outgrowth associated                             | NGRN    | 702187    |
| Neural precursor cell expressed, developmentally down-regulated 1 | NEDD1   | 713673    |
| Neural precursor cell expressed, developmentally down-regulated 8 | NEDD8   | 715763    |
| Neural precursor cell expressed, developmentally down-regulated 9 | NEDD9   | 699359    |
| Neurexophilin and PC-esterase domain family member 3              | NXPE3   | 702612    |
| Neurologin 2                                                      | NLGN2   | 574368    |
| Neuronal PAS domain protein 2                                     | NPAS2   | 710480    |
| Neuronal pentraxin I                                              | NPTX1   | 718259    |
| Neuron-derived neurotrophic factor                                | NDNF    | 706304    |
| Neuropeptide FF-amide peptide precursor                           | NPFF    | 703412    |
| Neuropilin 1                                                      | NRP1    | 697755    |
| Neuroplastin                                                      | NPTN    | 699627    |
| NFKB activating protein                                           | NKAP    | 694891    |
| NGFI-A binding protein 1                                          | NAB1    | 693274    |
| NGFI-A binding protein 2 (EGR1 binding protein 2)                 | NAB2    | 714209    |
| N-glycanase 1                                                     | NGLY1   | 700842    |
| NHL repeat containing 2                                           | NHLRC2  | 698009    |
| NHP2 ribonucleoprotein                                            | NHP2    | 701950    |
| Nicotinamide nucleotide transhydrogenase                          | NNT     | 701110    |
| Niemann-Pick disease, type C2                                     | NPC2    | 699881    |
| NIMA-related kinase 1                                             | NEK1    | 694345    |
| NIN1/RPN12 binding protein 1 homolog                              | NOB1    | 705344    |
| Ninein                                                            | NIN     | 709532    |
| Ninjurin 1                                                        | NINJ1   | 717218    |
| Nitric oxide associated 1                                         | NOA1    | 693437    |
| NLR family member X1                                              | NLRX1   | 703981    |
| NLR family member X1                                              | NLRX1   | 703981    |
| NMD3 ribosome export adaptor                                      | NMD3    | 701677    |
| NME/NM23 nucleoside diphosphate kinase 2                          | NME2    | 100533957 |
| N-myc and STAT interactor                                         | NMI     | 694554    |
| Non-POU domain containing, octamer-binding                        | NONO    | 697263    |
| Non-SMC condensin II complex subunit D3                           | NCAPD3  | 700276    |
| Non-SMC condensin II complex subunit H2                           | NCAPH2  | 716120    |
| NOP16 nucleolar protein                                           | NOP16   | 696768    |
| NOP2/Sun RNA methyltransferase family member 5                    | NSUN5   | 716219    |
| NOP58 ribonucleoprotein                                           | NOP58   | 703859    |
| NOP9 nucleolar protein                                            | NOP9    | 715969    |
| NPR2-like, GATOR1 complex subunit                                 | NPRL2   | 701924    |
| NRDE-2, necessary for RNA interference, domain containing         | NRDE2   | 695676    |
| NSA2, ribosome biogenesis homolog                                 | NSA2    | 704670    |
| NSE1 homolog, SMC5-SMC6 complex component                         | NSMCE1  | 703436    |
| NSE3 homolog, SMC5-SMC6 complex component                         | NSMCE3  | 712714    |
| NSE4 homolog A, SMC5-SMC6 complex component                       | NSMCE4A | 705375    |

|                                                                           |        |        |
|---------------------------------------------------------------------------|--------|--------|
| NSFL1 (p97) cofactor (p47)                                                | NSFL1C | 715743 |
| NSL1, MIS12 kinetochore complex component                                 | NSL1   | 710371 |
| N-terminal Xaa-Pro-Lys N-methyltransferase 1                              | NTMT1  | 716763 |
| Nth-like DNA glycosylase 1                                                | NTHL1  | 694848 |
| Nuclear casein kinase and cyclin-dependent kinase substrate 1             | NUCKS1 | 697298 |
| Nuclear envelope integral membrane protein 1                              | NEMP1  | 710700 |
| Nuclear factor of activated T-cells, cytoplasmic, calcineurin-dependent 3 | NFATC3 | 702390 |
| Nuclear factor of kappa light polypeptide gene enhancer in B-cells 1      | NFKB1  | 710324 |
| Nuclear factor, erythroid 2 like 1                                        | NFE2L1 | 695404 |
| Nuclear factor, erythroid 2 like 2                                        | NFE2L2 | 707606 |
| Nuclear fragile X mental retardation protein interacting protein 2        | NUFIP2 | 711330 |
| Nuclear protein, ataxia-telangiectasia locus                              | NPAT   | 707873 |
| Nuclear receptor coactivator 4                                            | NCOA4  | 709509 |
| Nuclear receptor coactivator 6                                            | NCOA6  | 706903 |
| Nuclear receptor subfamily 1 group I member 2                             | NR1I2  | 574226 |
| Nuclear receptor subfamily 2 group F member 2                             | NR2F2  | 707483 |
| Nuclear RNA export factor 1                                               | NXF1   | 718420 |
| Nuclear RNA export factor 3                                               | NXF3   | 695351 |
| Nuclear transcription factor Y subunit gamma                              | NFYC   | 696290 |
| Nuclear transport factor 2-like export factor 1                           | NXT1   | 711846 |
| Nuclear transport factor 2-like export factor 2                           | NXT2   | 704593 |
| Nucleic acid binding protein 2                                            | NABP2  | 709344 |
| Nucleobindin 2                                                            | NUCB2  | 697084 |
| Nucleolar protein 10                                                      | NOL10  | 695849 |
| Nucleolar protein 8                                                       | NOL8   | 705799 |
| Nucleolar protein interacting with the FHA domain of MKI67                | NIFK   | 697198 |
| Nucleolin                                                                 | NCL    | 720965 |
| Nucleophosmin/nucleoplasmin 3                                             | NPM3   | 712300 |
| Nucleoporin 107kda                                                        | NUP107 | 718214 |
| Nucleoporin 205kda                                                        | NUP205 | 708216 |
| Nucleoporin 35kda                                                         | NUP35  | 706497 |
| Nucleoporin 37kda                                                         | NUP37  | 697933 |
| Nucleoporin 50kda                                                         | NUP50  | 713282 |
| Nucleoporin 85kda                                                         | NUP85  | 705628 |
| Nucleoporin 88kda                                                         | NUP88  | 711734 |
| Nucleoside-triphosphatase, cancer-related                                 | NTPCR  | 712959 |
| Nucleosome assembly protein 1-like 5                                      | NAP1L5 | 703223 |
| Nudc nuclear distribution protein                                         | NUDC   | 719986 |
| Nude neurodevelopment protein 1                                           | NDE1   | 717754 |
| Nude neurodevelopment protein 1-like 1                                    | NDEL1  | 721973 |
| Nudix hydrolase 1                                                         | NUDT1  | 713078 |
| Nudix hydrolase 13                                                        | NUDT13 | 707796 |
| Nudix hydrolase 2                                                         | NUDT2  | 701795 |
| Nudix hydrolase 22                                                        | NUDT22 | 717864 |
| Nudix hydrolase 5                                                         | NUDT5  | 694368 |
| Nudix hydrolase 6                                                         | NUDT6  | 708421 |
| Nudix hydrolase 9                                                         | NUDT9  | 701344 |

|                                                                           |         |           |
|---------------------------------------------------------------------------|---------|-----------|
| Numb homolog ( <i>Drosophila</i> )                                        | NUMB    | 696528    |
| O-6-methylguanine-DNA methyltransferase                                   | MGMT    | 698134    |
| O-acyl-ADP-ribose deacylase 1                                             | OARD1   | 719685    |
| Oculocerebrorenal syndrome of Lowe                                        | OCRL    | 702345    |
| Olfactomedin 2                                                            | OLFM2   | 711336    |
| Olfactomedin like 2B                                                      | OLFML2B | 720062    |
| Olfactomedin like 3                                                       | OLFML3  | 707969    |
| Olfactory receptor, family 2, subfamily AG, member 2                      | OR2AG2  | 709556    |
| Oligonucleotide/oligosaccharide-binding fold containing 1                 | OBFC1   | 714968    |
| Optic atrophy 3 (autosomal recessive, with chorea and spastic paraplegia) | OPA3    | 714806    |
| Oral-facial-digital syndrome 1                                            | OFD1    | 711677    |
| Origin recognition complex subunit 1                                      | ORC1    | 713271    |
| Origin recognition complex subunit 3                                      | ORC3    | 700773    |
| Origin recognition complex subunit 5                                      | ORC5    | 696683    |
| ORMDL sphingolipid biosynthesis regulator 2                               | ORMDL2  | 710296    |
| ORMDL sphingolipid biosynthesis regulator 3                               | ORMDL3  | 699154    |
| Ornithine aminotransferase                                                | OAT     | 693970    |
| Ornithine decarboxylase antizyme 1                                        | OAZ1    | 721477    |
| O-sialoglycoprotein endopeptidase                                         | OSGEP   | 702512    |
| Oxoglutarate (alpha-ketoglutarate) dehydrogenase (lipoamide)              | OGDH    | 698854    |
| Oxysterol binding protein                                                 | OSBP    | 699325    |
| Oxysterol binding protein like 8                                          | OSBPL8  | 693338    |
| P21 protein (Cdc42/Rac)-activated kinase 1                                | PAK1    | 698585    |
| P450 (cytochrome) oxidoreductase                                          | POR     | 715888    |
| PAK1 interacting protein 1                                                | PAK1IP1 | 697856    |
| Palmitoyl-protein thioesterase 1                                          | PPT1    | 693377    |
| PAN2 poly(A) specific ribonuclease subunit                                | PAN2    | 712478    |
| Pancreatic polypeptide                                                    | PPY     | 713988    |
| Pantothenate kinase 1                                                     | PANK1   | 696041    |
| Pantothenate kinase 4                                                     | PANK4   | 694804    |
| PAP associated domain containing 7                                        | PAPD7   | 713853    |
| Par-3 family cell polarity regulator                                      | PARD3   | 706472    |
| Paraneoplastic Ma antigen 1                                               | PNMA1   | 697618    |
| Paraoxonase 2                                                             | PON2    | 699107    |
| Paraspeckle component 1                                                   | PSPC1   | 705080    |
| Parkinson protein 7                                                       | PARK7   | 708377    |
| Partner of NOB1 homolog                                                   | PNO1    | 100337566 |
| Paternally expressed 3                                                    | PEG3    | 707825    |
| PAX3 and PAX7 binding protein 1                                           | PAXBP1  | 700489    |
| PAXIP1 associated glutamate-rich protein 1                                | PAGR1   | 706839    |
| PC-esterase domain containing 1A                                          | PCED1A  | 716956    |
| PDZ and LIM domain 1                                                      | PDLIM1  | 702998    |
| PDZ domain containing 4                                                   | PDZD4   | 697387    |
| PDZ domain containing ring finger 3                                       | PDZRN3  | 709901    |
| Pecanex-like 4 ( <i>Drosophila</i> )                                      | PCNXL4  | 702758    |
| Peptidase (mitochondrial processing) alpha                                | PMPCA   | 721742    |
| Peptide deformylase (mitochondrial)                                       | PDF     | 100427223 |

|                                                            |          |           |
|------------------------------------------------------------|----------|-----------|
| Peptidoglycan recognition protein 1                        | PGLYRP1  | 718480    |
| Peptidylprolyl isomerase B (cyclophilin B)                 | PPIB     | 706757    |
| Peptidylprolyl isomerase domain and WD repeat containing 1 | PPWD1    | 696267    |
| Peptidylprolyl isomerase E (cyclophilin E)                 | PPIE     | 716340    |
| Peptidylprolyl isomerase F                                 | PPIF     | 574137    |
| Peptidylprolyl isomerase G (cyclophilin G)                 | PPIG     | 706262    |
| Peptidylprolyl isomerase H (cyclophilin H)                 | PPIH     | 697669    |
| Peptidylprolyl isomerase like 3                            | PPIL3    | 700456    |
| Periaxin                                                   | PRX      | 702329    |
| Peroxiredoxin 2                                            | PRDX2    | 716665    |
| Peroxiredoxin 3                                            | PRDX3    | 702882    |
| Peroxiredoxin 4                                            | PRDX4    | 697635    |
| Peroxiredoxin 6                                            | PRDX6    | 706486    |
| Peroxisomal biogenesis factor 11 beta                      | PEX11B   | 698184    |
| Peroxisomal membrane protein 2                             | PXMP2    | 693648    |
| Peroxisome proliferator-activated receptor delta           | PPARD    | 718861    |
| PEST proteolytic signal containing nuclear protein         | PCNP     | 702162    |
| PHD finger protein 1                                       | PHF1     | 718337    |
| PHD finger protein 2                                       | PHF2     | 717585    |
| PHD finger protein 23                                      | PHF23    | 714538    |
| PHD finger protein 6                                       | PHF6     | 707390    |
| PHD finger protein 7                                       | PHF7     | 697103    |
| Phenylalanyl-trna synthetase 2, mitochondrial              | FARS2    | 710945    |
| Phosphatase, orphan 1                                      | PHOSPHO1 | 698959    |
| Phosphatase, orphan 2                                      | PHOSPHO2 | 100429653 |
| Phosphate cytidylyltransferase 1, choline, alpha           | PCYT1A   | 722105    |
| Phosphatidylglycerophosphate synthase 1                    | PGS1     | 710125    |
| Phosphatidylinositol 3-kinase catalytic subunit type 3     | PIK3C3   | 693918    |
| Phosphatidylinositol 4-kinase, catalytic, alpha            | PI4KA    | 698020    |
| Phosphatidylinositol 4-kinase, catalytic, beta             | PI4KB    | 710104    |
| Phosphatidylinositol glycan anchor biosynthesis class A    | PIGA     | 712514    |
| Phosphatidylinositol glycan anchor biosynthesis class B    | PIGB     | 698122    |
| Phosphatidylinositol glycan anchor biosynthesis class C    | PIGC     | 705657    |
| Phosphatidylinositol glycan anchor biosynthesis class F    | PIGF     | 714844    |
| Phosphatidylinositol glycan anchor biosynthesis class G    | PIGG     | 714088    |
| Phosphatidylinositol glycan anchor biosynthesis class H    | PIGH     | 710780    |
| Phosphatidylinositol glycan anchor biosynthesis class S    | PIGS     | 709115    |
| Phosphatidylinositol transfer protein beta                 | PITPNB   | 713414    |
| Phosphatidylserine synthase 1                              | PTDSS1   | 701486    |
| Phosphodiesterase 12                                       | PDE12    | 703552    |
| Phosphodiesterase 5A                                       | PDE5A    | 705592    |
| Phosphodiesterase 6D                                       | PDE6D    | 712629    |
| Phosphodiesterase 8A                                       | PDE8A    | 694750    |
| Phosphoenolpyruvate carboxykinase 2 (mitochondrial)        | PCK2     | 714922    |
| Phosphoglucomutase 1                                       | PGM1     | 699401    |
| Phosphoglucomutase 3                                       | PGM3     | 694464    |
| Phosphohistidine phosphatase 1                             | PHPT1    | 721674    |
| Phosphoinositide-3-kinase regulatory subunit 4             | PIK3R4   | 718012    |

|                                                                                                                                |         |           |
|--------------------------------------------------------------------------------------------------------------------------------|---------|-----------|
| Phospholipase A2 group XVI                                                                                                     | PLA2G16 | 722178    |
| Phospholipase B domain containing 1                                                                                            | PLBD1   | 698939    |
| Phospholipase C delta 1                                                                                                        | PLCD1   | 696860    |
| Phospholipase D family member 3                                                                                                | PLD3    | 701083    |
| Phospholipid phosphatase 2                                                                                                     | PLPP2   | 721004    |
| Phospholipid phosphatase 6                                                                                                     | PLPP6   | 695188    |
| Phosphopantothenoylcysteine decarboxylase                                                                                      | PPCDC   | 704015    |
| Phosphopantothenoylcysteine synthetase                                                                                         | PPCS    | 697064    |
| Phosphoribosyl pyrophosphate synthetase 1                                                                                      | PRPS1   | 702529    |
| Phosphoribosyl pyrophosphate synthetase-associated protein 1                                                                   | PRPSAP1 | 706625    |
| Phosphoribosylglycinamide formyltransferase, phosphoribosyl<br>glycinamide synthetase, phosphoribosylaminoimidazole synthetase | GART    | 704926    |
| Phosphorylase kinase, alpha 2 (liver)                                                                                          | PHKA2   | 694376    |
| Phosphorylase, glycogen, liver                                                                                                 | PYGL    | 706853    |
| PIGY upstream reading frame                                                                                                    | PYURF   | 702862    |
| PIH1 domain containing 1                                                                                                       | PIH1D1  | 718787    |
| PIN2/TERF1 interacting, telomerase inhibitor 1                                                                                 | PINX1   | 701523    |
| Pinin, desmosome associated protein                                                                                            | PNN     | 700296    |
| Pirin                                                                                                                          | PIR     | 720959    |
| PITH (C-terminal proteasome-interacting domain of<br>thioredoxin-like) domain containing 1                                     | PITHD1  | 710737    |
| Pituitary tumor-transforming 1                                                                                                 | PTTG1   | 696143    |
| Pituitary tumor-transforming 1 interacting protein                                                                             | PTTG1IP | 722061    |
| Plakophilin 2                                                                                                                  | PKP2    | 100429378 |
| Plasminogen receptor, C-terminal lysine transmembrane protein                                                                  | PLGRKT  | 693286    |
| Plastin 1                                                                                                                      | PLS1    | 714391    |
| Plastin 3                                                                                                                      | PLS3    | 709055    |
| Platelet derived growth factor C                                                                                               | PDGFC   | 700236    |
| Platelet derived growth factor D                                                                                               | PDGFD   | 704310    |
| Platelet-derived growth factor beta polypeptide                                                                                | PDGFB   | 703173    |
| Pleckstrin homology domain containing A1                                                                                       | PLEKHA1 | 705731    |
| Pleckstrin homology domain containing A3                                                                                       | PLEKHA3 | 703417    |
| Pleckstrin homology domain containing J1                                                                                       | PLEKHJ1 | 710129    |
| Pleckstrin homology domain containing O2                                                                                       | PLEKHO2 | 712677    |
| Pleckstrin homology domain interacting protein                                                                                 | PHIP    | 716810    |
| Pleckstrin homology-like domain, family A, member 3                                                                            | PHLDA3  | 709782    |
| Plexin B3                                                                                                                      | PLXNB3  | 696903    |
| Pogo transposable element with ZNF domain                                                                                      | POGZ    | 710634    |
| Poliovirus receptor-related 2 (herpesvirus entry mediator B)                                                                   | PVRL2   | 713229    |
| Polo-like kinase 3                                                                                                             | PLK3    | 704071    |
| Poly(A) binding protein interacting protein 1                                                                                  | PAIP1   | 700869    |
| Poly(A) binding protein interacting protein 2                                                                                  | PAIP2   | 693317    |
| Poly(A) binding protein, cytoplasmic 1                                                                                         | PABPC1  | 705847    |
| Poly(A) binding protein, cytoplasmic 3                                                                                         | PABPC3  | 708617    |
| Poly(A) polymerase gamma                                                                                                       | PAPOLG  | 717781    |
| Poly(ADP-ribose) glycohydrolase                                                                                                | PARG    | 709432    |
| Poly(ADP-ribose) polymerase 1                                                                                                  | PARP1   | 698806    |
| Poly(ADP-ribose) polymerase 2                                                                                                  | PARP2   | 701955    |



|                                                                     |         |           |
|---------------------------------------------------------------------|---------|-----------|
| Poly(rc) binding protein 2                                          | PCBP2   | 703175    |
| Polycomb group ring finger 2                                        | PCGF2   | 694187    |
| Polycomb group ring finger 6                                        | PCGF6   | 714508    |
| Polyglutamine binding protein 1                                     | PQBP1   | 711678    |
| Polyhomeotic homolog 2 (Drosophila)                                 | PHC2    | 710201    |
| Polymerase (DNA directed), beta                                     | POLB    | 704801    |
| Polymerase (DNA directed), gamma                                    | POLG    | 699750    |
| Polymerase (RNA) I polypeptide C                                    | POLR1C  | 700727    |
| Polymerase (RNA) II (DNA directed) polypeptide C, 33kda             | POLR2C  | 704555    |
| Polymerase (RNA) II (DNA directed) polypeptide F                    | POLR2F  | 699566    |
| Polymerase (RNA) II (DNA directed) polypeptide G                    | POLR2G  | 718548    |
| Polymerase (RNA) II (DNA directed) polypeptide H                    | POLR2H  | 100429040 |
| Polymerase (RNA) II (DNA directed) polypeptide I, 14.5kda           | POLR2I  | 712412    |
| Polymerase (RNA) III (DNA directed) polypeptide B                   | POLR3B  | 702711    |
| Polymerase (RNA) III (DNA directed) polypeptide C (62kd)            | POLR3C  | 696943    |
| Polymerase (RNA) III (DNA directed) polypeptide D, 44kda            | POLR3D  | 707923    |
| Polymerase (RNA) III (DNA directed) polypeptide E (80kd)            | POLR3E  | 697901    |
| Polymerase (RNA) III (DNA directed) polypeptide G (32kd)-like       | POLR3GL | 698563    |
| Polypeptide N-acetylgalactosaminyltransferase 1                     | GALNT1  | 708930    |
| Polypeptide N-acetylgalactosaminyltransferase 12                    | GALNT12 | 715128    |
| Polypeptide N-acetylgalactosaminyltransferase 4                     | GALNT4  | 100430612 |
| Polysaccharide biosynthesis domain containing 1                     | PBDC1   | 705125    |
| POP4 homolog, ribonuclease P/MRP subunit                            | POP4    | 700209    |
| POP5 homolog, ribonuclease P/MRP subunit                            | POP5    | 697559    |
| Post-GPI attachment to proteins 3                                   | PGAP3   | 697699    |
| Potassium channel tetramerization domain containing 2               | KCTD2   | 700474    |
| Potassium channel tetramerization domain containing 3               | KCTD3   | 708471    |
| Potassium channel tetramerization domain containing 6               | KCTD6   | 701810    |
| Potassium channel tetramerization domain containing 9               | KCTD9   | 711515    |
| Potassium channel, voltage gated eag related subfamily H, member 3  | KCNH3   | 710838    |
| Potassium channel, voltage gated Shaw related subfamily C, member 2 | KCNC2   | 100430906 |
| Potassium voltage-gated channel, modifier subfamily S, member 1     | KCNS1   | 711715    |
| POZ (BTB) and AT hook containing zinc finger 1                      | PATZ1   | 718381    |
| PR domain containing 1, with ZNF domain                             | PRDM1   | 696757    |
| PR domain containing 14                                             | PRDM14  | 693324    |
| PR domain containing 2, with ZNF domain                             | PRDM2   | 716295    |
| PR domain containing 4                                              | PRDM4   | 704529    |
| Praja ring finger 1, E3 ubiquitin protein ligase                    | PJA1    | 695038    |
| Pre-B-cell leukemia homeobox 4                                      | PBX4    | 106994668 |
| Prefoldin subunit 2                                                 | PFDN2   | 719886    |
| Prefoldin subunit 5                                                 | PFDN5   | 702355    |
| Premelanosome protein                                               | PMEL    | 710921    |
| Pre-mrna processing factor 3                                        | PRPF3   | 706898    |
| Pre-mrna processing factor 40 homolog A                             | PRPF40A | 696668    |
| Presenilin 1                                                        | PSEN1   | 696274    |
| Presenilin enhancer gamma secretase subunit                         | PSENEN  | 100429005 |

|                                                                                 |          |        |
|---------------------------------------------------------------------------------|----------|--------|
| Presequence translocase-associated motor 16 homolog<br>( <i>S. Cerevisiae</i> ) | PAM16    | 704987 |
| Prickle homolog 1                                                               | PRICKLE1 | 701864 |
| Prion protein                                                                   | PRNP     | 717859 |
| Progesterone receptor membrane component 1                                      | PGRMC1   | 711792 |
| Programmed cell death 10                                                        | PDCD10   | 699597 |
| Programmed cell death 2                                                         | PDCD2    | 696380 |
| Programmed cell death 2-like                                                    | PDCD2L   | 705688 |
| Programmed cell death 5                                                         | PDCD5    | 702277 |
| Programmed cell death 6                                                         | PDCD6    | 723043 |
| Programmed cell death 7                                                         | PDCD7    | 708758 |
| Prohibitin                                                                      | PHB      | 699334 |
| Prohibitin 2                                                                    | PHB2     | 714693 |
| Proliferating cell nuclear antigen                                              | PCNA     | 718006 |
| Proline and serine rich 1                                                       | PROSER1  | 696606 |
| Proline and serine rich 2                                                       | PROSER2  | 693705 |
| Proline rich 15                                                                 | PRR15    | 696869 |
| Proline rich 3                                                                  | PRR3     | 711699 |
| Proline rich Gla (G-carboxyglutamic acid) 1                                     | PRRG1    | 696938 |
| Proline rich nuclear receptor coactivator 2                                     | PNRC2    | 719213 |
| Proline/serine-rich coiled-coil 1                                               | PSRC1    | 698060 |
| Proline-rich coiled-coil 1                                                      | PRRC1    | 704248 |
| Prolyl 4-hydroxylase, alpha polypeptide II                                      | P4HA2    | 707157 |
| Prolylcarboxypeptidase                                                          | PRCP     | 701305 |
| Prominin 1                                                                      | PROM1    | 714610 |
| Propionyl-coa carboxylase beta subunit                                          | PCCB     | 716964 |
| Prostaglandin D2 receptor 2                                                     | PTGDR2   | 695853 |
| Prostaglandin D2 synthase                                                       | PTGDS    | 707990 |
| Prostaglandin E synthase 3                                                      | PTGES3   | 713353 |
| Protease, serine 16                                                             | PRSS16   | 702060 |
| Proteasomal ATPase associated factor 1                                          | PAAF1    | 718755 |
| Proteasome (prosome, macropain) assembly chaperone 1                            | PSMG1    | 715758 |
| Proteasome (prosome, macropain) assembly chaperone 2                            | PSMG2    | 717110 |
| Proteasome (prosome, macropain) assembly chaperone 3                            | PSMG3    | 697590 |
| Proteasome 26S subunit, ATPase 3                                                | PSMC3    | 713356 |
| Proteasome 26S subunit, ATPase 4                                                | PSMC4    | 699847 |
| Proteasome 26S subunit, non-ATPase 1                                            | PSMD1    | 711724 |
| Proteasome 26S subunit, non-ATPase 10                                           | PSMD10   | 703596 |
| Proteasome 26S subunit, non-ATPase 12                                           | PSMD12   | 718756 |
| Proteasome 26S subunit, non-ATPase 14                                           | PSMD14   | 701063 |
| Proteasome 26S subunit, non-ATPase 6                                            | PSMD6    | 698601 |
| Proteasome 26S subunit, non-ATPase 7                                            | PSMD7    | 705581 |
| Proteasome activator subunit 1                                                  | PSME1    | 714364 |
| Proteasome activator subunit 2                                                  | PSME2    | 715288 |
| Proteasome subunit alpha 2                                                      | PSMA2    | 701683 |
| Proteasome subunit alpha 3                                                      | PSMA3    | 700251 |
| Proteasome subunit alpha 4                                                      | PSMA4    | 710417 |
| Proteasome subunit alpha 5                                                      | PSMA5    | 698435 |

|                                                                                                     |           |           |
|-----------------------------------------------------------------------------------------------------|-----------|-----------|
| Proteasome subunit alpha 6                                                                          | PSMA6     | 695113    |
| Proteasome subunit beta 1                                                                           | PSMB1     | 696133    |
| Proteasome subunit beta 10                                                                          | PSMB10    | 701088    |
| Proteasome subunit beta 2                                                                           | PSMB2     | 712193    |
| Proteasome subunit beta 4                                                                           | PSMB4     | 710734    |
| Proteasome subunit beta 6                                                                           | PSMB6     | 710028    |
| Proteasome subunit beta 7                                                                           | PSMB7     | 694567    |
| Proteasome subunit beta 9                                                                           | PSMB9     | 716980    |
| Protection of telomeres 1                                                                           | POT1      | 696751    |
| Protein C receptor                                                                                  | PROCR     | 706040    |
| Protein disulfide isomerase family A member 5                                                       | PDIA5     | 715226    |
| Protein disulfide isomerase family A member 6                                                       | PDIA6     | 706781    |
| Protein inhibitor of activated STAT 3                                                               | PIAS3     | 706775    |
| Protein kinase, AMP-activated, alpha 2 catalytic subunit                                            | PRKAA2    | 717703    |
| Protein kinase, AMP-activated, beta 1 non-catalytic subunit                                         | PRKAB1    | 695737    |
| Protein kinase, interferon-inducible double stranded RNA dependent activator                        | PRKRA     | 703063    |
| Protein odr-4 homolog                                                                               | C1H1orf27 | 713801    |
| Protein O-glucosyltransferase 1                                                                     | POGLUT1   | 712357    |
| Protein phosphatase 1 regulatory subunit 12C                                                        | PPP1R12C  | 698538    |
| Protein phosphatase 1 regulatory subunit 15A                                                        | PPP1R15A  | 718350    |
| Protein phosphatase 1 regulatory subunit 21                                                         | PPP1R21   | 715917    |
| Protein phosphatase 1 regulatory subunit 35                                                         | PPP1R35   | 712067    |
| Protein phosphatase 1, catalytic subunit, gamma isozyme                                             | PPP1CC    | 709935    |
| Protein phosphatase 2 regulatory subunit B', gamma                                                  | PPP2R5C   | 718894    |
| Protein phosphatase 2 regulatory subunit B'', gamma                                                 | PPP2R3C   | 694616    |
| Protein phosphatase 2, catalytic subunit, beta isozyme                                              | PPP2CB    | 695118    |
| Protein phosphatase 3, catalytic subunit, beta isozyme                                              | PPP3CB    | 706955    |
| Protein phosphatase 3, catalytic subunit, gamma isozyme                                             | PPP3CC    | 708233    |
| Protein phosphatase 4 regulatory subunit 3B                                                         | PPP4R3B   | 718961    |
| Protein phosphatase, Mg <sup>2+</sup> /Mn <sup>2+</sup> dependent 1A                                | PPM1A     | 702987    |
| Protein phosphatase, Mg <sup>2+</sup> /Mn <sup>2+</sup> dependent 1B                                | PPM1B     | 713918    |
| Protein phosphatase, Mg <sup>2+</sup> /Mn <sup>2+</sup> dependent 1F                                | PPM1F     | 698441    |
| Protein phosphatase, Mg <sup>2+</sup> /Mn <sup>2+</sup> dependent 1G                                | PPM1G     | 700695    |
| Protein phosphatase, Mg <sup>2+</sup> /Mn <sup>2+</sup> dependent 1M                                | PPM1M     | 697788    |
| Protein tyrosine phosphatase type IVA, member 2                                                     | PTP4A2    | 706489    |
| Protein tyrosine phosphatase, non-receptor type 1                                                   | PTPN1     | 702016    |
| Protein tyrosine phosphatase, non-receptor type 12                                                  | PTPN12    | 721538    |
| Protein tyrosine phosphatase, non-receptor type 4 (megakaryocyte)                                   | PTPN4     | 695516    |
| Protein-L-isoaspartate (D-aspartate) O-methyltransferase                                            | PCMT1     | 695893    |
| Protoporphyrinogen oxidase                                                                          | PPOX      | 719910    |
| Pterin-4 alpha-carbinolamine dehydratase/dimerization cofactor of hepatocyte nuclear factor 1 alpha | PCBD1     | 709875    |
| Pumilio RNA binding family member 1                                                                 | PUM1      | 704848    |
| Pumilio RNA binding family member 2                                                                 | PUM2      | 701782    |
| Putative homeodomain transcription factor 1                                                         | PHTF1     | 707208    |
| PWP2 periodic tryptophan protein homolog (yeast)                                                    | PWP2      | 722216    |
| Pyruvate dehydrogenase (lipoamide) alpha 1                                                          | PDHA1     | 100423990 |

|                                                                   |          |        |
|-------------------------------------------------------------------|----------|--------|
| Pyruvate dehydrogenase (lipoamide) beta                           | PDHB     | 574227 |
| R3H domain and coiled-coil containing 1 like                      | R3HCC1L  | 707600 |
| Rab geranylgeranyltransferase, beta subunit                       | RABGGTB  | 705421 |
| Rab interacting lysosomal protein-like 2                          | RILPL2   | 704853 |
| RAB, member of RAS oncogene family-like 2B                        | RABL2B   | 716615 |
| RAB18, member RAS oncogene family                                 | RAB18    | 708843 |
| RAB23, member RAS oncogene family                                 | RAB23    | 712860 |
| RAB28, member RAS oncogene family                                 | RAB28    | 713566 |
| RAB2A, member RAS oncogene family                                 | RAB2A    | 699383 |
| RAB30, member RAS oncogene family                                 | RAB30    | 701550 |
| RAB3A interacting protein                                         | RAB3IP   | 717215 |
| RAB4A, member RAS oncogene family                                 | RAB4A    | 694288 |
| RAB5A, member RAS oncogene family                                 | RAB5A    | 697712 |
| RAB5B, member RAS oncogene family                                 | RAB5B    | 708347 |
| RAB5C, member RAS oncogene family                                 | RAB5C    | 709308 |
| RAB6A, member RAS oncogene family                                 | RAB6A    | 718717 |
| RAB6A, member RAS oncogene family                                 | RAB6A    | 718717 |
| RAB9A, member RAS oncogene family                                 | RAB9A    | 720906 |
| Rac gtpase activating protein 1                                   | RACGAP1  | 711887 |
| RAD17 checkpoint clamp loader component                           | RAD17    | 700116 |
| RAD21 cohesin complex component                                   | RAD21    | 700633 |
| RAD50 interactor 1                                                | RINT1    | 698414 |
| RAD51 associated protein 1                                        | RAD51AP1 | 710918 |
| RAD51 paralog C                                                   | RAD51C   | 714828 |
| RAD52 motif containing 1                                          | RDM1     | 716624 |
| RAD9 checkpoint clamp component A                                 | RAD9A    | 712345 |
| RAD9-HUS1-RAD1 interacting nuclear orphan 1                       | RHNO1    | 709008 |
| Radial spoke 3 homolog (Chlamydomonas)                            | RSPH3    | 704059 |
| Radixin                                                           | RDX      | 709018 |
| Raf-1 proto-oncogene, serine/threonine kinase                     | RAF1     | 694725 |
| Raftlin, lipid raft linker 1                                      | RFTN1    | 695142 |
| Ral GEF with PH domain and SH3 binding motif 1                    | RALGPS1  | 708253 |
| Ral gtpase activating protein, alpha subunit 1 (catalytic)        | RALGAPA1 | 695674 |
| Ral guanine nucleotide dissociation stimulator-like 1             | RGL1     | 717554 |
| RALBP1 associated Eps domain containing 2                         | REPS2    | 721024 |
| RALY heterogeneous nuclear ribonucleoprotein                      | RALY     | 713317 |
| RAN binding protein 10                                            | RANBP10  | 700911 |
| RAN binding protein 6                                             | RANBP6   | 715799 |
| RAN guanine nucleotide release factor                             | RANGRF   | 717206 |
| RAN, member RAS oncogene family                                   | RAN      | 709200 |
| Rap guanine nucleotide exchange factor 2                          | RAPGEF2  | 704717 |
| RAS and EF-hand domain containing                                 | RASEF    | 708296 |
| Ras and Rab interactor 2                                          | RIN2     | 702775 |
| Ras association (ralgds/AF-6) domain family (N-terminal) member 8 | RASSF8   | 708284 |
| Ras association (ralgds/AF-6) domain family member 4              | RASSF4   | 706096 |
| Ras homolog family member C                                       | RHOC     | 706034 |
| Ras homolog family member D                                       | RHOD     | 712969 |
| Ras homolog family member J                                       | RHOJ     | 705603 |

|                                                                                       |          |        |
|---------------------------------------------------------------------------------------|----------|--------|
| RAS p21 protein activator (gtpase activating protein) 1                               | RASA1    | 694085 |
| RAS protein activator like 2                                                          | RASAL2   | 718958 |
| RAS-like family 10 member A                                                           | RASL10A  | 714587 |
| Ras-like without CAAX 1                                                               | RIT1     | 717985 |
| Ras-related GTP binding C                                                             | RRAGC    | 715549 |
| RB1 inducible coiled-coil 1                                                           | RB1CC1   | 710330 |
| Rearranged L-myc fusion                                                               | RLF      | 693503 |
| Receptor (G protein-coupled) activity modifying protein 1                             | RAMP1    | 574329 |
| Receptor interacting serine/threonine kinase 2                                        | RIPK2    | 695567 |
| Receptor interacting serine/threonine kinase 4                                        | RIPK4    | 715077 |
| Recq helicase-like                                                                    | RECQL    | 705871 |
| Regucalcin                                                                            | RGN      | 705733 |
| Regulation of nuclear pre-mrna domain containing 1A                                   | RPRD1A   | 709217 |
| Regulator of calcineurin 1                                                            | RCAN1    | 697108 |
| Regulator of chromosome condensation (RCC1) and BTB (POZ) domain containing protein 1 | RCBTB1   | 706627 |
| Regulator of G-protein signaling 16                                                   | RGS16    | 715599 |
| Regulator of G-protein signaling 7                                                    | RGS7     | 707747 |
| Regulator of microtubule dynamics 1                                                   | RMDN1    | 694237 |
| Related RAS viral (r-ras) oncogene homolog 2                                          | RRAS2    | 699700 |
| REM2 and RAB-like small gtpase 1                                                      | RSG1     | 697922 |
| Renin                                                                                 | REN      | 574299 |
| Replication protein A1                                                                | RPA1     | 721272 |
| Replication protein A2                                                                | RPA2     | 716612 |
| Replication protein A3                                                                | RPA3     | 696248 |
| Replication timing regulatory factor 1                                                | RIF1     | 694817 |
| Required for meiotic nuclear division 1 homolog                                       | RMND1    | 704665 |
| REST corepressor 3                                                                    | RCOR3    | 712037 |
| Retbindin                                                                             | RTBDN    | 716766 |
| Reticulon 4                                                                           | RTN4     | 619181 |
| Reticulon 4 interacting protein 1                                                     | RTN4IP1  | 697236 |
| Retinoblastoma binding protein 4                                                      | RBBP4    | 708710 |
| Retinoblastoma binding protein 7                                                      | RBBP7    | 713843 |
| Retinoblastoma binding protein 8                                                      | RBBP8    | 677718 |
| Retinoic acid induced 1                                                               | RAI1     | 699215 |
| Retinoic acid induced 14                                                              | RAI14    | 698620 |
| Retinol dehydrogenase 5 (11-cis/9-cis)                                                | RDH5     | 709644 |
| Reversion-inducing-cysteine-rich protein with kazal motifs                            | RECK     | 694043 |
| RFT1 homolog                                                                          | RFT1     | 694586 |
| Rho family gtpase 3                                                                   | RND3     | 694168 |
| Rho gtpase activating protein 10                                                      | ARHGAP10 | 708458 |
| Rho gtpase activating protein 15                                                      | ARHGAP15 | 705311 |
| Rho gtpase activating protein 21                                                      | ARHGAP21 | 706428 |
| Rho guanine nucleotide exchange factor 1                                              | ARHGEF1  | 722198 |
| Rho guanine nucleotide exchange factor 10                                             | ARHGEF10 | 722745 |
| Rho guanine nucleotide exchange factor 5                                              | ARHGEF5  | 705891 |
| Rhomboid 5 homolog 2 (Drosophila)                                                     | RHBDF2   | 707033 |
| Rhomboid domain containing 3                                                          | RHBDD3   | 714479 |

|                                                                |          |           |
|----------------------------------------------------------------|----------|-----------|
| Ribonuclease P/MRP 21kda subunit                               | RPP21    | 713056    |
| Ribonuclease P/MRP 40kda subunit                               | RPP40    | 710505    |
| Ribonuclease, rnase A family, 4                                | RNASE4   | 703903    |
| Ribonucleotide reductase M1                                    | RRM1     | 717990    |
| Ribophorin II                                                  | RPN2     | 708971    |
| Ribosomal protein l10a                                         | RPL10A   | 718783    |
| Ribosomal protein L17                                          | RPL17    | 698967    |
| Ribosomal protein L22                                          | RPL22    | 703050    |
| Ribosomal protein L23                                          | RPL23    | 694719    |
| Ribosomal protein l23a                                         | RPL23A   | 710490    |
| Ribosomal protein L24                                          | RPL24    | 702381    |
| Ribosomal protein L26                                          | RPL26    | 717378    |
| Ribosomal protein L26 like 1                                   | RPL26L1  | 703230    |
| Ribosomal protein L27                                          | RPL27    | 712352    |
| Ribosomal protein l27a                                         | RPL27A   | 708863    |
| Ribosomal protein L3                                           | RPL3     | 707176    |
| Ribosomal protein L35                                          | RPL35    | 693604    |
| Ribosomal protein l35a                                         | RPL35A   | 714858    |
| Ribosomal protein L4                                           | RPL4     | 710590    |
| Ribosomal protein L7 like 1                                    | RPL7L1   | 698786    |
| Ribosomal protein l7a                                          | RPL7A    | 722215    |
| Ribosomal protein L8                                           | RPL8     | 708535    |
| Ribosomal protein S10                                          | RPS10    | 718606    |
| Ribosomal protein S11                                          | RPS11    | 718844    |
| Ribosomal protein S13                                          | RPS13    | 697513    |
| Ribosomal protein S14                                          | RPS14    | 710901    |
| Ribosomal protein S16                                          | RPS16    | 697219    |
| Ribosomal protein S17-like                                     | RPS17L   | 100425105 |
| Ribosomal protein S19 binding protein 1                        | RPS19BP1 | 704079    |
| Ribosomal protein S2                                           | RPS2     | 693615    |
| Ribosomal protein S21                                          | RPS21    | 699565    |
| Ribosomal protein S27                                          | RPS27    | 106992521 |
| Ribosomal protein S27 like                                     | RPS27L   | 705483    |
| Ribosomal protein s27a                                         | RPS27A   | 718909    |
| Ribosomal protein S28                                          | RPS28    | 707133    |
| Ribosomal protein S4, X-linked                                 | RPS4X    | 699397    |
| Ribosomal protein S5                                           | RPS5     | 711259    |
| Ribosomal protein S6 kinase, 90kda, polypeptide 1              | RPS6KA1  | 714794    |
| Ribosomal protein S7                                           | RPS7     | 721900    |
| Ribosomal protein S8                                           | RPS8     | 703957    |
| Ribosomal protein, large, P0                                   | RPLP0    | 574363    |
| Ribosomal protein, large, P1                                   | RPLP1    | 695442    |
| Ribosomal protein, large, P2                                   | RPLP2    | 700698    |
| Ribosomal RNA adenine dimethylase domain containing 1          | RRNAD1   | 718599    |
| Ribosomal RNA processing 12 homolog                            | RRP12    | 705854    |
| Ribosomal RNA processing 8, methyltransferase, homolog (yeast) | RRP8     | 712011    |
| Ribosome production factor 1 homolog                           | RPF1     | 710286    |
| Ribulose-5-phosphate-3-epimerase                               | RPE      | 711322    |

|                                                                            |         |           |
|----------------------------------------------------------------------------|---------|-----------|
| Ring finger and WD repeat domain 2, E3 ubiquitin protein ligase            | RFWD2   | 708802    |
| Ring finger protein (C3H2C3 type) 6                                        | RNF6    | 721550    |
| Ring finger protein 112                                                    | RNF112  | 703312    |
| Ring finger protein 115                                                    | RNF115  | 697067    |
| Ring finger protein 121                                                    | RNF121  | 718216    |
| Ring finger protein 130                                                    | RNF130  | 715356    |
| Ring finger protein 14                                                     | RNF14   | 705363    |
| Ring finger protein 146                                                    | RNF146  | 712152    |
| Ring finger protein 167                                                    | RNF167  | 710656    |
| Ring finger protein 181                                                    | RNF181  | 695977    |
| Ring finger protein 185                                                    | RNF185  | 718351    |
| Ring finger protein 219                                                    | RNF219  | 697577    |
| Ring finger protein 34, E3 ubiquitin protein ligase                        | RNF34   | 700062    |
| Ring finger protein 38                                                     | RNF38   | 693346    |
| Ring finger protein 41, E3 ubiquitin protein ligase                        | RNF41   | 711969    |
| Ring finger protein, transmembrane 1                                       | RNFT1   | 712052    |
| RNA 2',3'-cyclic phosphate and 5'-OH ligase                                | RTCB    | 717258    |
| RNA binding motif (RNP1, RRM) protein 3                                    | RBM3    | 710689    |
| RNA binding motif protein 10                                               | RBM10   | 711791    |
| RNA binding motif protein 15                                               | RBM15   | 701414    |
| RNA binding motif protein 17                                               | RBM17   | 712996    |
| RNA binding motif protein 18                                               | RBM18   | 698457    |
| RNA binding motif protein 22                                               | RBM22   | 712713    |
| RNA binding motif protein 39                                               | RBM39   | 704198    |
| RNA binding motif protein 45                                               | RBM45   | 702714    |
| RNA binding motif protein 5                                                | RBM5    | 704114    |
| RNA binding motif protein 7                                                | RBM7    | 695401    |
| RNA exonuclease 2                                                          | REXO2   | 695292    |
| RNA polymerase II associated protein 3                                     | RPAP3   | 703749    |
| RNA pseudouridylate synthase domain containing 3                           | RPUSD3  | 700349    |
| Runt-related transcription factor 1; translocated to, 1 (cyclin D-related) | RUNX1T1 | 696934    |
| Ruvb-like AAA ATPase 1                                                     | RUVBL1  | 706044    |
| Ruvb-like AAA ATPase 2                                                     | RUVBL2  | 100428794 |
| RWD domain containing 2A                                                   | RWDD2A  | 694598    |
| RWD domain containing 3                                                    | RWDD3   | 709817    |
| RWD domain containing 4                                                    | RWDD4   | 708882    |
| SAC1 suppressor of actin mutations 1-like (yeast)                          | SACM1L  | 714107    |
| SAGA complex associated factor 29                                          | SGF29   | 709124    |
| Sarcoglycan epsilon                                                        | SGCE    | 700104    |
| Sarcolemma associated protein                                              | SLMAP   | 703086    |
| SCY1-like, kinase-like 2                                                   | SCYL2   | 695284    |
| SCY1-like, kinase-like 3                                                   | SCYL3   | 701768    |
| SEC11 homolog A, signal peptidase complex subunit                          | SEC11A  | 695951    |
| SEC13 homolog, nuclear pore and COPII coat complex component               | SEC13   | 697339    |
| SEC22 homolog A, vesicle trafficking protein                               | SEC22A  | 715277    |
| SEC22 homolog C, vesicle trafficking protein                               | SEC22C  | 716351    |
| Sec23 homolog B, COPII coat complex component                              | SEC23B  | 698440    |

|                                                                                                                  |          |           |
|------------------------------------------------------------------------------------------------------------------|----------|-----------|
| SEC23 interacting protein                                                                                        | SEC23IP  | 704155    |
| SEC24 homolog C, COPII coat complex component                                                                    | SEC24C   | 714688    |
| SEC31 homolog A, COPII coat complex component                                                                    | SEC31A   | 693687    |
| Sec61 translocon alpha 1 subunit                                                                                 | SEC61A1  | 709787    |
| Sec61 translocon alpha 2 subunit                                                                                 | SEC61A2  | 100427731 |
| Sec61 translocon beta subunit                                                                                    | SEC61B   | 717815    |
| Sec61 translocon gamma subunit                                                                                   | SEC61G   | 716898    |
| SECIS binding protein 2                                                                                          | SECISBP2 | 697442    |
| Secreted frizzled-related protein 1                                                                              | SFRP1    | 702876    |
| Secretion associated, Ras related gtpase 1A                                                                      | SAR1A    | 711277    |
| Sel-1 suppressor of lin-12-like 3 (C. Elegans)                                                                   | SEL1L3   | 695033    |
| Selenophosphate synthetase 1                                                                                     | SEPHS1   | 696038    |
| Selenoprotein K                                                                                                  | SELK     | 693421    |
| Selenoprotein M                                                                                                  | SELM     | 718290    |
| Sema domain, immunoglobulin domain (Ig), transmembrane domain (TM) and short cytoplasmic domain, (semaphorin) 4D | SEMA4D   | 697697    |
| Serglycin                                                                                                        | SRGN     | 712299    |
| Serine carboxypeptidase 1                                                                                        | SCPEP1   | 708197    |
| Serine dehydratase-like                                                                                          | SDSL     | 714721    |
| Serine incorporator 1                                                                                            | SERINC1  | 713999    |
| Serine palmitoyltransferase small subunit A                                                                      | SPTSSA   | 717580    |
| Serine peptidase inhibitor, Kunitz type, 2                                                                       | SPINT2   | 714755    |
| Serine/arginine-rich splicing factor 1                                                                           | SRSF1    | 713958    |
| Serine/arginine-rich splicing factor 11                                                                          | SRSF11   | 702698    |
| Serine/arginine-rich splicing factor 12                                                                          | SRSF12   | 700497    |
| Serine/arginine-rich splicing factor 3                                                                           | SRSF3    | 719123    |
| Serine/arginine-rich splicing factor 4                                                                           | SRSF4    | 717401    |
| Serine/arginine-rich splicing factor 7                                                                           | SRSF7    | 713388    |
| Serine/arginine-rich splicing factor 8                                                                           | SRSF8    | 699079    |
| Serine/threonine kinase 3                                                                                        | STK3     | 707425    |
| Serine/threonine kinase 38 like                                                                                  | STK38L   | 711047    |
| Serine/threonine protein kinase 26                                                                               | STK26    | 707739    |
| Serine/threonine/tyrosine kinase 1                                                                               | STYK1    | 717844    |
| Serologically defined colon cancer antigen 3                                                                     | SDCCAG3  | 721750    |
| Serpin peptidase inhibitor, clade G (C1 inhibitor), member 1                                                     | SERPING1 | 703928    |
| Serpin peptidase inhibitor, clade I (neuroserpin), member 1                                                      | SERPINI1 | 699483    |
| SERPINE1 mrna binding protein 1                                                                                  | SERBP1   | 700797    |
| Serum amyloid A like 1                                                                                           | SAAL1    | 695747    |
| Sestrin 1                                                                                                        | SESN1    | 700232    |
| SET and MYND domain containing 2                                                                                 | SMYD2    | 709375    |
| SET and MYND domain containing 3                                                                                 | SMYD3    | 703402    |
| SET domain containing 2                                                                                          | SETD2    | 711825    |
| SET domain containing 4                                                                                          | SETD4    | 696003    |
| SET domain containing 5                                                                                          | SETD5    | 704174    |
| SET domain containing 9                                                                                          | SETD9    | 708019    |
| SFI1 centrin binding protein                                                                                     | SFI1     | 716833    |
| SFT2 domain containing 3                                                                                         | SFT2D3   | 699830    |
| SGT1 homolog, MIS12 kinetochore complex assembly cochaperone                                                     | SUGT1    | 694046    |



|                                                                     |          |           |
|---------------------------------------------------------------------|----------|-----------|
| SH2B adaptor protein 2                                              | SH2B2    | 714861    |
| SH3 and multiple ankyrin repeat domains 2                           | SHANK2   | 708192    |
| SH3 domain binding glutamate-rich protein                           | SH3BGR   | 722581    |
| SH3 domain containing ring finger 1                                 | SH3RF1   | 694082    |
| SH3-domain binding protein 1                                        | SH3BP1   | 700647    |
| SH3-domain binding protein 4                                        | SH3BP4   | 693393    |
| SH3-domain GRB2-like endophilin B1                                  | SH3GLB1  | 712393    |
| SHC (Src homology 2 domain containing) transforming protein 1       | SHC1     | 718982    |
| Shootin 1                                                           | SHTN1    | 700636    |
| Shroom family member 3                                              | SHROOM3  | 699613    |
| Siah E3 ubiquitin protein ligase 1                                  | SIAH1    | 716629    |
| Sialic acid binding Ig-like lectin 10                               | SIGLEC10 | 719648    |
| Sialic acid binding Ig-like lectin 5                                | SIGLEC5  | 719730    |
| Sideroflexin 1                                                      | SFXN1    | 695107    |
| Sideroflexin 2                                                      | SFXN2    | 713841    |
| Sideroflexin 4                                                      | SFXN4    | 702765    |
| Sigma non-opioid intracellular receptor 1                           | SIGMAR1  | 700469    |
| Signal peptidase complex subunit 1                                  | SPCS1    | 696426    |
| Signal peptidase complex subunit 2                                  | SPCS2    | 694179    |
| Signal peptide, CUB domain, EGF-like 2                              | SCUBE2   | 708152    |
| Signal recognition particle 68kda                                   | SRP68    | 705568    |
| Signal sequence receptor, alpha                                     | SSR1     | 693818    |
| Signal sequence receptor, beta (translocon-associated protein beta) | SSR2     | 719383    |
| Signal sequence receptor, delta                                     | SSR4     | 697266    |
| Sin3A associated protein 18kda                                      | SAP18    | 703078    |
| Sin3A associated protein 25kda                                      | SAP25    | 106997575 |
| Sin3A associated protein 30kda                                      | SAP30    | 696519    |
| Single-stranded DNA binding protein 1, mitochondrial                | SSBP1    | 694459    |
| SIVA1, apoptosis-inducing factor                                    | SIVA1    | 706688    |
| Sjogren syndrome nuclear autoantigen 1                              | SSNA1    | 706507    |
| SKI-like proto-oncogene                                             | SKIL     | 696680    |
| SLIT and NTRK like family member 1                                  | SLITRK1  | 699217    |
| SMAD family member 4                                                | SMAD4    | 701803    |
| Smad nuclear interacting protein 1                                  | SNIP1    | 713733    |
| Small integral membrane protein 15                                  | SMIM15   | 693623    |
| Small integral membrane protein 19                                  | SMIM19   | 705371    |
| Small nuclear ribonucleoprotein D1 polypeptide                      | SNRPD1   | 698965    |
| Small nuclear ribonucleoprotein D2 polypeptide                      | SNRPD2   | 715183    |
| Small nuclear ribonucleoprotein polypeptide B                       | SNRPB2   | 695387    |
| Small nuclear ribonucleoprotein polypeptide E                       | SNRPE    | 701418    |
| Small nuclear ribonucleoprotein polypeptide G                       | SNRPG    | 702586    |
| Small nuclear ribonucleoprotein polypeptides B and B1               | SNRPB    | 716578    |
| Small nuclear ribonucleoprotein, U11/U12 35kda subunit              | SNRNP35  | 702933    |
| Small nuclear ribonucleoprotein, U4/U6.U5 27kda subunit             | SNRNP27  | 708670    |
| Small ubiquitin-like modifier 1                                     | SUMO1    | 703644    |
| Small ubiquitin-like modifier 1                                     | SUMO1    | 703644    |
| SMG7 nonsense mediated mrna decay factor                            | SMG7     | 717603    |
| SMG8 nonsense mediated mrna decay factor                            | SMG8     | 711172    |

|                                                                                             |          |        |
|---------------------------------------------------------------------------------------------|----------|--------|
| Smoothelin                                                                                  | SMTN     | 716424 |
| SMYD family member 5                                                                        | SMYD5    | 705926 |
| SNAP-associated protein                                                                     | SNAPIN   | 715546 |
| SNRPN upstream reading frame                                                                | SNURF    | 711028 |
| Sodium channel modifier 1                                                                   | SCNM1    | 709922 |
| Sodium channel, non voltage gated 1 beta subunit                                            | SCNN1B   | 700093 |
| Solute carrier family 16 member 11                                                          | SLC16A11 | 721775 |
| Solute carrier family 18 (vesicular monoamine transporter), member 2                        | SLC18A2  | 701133 |
| Solute carrier family 2 (facilitated glucose transporter), member 13                        | SLC2A13  | 697822 |
| Solute carrier family 2 (facilitated glucose transporter), member 3                         | SLC2A3   | 715915 |
| Solute carrier family 20 (phosphate transporter), member 1                                  | SLC20A1  | 699462 |
| Solute carrier family 22 (organic anion transporter), member 6                              | SLC22A6  | 718377 |
| Solute carrier family 22 (organic cation/carnitine transporter), member 5                   | SLC22A5  | 707590 |
| Solute carrier family 22 member 17                                                          | SLC22A17 | 713765 |
| Solute carrier family 22 member 18                                                          | SLC22A18 | 721230 |
| Solute carrier family 25 (aspartate/glutamate carrier), member 12                           | SLC25A12 | 695173 |
| Solute carrier family 25 (carnitine/acylcarnitine translocase), member 20                   | SLC25A20 | 709029 |
| Solute carrier family 25 (mitochondrial carrier; adenine nucleotide translocator), member 5 | SLC25A5  | 693502 |
| Solute carrier family 25 (mitochondrial carrier; phosphate carrier), member 24              | SLC25A24 | 694803 |
| Solute carrier family 25 (mitochondrial carrier; phosphate carrier), member 24              | SLC25A24 | 694803 |
| Solute carrier family 25 (mitochondrial carrier; phosphate carrier), member 25              | SLC25A25 | 698216 |
| Solute carrier family 25 (mitochondrial iron transporter), member 28                        | SLC25A28 | 710002 |
| Solute carrier family 25 (S-adenosylmethionine carrier), member 26                          | SLC25A26 | 697960 |
| Solute carrier family 25 member 41                                                          | SLC25A41 | 702790 |
| Solute carrier family 25 member 46                                                          | SLC25A46 | 705968 |
| Solute carrier family 26 (anion exchanger), member 8                                        | SLC26A8  | 719049 |
| Solute carrier family 35 (adenosine 3'-phospho 5'-phosphosulfate transporter), member B3    | SLC35B3  | 698416 |
| Solute carrier family 35 (UDP-galactose transporter), member A2                             | SLC35A2  | 711587 |
| Solute carrier family 35 (UDP-glca/UDP-galnac transporter), member D1                       | SLC35D1  | 700175 |
| Solute carrier family 35 member A5                                                          | SLC35A5  | 708401 |
| Solute carrier family 35 member B1                                                          | SLC35B1  | 699953 |
| Solute carrier family 37 (glucose-6-phosphate transporter), member 4                        | SLC37A4  | 702269 |
| Solute carrier family 38 member 1                                                           | SLC38A1  | 702135 |
| Solute carrier family 38 member 6                                                           | SLC38A6  | 704017 |
| Solute carrier family 39 (zinc transporter), member 13                                      | SLC39A13 | 713420 |
| Solute carrier family 4 (anion exchanger), member 1,                                        | SLC4A1AP | 701783 |

|                                                                                               |          |           |
|-----------------------------------------------------------------------------------------------|----------|-----------|
| adaptor protein                                                                               |          |           |
| Solute carrier family 4 (anion exchanger), member 2                                           | SLC4A2   | 713966    |
| Solute carrier family 4, sodium borate transporter, member 11                                 | SLC4A11  | 718393    |
| Solute carrier family 41 member 3                                                             | SLC41A3  | 716921    |
| Solute carrier family 44 member 3                                                             | SLC44A3  | 714768    |
| Solute carrier family 44 member 4                                                             | SLC44A4  | 715779    |
| Solute carrier family 46 member 3                                                             | SLC46A3  | 712056    |
| Solute carrier family 50 (sugar efflux transporter), member 1                                 | SLC50A1  | 717424    |
| Solute carrier family 6 (neurotransmitter transporter), member 8                              | SLC6A8   | 698307    |
| Solute carrier family 7 (amino acid transporter light chain, L system), member 8              | SLC7A8   | 713511    |
| Solute carrier family 9, subfamily A (NHE3, cation proton antiporter 3), member 3 regulator 2 | SLC9A3R2 | 694658    |
| Solute carrier family 9, subfamily A (NHE6, cation proton antiporter 6), member 6             | SLC9A6   | 710429    |
| Solute carrier organic anion transporter family member 2B1                                    | SLCO2B1  | 694829    |
| SON DNA binding protein                                                                       | SON      | 704712    |
| Sorting nexin 1                                                                               | SNX1     | 706544    |
| Sorting nexin 11                                                                              | SNX11    | 696913    |
| Sorting nexin 13                                                                              | SNX13    | 714019    |
| Sorting nexin 14                                                                              | SNX14    | 696632    |
| Sorting nexin 2                                                                               | SNX2     | 700507    |
| Sorting nexin 3                                                                               | SNX3     | 700989    |
| Sorting nexin 33                                                                              | SNX33    | 706309    |
| Sorting nexin 4                                                                               | SNX4     | 716049    |
| SOS Ras/Rho guanine nucleotide exchange factor 2                                              | SOS2     | 705601    |
| SP110 nuclear body protein                                                                    | SP110    | 714244    |
| Sp2 transcription factor                                                                      | SP2      | 694834    |
| Sp3 transcription factor                                                                      | SP3      | 699901    |
| SPARC like 1                                                                                  | SPARCL1  | 701468    |
| SPARC related modular calcium binding 1                                                       | SMOC1    | 712994    |
| Spastic paraplegia 11 (autosomal recessive)                                                   | SPG11    | 712221    |
| Spastic paraplegia 21 (autosomal recessive, Mast syndrome)                                    | SPG21    | 712815    |
| Spectrin, beta, non-erythrocytic 1                                                            | SPTBN1   | 716794    |
| Spen family transcriptional repressor                                                         | SPEN     | 696205    |
| Sperm acrosome associated 1                                                                   | SPACA1   | 699611    |
| Sperm antigen with calponin homology and coiled-coil domains 1-like                           | SPECC1L  | 707641    |
| Sperm associated antigen 5                                                                    | SPAG5    | 709400    |
| Sperm flagellar 1                                                                             | SPEF1    | 717547    |
| Spermatid perinuclear RNA binding protein                                                     | STRBP    | 695402    |
| Spermatogenesis associated 2-like                                                             | SPATA2L  | 699974    |
| Spermatogenesis associated 5-like 1                                                           | SPATA5L1 | 713376    |
| Spermatogenesis associated 7                                                                  | SPATA7   | 693836    |
| Spermatogenesis associated, serine rich 2 like                                                | SPATS2L  | 699458    |
| Spermidine/spermine N1-acetyltransferase 1                                                    | SAT1     | 697884    |
| Spermine synthase                                                                             | SMS      | 698179    |
| S-phase kinase-associated protein 1                                                           | SKP1     | 100423634 |

|                                                                                              |          |           |
|----------------------------------------------------------------------------------------------|----------|-----------|
| Sphingomyelin phosphodiesterase 2                                                            | SMPD2    | 698865    |
| Spindle and kinetochore associated complex subunit 2                                         | SKA2     | 711092    |
| Splicing factor 3a subunit 2                                                                 | SF3A2    | 721469    |
| Splicing factor 3b subunit 5                                                                 | SF3B5    | 699863    |
| Splicing factor 3b, subunit 1, 155kda                                                        | SF3B1    | 697773    |
| Splicing factor 3b, subunit 4, 49kda                                                         | SF3B4    | 705655    |
| Split hand/foot malformation (ectrodactyly) type 1                                           | SHFM1    | 698349    |
| SPRY domain containing 4                                                                     | SPRYD4   | 713037    |
| SPT4 homolog, DSIF elongation factor subunit                                                 | SUPT4H1  | 710214    |
| Squamous cell carcinoma antigen recognized by T-cells 3                                      | SART3    | 705552    |
| Src-like-adaptor                                                                             | SLA      | 697377    |
| Src-related kinase lacking C-terminal regulatory tyrosine and N-terminal myristylation sites | SRMS     | 719587    |
| SRP receptor alpha subunit                                                                   | SRPRA    | 714215    |
| SR-related CTD-associated factor 11                                                          | SCAF11   | 701894    |
| SRSF protein kinase 1                                                                        | SRPK1    | 719039    |
| SRY-box 11                                                                                   | SOX11    | 707983    |
| SRY-box 13                                                                                   | SOX13    | 700802    |
| SRY-box 21                                                                                   | SOX21    | 695074    |
| SSU72 homolog, RNA polymerase II CTD phosphatase                                             | SSU72    | 702348    |
| ST3 beta-galactoside alpha-2,3-sialyltransferase 4                                           | ST3GAL4  | 717792    |
| ST3 beta-galactoside alpha-2,3-sialyltransferase 5                                           | ST3GAL5  | 696842    |
| Staphylococcal nuclease and tudor domain containing 1                                        | SND1     | 699542    |
| Star related lipid transfer domain containing 13                                             | STARD13  | 714104    |
| Star related lipid transfer domain containing 3                                              | STARD3   | 697212    |
| Star related lipid transfer domain containing 5                                              | STARD5   | 713308    |
| STARD3 N-terminal like                                                                       | STARD3NL | 705212    |
| Stathmin 1                                                                                   | STMN1    | 719733    |
| Staufen double-stranded RNA binding protein 1                                                | STAU1    | 704197    |
| STE20-related kinase adaptor alpha                                                           | STRADA   | 717927    |
| STE20-related kinase adaptor beta                                                            | STRADB   | 641449    |
| STIP1 homology and U-box containing protein 1, E3 ubiquitin protein ligase                   | STUB1    | 697105    |
| Stomatin like 1                                                                              | STOML1   | 700510    |
| Stomatin like 2                                                                              | STOML2   | 698458    |
| Stonin 1                                                                                     | STON1    | 106992942 |
| Storkhead box 2                                                                              | STOX2    | 693692    |
| Stratifin                                                                                    | SFN      | 715055    |
| Strawberry notch homolog 2 (Drosophila)                                                      | SBNO2    | 721186    |
| Striatin interacting protein 1                                                               | STRIP1   | 700799    |
| Stromal cell derived factor 4                                                                | SDF4     | 699804    |
| Stromal cell-derived factor 2                                                                | SDF2     | 716189    |
| Structural maintenance of chromosomes 4                                                      | SMC4     | 702615    |
| Structure specific recognition protein 1                                                     | SSRP1    | 706614    |
| STT3A, subunit of the oligosaccharyltransferase complex (catalytic)                          | STT3A    | 717056    |
| SUB1 homolog, transcriptional regulator                                                      | SUB1     | 701045    |
| Succinate dehydrogenase complex assembly factor 2                                            | SDHAF2   | 693401    |
| Succinate dehydrogenase complex subunit A, flavoprotein (Fp)                                 | SDHA     | 708018    |

|                                                                                                   |         |           |
|---------------------------------------------------------------------------------------------------|---------|-----------|
| Succinate dehydrogenase complex subunit B, iron sulfur (Ip)                                       | SDHB    | 699810    |
| Succinate dehydrogenase complex, subunit D, integral membrane protein                             | SDHD    | 711326    |
| Succinate-coa ligase, GDP-forming, beta subunit                                                   | SUCLG2  | 697454    |
| Sulfatase 2                                                                                       | SULF2   | 715937    |
| Sulfiredoxin 1                                                                                    | SRXN1   | 714997    |
| SUMO1/sentrin specific peptidase 5                                                                | SEN5    | 710223    |
| SUMO1/sentrin specific peptidase 6                                                                | SEN6    | 716554    |
| SUMO1/sentrin specific peptidase 7                                                                | SEN7    | 701453    |
| SUN domain containing ossification factor                                                         | SUCO    | 705776    |
| Superkiller viralicidic activity 2-like 2 (S. Cerevisiae)                                         | SKIV2L2 | 706419    |
| Superoxide dismutase 1, soluble                                                                   | SOD1    | 574096    |
| Supervillin                                                                                       | SVIL    | 695267    |
| Suppression of tumorigenicity 13 (colon carcinoma) (Hsp70 interacting protein)                    | ST13    | 705664    |
| Suppression of tumorigenicity 5                                                                   | ST5     | 705444    |
| Suppression of tumorigenicity 7                                                                   | ST7     | 704776    |
| Suppressor of cytokine signaling 6                                                                | SOCS6   | 704108    |
| Suppressor of fused homolog (Drosophila)                                                          | SUFU    | 713576    |
| Surfactant associated 2                                                                           | SFTA2   | 714397    |
| Surfeit 4                                                                                         | SURF4   | 100429963 |
| SURP and G-patch domain containing 1                                                              | SUGP1   | 719772    |
| Survival motor neuron domain containing 1                                                         | SMNDC1  | 694761    |
| Survival of motor neuron 1, telomeric                                                             | SMN1    | 677703    |
| SWI/SNF related, matrix associated, actin dependent regulator of chromatin, subfamily a, member 2 | SMARCA2 | 696973    |
| SWI/SNF related, matrix associated, actin dependent regulator of chromatin, subfamily a, member 5 | SMARCA5 | 700614    |
| SWI/SNF related, matrix associated, actin dependent regulator of chromatin, subfamily b, member 1 | SMARCB1 | 699190    |
| SWI/SNF related, matrix associated, actin dependent regulator of chromatin, subfamily e, member 1 | SMARCE1 | 701310    |
| SWIM-type zinc finger 7 associated protein 1                                                      | SWSAP1  | 716529    |
| SWT1, RNA endoribonuclease homolog                                                                | SWT1    | 714083    |
| SYF2 pre-mrna-splicing factor                                                                     | SYF2    | 719564    |
| Synaptogyrin 1                                                                                    | SYNGR1  | 100427479 |
| Synaptophysin-like 1                                                                              | SYPL1   | 698350    |
| Synaptosome associated protein 47kda                                                              | SNAP47  | 696700    |
| Synaptotagmin binding, cytoplasmic RNA interacting protein                                        | SYNCRIP | 696756    |
| Synaptotagmin VII                                                                                 | SYT7    | 722368    |
| Syndecan binding protein                                                                          | SDCBP   | 698381    |
| Synemin                                                                                           | SYNM    | 717194    |
| Synovial sarcoma translocation gene on chromosome 18-like 2                                       | SS18L2  | 716387    |
| Syntaxin 18                                                                                       | STX18   | 712216    |
| Syntaxin 1B                                                                                       | STX1B   | 714251    |
| Syntaxin binding protein 3                                                                        | STXBP3  | 699144    |
| Syntaxin binding protein 6 (amisyn)                                                               | STXBP6  | 715357    |
| Syntrophin, beta 2 (dystrophin-associated protein A1, 59kda, basic                                | SNTB2   | 704333    |

|                                                                                             |         |        |
|---------------------------------------------------------------------------------------------|---------|--------|
| component 2)                                                                                |         |        |
| Synuclein beta                                                                              | SNCB    | 697484 |
| Tafazzin                                                                                    | TAZ     | 574297 |
| TAM41, mitochondrial translocator assembly and maintenance protein, homolog (S. Cerevisiae) | C3orf31 | 695998 |
| TANK-binding kinase 1                                                                       | TBK1    | 717427 |
| TAO kinase 2                                                                                | TAOK2   | 707777 |
| TAR (HIV-1) RNA binding protein 1                                                           | TARBP1  | 712397 |
| TAR (HIV-1) RNA binding protein 2                                                           | TARBP2  | 703294 |
| Target of EGR1, member 1 (nuclear)                                                          | TOE1    | 705770 |
| Taspase 1                                                                                   | TASP1   | 694028 |
| Taste 1 receptor member 1                                                                   | TAS1R1  | 720987 |
| Taste 2 receptor member 16                                                                  | TAS2R16 | 695211 |
| TATA-box binding protein associated factor 1                                                | TAF1    | 698800 |
| TATA-box binding protein associated factor 10                                               | TAF10   | 710022 |
| TATA-box binding protein associated factor 12                                               | TAF12   | 717135 |
| TATA-box binding protein associated factor 2                                                | TAF2    | 702411 |
| TATA-box binding protein associated factor 5                                                | TAF5    | 714558 |
| TATA-box binding protein associated factor 5 like                                           | TAF5L   | 693770 |
| TATA-box binding protein associated factor 7                                                | TAF7    | 574347 |
| TATA-box binding protein associated factor 9                                                | TAF9    | 700239 |
| TATA-box binding protein associated factor, RNA polymerase I, D                             | TAF1D   | 696602 |
| Tatd dnase domain containing 1                                                              | TATDN1  | 706095 |
| Tax1 (human T-cell leukemia virus type I) binding protein 1                                 | TAX1BP1 | 698103 |
| TBC1 domain family member 15                                                                | TBC1D15 | 718743 |
| TBC1 domain family member 19                                                                | TBC1D19 | 694865 |
| TBC1 domain family member 25                                                                | TBC1D25 | 710596 |
| TBC1 domain family member 9                                                                 | TBC1D9  | 702230 |
| T-box 21                                                                                    | TBX21   | 694044 |
| T-cell acute lymphocytic leukemia 2                                                         | TAL2    | 712138 |
| TCF3 (E2A) fusion partner (in childhood Leukemia)                                           | TFPT    | 720296 |
| Teashirt zinc finger homeobox 1                                                             | TSHZ1   | 703018 |
| TELO2 interacting protein 1                                                                 | TTI1    | 699930 |
| TELO2 interacting protein 2                                                                 | TTI2    | 696776 |
| Telomeric repeat binding factor 2, interacting protein                                      | TERF2IP | 712149 |
| Tensin 4                                                                                    | TNS4    | 701075 |
| TERF1 (TRF1)-interacting nuclear factor 2                                                   | TINF2   | 715812 |
| Testin LIM domain protein                                                                   | TES     | 706879 |
| Testis expressed 10                                                                         | TEX10   | 714536 |
| Testis expressed 28                                                                         | TEX28   | 699141 |
| Testis expressed 30                                                                         | TEX30   | 701917 |
| Tetraspanin 3                                                                               | TSPAN3  | 708428 |
| Tetraspanin 8                                                                               | TSPAN8  | 718622 |
| Tetratricopeptide repeat domain 1                                                           | TTC1    | 695225 |
| Tetratricopeptide repeat domain 14                                                          | TTC14   | 710895 |
| Tetratricopeptide repeat domain 27                                                          | TTC27   | 707021 |
| Tetratricopeptide repeat domain 7B                                                          | TTC7B   | 696029 |
| Tetratricopeptide repeat domain 9C                                                          | TTC9C   | 718583 |

|                                                                            |          |           |
|----------------------------------------------------------------------------|----------|-----------|
| TGF-beta activated kinase 1/MAP3K7 binding protein 1                       | TAB1     | 703409    |
| TGF-beta activated kinase 1/MAP3K7 binding protein 2                       | TAB2     | 696875    |
| THAP domain containing 7                                                   | THAP7    | 696208    |
| Thiopurine S-methyltransferase                                             | TPMT     | 704564    |
| Thioredoxin domain containing 11                                           | TXNDC11  | 711826    |
| Thioredoxin domain containing 12 (endoplasmic reticulum)                   | TXNDC12  | 712891    |
| Thioredoxin domain containing 9                                            | TXNDC9   | 709303    |
| Thioredoxin like 1                                                         | TXNL1    | 695194    |
| Thioredoxin like 4A                                                        | TXNL4A   | 698969    |
| Thioredoxin-related transmembrane protein 1                                | TMX1     | 707057    |
| Thiosulfate sulfurtransferase (rhodanese)                                  | TST      | 698021    |
| THO complex 1                                                              | THOC1    | 697954    |
| THO complex 3                                                              | THOC3    | 695561    |
| THO complex 6                                                              | THOC6    | 700217    |
| Thrombospondin 3                                                           | THBS3    | 717572    |
| THUMP domain containing 2                                                  | THUMPD2  | 712045    |
| Thymosin beta 4, X-linked                                                  | TMSB4X   | 710959    |
| Thyroid hormone receptor interactor 11                                     | TRIP11   | 697489    |
| Thyroid hormone receptor interactor 12                                     | TRIP12   | 710560    |
| Thyroid hormone receptor interactor 4                                      | TRIP4    | 707263    |
| TIA1 cytotoxic granule-associated RNA binding protein                      | TIA1     | 702366    |
| Tigger transposable element derived 2                                      | TIGD2    | 100427994 |
| TIMELESS interacting protein                                               | TIPIN    | 710328    |
| Titin-cap                                                                  | TCAP     | 697327    |
| TM2 domain containing 2                                                    | TM2D2    | 701007    |
| TNF receptor associated factor 2                                           | TRAF2    | 708391    |
| TNF receptor associated factor 7                                           | TRAF7    | 695415    |
| TNF receptor-associated protein 1                                          | TRAP1    | 706234    |
| Tocopherol (alpha) transfer protein-like                                   | TTPAL    | 712620    |
| Topoisomerase (DNA) I                                                      | TOP1     | 697300    |
| Topoisomerase (DNA) II alpha                                               | TOP2A    | 700707    |
| Topoisomerase (DNA) II beta                                                | TOP2B    | 677709    |
| Topoisomerase (DNA) II binding protein 1                                   | TOPBP1   | 719054    |
| Topoisomerase I binding, arginine/serine-rich, E3 ubiquitin protein ligase | TOPORS   | 703930    |
| Torsin A interacting protein 2                                             | TOR1AIP2 | 716691    |
| Torsin family 1, member A (torsin A)                                       | TOR1A    | 722520    |
| Torsin family 2, member A                                                  | TOR2A    | 700203    |
| TP53 induced glycolysis regulatory phosphatase                             | TIGAR    | 721886    |
| TPX2, microtubule-associated                                               | TPX2     | 712961    |
| TRAF family member associated NFKB activator                               | TANK     | 700942    |
| TRAF3 interacting protein 2                                                | TRAF3IP2 | 697530    |
| Trafficking protein particle complex 11                                    | TRAPPC11 | 702066    |
| Trafficking protein particle complex 3                                     | TRAPPC3  | 713705    |
| Trafficking protein particle complex 4                                     | TRAPPC4  | 702469    |
| Trans-2,3-enoyl-coa reductase                                              | TECR     | 718928    |
| Transaldolase 1                                                            | TALDO1   | 720828    |
| Transcription elongation factor A (SII)-like 1                             | TCEAL1   | 696826    |

|                                                                               |         |           |
|-------------------------------------------------------------------------------|---------|-----------|
| Transcription elongation factor A (SII)-like 2                                | TCEAL2  | 705419    |
| Transcription elongation factor A (SII)-like 7                                | TCEAL7  | 695831    |
| Transcription elongation factor A (SII)-like 8                                | TCEAL8  | 695496    |
| Transcription elongation factor B (SIII), polypeptide 1<br>(15kda, elongin C) | TCEB1   | 698922    |
| Transcription elongation regulator 1                                          | TCERG1  | 707912    |
| Transcription factor A, mitochondrial                                         | TFAM    | 701368    |
| Transcription factor B1, mitochondrial                                        | TFB1M   | 701830    |
| Transcription factor CP2                                                      | TFCP2   | 574399    |
| Transcription factor Dp-2 (E2F dimerization partner 2)                        | TFDP2   | 714655    |
| Transcription factor EC                                                       | TFEC    | 704124    |
| Transducin (beta)-like 1 X-linked receptor 1                                  | TBL1XR1 | 712740    |
| Transducin (beta)-like 2                                                      | TBL2    | 716515    |
| Transducin (beta)-like 3                                                      | TBL3    | 693864    |
| Transducin like enhancer of split 1                                           | TLE1    | 707336    |
| Transferrin receptor                                                          | TFRC    | 711568    |
| Transformer 2 alpha homolog (Drosophila)                                      | TRA2A   | 574247    |
| Transformer 2 beta homolog (Drosophila)                                       | TRA2B   | 574337    |
| Transforming growth factor beta regulator 4                                   | TBRG4   | 697717    |
| Transforming, acidic coiled-coil containing protein 2                         | TACC2   | 705497    |
| Transforming, acidic coiled-coil containing protein 3                         | TACC3   | 712898    |
| Transglutaminase 7                                                            | TGM7    | 712676    |
| Transient receptor potential cation channel, subfamily M, member 5            | TRPM5   | 705070    |
| Transient receptor potential cation channel, subfamily V, member 4            | TRPV4   | 709605    |
| Translation machinery associated 7 homolog                                    | TMA7    | 710220    |
| Translational activator of mitochondrially encoded cytochrome c<br>oxidase I  | TACO1   | 717828    |
| Translocase of inner mitochondrial membrane 10 homolog (yeast)                | TIMM10  | 705930    |
| Translocase of inner mitochondrial membrane 17 homolog A (yeast)              | TIMM17A | 707001    |
| Translocase of inner mitochondrial membrane 17 homolog B (yeast)              | TIMM17B | 714895    |
| Translocase of inner mitochondrial membrane 21 homolog (yeast)                | TIMM21  | 694581    |
| Translocase of inner mitochondrial membrane 23 homolog (yeast)                | TIMM23  | 709594    |
| Translocase of inner mitochondrial membrane 44 homolog (yeast)                | TIMM44  | 709800    |
| Translocase of inner mitochondrial membrane 8 homolog B (yeast)               | TIMM8B  | 711249    |
| Translocase of inner mitochondrial membrane domain containing 1               | TIMMDC1 | 712414    |
| Translocase of outer mitochondrial membrane 22 homolog (yeast)                | TOMM22  | 701286    |
| Translocase of outer mitochondrial membrane 40 homolog (yeast)                | TOMM40  | 713297    |
| Translocase of outer mitochondrial membrane 6 homolog (yeast)                 | TOMM6   | 100423260 |
| Translocase of outer mitochondrial membrane 70 homolog A<br>(S. Cerevisiae)   | TOMM70A | 700347    |
| Translocated promoter region, nuclear basket protein                          | TPR     | 713910    |
| Transmembrane 4 L six family member 5                                         | TM4SF5  | 709844    |
| Transmembrane 6 superfamily member 2                                          | TM6SF2  | 719756    |
| Transmembrane 9 superfamily member 1                                          | TM9SF1  | 715472    |
| Transmembrane and coiled-coil domains 4                                       | TMCO4   | 703851    |
| Transmembrane and ubiquitin-like domain containing 2                          | TMUB2   | 714541    |
| Transmembrane BAX inhibitor motif containing 6                                | TMBIM6  | 677702    |
| Transmembrane p24 trafficking protein 1                                       | TMED1   | 713618    |



|                                                                        |          |           |
|------------------------------------------------------------------------|----------|-----------|
| Transmembrane p24 trafficking protein 3                                | TMED3    | 711993    |
| Transmembrane p24 trafficking protein 4                                | TMED4    | 699105    |
| Transmembrane p24 trafficking protein 7                                | TMED7    | 100533189 |
| Transmembrane phosphoinositide 3-phosphatase and tensin homolog 2      | TPTE2    | 704870    |
| Transmembrane protease, serine 13                                      | TMPRSS13 | 698586    |
| Transmembrane protein 104                                              | TMEM104  | 698592    |
| Transmembrane protein 106C                                             | TMEM106C | 704741    |
| Transmembrane protein 115                                              | TMEM115  | 702164    |
| Transmembrane protein 123                                              | TMEM123  | 702833    |
| Transmembrane protein 125                                              | TMEM125  | 699920    |
| Transmembrane protein 126A                                             | TMEM126A | 702831    |
| Transmembrane protein 126B                                             | TMEM126B | 702719    |
| Transmembrane protein 132A                                             | TMEM132A | 695291    |
| Transmembrane protein 135                                              | TMEM135  | 704963    |
| Transmembrane protein 138                                              | TMEM138  | 693905    |
| Transmembrane protein 141                                              | TMEM141  | 721687    |
| Transmembrane protein 14A                                              | TMEM14A  | 708829    |
| Transmembrane protein 14C                                              | TMEM14C  | 697976    |
| Transmembrane protein 165                                              | TMEM165  | 696262    |
| Transmembrane protein 167A                                             | TMEM167A | 712218    |
| Transmembrane protein 168                                              | TMEM168  | 702972    |
| Transmembrane protein 179B                                             | TMEM179B | 718518    |
| Transmembrane protein 183A                                             | TMEM183A | 704195    |
| Transmembrane protein 204                                              | TMEM204  | 701926    |
| Transmembrane protein 205                                              | TMEM205  | 714330    |
| Transmembrane protein 208                                              | TMEM208  | 697228    |
| Transmembrane protein 216                                              | TMEM216  | 693655    |
| Transmembrane protein 218                                              | TMEM218  | 100430362 |
| Transmembrane protein 243                                              | TMEM243  | 706405    |
| Transmembrane protein 245                                              | TMEM245  | 710299    |
| Transmembrane protein 254                                              | TMEM254  | 701130    |
| Transmembrane protein 261                                              | TMEM261  | 716818    |
| Transmembrane protein 30A                                              | TMEM30A  | 717907    |
| Transmembrane protein 33                                               | TMEM33   | 702063    |
| Transmembrane protein 39B                                              | TMEM39B  | 706700    |
| Transmembrane protein 42                                               | TMEM42   | 714654    |
| Transmembrane protein 45B                                              | TMEM45B  | 718735    |
| Transmembrane protein 47                                               | TMEM47   | 693975    |
| Transmembrane protein 5                                                | TMEM5    | 717102    |
| Transmembrane protein 50A                                              | TMEM50A  | 100424313 |
| Transmembrane protein 59                                               | TMEM59   | 714942    |
| Transmembrane protein 60                                               | TMEM60   | 693679    |
| Transmembrane protein 94                                               | TMEM94   | 702374    |
| Transmembrane protein with EGF-like and two follistatin-like domains 1 | TMEFF1   | 714325    |
| Transmembrane protein, adipocyte associated 1                          | TPRA1    | 707221    |
| Transporter 1, ATP-binding cassette, sub-family B (MDR/TAP)            | TAP1     | 717726    |

|                                                                              |         |           |
|------------------------------------------------------------------------------|---------|-----------|
| Tribbles pseudokinase 2                                                      | TRIB2   | 710966    |
| Trinucleotide repeat containing 6A                                           | TNRC6A  | 701680    |
| Triokinase/FMN cyclase                                                       | TKFC    | 694117    |
| Tripartite motif containing 11                                               | TRIM11  | 694150    |
| Tripartite motif containing 24                                               | TRIM24  | 710229    |
| Tripartite motif containing 27                                               | TRIM27  | 706129    |
| Tripartite motif containing 37                                               | TRIM37  | 710934    |
| Tripartite motif containing 41                                               | TRIM41  | 708426    |
| Tripartite motif containing 8                                                | TRIM8   | 713701    |
| TRK-fused gene                                                               | TFG     | 700972    |
| Trna 5-methylaminomethyl-2-thiouridylate methyltransferase                   | TRMU    | 714268    |
| Trna isopentenyltransferase 1                                                | TRIT1   | 716422    |
| Trna methyltransferase 11 homolog                                            | TRMT11  | 712712    |
| Trna methyltransferase 11-2 homolog (S. Cerevisiae)                          | TRMT112 | 717676    |
| Trna methyltransferase 6                                                     | TRMT6   | 718229    |
| Trna methyltransferase O                                                     | TRMO    | 715609    |
| Trna phosphotransferase 1                                                    | TRPT1   | 717911    |
| Trna splicing endonuclease subunit 15                                        | TSEN15  | 717481    |
| Tropomodulin 4                                                               | TMOD4   | 709732    |
| Tropomyosin 2 (beta)                                                         | TPM2    | 696604    |
| Tropomyosin 3                                                                | TPM3    | 716336    |
| Trub pseudouridine (psi) synthase family member 2                            | TRUB2   | 717619    |
| Tryptase gamma 1                                                             | TPSG1   | 100425751 |
| TSC22 domain family member 1                                                 | TSC22D1 | 701076    |
| TSPY-like 4                                                                  | TSPYL4  | 716137    |
| TSSK6 activating co-chaperone                                                | TSACC   | 719490    |
| Tu translation elongation factor, mitochondrial                              | TUFM    | 705462    |
| Tubulin alpha 1a                                                             | TUBA1A  | 574194    |
| Tubulin alpha 4a                                                             | TUBA4A  | 702583    |
| Tubulin folding cofactor C                                                   | TBCC    | 696997    |
| Tubulin folding cofactor E                                                   | TBCE    | 711476    |
| Tubulin gamma 1                                                              | TUBG1   | 710756    |
| Tubulin, alpha 1b                                                            | TUBA1B  | 709643    |
| Tudor domain containing 3                                                    | TDRD3   | 696228    |
| Tudor domain containing 7                                                    | TDRD7   | 641450    |
| Tumor necrosis factor (ligand) superfamily, member 12                        | TNFSF12 | 100551506 |
| Tumor protein D52-like 1                                                     | TPD52L1 | 716568    |
| Tumor protein p53 binding protein 1                                          | TP53BP1 | 710237    |
| Tumor protein, translationally-controlled 1                                  | TPT1    | 702155    |
| Tumor suppressing subtransferable candidate 1                                | TSSC1   | 707650    |
| Tumor suppressing subtransferable candidate 4                                | TSSC4   | 705185    |
| Tumor suppressor candidate 3                                                 | TUSC3   | 701123    |
| Twist family bhlh transcription factor 1                                     | TWIST1  | 574278    |
| Twist family bhlh transcription factor 2                                     | TWIST2  | 697078    |
| TWIST neighbor                                                               | TWISTNB | 707781    |
| Twisted gastrulation homolog 1 (Drosophila)                                  | TWSG1   | 705804    |
| Tyrosine 3-monooxygenase/tryptophan 5-monooxygenase activation protein, beta | YWHAB   | 717788    |

|                                                                             |        |           |
|-----------------------------------------------------------------------------|--------|-----------|
| Tyrosine 3-monooxygenase/tryptophan 5-monooxygenase activation protein, eta | YWHAH  | 717016    |
| Tyrosine hydroxylase                                                        | TH     | 721137    |
| Tyrosine kinase, non-receptor, 1                                            | TNK1   | 715180    |
| Tyrosyl-DNA phosphodiesterase 2                                             | TDP2   | 715162    |
| UBA domain containing 2                                                     | UBAC2  | 703484    |
| Ubiquilin 1                                                                 | UBQLN1 | 713525    |
| Ubiquinol-cytochrome c reductase core protein II                            | UQCRC2 | 697967    |
| Ubiquinol-cytochrome c reductase, 6.4kda subunit                            | UQCR   | 708396    |
| Ubiquinol-cytochrome c reductase, complex III subunit VII, 9.5kda           | UQCRCQ | 708950    |
| Ubiquitin A-52 residue ribosomal protein fusion product 1                   | UBA52  | 720243    |
| Ubiquitin B                                                                 | UBB    | 696110    |
| Ubiquitin conjugating enzyme E2 variant 1                                   | UBE2V1 | 100425552 |
| Ubiquitin conjugating enzyme E2A                                            | UBE2A  | 693716    |
| Ubiquitin conjugating enzyme E2D 3                                          | UBE2D3 | 710772    |
| Ubiquitin conjugating enzyme E2D 4 (putative)                               | UBE2D4 | 707831    |
| Ubiquitin conjugating enzyme E2E 3                                          | UBE2E3 | 704530    |
| Ubiquitin conjugating enzyme E2F (putative)                                 | UBE2F  | 695394    |
| Ubiquitin conjugating enzyme E2I                                            | UBE2I  | 722434    |
| Ubiquitin conjugating enzyme E2L 3                                          | UBE2L3 | 697675    |
| Ubiquitin conjugating enzyme E2O                                            | UBE2O  | 710529    |
| Ubiquitin conjugating enzyme E2Q family member 1                            | UBE2Q1 | 718733    |
| Ubiquitin C-terminal hydrolase L3                                           | UCHL3  | 697276    |
| Ubiquitin fusion degradation 1 like (yeast)                                 | UFD1L  | 711716    |
| Ubiquitin like 5                                                            | UBL5   | 711015    |
| Ubiquitin like 7                                                            | UBL7   | 702305    |
| Ubiquitin like domain containing CTD phosphatase 1                          | UBLCP1 | 694476    |
| Ubiquitin protein ligase E3 component n-recogin 7 (putative)                | UBR7   | 698882    |
| Ubiquitin protein ligase E3B                                                | UBE3B  | 707324    |
| Ubiquitin protein ligase E3D                                                | UBE3D  | 694910    |
| Ubiquitin related modifier 1                                                | URM1   | 722618    |
| Ubiquitin specific peptidase 10                                             | USP10  | 718471    |
| Ubiquitin specific peptidase 10                                             | USP10  | 718471    |
| Ubiquitin specific peptidase 13 (isopeptidase T-3)                          | USP13  | 708624    |
| Ubiquitin specific peptidase 16                                             | USP16  | 706403    |
| Ubiquitin specific peptidase 21                                             | USP21  | 719894    |
| Ubiquitin specific peptidase 25                                             | USP25  | 716923    |
| Ubiquitin specific peptidase 3                                              | USP3   | 705973    |
| Ubiquitin specific peptidase 38                                             | USP38  | 700235    |
| Ubiquitin specific peptidase 39                                             | USP39  | 696217    |
| Ubiquitin specific peptidase 47                                             | USP47  | 701660    |
| Ubiquitin specific peptidase 51                                             | USP51  | 705861    |
| Ubiquitin specific peptidase 7 (herpes virus-associated)                    | USP7   | 714625    |
| Ubiquitin specific peptidase 8                                              | USP8   | 715523    |
| Ubiquitination factor E4B                                                   | UBE4B  | 713348    |
| Ubiquitin-like modifier activating enzyme 2                                 | UBA2   | 705808    |
| Ubiquitin-like modifier activating enzyme 3                                 | UBA3   | 696493    |
| Ubiquitin-like with PHD and ring finger domains 1                           | UHRF1  | 695531    |

|                                                                           |           |           |
|---------------------------------------------------------------------------|-----------|-----------|
| U-box domain containing 5                                                 | UBOX5     | 717166    |
| UBX domain protein 11                                                     | UBXN11    | 719826    |
| UDP-Gal:betaglcnac beta 1,4- galactosyltransferase, polypeptide 3         | B4GALT3   | 719920    |
| UDP-galactose-4-epimerase                                                 | GALE      | 710553    |
| UDP-glcnac:betagal beta-1,3-N-acetylglucosaminyltransferase 2             | B3GNT2    | 693396    |
| UDP-glucose pyrophosphorylase 2                                           | UGP2      | 695178    |
| UDP-N-acetylglucosamine pyrophosphorylase 1                               | UAP1      | 720116    |
| UHRF1 binding protein 1-like                                              | UHRF1BP1L | 694816    |
| Unconventional SNARE in the ER 1 homolog (S. Cerevisiae)                  | USE1      | 718905    |
| UPF3 regulator of nonsense transcripts homolog B (yeast)                  | UPF3B     | 694247    |
| Up-regulated during skeletal muscle growth 5 homolog (mouse)              | USMG5     | 100428450 |
| Upstream binding protein 1 (LBP-1a)                                       | UBP1      | 706283    |
| Uridine monophosphate synthetase                                          | UMPS      | 715664    |
| Uronyl-2-sulfotransferase                                                 | UST       | 697355    |
| Usher syndrome 1C                                                         | USH1C     | 696911    |
| USP6 N-terminal like                                                      | USP6NL    | 694275    |
| USP6 N-terminal like                                                      | USP6NL    | 694275    |
| UTP14, U3 small nucleolar ribonucleoprotein, homolog C (yeast)            | UTP14C    | 709657    |
| UTP6 small subunit processome component                                   | UTP6      | 713361    |
| UV radiation resistance associated                                        | UVRAG     | 696601    |
| Vac14 homolog (S. Cerevisiae)                                             | VAC14     | 708741    |
| Vaccinia related kinase 1                                                 | VRK1      | 704798    |
| Vacuolar protein sorting 13 homolog C (S. Cerevisiae)                     | VPS13C    | 709080    |
| Vacuolar protein sorting 36 homolog (S. Cerevisiae)                       | VPS36     | 693290    |
| Vacuolar protein sorting 4 homolog A (S. Cerevisiae)                      | VPS4A     | 705277    |
| Vacuolar protein sorting 45 homolog (S. Cerevisiae)                       | VPS45     | 706035    |
| Vacuolar protein sorting 72 homolog (S. Cerevisiae)                       | VPS72     | 709818    |
| V-akt murine thymoma viral oncogene homolog 3                             | AKT3      | 714717    |
| Valosin containing protein lysine (K) methyltransferase                   | VCPKMT    | 705487    |
| Valyl-trna synthetase                                                     | VARS      | 715537    |
| Vascular endothelial growth factor A                                      | VEGFA     | 574209    |
| Vav guanine nucleotide exchange factor 1                                  | VAV1      | 100424246 |
| Vav guanine nucleotide exchange factor 3                                  | VAV3      | 694685    |
| VCP-interacting membrane selenoprotein                                    | VIMP      | 694752    |
| V-crk avian sarcoma virus CT10 oncogene homolog                           | CRK       | 701185    |
| Very low density lipoprotein receptor                                     | VLDLR     | 574284    |
| Vesicle associated membrane protein 7                                     | VAMP7     | 704160    |
| Vesicle transport through interaction with t-snares 1B                    | VTI1B     | 711113    |
| Vitamin K epoxide reductase complex subunit 1 like 1                      | VKORC1L1  | 697591    |
| Vitronectin                                                               | VTN       | 708499    |
| V-myc avian myelocytomatosis viral oncogene neuroblastoma derived homolog | MYCN      | 698699    |
| Voltage-dependent anion channel 1                                         | VDAC1     | 710045    |
| Voltage-dependent anion channel 2                                         | VDAC2     | 704257    |
| VPS11, CORVET/HOPS core subunit                                           | VPS11     | 702834    |
| VPS26 retromer complex component A                                        | VPS26A    | 717371    |
| VPS26 retromer complex component B                                        | VPS26B    | 694566    |
| VPS29 retromer complex component                                          | VPS29     | 709646    |

|                                                                                   |         |        |
|-----------------------------------------------------------------------------------|---------|--------|
| VPS33B interacting protein, apical-basolateral polarity regulator, spe-39 homolog | VIPAS39 | 706315 |
| VPS54 GARP complex subunit                                                        | VPS54   | 695397 |
| VPS8, CORVET complex subunit                                                      | VPS8    | 701567 |
| V-ral simian leukemia viral oncogene homolog A (ras related)                      | RALA    | 703440 |
| V-ral simian leukemia viral oncogene homolog B                                    | RALB    | 695852 |
| WD repeat containing, antisense to TP53                                           | WRAP53  | 716125 |
| WD repeat containing, antisense to TP73                                           | WRAP73  | 695276 |
| WD repeat domain 11                                                               | WDR11   | 714990 |
| WD repeat domain 12                                                               | WDR12   | 705623 |
| WD repeat domain 19                                                               | WDR19   | 698866 |
| WD repeat domain 20                                                               | WDR20   | 708533 |
| WD repeat domain 26                                                               | WDR26   | 704911 |
| WD repeat domain 3                                                                | WDR3    | 711960 |
| WD repeat domain 35                                                               | WDR35   | 716638 |
| WD repeat domain 37                                                               | WDR37   | 709975 |
| WD repeat domain 4                                                                | WDR4    | 714230 |
| WD repeat domain 41                                                               | WDR41   | 708223 |
| WD repeat domain 47                                                               | WDR47   | 696942 |
| WD repeat domain 53                                                               | WDR53   | 709710 |
| WD repeat domain 6                                                                | WDR6    | 708505 |
| WD repeat domain 61                                                               | WDR61   | 709971 |
| WD repeat domain 70                                                               | WDR70   | 706130 |
| WD repeat domain 74                                                               | WDR74   | 718460 |
| WD repeat domain 75                                                               | WDR75   | 709104 |
| WD repeat domain 77                                                               | WDR77   | 677686 |
| WD repeat domain 83 opposite strand                                               | WDR83OS | 716302 |
| WD repeat, sterile alpha motif and U-box domain containing 1                      | WDSUB1  | 699456 |
| WDYHV motif containing 1                                                          | WDYHV1  | 704686 |
| WEE1 G2 checkpoint kinase                                                         | WEE1    | 703760 |
| Werner helicase interacting protein 1                                             | WRNIP1  | 707250 |
| Williams Beuren syndrome chromosome region 22                                     | WBSCR22 | 720121 |
| Wilms tumor 1 associated protein                                                  | WTAP    | 702295 |
| Wilms tumor 1 associated protein                                                  | WTAP    | 702295 |
| Wingless-type MMTV integration site family member 11                              | WNT11   | 696845 |
| Wiskott-Aldrich syndrome-like                                                     | WASL    | 696556 |
| WSC domain containing 1                                                           | WSCD1   | 712488 |
| WW domain binding protein 1                                                       | WBP1    | 709202 |
| WW domain binding protein 11                                                      | WBP11   | 699451 |
| WW domain binding protein 2                                                       | WBP2    | 704545 |
| WW domain binding protein 5                                                       | WBP5    | 696661 |
| WW domain containing adaptor with coiled-coil                                     | WAC     | 715828 |
| WW domain containing E3 ubiquitin protein ligase 2                                | WWP2    | 705464 |
| X-box binding protein 1                                                           | XBP1    | 713863 |
| Xeroderma pigmentosum, complementation group A                                    | XPA     | 715705 |
| X-prolyl aminopeptidase (aminopeptidase P) 1, soluble                             | XPNPEP1 | 696570 |
| X-ray repair complementing defective repair in Chinese hamster cells 5            | XRCC5   | 574279 |

|                                                                        |          |           |
|------------------------------------------------------------------------|----------|-----------|
| X-ray repair complementing defective repair in Chinese hamster cells 6 | XRCC6    | 707975    |
| XRCC6 binding protein 1                                                | XRCC6BP1 | 712932    |
| Yae1 domain containing 1                                               | YAE1D1   | 703786    |
| YEATS domain containing 4                                              | YEATS4   | 718376    |
| Yip1 domain family member 1                                            | YIPF1    | 714632    |
| Yip1 domain family member 2                                            | YIPF2    | 713753    |
| Yip1 domain family member 3                                            | YIPF3    | 700228    |
| Yip1 domain family member 4                                            | YIPF4    | 706819    |
| Yip1 interacting factor homolog A ( <i>S. Cerevisiae</i> )             | YIF1A    | 714486    |
| Yippee like 3                                                          | YPEL3    | 708740    |
| Yippee like 5                                                          | YPEL5    | 704532    |
| YKT6 v-SNARE homolog ( <i>S. Cerevisiae</i> )                          | YKT6     | 699606    |
| YTH domain containing 1                                                | YTHDC1   | 709717    |
| YTH N(6)-methyladenosine RNA binding protein 1                         | YTHDF1   | 697816    |
| YTH N(6)-methyladenosine RNA binding protein 2                         | YTHDF2   | 717225    |
| Zinc finger (CCCH type), RNA binding motif and serine/arginine rich 2  | ZRSR2    | 720986    |
| Zinc finger and BTB domain containing 26                               | ZBTB26   | 698776    |
| Zinc finger and BTB domain containing 33                               | ZBTB33   | 695801    |
| Zinc finger and BTB domain containing 39                               | ZBTB39   | 713914    |
| Zinc finger and BTB domain containing 49                               | ZBTB49   | 712422    |
| Zinc finger and BTB domain containing 5                                | ZBTB5    | 718482    |
| Zinc finger and SCAN domain containing 21                              | ZSCAN21  | 710501    |
| Zinc finger and SCAN domain containing 29                              | ZSCAN29  | 710414    |
| Zinc finger and SCAN domain containing 32                              | ZSCAN32  | 702733    |
| Zinc finger CCCH-type containing 11A                                   | ZC3H11A  | 701537    |
| Zinc finger CCCH-type containing 12A                                   | ZC3H12A  | 713604    |
| Zinc finger CCCH-type containing 15                                    | ZC3H15   | 707648    |
| Zinc finger CCCH-type containing 3                                     | ZC3H3    | 708584    |
| Zinc finger CCCH-type containing 7A                                    | ZC3H7A   | 711984    |
| Zinc finger homeobox 3                                                 | ZFHX3    | 706074    |
| Zinc finger protein 140                                                | ZNF140   | 695171    |
| Zinc finger protein 143                                                | ZNF143   | 703978    |
| Zinc finger protein 177                                                | ZNF177   | 709851    |
| Zinc finger protein 180                                                | ZNF180   | 712493    |
| Zinc finger protein 181                                                | ZNF181   | 106992423 |
| Zinc finger protein 207                                                | ZNF207   | 100689489 |
| Zinc finger protein 211                                                | ZNF211   | 100429294 |
| Zinc finger protein 215                                                | ZNF215   | 708494    |
| Zinc finger protein 22                                                 | ZNF22    | 706208    |
| Zinc finger protein 221                                                | ZNF221   | 100423743 |
| Zinc finger protein 239                                                | ZNF239   | 717737    |
| Zinc finger protein 25                                                 | ZNF25    | 701129    |
| Zinc finger protein 263                                                | ZNF263   | 702166    |
| Zinc finger protein 280D                                               | ZNF280D  | 699509    |
| Zinc finger protein 281                                                | ZNF281   | 709466    |
| Zinc finger protein 311                                                | ZNF311   | 708417    |

|                                                 |         |           |
|-------------------------------------------------|---------|-----------|
| Zinc finger protein 322                         | ZNF322  | 701098    |
| Zinc finger protein 385A                        | ZNF385A | 705436    |
| Zinc finger protein 408                         | ZNF408  | 714213    |
| Zinc finger protein 410                         | ZNF410  | 698124    |
| Zinc finger protein 436                         | ZNF436  | 709638    |
| Zinc finger protein 460                         | ZNF460  | 710080    |
| Zinc finger protein 462                         | ZNF462  | 711489    |
| Zinc finger protein 474                         | ZNF474  | 700119    |
| Zinc finger protein 484                         | ZNF484  | 711976    |
| Zinc finger protein 496                         | ZNF496  | 709694    |
| Zinc finger protein 521                         | ZNF521  | 709169    |
| Zinc finger protein 593                         | ZNF593  | 714086    |
| Zinc finger protein 595                         | ZNF595  | 716693    |
| Zinc finger protein 608                         | ZNF608  | 702182    |
| Zinc finger protein 620                         | ZNF620  | 100423711 |
| Zinc finger protein 622                         | ZNF622  | 100429385 |
| Zinc finger protein 627                         | ZNF627  | 716820    |
| Zinc finger protein 638                         | ZNF638  | 704418    |
| Zinc finger protein 646                         | ZNF646  | 712774    |
| Zinc finger protein 653                         | ZNF653  | 714754    |
| Zinc finger protein 664                         | ZNF664  | 710703    |
| Zinc finger protein 684                         | ZNF684  | 695691    |
| Zinc finger protein 687                         | ZNF687  | 716590    |
| Zinc finger protein 7                           | ZNF7    | 715735    |
| Zinc finger protein 777                         | ZNF777  | 711987    |
| Zinc finger protein 804B                        | ZNF804B | 704561    |
| Zinc finger protein 830                         | ZNF830  | 715130    |
| Zinc finger protein 835                         | ZNF835  | 705945    |
| Zinc finger protein 92                          | ZNF92   | 708683    |
| Zinc finger RNA binding protein                 | ZFR     | 696882    |
| Zinc finger with UFM1-specific peptidase domain | ZUFSP   | 718059    |
| Zinc finger, AN1-type domain 2A                 | ZFAND2A | 100426344 |
| Zinc finger, AN1-type domain 2B                 | ZFAND2B | 702027    |
| Zinc finger, AN1-type domain 3                  | ZFAND3  | 719346    |
| Zinc finger, AN1-type domain 4                  | ZFAND4  | 708136    |
| Zinc finger, AN1-type domain 6                  | ZFAND6  | 717543    |
| Zinc finger, C3H1-type containing               | ZFC3H1  | 718671    |
| Zinc finger, CCCH-type with G-patch domain      | ZGPAT   | 719499    |
| Zinc finger, CCHC domain containing 11          | ZCCHC11 | 713406    |
| Zinc finger, CCHC domain containing 14          | ZCCHC14 | 703833    |
| Zinc finger, CCHC domain containing 17          | ZCCHC17 | 705172    |
| Zinc finger, CCHC domain containing 3           | ZCCHC3  | 714477    |
| Zinc finger, CCHC domain containing 6           | ZCCHC6  | 693660    |
| Zinc finger, CCHC domain containing 7           | ZCCHC7  | 716658    |
| Zinc finger, CCHC domain containing 8           | ZCCHC8  | 702359    |
| Zinc finger, DHHC-type containing 12            | ZDHHC12 | 722606    |
| Zinc finger, DHHC-type containing 16            | ZDHHC16 | 705982    |
| Zinc finger, DHHC-type containing 24            | ZDHHC24 | 713870    |

|                                                |          |        |
|------------------------------------------------|----------|--------|
| Zinc finger, DHHC-type containing 5            | ZDHHC5   | 704863 |
| Zinc finger, DHHC-type containing 6            | ZDHHC6   | 696538 |
| Zinc finger, FYVE domain containing 16         | ZFYVE16  | 710872 |
| Zinc finger, FYVE domain containing 27         | ZFYVE27  | 707273 |
| Zinc finger, matrin-type 2                     | ZMAT2    | 697247 |
| Zinc finger, matrin-type 5                     | ZMAT5    | 715058 |
| Zinc finger, MYM-type 2                        | ZMYM2    | 721255 |
| Zinc finger, MYM-type 3                        | ZMYM3    | 697147 |
| Zinc finger, MYM-type 4                        | ZMYM4    | 712793 |
| Zinc finger, MYND-type containing 11           | ZMYND11  | 708761 |
| Zinc finger, RAN-binding domain containing 2   | ZRANB2   | 703513 |
| Zinc metallopeptidase STE24                    | ZMPSTE24 | 693765 |
| Zona pellucida glycoprotein 3 (sperm receptor) | ZP3      | 719925 |
| Zyxin                                          | ZYX      | 706407 |



Table S5: List of expressed genes in the endometrium

**(1) Expressed in both groups 1 and 2**

| Gene Name                                                            | Gene Symbol | Entrez Gene ID |
|----------------------------------------------------------------------|-------------|----------------|
| 1-acylglycerol-3-phosphate O-acyltransferase 1                       | AGPAT1      | 717174         |
| 5-phosphohydroxy-L-lysine phospho-lyase                              | PHYKPL      | 702302         |
| 8-oxoguanine DNA glycosylase                                         | OGG1        | 700481         |
| Abhydrolase domain containing 8                                      | ABHD8       | 718980         |
| Actin like 7B                                                        | ACTL7B      | 710750         |
| ADAM metalloproteinase with thrombospondin type 1 motif 14           | ADAMTS14    | 710154         |
| Adaptor related protein complex 1 associated regulatory protein      | AP1AR       | 700734         |
| Adenylate cyclase 4                                                  | ADCY4       | 714684         |
| Aladin WD repeat nucleoporin                                         | AAAS        | 719095         |
| Alkb homolog 4, lysine demethylase                                   | ALKBH4      | 715078         |
| Aminoacylase 3                                                       | ACY3        | 711083         |
| Anaphase promoting complex subunit 2                                 | ANAPC2      | 706384         |
| Ancient ubiquitous protein 1                                         | AUP1        | 710020         |
| Ankyrin repeat and IBR domain containing 1                           | ANKIB1      | 703273         |
| Ankyrin repeat domain 2 (stretch responsive muscle)                  | ANKRD2      | 707097         |
| Ankyrin repeat domain 6                                              | ANKRD6      | 701339         |
| Apolipoprotein B mRNA editing enzyme, catalytic polypeptide-like 3H  | APOBEC3H    | 723811         |
| Apoptosis inducing factor, mitochondria associated 1                 | AIFM1       | 702773         |
| Artemin                                                              | ARTN        | 701641         |
| Ataxin 2-like                                                        | ATXN2L      | 708359         |
| ATP synthase F0 subunit 6                                            | ATP6        | 2846629        |
| ATPase, H <sup>+</sup> transporting, lysosomal 14kda, V1 subunit F   | ATP6V1F     | 702112         |
| ATPase, H <sup>+</sup> /K <sup>+</sup> exchanging, alpha polypeptide | ATP4A       | 100426216      |
| Autophagy related 2A                                                 | ATG2A       | 717290         |
| Autophagy related 7                                                  | ATG7        | 696238         |
| B9 protein domain 2                                                  | B9D2        | 704873         |
| BCL2-associated X protein                                            | BAX         | 718948         |
| BCS1-like (S. Cerevisiae)                                            | BCS1L       | 699690         |
| Beta-2-microglobulin                                                 | B2M         | 712428         |
| Bloom syndrome, recq helicase-like                                   | BLM         | 703460         |
| Bone morphogenetic protein 1                                         | BMP1        | 707596         |
| BPI fold containing family A member 2                                | BPIFA2      | 710376         |
| Bromodomain adjacent to zinc finger domain 1B                        | BAZ1B       | 716436         |
| Bromodomain containing 2                                             | BRD2        | 717893         |
| Cadherin 11, type 2, OB-cadherin (osteoblast)                        | CDH11       | 708826         |
| Cadherin related family member 2                                     | CDHR2       | 697249         |
| Calcium/calmodulin-dependent protein kinase II delta                 | CAMK2D      | 702504         |
| Calreticulin                                                         | CALR        | 716910         |
| Carboxypeptidase N subunit 2                                         | CPN2        | 106997192      |

|                                                               |             |           |
|---------------------------------------------------------------|-------------|-----------|
| Casein kinase 2, beta polypeptide                             | CSNK2B      | 715807    |
| Catalase                                                      | CAT         | 717406    |
| Cathepsin C                                                   | CTSC        | 705320    |
| Cbl proto-oncogene B, E3 ubiquitin protein ligase             | CBLB        | 703879    |
| CD19 molecule                                                 | CD19        | 705211    |
| CD1c molecule                                                 | CD1C        | 717148    |
| CD63 molecule                                                 | CD63        | 709828    |
| Cell death-inducing DFFA-like effector b                      | CIDEB       | 100425328 |
| Cell growth regulator with ring finger domain 1               | CGRRF1      | 695231    |
| Centrosomal protein 41kda                                     | CEP41       | 703215    |
| Centrosomal protein 57kda-like 1                              | CEP57L1     | 700109    |
| Chromosome 1 open reading frame, human c1orf198               | C1H1orf198  | 714084    |
| Chromosome 1 open reading frame, human c1orf54                | C1H1orf54   | 107000832 |
| Chromosome 3 open reading frame, human c21orf91               | C3H21orf91  | 710406    |
| Chromosome 7 open reading frame, human c14orf166              | C7H14orf166 | 710094    |
| Chromosome 8 open reading frame, human c8orf59                | C8H8orf59   | 703464    |
| Cilia and flagella associated protein 65                      | CFAP65      | 701296    |
| Ciliary neurotrophic factor                                   | CNTF        | 701907    |
| Cleavage and polyadenylation specific factor 4                | CPSF4       | 708119    |
| Cleft lip and palate associated transmembrane protein 1       | CLPTM1      | 718306    |
| Cofilin 1 (non-muscle)                                        | CFL1        | 721882    |
| Cofilin 2 (muscle)                                            | CFL2        | 693875    |
| Coiled-coil domain containing 92                              | CCDC92      | 705922    |
| Collagen, type III, alpha 1                                   | COL3A1      | 574131    |
| Complement factor properdin                                   | CFP         | 707386    |
| Cornichon family AMPA receptor auxiliary protein 1            | CNIH1       | 695002    |
| C-src tyrosine kinase                                         | CSK         | 702868    |
| CUE domain containing 2                                       | CUEDC2      | 713243    |
| Cyclin D3                                                     | CCND3       | 695215    |
| Cyclin-dependent kinase 4                                     | CDK4        | 715650    |
| Cystatin C                                                    | CST3        | 574313    |
| Cytochrome P450, family 2, subfamily D, polypeptide 6         | CYP2D6      | 678691    |
| Cytochrome P450c17                                            | CYP17A1     | 678693    |
| Dachsous cadherin-related 1                                   | DCHS1       | 711938    |
| DDB1 and CUL4 associated factor 11                            | DCAF11      | 714867    |
| DEAD (Asp-Glu-Ala-Asp) box polypeptide 41                     | DDX41       | 700742    |
| DEAH (Asp-Glu-Ala-His) box polypeptide 38                     | DHX38       | 709173    |
| Dedicator of cytokinesis 5                                    | DOCK5       | 711359    |
| Dehydrogenase/reductase (SDR family) member 3                 | DHRS3       | 715548    |
| Denticleless E3 ubiquitin protein ligase homolog (Drosophila) | DTL         | 711236    |
| Deoxyhypusine synthase                                        | DHPS        | 716213    |
| Dnaj heat shock protein family (Hsp40) member C27             | DNAJC27     | 694037    |
| Dnaj heat shock protein family (Hsp40) member C3              | DNAJC3      | 695757    |
| Docking protein 5                                             | DOK5        | 698689    |
| DR1-associated protein 1 (negative cofactor 2 alpha)          | DRAP1       | 715271    |
| Drosha, ribonuclease type III                                 | DROSHA      | 692081    |
| DTW domain containing 1                                       | DTWD1       | 715084    |
| E1A binding protein p300                                      | EP300       | 706258    |

|                                                                           |          |        |
|---------------------------------------------------------------------------|----------|--------|
| E74-like factor 2 (ets domain transcription factor)                       | ELF2     | 696760 |
| Ectodysplasin A receptor                                                  | EDAR     | 695059 |
| EGF-like-domain, multiple 7                                               | EGFL7    | 709840 |
| EGF-like-domain, multiple 8                                               | EGFL8    | 717145 |
| ELOVL fatty acid elongase 4                                               | ELOVL4   | 692070 |
| Enhancer of rudimentary homolog (Drosophila)                              | ERH      | 712507 |
| ERGIC and golgi 3                                                         | ERGIC3   | 704736 |
| Eukaryotic translation elongation factor 1 beta 2                         | EEF1B2   | 707019 |
| Eukaryotic translation elongation factor 1 gamma                          | EEF1G    | 722274 |
| Eukaryotic translation initiation factor 3 subunit L                      | EIF3L    | 699189 |
| Eukaryotic translation initiation factor 4H                               | EIF4H    | 693429 |
| EWS RNA binding protein 1                                                 | EWSR1    | 714432 |
| Exocyst complex component 2                                               | EXOC2    | 706296 |
| Exostosin glycosyltransferase 1                                           | EXT1     | 701488 |
| Family with sequence similarity 178 member B                              | FAM178B  | 710890 |
| Family with sequence similarity 181 member B                              | FAM181B  | 701184 |
| Fem-1 homolog b (C. Elegans)                                              | FEM1B    | 693955 |
| Filamin binding LIM protein 1                                             | FBLIM1   | 695727 |
| Follistatin like 1                                                        | FSTL1    | 713367 |
| Fuzzy planar cell polarity protein                                        | FUZ      | 719442 |
| FXYP domain containing ion transport regulator 7                          | FXYP7    | 718457 |
| FYN proto-oncogene, Src family tyrosine kinase                            | FYN      | 574214 |
| G protein pathway suppressor 1                                            | GPS1     | 719343 |
| G protein-coupled bile acid receptor 1                                    | GPBAR1   | 697937 |
| G protein-coupled receptor 31                                             | GPR31    | 717158 |
| G2/M-phase specific E3 ubiquitin protein ligase                           | G2E3     | 717021 |
| Gamma-glutamylcyclotransferase                                            | GGCT     | 695547 |
| General transcription factor IIH subunit 5                                | GTF2H5   | 700107 |
| GLE1, RNA export mediator                                                 | GLE1     | 717474 |
| Glucose-fructose oxidoreductase domain containing 1                       | GFOD1    | 700607 |
| Glucosidase, beta (bile acid) 2                                           | GBA2     | 696062 |
| Glutathione S-transferase alpha 4                                         | GSTA4    | 709666 |
| Golgi-associated, gamma adaptin ear containing, ARF binding protein 3     | GGA3     | 705751 |
| GRB2-related adaptor protein                                              | GRAP     | 702473 |
| Guanidinoacetate N-methyltransferase                                      | GAMT     | 721263 |
| Guanine nucleotide binding protein (G protein), beta polypeptide 2-like 1 | GNB2L1   | 708526 |
| Guanylate kinase 1                                                        | GUK1     | 695272 |
| H2A histone family, member Z                                              | H2AFZ    | 709326 |
| HAUS augmin like complex subunit 8                                        | HAUS8    | 718874 |
| Heat shock factor binding protein 1                                       | HSBP1    | 714498 |
| Heat shock protein 90kda alpha family class B member 1                    | HSP90AB1 | 702293 |
| Heat shock protein family B (small) member 11                             | HSPB11   | 714791 |
| Heat shock transcription factor 2                                         | HSF2     | 713938 |
| Hematopoietic prostaglandin D synthase                                    | HPGDS    | 705227 |
| Homeodomain interacting protein kinase 1                                  | HIPK1    | 707856 |
| Hyaluronan and proteoglycan link protein 3                                | HAPLN3   | 698880 |

|                                                                                          |           |           |
|------------------------------------------------------------------------------------------|-----------|-----------|
| Hyperpolarization activated cyclic nucleotide gated potassium channel 3                  | HCN3      | 717719    |
| IMP3, U3 small nucleolar ribonucleoprotein                                               | IMP3      | 706202    |
| Inhibin alpha                                                                            | INHA      | 574379    |
| Insulin like 3                                                                           | INSL3     | 100533192 |
| Integrin linked kinase                                                                   | ILK       | 709944    |
| Interferon regulatory factor 2                                                           | IRF2      | 694347    |
| Intraflagellar transport 20                                                              | IFT20     | 715773    |
| Intraflagellar transport 57                                                              | IFT57     | 705088    |
| IQ motif containing K                                                                    | IQCK      | 695417    |
| IQ motif containing with AAA domain 1                                                    | IQCA1     | 694173    |
| KDEL motif containing 1                                                                  | KDELC1    | 702156    |
| Keratin associated protein 12-4                                                          | KRTAP12-4 | 712284    |
| LCK proto-oncogene, Src family tyrosine kinase                                           | LCK       | 717704    |
| Leucine rich repeat and coiled-coil centrosomal protein 1                                | LRRCC1    | 707964    |
| Leucine rich repeat containing 42                                                        | LRRC42    | 714839    |
| Leucine-rich repeats and WD repeat domain containing 1                                   | LRWD1     | 715187    |
| Leukocyte immunoglobulin-like receptor, subfamily B (with TM and ITIM domains), member 1 | LILRB1    | 692340    |
| Leukocyte-associated immunoglobulin-like receptor 1                                      | LAIR1     | 695533    |
| Leupaxin                                                                                 | LPXN      | 702033    |
| Lipocalin 1                                                                              | LCN1      | 711974    |
| LSM14A mrna processing body assembly factor                                              | LSM14A    | 705085    |
| Lymphocyte antigen 6 complex, locus G6C                                                  | LY6G6C    | 716220    |
| Lysine-rich nucleolar protein 1                                                          | KNOP1     | 695144    |
| MAD2L1 binding protein                                                                   | MAD2L1BP  | 701099    |
| Matrin 3                                                                                 | MATR3     | 100568448 |
| MDM2 binding protein                                                                     | MTBP      | 703121    |
| Mediator complex subunit 6                                                               | MED6      | 693320    |
| Meiosis 1 associated protein                                                             | M1AP      | 710210    |
| Microtubule associated protein 1S                                                        | MAP1S     | 719196    |
| Midline 1                                                                                | MID1      | 709683    |
| Mitochondrial E3 ubiquitin protein ligase 1                                              | MUL1      | 705429    |
| Mitochondrial ribosomal protein L11                                                      | MRPL11    | 714094    |
| Mitochondrial ribosomal protein L42                                                      | MRPL42    | 715676    |
| Mitochondrial ribosomal protein S21                                                      | MRPS21    | 706805    |
| Mitogen-activated protein kinase kinase kinase 6                                         | MAP3K6    | 715911    |
| Msh homeobox 2                                                                           | MSX2      | 694227    |
| Myeloid/lymphoid or mixed-lineage leukemia; translocated to, 6                           | MLLT6     | 694045    |
| Myotubularin 1                                                                           | MTM1      | 703131    |
| Myotubularin related protein 2                                                           | MTMR2     | 699703    |
| NAD(P)H dehydrogenase, quinone 2                                                         | NQO2      | 707675    |
| NADH:ubiquinone oxidoreductase complex assembly factor 4                                 | NDUFAF4   | 705102    |
| NADH:ubiquinone oxidoreductase subunit A12                                               | NDUFA12   | 711970    |
| Negative elongation factor complex member E                                              | NELFE     | 716913    |
| N-glycanase 1                                                                            | NGLY1     | 700842    |
| Nicotinamide nucleotide transhydrogenase                                                 | NNT       | 701110    |
| N-terminal Xaa-Pro-Lys N-methyltransferase 1                                             | NTMT1     | 716763    |

|                                                                      |          |           |
|----------------------------------------------------------------------|----------|-----------|
| Nuclear casein kinase and cyclin-dependent kinase substrate 1        | NUCKS1   | 697298    |
| Nuclear factor of kappa light polypeptide gene enhancer in B-cells 1 | NFKB1    | 710324    |
| Nuclear receptor subfamily 1 group I member 2                        | NR1I2    | 574226    |
| Nucleoporin 50kda                                                    | NUP50    | 713282    |
| Nudix hydrolase 1                                                    | NUDT1    | 713078    |
| Olfactory receptor, family 2, subfamily AG, member 2                 | OR2AG2   | 709556    |
| Origin recognition complex subunit 5                                 | ORC5     | 696683    |
| ORMDL sphingolipid biosynthesis regulator 2                          | ORMDL2   | 710296    |
| P450 (cytochrome) oxidoreductase                                     | POR      | 715888    |
| Pancreatic polypeptide                                               | PPY      | 713988    |
| PAP associated domain containing 7                                   | PAPD7    | 713853    |
| Par-3 family cell polarity regulator                                 | PARD3    | 706472    |
| PDZ domain containing 4                                              | PDZD4    | 697387    |
| Peroxiredoxin 2                                                      | PRDX2    | 716665    |
| PHD finger protein 1                                                 | PHF1     | 718337    |
| Phosphatase, orphan 1                                                | PHOSPHO1 | 698959    |
| Phosphate cytidylyltransferase 1, choline, alpha                     | PCYT1A   | 722105    |
| Phosphatidylinositol 4-kinase, catalytic, beta                       | PI4KB    | 710104    |
| Phosphatidylinositol glycan anchor biosynthesis class H              | PIGH     | 710780    |
| Phosphatidylinositol glycan anchor biosynthesis class S              | PIGS     | 709115    |
| Phospholipase B domain containing 1                                  | PLBD1    | 698939    |
| Phospholipase D family member 3                                      | PLD3     | 701083    |
| Platelet-derived growth factor beta polypeptide                      | PDGFB    | 703173    |
| Poliovirus receptor-related 2 (herpesvirus entry mediator B)         | PVRL2    | 713229    |
| Poly(A) binding protein, cytoplasmic 1                               | PABPC1   | 705847    |
| Poly(ADP-ribose) glycohydrolase                                      | PARG     | 709432    |
| Poly(rc) binding protein 2                                           | PCBP2    | 703175    |
| Polycomb group ring finger 2                                         | PCGF2    | 694187    |
| Polyglutamine binding protein 1                                      | PQBP1    | 711678    |
| Polyhomeotic homolog 2 (Drosophila)                                  | PHC2     | 710201    |
| Polymerase (RNA) II (DNA directed) polypeptide I, 14.5kda            | POLR2I   | 712412    |
| Potassium channel tetramerization domain containing 9                | KCTD9    | 711515    |
| Potassium voltage-gated channel, modifier subfamily S, member 1      | KCNS1    | 711715    |
| Presenilin enhancer gamma secretase subunit                          | PSENEN   | 100429008 |
| Proline rich 3                                                       | PRR3     | 711699    |
| Proteasomal ATPase associated factor 1                               | PAAF1    | 718755    |
| Proteasome subunit alpha 4                                           | PSMA4    | 710417    |
| Proteasome subunit beta 2                                            | PSMB2    | 712193    |
| Protein phosphatase 1 regulatory subunit 15A                         | PPP1R15A | 718350    |
| Protein phosphatase 3, catalytic subunit, gamma isozyme              | PPP3CC   | 708233    |
| Protein tyrosine phosphatase type IVA, member 2                      | PTP4A2   | 706489    |
| RAB, member of RAS oncogene family-like 2B                           | RABL2B   | 716615    |
| RAB5B, member RAS oncogene family                                    | RAB5B    | 708347    |
| RAB6A, member RAS oncogene family                                    | RAB6A    | 718717    |
| RAD9 checkpoint clamp component A                                    | RAD9A    | 712345    |
| Ral gtpase activating protein, alpha subunit 1 (catalytic)           | RALGAPA1 | 695674    |
| RALY heterogeneous nuclear ribonucleoprotein                         | RALY     | 713317    |

|                                                                |         |           |
|----------------------------------------------------------------|---------|-----------|
| RAN binding protein 10                                         | RANBP10 | 700911    |
| Rap guanine nucleotide exchange factor 2                       | RAPGEF2 | 704717    |
| Ras homolog family member C                                    | RHOC    | 706034    |
| Ras homolog family member J                                    | RHOJ    | 705603    |
| Recq helicase-like                                             | RECQL   | 705871    |
| Replication protein A3                                         | RPA3    | 696248    |
| Retinol dehydrogenase 5 (11-cis/9-cis)                         | RDH5    | 709644    |
| RFT1 homolog                                                   | RFT1    | 694586    |
| Rho guanine nucleotide exchange factor 1                       | ARHGEF1 | 722198    |
| Ribonuclease P/MRP 21kda subunit                               | RPP21   | 713056    |
| Ribophorin II                                                  | RPN2    | 708971    |
| Ribosomal protein l10a                                         | RPL10A  | 718783    |
| Ribosomal protein L23                                          | RPL23   | 694719    |
| Ribosomal protein l23a                                         | RPL23A  | 710490    |
| Ribosomal protein L24                                          | RPL24   | 702381    |
| Ribosomal protein L4                                           | RPL4    | 710590    |
| Ribosomal protein l7a                                          | RPL7A   | 722215    |
| Ribosomal protein L8                                           | RPL8    | 708535    |
| Ribosomal protein S10                                          | RPS10   | 718606    |
| Ribosomal protein S13                                          | RPS13   | 697513    |
| Ribosomal protein S14                                          | RPS14   | 710901    |
| Ribosomal protein S16                                          | RPS16   | 697219    |
| Ribosomal protein S2                                           | RPS2    | 693615    |
| Ribosomal protein S27                                          | RPS27   | 106992520 |
| Ribosomal protein S28                                          | RPS28   | 707133    |
| Ribosomal protein S4, X-linked                                 | RPS4X   | 699397    |
| Ribosomal protein S5                                           | RPS5    | 711259    |
| Ribosomal protein S7                                           | RPS7    | 721900    |
| Ribosomal protein S8                                           | RPS8    | 703957    |
| Ribosomal protein, large, P0                                   | RPLP0   | 574363    |
| Ribosomal protein, large, P1                                   | RPLP1   | 695442    |
| Ribosomal protein, large, P2                                   | RPLP2   | 700698    |
| Ribosomal RNA processing 8, methyltransferase, homolog (yeast) | RRP8    | 712011    |
| Ring finger protein 38                                         | RNF38   | 693346    |
| RNA binding motif protein 45                                   | RBM45   | 702714    |
| RNA pseudouridylate synthase domain containing 3               | RPUSD3  | 700349    |
| SEC31 homolog A, COPII coat complex component                  | SEC31A  | 693687    |
| Sec61 translocon alpha 2 subunit                               | SEC61A2 | 100427728 |
| Selenoprotein M                                                | SELM    | 718290    |
| SFI1 centrin binding protein                                   | SFI1    | 716833    |
| Siah E3 ubiquitin protein ligase 1                             | SIAH1   | 716629    |
| Signal peptide, CUB domain, EGF-like 2                         | SCUBE2  | 708152    |
| Signal recognition particle 68kda                              | SRP68   | 705568    |
| Signal sequence receptor, delta                                | SSR4    | 697266    |
| Sin3A associated protein 25kda                                 | SAP25   | 106997576 |
| SKI-like proto-oncogene                                        | SKIL    | 696680    |
| SLIT and NTRK like family member 1                             | SLITRK1 | 699217    |
| Small nuclear ribonucleoprotein polypeptides B and B1          | SNRPB   | 716578    |

|                                                                                              |          |        |
|----------------------------------------------------------------------------------------------|----------|--------|
| Small ubiquitin-like modifier 1                                                              | SUMO1    | 703644 |
| SMYD family member 5                                                                         | SMYD5    | 705926 |
| Sodium channel, non voltage gated 1 beta subunit                                             | SCNN1B   | 700093 |
| Solute carrier family 25 (aspartate/glutamate carrier), member 12                            | SLC25A12 | 695173 |
| Solute carrier family 25 (S-adenosylmethionine carrier), member 26                           | SLC25A26 | 697960 |
| Solute carrier family 26 (anion exchanger), member 8                                         | SLC26A8  | 719049 |
| Solute carrier family 35 (UDP-galactose transporter), member A2                              | SLC35A2  | 711587 |
| Solute carrier family 35 (UDP-gluc/UDP-galnac transporter), member D1                        | SLC35D1  | 700175 |
| Solute carrier family 4 (anion exchanger), member 2                                          | SLC4A2   | 713966 |
| Solute carrier family 4, sodium borate transporter, member 11                                | SLC4A11  | 718393 |
| Solute carrier family 44 member 4                                                            | SLC44A4  | 715779 |
| Solute carrier organic anion transporter family member 2B1                                   | SLCO2B1  | 694829 |
| Sorting nexin 13                                                                             | SNX13    | 714019 |
| Sorting nexin 33                                                                             | SNX33    | 706309 |
| Sp2 transcription factor                                                                     | SP2      | 694834 |
| SPARC like 1                                                                                 | SPARCL1  | 701468 |
| Spectrin, beta, non-erythrocytic 1                                                           | SPTBN1   | 716794 |
| Src-related kinase lacking C-terminal regulatory tyrosine and N-terminal myristylation sites | SRMS     | 719587 |
| ST3 beta-galactoside alpha-2,3-sialyltransferase 4                                           | ST3GAL4  | 717792 |
| Star related lipid transfer domain containing 3                                              | STARD3   | 697212 |
| Star related lipid transfer domain containing 5                                              | STARD5   | 713308 |
| Stomatin like 2                                                                              | STOML2   | 698458 |
| Storkhead box 2                                                                              | STOX2    | 693692 |
| Sulfiredoxin 1                                                                               | SRXN1    | 714997 |
| SUMO1/sentrin specific peptidase 5                                                           | SEN5     | 710223 |
| SURP and G-patch domain containing 1                                                         | SUGP1    | 719772 |
| Synovial sarcoma translocation gene on chromosome 18-like 2                                  | SS18L2   | 716387 |
| TATA-box binding protein associated factor 5                                                 | TAF5     | 714558 |
| T-box 21                                                                                     | TBX21    | 694044 |
| TCF3 (E2A) fusion partner (in childhood Leukemia)                                            | TFPT     | 720296 |
| Teashirt zinc finger homeobox 1                                                              | TSHZ1    | 703018 |
| Telomeric repeat binding factor 2, interacting protein                                       | TERF2IP  | 712149 |
| TERF1 (TRF1)-interacting nuclear factor 2                                                    | TINF2    | 715812 |
| Testis expressed 30                                                                          | TEX30    | 701917 |
| Tetratricopeptide repeat domain 7B                                                           | TTC7B    | 696029 |
| TGF-beta activated kinase 1/MAP3K7 binding protein 1                                         | TAB1     | 703409 |
| THAP domain containing 7                                                                     | THAP7    | 696208 |
| Thioredoxin domain containing 9                                                              | TXNDC9   | 709303 |
| THO complex 6                                                                                | THOC6    | 700217 |
| Transducin (beta)-like 1 X-linked receptor 1                                                 | TBL1XR1  | 712740 |
| Transforming, acidic coiled-coil containing protein 3                                        | TACC3    | 712898 |
| Translocase of inner mitochondrial membrane 17 homolog B (yeast)                             | TIMM17B  | 714895 |
| Transmembrane 4 L six family member 5                                                        | TM4SF5   | 709844 |
| Transmembrane phosphoinositide 3-phosphatase and tensin                                      | TPTE2    | 704870 |

|                                                                        |          |           |
|------------------------------------------------------------------------|----------|-----------|
| homolog 2                                                              |          |           |
| Transmembrane protease, serine 13                                      | TMPRSS13 | 698586    |
| Transmembrane protein 104                                              | TMEM104  | 698592    |
| Transmembrane protein 115                                              | TMEM115  | 702164    |
| Transmembrane protein 135                                              | TMEM135  | 704963    |
| Transmembrane protein 138                                              | TMEM138  | 693905    |
| Transmembrane protein 5                                                | TMEM5    | 717102    |
| TRK-fused gene                                                         | TFG      | 700972    |
| Tropomyosin 2 (beta)                                                   | TPM2     | 696604    |
| Tryptase gamma 1                                                       | TPSG1    | 100425752 |
| TSSK6 activating co-chaperone                                          | TSACC    | 719490    |
| Tumor protein, translationally-controlled 1                            | TPT1     | 702155    |
| Twist family bhlh transcription factor 2                               | TWIST2   | 697078    |
| Tyrosine kinase, non-receptor, 1                                       | TNK1     | 715180    |
| Ubiquitin A-52 residue ribosomal protein fusion product 1              | UBA52    | 720243    |
| Ubiquitin B                                                            | UBB      | 696110    |
| Ubiquitin conjugating enzyme E2 variant 1                              | UBE2V1   | 100425552 |
| Ubiquitin conjugating enzyme E2O                                       | UBE2O    | 710529    |
| Ubiquitin like 5                                                       | UBL5     | 711015    |
| Ubiquitin like 7                                                       | UBL7     | 702305    |
| Ubiquitin related modifier 1                                           | URM1     | 722618    |
| Ubiquitin specific peptidase 21                                        | USP21    | 719894    |
| Ubiquitination factor E4B                                              | UBE4B    | 713348    |
| UBX domain protein 11                                                  | UBXN11   | 719826    |
| USP6 N-terminal like                                                   | USP6NL   | 694275    |
| V-akt murine thymoma viral oncogene homolog 3                          | AKT3     | 714717    |
| Valyl-trna synthetase                                                  | VAR5     | 715537    |
| Vitronectin                                                            | VTN      | 708499    |
| WD repeat domain 74                                                    | WDR74    | 718460    |
| WW domain binding protein 1                                            | WBP1     | 709202    |
| WW domain containing E3 ubiquitin protein ligase 2                     | WWP2     | 705464    |
| X-ray repair complementing defective repair in Chinese hamster cells 6 | XRCC6    | 707975    |
| YEATS domain containing 4                                              | YEATS4   | 718376    |
| Yip1 domain family member 4                                            | YIPF4    | 706819    |
| Yippee like 3                                                          | YPEL3    | 708740    |
| Zinc finger and BTB domain containing 39                               | ZBTB39   | 713914    |
| Zinc finger CCCH-type containing 12A                                   | ZC3H12A  | 713604    |
| Zinc finger CCCH-type containing 3                                     | ZC3H3    | 708584    |
| Zinc finger protein 22                                                 | ZNF22    | 706208    |
| Zinc finger protein 385A                                               | ZNF385A  | 705436    |
| Zinc finger protein 436                                                | ZNF436   | 709638    |
| Zinc finger protein 496                                                | ZNF496   | 709694    |
| Zinc finger protein 7                                                  | ZNF7     | 715735    |
| Zinc finger, DHHC-type containing 12                                   | ZDHHC12  | 722606    |
| Zinc finger, DHHC-type containing 16                                   | ZDHHC16  | 705982    |
| Zinc finger, matrin-type 5                                             | ZMAT5    | 715058    |
| Zinc finger, MYND-type containing 11                                   | ZMYND11  | 708761    |



|                                                |     |        |
|------------------------------------------------|-----|--------|
| Zona pellucida glycoprotein 3 (sperm receptor) | ZP3 | 719925 |
|------------------------------------------------|-----|--------|

---

**(2) Expressed in both groups 1a and 2a**

---

|                                                                                     |         |           |
|-------------------------------------------------------------------------------------|---------|-----------|
| 1-acylglycerol-3-phosphate O-acyltransferase 1                                      | AGPAT1  | 717174    |
| 1-acylglycerol-3-phosphate O-acyltransferase 5                                      | AGPAT5  | 716847    |
| 1-aminocyclopropane-1-carboxylate synthase homolog (inactive)                       | ACCS    | 715798    |
| 2-aminoethanethiol (cysteamine) dioxygenase                                         | ADO     | 698259    |
| 2-oxoglutarate and iron-dependent oxygenase domain containing 2                     | OGFOD2  | 703753    |
| 2-phosphoxylose phosphatase 1                                                       | PXYLP1  | 715229    |
| 3-hydroxy-3-methylglutaryl-coa synthase 1                                           | HMGCS1  | 702553    |
| 3-hydroxyacyl-coa dehydratase 1                                                     | HACD1   | 700635    |
| 3-hydroxyanthranilate 3,4-dioxygenase                                               | HAAO    | 713101    |
| 3-hydroxybutyrate dehydrogenase, type 2                                             | BDH2    | 711108    |
| 3-oxoacyl-ACP synthase, mitochondrial                                               | OXSM    | 703382    |
| 3'-phosphoadenosine 5'-phosphosulfate synthase 1                                    | PAPSS1  | 695099    |
| 3'-phosphoadenosine 5'-phosphosulfate synthase 2                                    | PAPSS2  | 704688    |
| 5'-3' exoribonuclease 2                                                             | XRN2    | 700934    |
| 5-aminoimidazole-4-carboxamide ribonucleotide formyltransferase /IMP cyclohydrolase | ATIC    | 694819    |
| 5-hydroxymethylcytosine (hmc) binding, ES cell-specific                             | HMCEs   | 703524    |
| 5-hydroxytryptamine (serotonin) receptor 2B, G protein-coupled                      | HTR2B   | 711808    |
| 5'-nucleotidase, cytosolic IIIA                                                     | NT5C3A  | 708743    |
| 5-phosphohydroxy-L-lysine phospho-lyase                                             | PHYKPL  | 702302    |
| 8-oxoguanine DNA glycosylase                                                        | OGG1    | 700481    |
| Aarf domain containing kinase 1                                                     | ADCK1   | 707060    |
| Aarf domain containing kinase 2                                                     | ADCK2   | 693303    |
| Aarf domain containing kinase 3                                                     | ADCK3   | 697920    |
| Aarf domain containing kinase 4                                                     | ADCK4   | 702379    |
| Aarf domain containing kinase 5                                                     | ADCK5   | 100425840 |
| Abhydrolase domain containing 12                                                    | ABHD12  | 705915    |
| Abhydrolase domain containing 15                                                    | ABHD15  | 711493    |
| Abhydrolase domain containing 16A                                                   | ABHD16A | 716051    |
| Abhydrolase domain containing 17A                                                   | ABHD17A | 709119    |
| Abhydrolase domain containing 6                                                     | ABHD6   | 702384    |
| Abhydrolase domain containing 8                                                     | ABHD8   | 718980    |
| ABI family member 3                                                                 | ABI3    | 698710    |
| Abl-interactor 2                                                                    | ABI2    | 704956    |
| Abnormal spindle microtubule assembly                                               | ASPM    | 711153    |
| Acetoacetyl-coa synthetase                                                          | AACS    | 707015    |
| Acetyl-coa acetyltransferase 1                                                      | ACAT1   | 707653    |
| Acetyl-coa acyltransferase 1                                                        | ACAA1   | 696743    |
| Acetyl-coa acyltransferase 2                                                        | ACAA2   | 709350    |
| Acetyl-coa carboxylase alpha                                                        | ACACA   | 714218    |
| Acid phosphatase 6, lysophosphatidic                                                | ACP6    | 710431    |
| Acid sensing ion channel subunit 1                                                  | ASIC1   | 713320    |
| Acidic nuclear phosphoprotein 32 family member B                                    | ANP32B  | 715508    |

|                                                                 |          |           |
|-----------------------------------------------------------------|----------|-----------|
| Acidic nuclear phosphoprotein 32 family member E                | ANP32E   | 706251    |
| Acidic residue methyltransferase 1                              | ARMT1    | 704570    |
| Aconitase 1                                                     | ACO1     | 705075    |
| Aconitase 2                                                     | ACO2     | 707441    |
| Actin binding LIM protein 1                                     | ABLIM1   | 698641    |
| Actin like 6A                                                   | ACTL6A   | 708935    |
| Actin like 7B                                                   | ACTL7B   | 710750    |
| Actin related protein 2/3 complex subunit 1A                    | ARPC1A   | 718635    |
| Actin related protein 2/3 complex subunit 2                     | ARPC2    | 700536    |
| Actin related protein 2/3 complex subunit 3                     | ARPC3    | 709199    |
| Activating signal cointegrator 1 complex subunit 1              | ASCC1    | 709049    |
| Activating signal cointegrator 1 complex subunit 2              | ASCC2    | 715117    |
| Activating transcription factor 4                               | ATF4     | 703965    |
| Activating transcription factor 6                               | ATF6     | 720056    |
| Activator of basal transcription 1                              | ABT1     | 700856    |
| Activin A receptor type I                                       | ACVR1    | 697935    |
| Activin A receptor type IIB                                     | ACVR2B   | 696071    |
| Activity-dependent neuroprotector homeobox                      | ADNP     | 701422    |
| Acylaminoacyl-peptide hydrolase                                 | APEH     | 705948    |
| Acyl-coa binding domain containing 4                            | ACBD4    | 715963    |
| Acyl-coa binding domain containing 6                            | ACBD6    | 716418    |
| Acyl-coa dehydrogenase family member 9                          | ACAD9    | 704527    |
| Acyl-coa dehydrogenase, C-2 to C-3 short chain                  | ACADS    | 698196    |
| Acyl-coa oxidase 1, palmitoyl                                   | ACOX1    | 705197    |
| Acyl-coa synthetase long-chain family member 4                  | ACSL4    | 704908    |
| Acyl-coa synthetase short-chain family member 2                 | ACSS2    | 706703    |
| Acyl-coa thioesterase 13                                        | ACOT13   | 100335136 |
| Acyl-coa thioesterase 8                                         | ACOT8    | 717238    |
| Acylglycerol kinase                                             | AGK      | 694070    |
| ADAM metallopeptidase domain 10                                 | ADAM10   | 701355    |
| ADAM metallopeptidase domain 19                                 | ADAM19   | 715164    |
| ADAM metallopeptidase domain 32                                 | ADAM32   | 706797    |
| ADAM metallopeptidase with thrombospondin type 1 motif 14       | ADAMTS14 | 710154    |
| ADAM metallopeptidase with thrombospondin type 1 motif 3        | ADAMTS3  | 705473    |
| ADAM metallopeptidase with thrombospondin type 1 motif 6        | ADAMTS6  | 696021    |
| ADAM metallopeptidase with thrombospondin type 1 motif 9        | ADAMTS9  | 698341    |
| ADAMTS like 2                                                   | ADAMTSL2 | 713492    |
| Adaptor related protein complex 1 associated regulatory protein | AP1AR    | 700734    |
| Adaptor related protein complex 1 sigma 1 subunit               | AP1S1    | 719569    |
| Adaptor related protein complex 2 sigma 1 subunit               | AP2S1    | 716911    |
| Adaptor related protein complex 2, mu 1 subunit                 | AP2M1    | 703554    |
| Adaptor related protein complex 3, sigma 1 subunit              | AP3S1    | 696644    |
| Adaptor related protein complex 4, beta 1 subunit               | AP4B1    | 707634    |
| Adaptor related protein complex 4, mu 1 subunit                 | AP4M1    | 710944    |
| Adaptor related protein complex 5, mu 1 subunit                 | AP5M1    | 701050    |
| Adaptor related protein complex 5, sigma 1 subunit              | AP5S1    | 718611    |
| Additional sex combs like 2, transcriptional regulator          | ASXL2    | 695057    |
| Adducin 1                                                       | ADD1     | 700805    |

|                                                                      |          |           |
|----------------------------------------------------------------------|----------|-----------|
| Adenine phosphoribosyltransferase                                    | APRT     | 697715    |
| Adenomatosis polyposis coli down-regulated 1                         | APCDD1   | 722280    |
| Adenosine deaminase domain containing 1                              | ADAD1    | 707910    |
| Adenosine deaminase domain containing 2                              | ADAD2    | 715076    |
| Adenosine deaminase, RNA-specific                                    | ADAR     | 718759    |
| Adenosine deaminase, trna-specific 3                                 | ADAT3    | 106992296 |
| Adenosine monophosphate deaminase 2                                  | AMPD2    | 699561    |
| Adenylate cyclase 4                                                  | ADCY4    | 714684    |
| Adenylate cyclase 6                                                  | ADCY6    | 707978    |
| Adenylate kinase 2                                                   | AK2      | 709737    |
| Adenylosuccinate synthase                                            | ADSS     | 713580    |
| Adhesion G protein-coupled receptor A3                               | ADGRA3   | 715618    |
| Adhesion G protein-coupled receptor E5                               | ADGRE5   | 100426360 |
| Adhesion molecule with Ig-like domain 1                              | AMIGO1   | 698932    |
| Adipocyte plasma membrane associated protein                         | APMAP    | 704948    |
| Adiponectin receptor 1                                               | ADIPOR1  | 704626    |
| Adiponectin receptor 2                                               | ADIPOR2  | 707547    |
| ADNP homeobox 2                                                      | ADNP2    | 718342    |
| ADP ribosylation factor 4                                            | ARF4     | 703432    |
| ADP ribosylation factor gtpase activating protein 3                  | ARFGAP3  | 711160    |
| ADP ribosylation factor guanine nucleotide exchange factor 1         | ARFGEF1  | 704359    |
| ADP ribosylation factor interacting protein 1                        | ARFIP1   | 697533    |
| ADP ribosylation factor like gtpase 2 binding protein                | ARL2BP   | 703999    |
| ADP ribosylation factor like gtpase 4A                               | ARL4A    | 693302    |
| ADP ribosylation factor like gtpase 6 interacting protein 6          | ARL6IP6  | 695619    |
| ADP ribosylation factor like gtpase 8B                               | ARL8B    | 703201    |
| ADP ribosylation factor like gtpase 9                                | ARL9     | 695486    |
| ADP-ribose/CDP-alcohol diphosphatase, manganese-dependent            | ADPRM    | 717991    |
| ADP-ribosylarginine hydrolase                                        | ADPRH    | 712562    |
| ADP-ribosylhydrolase like 2                                          | ADPRHL2  | 712758    |
| ADP-ribosyltransferase 5                                             | ART5     | 574238    |
| AFG3 ATPase family gene 3-like 2 (S. Cerevisiae)                     | AFG3L2   | 703079    |
| AHA1, activator of heat shock 90kda protein ATPase homolog 1 (yeast) | AHSA1    | 706547    |
| Ajuba LIM protein                                                    | AJUBA    | 712865    |
| A-kinase anchoring protein 1                                         | AKAP1    | 708500    |
| A-kinase anchoring protein 10                                        | AKAP10   | 710970    |
| A-kinase anchoring protein 12                                        | AKAP12   | 641446    |
| A-kinase anchoring protein 14                                        | AKAP14   | 694769    |
| A-kinase anchoring protein 17A                                       | AKAP17A  | 693468    |
| A-kinase anchoring protein 2                                         | AKAP2    | 709841    |
| A-kinase anchoring protein 8 like                                    | AKAP8L   | 719202    |
| A-kinase anchoring protein 9                                         | AKAP9    | 702970    |
| Aladin WD repeat nucleoporin                                         | AAAS     | 719095    |
| Aldehyde dehydrogenase 1 family member A1                            | ALDH1A1  | 702598    |
| Aldehyde dehydrogenase 1 family member A3                            | ALDH1A3  | 694231    |
| Aldehyde dehydrogenase 18 family member A1                           | ALDH18A1 | 703357    |
| Aldehyde dehydrogenase 6 family member A1                            | ALDH6A1  | 698755    |
| Aldo-keto reductase family 1, member A1 (aldehyde reductase)         | AKR1A1   | 693380    |

|                                                                                                                        |          |           |
|------------------------------------------------------------------------------------------------------------------------|----------|-----------|
| Aldo-keto reductase family 1, member B1 (aldose reductase)                                                             | AKR1B1   | 705957    |
| Aldo-keto reductase family 1, member C1 (dihydrodiol dehydrogenase 1; 20-alpha (3-alpha)-hydroxysteroid dehydrogenase) | AKR1C1   | 711198    |
| Aldo-keto reductase family 1, member E2                                                                                | AKR1E2   | 711035    |
| ALG14, UDP-N-acetylglucosaminyltransferase subunit                                                                     | ALG14    | 709630    |
| ALG2, alpha-1,3/1,6-mannosyltransferase                                                                                | ALG2     | 714850    |
| ALG5, dolichyl-phosphate beta-glucosyltransferase                                                                      | ALG5     | 694836    |
| Alkb homolog 2, alpha-ketoglutarate-dependent dioxygenase                                                              | ALKBH2   | 706708    |
| Alkb homolog 3, alpha-ketoglutarate-dependent dioxygenase                                                              | ALKBH3   | 715921    |
| Alkb homolog 4, lysine demethylase                                                                                     | ALKBH4   | 715078    |
| Alkb homolog 5, RNA demethylase                                                                                        | ALKBH5   | 700205    |
| Alkb homolog 7                                                                                                         | ALKBH7   | 699343    |
| Allograft inflammatory factor 1                                                                                        | AIF1     | 574115    |
| All-trans retinoic acid induced differentiation factor                                                                 | ATRAID   | 699201    |
| Alpha 1,4-galactosyltransferase                                                                                        | A4GALT   | 710998    |
| Alpha- and gamma-adaptin binding protein                                                                               | AAGAB    | 711436    |
| Alpha thalassemia/mental retardation syndrome X-linked                                                                 | ATRX     | 705735    |
| Alpha-2-HS-glycoprotein                                                                                                | AHSG     | 699348    |
| Amidohydrolase domain containing 2                                                                                     | AMDHD2   | 697051    |
| Aminoacylase 3                                                                                                         | ACY3     | 711083    |
| Aminoadipate-semialdehyde dehydrogenase-phosphopantetheinyl transferase                                                | AASDHPPT | 100328984 |
| Aminomethyltransferase                                                                                                 | AMT      | 706515    |
| Aminopeptidase puromycin sensitive                                                                                     | NPEPPS   | 693995    |
| Amino-terminal enhancer of split                                                                                       | AES      | 712353    |
| Amphiphysin                                                                                                            | AMPH     | 704559    |
| Amylase, alpha 2B (pancreatic)                                                                                         | AMY2B    | 712893    |
| Amyloid beta (A4) precursor protein-binding, family B, member 1 (Fe65)                                                 | APBB1    | 712585    |
| Amyloid beta (A4) precursor protein-binding, family B, member 3                                                        | APBB3    | 698296    |
| Amyloid beta (A4) precursor-like protein 2                                                                             | APLP2    | 718819    |
| Anaphase promoting complex subunit 13                                                                                  | ANAPC13  | 717294    |
| Anaphase promoting complex subunit 15                                                                                  | ANAPC15  | 718333    |
| Anaphase promoting complex subunit 2                                                                                   | ANAPC2   | 706384    |
| Anaphase promoting complex subunit 4                                                                                   | ANAPC4   | 694006    |
| Anaphase promoting complex subunit 7                                                                                   | ANAPC7   | 709012    |
| Ancient ubiquitous protein 1                                                                                           | AUP1     | 710020    |
| Androgen-induced 1                                                                                                     | AIG1     | 700988    |
| Angiopoietin 2                                                                                                         | ANGPT2   | 716811    |
| Angiotensin II receptor-associated protein                                                                             | AGTRAP   | 722746    |
| Anillin actin binding protein                                                                                          | ANLN     | 706404    |
| Ankyrin 2, neuronal                                                                                                    | ANK2     | 702180    |
| Ankyrin 3, node of Ranvier (ankyrin G)                                                                                 | ANK3     | 699518    |
| Ankyrin repeat and IBR domain containing 1                                                                             | ANKIB1   | 703273    |
| Ankyrin repeat and SOCS box containing 12                                                                              | ASB12    | 707931    |
| Ankyrin repeat and SOCS box containing 3                                                                               | ASB3     | 716503    |
| Ankyrin repeat and sterile alpha motif domain containing 6                                                             | ANKS6    | 715178    |
| Ankyrin repeat domain 10                                                                                               | ANKRD10  | 695300    |
| Ankyrin repeat domain 13 family member D                                                                               | ANKRD13D | 721749    |

|                                                                     |          |           |
|---------------------------------------------------------------------|----------|-----------|
| Ankyrin repeat domain 13C                                           | ANKRD13C | 702811    |
| Ankyrin repeat domain 2 (stretch responsive muscle)                 | ANKRD2   | 707097    |
| Ankyrin repeat domain 27                                            | ANKRD27  | 716232    |
| Ankyrin repeat domain 35                                            | ANKRD35  | 706961    |
| Ankyrin repeat domain 37                                            | ANKRD37  | 100426384 |
| Ankyrin repeat domain 49                                            | ANKRD49  | 697693    |
| Ankyrin repeat domain 6                                             | ANKRD6   | 701339    |
| Ankyrin repeat, family A (RFXANK-like), 2                           | ANKRA2   | 703691    |
| Annexin A11                                                         | ANXA11   | 707628    |
| Annexin A2                                                          | ANXA2    | 706240    |
| Anoctamin 10                                                        | ANO10    | 715666    |
| Anoctamin 4                                                         | ANO4     | 695973    |
| Anterior gradient 3, protein disulphide isomerase family member     | AGR3     | 714517    |
| Anti-Mullerian hormone receptor, type II                            | AMHR2    | 702822    |
| Anti-silencing function 1A histone chaperone                        | ASF1A    | 714761    |
| Antizyme inhibitor 1                                                | AZIN1    | 693581    |
| Antizyme inhibitor 2                                                | AZIN2    | 709823    |
| APEX nuclease (apurinic/aprimidinic endonuclease) 2                 | APEX2    | 702084    |
| APEX nuclease (multifunctional DNA repair enzyme) 1                 | APEX1    | 702757    |
| Aph-1 homolog A, gamma secretase subunit                            | APH1A    | 706483    |
| Aph-1 homolog B, gamma secretase subunit                            | APH1B    | 705718    |
| Apolipoprotein B mRNA editing enzyme, catalytic polypeptide-like 3C | APOBEC3C | 705870    |
| Apolipoprotein B mRNA editing enzyme, catalytic polypeptide-like 3G | APOBEC3G | 574398    |
| Apolipoprotein B mRNA editing enzyme, catalytic polypeptide-like 3H | APOBEC3H | 723811    |
| Apolipoprotein B receptor                                           | APOBR    | 705950    |
| Apolipoprotein M                                                    | APOM     | 715848    |
| Apolipoprotein O                                                    | APOO     | 698137    |
| Apolipoprotein O-like                                               | APOOL    | 693763    |
| Apoptosis inducing factor, mitochondria associated 1                | AIFM1    | 702773    |
| Apoptosis inducing factor, mitochondria associated 3                | AIFM3    | 100430576 |
| Apoptosis inhibitor 5                                               | API5     | 716346    |
| Apoptotic chromatin condensation inducer 1                          | ACIN1    | 713310    |
| Aprataxin                                                           | APTX     | 702671    |
| Arachidonate 12-lipoxygenase, 12R type                              | ALOX12B  | 721936    |
| Arachidonate 5-lipoxygenase-activating protein                      | ALOX5AP  | 713170    |
| Arachidonate lipoxygenase 3                                         | ALOXE3   | 716840    |
| Aralkylamine N-acetyltransferase                                    | AANAT    | 706924    |
| Arfgap with gtpase domain, ankyrin repeat and PH domain 1           | AGAP1    | 693652    |
| Arfgap with rhogap domain, ankyrin repeat and PH domain 2           | ARAP2    | 702115    |
| Arfgap with rhogap domain, ankyrin repeat and PH domain 3           | ARAP3    | 701400    |
| Arginine and glutamate rich 1                                       | ARGLU1   | 702840    |
| Arginine/serine-rich coiled-coil 1                                  | RSRC1    | 704232    |
| Arginine/serine-rich coiled-coil 2                                  | RSRC2    | 706564    |
| Arginine/serine-rich protein 1                                      | RSRP1    | 712757    |
| Arginine-glutamic acid dipeptide (RE) repeats                       | RERE     | 708902    |
| Argininosuccinate lyase                                             | ASL      | 697109    |
| Arginyl aminopeptidase (aminopeptidase B)                           | RNPEP    | 706696    |
| Arginyltransferase 1                                                | ATE1     | 705248    |

|                                                                  |        |           |
|------------------------------------------------------------------|--------|-----------|
| Arginyl-trna synthetase                                          | RARS   | 698998    |
| Arginyl-trna synthetase 2, mitochondrial                         | RARS2  | 699240    |
| Armadillo repeat containing 1                                    | ARMC1  | 702079    |
| Armadillo repeat containing 3                                    | ARMC3  | 705015    |
| Armadillo repeat containing 5                                    | ARMC5  | 715103    |
| Armadillo repeat containing 8                                    | ARMC8  | 716388    |
| Armadillo repeat containing 9                                    | ARMC9  | 711891    |
| Armadillo repeat containing, X-linked 1                          | ARMCX1 | 704620    |
| Armadillo repeat containing, X-linked 3                          | ARMCX3 | 704035    |
| Armadillo repeat containing, X-linked 5                          | ARMCX5 | 100427776 |
| ARP1 actin-related protein 1 homolog A, centractin alpha (yeast) | ACTR1A | 713513    |
| ARP1 actin-related protein 1 homolog B, centractin beta (yeast)  | ACTR1B | 707328    |
| ARP2 actin-related protein 2 homolog (yeast)                     | ACTR2  | 697080    |
| ARP3 actin-related protein 3 homolog B (yeast)                   | ACTR3B | 715965    |
| ARP5 actin-related protein 5 homolog (yeast)                     | ACTR5  | 698191    |
| Arrestin, beta 1                                                 | ARRB1  | 695250    |
| Arrestin, beta 2                                                 | ARRB2  | 709399    |
| Arsa arsenite transporter, ATP-binding, homolog 1 (bacterial)    | ASNA1  | 717734    |
| Artemin                                                          | ARTN   | 701641    |
| ARV1 homolog, fatty acid homeostasis modulator                   | ARV1   | 713975    |
| Aryl hydrocarbon receptor nuclear translocator 2                 | ARNT2  | 712786    |
| Aryl hydrocarbon receptor nuclear translocator like              | ARNTL  | 700464    |
| Arylsulfatase A                                                  | ARSA   | 716500    |
| Arylsulfatase E (chondrodysplasia punctata 1)                    | ARSE   | 720575    |
| Ash2 (absent, small, or homeotic)-like (Drosophila)              | ASH2L  | 699382    |
| Asparaginase like 1                                              | ASRGL1 | 718871    |
| Asparagine synthetase (glutamine-hydrolyzing)                    | ASNS   | 697232    |
| Asparaginyl-trna synthetase 2, mitochondrial (putative)          | NARS2  | 700326    |
| Aspartate beta-hydroxylase domain containing 1                   | ASPHD1 | 707467    |
| Aspartate dehydrogenase domain containing                        | ASPDH  | 719609    |
| Aspartyl aminopeptidase                                          | DNPEP  | 703180    |
| Asteroid homolog 1 (Drosophila)                                  | ASTE1  | 719271    |
| Ataxin 10                                                        | ATXN10 | 713805    |
| Ataxin 2-like                                                    | ATXN2L | 708359    |
| AT-hook containing transcription factor 1                        | AHCTF1 | 702705    |
| Atlastin gtpase 1                                                | ATL1   | 706313    |
| Atlastin gtpase 2                                                | ATL2   | 710647    |
| ATP binding cassette subfamily A member 4                        | ABCA4  | 714054    |
| ATP binding cassette subfamily A member 5                        | ABCA5  | 693795    |
| ATP binding cassette subfamily A member 7                        | ABCA7  | 704976    |
| ATP binding cassette subfamily B member 10                       | ABCB10 | 574117    |
| ATP binding cassette subfamily B member 7                        | ABCB7  | 704034    |
| ATP binding cassette subfamily C member 5                        | ABCC5  | 704326    |
| ATP binding cassette subfamily C member 8                        | ABCC8  | 654490    |
| ATP binding cassette subfamily E member 1                        | ABCE1  | 701945    |
| ATP binding cassette subfamily F member 1                        | ABCF1  | 711864    |
| ATP binding cassette subfamily F member 3                        | ABCF3  | 703319    |
| ATP binding cassette subfamily G member 2 (Junior blood group)   | ABCG2  | 574307    |

|                                                                                                      |          |           |
|------------------------------------------------------------------------------------------------------|----------|-----------|
| ATP binding cassette subfamily G member 8                                                            | ABCG8    | 713676    |
| ATP citrate lyase                                                                                    | ACLY     | 708501    |
| ATP synthase F0 subunit 6                                                                            | ATP6     | 2846629   |
| ATP synthase, H <sup>+</sup> transporting, mitochondrial F1 complex, alpha subunit 1, cardiac muscle | ATP5A1   | 701389    |
| ATP synthase, H <sup>+</sup> transporting, mitochondrial F1 complex, beta polypeptide                | ATP5B    | 713284    |
| ATP synthase, H <sup>+</sup> transporting, mitochondrial F1 complex, delta subunit                   | ATP5D    | 705944    |
| ATP synthase, H <sup>+</sup> transporting, mitochondrial F1 complex, gamma polypeptide 1             | ATP5C1   | 713768    |
| ATP synthase, H <sup>+</sup> transporting, mitochondrial F1 complex, O subunit                       | ATP5O    | 698480    |
| ATP synthase, H <sup>+</sup> transporting, mitochondrial Fo complex subunit C1 (subunit 9)           | ATP5G1   | 697950    |
| ATP synthase, H <sup>+</sup> transporting, mitochondrial Fo complex subunit C2 (subunit 9)           | ATP5G2   | 703751    |
| ATP synthase, H <sup>+</sup> transporting, mitochondrial Fo complex subunit D                        | ATP5H    | 700338    |
| ATP synthase, H <sup>+</sup> transporting, mitochondrial Fo complex subunit F6                       | ATP5J    | 708411    |
| ATPase family, AAA domain containing 1                                                               | ATAD1    | 704809    |
| ATPase family, AAA domain containing 2                                                               | ATAD2    | 704478    |
| ATPase inhibitory factor 1                                                                           | ATPIF1   | 716870    |
| ATPase type 13A1                                                                                     | ATP13A1  | 100427504 |
| ATPase type 13A2                                                                                     | ATP13A2  | 699678    |
| ATPase, aminophospholipid transporter (APLT), class I, type 8A, member 1                             | ATP8A1   | 702630    |
| ATPase, Ca <sup>++</sup> transporting, plasma membrane 1                                             | ATP2B1   | 709102    |
| ATPase, H <sup>+</sup> transporting V0 subunit e2                                                    | ATP6V0E2 | 712644    |
| ATPase, H <sup>+</sup> transporting, lysosomal 13kda, V1 subunit G1                                  | ATP6V1G1 | 703655    |
| ATPase, H <sup>+</sup> transporting, lysosomal 14kda, V1 subunit F                                   | ATP6V1F  | 702112    |
| ATPase, H <sup>+</sup> transporting, lysosomal 21kda, V0 subunit b                                   | ATP6V0B  | 702243    |
| ATPase, H <sup>+</sup> transporting, lysosomal 31kda, V1 subunit E1                                  | ATP6V1E1 | 709739    |
| ATPase, H <sup>+</sup> transporting, lysosomal 56/58kda, V1 subunit B2                               | ATP6V1B2 | 705605    |
| ATPase, H <sup>+</sup> transporting, lysosomal 9kda, V0 subunit e1                                   | ATP6V0E1 | 703342    |
| ATPase, H <sup>+</sup> transporting, lysosomal accessory protein 2                                   | ATP6AP2  | 705048    |
| ATPase, H <sup>+</sup> /K <sup>+</sup> exchanging, alpha polypeptide                                 | ATP4A    | 100426216 |
| ATPase, Na <sup>+</sup> /K <sup>+</sup> transporting, alpha 1 polypeptide                            | ATP1A1   | 710368    |
| ATPase, Na <sup>+</sup> /K <sup>+</sup> transporting, beta 3 polypeptide                             | ATP1B3   | 716682    |
| ATR interacting protein                                                                              | ATRIP    | 710035    |
| ATR serine/threonine kinase                                                                          | ATR      | 714443    |
| AT-rich interaction domain 3A                                                                        | ARID3A   | 704435    |
| AT-rich interaction domain 4B                                                                        | ARID4B   | 718320    |
| Atypical chemokine receptor 4                                                                        | ACKR4    | 717701    |
| AU RNA binding protein/enoyl-coa hydratase                                                           | AUH      | 704542    |
| Aurora kinase A interacting protein 1                                                                | AURKAIP1 | 706329    |
| Aurora kinase B                                                                                      | AURKB    | 721955    |
| Aurora kinase C                                                                                      | AURKC    | 709801    |
| Autocrine motility factor receptor, E3 ubiquitin protein ligase                                      | AMFR     | 699972    |
| Autophagy related 101                                                                                | ATG101   | 696954    |

|                                                                      |          |        |
|----------------------------------------------------------------------|----------|--------|
| Autophagy related 16 like 1                                          | ATG16L1  | 714092 |
| Autophagy related 16 like 2                                          | ATG16L2  | 717952 |
| Autophagy related 2A                                                 | ATG2A    | 717290 |
| Autophagy related 3                                                  | ATG3     | 708305 |
| Autophagy related 4A, cysteine peptidase                             | ATG4A    | 703367 |
| Autophagy related 4D, cysteine peptidase                             | ATG4D    | 713111 |
| Autophagy related 5                                                  | ATG5     | 696874 |
| Autophagy related 7                                                  | ATG7     | 696238 |
| Autophagy related 9A                                                 | ATG9A    | 702263 |
| Autophagy/beclin-1 regulator 1                                       | AMBRA1   | 714434 |
| B9 protein domain 1                                                  | B9D1     | 702949 |
| B9 protein domain 2                                                  | B9D2     | 704873 |
| Baculoviral IAP repeat containing 2                                  | BIRC2    | 702592 |
| Baculoviral IAP repeat containing 3                                  | BIRC3    | 702468 |
| BAI1-associated protein 2-like 2                                     | BAIAP2L2 | 700058 |
| Bardet-Biedl syndrome 10                                             | BBS10    | 693270 |
| Bardet-Biedl syndrome 2                                              | BBS2     | 700353 |
| Bardet-Biedl syndrome 4                                              | BBS4     | 704508 |
| Bardet-Biedl syndrome 5                                              | BBS5     | 709701 |
| Bardet-Biedl syndrome 9                                              | BBS9     | 708412 |
| Basic leucine zipper and W2 domains 1                                | BZW1     | 701731 |
| Basic leucine zipper and W2 domains 2                                | BZW2     | 714627 |
| Basic transcription factor 3                                         | BTF3     | 703339 |
| Basic transcription factor 3-like 4                                  | BTF3L4   | 712955 |
| B-cell CLL/lymphoma 2                                                | BCL2     | 707407 |
| B-cell CLL/lymphoma 6                                                | BCL6     | 708736 |
| B-cell CLL/lymphoma 7B                                               | BCL7B    | 716470 |
| B-cell CLL/lymphoma 7C                                               | BCL7C    | 712065 |
| B-cell CLL/lymphoma 9                                                | BCL9     | 700800 |
| B-cell receptor-associated protein 31                                | BCAP31   | 696663 |
| B-cell translocation gene 1, anti-proliferative                      | BTG1     | 710112 |
| BCL2 associated athanogene 2                                         | BAG2     | 712778 |
| BCL2/adenovirus E1B 19kda interacting protein 1                      | BNIP1    | 703576 |
| BCL2-antagonist/killer 1                                             | BAK1     | 706534 |
| BCL2-associated X protein                                            | BAX      | 718948 |
| BCL2-like 1                                                          | BCL2L1   | 713035 |
| BCL2-like 13 (apoptosis facilitator)                                 | BCL2L13  | 709825 |
| BCL2-like 14 (apoptosis facilitator)                                 | BCL2L14  | 695971 |
| BCS1-like (S. Cerevisiae)                                            | BCS1L    | 699690 |
| Beclin 1, autophagy related                                          | BECN1    | 711649 |
| BEN domain containing 6                                              | BEND6    | 712498 |
| Bestrophin 1                                                         | BEST1    | 718993 |
| Beta 3-glucosyltransferase                                           | B3GLCT   | 713498 |
| Beta-1,3-galactosyltransferase 4                                     | B3GALT4  | 718178 |
| Beta-1,3-glucuronyltransferase 3                                     | B3GAT3   | 718744 |
| Beta-1,3-N-acetylgalactosaminyltransferase 1 (globoside blood group) | B3GALNT1 | 703939 |
| Beta-1,4-glucuronyltransferase 1                                     | B4GAT1   | 714270 |
| Beta-1,4-N-acetyl-galactosaminyl transferase 1                       | B4GALNT1 | 715317 |



|                                                                         |        |        |
|-------------------------------------------------------------------------|--------|--------|
| Beta-2-microglobulin                                                    | B2M    | 712428 |
| Beta-site APP-cleaving enzyme 1                                         | BACE1  | 697694 |
| Bicaudal D homolog 2 (Drosophila)                                       | BICD2  | 706621 |
| Bifunctional apoptosis regulator                                        | BFAR   | 713053 |
| Biliverdin reductase A                                                  | BLVRA  | 700980 |
| Bisphosphoglycerate mutase                                              | BPGM   | 706741 |
| Bladder cancer associated protein                                       | BLCAP  | 708044 |
| BLOC-1 related complex subunit 5                                        | BORCS5 | 696469 |
| Bloom syndrome, recq helicase-like                                      | BLM    | 703460 |
| BMP and activin membrane-bound inhibitor                                | BAMBI  | 710152 |
| Bola family member 1                                                    | BOLA1  | 705297 |
| Bola family member 3                                                    | BOLA3  | 707871 |
| Bone morphogenetic protein 1                                            | BMP1   | 707596 |
| Bone morphogenetic protein 4                                            | BMP4   | 694618 |
| Bone morphogenetic protein 7                                            | BMP7   | 696948 |
| Bone morphogenetic protein receptor type IA                             | BMPR1A | 696898 |
| Bone morphogenetic protein/retinoic acid inducible neural-specific 1    | BRINP1 | 701794 |
| Bora, aurora kinase A activator                                         | BORA   | 693798 |
| BPI fold containing family A member 2                                   | BPIFA2 | 710376 |
| Brain and reproductive organ-expressed (TNFRSF1A modulator)             | BRE    | 702365 |
| Brain protein I3                                                        | BRI3   | 706525 |
| Brain-derived neurotrophic factor                                       | BDNF   | 701245 |
| Branched chain amino-acid transaminase 2, mitochondrial                 | BCAT2  | 718305 |
| Branched chain keto acid dehydrogenase E1, beta polypeptide             | BCKDHB | 718472 |
| Branched chain ketoacid dehydrogenase kinase                            | BCKDK  | 712985 |
| BRCA1 associated RING domain 1                                          | BARD1  | 694301 |
| BRCA2 and CDKN1A interacting protein                                    | BCCIP  | 699437 |
| Breast cancer metastasis suppressor 1                                   | BRMS1  | 714212 |
| Breast cancer metastasis-suppressor 1-like                              | BRMS1L | 695909 |
| Breast carcinoma amplified sequence 3                                   | BCAS3  | 712846 |
| BRF1, RNA polymerase III transcription initiation factor 90 kda subunit | BRF1   | 709533 |
| BRISC and BRCA1 A complex member 1                                      | BABAM1 | 718969 |
| Bromo adjacent homology domain containing 1                             | BAHD1  | 702982 |
| Bromodomain adjacent to zinc finger domain 1B                           | BAZ1B  | 716436 |
| Bromodomain and PHD finger containing 3                                 | BRPF3  | 718997 |
| Bromodomain containing 1                                                | BRD1   | 715059 |
| Bromodomain containing 2                                                | BRD2   | 717893 |
| Bromodomain containing 3                                                | BRD3   | 713107 |
| Bromodomain containing 7                                                | BRD7   | 694850 |
| Bromodomain containing 9                                                | BRD9   | 709235 |
| BRX1, biogenesis of ribosomes                                           | BRX1   | 698745 |
| BSD domain containing 1                                                 | BSDC1  | 708083 |
| BTB (POZ) domain containing 1                                           | BTBD1  | 718696 |
| BTB (POZ) domain containing 10                                          | BTBD10 | 700325 |
| BTB (POZ) domain containing 11                                          | BTBD11 | 704916 |
| BTB and CNC homology 1, basic leucine zipper transcription factor 1     | BACH1  | 705817 |
| BTG family member 3                                                     | BTG3   | 710579 |
| BTG3 associated nuclear protein                                         | BANP   | 696125 |

|                                                                   |           |        |
|-------------------------------------------------------------------|-----------|--------|
| BUB1, mitotic checkpoint serine/threonine kinase                  | BUB1      | 696598 |
| BUB3 mitotic checkpoint protein                                   | BUB3      | 708033 |
| BUD31 homolog                                                     | BUD31     | 718694 |
| Butyrophilin subfamily 2 member A2                                | BTN2A2    | 699861 |
| Bystin like                                                       | BYSL      | 694976 |
| C1GALT1 specific chaperone 1                                      | C1GALT1C1 | 696662 |
| C2CD2-like                                                        | C2CD2L    | 703424 |
| C3 and PZP-like, alpha-2-macroglobulin domain containing 8        | CPAMD8    | 719660 |
| Cache domain containing 1                                         | CACHD1    | 701608 |
| Cadherin 11, type 2, OB-cadherin (osteoblast)                     | CDH11     | 708826 |
| Cadherin 13                                                       | CDH13     | 718038 |
| Cadherin 2, type 1, N-cadherin (neuronal)                         | CDH2      | 711526 |
| Cadherin 24, type 2                                               | CDH24     | 713241 |
| Cadherin 5, type 2 (vascular endothelium)                         | CDH5      | 693297 |
| Cadherin related family member 2                                  | CDHR2     | 697249 |
| Calcitonin-related polypeptide alpha                              | CALCA     | 700649 |
| Calcium activated nucleotidase 1                                  | CANT1     | 710935 |
| Calcium and integrin binding 1                                    | CIB1      | 701842 |
| Calcium and integrin binding family member 2                      | CIB2      | 709429 |
| Calcium binding protein 39                                        | CAB39     | 711166 |
| Calcium binding protein 39 like                                   | CAB39L    | 706066 |
| Calcium binding protein 5                                         | CABP5     | 718484 |
| Calcium homeostasis endoplasmic reticulum protein                 | CHERP     | 718689 |
| Calcium regulated heat stable protein 1                           | CARHSP1   | 709224 |
| Calcium release activated channel regulator 2B                    | CRACR2B   | 700951 |
| Calcium/calmodulin-dependent protein kinase II delta              | CAMK2D    | 702504 |
| Calcium/calmodulin-dependent protein kinase II gamma              | CAMK2G    | 705980 |
| Calcium/calmodulin-dependent protein kinase II inhibitor 1        | CAMK2N1   | 705302 |
| Calcium/calmodulin-dependent protein kinase kinase 2, beta        | CAMKK2    | 699685 |
| Calcium/calmodulin-dependent serine protein kinase (MAGUK family) | CASK      | 707428 |
| Calcyclin binding protein                                         | CACYBP    | 709343 |
| Calcyon neuron-specific vesicular protein                         | CALY      | 702415 |
| Calcyphosine-like                                                 | CAPSL     | 699995 |
| Calmegin                                                          | CLGN      | 698361 |
| Calmin (calponin-like, transmembrane)                             | CLMN      | 709910 |
| Calmodulin like 6                                                 | CALML6    | 703514 |
| Calmodulin regulated spectrin associated protein family member 2  | CAMSAP2   | 709092 |
| Calnexin                                                          | CANX      | 704794 |
| Calpain 1, (mu/I) large subunit                                   | CAPN1     | 716618 |
| Calpain 10                                                        | CAPN10    | 716360 |
| Calpain 15                                                        | CAPN15    | 695881 |
| Calpain 3                                                         | CAPN3     | 707913 |
| Calpain 6                                                         | CAPN6     | 706434 |
| Calponin 3, acidic                                                | CNN3      | 709538 |
| Calreticulin                                                      | CALR      | 716910 |
| Calumenin                                                         | CALU      | 699730 |
| Camp responsive element binding protein 3                         | CREB3     | 696350 |
| Camp responsive element binding protein 3-like 4                  | CREB3L4   | 715951 |

|                                                                                  |          |           |
|----------------------------------------------------------------------------------|----------|-----------|
| Cancer susceptibility candidate 1                                                | CASC1    | 707753    |
| Cancer susceptibility candidate 3                                                | CASC3    | 699712    |
| Cannabinoid receptor interacting protein 1                                       | CNRIP1   | 698827    |
| Canopy FGF signaling regulator 3                                                 | CNPY3    | 100424672 |
| Canopy FGF signaling regulator 4                                                 | CNPY4    | 719080    |
| CAP, adenylate cyclase-associated protein 1 (yeast)                              | CAP1     | 693719    |
| CAP, adenylate cyclase-associated protein, 2 (yeast)                             | CAP2     | 703445    |
| CAP-Gly domain containing linker protein 3                                       | CLIP3    | 712058    |
| Capping protein (actin filament) muscle Z-line, alpha 1                          | CAPZA1   | 705653    |
| Capping protein (actin filament) muscle Z-line, alpha 2                          | CAPZA2   | 704662    |
| Capping protein (actin filament), gelsolin-like                                  | CAPG     | 695288    |
| Caprin family member 2                                                           | CAPRIN2  | 693594    |
| Carbamoyl-phosphate synthetase 2, aspartate transcarbamylase, and dihydroorotase | CAD      | 699460    |
| Carbohydrate (chondroitin 4) sulfotransferase 13                                 | CHST13   | 716548    |
| Carbohydrate (N-acetylgalactosamine 4-O) sulfotransferase 14                     | CHST14   | 703115    |
| Carbohydrate sulfotransferase 10                                                 | CHST10   | 709939    |
| Carbonic anhydrase II                                                            | CA2      | 574263    |
| Carbonic anhydrase IX                                                            | CA9      | 696729    |
| Carbonyl reductase 3                                                             | CBR3     | 695769    |
| Carboxypeptidase E                                                               | CPE      | 708881    |
| Carboxypeptidase N subunit 2                                                     | CPN2     | 106997192 |
| Carboxypeptidase Q                                                               | CPQ      | 701711    |
| Carboxypeptidase X (M14 family), member 2                                        | CPXM2    | 693465    |
| Carboxypeptidase, vitellogenic-like                                              | CPVL     | 697111    |
| Cardiotrophin 1                                                                  | CTF1     | 713850    |
| Cardiotrophin-like cytokine factor 1                                             | CLCF1    | 712554    |
| Carnitine O-acetyltransferase                                                    | CRAT     | 716908    |
| Carnitine palmitoyltransferase 1A (liver)                                        | CPT1A    | 709837    |
| Carnitine palmitoyltransferase 2                                                 | CPT2     | 714150    |
| Cartilage acidic protein 1                                                       | CRTAC1   | 707486    |
| CAS1 domain containing 1                                                         | CASD1    | 700222    |
| Casein kinase 1, alpha 1                                                         | CSNK1A1  | 710775    |
| Casein kinase 1, alpha 1-like                                                    | CSNK1A1L | 695190    |
| Casein kinase 1, gamma 3                                                         | CSNK1G3  | 701702    |
| Casein kinase 2, alpha 1 polypeptide                                             | CSNK2A1  | 714841    |
| Casein kinase 2, beta polypeptide                                                | CSNK2B   | 715807    |
| Caseinolytic mitochondrial matrix peptidase chaperone subunit                    | CLPX     | 708954    |
| CASK interacting protein 2                                                       | CASKIN2  | 702477    |
| Caspase 1                                                                        | CASP1    | 706568    |
| Caspase 4                                                                        | CASP4    | 704864    |
| Caspase 8 associated protein 2                                                   | CASP8AP2 | 702294    |
| Caspase 9                                                                        | CASP9    | 694544    |
| Caspase recruitment domain family member 9                                       | CARD9    | 710485    |
| Cat eye syndrome chromosome region, candidate 5                                  | CECR5    | 709197    |
| Catalase                                                                         | CAT      | 717406    |
| Catechol-O-methyltransferase                                                     | COMT     | 712548    |
| Catechol-O-methyltransferase domain containing 1                                 | COMTD1   | 704152    |

|                                                                                   |            |           |
|-----------------------------------------------------------------------------------|------------|-----------|
| Catenin alpha 1                                                                   | CTNNA1     | 574385    |
| Catenin alpha 2                                                                   | CTNNA2     | 712135    |
| Catenin alpha-like 1                                                              | CTNNAL1    | 710389    |
| Catenin beta 1                                                                    | CTNNB1     | 574265    |
| Catenin beta interacting protein 1                                                | CTNNBIP1   | 712257    |
| Catenin beta like 1                                                               | CTNNBL1    | 700310    |
| Cathelicidin antimicrobial peptide                                                | CAMP       | 619186    |
| Cathepsin B                                                                       | CTSB       | 100424760 |
| Cathepsin C                                                                       | CTSC       | 705320    |
| Catsper channel auxiliary subunit gamma                                           | CATSPERG   | 714958    |
| Caveolin 2                                                                        | CAV2       | 706980    |
| Cbl proto-oncogene B, E3 ubiquitin protein ligase                                 | CBLB       | 703879    |
| Cbl proto-oncogene-like 1, E3 ubiquitin protein ligase                            | CBL1       | 699980    |
| Cbp/p300-interacting transactivator, with Glu/Asp rich carboxy-terminal domain, 1 | CITED1     | 703165    |
| CCAAT/enhancer binding protein (C/EBP), zeta                                      | CEBPZ      | 712090    |
| CCR4-NOT transcription complex subunit 1                                          | CNOT1      | 712880    |
| CCR4-NOT transcription complex subunit 10                                         | CNOT10     | 704986    |
| CCR4-NOT transcription complex subunit 3                                          | CNOT3      | 693292    |
| CCR4-NOT transcription complex subunit 7                                          | CNOT7      | 702192    |
| CCR4-NOT transcription complex subunit 8                                          | CNOT8      | 714813    |
| CD14 molecule                                                                     | CD14       | 697482    |
| CD19 molecule                                                                     | CD19       | 705211    |
| CD1c molecule                                                                     | CD1C       | 717148    |
| CD2 (cytoplasmic tail) binding protein 2                                          | CD2BP2     | 709961    |
| CD200 molecule                                                                    | CD200      | 708110    |
| CD248 molecule, endosialin                                                        | CD248      | 714375    |
| CD2-associated protein                                                            | CD2AP      | 705221    |
| CD3e molecule, epsilon associated protein                                         | CD3EAP     | 714440    |
| CD4 molecule                                                                      | CD4        | 713807    |
| CD40 molecule, TNF receptor superfamily member 5                                  | CD40       | 707749    |
| CD44 molecule (Indian blood group)                                                | CD44       | 717204    |
| CD52 molecule                                                                     | CD52       | 714429    |
| CD53 molecule                                                                     | CD53       | 702350    |
| CD58 molecule                                                                     | CD58       | 710732    |
| CD63 molecule                                                                     | CD63       | 709828    |
| CD79b molecule                                                                    | CD79B      | 718218    |
| CD81 molecule                                                                     | CD81       | 704961    |
| CD83 molecule                                                                     | CD83       | 701825    |
| CD9 molecule                                                                      | CD9        | 712262    |
| CDC like kinase 1                                                                 | CLK1       | 700320    |
| CDC like kinase 3                                                                 | CLK3       | 702511    |
| CDC28 protein kinase regulatory subunit 1B                                        | CKS1B      | 717164    |
| CDC28 protein kinase regulatory subunit 2                                         | CKS2       | 697324    |
| CDC42 small effector 1                                                            | CDC42SE1   | 100427784 |
| CDGSH iron sulfur domain 1                                                        | CISD1      | 701716    |
| CDKN2A interacting protein                                                        | CDKN2AIP   | 701583    |
| CDKN2A interacting protein N-terminal like                                        | CDKN2AIPNL | 710774    |

|                                                        |         |           |
|--------------------------------------------------------|---------|-----------|
| CDP-diacylglycerol--inositol 3-phosphatidyltransferase | CDIPT   | 707141    |
| Cell cycle and apoptosis regulator 2                   | CCAR2   | 716288    |
| Cell death-inducing DFFA-like effector b               | CIDEB   | 100425328 |
| Cell division cycle 123                                | CDC123  | 694239    |
| Cell division cycle 16                                 | CDC16   | 699089    |
| Cell division cycle 20                                 | CDC20   | 702317    |
| Cell division cycle 23                                 | CDC23   | 714000    |
| Cell division cycle 25C                                | CDC25C  | 714115    |
| Cell division cycle 26                                 | CDC26   | 706165    |
| Cell division cycle 37                                 | CDC37   | 715390    |
| Cell division cycle 37-like 1                          | CDC37L1 | 694831    |
| Cell division cycle 5 like                             | CDC5L   | 703099    |
| Cell division cycle 7                                  | CDC7    | 704730    |
| Cell division cycle and apoptosis regulator 1          | CCAR1   | 693585    |
| Cell division cycle associated 3                       | CDCA3   | 722088    |
| Cell division cycle associated 5                       | CDCA5   | 721998    |
| Cell division cycle associated 7                       | CDCA7   | 696474    |
| Cell division cycle associated 8                       | CDCA8   | 719808    |
| Cell growth regulator with ring finger domain 1        | CGRRF1  | 695231    |
| Cell wall biogenesis 43 C-terminal homolog             | CWH43   | 706415    |
| Centrin 2                                              | CETN2   | 693376    |
| Centrin 3                                              | CETN3   | 695223    |
| Centriolin                                             | CNTRL   | 700200    |
| Centrobin, centrosomal BRCA2 interacting protein       | CNTROB  | 716660    |
| Centromere protein A                                   | CENPA   | 697312    |
| Centromere protein C                                   | CENPC   | 710620    |
| Centromere protein F                                   | CENPF   | 709000    |
| Centromere protein J                                   | CENPJ   | 721498    |
| Centromere protein M                                   | CENPM   | 709006    |
| Centromere protein O                                   | CENPO   | 693599    |
| Centromere protein Q                                   | CENPQ   | 721027    |
| Centromere protein W                                   | CENPW   | 712570    |
| Centrosomal protein 112kda                             | CEP112  | 718585    |
| Centrosomal protein 170kda                             | CEP170  | 705427    |
| Centrosomal protein 192kda                             | CEP192  | 722121    |
| Centrosomal protein 290kda                             | CEP290  | 708286    |
| Centrosomal protein 350kda                             | CEP350  | 716537    |
| Centrosomal protein 41kda                              | CEP41   | 703215    |
| Centrosomal protein 55kda                              | CEP55   | 699890    |
| Centrosomal protein 57kda-like 1                       | CEP57L1 | 700109    |
| Centrosomal protein 63kda                              | CEP63   | 717266    |
| Centrosomal protein 70kda                              | CEP70   | 716263    |
| Centrosomal protein 72kda                              | CEP72   | 708753    |
| Centrosomal protein 83kda                              | CEP83   | 711408    |
| Centrosomal protein 85kda                              | CEP85   | 714264    |
| Centrosomal protein 95kda                              | CEP95   | 718348    |
| Centrosomal protein 97kda                              | CEP97   | 702482    |
| Ceramide synthase 2                                    | CERS2   | 716180    |

|                                                                               |            |           |
|-------------------------------------------------------------------------------|------------|-----------|
| Ceramide synthase 4                                                           | CERS4      | 706728    |
| Ceramide synthase 5                                                           | CERS5      | 713449    |
| Ceramide synthase 6                                                           | CERS6      | 704953    |
| Cerebellar degeneration related protein 2                                     | CDR2       | 698974    |
| Cerebellin 4 precursor                                                        | CBLN4      | 698567    |
| Cerebral cavernous malformation 2                                             | CCM2       | 705037    |
| Ceroid-lipofuscinosis, neuronal 6, late infantile, variant                    | CLN6       | 693873    |
| CGG triplet repeat binding protein 1                                          | CGGBP1     | 693920    |
| Chaperonin containing TCP1, subunit 2 (beta)                                  | CCT2       | 717182    |
| Chaperonin containing TCP1, subunit 3 (gamma)                                 | CCT3       | 718374    |
| Chaperonin containing TCP1, subunit 8 (theta)                                 | CCT8       | 706184    |
| Charged multivesicular body protein 1B                                        | CHMP1B     | 100425080 |
| Charged multivesicular body protein 2A                                        | CHMP2A     | 712059    |
| Charged multivesicular body protein 4B                                        | CHMP4B     | 709004    |
| Charged multivesicular body protein 6                                         | CHMP6      | 718353    |
| Checkpoint kinase 2                                                           | CHEK2      | 713668    |
| Checkpoint with forkhead and ring finger domains, E3 ubiquitin protein ligase | CHFR       | 694297    |
| Chemokine (C-C motif) ligand 25                                               | CCL25      | 574219    |
| Chemokine (C-C motif) ligand 27                                               | CCL27      | 574220    |
| Chemokine (C-X-C motif) receptor 4                                            | CXCR4      | 707329    |
| Chemokine-like factor                                                         | CKLF       | 693673    |
| Chitinase 1                                                                   | CHIT1      | 703286    |
| Chitobiase, di-N-acetyl-                                                      | CTBS       | 710366    |
| Chloride channel, voltage-sensitive 2                                         | CLCN2      | 704709    |
| Chloride channel, voltage-sensitive 6                                         | CLCN6      | 714793    |
| Chloride intracellular channel 4                                              | CLIC4      | 712337    |
| Choline kinase beta                                                           | CHKB       | 716377    |
| Choline/ethanolamine phosphotransferase 1                                     | CEPT1      | 702700    |
| Cholinergic receptor, nicotinic alpha 7                                       | CHRNA7     | 574230    |
| Chondroitin polymerizing factor                                               | CHPF       | 703860    |
| Chondroitin sulfate N-acetylgalactosaminyltransferase 2                       | CSGALNACT2 | 703703    |
| Chordin                                                                       | CHRD       | 702281    |
| Chromatin accessibility complex 1                                             | CHRA1      | 700384    |
| Chromatin target of PRMT1                                                     | CHTOP      | 715501    |
| Chromobox 1                                                                   | CBX1       | 696673    |
| Chromobox 5                                                                   | CBX5       | 703477    |
| Chromobox 7                                                                   | CBX7       | 703056    |
| Chromodomain helicase DNA binding protein 1                                   | CHD1       | 702070    |
| Chromodomain helicase DNA binding protein 3                                   | CHD3       | 716508    |
| Chromodomain helicase DNA binding protein 4                                   | CHD4       | 713162    |
| Chromodomain helicase DNA binding protein 9                                   | CHD9       | 696367    |
| Chromodomain protein, Y-like                                                  | CDYL       | 722957    |
| Chromosome 1 open reading frame, human c1orf123                               | C1H1orf123 | 714201    |
| Chromosome 1 open reading frame, human c1orf131                               | C1H1orf131 | 719141    |
| Chromosome 1 open reading frame, human c1orf198                               | C1H1orf198 | 714084    |
| Chromosome 1 open reading frame, human c1orf35                                | C1H1orf35  | 695723    |
| Chromosome 1 open reading frame, human c1orf50                                | C1H1orf50  | 698058    |

|                                                  |             |           |
|--------------------------------------------------|-------------|-----------|
| Chromosome 1 open reading frame, human c1orf52   | C1H1orf52   | 711232    |
| Chromosome 1 open reading frame, human c1orf54   | C1H1orf54   | 107000832 |
| Chromosome 1 open reading frame, human c1orf74   | C1H1orf74   | 713029    |
| Chromosome 1 open reading frame, human c1orf87   | C1H1orf87   | 693884    |
| Chromosome 10 open reading frame, human c20orf27 | C10H20orf27 | 717525    |
| Chromosome 10 open reading frame, human c20orf85 | C10H20orf85 | 695728    |
| Chromosome 10 open reading frame, human c22orf15 | C10H22orf15 | 698813    |
| Chromosome 10 open reading frame, human c22orf23 | C10H22orf23 | 699449    |
| Chromosome 11 open reading frame, human c12orf10 | C11H12orf10 | 702255    |
| Chromosome 11 open reading frame, human c12orf4  | C11H12orf4  | 710836    |
| Chromosome 11 open reading frame, human c12orf45 | C11H12orf45 | 701291    |
| Chromosome 11 open reading frame, human c12orf57 | C11H12orf57 | 714482    |
| Chromosome 12 open reading frame, human c2orf47  | C12H2orf47  | 699322    |
| Chromosome 13 open reading frame, human c2orf44  | C13H2orf44  | 703861    |
| Chromosome 13 open reading frame, human c2orf49  | C13H2orf49  | 713165    |
| Chromosome 14 open reading frame, human c11orf49 | C14H11orf49 | 713981    |
| Chromosome 14 open reading frame, human c11orf52 | C14H11orf52 | 100423640 |
| Chromosome 14 open reading frame, human c11orf68 | C14H11orf68 | 715318    |
| Chromosome 14 open reading frame, human c11orf73 | C14H11orf73 | 704098    |
| Chromosome 14 open reading frame, human c11orf74 | C14H11orf74 | 716798    |
| Chromosome 15 open reading frame, human c9orf135 | C15H9orf135 | 700202    |
| Chromosome 15 open reading frame, human c9orf142 | C15H9orf142 | 707874    |
| Chromosome 15 open reading frame, human c9orf16  | C15H9orf16  | 722628    |
| Chromosome 15 open reading frame, human c9orf24  | C15H9orf24  | 701552    |
| Chromosome 15 open reading frame, human c9orf72  | C15H9orf72  | 706828    |
| Chromosome 15 open reading frame, human c9orf9   | C15H9orf9   | 714749    |
| Chromosome 16 open reading frame, human c17orf49 | C16H17orf49 | 713820    |
| Chromosome 16 open reading frame, human c17orf53 | C16H17orf53 | 711524    |
| Chromosome 16 open reading frame, human c17orf62 | C16H17orf62 | 716212    |
| Chromosome 18 open reading frame, human c18orf21 | C18H18orf21 | 715440    |
| Chromosome 19 open reading frame, human c19orf24 | C19H19orf24 | 706393    |
| Chromosome 19 open reading frame, human c19orf43 | C19H19orf43 | 716466    |
| Chromosome 19 open reading frame, human c19orf47 | C19H19orf47 | 701191    |
| Chromosome 19 open reading frame, human c19orf52 | C19H19orf52 | 713825    |
| Chromosome 19 open reading frame, human c19orf53 | C19H19orf53 | 720745    |
| Chromosome 19 open reading frame, human c19orf66 | C19H19orf66 | 714622    |
| Chromosome 2 open reading frame, human c3orf14   | C2H3orf14   | 699965    |
| Chromosome 2 open reading frame, human c3orf18   | C2H3orf18   | 701675    |
| Chromosome 2 open reading frame, human c3orf52   | C2H3orf52   | 100430016 |
| Chromosome 20 open reading frame 24 ortholog     | C10H20orf24 | 709696    |
| Chromosome 20 open reading frame, human c16orf13 | C20H16orf13 | 696495    |
| Chromosome 20 open reading frame, human c16orf62 | C20H16orf62 | 695027    |
| Chromosome 20 open reading frame, human c16orf87 | C20H16orf87 | 716218    |
| Chromosome 3 open reading frame, human c21orf59  | C3H21orf59  | 700721    |
| Chromosome 3 open reading frame, human c21orf91  | C3H21orf91  | 710406    |
| Chromosome 3 open reading frame, human c7orf25   | C3H7orf25   | 708455    |
| Chromosome 3 open reading frame, human c7orf50   | C3H7orf50   | 696867    |
| Chromosome 4 open reading frame, human c6orf1    | C4H6orf1    | 718551    |

|                                                    |             |           |
|----------------------------------------------------|-------------|-----------|
| Chromosome 4 open reading frame, human c6orf136    | C4H6orf136  | 712108    |
| Chromosome 4 open reading frame, human c6orf203    | C4H6orf203  | 698108    |
| Chromosome 4 open reading frame, human c6orf89     | C4H6orf89   | 719165    |
| Chromosome 5 open reading frame, human c4orf27     | C5H4orf27   | 694607    |
| Chromosome 6 open reading frame, human c5orf15     | C6H5orf15   | 709969    |
| Chromosome 6 open reading frame, human c5orf22     | C6H5orf22   | 695901    |
| Chromosome 6 open reading frame, human c5orf28     | C6H5orf28   | 100430288 |
| Chromosome 6 open reading frame, human c5orf30     | C6H5orf30   | 703692    |
| Chromosome 6 open reading frame, human c5orf34     | C6H5orf34   | 700618    |
| Chromosome 7 open reading frame, human c14orf142   | C7H14orf142 | 704509    |
| Chromosome 7 open reading frame, human c14orf166   | C7H14orf166 | 710094    |
| Chromosome 7 open reading frame, human c14orf80    | C7H14orf80  | 699883    |
| Chromosome 7 open reading frame, human c15orf52    | C7H15orf52  | 702304    |
| Chromosome 7 open reading frame, human c15orf57    | C7H15orf57  | 703343    |
| Chromosome 8 open reading frame, human c8orf46     | C8H8orf46   | 703243    |
| Chromosome 8 open reading frame, human c8orf48     | C8H8orf48   | 700746    |
| Chromosome 8 open reading frame, human c8orf59     | C8H8orf59   | 703464    |
| Chromosome 8 open reading frame, human c8orf76     | C8H8orf76   | 704150    |
| Chromosome 9 open reading frame, human c10orf107   | C9H10orf107 | 700172    |
| Chromosome 9 open reading frame, human c10orf2     | C9H10orf2   | 710958    |
| Chromosome 9 open reading frame, human c10orf88    | C9H10orf88  | 707385    |
| Chromosome alignment maintaining phosphoprotein 1  | CHAMP1      | 699474    |
| Chromosome X open reading frame, human cxorf38     | CXHXorf38   | 699271    |
| Chromosome X open reading frame, human cxorf40a    | CXHXorf40A  | 702659    |
| Chromosome X open reading frame, human cxorf57     | CXHXorf57   | 700757    |
| Chymotrypsinogen B2                                | CTRB2       | 711100    |
| Cilia and flagella associated protein 100          | CFAP100     | 716433    |
| Cilia and flagella associated protein 161          | CFAP161     | 713184    |
| Cilia and flagella associated protein 20           | CFAP20      | 706737    |
| Cilia and flagella associated protein 43           | CFAP43      | 716031    |
| Cilia and flagella associated protein 45           | CFAP45      | 720125    |
| Cilia and flagella associated protein 52           | CFAP52      | 722040    |
| Cilia and flagella associated protein 53           | CFAP53      | 700084    |
| Cilia and flagella associated protein 65           | CFAP65      | 701296    |
| Cilia and flagella associated protein 70           | CFAP70      | 707271    |
| Ciliary neurotrophic factor                        | CNTF        | 701907    |
| Ciliogenesis associated TTC17 interacting protein  | CATIP       | 698579    |
| Circadian associated repressor of transcription    | CIART       | 706693    |
| Citrate lyase beta like                            | CLYBL       | 699339    |
| CKLF-like MARVEL transmembrane domain containing 3 | CMTM3       | 695592    |
| CKLF-like MARVEL transmembrane domain containing 6 | CMTM6       | 704441    |
| CKLF-like MARVEL transmembrane domain containing 7 | CMTM7       | 704329    |
| CKLF-like MARVEL transmembrane domain containing 8 | CMTM8       | 704234    |
| Clathrin, light chain A                            | CLTA        | 693659    |
| Claudin 15                                         | CLDN15      | 719637    |
| Claudin 16                                         | CLDN16      | 704442    |
| Claudin 3                                          | CLDN3       | 716771    |
| Claudin 4                                          | CLDN4       | 716808    |



|                                                         |         |        |
|---------------------------------------------------------|---------|--------|
| Claudin domain containing 1                             | CLDND1  | 698472 |
| Cleavage and polyadenylation factor I subunit 1         | CLP1    | 705071 |
| Cleavage and polyadenylation specific factor 1          | CPSF1   | 702082 |
| Cleavage and polyadenylation specific factor 4          | CPSF4   | 708119 |
| Cleavage stimulation factor, 3' pre-RNA, subunit 2      | CSTF2   | 701235 |
| Cleavage stimulation factor, 3' pre-RNA, subunit 3      | CSTF3   | 694040 |
| Cleft lip and palate associated transmembrane protein 1 | CLPTM1  | 718306 |
| Clpb homolog, mitochondrial AAA ATPase chaperonin       | CLPB    | 718461 |
| CLPTM1-like                                             | CLPTM1L | 709968 |
| Clusterin associated protein 1                          | CLUAP1  | 703676 |
| Cms1 ribosomal small subunit homolog (yeast)            | CMSS1   | 699717 |
| Coa synthase                                            | COASY   | 710491 |
| Coagulation factor XII (Hageman factor)                 | F12     | 699875 |
| Coatomer protein complex subunit beta 1                 | COPB1   | 699327 |
| Coatomer protein complex subunit epsilon                | COPE    | 719631 |
| Coatomer protein complex subunit zeta 1                 | COPZ1   | 705176 |
| Coatomer protein complex subunit zeta 2                 | COPZ2   | 696299 |
| Codanin 1                                               | CDAN1   | 708838 |
| Coenzyme Q10A                                           | COQ10A  | 712341 |
| Coenzyme Q3 methyltransferase                           | COQ3    | 694215 |
| Cofilin 1 (non-muscle)                                  | CFL1    | 721882 |
| Cofilin 2 (muscle)                                      | CFL2    | 693875 |
| Coiled-coil domain containing 106                       | CCDC106 | 702611 |
| Coiled-coil domain containing 117                       | CCDC117 | 713804 |
| Coiled-coil domain containing 12                        | CCDC12  | 712061 |
| Coiled-coil domain containing 134                       | CCDC134 | 708713 |
| Coiled-coil domain containing 136                       | CCDC136 | 701874 |
| Coiled-coil domain containing 142                       | CCDC142 | 709014 |
| Coiled-coil domain containing 146                       | CCDC146 | 694907 |
| Coiled-coil domain containing 148                       | CCDC148 | 698322 |
| Coiled-coil domain containing 17                        | CCDC17  | 706591 |
| Coiled-coil domain containing 174                       | CCDC174 | 701654 |
| Coiled-coil domain containing 181                       | CCDC181 | 700803 |
| Coiled-coil domain containing 186                       | CCDC186 | 722518 |
| Coiled-coil domain containing 191                       | CCDC191 | 710219 |
| Coiled-coil domain containing 24                        | CCDC24  | 702564 |
| Coiled-coil domain containing 28A                       | CCDC28A | 703104 |
| Coiled-coil domain containing 36                        | CCDC36  | 707136 |
| Coiled-coil domain containing 42                        | CCDC42  | 717532 |
| Coiled-coil domain containing 43                        | CCDC43  | 715325 |
| Coiled-coil domain containing 59                        | CCDC59  | 698443 |
| Coiled-coil domain containing 82                        | CCDC82  | 700198 |
| Coiled-coil domain containing 85B                       | CCDC85B | 715413 |
| Coiled-coil domain containing 90B                       | CCDC90B | 702035 |
| Coiled-coil domain containing 92                        | CCDC92  | 705922 |
| Coiled-coil domain containing 96                        | CCDC96  | 722716 |
| Coiled-coil domain containing 97                        | CCDC97  | 706342 |
| Coiled-coil-helix-coiled-coil-helix domain containing 1 | CHCHD1  | 706322 |

|                                                          |         |           |
|----------------------------------------------------------|---------|-----------|
| Coiled-coil-helix-coiled-coil-helix domain containing 10 | CHCHD10 | 720205    |
| Coiled-coil-helix-coiled-coil-helix domain containing 2  | CHCHD2  | 702967    |
| Coiled-coil-helix-coiled-coil-helix domain containing 5  | CHCHD5  | 699323    |
| Coiled-coil-helix-coiled-coil-helix domain containing 6  | CHCHD6  | 716767    |
| Coilin                                                   | COIL    | 708103    |
| Cold inducible RNA binding protein                       | CIRBP   | 706175    |
| Cold shock domain containing E1, RNA binding             | CSDE1   | 708897    |
| Collagen triple helix repeat containing 1                | CTHRC1  | 694882    |
| Collagen, type I, alpha 2                                | COL1A2  | 700359    |
| Collagen, type III, alpha 1                              | COL3A1  | 574131    |
| Collagen, type IX, alpha 1                               | COL9A1  | 714809    |
| Collagen, type VI, alpha 1                               | COL6A1  | 721855    |
| Collagen, type XII, alpha 1                              | COL12A1 | 717820    |
| Collagen, type XXIV, alpha 1                             | COL24A1 | 711713    |
| Colony stimulating factor 1 (macrophage)                 | CSF1    | 702532    |
| Colony stimulating factor 3                              | CSF3    | 698961    |
| Colony stimulating factor 3 receptor                     | CSF3R   | 713485    |
| COMM domain containing 2                                 | COMMD2  | 711498    |
| COMM domain containing 6                                 | COMMD6  | 695191    |
| COMM domain containing 7                                 | COMMD7  | 711628    |
| COMM domain containing 8                                 | COMMD8  | 704346    |
| COMM domain containing 9                                 | COMMD9  | 716992    |
| Complement component 1, q subcomponent binding protein   | C1QBP   | 711817    |
| Complement component 1, q subcomponent, C chain          | C1QC    | 708589    |
| Complement component 1, s subcomponent                   | C1S     | 714589    |
| Complement factor properdin                              | CFP     | 707386    |
| Complexin 1                                              | CPLX1   | 703519    |
| Component of oligomeric golgi complex 1                  | COG1    | 695754    |
| Component of oligomeric golgi complex 2                  | COG2    | 714263    |
| Component of oligomeric golgi complex 3                  | COG3    | 702375    |
| Component of oligomeric golgi complex 4                  | COG4    | 712103    |
| Component of oligomeric golgi complex 6                  | COG6    | 697092    |
| Component of oligomeric golgi complex 7                  | COG7    | 700218    |
| Connector enhancer of kinase suppressor of Ras 1         | CNKSRI  | 714154    |
| Conserved helix-loop-helix ubiquitous kinase             | CHUK    | 709511    |
| Coordinator of PRMT5, differentiation stimulator         | COPRS   | 713293    |
| COP9 signalosome subunit 2                               | COPS2   | 714814    |
| COP9 signalosome subunit 3                               | COPS3   | 698461    |
| COP9 signalosome subunit 4                               | COPS4   | 693435    |
| COP9 signalosome subunit 5                               | COPS5   | 704584    |
| COP9 signalosome subunit 6                               | COPS6   | 710667    |
| Copine I                                                 | CPNE1   | 100329144 |
| Copine II                                                | CPNE2   | 703557    |
| Copine III                                               | CPNE3   | 694013    |
| Copine V                                                 | CPNE5   | 719255    |
| Copine VIII                                              | CPNE8   | 696586    |
| Copper chaperone for superoxide dismutase                | CCS     | 721802    |
| Coproporphyrinogen oxidase                               | CPOX    | 698849    |

|                                                                       |         |           |
|-----------------------------------------------------------------------|---------|-----------|
| Core-binding factor, beta subunit                                     | CBFB    | 695767    |
| Core-binding factor, runt domain, alpha subunit 2; translocated to, 3 | CBFA2T3 | 698233    |
| Corepressor interacting with RBPJ, 1                                  | CIR1    | 698068    |
| Cornichon family AMPA receptor auxiliary protein 1                    | CNIH1   | 695002    |
| Cornichon family AMPA receptor auxiliary protein 4                    | CNIH4   | 701767    |
| Coronin, actin binding protein, 1B                                    | CORO1B  | 721725    |
| Cortactin                                                             | CTTN    | 708291    |
| Cortactin binding protein 2                                           | CTTNBP2 | 705351    |
| COX19 cytochrome c oxidase assembly homolog (S. Cerevisiae)           | COX19   | 696368    |
| Craniofacial development protein 1                                    | CFDP1   | 711343    |
| Creatine kinase, brain                                                | CKB     | 711167    |
| CREB regulated transcription coactivator 2                            | CRTC2   | 715908    |
| Crumbs family member 3                                                | CRB3    | 700086    |
| Cryptochrome circadian clock 1                                        | CRY1    | 703752    |
| Crystallin lambda 1                                                   | CRYL1   | 703988    |
| CSE1 chromosome segregation 1-like (yeast)                            | CSE1L   | 704301    |
| C-src tyrosine kinase                                                 | CSK     | 702868    |
| CTD phosphatase subunit 1                                             | CTDP1   | 698467    |
| CTD small phosphatase 2                                               | CTDSP2  | 715956    |
| CTD small phosphatase like 2                                          | CTDSPL2 | 711917    |
| C-terminal binding protein 1                                          | CTBP1   | 694507    |
| C-terminal binding protein 2                                          | CTBP2   | 695124    |
| CTP synthase 1                                                        | CTPS1   | 695498    |
| CTP synthase 2                                                        | CTPS2   | 721014    |
| CTR9 homolog, Paf1/RNA polymerase II complex component                | CTR9    | 705748    |
| CTS telomere maintenance complex component 1                          | CTC1    | 717075    |
| C-type lectin domain family 1, member A                               | CLEC1A  | 717526    |
| CUE domain containing 2                                               | CUEDC2  | 713243    |
| CUGBP, Elav-like family member 1                                      | CELF1   | 713167    |
| Cullin 2                                                              | CUL2    | 698384    |
| Cullin 4A                                                             | CUL4A   | 714302    |
| Cullin 5                                                              | CUL5    | 707559    |
| Cullin 7                                                              | CUL7    | 699545    |
| Cullin-associated and neddylation-dissociated 1                       | CAND1   | 716184    |
| Cutc copper transporter                                               | CUTC    | 709050    |
| Cut-like homeobox 2                                                   | CUX2    | 107001016 |
| CWC15 spliceosome-associated protein                                  | CWC15   | 698332    |
| CWC22 homolog, spliceosome-associated protein                         | CWC22   | 704087    |
| CWF19-like 2, cell cycle control (S. Pombe)                           | CWF19L2 | 706825    |
| C-x(9)-C motif containing 1                                           | CMC1    | 705147    |
| C-x(9)-C motif containing 4                                           | CMC4    | 100423504 |
| CXXC finger protein 1                                                 | CXXC1   | 700341    |
| Cyclin A2                                                             | CCNA2   | 707259    |
| Cyclin B1                                                             | CCNB1   | 699504    |
| Cyclin B2                                                             | CCNB2   | 702184    |
| Cyclin D binding myb-like transcription factor 1                      | DMTF1   | 706292    |
| Cyclin D2                                                             | CCND2   | 710379    |
| Cyclin D3                                                             | CCND3   | 695215    |

|                                                           |          |           |
|-----------------------------------------------------------|----------|-----------|
| Cyclin E1                                                 | CCNE1    | 700589    |
| Cyclin G1                                                 | CCNG1    | 697738    |
| Cyclin H                                                  | CCNH     | 694224    |
| Cyclin I                                                  | CCNI     | 677687    |
| Cyclin O                                                  | CCNO     | 706193    |
| Cyclin Pas1/PHO80 domain containing 1                     | CNPPD1   | 704271    |
| Cyclin T2                                                 | CCNT2    | 708813    |
| Cyclin Y                                                  | CCNY     | 698889    |
| Cyclin-dependent kinase 1                                 | CDK1     | 699269    |
| Cyclin-dependent kinase 12                                | CDK12    | 696733    |
| Cyclin-dependent kinase 14                                | CDK14    | 703442    |
| Cyclin-dependent kinase 19                                | CDK19    | 698292    |
| Cyclin-dependent kinase 2                                 | CDK2     | 711002    |
| Cyclin-dependent kinase 2 associated protein 2            | CDK2AP2  | 711640    |
| Cyclin-dependent kinase 2 interacting protein             | CINP     | 709044    |
| Cyclin-dependent kinase 4                                 | CDK4     | 715650    |
| Cyclin-dependent kinase 5, regulatory subunit 1 (p35)     | CDK5R1   | 714274    |
| Cyclin-dependent kinase 8                                 | CDK8     | 709761    |
| Cyclin-dependent kinase 9                                 | CDK9     | 699840    |
| Cyclin-dependent kinase inhibitor 2C (p18, inhibits CDK4) | CDKN2C   | 711877    |
| Cyclin-dependent kinase inhibitor 2D (p19, inhibits CDK4) | CDKN2D   | 713172    |
| Cyclin-dependent kinase inhibitor 3                       | CDKN3    | 694877    |
| Cyclin-dependent kinase-like 2 (CDC2-related kinase)      | CDKL2    | 701467    |
| Cystatin B                                                | CSTB     | 713504    |
| Cystatin C                                                | CST3     | 574313    |
| Cysteine and glycine rich protein 1                       | CSRP1    | 709693    |
| Cysteine rich hydrophobic domain 2                        | CHIC2    | 697359    |
| Cysteine sulfinic acid decarboxylase                      | CSAD     | 701290    |
| Cysteine/histidine-rich 1                                 | CYHR1    | 702522    |
| Cysteine-rich transmembrane module containing 1           | CYSTM1   | 697656    |
| Cysteine-serine-rich nuclear protein 1                    | CSRNP1   | 694328    |
| Cysteine-serine-rich nuclear protein 2                    | CSRNP2   | 694549    |
| CysteinyI-trna synthetase                                 | CARS     | 706502    |
| CysteinyI-trna synthetase 2, mitochondrial (putative)     | CARS2    | 694840    |
| Cystinosin, lysosomal cystine transporter                 | CTNS     | 706721    |
| Cytidine deaminase                                        | CDA      | 705913    |
| Cytidine monophosphate (UMP-CMP) kinase 1, cytosolic      | CMPK1    | 710196    |
| Cytidine monophosphate N-acetylneuraminic acid synthetase | CMAS     | 706604    |
| Cytochrome b reductase 1                                  | CYBRD1   | 694818    |
| Cytochrome b-245 heavy chain                              | CYBB     | 696542    |
| Cytochrome b5 reductase 1                                 | CYB5R1   | 704519    |
| Cytochrome b5 reductase 4                                 | CYB5R4   | 695553    |
| Cytochrome b5 type B (outer mitochondrial membrane)       | CYB5B    | 705093    |
| Cytochrome b-561 domain containing 2                      | CYB561D2 | 702280    |
| Cytochrome c oxidase subunit 5A                           | COX5A    | 692061    |
| Cytochrome c oxidase subunit 6C                           | COX6C    | 100428416 |
| Cytochrome c oxidase subunit 7AH                          | COX7AH   | 692060    |
| Cytochrome c oxidase subunit III                          | COX3     | 2846633   |

|                                                                |         |           |
|----------------------------------------------------------------|---------|-----------|
| Cytochrome c oxidase subunit IV isoform 1                      | COX4I1  | 693811    |
| Cytochrome c oxidase subunit viia polypeptide 2 like           | COX7A2L | 712764    |
| Cytochrome c oxidase subunit viib                              | COX7B   | 706099    |
| Cytochrome c oxidase subunit viic                              | COX7C   | 100429280 |
| Cytochrome c oxidase subunit VIIIA (ubiquitous)                | COX8A   | 718007    |
| Cytochrome c-1                                                 | CYC1    | 700518    |
| Cytochrome P450, family 2, subfamily D, polypeptide 6          | CYP2D6  | 678691    |
| Cytochrome P450, family 4, subfamily F, polypeptide 8          | CYP4F8  | 718335    |
| Cytochrome P450c17                                             | CYP17A1 | 678693    |
| Cytokine induced apoptosis inhibitor 1                         | CIAPIN1 | 704770    |
| Cytokine inducible SH2-containing protein                      | CISH    | 701456    |
| Cytokine like 1                                                | CYTL1   | 711664    |
| Cytoplasmic FMR1 interacting protein 2                         | CYFIP2  | 714984    |
| Cytoplasmic polyadenylation element binding protein 2          | CPEB2   | 722844    |
| Cytoskeleton associated protein 2 like                         | CKAP2L  | 704381    |
| Cytoskeleton associated protein 5                              | CKAP5   | 714095    |
| Cytosolic thiouridylase subunit 1                              | CTU1    | 719536    |
| Dab, mitogen-responsive phosphoprotein, homolog 2 (Drosophila) | DAB2    | 694349    |
| Dachsous cadherin-related 1                                    | DCHS1   | 711938    |
| DALR anticodon binding domain containing 3                     | DALRD3  | 708403    |
| Damage-specific DNA binding protein 2                          | DDB2    | 713813    |
| D-amino-acid oxidase                                           | DAO     | 706373    |
| DAZ associated protein 1                                       | DAZAP1  | 707132    |
| DAZ associated protein 2                                       | DAZAP2  | 695282    |
| DAZ interacting zinc finger protein 1-like                     | DZIP1L  | 716551    |
| Dcmp deaminase                                                 | DCTD    | 700995    |
| DCN1, defective in cullin neddylation 1, domain containing 1   | DCUN1D1 | 708357    |
| DCN1, defective in cullin neddylation 1, domain containing 4   | DCUN1D4 | 702908    |
| DCN1, defective in cullin neddylation 1, domain containing 5   | DCUN1D5 | 704099    |
| Dctp pyrophosphatase 1                                         | DCTPP1  | 710500    |
| DDB1 and CUL4 associated factor 10                             | DCAF10  | 716256    |
| DDB1 and CUL4 associated factor 11                             | DCAF11  | 714867    |
| DDB1 and CUL4 associated factor 12                             | DCAF12  | 702148    |
| DDB1 and CUL4 associated factor 4                              | DCAF4   | 695337    |
| DDB1 and CUL4 associated factor 6                              | DCAF6   | 698686    |
| D-dopachrome tautomerase                                       | DDT     | 699933    |
| DDRGK domain containing 1                                      | DDRGK1  | 717226    |
| DEAD (Asp-Glu-Ala-Asp) box helicase 24                         | DDX24   | 700253    |
| DEAD (Asp-Glu-Ala-Asp) box helicase 3, Y-linked                | DDX3Y   | 100270696 |
| DEAD (Asp-Glu-Ala-Asp) box helicase 42                         | DDX42   | 717964    |
| DEAD (Asp-Glu-Ala-Asp) box helicase 56                         | DDX56   | 698980    |
| DEAD (Asp-Glu-Ala-Asp) box polypeptide 19B                     | DDX19B  | 709576    |
| DEAD (Asp-Glu-Ala-Asp) box polypeptide 27                      | DDX27   | 703852    |
| DEAD (Asp-Glu-Ala-Asp) box polypeptide 39A                     | DDX39A  | 718822    |
| DEAD (Asp-Glu-Ala-Asp) box polypeptide 41                      | DDX41   | 700742    |
| DEAD (Asp-Glu-Ala-Asp) box polypeptide 47                      | DDX47   | 697304    |
| DEAD (Asp-Glu-Ala-Asp) box polypeptide 50                      | DDX50   | 712511    |
| DEAD (Asp-Glu-Ala-Asp) box polypeptide 54                      | DDX54   | 712763    |

|                                                             |         |        |
|-------------------------------------------------------------|---------|--------|
| DEAD/H (Asp-Glu-Ala-Asp/His) box helicase 11                | DDX11   | 717040 |
| DEAD/H (Asp-Glu-Ala-Asp/His) box polypeptide 26B            | DDX26B  | 709688 |
| Deafness, autosomal dominant 5                              | DFNA5   | 703441 |
| Deafness, autosomal recessive 31                            | DFNB31  | 708051 |
| DEAH (Asp-Glu-Ala-Asp/His) box polypeptide 57               | DHX57   | 713523 |
| DEAH (Asp-Glu-Ala-His) box helicase 30                      | DHX30   | 711178 |
| DEAH (Asp-Glu-Ala-His) box helicase 9                       | DHX9    | 715453 |
| DEAH (Asp-Glu-Ala-His) box polypeptide 29                   | DHX29   | 706306 |
| DEAH (Asp-Glu-Ala-His) box polypeptide 32                   | DHX32   | 695919 |
| DEAH (Asp-Glu-Ala-His) box polypeptide 35                   | DHX35   | 697673 |
| DEAH (Asp-Glu-Ala-His) box polypeptide 36                   | DHX36   | 708112 |
| DEAH (Asp-Glu-Ala-His) box polypeptide 38                   | DHX38   | 709173 |
| DEAH (Asp-Glu-Ala-His) box polypeptide 40                   | DHX40   | 715202 |
| Death associated protein 3                                  | DAP3    | 719314 |
| Death effector domain containing                            | DEDD    | 719875 |
| Death inducer-obliterators 1                                | DIDO1   | 698313 |
| Death-associated protein                                    | DAP     | 697362 |
| Debranching RNA lariats 1                                   | DBR1    | 716467 |
| Decapping exoribonuclease                                   | DXO     | 716027 |
| Decapping mrna 1B                                           | DCP1B   | 708089 |
| Decorin                                                     | DCN     | 709933 |
| Dedicator of cytokinesis 5                                  | DOCK5   | 711359 |
| De-etiolated homolog 1 (Arabidopsis)                        | DET1    | 697994 |
| Defender against cell death 1                               | DAD1    | 711840 |
| Defensin beta 118                                           | DEFB118 | 641438 |
| Dehydrodolichyl diphosphate synthase subunit                | DHDDS   | 714635 |
| Dehydrogenase/reductase (SDR family) member 1               | DHRS1   | 715933 |
| Dehydrogenase/reductase (SDR family) member 11              | DHRS11  | 713823 |
| Dehydrogenase/reductase (SDR family) member 3               | DHRS3   | 715548 |
| Dehydrogenase/reductase (SDR family) member 7               | DHRS7   | 702872 |
| Deiodinase, iodothyronine, type II                          | DIO2    | 707484 |
| DEK proto-oncogene                                          | DEK     | 712460 |
| Deleted in lung and esophageal cancer 1                     | DLEC1   | 697163 |
| Deleted in primary ciliary dyskinesia homolog (mouse)       | DPCD    | 712082 |
| Delta(4)-desaturase, sphingolipid 1                         | DEGS1   | 702128 |
| Delta(4)-desaturase, sphingolipid 2                         | DEGS2   | 717222 |
| Delta-like 1 homolog (Drosophila)                           | DLK1    | 707595 |
| Delta-like 2 homolog (Drosophila)                           | DLK2    | 700106 |
| Deltex 3, E3 ubiquitin ligase                               | DTX3    | 715175 |
| DENN/MADD domain containing 2D                              | DENND2D | 702568 |
| DENN/MADD domain containing 4A                              | DENND4A | 709675 |
| DENN/MADD domain containing 5A                              | DENND5A | 707945 |
| DENN/MADD domain containing 6A                              | DENND6A | 707616 |
| Denticless E3 ubiquitin protein ligase homolog (Drosophila) | DTL     | 711236 |
| Deoxyguanosine kinase                                       | DGUOK   | 707554 |
| Deoxyhypusine synthase                                      | DHPS    | 716213 |
| Deoxythymidylate kinase                                     | DTYMK   | 701781 |
| DEP domain containing 1B                                    | DEPDC1B | 709670 |

|                                                                                  |         |           |
|----------------------------------------------------------------------------------|---------|-----------|
| Dephospho-coa kinase domain containing                                           | DCAKD   | 715841    |
| Derlin 1                                                                         | DERL1   | 703803    |
| Derlin 2                                                                         | DERL2   | 712051    |
| Dermatan sulfate epimerase                                                       | DSE     | 716054    |
| Desmoplakin                                                                      | DSP     | 694860    |
| Destrin (actin depolymerizing factor)                                            | DSTN    | 695969    |
| Desumoylating isopeptidase 2                                                     | DESI2   | 713515    |
| Developmentally regulated GTP binding protein 1                                  | DRG1    | 716791    |
| Dexi homolog (mouse)                                                             | DEXI    | 100430904 |
| Diacylglycerol kinase alpha                                                      | DGKA    | 710559    |
| Diacylglycerol kinase, delta 130kda                                              | DGKD    | 714210    |
| Diacylglycerol O-acyltransferase 1                                               | DGAT1   | 701489    |
| Diaphanous related formin 2                                                      | DIAPH2  | 699140    |
| Dicarbonyl/L-xylulose reductase                                                  | DCXR    | 715513    |
| Dickkopf WNT signaling pathway inhibitor 1                                       | DKK1    | 702997    |
| Digeorge syndrome critical region gene 6                                         | DGCR6   | 693512    |
| Dihydrolipoamide S-acetyltransferase                                             | DLAT    | 710930    |
| Dihydrolipoamide S-succinyltransferase (E2 component of 2-oxo-glutarate complex) | DLST    | 701006    |
| Dihydropyrimidinase like 3                                                       | DPYSL3  | 708425    |
| Dihydropyrimidine dehydrogenase                                                  | DPYD    | 715672    |
| Dihydrouridine synthase 1-like                                                   | DUS1L   | 715662    |
| Dihydrouridine synthase 2                                                        | DUS2    | 702051    |
| Dihydrouridine synthase 3-like                                                   | DUS3L   | 719524    |
| Dimethylarginine dimethylaminohydrolase 1                                        | DDAH1   | 711395    |
| Dipeptidase 2                                                                    | DPEP2   | 701570    |
| Dipeptidyl-peptidase 3                                                           | DPP3    | 721809    |
| Dipeptidyl-peptidase 8                                                           | DPP8    | 709428    |
| Diphthamide biosynthesis 1                                                       | DPH1    | 721275    |
| Diphthamide biosynthesis 3                                                       | DPH3    | 695309    |
| Diphthamide biosynthesis 5                                                       | DPH5    | 712253    |
| DIS3 like exosome 3'-5' exoribonuclease                                          | DIS3L   | 710238    |
| Discoidin domain receptor tyrosine kinase 1                                      | DDR1    | 714233    |
| Discoidin domain receptor tyrosine kinase 2                                      | DDR2    | 720124    |
| Discs, large (Drosophila) homolog-associated protein 4                           | DLGAP4  | 702928    |
| Discs, large homolog 1 (Drosophila)                                              | DLG1    | 709572    |
| Discs, large homolog 4 (Drosophila)                                              | DLG4    | 714273    |
| Discs, large homolog 5 (Drosophila)                                              | DLG5    | 703123    |
| Dishevelled associated activator of morphogenesis 1                              | DAAM1   | 701706    |
| Dishevelled segment polarity protein 1                                           | DVL1    | 705864    |
| Dishevelled segment polarity protein 2                                           | DVL2    | 714381    |
| Dishevelled-binding antagonist of beta-catenin 1                                 | DACT1   | 701218    |
| Dispatched homolog 1 (Drosophila)                                                | DISP1   | 703960    |
| Distal-less homeobox 5                                                           | DLX5    | 697853    |
| DNA (cytosine-5-)-methyltransferase 1                                            | DNMT1   | 574321    |
| DNA cross-link repair 1A                                                         | DCLRE1A | 697882    |
| DNA damage inducible transcript 4                                                | DDIT4   | 715307    |
| DNA methyltransferase 1 associated protein 1                                     | DMAP1   | 702919    |

|                                                                                                                |         |        |
|----------------------------------------------------------------------------------------------------------------|---------|--------|
| Dnaj heat shock protein family (Hsp40) member A1                                                               | DNAJA1  | 703765 |
| Dnaj heat shock protein family (Hsp40) member B1                                                               | DNAJB1  | 718890 |
| Dnaj heat shock protein family (Hsp40) member B2                                                               | DNAJB2  | 702936 |
| Dnaj heat shock protein family (Hsp40) member B4                                                               | DNAJB4  | 707206 |
| Dnaj heat shock protein family (Hsp40) member B6                                                               | DNAJB6  | 693305 |
| Dnaj heat shock protein family (Hsp40) member C1                                                               | DNAJC1  | 704151 |
| Dnaj heat shock protein family (Hsp40) member C13                                                              | DNAJC13 | 717741 |
| Dnaj heat shock protein family (Hsp40) member C15                                                              | DNAJC15 | 700339 |
| Dnaj heat shock protein family (Hsp40) member C17                                                              | DNAJC17 | 704013 |
| Dnaj heat shock protein family (Hsp40) member C27                                                              | DNAJC27 | 694037 |
| Dnaj heat shock protein family (Hsp40) member C3                                                               | DNAJC3  | 695757 |
| Dnaj heat shock protein family (Hsp40) member C30                                                              | DNAJC30 | 716630 |
| Dnaj heat shock protein family (Hsp40) member C6                                                               | DNAJC6  | 698682 |
| Dnaj heat shock protein family (Hsp40) member C8                                                               | DNAJC8  | 720231 |
| Dnaj heat shock protein family (Hsp40) member C9                                                               | DNAJC9  | 707599 |
| Docking protein 5                                                                                              | DOK5    | 698689 |
| Dolichyl-phosphate (UDP-N-acetylglucosamine) N-acetylglucosamine phosphotransferase 1 (glcnac-1-P transferase) | DPAGT1  | 703538 |
| Dolichyl-phosphate mannosyltransferase polypeptide 2, regulatory subunit                                       | DPM2    | 698709 |
| Dolichyl-phosphate mannosyltransferase polypeptide 3                                                           | DPM3    | 717446 |
| Dopey family member 1                                                                                          | DOPEY1  | 694339 |
| Double C2-like domains, alpha                                                                                  | DOC2A   | 707895 |
| Double zinc ribbon and ankyrin repeat domains 1                                                                | DZANK1  | 700143 |
| Down-regulator of transcription 1                                                                              | DR1     | 707632 |
| Dpy-30, histone methyltransferase complex regulatory subunit                                                   | DPY30   | 706155 |
| DR1-associated protein 1 (negative cofactor 2 alpha)                                                           | DRAP1   | 715271 |
| Drebrin 1                                                                                                      | DBN1    | 700375 |
| Drosha, ribonuclease type III                                                                                  | DROSHA  | 692081 |
| DTW domain containing 1                                                                                        | DTWD1   | 715084 |
| D-tyrosyl-trna deacylase 1                                                                                     | DTD1    | 700895 |
| Dual serine/threonine and tyrosine protein kinase                                                              | DSTYK   | 664732 |
| Dual specificity phosphatase 1                                                                                 | DUSP1   | 702981 |
| Dual specificity phosphatase 10                                                                                | DUSP10  | 705056 |
| Dual specificity phosphatase 11                                                                                | DUSP11  | 707123 |
| Dual specificity phosphatase 12                                                                                | DUSP12  | 720034 |
| Dual specificity phosphatase 14                                                                                | DUSP14  | 714383 |
| Dual specificity phosphatase 22                                                                                | DUSP22  | 705824 |
| Dual specificity phosphatase 23                                                                                | DUSP23  | 719474 |
| Dual specificity tyrosine-(Y)-phosphorylation regulated kinase 1B                                              | DYRK1B  | 698848 |
| Dual specificity tyrosine-(Y)-phosphorylation regulated kinase 2                                               | DYRK2   | 717941 |
| Dual specificity tyrosine-(Y)-phosphorylation regulated kinase 3                                               | DYRK3   | 695163 |
| Dynactin subunit 1                                                                                             | DCTN1   | 708290 |
| Dynactin subunit 2                                                                                             | DCTN2   | 714948 |
| Dynactin subunit 4                                                                                             | DCTN4   | 712783 |
| Dynactin subunit 6                                                                                             | DCTN6   | 694273 |
| Dynamin 1-like                                                                                                 | DNM1L   | 695388 |
| Dynamin 2                                                                                                      | DNM2    | 713558 |



|                                                               |         |           |
|---------------------------------------------------------------|---------|-----------|
| Dynein regulatory complex subunit 3                           | DRC3    | 699590    |
| Dynein, axonemal, assembly factor 2                           | DNAAF2  | 719026    |
| Dynein, axonemal, heavy chain 7                               | DNAH7   | 695393    |
| Dynein, axonemal, intermediate chain 1                        | DNAI1   | 701307    |
| Dynein, axonemal, light chain 4                               | DNAL4   | 702019    |
| Dynein, cytoplasmic 1, intermediate chain 1                   | DYNC1I1 | 574351    |
| Dynein, light chain, LC8-type 1                               | DYNLL1  | 702360    |
| Dynein, light chain, LC8-type 2                               | DYNLL2  | 100423736 |
| Dynein, light chain, roadblock-type 2                         | DYNLRB2 | 713503    |
| Dyskeratosis congenita 1, dyskerin                            | DKC1    | 702563    |
| Dystrobrevin beta                                             | DTNB    | 696167    |
| Dystrophia myotonica protein kinase                           | DMPK    | 715328    |
| E1A binding protein p300                                      | EP300   | 706258    |
| E2F transcription factor 1                                    | E2F1    | 714126    |
| E2F transcription factor 2                                    | E2F2    | 710200    |
| E2F transcription factor 3                                    | E2F3    | 713904    |
| E2F transcription factor 4, p107/p130-binding                 | E2F4    | 696864    |
| E2F transcription factor 5, p130-binding                      | E2F5    | 703352    |
| E2F transcription factor 6                                    | E2F6    | 697311    |
| E2F transcription factor 7                                    | E2F7    | 694423    |
| E2F-associated phosphoprotein                                 | EAPP    | 714727    |
| E4F transcription factor 1                                    | E4F1    | 695882    |
| E74-like factor 2 (ets domain transcription factor)           | ELF2    | 696760    |
| Ecdysoless homolog (Drosophila)                               | ECD     | 707699    |
| Echinoderm microtubule associated protein like 5              | EML5    | 694095    |
| Ecotropic viral integration site 5-like                       | EVI5L   | 706628    |
| ECSIT signalling integrator                                   | ECSIT   | 714805    |
| Ectodermal-neural cortex 1 (with BTB domain)                  | ENC1    | 704577    |
| Ectodysplasin A receptor                                      | EDAR    | 695059    |
| Ecto-NOX disulfide-thiol exchanger 1                          | ENOX1   | 700475    |
| Ectonucleoside triphosphate diphosphohydrolase 4              | ENTPD4  | 717197    |
| Ectonucleoside triphosphate diphosphohydrolase 5              | ENTPD5  | 698503    |
| Ectonucleoside triphosphate diphosphohydrolase 7              | ENTPD7  | 708844    |
| Ectonucleotide pyrophosphatase/phosphodiesterase 4 (putative) | ENPP4   | 703680    |
| Ectonucleotide pyrophosphatase/phosphodiesterase 6            | ENPP6   | 693950    |
| EF-hand calcium binding domain 11                             | EFCAB11 | 695233    |
| EF-hand calcium binding domain 12                             | EFCAB12 | 703176    |
| EF-hand calcium binding domain 6                              | EFCAB6  | 712043    |
| EF-hand domain (C-terminal) containing 1                      | EFHC1   | 708517    |
| EF-hand domain family member D2                               | EFHD2   | 694155    |
| EGF-like, fibronectin type III and laminin G domains          | EGFLAM  | 693314    |
| EGF-like-domain, multiple 6                                   | EGFL6   | 711280    |
| EGF-like-domain, multiple 7                                   | EGFL7   | 709840    |
| EGF-like-domain, multiple 8                                   | EGFL8   | 717145    |
| Egl-9 family hypoxia-inducible factor 1                       | EGLN1   | 713410    |
| Egl-9 family hypoxia-inducible factor 2                       | EGLN2   | 703083    |
| EH domain binding protein 1                                   | EHBP1   | 693902    |
| Elastin microfibril interfacer 1                              | EMILIN1 | 698204    |

|                                                                 |        |        |
|-----------------------------------------------------------------|--------|--------|
| ELAV like neuron-specific RNA binding protein 2                 | ELAVL2 | 708195 |
| Electron-transfer-flavoprotein, beta polypeptide                | ETFB   | 719606 |
| Electron-transferring-flavoprotein dehydrogenase                | ETFDH  | 701207 |
| ELK1, member of ETS oncogene family                             | ELK1   | 712610 |
| ELL associated factor 2                                         | EAF2   | 714223 |
| ELMO/CED-12 domain containing 3                                 | ELMOD3 | 695180 |
| Elongation factor RNA polymerase II-like 3                      | ELL3   | 711271 |
| Elongation factor Tu GTP binding domain containing 2            | EFTUD2 | 715512 |
| ELOVL fatty acid elongase 1                                     | ELOVL1 | 700557 |
| ELOVL fatty acid elongase 4                                     | ELOVL4 | 692070 |
| Embryonal Fyn-associated substrate                              | EFS    | 713838 |
| Embryonic ectoderm development                                  | EED    | 703866 |
| Emerin                                                          | EMD    | 699400 |
| EMG1 N1-specific pseudouridine methyltransferase                | EMG1   | 722122 |
| Emopamil binding protein (sterol isomerase)                     | EBP    | 714315 |
| Empty spiracles homeobox 1                                      | EMX1   | 705441 |
| Empty spiracles homeobox 2                                      | EMX2   | 701370 |
| Enah/Vasp-like                                                  | EVL    | 706316 |
| Endonuclease domain containing 1                                | ENDOD1 | 699210 |
| Endonuclease G                                                  | ENDOG  | 717171 |
| Endonuclease/exonuclease/phosphatase family domain containing 1 | EEPD1  | 706642 |
| Endoplasmic reticulum lectin 1                                  | ERLEC1 | 716460 |
| Endoplasmic reticulum protein 27                                | ERP27  | 700186 |
| Endosulfine alpha                                               | ENSA   | 715857 |
| Endothelial differentiation-related factor 1                    | EDF1   | 708611 |
| Endothelin 1                                                    | EDN1   | 699982 |
| Endothelin 3                                                    | EDN3   | 693385 |
| Energy homeostasis associated                                   | ENHO   | 701072 |
| Engulfment and cell motility 1                                  | ELMO1  | 705818 |
| Engulfment and cell motility 2                                  | ELMO2  | 707316 |
| Engulfment and cell motility 3                                  | ELMO3  | 698664 |
| Enhancer of mrna decapping 3                                    | EDC3   | 709182 |
| Enhancer of polycomb homolog 2 (Drosophila)                     | EPC2   | 721916 |
| Enhancer of rudimentary homolog (Drosophila)                    | ERH    | 712507 |
| Enhancer of yellow 2 homolog (Drosophila)                       | ENY2   | 699048 |
| Enhancer of zeste 1 polycomb repressive complex 2 subunit       | EZH1   | 711173 |
| Enhancer of zeste 2 polycomb repressive complex 2 subunit       | EZH2   | 709075 |
| Enkurin domain containing 1                                     | ENKD1  | 699487 |
| Enolase 1, (alpha)                                              | ENO1   | 709378 |
| Enolase 2 (gamma, neuronal)                                     | ENO2   | 714208 |
| Enolase superfamily member 1                                    | ENOSF1 | 697333 |
| Enoyl-coa delta isomerase 1                                     | ECI1   | 696243 |
| Enoyl-coa delta isomerase 2                                     | ECI2   | 709579 |
| Enoyl-coa hydratase domain containing 3                         | ECHDC3 | 693583 |
| Enoyl-coa hydratase, short chain, 1, mitochondrial              | ECHS1  | 722723 |
| Envoplakin                                                      | EVPL   | 705079 |
| EP300 interacting inhibitor of differentiation 3                | EID3   | 701175 |
| Ephrin-A3                                                       | EFNA3  | 717373 |

|                                                                   |         |        |
|-------------------------------------------------------------------|---------|--------|
| Ephrin-B1                                                         | EFNB1   | 694149 |
| Epidermal growth factor receptor pathway substrate 15-like 1      | EPS15L1 | 719502 |
| Epidermal growth factor receptor pathway substrate 8              | EPS8    | 702777 |
| Epididymal protein 3A                                             | EDDM3A  | 704355 |
| Epilepsy, progressive myoclonus type 2A, Lafora disease (laforin) | EPM2A   | 699361 |
| Epithelial cell transforming 2                                    | ECT2    | 694056 |
| Epithelial membrane protein 2                                     | EMP2    | 710315 |
| Epithelial membrane protein 3                                     | EMP3    | 717867 |
| EPS8 like 1                                                       | EPS8L1  | 698281 |
| Epsin 1                                                           | EPN1    | 702956 |
| ER lipid raft associated 1                                        | ERLIN1  | 709596 |
| ER membrane protein complex subunit 2                             | EMC2    | 697878 |
| ER membrane protein complex subunit 4                             | EMC4    | 695907 |
| ER membrane protein complex subunit 6                             | EMC6    | 707030 |
| ER membrane protein complex subunit 8                             | EMC8    | 693674 |
| ER membrane protein complex subunit 9                             | EMC9    | 715192 |
| ERBB receptor feedback inhibitor 1                                | ERRFI1  | 722072 |
| ERGIC and golgi 3                                                 | ERGIC3  | 704736 |
| Erythrocyte membrane protein band 4.1-like 1                      | EPB41L1 | 710697 |
| ES cell expressed Ras                                             | ERAS    | 711442 |
| Esterase D                                                        | ESD     | 708871 |
| Estrogen receptor binding site associated, antigen, 9             | EBAG9   | 699305 |
| Ethanolamine kinase 2                                             | ETNK2   | 700683 |
| Ethylmalonic encephalopathy 1                                     | ETHE1   | 718089 |
| Ethylmalonyl-coa decarboxylase 1                                  | ECHDC1  | 712072 |
| Etoposide induced 2.4                                             | EI24    | 713226 |
| Eukaryotic elongation factor, selenocysteine-trna-specific        | EEFSEC  | 705784 |
| Eukaryotic translation elongation factor 1 beta 2                 | EEF1B2  | 707019 |
| Eukaryotic translation elongation factor 1 epsilon 1              | EEF1E1  | 695426 |
| Eukaryotic translation elongation factor 1 gamma                  | EEF1G   | 722274 |
| Eukaryotic translation initiation factor 1                        | EIF1    | 704606 |
| Eukaryotic translation initiation factor 2 subunit alpha          | EIF2S1  | 710150 |
| Eukaryotic translation initiation factor 2 subunit beta           | EIF2S2  | 708593 |
| Eukaryotic translation initiation factor 2A, 65kda                | EIF2A   | 710497 |
| Eukaryotic translation initiation factor 2-alpha kinase 3         | EIF2AK3 | 699575 |
| Eukaryotic translation initiation factor 2B subunit beta          | EIF2B2  | 701360 |
| Eukaryotic translation initiation factor 2B subunit epsilon       | EIF2B5  | 703673 |
| Eukaryotic translation initiation factor 2B subunit gamma         | EIF2B3  | 705862 |
| Eukaryotic translation initiation factor 3 subunit B              | EIF3B   | 698481 |
| Eukaryotic translation initiation factor 3 subunit D              | EIF3D   | 695051 |
| Eukaryotic translation initiation factor 3 subunit F              | EIF3F   | 706269 |
| Eukaryotic translation initiation factor 3 subunit G              | EIF3G   | 714726 |
| Eukaryotic translation initiation factor 3 subunit H              | EIF3H   | 700517 |
| Eukaryotic translation initiation factor 3 subunit I              | EIF3I   | 708145 |
| Eukaryotic translation initiation factor 3 subunit K              | EIF3K   | 693536 |
| Eukaryotic translation initiation factor 3 subunit L              | EIF3L   | 699189 |
| Eukaryotic translation initiation factor 3 subunit M              | EIF3M   | 695698 |
| Eukaryotic translation initiation factor 4 gamma, 2               | EIF4G2  | 705510 |

|                                                                     |           |           |
|---------------------------------------------------------------------|-----------|-----------|
| Eukaryotic translation initiation factor 4E binding protein 1       | EIF4EBP1  | 703628    |
| Eukaryotic translation initiation factor 4E binding protein 2       | EIF4EBP2  | 100424760 |
| Eukaryotic translation initiation factor 4E binding protein 3       | EIF4EBP3  | 100532736 |
| Eukaryotic translation initiation factor 4E family member 2         | EIF4E2    | 713487    |
| Eukaryotic translation initiation factor 4E nuclear import factor 1 | EIF4ENIF1 | 716871    |
| Eukaryotic translation initiation factor 4H                         | EIF4H     | 693429    |
| Eukaryotic translation initiation factor 5B                         | EIF5B     | 714129    |
| Eukaryotic translation termination factor 1                         | ETF1      | 714449    |
| Eva-1 homolog A (C. Elegans)                                        | EVA1A     | 710843    |
| Eva-1 homolog B (C. Elegans)                                        | EVA1B     | 713159    |
| EWS RNA binding protein 1                                           | EWSR1     | 714432    |
| Excision repair cross-complementation group 2                       | ERCC2     | 715485    |
| Excision repair cross-complementation group 3                       | ERCC3     | 698829    |
| Exocyst complex component 1                                         | EXOC1     | 695664    |
| Exocyst complex component 2                                         | EXOC2     | 706296    |
| Exocyst complex component 3                                         | EXOC3     | 708422    |
| Exocyst complex component 4                                         | EXOC4     | 712458    |
| Exonuclease 1                                                       | EXO1      | 706902    |
| Exosome component 10                                                | EXOSC10   | 714153    |
| Exosome component 3                                                 | EXOSC3    | 716347    |
| Exosome component 4                                                 | EXOSC4    | 700012    |
| Exosome component 5                                                 | EXOSC5    | 705203    |
| Exosome component 8                                                 | EXOSC8    | 695071    |
| Exostosin glycosyltransferase 1                                     | EXT1      | 701488    |
| Exostosin glycosyltransferase 2                                     | EXT2      | 715975    |
| Exostosin-like glycosyltransferase 2                                | EXTL2     | 712189    |
| Exportin 1                                                          | XPO1      | 718063    |
| Exportin 4                                                          | XPO4      | 703548    |
| Exportin 5                                                          | XPO5      | 700664    |
| Exportin 6                                                          | XPO6      | 704332    |
| Exportin, trna                                                      | XPOT      | 717375    |
| Extended synaptotagmin-like protein 1                               | ESYT1     | 711720    |
| Extra spindle pole bodies like 1, separase                          | ESPL1     | 702136    |
| Extracellular matrix protein 1                                      | ECM1      | 707209    |
| F11 receptor                                                        | F11R      | 719824    |
| FAD-dependent oxidoreductase domain containing 1                    | FOXRED1   | 714271    |
| Failed axon connections homolog                                     | FAXC      | 693945    |
| Family with sequence similarity 103 member A1                       | FAM103A1  | 714660    |
| Family with sequence similarity 104 member A                        | FAM104A   | 695865    |
| Family with sequence similarity 107 member B                        | FAM107B   | 696896    |
| Family with sequence similarity 110 member A                        | FAM110A   | 717055    |
| Family with sequence similarity 110 member B                        | FAM110B   | 703840    |
| Family with sequence similarity 117 member A                        | FAM117A   | 700079    |
| Family with sequence similarity 127, member A                       | FAM127A   | 708766    |
| Family with sequence similarity 129 member B                        | FAM129B   | 707403    |
| Family with sequence similarity 13 member B                         | FAM13B    | 713567    |
| Family with sequence similarity 134 member A                        | FAM134A   | 704378    |
| Family with sequence similarity 136 member A                        | FAM136A   | 702718    |

|                                                                            |          |           |
|----------------------------------------------------------------------------|----------|-----------|
| Family with sequence similarity 151 member B                               | FAM151B  | 715256    |
| Family with sequence similarity 156 member B                               | FAM156B  | 698392    |
| Family with sequence similarity 160 member A2                              | FAM160A2 | 711641    |
| Family with sequence similarity 170 member A                               | FAM170A  | 701046    |
| Family with sequence similarity 171 member B                               | FAM171B  | 712442    |
| Family with sequence similarity 175 member B                               | FAM175B  | 694886    |
| Family with sequence similarity 178 member B                               | FAM178B  | 710890    |
| Family with sequence similarity 179 member B                               | FAM179B  | 702188    |
| Family with sequence similarity 181 member B                               | FAM181B  | 701184    |
| Family with sequence similarity 185 member A                               | FAM185A  | 694971    |
| Family with sequence similarity 186 member B                               | FAM186B  | 711001    |
| Family with sequence similarity 188 member A                               | FAM188A  | 699009    |
| Family with sequence similarity 189 member A2                              | FAM189A2 | 701247    |
| Family with sequence similarity 19 (chemokine (C-C motif)-like), member A5 | FAM19A5  | 107000696 |
| Family with sequence similarity 195 member A                               | FAM195A  | 696621    |
| Family with sequence similarity 199, X-linked                              | FAM199X  | 699523    |
| Family with sequence similarity 20 member C                                | FAM20C   | 695088    |
| Family with sequence similarity 206 member A                               | FAM206A  | 710486    |
| Family with sequence similarity 210 member A                               | FAM210A  | 701669    |
| Family with sequence similarity 212 member A                               | FAM212A  | 704983    |
| Family with sequence similarity 214 member B                               | FAM214B  | 698214    |
| Family with sequence similarity 219 member A                               | FAM219A  | 700651    |
| Family with sequence similarity 220 member A                               | FAM220A  | 703785    |
| Family with sequence similarity 222 member B                               | FAM222B  | 710302    |
| Family with sequence similarity 3 member A                                 | FAM3A    | 701159    |
| Family with sequence similarity 35 member A                                | FAM35A   | 694102    |
| Family with sequence similarity 43 member A                                | FAM43A   | 708207    |
| Family with sequence similarity 45 member A                                | FAM45A   | 713269    |
| Family with sequence similarity 49 member B                                | FAM49B   | 695449    |
| Family with sequence similarity 58 member A                                | FAM58A   | 695925    |
| Family with sequence similarity 63 member B                                | FAM63B   | 703159    |
| Family with sequence similarity 64 member A                                | FAM64A   | 712701    |
| Family with sequence similarity 73 member B                                | FAM73B   | 722577    |
| Family with sequence similarity 8 member A1                                | FAM8A1   | 703789    |
| Family with sequence similarity 89 member B                                | FAM89B   | 721925    |
| Family with sequence similarity 91 member A1                               | FAM91A1  | 705119    |
| Family with sequence similarity 92 member A1                               | FAM92A1  | 698794    |
| Fanconi anemia complementation group B                                     | FANCB    | 712083    |
| Fanconi anemia complementation group E                                     | FANCE    | 718889    |
| Fanconi anemia complementation group G                                     | FANCG    | 698837    |
| Fanconi anemia complementation group I                                     | FANCI    | 699878    |
| Fanconi anemia core complex associated protein 100                         | FAAP100  | 713876    |
| Far upstream element (FUSE) binding protein 1                              | FUBP1    | 707102    |
| Far upstream element (FUSE) binding protein 3                              | FUBP3    | 722470    |
| Farnesyl-diphosphate farnesyltransferase 1                                 | FDFT1    | 696396    |
| Farnesyltransferase, CAAX box, beta                                        | FNTB     | 708129    |
| Fas (TNFRSF6) associated factor 1                                          | FAF1     | 714405    |

|                                                        |          |        |
|--------------------------------------------------------|----------|--------|
| Fas associated via death domain                        | FADD     | 708606 |
| Fas-activated serine/threonine kinase                  | FASTK    | 714020 |
| Fasciculation and elongation protein zeta 1            | FEZ1     | 713106 |
| Fasciculation and elongation protein zeta 2 (zygin II) | FEZ2     | 708288 |
| Fat storage-inducing transmembrane protein 1           | FITM1    | 715085 |
| Fatty acid desaturase 2                                | FADS2    | 719037 |
| Fatty acid desaturase 3                                | FADS3    | 722337 |
| Fatty acyl coa reductase 1                             | FAR1     | 699947 |
| F-box and WD repeat domain containing 4                | FBXW4    | 711996 |
| F-box and WD repeat domain containing 5                | FBXW5    | 721653 |
| F-box and WD repeat domain containing 7                | FBXW7    | 695101 |
| F-box and WD repeat domain containing 9                | FBXW9    | 716383 |
| F-box protein 11                                       | FBXO11   | 715651 |
| F-box protein 15                                       | FBXO15   | 694446 |
| F-box protein 21                                       | FBXO21   | 693647 |
| F-box protein 3                                        | FBXO3    | 693281 |
| F-box protein 30                                       | FBXO30   | 699241 |
| F-box protein 32                                       | FBXO32   | 704804 |
| F-box protein 33                                       | FBXO33   | 699629 |
| F-box protein 34                                       | FBXO34   | 697537 |
| F-box protein 38                                       | FBXO38   | 709869 |
| F-box protein 4                                        | FBXO4    | 697007 |
| F-box protein 5                                        | FBXO5    | 703219 |
| F-box protein 6                                        | FBXO6    | 722740 |
| F-box protein 7                                        | FBXO7    | 717317 |
| F-box protein 8                                        | FBXO8    | 699302 |
| F-box protein 9                                        | FBXO9    | 712024 |
| Fc fragment of igg, receptor, transporter, alpha       | FCGRT    | 718859 |
| Fc receptor-like B                                     | FCRLB    | 720028 |
| FCH and double SH3 domains 2                           | FCHSD2   | 717996 |
| Fem-1 homolog b (C. Elegans)                           | FEM1B    | 693955 |
| Fer (fps/fes related) tyrosine kinase                  | FER      | 711220 |
| FERM domain containing 3                               | FRMD3    | 713394 |
| FERM domain containing 6                               | FRMD6    | 707266 |
| Ferritin mitochondrial                                 | FTMT     | 699743 |
| FGFR1 oncogene partner                                 | FGFR1OP  | 706749 |
| FGFR1 oncogene partner 2                               | FGFR1OP2 | 708905 |
| Fibrillarin                                            | FBL      | 700286 |
| Fibroblast activation protein alpha                    | FAP      | 701541 |
| Fibroblast growth factor 13                            | FGF13    | 695460 |
| Fibroblast growth factor receptor substrate 3          | FRS3     | 694462 |
| Fibronectin 1                                          | FN1      | 613269 |
| Fibronectin type III and ankyrin repeat domains 1      | FANK1    | 696281 |
| Fibronectin type III domain containing 4               | FNDC4    | 702098 |
| FIG4 phosphoinositide 5-phosphatase                    | FIG4     | 699914 |
| Filamin A interacting protein 1                        | FILIP1   | 716439 |
| Filamin B, beta                                        | FLNB     | 702732 |
| Filamin binding LIM protein 1                          | FBLIM1   | 695727 |

|                                                                             |         |        |
|-----------------------------------------------------------------------------|---------|--------|
| Finkel-Biskis-Reilly murine sarcoma virus (FBR-musv) ubiquitously expressed | FAU     | 716761 |
| Fission, mitochondrial 1                                                    | FIS1    | 714444 |
| FK506 binding protein 11                                                    | FKBP11  | 708598 |
| FK506 binding protein 1B                                                    | FKBP1B  | 703973 |
| FK506 binding protein 4                                                     | FKBP4   | 708481 |
| FK506 binding protein 6                                                     | FKBP6   | 716306 |
| FK506 binding protein 8                                                     | FKBP8   | 720232 |
| FK506 binding protein 9                                                     | FKBP9   | 708827 |
| Flavin adenine dinucleotide synthetase 1                                    | FLAD1   | 717133 |
| Flightless I actin binding protein                                          | FLII    | 700471 |
| Flotillin 2                                                                 | FLOT2   | 716527 |
| FLYWCH-type zinc finger 1                                                   | FLYWCH1 | 700909 |
| Fms-related tyrosine kinase 3 ligand                                        | FLT3LG  | 719239 |
| Folate receptor 1 (adult)                                                   | FOLR1   | 718388 |
| Follicular dendritic cell secreted protein                                  | FDCSP   | 707784 |
| Follistatin like 1                                                          | FSTL1   | 713367 |
| Forkhead box A3                                                             | FOXA3   | 715663 |
| Forkhead box O3                                                             | FOXO3   | 700731 |
| Formin binding protein 1-like                                               | FNBP1L  | 713578 |
| Formin homology 2 domain containing 1                                       | FHOD1   | 697346 |
| Forty-two-three domain containing 1                                         | FYTTD1  | 714705 |
| Four and a half LIM domains 1                                               | FHL1    | 710692 |
| Four and a half LIM domains 2                                               | FHL2    | 713222 |
| Fragile X mental retardation, autosomal homolog 1                           | FXR1    | 710170 |
| FRAS1 related extracellular matrix 1                                        | FREM1   | 713874 |
| Frataxin                                                                    | FXN     | 699469 |
| Frizzled class receptor 10                                                  | FZD10   | 717812 |
| Frizzled class receptor 5                                                   | FZD5    | 710796 |
| Frizzled class receptor 6                                                   | FZD6    | 694625 |
| Fructosamine 3 kinase related protein                                       | FN3KRP  | 716431 |
| Ftsj homolog 3 (E. Coli)                                                    | FTSJ3   | 718009 |
| Ftsj RNA methyltransferase homolog 1 (E. Coli)                              | FTSJ1   | 710243 |
| Fucokinase                                                                  | FUK     | 709226 |
| Fucosyltransferase 10 (alpha (1,3) fucosyltransferase)                      | FUT10   | 697659 |
| Fumarylacetoacetate hydrolase (fumarylacetoacetase)                         | FAH     | 712716 |
| FUN14 domain containing 1                                                   | FUNDC1  | 709370 |
| Fuzzy planar cell polarity protein                                          | FUZ     | 719442 |
| FXYP domain containing ion transport regulator 7                            | FXYP7   | 718457 |
| FYN proto-oncogene, Src family tyrosine kinase                              | FYN     | 574214 |
| G elongation factor, mitochondrial 1                                        | GFM1    | 706456 |
| G elongation factor, mitochondrial 2                                        | GFM2    | 704247 |
| G kinase anchoring protein 1                                                | GKAP1   | 708816 |
| G protein pathway suppressor 1                                              | GPS1    | 719343 |
| G protein pathway suppressor 2                                              | GPS2    | 721816 |
| G protein regulated inducer of neurite outgrowth 2                          | GPRIN2  | 694369 |
| G protein-coupled bile acid receptor 1                                      | GPBAR1  | 697937 |
| G protein-coupled receptor 12                                               | GPR12   | 710030 |

|                                                                     |           |           |
|---------------------------------------------------------------------|-----------|-----------|
| G protein-coupled receptor 135                                      | GPR135    | 701843    |
| G protein-coupled receptor 137                                      | GPR137    | 717722    |
| G protein-coupled receptor 143                                      | GPR143    | 709148    |
| G protein-coupled receptor 161                                      | GPR161    | 698934    |
| G protein-coupled receptor 162                                      | GPR162    | 100428264 |
| G protein-coupled receptor 173                                      | GPR173    | 698645    |
| G protein-coupled receptor 19                                       | GPR19     | 697072    |
| G protein-coupled receptor 3                                        | GPR3      | 716033    |
| G protein-coupled receptor 31                                       | GPR31     | 717158    |
| G protein-coupled receptor 87                                       | GPR87     | 709766    |
| G protein-coupled receptor 89A                                      | GPR89A    | 696579    |
| G protein-coupled receptor kinase 6                                 | GRK6      | 700000    |
| G protein-coupled receptor kinase interacting arfgap 2              | GIT2      | 708092    |
| G2/M-phase specific E3 ubiquitin protein ligase                     | G2E3      | 717021    |
| GA binding protein transcription factor, beta subunit 1             | GABPB1    | 715334    |
| GABA(A) receptor-associated protein                                 | GABARAP   | 714597    |
| GABA(A) receptor-associated protein like 2                          | GABARAPL2 | 714413    |
| Galactosidase alpha                                                 | GLA       | 703129    |
| Galactosylceramidase                                                | GALC      | 693322    |
| Galanin receptor 3                                                  | GALR3     | 701727    |
| Galanin/GMAP prepropeptide                                          | GAL       | 721572    |
| Gametogenetin binding protein 2                                     | GGNBP2    | 713750    |
| Gamma-aminobutyric acid (GABA) B receptor, 1                        | GABBR1    | 708987    |
| Gamma-glutamyl hydrolase (conjugase, folylpolyglutamylyl hydrolase) | GGH       | 700747    |
| Gamma-glutamylcyclotransferase                                      | GGCT      | 695547    |
| Ganglioside induced differentiation associated protein 1            | GDAP1     | 697136    |
| Ganglioside induced differentiation associated protein 2            | GDAP2     | 705994    |
| Gap junction protein alpha 1                                        | GJA1      | 714344    |
| Gap junction protein alpha 4                                        | GJA4      | 710913    |
| Gap junction protein alpha 9                                        | GJA9      | 715648    |
| Gap junction protein beta 2                                         | GJB2      | 704224    |
| Gap junction protein beta 4                                         | GJB4      | 710994    |
| Gap junction protein gamma 1                                        | GJC1      | 715463    |
| Gasdermin A                                                         | GSDMA     | 698841    |
| GATA binding protein 2                                              | GATA2     | 705551    |
| GCN1, eif2 alpha kinase activator homolog                           | GCN1      | 698528    |
| GC-rich promoter binding protein 1                                  | GPBP1     | 708322    |
| GC-rich promoter binding protein 1-like 1                           | GPBP1L1   | 706690    |
| GDP dissociation inhibitor 2                                        | GDI2      | 712510    |
| GDP-mannose 4,6-dehydratase                                         | GMDS      | 707051    |
| GDP-mannose pyrophosphorylase A                                     | GMPPA     | 703756    |
| GDP-mannose pyrophosphorylase B                                     | GMPPB     | 705454    |
| Gelsolin                                                            | GSN       | 699705    |
| Gem nuclear organelle associated protein 4                          | GEMIN4    | 699841    |
| Gem nuclear organelle associated protein 5                          | GEMIN5    | 714864    |
| Gem nuclear organelle associated protein 6                          | GEMIN6    | 711246    |
| Geminin, DNA replication inhibitor                                  | GMNN      | 708416    |



|                                                                                               |        |        |
|-----------------------------------------------------------------------------------------------|--------|--------|
| General transcription factor IIA 2                                                            | GTF2A2 | 702984 |
| General transcription factor IIB                                                              | GTF2B  | 694770 |
| General transcription factor IIE subunit 2                                                    | GTF2E2 | 694622 |
| General transcription factor IIF subunit 2                                                    | GTF2F2 | 701668 |
| General transcription factor IIH subunit 4                                                    | GTF2H4 | 714285 |
| General transcription factor IIH subunit 5                                                    | GTF2H5 | 700107 |
| General transcription factor iii                                                              | GTF2I  | 574269 |
| General transcription factor IIIA                                                             | GTF3A  | 710492 |
| General transcription factor IIIC subunit 1                                                   | GTF3C1 | 703998 |
| General transcription factor IIIC subunit 3                                                   | GTF3C3 | 696338 |
| General transcription factor IIIC subunit 4                                                   | GTF3C4 | 714849 |
| General transcription factor IIIC subunit 5                                                   | GTF3C5 | 714489 |
| General transcription factor IIIC subunit 6                                                   | GTF3C6 | 696512 |
| Gephyrin                                                                                      | GPHN   | 709677 |
| Germ cell-less, spermatogenesis associated 1                                                  | GMCL1  | 701545 |
| GID complex subunit 4 homolog                                                                 | GID4   | 699842 |
| GID complex subunit 8                                                                         | GID8   | 698189 |
| GIN5 complex subunit 2 (Psf2 homolog)                                                         | GIN5   | 693426 |
| GLE1, RNA export mediator                                                                     | GLE1   | 717474 |
| GLI family zinc finger 1                                                                      | GLI1   | 714843 |
| GLI pathogenesis-related 2                                                                    | GLIPR2 | 693734 |
| Glucokinase (hexokinase 4)                                                                    | GCK    | 699728 |
| Glucosamine-6-phosphate deaminase 1                                                           | GNPDA1 | 703036 |
| Glucosamine-6-phosphate deaminase 2                                                           | GNPDA2 | 710175 |
| Glucose 6 phosphatase, catalytic, 3                                                           | G6PC3  | 714276 |
| Glucose-6-phosphate dehydrogenase                                                             | G6PD   | 701137 |
| Glucose-fructose oxidoreductase domain containing 1                                           | GFOD1  | 700607 |
| Glucose-fructose oxidoreductase domain containing 2                                           | GFOD2  | 699723 |
| Glucosidase, beta (bile acid) 2                                                               | GBA2   | 696062 |
| Glutamate receptor, ionotropic, N-methyl D-aspartate-associated protein 1 (glutamate binding) | GRINA  | 708234 |
| Glutamate rich 5                                                                              | ERICH5 | 703244 |
| Glutamate-ammonia ligase                                                                      | GLUL   | 715952 |
| Glutamate-cysteine ligase, modifier subunit                                                   | GCLM   | 713888 |
| Glutamic-oxaloacetic transaminase 2                                                           | GOT2   | 707896 |
| Glutamic-pyruvate transaminase (alanine aminotransferase)                                     | GPT    | 703122 |
| Glutaminase                                                                                   | GLS    | 693520 |
| Glutamine and serine rich 1                                                                   | QSER1  | 694563 |
| Glutamine-fructose-6-phosphate transaminase 2                                                 | GFPT2  | 715826 |
| Glutaminyl-trna synthetase                                                                    | QARS   | 708111 |
| Glutaredoxin                                                                                  | GLRX   | 698997 |
| Glutaredoxin 2                                                                                | GLRX2  | 712396 |
| Glutaredoxin 5                                                                                | GLRX5  | 702989 |
| Glutaryl-coa dehydrogenase                                                                    | GCDH   | 716935 |
| Glutathione peroxidase 1                                                                      | GPX1   | 706732 |
| Glutathione peroxidase 4                                                                      | GPX4   | 705333 |
| Glutathione peroxidase 7                                                                      | GPX7   | 715474 |
| Glutathione peroxidase 8 (putative)                                                           | GPX8   | 705965 |

|                                                                       |         |           |
|-----------------------------------------------------------------------|---------|-----------|
| Glutathione S-transferase alpha 2                                     | GSTA2   | 709037    |
| Glutathione S-transferase alpha 4                                     | GSTA4   | 709666    |
| Glutathione S-transferase kappa 1                                     | GSTK1   | 704240    |
| Glutathione S-transferase mu 2 (muscle)                               | GSTM2   | 700053    |
| Glutathione S-transferase omega 1                                     | GSTO1   | 716078    |
| Glutathione S-transferase omega 2                                     | GSTO2   | 715291    |
| Glutathione S-transferase pi 1                                        | GSTP1   | 721704    |
| Glutathione S-transferase theta 2                                     | GSTT2   | 700185    |
| Glutathione S-transferase zeta 1                                      | GSTZ1   | 705723    |
| Glyceraldehyde-3-phosphate dehydrogenase                              | GAPDH   | 574353    |
| Glycerol kinase 2                                                     | GK2     | 696635    |
| Glycerol-3-phosphate acyltransferase 4                                | GPAT4   | 710363    |
| Glyceronephosphate O-acyltransferase                                  | GNPAT   | 713603    |
| Glycerophosphodiester phosphodiesterase domain containing 5           | GDPD5   | 695518    |
| Glycine C-acetyltransferase                                           | GCAT    | 698811    |
| Glycine receptor beta                                                 | GLRB    | 700368    |
| Glycophorin C (Gerbich blood group)                                   | GYPC    | 712092    |
| Glycoprotein 2 (zymogen granule membrane)                             | GP2     | 695766    |
| Glycoprotein integral membrane 1                                      | GINM1   | 696511    |
| Glycoprotein M6B                                                      | GPM6B   | 711762    |
| Glycosylphosphatidylinositol anchor attachment 1                      | GPAA1   | 699887    |
| Glycosyltransferase 8 domain containing 1                             | GLT8D1  | 695999    |
| Glycosyltransferase 8 domain containing 2                             | GLT8D2  | 699937    |
| Glycosyltransferase like domain containing 1                          | GTDC1   | 100424584 |
| Glyoxalase I                                                          | GLO1    | 719518    |
| Golgi apparatus membrane protein TVP23 homolog B                      | TVP23B  | 677707    |
| Golgi phosphoprotein 3-like                                           | GOLPH3L | 707858    |
| Golgi reassembly stacking protein 2                                   | GORASP2 | 694170    |
| Golgi SNAP receptor complex member 2                                  | GOSR2   | 716841    |
| Golgi-associated, gamma adaptin ear containing, ARF binding protein 1 | GGA1    | 697929    |
| Golgi-associated, gamma adaptin ear containing, ARF binding protein 3 | GGA3    | 705751    |
| Golgin A4                                                             | GOLGA4  | 697455    |
| Golgin A7                                                             | GOLGA7  | 709911    |
| Golgin B1                                                             | GOLGB1  | 713993    |
| Golgin, RAB6-interacting                                              | GORAB   | 702571    |
| Gonadotropin releasing hormone 1                                      | GNRH1   | 613033    |
| G-patch domain containing 3                                           | GPATCH3 | 715116    |
| Grancalcin                                                            | GCA     | 702138    |
| Granulysin                                                            | GNLY    | 696059    |
| GRB2-related adaptor protein                                          | GRAP    | 702473    |
| Gremlin 2, DAN family BMP antagonist                                  | GREM2   | 708280    |
| GRIP and coiled-coil domain containing 1                              | GCC1    | 697975    |
| Growth arrest and DNA damage inducible beta                           | GADD45B | 711257    |
| Growth arrest and DNA damage inducible gamma                          | GADD45G | 697835    |
| Growth arrest specific 2                                              | GAS2    | 700952    |
| Growth arrest specific 2 like 1                                       | GAS2L1  | 714530    |
| Growth arrest specific 6                                              | GAS6    | 716066    |
| Growth arrest specific 8                                              | GAS8    | 701458    |

|                                                                             |          |           |
|-----------------------------------------------------------------------------|----------|-----------|
| Growth associated protein 43                                                | GAP43    | 711260    |
| Growth differentiation factor 15                                            | GDF15    | 719466    |
| Growth differentiation factor 7                                             | GDF7     | 702462    |
| Growth factor receptor bound protein 10                                     | GRB10    | 694786    |
| GRP1 (general receptor for phosphoinositides 1)-associated scaffold protein | GRASP    | 696547    |
| Grpe-like 1, mitochondrial (E. Coli)                                        | GRPEL1   | 709772    |
| Gse1 coiled-coil protein                                                    | GSE1     | 693298    |
| GTF2I repeat domain containing 1                                            | GTF2IRD1 | 693935    |
| GTP binding protein 2                                                       | GTPBP2   | 700913    |
| GTP binding protein 4                                                       | GTPBP4   | 709873    |
| GTP cyclohydrolase I feedback regulator                                     | GCHFR    | 708886    |
| Gtpase activating protein (SH3 domain) binding protein 1                    | G3BP1    | 713884    |
| Guanidinoacetate N-methyltransferase                                        | GAMT     | 721263    |
| Guanine nucleotide binding protein (G protein), alpha 11 (Gq class)         | GNA11    | 721649    |
| Guanine nucleotide binding protein (G protein), alpha 14                    | GNA14    | 705448    |
| Guanine nucleotide binding protein (G protein), beta polypeptide 1          | GNB1     | 703399    |
| Guanine nucleotide binding protein (G protein), beta polypeptide 2-like 1   | GNB2L1   | 708526    |
| Guanine nucleotide binding protein (G protein), beta polypeptide 3          | GNB3     | 713913    |
| Guanine nucleotide binding protein (G protein), gamma 10                    | GNG10    | 708193    |
| Guanine nucleotide binding protein (G protein), gamma 11                    | GNG11    | 700606    |
| Guanine nucleotide binding protein (G protein), gamma 2                     | GNG2     | 710000    |
| Guanine nucleotide binding protein (G protein), gamma 3                     | GNG3     | 100169968 |
| Guanine nucleotide binding protein (G protein), gamma 5                     | GNG5     | 710548    |
| Guanine nucleotide binding protein-like 3 (nucleolar)                       | GNL3     | 695877    |
| Guanosine monophosphate reductase 2                                         | GMPR2    | 715719    |
| Guanylate cyclase 1, soluble, alpha 2                                       | GUCY1A2  | 706615    |
| Guanylate cyclase activator 1A                                              | GUCA1A   | 695552    |
| Guanylate kinase 1                                                          | GUK1     | 695272    |
| H1 histone family, member X                                                 | H1FX     | 703414    |
| H2A histone family, member J                                                | H2AFJ    | 701863    |
| H2A histone family, member X                                                | H2AFX    | 703073    |
| H2A histone family, member Y                                                | H2AFY    | 711836    |
| H2A histone family, member Y2                                               | H2AFY2   | 711117    |
| H2A histone family, member Z                                                | H2AFZ    | 709326    |
| Haloacid dehalogenase like hydrolase domain containing 2                    | HDHD2    | 697216    |
| Haloacid dehalogenase like hydrolase domain containing 3                    | HDHD3    | 705447    |
| Harvey rat sarcoma viral oncogene homolog                                   | HRAS     | 698830    |
| HAUS augmin like complex subunit 4                                          | HAUS4    | 717252    |
| HAUS augmin like complex subunit 8                                          | HAUS8    | 718874    |
| HCLS1 associated protein X-1                                                | HAX1     | 716495    |
| HCLS1 binding protein 3                                                     | HS1BP3   | 702364    |
| Hdc homolog, cell cycle regulator                                           | HECA     | 702628    |
| HEAT repeat containing 6                                                    | HEATR6   | 720089    |
| Heat shock factor binding protein 1                                         | HSBP1    | 714498    |
| Heat shock protein 90kda alpha (cytosolic), class A member 1                | HSP90AA1 | 708431    |
| Heat shock protein 90kda alpha family class B member 1                      | HSP90AB1 | 702293    |

|                                                                |           |           |
|----------------------------------------------------------------|-----------|-----------|
| Heat shock protein 90kda beta family member 1                  | HSP90B1   | 699568    |
| Heat shock protein family A (Hsp70) member 13                  | HSPA13    | 694660    |
| Heat shock protein family A (Hsp70) member 8                   | HSPA8     | 707989    |
| Heat shock protein family B (small) member 11                  | HSPB11    | 714791    |
| Heat shock protein family B (small) member 6                   | HSPB6     | 710760    |
| Heat shock protein family B (small) member 8                   | HSPB8     | 574341    |
| Heat shock protein family D (Hsp60) member 1                   | HSPD1     | 698024    |
| Heat shock protein family H (Hsp110) member 1                  | HSPH1     | 721956    |
| Heat shock transcription factor 2                              | HSF2      | 713938    |
| HECT and RLD domain containing E3 ubiquitin protein ligase 3   | HERC3     | 703108    |
| HECT domain containing E3 ubiquitin protein ligase 1           | HECTD1    | 717177    |
| HECT domain containing E3 ubiquitin protein ligase 2           | HECTD2    | 697258    |
| HECT domain containing E3 ubiquitin protein ligase 3           | HECTD3    | 705051    |
| Helicase (DNA) B                                               | HELB      | 717860    |
| Helicase, lymphoid-specific                                    | HELLS     | 701598    |
| Hematological and neurological expressed 1                     | HN1       | 664729    |
| Hematological and neurological expressed 1-like                | HN1L      | 702283    |
| Hematopoietic prostaglandin D synthase                         | HPGDS     | 705227    |
| Heme binding protein 1                                         | HEBP1     | 697821    |
| Heme binding protein 2                                         | HEBP2     | 709176    |
| Heme oxygenase 2                                               | HMOX2     | 705461    |
| Hemogen                                                        | HEMGN     | 715562    |
| Hemoglobin subunit epsilon 1                                   | HBE1      | 715414    |
| Hemoglobin subunit theta 1                                     | HBQ1      | 100429488 |
| Hemoglobin, beta                                               | HBB       | 715559    |
| Hemoglobin, gamma G                                            | HBG2      | 715368    |
| HEN1 methyltransferase homolog 1 (Arabidopsis)                 | HENMT1    | 698896    |
| Heparin-binding EGF-like growth factor                         | HBEGF     | 695559    |
| Hepatocyte growth factor (hepatopietin A; scatter factor)      | HGF       | 708316    |
| Hepatocyte growth factor-regulated tyrosine kinase substrate   | HGS       | 714385    |
| Hepcidin antimicrobial peptide                                 | HAMP      | 708397    |
| Hermansky-Pudlak syndrome 6                                    | HPS6      | 712574    |
| Hes-related family bhlh transcription factor with YRPW motif 2 | HEY2      | 712988    |
| Heterogeneous nuclear ribonucleoprotein A/B                    | HNRNPAB   | 702509    |
| Heterogeneous nuclear ribonucleoprotein A1                     | HNRNPA1   | 702977    |
| Heterogeneous nuclear ribonucleoprotein A2/B1                  | HNRNPA2B1 | 701821    |
| Heterogeneous nuclear ribonucleoprotein C (C1/C2)              | HNRNPC    | 706423    |
| Heterogeneous nuclear ribonucleoprotein D                      | HNRNPD    | 694867    |
| Heterogeneous nuclear ribonucleoprotein D like                 | HNRNPDL   | 694603    |
| Heterogeneous nuclear ribonucleoprotein F                      | HNRNPF    | 717668    |
| Heterogeneous nuclear ribonucleoprotein H2 (H')                | HNRNPH2   | 703254    |
| Heterogeneous nuclear ribonucleoprotein K                      | HNRNPK    | 709112    |
| Heterogeneous nuclear ribonucleoprotein L                      | HNRNPL    | 694448    |
| Heterogeneous nuclear ribonucleoprotein L-like                 | HNRNPLL   | 710841    |
| Heterogeneous nuclear ribonucleoprotein R                      | HNRNPR    | 718721    |
| Hexamethylene bis-acetamide inducible 1                        | HEXIM1    | 716006    |
| Hexamethylene bis-acetamide inducible 2                        | HEXIM2    | 716047    |
| Hexokinase 1                                                   | HK1       | 711922    |

|                                                                                                   |           |        |
|---------------------------------------------------------------------------------------------------|-----------|--------|
| HIG1 hypoxia inducible domain family member 1B                                                    | HIGD1B    | 715566 |
| HIG1 hypoxia inducible domain family member 2A                                                    | HIGD2A    | 696888 |
| High mobility group 20A                                                                           | HMG20A    | 714893 |
| High mobility group box 1                                                                         | HMGB1     | 712849 |
| High mobility group nucleosomal binding domain 4                                                  | HMGN4     | 698039 |
| Highly divergent homeobox                                                                         | HDX       | 710427 |
| HIRA interacting protein 3                                                                        | HIRIP3    | 708004 |
| Histidine triad nucleotide binding protein 1                                                      | HINT1     | 706083 |
| Histidine triad nucleotide binding protein 2                                                      | HINT2     | 695521 |
| Histidyl-trna synthetase 2                                                                        | HARS2     | 697009 |
| Histocompatibility (minor) 13                                                                     | HM13      | 713216 |
| Histone acetyltransferase 1                                                                       | HAT1      | 695933 |
| Histone cluster 1, h2aj                                                                           | HIST1H2AJ | 704127 |
| Histone cluster 2, h3d                                                                            | HIST2H3D  | 696204 |
| Histone deacetylase 3                                                                             | HDAC3     | 704467 |
| Histone deacetylase 5                                                                             | HDAC5     | 711456 |
| Histone deacetylase 6                                                                             | HDAC6     | 711363 |
| Histone H4 transcription factor                                                                   | HINFP     | 703763 |
| HIV-1 Tat specific factor 1                                                                       | HTATSF1   | 693589 |
| HNF1 homeobox B                                                                                   | HNF1B     | 714540 |
| Holliday junction recognition protein                                                             | HJURP     | 718180 |
| Homeobox A9                                                                                       | HOXA9     | 699729 |
| Homeobox D10                                                                                      | HOXD10    | 700318 |
| Homeodomain interacting protein kinase 1                                                          | HIPK1     | 707856 |
| Homer scaffolding protein 3                                                                       | HOMER3    | 719647 |
| Homocysteine-inducible, endoplasmic reticulum stress-inducible,<br>ubiquitin-like domain member 1 | HERPUD1   | 703210 |
| Host cell factor C2                                                                               | HCFC2     | 700316 |
| HRAS like suppressor family member 5                                                              | HRASLS5   | 718317 |
| Hscb mitochondrial iron-sulfur cluster co-chaperone                                               | HSCB      | 713734 |
| Htra serine peptidase 1                                                                           | HTRA1     | 705855 |
| HUS1 checkpoint clamp component                                                                   | HUS1      | 699541 |
| Hyaluronan and proteoglycan link protein 3                                                        | HAPLN3    | 698880 |
| Hyaluronan binding protein 4                                                                      | HABP4     | 710213 |
| Hyaluronan synthase 3                                                                             | HAS3      | 704121 |
| Hyaluronoglucosaminidase 2                                                                        | HYAL2     | 702484 |
| Hydrogen voltage gated channel 1                                                                  | HVCN1     | 709745 |
| Hydroxyacyl-coa dehydrogenase                                                                     | HADH      | 696181 |
| Hydroxymethylbilane synthase                                                                      | HMBS      | 702943 |
| Hydroxyprostaglandin dehydrogenase 15-(NAD)                                                       | HPGD      | 697864 |
| Hydroxypyruvate isomerase (putative)                                                              | HYI       | 700926 |
| Hydroxysteroid (17-beta) dehydrogenase 10                                                         | HSD17B10  | 700018 |
| Hydroxysteroid (17-beta) dehydrogenase 4                                                          | HSD17B4   | 698369 |
| Hydroxysteroid (17-beta) dehydrogenase 6                                                          | HSD17B6   | 713549 |
| Hydroxysteroid dehydrogenase like 1                                                               | HSDL1     | 714962 |
| Hydroxysteroid dehydrogenase like 2                                                               | HSDL2     | 707233 |
| Hyperpolarization activated cyclic nucleotide gated potassium<br>channel 3                        | HCN3      | 717719 |

|                                                                             |        |           |
|-----------------------------------------------------------------------------|--------|-----------|
| Hypocretin (orexin) neuropeptide precursor                                  | HCRT   | 709564    |
| Hypoxia inducible lipid droplet-associated                                  | HILPDA | 701261    |
| Hypoxia up-regulated 1                                                      | HYOU1  | 707715    |
| Iduronidase, alpha-L-                                                       | IDUA   | 106998224 |
| Iga-inducing protein                                                        | IGIP   | 100423856 |
| IGF like family receptor 1                                                  | IGFLR1 | 710396    |
| IK cytokine, down-regulator of HLA II                                       | IK     | 696887    |
| ILK associated serine/threonine phosphatase                                 | ILKAP  | 706334    |
| Ilvb (bacterial acetolactate synthase)-like                                 | ILVBL  | 718086    |
| Immunoglobulin superfamily member 10                                        | IGSF10 | 709661    |
| Immunoglobulin superfamily member 9                                         | IGSF9  | 719535    |
| Immunoglobulin superfamily, DCC subclass, member 3                          | IGDCC3 | 709239    |
| IMP (inosine 5'-monophosphate) dehydrogenase 1                              | IMPDH1 | 701039    |
| IMP (inosine 5'-monophosphate) dehydrogenase 2                              | IMPDH2 | 708307    |
| IMP3, U3 small nucleolar ribonucleoprotein                                  | IMP3   | 706202    |
| IMP4 homolog, U3 small nucleolar ribonucleoprotein                          | IMP4   | 702144    |
| Importin 5                                                                  | IPO5   | 697448    |
| Importin 9                                                                  | IPO9   | 707210    |
| Increased sodium tolerance 1 homolog (yeast)                                | IST1   | 707245    |
| Indoleamine 2,3-dioxygenase 1                                               | IDO1   | 574370    |
| Inhibin alpha                                                               | INHA   | 574379    |
| Inhibitor of DNA binding 1, dominant negative helix-loop-helix protein      | ID1    | 713160    |
| Inhibitor of growth family member 1                                         | ING1   | 694955    |
| Inhibitor of growth family member 2                                         | ING2   | 701839    |
| Inhibitor of growth family member 4                                         | ING4   | 722073    |
| Inhibitor of kappa light polypeptide gene enhancer in B-cells, kinase beta  | IKBKB  | 704683    |
| Inhibitor of kappa light polypeptide gene enhancer in B-cells, kinase gamma | IKBKG  | 701237    |
| Inner centromere protein                                                    | INCENP | 722320    |
| INO80 complex subunit C                                                     | INO80C | 708819    |
| Inosine triphosphatase                                                      | ITPA   | 717257    |
| Inositol hexakisphosphate kinase 1                                          | IP6K1  | 705576    |
| Inositol monophosphatase domain containing 1                                | IMPAD1 | 696893    |
| Inositol polyphosphate phosphatase like 1                                   | INPPL1 | 718421    |
| Inositol polyphosphate-1-phosphatase                                        | INPP1  | 703301    |
| Inositol polyphosphate-5-phosphatase K                                      | INPP5K | 721222    |
| Inositol(myo)-1(or 4)-monophosphatase 2                                     | IMPA2  | 704320    |
| Inositol-tetrakisphosphate 1-kinase                                         | ITPK1  | 698756    |
| Inositol-trisphosphate 3-kinase A                                           | ITPKA  | 710541    |
| Insulin like 3                                                              | INSL3  | 100533192 |
| Insulin like growth factor binding protein 3                                | IGFBP3 | 696868    |
| Insulin like growth factor binding protein 5                                | IGFBP5 | 696339    |
| Insulin like growth factor binding protein 7                                | IGFBP7 | 693564    |
| Insulin-degrading enzyme                                                    | IDE    | 698640    |
| Integral membrane protein 2C                                                | ITM2C  | 711245    |
| Integrator complex subunit 10                                               | INTS10 | 705240    |
| Integrator complex subunit 12                                               | INTS12 | 694344    |

|                                                       |         |           |
|-------------------------------------------------------|---------|-----------|
| Integrator complex subunit 2                          | INTS2   | 712351    |
| Integrator complex subunit 4                          | INTS4   | 699466    |
| Integrator complex subunit 5                          | INTS5   | 719124    |
| Integrator complex subunit 7                          | INTS7   | 711152    |
| Integrator complex subunit 8                          | INTS8   | 700255    |
| Integrin alpha FG-GAP repeat containing 1             | ITFG1   | 716435    |
| Integrin linked kinase                                | ILK     | 709944    |
| Integrin subunit alpha 10                             | ITGA10  | 100428480 |
| Integrin subunit alpha V                              | ITGAV   | 707756    |
| Interactor of little elongation complex ELL subunit 1 | ICE1    | 710176    |
| Intercellular adhesion molecule 2                     | ICAM2   | 574158    |
| Interferon gamma receptor 1                           | IFNGR1  | 100423880 |
| Interferon regulatory factor 1                        | IRF1    | 707788    |
| Interferon regulatory factor 2                        | IRF2    | 694347    |
| Interferon regulatory factor 2 binding protein 1      | IRF2BP1 | 715611    |
| Interferon regulatory factor 2 binding protein-like   | IRF2BPL | 704474    |
| Interferon regulatory factor 3                        | IRF3    | 718970    |
| Interferon regulatory factor 9                        | IRF9    | 715335    |
| Interferon stimulated exonuclease gene 20kda like 2   | ISG20L2 | 718621    |
| Interferon, alpha 13                                  | IFNA13  | 709559    |
| Interferon, gamma-inducible protein 16                | IFI16   | 719253    |
| Interferon-related developmental regulator 1          | IFRD1   | 702624    |
| Interferon-related developmental regulator 2          | IFRD2   | 702959    |
| Interleukin 2 receptor subunit gamma                  | IL2RG   | 641338    |
| Interleukin 20 receptor subunit alpha                 | IL20RA  | 704890    |
| Interleukin 21 receptor                               | IL21R   | 705759    |
| Interleukin 6 signal transducer                       | IL6ST   | 574127    |
| Interleukin enhancer binding factor 2                 | ILF2    | 715452    |
| Interleukin enhancer binding factor 3                 | ILF3    | 713427    |
| Intermediate filament family orphan 1                 | IFFO1   | 712900    |
| Intestine-specific homeobox                           | ISX     | 717448    |
| Intraflagellar transport 172                          | IFT172  | 700948    |
| Intraflagellar transport 20                           | IFT20   | 715773    |
| Intraflagellar transport 22                           | IFT22   | 714551    |
| Intraflagellar transport 27                           | IFT27   | 697032    |
| Intraflagellar transport 46                           | IFT46   | 700582    |
| Intraflagellar transport 52                           | IFT52   | 694933    |
| Intraflagellar transport 57                           | IFT57   | 705088    |
| Intraflagellar transport 74                           | IFT74   | 707561    |
| Intraflagellar transport 80                           | IFT80   | 705146    |
| Intraflagellar transport 81                           | IFT81   | 710434    |
| Inturned planar cell polarity protein                 | INTU    | 709967    |
| IQ motif and Sec7 domain 1                            | IQSEC1  | 693922    |
| IQ motif and ubiquitin domain containing              | IQUB    | 695424    |
| IQ motif containing B1                                | IQCB1   | 715032    |
| IQ motif containing D                                 | IQCD    | 712904    |
| IQ motif containing gtpase activating protein 3       | IQGAP3  | 719575    |
| IQ motif containing K                                 | IQCK    | 695417    |

|                                                         |         |           |
|---------------------------------------------------------|---------|-----------|
| IQ motif containing with AAA domain 1                   | IQCA1   | 694173    |
| Iron-sulfur cluster assembly 2                          | ISCA2   | 700004    |
| Iron-sulfur cluster assembly enzyme                     | ISCU    | 705669    |
| Iroquois homeobox 6                                     | IRX6    | 698232    |
| Isocitrate dehydrogenase 2 (NADP+), mitochondrial       | IDH2    | 701480    |
| Isocitrate dehydrogenase 3 (NAD+) alpha                 | IDH3A   | 677715    |
| Isocitrate dehydrogenase 3 (NAD+) beta                  | IDH3B   | 716726    |
| Isocitrate dehydrogenase 3 (NAD+) gamma                 | IDH3G   | 698558    |
| Isoleucyl-trna synthetase                               | IARS    | 677705    |
| Isovaleryl-coa dehydrogenase                            | IVD     | 702867    |
| IWS1 homolog (S. Cerevisiae)                            | IWS1    | 699205    |
| Jade family PHD finger 1                                | JADE1   | 693690    |
| Jade family PHD finger 3                                | JADE3   | 711390    |
| Jagged 1                                                | JAG1    | 718580    |
| Jagunal homolog 1                                       | JAGN1   | 699718    |
| JAZF zinc finger 1                                      | JAZF1   | 697973    |
| JNK1/MAPK8-associated membrane protein                  | JKAMP   | 702307    |
| Jumonji domain containing 1C                            | JMJD1C  | 697630    |
| Jumonji domain containing 4                             | JMJD4   | 696580    |
| Kallikrein 3                                            | KLK3    | 719444    |
| Kallikrein related peptidase 8                          | KLK8    | 719488    |
| Kaptein (actin binding protein)                         | KPTN    | 717322    |
| Karyopherin alpha 1                                     | KPNA1   | 692082    |
| Karyopherin alpha 2 (RAG cohort 1, importin alpha 1)    | KPNA2   | 100430008 |
| Karyopherin alpha 3 (importin alpha 4)                  | KPNA3   | 706925    |
| Karyopherin alpha 4 (importin alpha 3)                  | KPNA4   | 702486    |
| Karyopherin alpha 6 (importin alpha 7)                  | KPNA6   | 706812    |
| KAT8 regulatory NSL complex subunit 1                   | KANSL1  | 717172    |
| Katanin p60 (ATPase containing) subunit A 1             | KATNA1  | 698291    |
| KDEL endoplasmic reticulum protein retention receptor 1 | KDELR1  | 717928    |
| KDEL endoplasmic reticulum protein retention receptor 2 | KDELR2  | 704335    |
| KDEL endoplasmic reticulum protein retention receptor 3 | KDELR3  | 700810    |
| KDEL motif containing 1                                 | KDELC1  | 702156    |
| Kelch domain containing 10                              | KLHDC10 | 702290    |
| Kelch domain containing 4                               | KLHDC4  | 695768    |
| Kelch domain containing 8B                              | KLHDC8B | 707348    |
| Kelch like family member 11                             | KLHL11  | 708393    |
| Kelch like family member 18                             | KLHL18  | 711943    |
| Kelch like family member 2                              | KLHL2   | 704790    |
| Kelch like family member 22                             | KLHL22  | 694160    |
| Kelch like family member 28                             | KLHL28  | 702075    |
| Kelch like family member 5                              | KLHL5   | 698740    |
| Kelch like family member 9                              | KLHL9   | 710804    |
| Kelch repeat and BTB (POZ) domain containing 2          | KBTBD2  | 709126    |
| Kell blood group, metallo-endopeptidase                 | KEL     | 703492    |
| Keratin 2, type II                                      | KRT2    | 699567    |
| Keratin 7, type II                                      | KRT7    | 697425    |
| Keratin 80, type II                                     | KRT80   | 697190    |



|                                                            |           |           |
|------------------------------------------------------------|-----------|-----------|
| Keratin associated protein 12-4                            | KRTAP12-4 | 712284    |
| Keratinocyte associated protein 3                          | KRTCAP3   | 701066    |
| Keratinocyte differentiation factor 1                      | KDF1      | 715312    |
| KH homology domain containing 1                            | KHDC1     | 715576    |
| KIAA0040 ortholog                                          | KIAA0040  | 100423512 |
| KIAA0100 ortholog                                          | KIAA0100  | 709307    |
| KIAA0232 ortholog                                          | KIAA0232  | 710141    |
| KIAA0355 ortholog                                          | KIAA0355  | 705202    |
| KIAA0556 ortholog                                          | KIAA0556  | 706125    |
| KIAA0907 ortholog                                          | KIAA0907  | 718005    |
| KIAA0922 ortholog                                          | KIAA0922  | 696761    |
| KIAA1524 ortholog                                          | KIAA1524  | 705690    |
| KIAA1958 ortholog                                          | KIAA1958  | 707028    |
| KIAA2013 ortholog                                          | KIAA2013  | 722762    |
| Kin17 DNA and RNA binding protein                          | KIN       | 713634    |
| Kinesin family member 15                                   | KIF15     | 714704    |
| Kinesin family member 1C                                   | KIF1C     | 721601    |
| Kinesin family member 22                                   | KIF22     | 706401    |
| Kinesin family member 23                                   | KIF23     | 695229    |
| Kinesin family member 2C                                   | KIF2C     | 705381    |
| Kinesin family member C3                                   | KIFC3     | 705951    |
| Kinesin heavy chain member 2A                              | KIF2A     | 696561    |
| Kinesin light chain 1                                      | KLC1      | 695677    |
| Kinesin light chain 2                                      | KLC2      | 714643    |
| Kinesin light chain 4                                      | KLC4      | 698356    |
| Kininogen 1                                                | KNG1      | 707466    |
| Kizuna centrosomal protein                                 | KIZ       | 700808    |
| KN motif and ankyrin repeat domains 1                      | KANK1     | 697569    |
| KRAB-A domain containing 1                                 | KRBA1     | 711863    |
| Kruppel-like factor 11                                     | KLF11     | 702323    |
| Kruppel-like factor 15                                     | KLF15     | 716386    |
| Kruppel-like factor 4 (gut)                                | KLF4      | 711169    |
| KTI12 chromatin associated homolog                         | KTI12     | 712824    |
| Kv channel interacting protein 2                           | KCNIP2    | 712434    |
| Kv channel interacting protein 3, calsenilin               | KCNIP3    | 704307    |
| Kxd1 motif containing 1                                    | KXD1      | 720235    |
| L-2-hydroxyglutarate dehydrogenase                         | L2HGDH    | 705721    |
| L-3-hydroxyproline dehydratase (trans-)                    | L3HYPDH   | 702076    |
| La ribonucleoprotein domain family member 4B               | LARP4B    | 721993    |
| La ribonucleoprotein domain family member 6                | LARP6     | 699664    |
| La ribonucleoprotein domain family member 7                | LARP7     | 703731    |
| Lactate dehydrogenase A                                    | LDHA      | 694309    |
| Lactate dehydrogenase B                                    | LDHB      | 706110    |
| Lamin B receptor                                           | LBR       | 700801    |
| Laminin subunit alpha 2                                    | LAMA2     | 715394    |
| Laminin subunit gamma 2                                    | LAMC2     | 715212    |
| Lanc lantibiotic synthetase component C-like 2 (bacterial) | LANCL2    | 704882    |
| Large tumor suppressor kinase 1                            | LATS1     | 696131    |

|                                                                                          |         |           |
|------------------------------------------------------------------------------------------|---------|-----------|
| Late endosomal/lysosomal adaptor, MAPK and MTOR activator 1                              | LAMTOR1 | 718249    |
| Late endosomal/lysosomal adaptor, MAPK and MTOR activator 2                              | LAMTOR2 | 718110    |
| Late endosomal/lysosomal adaptor, MAPK and MTOR activator 3                              | LAMTOR3 | 709133    |
| Layilin                                                                                  | LAYN    | 710211    |
| LCK proto-oncogene, Src family tyrosine kinase                                           | LCK     | 717704    |
| LDL receptor related protein 1                                                           | LRP1    | 710965    |
| LDL receptor related protein 10                                                          | LRP10   | 712506    |
| LDL receptor related protein 3                                                           | LRP3    | 703776    |
| LDL receptor related protein 4                                                           | LRP4    | 714038    |
| LDL receptor related protein 6                                                           | LRP6    | 695843    |
| LDL receptor related protein associated protein 1                                        | LRPAP1  | 699677    |
| Lectin, galactoside-binding, soluble, 3                                                  | LGALS3  | 697290    |
| Lectin, galactoside-binding, soluble, 7B                                                 | LGALS7B | 694781    |
| Lectin, mannose-binding, 1                                                               | LMAN1   | 697449    |
| LEM domain containing 2                                                                  | LEMD2   | 718463    |
| LETM1 domain containing 1                                                                | LETMD1  | 694422    |
| Leucine aminopeptidase 3                                                                 | LAP3    | 715081    |
| Leucine carboxyl methyltransferase 1                                                     | LCMT1   | 702050    |
| Leucine rich repeat (in FLII) interacting protein 1                                      | LRRFIP1 | 704379    |
| Leucine rich repeat and coiled-coil centrosomal protein 1                                | LRRCC1  | 707964    |
| Leucine rich repeat and fibronectin type III domain containing 3                         | LRFN3   | 711565    |
| Leucine rich repeat and fibronectin type III domain containing 4                         | LRFN4   | 713166    |
| Leucine rich repeat containing 1                                                         | LRRC1   | 710867    |
| Leucine rich repeat containing 17                                                        | LRRC17  | 695422    |
| Leucine rich repeat containing 18                                                        | LRRC18  | 710785    |
| Leucine rich repeat containing 20                                                        | LRRC20  | 710594    |
| Leucine rich repeat containing 28                                                        | LRRC28  | 708649    |
| Leucine rich repeat containing 34                                                        | LRRC34  | 697963    |
| Leucine rich repeat containing 3B                                                        | LRRC3B  | 701323    |
| Leucine rich repeat containing 42                                                        | LRRC42  | 714839    |
| Leucine rich repeat containing 45                                                        | LRRC45  | 715420    |
| Leucine rich repeat containing 49                                                        | LRRC49  | 696391    |
| Leucine rich repeat containing 75B                                                       | LRRC75B | 708086    |
| Leucine rich repeat protein 1                                                            | LRR1    | 706658    |
| Leucine rich transmembrane and O-methyltransferase domain containing                     | LRTOMT  | 718286    |
| Leucine zipper, down-regulated in cancer 1                                               | LDOC1   | 696902    |
| Leucine zipper, down-regulated in cancer 1-like                                          | LDOC1L  | 712760    |
| Leucine-rich repeat containing 8 family member D                                         | LRRC8D  | 100423128 |
| Leucine-rich repeat kinase 1                                                             | LRRK1   | 694358    |
| Leucine-rich repeats and calponin homology (CH) domain containing 2                      | LRCH2   | 708436    |
| Leucine-rich repeats and immunoglobulin-like domains 3                                   | LRIG3   | 716344    |
| Leucine-rich repeats and WD repeat domain containing 1                                   | LRWD1   | 715187    |
| Leukocyte immunoglobulin-like receptor, subfamily B (with TM and ITIM domains), member 1 | LILRB1  | 692340    |
| Leukocyte receptor cluster (LRC) member 1                                                | LENG1   | 693417    |
| Leukocyte-associated immunoglobulin-like receptor 1                                      | LAIR1   | 695533    |
| Leukotriene C4 synthase                                                                  | LTC4S   | 705233    |

|                                                                    |         |           |
|--------------------------------------------------------------------|---------|-----------|
| Leupaxin                                                           | LPXN    | 702033    |
| LFNG O-fucosylpeptide 3-beta-N-acetylglucosaminyltransferase       | LFNG    | 100428736 |
| Ligand dependent nuclear receptor interacting factor 1             | LRIF1   | 702445    |
| Ligase III, DNA, ATP-dependent                                     | LIG3    | 715181    |
| Like-glycosyltransferase                                           | LARGE   | 717403    |
| LIM and cysteine-rich domains 1                                    | LMCD1   | 702382    |
| LIM and SH3 protein 1                                              | LASP1   | 694950    |
| LIM domain binding 2                                               | LDB2    | 714918    |
| LIM domain containing 2                                            | LIMD2   | 717889    |
| Limb bud and heart development                                     | LBH     | 704749    |
| Lin-7 homolog B (C. Elegans)                                       | LIN7B   | 718587    |
| Lin-9 DREAM muvB core complex component                            | LIN9    | 699056    |
| Lipase, member H                                                   | LIPH    | 701743    |
| Lipid droplet associated hydrolase                                 | LDAH    | 717510    |
| Lipocalin 1                                                        | LCN1    | 711974    |
| Lipoma HMGIC fusion partner                                        | LHFP    | 696978    |
| Lipoma HMGIC fusion partner-like 2                                 | LHFPL2  | 709040    |
| Lipoprotein lipase                                                 | LPL     | 712887    |
| Lipoyltransferase 1                                                | LIPT1   | 708812    |
| Listerin E3 ubiquitin protein ligase 1                             | LTN1    | 714068    |
| Liver expressed antimicrobial peptide 2                            | LEAP2   | 709041    |
| LMBR1 domain containing 1                                          | LMBRD1  | 714710    |
| LMBR1 domain containing 2                                          | LMBRD2  | 700369    |
| LON peptidase N-terminal domain and ring finger 1                  | LONRF1  | 706469    |
| Low density lipoprotein receptor adaptor protein 1                 | LDLRAP1 | 713032    |
| Low density lipoprotein receptor class A domain containing 4       | LDLRAD4 | 701919    |
| LSM family member 14B                                              | LSM14B  | 700561    |
| LSM10, U7 small nuclear RNA associated                             | LSM10   | 713277    |
| LSM12 homolog                                                      | LSM12   | 714219    |
| LSM14A mRNA processing body assembly factor                        | LSM14A  | 705085    |
| LSM2 homolog, U6 small nuclear RNA and mRNA degradation associated | LSM2    | 715592    |
| LSM4 homolog, U6 small nuclear RNA and mRNA degradation associated | LSM4    | 720192    |
| LSM5 homolog, U6 small nuclear RNA and mRNA degradation associated | LSM5    | 693550    |
| LSM6 homolog, U6 small nuclear RNA and mRNA degradation associated | LSM6    | 703226    |
| LUC7-like 3 pre-mRNA splicing factor                               | LUC7L3  | 703662    |
| Ly6/neurotoxin 1                                                   | LYNX1   | 100428512 |
| LY6/PLAUR domain containing 6                                      | LYPD6   | 693649    |
| Lymphocyte antigen 6 complex, locus G6C                            | LY6G6C  | 716220    |
| Lymphocyte antigen 86                                              | LY86    | 711507    |
| Lymphoid enhancer-binding factor 1                                 | LEF1    | 695776    |
| LYN proto-oncogene, Src family tyrosine kinase                     | LYN     | 698553    |
| LYR motif containing 2                                             | LYRM2   | 701575    |
| Lysine (K)-specific demethylase 1A                                 | KDM1A   | 718609    |
| Lysine (K)-specific demethylase 3A                                 | KDM3A   | 697775    |
| Lysine (K)-specific demethylase 4B                                 | KDM4B   | 695760    |
| Lysine (K)-specific demethylase 8                                  | KDM8    | 703323    |
| Lysine (K)-specific methyltransferase 5B                           | KMT5B   | 710481    |
| Lysine-rich nucleolar protein 1                                    | KNOP1   | 695144    |

|                                                                                         |          |        |
|-----------------------------------------------------------------------------------------|----------|--------|
| Lysophosphatidic acid receptor 2                                                        | LPAR2    | 719844 |
| Lysophosphatidic acid receptor 6                                                        | LPAR6    | 705081 |
| Lysophosphatidylcholine acyltransferase 1                                               | LPCAT1   | 710144 |
| Lysophosphatidylcholine acyltransferase 3                                               | LPCAT3   | 714639 |
| Lysophospholipase II                                                                    | LYPLA2   | 719074 |
| Lysosomal protein transmembrane 4 alpha                                                 | LAPTM4A  | 701298 |
| Lysyl oxidase like 1                                                                    | LOXL1    | 706464 |
| Lysyl oxidase like 3                                                                    | LOXL3    | 709834 |
| Lysyl-trna synthetase                                                                   | KARS     | 714516 |
| Mab-21 domain containing 2                                                              | MB21D2   | 706284 |
| MACRO domain containing 1                                                               | MACROD1  | 717961 |
| Macrophage erythroblast attacher                                                        | MAEA     | 702015 |
| Macrophage stimulating 1                                                                | MST1     | 705811 |
| MAD2 mitotic arrest deficient-like 2 (yeast)                                            | MAD2L2   | 714527 |
| MAD2L1 binding protein                                                                  | MAD2L1BP | 701099 |
| Maestro heat-like repeat family member 8                                                | MROH8    | 701423 |
| MAF1 homolog, negative regulator of RNA polymerase III                                  | MAF1     | 700385 |
| MAGE family member D1                                                                   | MAGED1   | 696658 |
| MAGE family member D2                                                                   | MAGED2   | 701719 |
| MAGE family member F1                                                                   | MAGEF1   | 701676 |
| MAGE family member H1                                                                   | MAGEH1   | 703812 |
| Major facilitator superfamily domain containing 1                                       | MFSD1    | 703674 |
| Major facilitator superfamily domain containing 14A                                     | MFSD14A  | 711233 |
| Major facilitator superfamily domain containing 14B                                     | MFSD14B  | 708498 |
| Major facilitator superfamily domain containing 3                                       | MFSD3    | 703246 |
| Major facilitator superfamily domain containing 5                                       | MFSD5    | 702021 |
| MAK16 homolog                                                                           | MAK16    | 696648 |
| Makorin ring finger protein 1                                                           | MKRN1    | 716752 |
| Malate dehydrogenase 1                                                                  | MDH1     | 694703 |
| Male-enhanced antigen 1                                                                 | MEA1     | 699300 |
| Male-specific lethal 3 homolog (Drosophila)                                             | MSL3     | 720836 |
| Malonyl-coa-acyl carrier protein transacylase                                           | MCAT     | 711556 |
| Mannose phosphate isomerase                                                             | MPI      | 722129 |
| Mannose-6-phosphate receptor (cation dependent)                                         | M6PR     | 716696 |
| Mannose-P-dolichol utilization defect 1                                                 | MPDU1    | 715962 |
| Mannosidase, alpha, class 1B, member 1                                                  | MAN1B1   | 706918 |
| Mannosidase, alpha, class 2B, member 1                                                  | MAN2B1   | 716173 |
| Mannosidase, alpha, class 2C, member 1                                                  | MAN2C1   | 705599 |
| Mannosidase, beta A, lysosomal-like                                                     | MANBAL   | 701167 |
| Mannosyl (alpha-1,3-)-glycoprotein beta-1,2-N-acetylglucosaminyl transferase            | MGAT1    | 707375 |
| Mannosyl (alpha-1,3-)-glycoprotein beta-1,4-N-acetylglucosaminyl transferase, isozyme B | MGAT4B   | 705006 |
| Mannosyl (alpha-1,6-)-glycoprotein beta-1,2-N-acetylglucosaminyl transferase            | MGAT2    | 706426 |
| Mannosyl-oligosaccharide glucosidase                                                    | MOGS     | 708913 |
| MAP kinase interacting serine/threonine kinase 1                                        | MKNK1    | 710061 |
| MAP/microtubule affinity-regulating kinase 2                                            | MARK2    | 718065 |

|                                                       |          |           |
|-------------------------------------------------------|----------|-----------|
| MAP7 domain containing 1                              | MAP7D1   | 712899    |
| MAP-kinase activating death domain                    | MADD     | 713613    |
| MARCKS-like 1                                         | MARCKSL1 | 100428616 |
| Mastermind like transcriptional coactivator 1         | MAML1    | 715047    |
| Maternal embryonic leucine zipper kinase              | MELK     | 716875    |
| Matrilin 1, cartilage matrix protein                  | MATN1    | 704521    |
| Matrin 3                                              | MATR3    | 100568448 |
| Matrix metalloproteinase 25                           | MMP25    | 700486    |
| Matrix metalloproteinase 28                           | MMP28    | 574250    |
| Mckusick-Kaufman syndrome                             | MKKS     | 718547    |
| Mdm1 nuclear protein                                  | MDM1     | 718062    |
| MDM2 binding protein                                  | MTBP     | 703121    |
| MDM4, p53 regulator                                   | MDM4     | 699563    |
| Mediator complex subunit 10                           | MED10    | 694872    |
| Mediator complex subunit 11                           | MED11    | 709561    |
| Mediator complex subunit 13-like                      | MED13L   | 713867    |
| Mediator complex subunit 19                           | MED19    | 704421    |
| Mediator complex subunit 21                           | MED21    | 710699    |
| Mediator complex subunit 23                           | MED23    | 714629    |
| Mediator complex subunit 27                           | MED27    | 715219    |
| Mediator complex subunit 6                            | MED6     | 693320    |
| Mediator complex subunit 8                            | MED8     | 700676    |
| Mediator complex subunit 9                            | MED9     | 698957    |
| Mediator of cell motility 1                           | MEMO1    | 706051    |
| Megakaryoblastic leukemia (translocation) 1           | MKL1     | 100429360 |
| Meiosis 1 associated protein                          | M1AP     | 710210    |
| Meiosis specific nuclear structural 1                 | MNS1     | 699377    |
| Meiosis specific with OB domains                      | MEIOB    | 703322    |
| Meis homeobox 1                                       | MEIS1    | 697685    |
| Meis homeobox 2                                       | MEIS2    | 699748    |
| Melanocortin 2 receptor accessory protein 2           | MRAP2    | 695659    |
| Melatonin receptor 1A                                 | MTNR1A   | 702686    |
| Membrane bound transcription factor peptidase, site 2 | MBTPS2   | 696540    |
| Membrane frizzled-related protein                     | MFRP     | 704965    |
| Membrane magnesium transporter 1                      | MMGT1    | 710338    |
| Membrane protein, palmitoylated 1                     | MPP1     | 702092    |
| Meningioma expressed antigen 5 (hyaluronidase)        | MGEA5    | 712370    |
| Mercaptopyruvate sulfurtransferase                    | MPST     | 695842    |
| Mesoderm development candidate 1                      | MESDC1   | 713059    |
| Mesoderm induction early response 1, family member 2  | MIER2    | 701450    |
| Mesoderm specific transcript                          | MEST     | 703327    |
| Mesothelin                                            | MSLN     | 698095    |
| Metadherin                                            | MTDH     | 702410    |
| Metal response element binding transcription factor 2 | MTF2     | 707104    |
| Metallo-beta-lactamase domain containing 2            | MBLAC2   | 695437    |
| Metallophosphoesterase domain containing 2            | MPPED2   | 696968    |
| Metallothionein 3                                     | MT3      | 700602    |
| Metal-regulatory transcription factor 1               | MTF1     | 714795    |

|                                                                                                                                                |          |           |
|------------------------------------------------------------------------------------------------------------------------------------------------|----------|-----------|
| Metastasis associated 1 family member 2                                                                                                        | MTA2     | 718772    |
| Metastasis associated 1 family member 3                                                                                                        | MTA3     | 712967    |
| Metaxin 1                                                                                                                                      | MTX1     | 717595    |
| Methenyltetrahydrofolate synthetase domain containing                                                                                          | MTHFSD   | 694732    |
| Methionine adenosyltransferase II, alpha                                                                                                       | MAT2A    | 695362    |
| Methionine sulfoxide reductase B1                                                                                                              | MSRB1    | 693358    |
| Methionine sulfoxide reductase B3                                                                                                              | MSRB3    | 717617    |
| Methionyl aminopeptidase 2                                                                                                                     | METAP2   | 712400    |
| Methionyl-trna synthetase                                                                                                                      | MARS     | 714744    |
| Methyl-cpg binding domain 4 DNA glycosylase                                                                                                    | MBD4     | 720557    |
| Methylcrotonoyl-coa carboxylase 1                                                                                                              | MCCC1    | 708258    |
| Methylenetetrahydrofolate dehydrogenase (NADP+ dependent) 1,<br>methenyltetrahydrofolate cyclohydrolase, formyltetra<br>hydrofolate synthetase | MTHFD1   | 707059    |
| Methylmalonic aciduria (cobalamin deficiency) cblb type                                                                                        | MMAB     | 708973    |
| Methylmalonic aciduria (cobalamin deficiency) cbld type,<br>with homocystinuria                                                                | MMADHC   | 693783    |
| Methylmalonyl coa epimerase                                                                                                                    | MCEE     | 704094    |
| Methyltransferase like 1                                                                                                                       | METTL1   | 715796    |
| Methyltransferase like 13                                                                                                                      | METTL13  | 704943    |
| Methyltransferase like 17                                                                                                                      | METTL17  | 705009    |
| Methyltransferase like 18                                                                                                                      | METTL18  | 701890    |
| Methyltransferase like 21A                                                                                                                     | METTL21A | 710435    |
| Methyltransferase like 22                                                                                                                      | METTL22  | 708739    |
| Methyltransferase like 3                                                                                                                       | METTL3   | 706852    |
| Methyltransferase like 8                                                                                                                       | METTL8   | 695361    |
| Methyltransferase like 9                                                                                                                       | METTL9   | 698159    |
| Mevalonate kinase                                                                                                                              | MVK      | 707645    |
| Microfibrillar associated protein 2                                                                                                            | MFAP2    | 710885    |
| Microsomal glutathione S-transferase 1                                                                                                         | MGST1    | 701652    |
| Microsomal glutathione S-transferase 2                                                                                                         | MGST2    | 697983    |
| Microsomal glutathione S-transferase 3                                                                                                         | MGST3    | 695275    |
| Microtubule associated monooxygenase, calponin and LIM<br>domain containing 1                                                                  | MICAL1   | 698737    |
| Microtubule associated protein 1 light chain 3 alpha                                                                                           | MAP1LC3A | 707439    |
| Microtubule associated protein 1B                                                                                                              | MAP1B    | 574272    |
| Microtubule associated protein 1S                                                                                                              | MAP1S    | 719196    |
| Microtubule associated protein 2                                                                                                               | MAP2     | 710840    |
| Microtubule associated protein 4                                                                                                               | MAP4     | 100423616 |
| Microtubule associated protein RP/EB family member 1                                                                                           | MAPRE1   | 711404    |
| Microtubule-associated protein 7                                                                                                               | MAP7     | 705355    |
| Midline 1                                                                                                                                      | MID1     | 709683    |
| Migration and invasion enhancer 1                                                                                                              | MIEN1    | 697837    |
| Mindbomb E3 ubiquitin protein ligase 1                                                                                                         | MIB1     | 699340    |
| Minichromosome maintenance complex component 3                                                                                                 | MCM3     | 708320    |
| Minichromosome maintenance complex component 3 associated<br>protein                                                                           | MCM3AP   | 721810    |
| Minichromosome maintenance complex component 5                                                                                                 | MCM5     | 717548    |

|                                                         |          |           |
|---------------------------------------------------------|----------|-----------|
| Minichromosome maintenance complex component 7          | MCM7     | 710766    |
| MIS12 kinetochore complex component                     | MIS12    | 712202    |
| Missing oocyte, meiosis regulator, homolog (Drosophila) | MIOS     | 696371    |
| Mitochondrial assembly of ribosomal large subunit 1     | MALSU1   | 704884    |
| Mitochondrial carrier 1                                 | MTCH1    | 719313    |
| Mitochondrial E3 ubiquitin protein ligase 1             | MUL1     | 705429    |
| Mitochondrial elongation factor 2                       | MIEF2    | 700705    |
| Mitochondrial fission regulator 1                       | MTFR1    | 711143    |
| Mitochondrial fission regulator 1-like                  | MTFR1L   | 713213    |
| Mitochondrial genome maintenance exonuclease 1          | MGME1    | 696467    |
| Mitochondrial intermediate peptidase                    | MIPEP    | 707131    |
| Mitochondrial nucleoid factor 1                         | C6orf125 | 100425664 |
| Mitochondrial poly(A) polymerase                        | MTPAP    | 694491    |
| Mitochondrial pyruvate carrier 1                        | MPC1     | 716864    |
| Mitochondrial ribosomal protein L10                     | MRPL10   | 695136    |
| Mitochondrial ribosomal protein L11                     | MRPL11   | 714094    |
| Mitochondrial ribosomal protein L12                     | MRPL12   | 714438    |
| Mitochondrial ribosomal protein L13                     | MRPL13   | 702994    |
| Mitochondrial ribosomal protein L16                     | MRPL16   | 698831    |
| Mitochondrial ribosomal protein L18                     | MRPL18   | 702629    |
| Mitochondrial ribosomal protein L19                     | MRPL19   | 711081    |
| Mitochondrial ribosomal protein L20                     | MRPL20   | 701533    |
| Mitochondrial ribosomal protein L22                     | MRPL22   | 714920    |
| Mitochondrial ribosomal protein L23                     | MRPL23   | 704210    |
| Mitochondrial ribosomal protein L24                     | MRPL24   | 718640    |
| Mitochondrial ribosomal protein L28                     | MRPL28   | 695310    |
| Mitochondrial ribosomal protein L33                     | MRPL33   | 702783    |
| Mitochondrial ribosomal protein L34                     | MRPL34   | 719004    |
| Mitochondrial ribosomal protein L36                     | MRPL36   | 100430880 |
| Mitochondrial ribosomal protein L37                     | MRPL37   | 715168    |
| Mitochondrial ribosomal protein L39                     | MRPL39   | 708631    |
| Mitochondrial ribosomal protein L40                     | MRPL40   | 711629    |
| Mitochondrial ribosomal protein L41                     | MRPL41   | 702768    |
| Mitochondrial ribosomal protein L42                     | MRPL42   | 715676    |
| Mitochondrial ribosomal protein L46                     | MRPL46   | 697872    |
| Mitochondrial ribosomal protein L48                     | MRPL48   | 718240    |
| Mitochondrial ribosomal protein L49                     | MRPL49   | 716796    |
| Mitochondrial ribosomal protein L50                     | MRPL50   | 713923    |
| Mitochondrial ribosomal protein L51                     | MRPL51   | 713036    |
| Mitochondrial ribosomal protein L53                     | MRPL53   | 709302    |
| Mitochondrial ribosomal protein L55                     | MRPL55   | 695962    |
| Mitochondrial ribosomal protein L9                      | MRPL9    | 711235    |
| Mitochondrial ribosomal protein S11                     | MRPS11   | 697743    |
| Mitochondrial ribosomal protein S12                     | MRPS12   | 695196    |
| Mitochondrial ribosomal protein S17                     | MRPS17   | 703678    |
| Mitochondrial ribosomal protein S18A                    | MRPS18A  | 701465    |
| Mitochondrial ribosomal protein S21                     | MRPS21   | 706805    |
| Mitochondrial ribosomal protein S22                     | MRPS22   | 715845    |

|                                                             |          |           |
|-------------------------------------------------------------|----------|-----------|
| Mitochondrial ribosomal protein S23                         | MRPS23   | 708818    |
| Mitochondrial ribosomal protein S24                         | MRPS24   | 700722    |
| Mitochondrial ribosomal protein S26                         | MRPS26   | 717038    |
| Mitochondrial ribosomal protein S28                         | MRPS28   | 699755    |
| Mitochondrial ribosomal protein S30                         | MRPS30   | 701699    |
| Mitochondrial ribosomal protein S33                         | MRPS33   | 693681    |
| Mitochondrial ribosomal protein S34                         | MRPS34   | 702487    |
| Mitochondrial ribosomal protein S35                         | MRPS35   | 710109    |
| Mitochondrial ribosomal protein S6                          | MRPS6    | 106997264 |
| Mitochondrial ribosomal protein S7                          | MRPS7    | 701800    |
| Mitochondrial ribosomal protein S9                          | MRPS9    | 712968    |
| Mitochondrial ribosome recycling factor                     | MRRF     | 700902    |
| Mitochondrial trans-2-enoyl-coa reductase                   | MECR     | 717425    |
| Mitochondrial transcription termination factor 3            | MTERF3   | 701366    |
| Mitochondrial translational initiation factor 2             | MTIF2    | 717042    |
| Mitochondrial translational initiation factor 3             | MTIF3    | 710571    |
| Mitofusin 1                                                 | MFN1     | 709570    |
| Mitogen-activated protein kinase 1                          | MAPK1    | 698569    |
| Mitogen-activated protein kinase 12                         | MAPK12   | 715745    |
| Mitogen-activated protein kinase 7                          | MAPK7    | 702837    |
| Mitogen-activated protein kinase 8                          | MAPK8    | 711115    |
| Mitogen-activated protein kinase 8 interacting protein 1    | MAPK8IP1 | 714950    |
| Mitogen-activated protein kinase associated protein 1       | MAPKAP1  | 702599    |
| Mitogen-activated protein kinase kinase 1                   | MAP2K1   | 710415    |
| Mitogen-activated protein kinase kinase 2                   | MAP2K2   | 721821    |
| Mitogen-activated protein kinase kinase 4                   | MAP2K4   | 718155    |
| Mitogen-activated protein kinase kinase 5                   | MAP2K5   | 711672    |
| Mitogen-activated protein kinase kinase kinase 11           | MAP3K11  | 716038    |
| Mitogen-activated protein kinase kinase kinase 13           | MAP3K13  | 701085    |
| Mitogen-activated protein kinase kinase kinase 3            | MAP3K3   | 717866    |
| Mitogen-activated protein kinase kinase kinase 4            | MAP3K4   | 710360    |
| Mitogen-activated protein kinase kinase kinase 6            | MAP3K6   | 715911    |
| Mitogen-activated protein kinase kinase kinase kinase 1     | MAP4K1   | 694259    |
| Mitogen-activated protein kinase kinase kinase kinase 2     | MAP4K2   | 699331    |
| Mitogen-activated protein kinase kinase kinase kinase 4     | MAP4K4   | 716595    |
| Mitogen-activated protein kinase kinase kinase kinase 5     | MAP4K5   | 706204    |
| Mitogen-activated protein kinase-activated protein kinase 2 | MAPKAPK2 | 695044    |
| Mitogen-activated protein kinase-activated protein kinase 3 | MAPKAPK3 | 701320    |
| Mitogen-activated protein kinase-activated protein kinase 5 | MAPKAPK5 | 713521    |
| Mitotic spindle organizing protein 2B                       | MZT2B    | 701787    |
| Mixed lineage kinase domain-like                            | MLKL     | 710316    |
| MNAT CDK-activating kinase assembly factor 1                | MNAT1    | 703905    |
| MOB family member 4, phocein                                | MOB4     | 698149    |
| Molybdenum cofactor synthesis 2                             | MOCS2    | 703689    |
| MON1 homolog A, secretory trafficking associated            | MON1A    | 704497    |
| MON1 homolog B, secretory trafficking associated            | MON1B    | 715104    |
| Monoacylglycerol O-acyltransferase 1                        | MOGAT1   | 705924    |
| Monocyte to macrophage differentiation-associated           | MMD      | 706723    |



|                                                                  |           |           |
|------------------------------------------------------------------|-----------|-----------|
| MORC family CW-type zinc finger 4                                | MORC4     | 701136    |
| Morf4 family associated protein 1                                | MRFAP1    | 710771    |
| Morf4 family associated protein 1-like 1                         | MRFAP1L1  | 710411    |
| MORN repeat containing 2                                         | MORN2     | 106992912 |
| Mortality factor 4 like 1                                        | MORF4L1   | 711357    |
| Motile sperm domain containing 2                                 | MOSPD2    | 712225    |
| Mov10 RISC complex RNA helicase                                  | MOV10     | 705910    |
| M-phase phosphoprotein 10 (U3 small nucleolar ribonucleoprotein) | MPHOSPH10 | 704207    |
| M-phase phosphoprotein 6                                         | MPHOSPH6  | 714335    |
| M-phase specific PLK1 interacting protein                        | MPLKIP    | 703092    |
| Mpv17 mitochondrial inner membrane protein                       | MPV17     | 701026    |
| MPV17 mitochondrial membrane protein-like 2                      | MPV17L2   | 719413    |
| MRS2, magnesium transporter                                      | MRS2      | 707676    |
| Msh homeobox 2                                                   | MSX2      | 694227    |
| MSS51 mitochondrial translational activator                      | MSS51     | 707066    |
| Mucolipin 1                                                      | MCOLN1    | 703775    |
| Multiple C2 domains, transmembrane 2                             | MCTP2     | 706949    |
| Multiple inositol-polyphosphate phosphatase 1                    | MINPP1    | 704362    |
| Multivesicular body subunit 12A                                  | MVB12A    | 716261    |
| MUS81 structure-specific endonuclease subunit                    | MUS81     | 715558    |
| Musashi RNA binding protein 2                                    | MSI2      | 100423536 |
| Muscleblind like splicing regulator 1                            | MBNL1     | 708735    |
| Mutl homolog 1                                                   | MLH1      | 698782    |
| Muty DNA glycosylase                                             | MUTYH     | 705651    |
| MYB binding protein (P160) 1a                                    | MYBBP1A   | 708817    |
| Myb/SANT-like DNA-binding domain containing 2                    | MSANTD2   | 712347    |
| Myb/SANT-like DNA-binding domain containing 4 with coiled-coils  | MSANTD4   | 706055    |
| MYC associated factor X                                          | MAX       | 708228    |
| Myc target 1                                                     | MYCT1     | 711296    |
| MYCBP associated protein                                         | MYCBPAP   | 705880    |
| Myelin protein zero                                              | MPZ       | 719969    |
| Myelin protein zero-like 2                                       | MPZL2     | 699330    |
| Myeloid cell leukemia 1                                          | MCL1      | 707539    |
| Myeloid cell nuclear differentiation antigen                     | MNDA      | 719220    |
| Myeloid differentiation primary response 88                      | MYD88     | 696494    |
| Myeloid leukemia factor 1                                        | MLF1      | 704116    |
| Myeloid zinc finger 1                                            | MZF1      | 712144    |
| Myeloid/lymphoid or mixed-lineage leukemia; translocated to, 11  | MLLT11    | 709190    |
| Myeloid/lymphoid or mixed-lineage leukemia; translocated to, 6   | MLLT6     | 694045    |
| Myocyte enhancer factor 2A                                       | MEF2A     | 708956    |
| Myocyte enhancer factor 2B                                       | MEF2B     | 100568440 |
| Myod family inhibitor                                            | MDFI      | 694074    |
| Myomesin 1                                                       | MYOM1     | 695301    |
| Myosin IA                                                        | MYO1A     | 714033    |
| Myosin light chain 4                                             | MYL4      | 717354    |
| Myosin light chain 6                                             | MYL6      | 711889    |
| Myosin light chain kinase 3                                      | MYLK3     | 716132    |
| Myosin, light chain 12A, regulatory, non-sarcomeric              | MYL12A    | 695077    |

|                                                                    |         |         |
|--------------------------------------------------------------------|---------|---------|
| Myotrophin                                                         | MTPN    | 708941  |
| Myotubularin 1                                                     | MTM1    | 703131  |
| Myotubularin related protein 11                                    | MTMR11  | 705542  |
| Myotubularin related protein 2                                     | MTMR2   | 699703  |
| Myotubularin related protein 4                                     | MTMR4   | 714621  |
| Myotubularin related protein 6                                     | MTMR6   | 709118  |
| Myristoylated alanine-rich protein kinase C substrate              | MARCKS  | 694077  |
| MYST/Esa1-associated factor 6                                      | MEAF6   | 713666  |
| N(alpha)-acetyltransferase 15, nata auxiliary subunit              | NAA15   | 697123  |
| N(alpha)-acetyltransferase 30, natc catalytic subunit              | NAA30   | 699379  |
| N(alpha)-acetyltransferase 35, natc auxiliary subunit              | NAA35   | 710122  |
| N(alpha)-acetyltransferase 50, nate catalytic subunit              | NAA50   | 709764  |
| N(alpha)-acetyltransferase 60, natf catalytic subunit              | NAA60   | 703207  |
| N-6 adenine-specific DNA methyltransferase 2 (putative)            | N6AMT2  | 703665  |
| NACC family member 2, BEN and BTB (POZ) domain containing          | NACC2   | 721794  |
| N-acetylglucosamine kinase                                         | NAGK    | 703976  |
| N-acetylglucosamine-1-phosphate transferase, gamma subunit         | GNPTG   | 722441  |
| N-acetylglucosamine-1-phosphodiester alpha-N-acetylglucosaminidase | NAGPA   | 707352  |
| N-acetylglutamate synthase                                         | NAGS    | 714102  |
| N-acetyltransferase 6 (GCN5-related)                               | NAT6    | 703022  |
| NAD(P) dependent steroid dehydrogenase-like                        | NSDHL   | 693333  |
| NAD(P)H dehydrogenase, quinone 2                                   | NQO2    | 707675  |
| NADH dehydrogenase subunit 1                                       | ND1     | 2846627 |
| NADH:ubiquinone oxidoreductase complex assembly factor 1           | NDUFAF1 | 710275  |
| NADH:ubiquinone oxidoreductase complex assembly factor 2           | NDUFAF2 | 693441  |
| NADH:ubiquinone oxidoreductase complex assembly factor 3           | NDUFAF3 | 708623  |
| NADH:ubiquinone oxidoreductase complex assembly factor 4           | NDUFAF4 | 705102  |
| NADH:ubiquinone oxidoreductase complex assembly factor 6           | NDUFAF6 | 700515  |
| NADH:ubiquinone oxidoreductase complex assembly factor 7           | NDUFAF7 | 709473  |
| NADH:ubiquinone oxidoreductase core subunit S2                     | NDUFS2  | 719935  |
| NADH:ubiquinone oxidoreductase core subunit S3                     | NDUFS3  | 713040  |
| NADH:ubiquinone oxidoreductase core subunit S8                     | NDUFS8  | 710845  |
| NADH:ubiquinone oxidoreductase subunit A1                          | NDUFA1  | 694635  |
| NADH:ubiquinone oxidoreductase subunit A12                         | NDUFA12 | 711970  |
| NADH:ubiquinone oxidoreductase subunit A2                          | NDUFA2  | 697736  |
| NADH:ubiquinone oxidoreductase subunit A8                          | NDUFA8  | 698706  |
| NADH:ubiquinone oxidoreductase subunit AB1                         | NDUFAB1 | 700718  |
| NADH:ubiquinone oxidoreductase subunit B10                         | NDUFB10 | 693482  |
| NADH:ubiquinone oxidoreductase subunit B2                          | NDUFB2  | 693431  |
| NADH:ubiquinone oxidoreductase subunit B4                          | NDUFB4  | 713428  |
| NADH:ubiquinone oxidoreductase subunit B5                          | NDUFB5  | 708821  |
| NADH:ubiquinone oxidoreductase subunit B7                          | NDUFB7  | 717849  |
| NADH:ubiquinone oxidoreductase subunit B8                          | NDUFB8  | 710521  |
| NADH:ubiquinone oxidoreductase subunit B9                          | NDUFB9  | 711387  |
| NADH:ubiquinone oxidoreductase subunit C1                          | NDUFC1  | 697242  |
| NADH:ubiquinone oxidoreductase subunit S4                          | NDUFS4  | 704137  |
| NADH:ubiquinone oxidoreductase subunit S6                          | NDUFS6  | 709426  |
| Nascent polypeptide-associated complex alpha subunit               | NACA    | 713416  |

|                                                                                                |         |           |
|------------------------------------------------------------------------------------------------|---------|-----------|
| Natriuretic peptide receptor 2                                                                 | NPR2    | 695750    |
| Natural killer cell granule protein 7                                                          | NKG7    | 719624    |
| NCK adaptor protein 1                                                                          | NCK1    | 716807    |
| NCK adaptor protein 2                                                                          | NCK2    | 713287    |
| NCK interacting protein with SH3 domain                                                        | NCKIPSD | 709410    |
| NDC80 kinetochore complex component                                                            | NDC80   | 696232    |
| NECAP endocytosis associated 1                                                                 | NECAP1  | 716035    |
| NECAP endocytosis associated 2                                                                 | NECAP2  | 698687    |
| NEDD4 binding protein 2                                                                        | N4BP2   | 700365    |
| Nedd4 family interacting protein 1                                                             | NDFIP1  | 705716    |
| Nedd4 family interacting protein 2                                                             | NDFIP2  | 698464    |
| NEDD8 activating enzyme E1 subunit 1                                                           | NAE1    | 696429    |
| Negative elongation factor complex member C/D                                                  | NELFCD  | 696053    |
| Negative elongation factor complex member E                                                    | NELFE   | 716913    |
| Negative regulator of ubiquitin-like proteins 1                                                | NUB1    | 715231    |
| Nei-like DNA glycosylase 3                                                                     | NEIL3   | 699618    |
| Nerve growth factor receptor (TNFRSF16) associated protein 1                                   | NGFRAP1 | 100428976 |
| N-ethylmaleimide-sensitive factor attachment protein, gamma                                    | NAPG    | 704546    |
| Netrin G2                                                                                      | NTNG2   | 715127    |
| Neugrin, neurite outgrowth associated                                                          | NGRN    | 702187    |
| Neural precursor cell expressed, developmentally down-regulated 1                              | NEDD1   | 713673    |
| Neural precursor cell expressed, developmentally down-regulated 4, E3 ubiquitin protein ligase | NEDD4   | 699550    |
| Neural precursor cell expressed, developmentally down-regulated 8                              | NEDD8   | 715763    |
| Neural precursor cell expressed, developmentally down-regulated 9                              | NEDD9   | 699359    |
| Neural proliferation, differentiation and control, 1                                           | NPDC1   | 707453    |
| Neuralized E3 ubiquitin protein ligase 2                                                       | NEURL2  | 708904    |
| Neurensin 1                                                                                    | NRSN1   | 707362    |
| Neurexophilin and PC-esterase domain family member 3                                           | NXPE3   | 702612    |
| Neuroglobin                                                                                    | NGB     | 641331    |
| Neurologin 2                                                                                   | NLGN2   | 574368    |
| Neurologin 3                                                                                   | NLGN3   | 574216    |
| Neurologin 4, Y-linked                                                                         | NLGN4Y  | 100270696 |
| Neuromedin U                                                                                   | NMU     | 697171    |
| Neuron navigator 2                                                                             | NAV2    | 702146    |
| Neuronal cell adhesion molecule                                                                | NRCAM   | 574228    |
| Neuronal PAS domain protein 2                                                                  | NPAS2   | 710480    |
| Neuronal regeneration related protein                                                          | NREP    | 712463    |
| Neuronal tyrosine-phosphorylated phosphoinositide-3-kinase adaptor 1                           | NYAP1   | 719205    |
| Neuropeptide FF-amide peptide precursor                                                        | NPFF    | 703412    |
| Neuropilin 1                                                                                   | NRP1    | 697755    |
| NFKB activating protein                                                                        | NKAP    | 694891    |
| NFKB inhibitor interacting Ras-like 1                                                          | NKIRAS1 | 699598    |
| NFKB repressing factor                                                                         | NKRF    | 693851    |
| NGFI-A binding protein 2 (EGR1 binding protein 2)                                              | NAB2    | 714209    |
| N-glycanase 1                                                                                  | NGLY1   | 700842    |
| NHL repeat containing 2                                                                        | NHLRC2  | 698009    |
| NHL repeat containing 3                                                                        | NHLRC3  | 696852    |

|                                                               |         |           |
|---------------------------------------------------------------|---------|-----------|
| NHP2 ribonucleoprotein                                        | NHP2    | 701950    |
| Nicastrin                                                     | NCSTN   | 719696    |
| Nicotinamide N-methyltransferase                              | NNMT    | 695185    |
| Nicotinamide nucleotide transhydrogenase                      | NNT     | 701110    |
| Nidogen 1                                                     | NID1    | 711154    |
| Niemann-Pick disease, type C2                                 | NPC2    | 699881    |
| NIMA-related kinase 1                                         | NEK1    | 694345    |
| NIMA-related kinase 2                                         | NEK2    | 711473    |
| NIMA-related kinase 3                                         | NEK3    | 710127    |
| NIN1/RPN12 binding protein 1 homolog                          | NOB1    | 705344    |
| Ninein                                                        | NIN     | 709532    |
| Ninjurin 1                                                    | NINJ1   | 717218    |
| Nitric oxide associated 1                                     | NOA1    | 693437    |
| Nitric oxide synthase interacting protein                     | NOSIP   | 718888    |
| Nitric oxide synthase trafficking                             | NOSTRIN | 705063    |
| NLR family member X1                                          | NLRX1   | 703981    |
| NLR family, pyrin domain containing 3                         | NLRP3   | 701278    |
| NMD3 ribosome export adaptor                                  | NMD3    | 701677    |
| NME/NM23 nucleoside diphosphate kinase 2                      | NME2    | 100533960 |
| N-methylpurine DNA glycosylase                                | MPG     | 722257    |
| NOC2-like nucleolar associated transcriptional repressor      | NOC2L   | 697809    |
| Noggin                                                        | NOG     | 707338    |
| Non imprinted in Prader-Willi/Angelman syndrome 2             | NIPA2   | 710147    |
| Non-POU domain containing, octamer-binding                    | NONO    | 697263    |
| Non-SMC condensin II complex subunit D3                       | NCAPD3  | 700276    |
| Non-SMC condensin II complex subunit H2                       | NCAPH2  | 716120    |
| NOP16 nucleolar protein                                       | NOP16   | 696768    |
| NOP2 nucleolar protein                                        | NOP2    | 713097    |
| NOP2/Sun RNA methyltransferase family member 5                | NSUN5   | 716219    |
| NOP58 ribonucleoprotein                                       | NOP58   | 703859    |
| NOP9 nucleolar protein                                        | NOP9    | 715969    |
| Norrie disease (pseudoglioma)                                 | NDP     | 702203    |
| NPL4 homolog, ubiquitin recognition factor                    | NPLOC4  | 713927    |
| NPR2-like, GATOR1 complex subunit                             | NPRL2   | 701924    |
| NRDE-2, necessary for RNA interference, domain containing     | NRDE2   | 695676    |
| NSA2, ribosome biogenesis homolog                             | NSA2    | 704670    |
| NSE1 homolog, SMC5-SMC6 complex component                     | NSMCE1  | 703436    |
| NSE3 homolog, SMC5-SMC6 complex component                     | NSMCE3  | 712714    |
| NSE4 homolog A, SMC5-SMC6 complex component                   | NSMCE4A | 705375    |
| NSF attachment protein alpha                                  | NAPA    | 717355    |
| NSFL1 (p97) cofactor (p47)                                    | NSFL1C  | 715743    |
| NSL1, MIS12 kinetochore complex component                     | NSL1    | 710371    |
| N-terminal asparagine amidase                                 | NTAN1   | 100427568 |
| N-terminal Xaa-Pro-Lys N-methyltransferase 1                  | NTMT1   | 716763    |
| Nth-like DNA glycosylase 1                                    | NTHL1   | 694848    |
| Nuclear assembly factor 1 ribonucleoprotein                   | NAF1    | 702745    |
| Nuclear casein kinase and cyclin-dependent kinase substrate 1 | NUCKS1  | 697298    |
| Nuclear envelope integral membrane protein 1                  | NEMP1   | 710700    |

|                                                                                     |        |        |
|-------------------------------------------------------------------------------------|--------|--------|
| Nuclear factor I/A                                                                  | NFIA   | 694022 |
| Nuclear factor of activated T-cells, cytoplasmic, calcineurin-dependent 3           | NFATC3 | 702390 |
| Nuclear factor of kappa light polypeptide gene enhancer in B-cells 1                | NFKB1  | 710324 |
| Nuclear factor of kappa light polypeptide gene enhancer in B-cells inhibitor, alpha | NFKBIA | 695335 |
| Nuclear factor of kappa light polypeptide gene enhancer in B-cells inhibitor, beta  | NFKBIB | 694844 |
| Nuclear factor related to kappaB binding protein                                    | NFRKB  | 718750 |
| Nuclear factor, erythroid 2 like 1                                                  | NFE2L1 | 695404 |
| Nuclear factor, erythroid 2 like 2                                                  | NFE2L2 | 707606 |
| Nuclear factor, interleukin 3 regulated                                             | NFIL3  | 704757 |
| Nuclear fragile X mental retardation protein interacting protein 2                  | NUFIP2 | 711330 |
| Nuclear prelamin A recognition factor                                               | NARF   | 716259 |
| Nuclear prelamin A recognition factor-like                                          | NARFL  | 722381 |
| Nuclear protein, ataxia-telangiectasia locus                                        | NPAT   | 707873 |
| Nuclear receptor binding protein 1                                                  | NRBP1  | 700821 |
| Nuclear receptor binding SET domain protein 1                                       | NSD1   | 706131 |
| Nuclear receptor coactivator 4                                                      | NCOA4  | 709509 |
| Nuclear receptor coactivator 5                                                      | NCOA5  | 717054 |
| Nuclear receptor coactivator 6                                                      | NCOA6  | 706903 |
| Nuclear receptor subfamily 1 group H member 3                                       | NR1H3  | 713679 |
| Nuclear receptor subfamily 1 group I member 2                                       | NR1I2  | 574226 |
| Nuclear receptor subfamily 2 group F member 2                                       | NR2F2  | 707483 |
| Nuclear RNA export factor 1                                                         | NXF1   | 718420 |
| Nuclear RNA export factor 3                                                         | NXF3   | 695351 |
| Nuclear transcription factor Y subunit alpha                                        | NFYA   | 719697 |
| Nuclear transcription factor Y subunit gamma                                        | NFYC   | 696290 |
| Nuclear transcription factor, X-box binding 1                                       | NFX1   | 702945 |
| Nuclear transport factor 2                                                          | NUTF2  | 700488 |
| Nuclear transport factor 2-like export factor 1                                     | NXT1   | 711846 |
| Nuclear transport factor 2-like export factor 2                                     | NXT2   | 704593 |
| Nucleic acid binding protein 2                                                      | NABP2  | 709344 |
| Nucleobindin 2                                                                      | NUCB2  | 697084 |
| Nucleolar and coiled-body phosphoprotein 1                                          | NOLC1  | 712789 |
| Nucleolar protein 8                                                                 | NOL8   | 705799 |
| Nucleolar protein interacting with the FHA domain of MKI67                          | NIFK   | 697198 |
| Nucleolin                                                                           | NCL    | 720965 |
| Nucleoporin 107kda                                                                  | NUP107 | 718214 |
| Nucleoporin 153kda                                                                  | NUP153 | 703888 |
| Nucleoporin 205kda                                                                  | NUP205 | 708216 |
| Nucleoporin 210kda                                                                  | NUP210 | 693669 |
| Nucleoporin 35kda                                                                   | NUP35  | 706497 |
| Nucleoporin 50kda                                                                   | NUP50  | 713282 |
| Nucleoporin 85kda                                                                   | NUP85  | 705628 |
| Nucleoporin 88kda                                                                   | NUP88  | 711734 |
| Nucleoporin like 2                                                                  | NUPL2  | 705213 |
| Nucleoside-triphosphatase, cancer-related                                           | NTPCR  | 712959 |

|                                                           |         |           |
|-----------------------------------------------------------|---------|-----------|
| Nucleosome assembly protein 1-like 3                      | NAP1L3  | 697636    |
| Nucleosome assembly protein 1-like 5                      | NAP1L5  | 703223    |
| Nucleotide binding oligomerization domain containing 1    | NOD1    | 695655    |
| Nudc domain containing 3                                  | NUDCD3  | 699353    |
| Nudc nuclear distribution protein                         | NUDC    | 719986    |
| Nude neurodevelopment protein 1                           | NDE1    | 717754    |
| Nude neurodevelopment protein 1-like 1                    | NDEL1   | 721973    |
| Nudix hydrolase 1                                         | NUDT1   | 713078    |
| Nudix hydrolase 2                                         | NUDT2   | 701795    |
| Nudix hydrolase 22                                        | NUDT22  | 717864    |
| Nudix hydrolase 3                                         | NUDT3   | 718568    |
| Nudix hydrolase 5                                         | NUDT5   | 694368    |
| Nudix hydrolase 6                                         | NUDT6   | 708421    |
| Nudix hydrolase 9                                         | NUDT9   | 701344    |
| Numb homolog (Drosophila)                                 | NUMB    | 696528    |
| NUS1 dehydrodolichyl diphosphate synthase subunit         | NUS1    | 715015    |
| O-6-methylguanine-DNA methyltransferase                   | MGMT    | 698134    |
| O-acyl-ADP-ribose deacylase 1                             | OARD1   | 719685    |
| Occludin/ELL domain containing 1                          | OCEL1   | 718921    |
| OCIA domain containing 1                                  | OCIAD1  | 706191    |
| OCIA domain containing 2                                  | OCIAD2  | 706300    |
| Oculocerebrorenal syndrome of Lowe                        | OCRL    | 702345    |
| Odd-skipped related transcription factor 1                | OSR1    | 106992848 |
| Odd-skipped related transcription factor 2                | OSR2    | 704253    |
| Olfactomedin 1                                            | OLFM1   | 712348    |
| Olfactomedin 2                                            | OLFM2   | 711336    |
| Olfactomedin like 2B                                      | OLFML2B | 720062    |
| Olfactomedin like 3                                       | OLFML3  | 707969    |
| Olfactory receptor, family 1, subfamily Q, member 1       | OR1Q1   | 697695    |
| Olfactory receptor, family 10, subfamily A, member 4      | OR10A4  | 100423176 |
| Olfactory receptor, family 2, subfamily AG, member 2      | OR2AG2  | 709556    |
| Olfactory receptor, family 2, subfamily W, member 1       | OR2W1   | 708515    |
| Olfactory receptor, family 4, subfamily E, member 2       | OR4E2   | 708887    |
| Olfactory receptor, family 4, subfamily N, member 2       | OR4N2   | 701881    |
| Olfactory receptor, family 9, subfamily I, member 1       | OR9I1   | 703649    |
| Oligonucleotide/oligosaccharide-binding fold containing 1 | OBFC1   | 714968    |
| Opa interacting protein 5                                 | OIP5    | 705837    |
| Opsin 3                                                   | OPN3    | 707436    |
| Optic atrophy 1 (autosomal dominant)                      | OPA1    | 698540    |
| ORAI calcium release-activated calcium modulator 1        | ORAI1   | 700190    |
| Oral-facial-digital syndrome 1                            | OFD1    | 711677    |
| Origin recognition complex subunit 1                      | ORC1    | 713271    |
| Origin recognition complex subunit 3                      | ORC3    | 700773    |
| Origin recognition complex subunit 5                      | ORC5    | 696683    |
| Origin recognition complex subunit 6                      | ORC6    | 716175    |
| ORMDL sphingolipid biosynthesis regulator 1               | ORMDL1  | 709832    |
| ORMDL sphingolipid biosynthesis regulator 2               | ORMDL2  | 710296    |
| ORMDL sphingolipid biosynthesis regulator 3               | ORMDL3  | 699154    |

|                                                                     |         |           |
|---------------------------------------------------------------------|---------|-----------|
| Ornithine aminotransferase                                          | OAT     | 693970    |
| Ornithine decarboxylase 1                                           | ODC1    | 695625    |
| Ornithine decarboxylase antizyme 1                                  | OAZ1    | 721477    |
| Osteosarcoma amplified 9, endoplasmic reticulum lectin              | OS9     | 715555    |
| OTU deubiquitinase with linear linkage specificity                  | OTULIN  | 698991    |
| OTU domain containing 6B                                            | OTUD6B  | 697015    |
| Outer dense fiber of sperm tails 1                                  | ODF1    | 707269    |
| Outer dense fiber of sperm tails 2                                  | ODF2    | 717505    |
| Ovo-like zinc finger 1                                              | OVOL1   | 715797    |
| Oxidation resistance 1                                              | OXR1    | 696398    |
| Oxidative stress responsive 1                                       | OXSR1   | 696362    |
| Oxoeicosanoid (OXE) receptor 1                                      | OXER1   | 713039    |
| Oxoglutarate (alpha-ketoglutarate) dehydrogenase (lipoamide)        | OGDH    | 698854    |
| Oxysterol binding protein                                           | OSBP    | 699325    |
| Oxysterol binding protein like 10                                   | OSBPL10 | 703555    |
| Oxysterol binding protein like 11                                   | OSBPL11 | 716096    |
| P21 protein (Cdc42/Rac)-activated kinase 1                          | PAK1    | 698585    |
| P21 protein (Cdc42/Rac)-activated kinase 2                          | PAK2    | 710314    |
| P450 (cytochrome) oxidoreductase                                    | POR     | 715888    |
| P53 and DNA damage regulated 1                                      | PDRG1   | 712622    |
| Paired box 2                                                        | PAX2    | 710687    |
| PAK1 interacting protein 1                                          | PAK1IP1 | 697856    |
| Palmitoyl-protein thioesterase 1                                    | PPT1    | 693377    |
| Pancreatic polypeptide                                              | PPY     | 713988    |
| Pancreatic progenitor cell differentiation and proliferation factor | PPDPF   | 719608    |
| Pantothenate kinase 1                                               | PANK1   | 696041    |
| Pantothenate kinase 2                                               | PANK2   | 717639    |
| Pantothenate kinase 4                                               | PANK4   | 694804    |
| PAP associated domain containing 4                                  | PAPD4   | 710044    |
| PAP associated domain containing 7                                  | PAPD7   | 713853    |
| Papillary renal cell carcinoma (translocation-associated)           | PRCC    | 718660    |
| Par-3 family cell polarity regulator                                | PARD3   | 706472    |
| Paralemmin 2                                                        | PALM2   | 100532752 |
| Paraneoplastic Ma antigen 1                                         | PNMA1   | 697618    |
| Paraneoplastic Ma antigen 3                                         | PNMA3   | 694406    |
| Paraoxonase 2                                                       | PON2    | 699107    |
| Paraoxonase 3                                                       | PON3    | 699236    |
| Paraspeckle component 1                                             | PSPC1   | 705080    |
| Parathyroid hormone 1 receptor                                      | PTH1R   | 712147    |
| Parkinson protein 7                                                 | PARK7   | 708377    |
| Partner and localizer of BRCA2                                      | PALB2   | 700843    |
| Partner of NOB1 homolog                                             | PNO1    | 100337568 |
| Paternally expressed 3                                              | PEG3    | 707825    |
| PAXIP1 associated glutamate-rich protein 1                          | PAGR1   | 706839    |
| PC-esterase domain containing 1A                                    | PCED1A  | 716956    |
| PCI domain containing 2                                             | PCID2   | 714247    |
| PDLIM1 interacting kinase 1 like                                    | PDIK1L  | 719774    |
| PDZ and LIM domain 1                                                | PDLIM1  | 702998    |

|                                                            |         |           |
|------------------------------------------------------------|---------|-----------|
| PDZ domain containing 1                                    | PDZK1   | 696698    |
| PDZ domain containing 4                                    | PDZD4   | 697387    |
| PDZ domain containing ring finger 3                        | PDZRN3  | 709901    |
| Pecanex homolog (Drosophila)                               | PCNX    | 694094    |
| Pecanex-like 4 (Drosophila)                                | PCNXL4  | 702758    |
| Pellino E3 ubiquitin protein ligase 1                      | PELI1   | 696416    |
| Peptidase (mitochondrial processing) alpha                 | PMPCA   | 721742    |
| Peptide deformylase (mitochondrial)                        | PDF     | 100427224 |
| Peptidoglycan recognition protein 3                        | PGLYRP3 | 714583    |
| Peptidylprolyl isomerase A (cyclophilin A)                 | PPIA    | 574102    |
| Peptidylprolyl isomerase B (cyclophilin B)                 | PPIB    | 706757    |
| Peptidylprolyl isomerase domain and WD repeat containing 1 | PPWD1   | 696267    |
| Peptidylprolyl isomerase E (cyclophilin E)                 | PPIE    | 716340    |
| Peptidylprolyl isomerase F                                 | PPIF    | 574137    |
| Peptidylprolyl isomerase G (cyclophilin G)                 | PPIG    | 706262    |
| Peptidylprolyl isomerase H (cyclophilin H)                 | PPIH    | 697669    |
| Peptidylprolyl isomerase like 3                            | PPIL3   | 700456    |
| Peptidylprolyl isomerase like 4                            | PPIL4   | 696634    |
| Peptidyl-trna hydrolase 1 homolog                          | PTRH1   | 700335    |
| Periaxin                                                   | PRX     | 702329    |
| Period circadian clock 1                                   | PER1    | 721948    |
| Periostin, osteoblast specific factor                      | POSTN   | 695528    |
| Peripheral myelin protein 22                               | PMP22   | 693527    |
| Peroxiredoxin 2                                            | PRDX2   | 716665    |
| Peroxiredoxin 3                                            | PRDX3   | 702882    |
| Peroxiredoxin 4                                            | PRDX4   | 697635    |
| Peroxiredoxin 6                                            | PRDX6   | 706486    |
| Peroxisomal biogenesis factor 11 beta                      | PEX11B  | 698184    |
| Peroxisomal biogenesis factor 11 gamma                     | PEX11G  | 703198    |
| Peroxisomal biogenesis factor 13                           | PEX13   | 717886    |
| Peroxisomal biogenesis factor 16                           | PEX16   | 714904    |
| Peroxisomal biogenesis factor 6                            | PEX6    | 697597    |
| Peroxisomal membrane protein 2                             | PXMP2   | 693648    |
| Peroxisome proliferator-activated receptor delta           | PPARD   | 718861    |
| PEST proteolytic signal containing nuclear protein         | PCNP    | 702162    |
| PH domain and leucine rich repeat protein phosphatase 1    | PHLPP1  | 705882    |
| PHD finger protein 1                                       | PHF1    | 718337    |
| PHD finger protein 19                                      | PHF19   | 704050    |
| PHD finger protein 2                                       | PHF2    | 717585    |
| PHD finger protein 21A                                     | PHF21A  | 714798    |
| PHD finger protein 23                                      | PHF23   | 714538    |
| PHD finger protein 6                                       | PHF6    | 707390    |
| PHD finger protein 7                                       | PHF7    | 697103    |
| Phenylalanine hydroxylase                                  | PAH     | 698696    |
| Phenylalanyl-trna synthetase 2, mitochondrial              | FARS2   | 710945    |
| Phenylalanyl-trna synthetase alpha subunit                 | FARSA   | 716878    |
| Phenylethanolamine N-methyltransferase                     | PNMT    | 697444    |
| Phosphatase and actin regulator 1                          | PHACTR1 | 700226    |



|                                                                        |          |           |
|------------------------------------------------------------------------|----------|-----------|
| Phosphatase and tensin homolog                                         | PTEN     | 705121    |
| Phosphatase, orphan 1                                                  | PHOSPHO1 | 698959    |
| Phosphatase, orphan 2                                                  | PHOSPHO2 | 100429656 |
| Phosphate cytidyltransferase 1, choline, alpha                         | PCYT1A   | 722105    |
| Phosphatidylethanolamine binding protein 1                             | PEBP1    | 694697    |
| Phosphatidylethanolamine N-methyltransferase                           | PEMT     | 699083    |
| Phosphatidylglycerophosphate synthase 1                                | PGS1     | 710125    |
| Phosphatidylinositol 3-kinase catalytic subunit type 3                 | PIK3C3   | 693918    |
| Phosphatidylinositol 4-kinase, catalytic, alpha                        | PI4KA    | 698020    |
| Phosphatidylinositol 4-kinase, catalytic, beta                         | PI4KB    | 710104    |
| Phosphatidylinositol binding clathrin assembly protein                 | PICALM   | 706003    |
| Phosphatidylinositol glycan anchor biosynthesis class A                | PIGA     | 712514    |
| Phosphatidylinositol glycan anchor biosynthesis class C                | PIGC     | 705657    |
| Phosphatidylinositol glycan anchor biosynthesis class F                | PIGF     | 714844    |
| Phosphatidylinositol glycan anchor biosynthesis class G                | PIGG     | 714088    |
| Phosphatidylinositol glycan anchor biosynthesis class H                | PIGH     | 710780    |
| Phosphatidylinositol glycan anchor biosynthesis class O                | PIGO     | 698588    |
| Phosphatidylinositol glycan anchor biosynthesis class S                | PIGS     | 709115    |
| Phosphatidylinositol glycan anchor biosynthesis class U                | PIGU     | 707317    |
| Phosphatidylinositol glycan anchor biosynthesis class V                | PIGV     | 714898    |
| Phosphatidylinositol transfer protein beta                             | PITPNB   | 713414    |
| Phosphatidylinositol-4,5-bisphosphate 3-kinase catalytic subunit alpha | PIK3CA   | 709959    |
| Phosphatidylinositol-4,5-bisphosphate 3-kinase catalytic subunit beta  | PIK3CB   | 716098    |
| Phosphatidylserine synthase 1                                          | PTDSS1   | 701486    |
| Phosphodiesterase 12                                                   | PDE12    | 703552    |
| Phosphodiesterase 4B                                                   | PDE4B    | 699309    |
| Phosphodiesterase 6A                                                   | PDE6A    | 677688    |
| Phosphodiesterase 6D                                                   | PDE6D    | 712629    |
| Phosphodiesterase 8A                                                   | PDE8A    | 694750    |
| Phosphodiesterase 9A                                                   | PDE9A    | 100301992 |
| Phosphoenolpyruvate carboxykinase 2 (mitochondrial)                    | PCK2     | 714922    |
| Phosphoglucomutase 1                                                   | PGM1     | 699401    |
| Phosphoglucomutase 3                                                   | PGM3     | 694464    |
| Phosphoglycerate kinase 1                                              | PGK1     | 706325    |
| Phosphohistidine phosphatase 1                                         | PHPT1    | 721674    |
| Phosphoinositide-3-kinase interacting protein 1                        | PIK3IP1  | 716694    |
| Phosphoinositide-3-kinase regulatory subunit 4                         | PIK3R4   | 718012    |
| Phospholipase A2 group VI                                              | PLA2G6   | 700184    |
| Phospholipase A2 group XIIB                                            | PLA2G12B | 708031    |
| Phospholipase A2 group XV                                              | PLA2G15  | 702619    |
| Phospholipase A2 group XVI                                             | PLA2G16  | 722178    |
| Phospholipase A2, group IVB (cytosolic)                                | PLA2G4B  | 100533112 |
| Phospholipase B domain containing 1                                    | PLBD1    | 698939    |
| Phospholipase B domain containing 2                                    | PLBD2    | 714669    |
| Phospholipase C delta 1                                                | PLCD1    | 696860    |
| Phospholipase D family member 3                                        | PLD3     | 701083    |
| Phospholipid phosphatase 1                                             | PLPP1    | 706539    |
| Phospholipid phosphatase 2                                             | PLPP2    | 721004    |

|                                                                                                                                |          |        |
|--------------------------------------------------------------------------------------------------------------------------------|----------|--------|
| Phospholipid phosphatase 6                                                                                                     | PLPP6    | 695188 |
| Phospholipid phosphatase 7 (inactive)                                                                                          | PLPP7    | 722411 |
| Phospholipid scramblase 3                                                                                                      | PLSCR3   | 721831 |
| Phosphopantothenoylcysteine synthetase                                                                                         | PPCS     | 697064 |
| Phosphoribosyl pyrophosphate synthetase 1                                                                                      | PRPS1    | 702529 |
| Phosphoribosyl pyrophosphate synthetase 1-like 1                                                                               | PRPS1L1  | 708413 |
| Phosphoribosyl pyrophosphate synthetase-associated protein 1                                                                   | PRPSAP1  | 706625 |
| Phosphoribosyl transferase domain containing 1                                                                                 | PRTFDC1  | 712819 |
| Phosphoribosylglycinamide formyltransferase, phosphoribosyl<br>glycinamide synthetase, phosphoribosylaminoimidazole synthetase | GART     | 704926 |
| Phosphorylase kinase, alpha 2 (liver)                                                                                          | PHKA2    | 694376 |
| Phosphorylase kinase, beta                                                                                                     | PHKB     | 716390 |
| Phosphorylase, glycogen, liver                                                                                                 | PYGL     | 706853 |
| Phytanoyl-coa 2-hydroxylase                                                                                                    | PHYH     | 695915 |
| Phytanoyl-coa dioxygenase domain containing 1                                                                                  | PHYHD1   | 717104 |
| Piggybac transposable element derived 2                                                                                        | PGBD2    | 709925 |
| PIGY upstream reading frame                                                                                                    | PYURF    | 702862 |
| PIH1 domain containing 1                                                                                                       | PIH1D1   | 718787 |
| PIH1 domain containing 2                                                                                                       | PIH1D2   | 711087 |
| PILR alpha associated neural protein                                                                                           | PIANP    | 713548 |
| PIN2/TERF1 interacting, telomerase inhibitor 1                                                                                 | PINX1    | 701523 |
| Pinin, desmosome associated protein                                                                                            | PNN      | 700296 |
| PITH (C-terminal proteasome-interacting domain of thioredoxin-like)<br>domain containing 1                                     | PITHD1   | 710737 |
| Pituitary tumor-transforming 1                                                                                                 | PTTG1    | 696143 |
| Pituitary tumor-transforming 1 interacting protein                                                                             | PTTG1IP  | 722061 |
| Placenta specific 9                                                                                                            | PLAC9    | 700881 |
| Plasminogen activator, tissue                                                                                                  | PLAT     | 704475 |
| Plasminogen receptor, C-terminal lysine transmembrane protein                                                                  | PLGRKT   | 693286 |
| Plastin 1                                                                                                                      | PLS1     | 714391 |
| Plastin 3                                                                                                                      | PLS3     | 709055 |
| Platelet activating factor acetylhydrolase 1b catalytic subunit 2                                                              | PAFAH1B2 | 703013 |
| Platelet activating factor acetylhydrolase 1b catalytic subunit 3                                                              | PAFAH1B3 | 707570 |
| Platelet activating factor acetylhydrolase 1b regulatory subunit 1                                                             | PAFAH1B1 | 574255 |
| Platelet derived growth factor C                                                                                               | PDGFC    | 700236 |
| Platelet derived growth factor D                                                                                               | PDGFD    | 704310 |
| Platelet-derived growth factor beta polypeptide                                                                                | PDGFB    | 703173 |
| Platelet-derived growth factor receptor-like                                                                                   | PDGFRL   | 703117 |
| Pleckstrin and Sec7 domain containing                                                                                          | PSD      | 714737 |
| Pleckstrin and Sec7 domain containing 2                                                                                        | PSD2     | 694873 |
| Pleckstrin homology and FYVE domain containing 1                                                                               | PLEKHF1  | 700343 |
| Pleckstrin homology and FYVE domain containing 2                                                                               | PLEKHF2  | 701884 |
| Pleckstrin homology and rhogef domain containing G2                                                                            | PLEKHG2  | 698408 |
| Pleckstrin homology domain containing A1                                                                                       | PLEKHA1  | 705731 |
| Pleckstrin homology domain containing A3                                                                                       | PLEKHA3  | 703417 |
| Pleckstrin homology domain containing A7                                                                                       | PLEKHA7  | 697646 |
| Pleckstrin homology domain containing A8                                                                                       | PLEKHA8  | 696127 |
| Pleckstrin homology domain containing J1                                                                                       | PLEKHJ1  | 710129 |

|                                                              |         |           |
|--------------------------------------------------------------|---------|-----------|
| Pleckstrin homology domain containing O1                     | PLEKHO1 | 706145    |
| Pleckstrin homology domain containing O2                     | PLEKHO2 | 712677    |
| Pleckstrin homology domain interacting protein               | PHIP    | 716810    |
| Pleckstrin homology, myth4 and FERM domain containing H3     | PLEKHH3 | 711013    |
| Pleckstrin homology-like domain, family A, member 3          | PHLDA3  | 709782    |
| Pleiotrophin                                                 | PTN     | 709496    |
| Plexin domain containing 2                                   | PLXDC2  | 702523    |
| PNN-interacting serine/arginine-rich protein                 | PNISR   | 694075    |
| POC1 centriolar protein A                                    | POC1A   | 698157    |
| Pogo transposable element with KRAB domain                   | POGK    | 696834    |
| Pogo transposable element with ZNF domain                    | POGZ    | 710634    |
| Poliovirus receptor-related 2 (herpesvirus entry mediator B) | PVRL2   | 713229    |
| Polo-like kinase 1                                           | PLK1    | 697686    |
| Polo-like kinase 3                                           | PLK3    | 704071    |
| Polo-like kinase 4                                           | PLK4    | 710233    |
| Poly(A) binding protein interacting protein 1                | PAIP1   | 700869    |
| Poly(A) binding protein interacting protein 2                | PAIP2   | 693317    |
| Poly(A) binding protein, cytoplasmic 1                       | PABPC1  | 705847    |
| Poly(A) binding protein, cytoplasmic 3                       | PABPC3  | 708617    |
| Poly(A) binding protein, cytoplasmic 4 (inducible form)      | PABPC4  | 716083    |
| Poly(A) polymerase alpha                                     | PAPOLA  | 641447    |
| Poly(A)-specific ribonuclease                                | PARN    | 712984    |
| Poly(ADP-ribose) glycohydrolase                              | PARG    | 709432    |
| Poly(ADP-ribose) polymerase 1                                | PARP1   | 698806    |
| Poly(ADP-ribose) polymerase 2                                | PARP2   | 701955    |
| Poly(ADP-ribose) polymerase family member 10                 | PARP10  | 708132    |
| Poly(ADP-ribose) polymerase family member 16                 | PARP16  | 709140    |
| Poly(rc) binding protein 2                                   | PCBP2   | 703175    |
| Poly(rc) binding protein 4                                   | PCBP4   | 699225    |
| Polybromo 1                                                  | PBRM1   | 696361    |
| Polycomb group ring finger 2                                 | PCGF2   | 694187    |
| Polycomb group ring finger 3                                 | PCGF3   | 697151    |
| Polycomb group ring finger 6                                 | PCGF6   | 714508    |
| Polyglutamine binding protein 1                              | PQBP1   | 711678    |
| Polyhomeotic homolog 2 (Drosophila)                          | PHC2    | 710201    |
| Polymerase (DNA directed), alpha 2, accessory subunit        | POLA2   | 716541    |
| Polymerase (DNA directed), beta                              | POLB    | 704801    |
| Polymerase (DNA directed), epsilon 3, accessory subunit      | POLE3   | 705074    |
| Polymerase (DNA directed), gamma                             | POLG    | 699750    |
| Polymerase (RNA) I polypeptide C                             | POLR1C  | 700727    |
| Polymerase (RNA) II (DNA directed) polypeptide C, 33kda      | POLR2C  | 704555    |
| Polymerase (RNA) II (DNA directed) polypeptide F             | POLR2F  | 699566    |
| Polymerase (RNA) II (DNA directed) polypeptide G             | POLR2G  | 718548    |
| Polymerase (RNA) II (DNA directed) polypeptide H             | POLR2H  | 100429040 |
| Polymerase (RNA) II (DNA directed) polypeptide I, 14.5kda    | POLR2I  | 712412    |
| Polymerase (RNA) III (DNA directed) polypeptide B            | POLR3B  | 702711    |
| Polymerase (RNA) III (DNA directed) polypeptide C (62kd)     | POLR3C  | 696943    |
| Polymerase (RNA) III (DNA directed) polypeptide D, 44kda     | POLR3D  | 707923    |

|                                                                                                 |         |           |
|-------------------------------------------------------------------------------------------------|---------|-----------|
| Polymerase (RNA) III (DNA directed) polypeptide E (80kd)                                        | POLR3E  | 697901    |
| Polymerase (RNA) III (DNA directed) polypeptide F, 39 kda                                       | POLR3F  | 697927    |
| Polymerase (RNA) III (DNA directed) polypeptide G (32kd)-like                                   | POLR3GL | 698563    |
| Polymerase (RNA) III (DNA directed) polypeptide H (22.9kd)                                      | POLR3H  | 707546    |
| Polymerase (RNA) mitochondrial (DNA directed)                                                   | POLRMT  | 100426184 |
| Polynucleotide kinase 3'-phosphatase                                                            | PNKP    | 719084    |
| Polypeptide N-acetylgalactosaminyltransferase 1                                                 | GALNT1  | 708930    |
| Polypeptide N-acetylgalactosaminyltransferase 12                                                | GALNT12 | 715128    |
| Polypyrimidine tract binding protein 2                                                          | PTBP2   | 710101    |
| Polysaccharide biosynthesis domain containing 1                                                 | PBDC1   | 705125    |
| POP4 homolog, ribonuclease P/MRP subunit                                                        | POP4    | 700209    |
| POP5 homolog, ribonuclease P/MRP subunit                                                        | POP5    | 697559    |
| POP7 homolog, ribonuclease P/MRP subunit                                                        | POP7    | 712859    |
| Post-GPI attachment to proteins 2                                                               | PGAP2   | 718085    |
| Post-GPI attachment to proteins 3                                                               | PGAP3   | 697699    |
| Potassium channel modulatory factor 1                                                           | KCMF1   | 694645    |
| Potassium channel subfamily M regulatory beta subunit 4                                         | KCNMB4  | 717360    |
| Potassium channel tetramerization domain containing 10                                          | KCTD10  | 707443    |
| Potassium channel tetramerization domain containing 18                                          | KCTD18  | 699824    |
| Potassium channel tetramerization domain containing 2                                           | KCTD2   | 700474    |
| Potassium channel tetramerization domain containing 3                                           | KCTD3   | 708471    |
| Potassium channel tetramerization domain containing 5                                           | KCTD5   | 698663    |
| Potassium channel tetramerization domain containing 6                                           | KCTD6   | 701810    |
| Potassium channel tetramerization domain containing 9                                           | KCTD9   | 711515    |
| Potassium channel, calcium activated intermediate/small conductance subfamily N alpha, member 1 | KCNN1   | 720091    |
| Potassium channel, inwardly rectifying subfamily J, member 12                                   | KCNJ12  | 705326    |
| Potassium channel, voltage gated eag related subfamily H, member 3                              | KCNH3   | 710838    |
| Potassium channel, voltage gated Shab related subfamily B, member 1                             | KCNB1   | 703520    |
| Potassium channel, voltage gated Shal related subfamily D, member 1                             | KCND1   | 711997    |
| Potassium channel, voltage gated Shaw related subfamily C, member 2                             | KCNC2   | 100430904 |
| Potassium voltage-gated channel, Isk-related family, member 4                                   | KCNE4   | 706263    |
| Potassium voltage-gated channel, modifier subfamily S, member 1                                 | KCNS1   | 711715    |
| POU class 2 homeobox 1                                                                          | POU2F1  | 700530    |
| PQ loop repeat containing 1                                                                     | PQLC1   | 698716    |
| PQ loop repeat containing 3                                                                     | PQLC3   | 696961    |
| PR domain containing 14                                                                         | PRDM14  | 693324    |
| PR domain containing 2, with ZNF domain                                                         | PRDM2   | 716295    |
| PR domain containing 4                                                                          | PRDM4   | 704529    |
| PR domain containing 5                                                                          | PRDM5   | 708790    |
| PRA1 domain family member 2                                                                     | PRAF2   | 712436    |
| Praja ring finger 1, E3 ubiquitin protein ligase                                                | PJA1    | 695038    |
| Pre-B-cell leukemia homeobox 1                                                                  | PBX1    | 694416    |
| Pre-B-cell leukemia homeobox 2                                                                  | PBX2    | 716239    |
| Pre-B-cell leukemia homeobox 4                                                                  | PBX4    | 106994672 |
| Prefoldin subunit 2                                                                             | PFDN2   | 719886    |
| Prefoldin subunit 5                                                                             | PFDN5   | 702355    |
| PRELI domain containing 1                                                                       | PRELID1 | 699254    |

|                                                                     |          |           |
|---------------------------------------------------------------------|----------|-----------|
| Premelanosome protein                                               | PMEL     | 710921    |
| Pre-mrna processing factor 3                                        | PRPF3    | 706898    |
| Pre-mrna processing factor 31                                       | PRPF31   | 720567    |
| Pre-mrna processing factor 40 homolog A                             | PRPF40A  | 696668    |
| Prenyl (decaprenyl) diphosphate synthase, subunit 1                 | PDSS1    | 707598    |
| Prepronociceptin                                                    | PNOC     | 713633    |
| Presenilin 1                                                        | PSEN1    | 696274    |
| Presenilin enhancer gamma secretase subunit                         | PSENEN   | 100429008 |
| Presequence translocase-associated motor 16 homolog (S. Cerevisiae) | PAM16    | 704987    |
| Prickle homolog 1                                                   | PRICKLE1 | 701864    |
| Prion protein                                                       | PRNP     | 717859    |
| Procollagen-lysine, 2-oxoglutarate 5-dioxygenase 1                  | PLOD1    | 722763    |
| Progesterone receptor                                               | PGR      | 613024    |
| Progesterone receptor membrane component 1                          | PGRMC1   | 711792    |
| Progestin and adipoq receptor family member III                     | PAQR3    | 697120    |
| Progestin and adipoq receptor family member IV                      | PAQR4    | 699484    |
| Programmed cell death 2                                             | PDCD2    | 696380    |
| Programmed cell death 2-like                                        | PDCD2L   | 705688    |
| Programmed cell death 4 (neoplastic transformation inhibitor)       | PDCD4    | 695345    |
| Programmed cell death 6                                             | PDCD6    | 723043    |
| Programmed cell death 7                                             | PDCD7    | 708758    |
| Prohibitin                                                          | PHB      | 699334    |
| Prohibitin 2                                                        | PHB2     | 714693    |
| Prolactin regulatory element binding                                | PREB     | 700408    |
| Proliferating cell nuclear antigen                                  | PCNA     | 718006    |
| Proline and serine rich 2                                           | PROSER2  | 693705    |
| Proline rich 15                                                     | PRR15    | 696869    |
| Proline rich 15-like                                                | PRR15L   | 695068    |
| Proline rich 3                                                      | PRR3     | 711699    |
| Proline rich 7 (synaptic)                                           | PRR7     | 700123    |
| Proline rich Gla (G-carboxyglutamic acid) 1                         | PRRG1    | 696938    |
| Proline rich membrane anchor 1                                      | PRIMA1   | 100426272 |
| Proline rich nuclear receptor coactivator 2                         | PNRC2    | 719213    |
| Proline/serine-rich coiled-coil 1                                   | PSRC1    | 698060    |
| Proline-rich coiled-coil 1                                          | PRRC1    | 704248    |
| Proline-rich coiled-coil 2A                                         | PRRC2A   | 715715    |
| Proline-rich coiled-coil 2C                                         | PRRC2C   | 704297    |
| Prolyl 4-hydroxylase, alpha polypeptide II                          | P4HA2    | 707157    |
| Prolyl 4-hydroxylase, transmembrane (endoplasmic reticulum)         | P4HTM    | 708158    |
| Prolyl endopeptidase                                                | PREP     | 696633    |
| Prolyl endopeptidase-like                                           | PREPL    | 713980    |
| Prolylcarboxypeptidase                                              | PRCP     | 701305    |
| Prominin 1                                                          | PROM1    | 714610    |
| Promyelocytic leukemia                                              | PML      | 700379    |
| Propionyl-coa carboxylase alpha subunit                             | PCCA     | 699844    |
| Propionyl-coa carboxylase beta subunit                              | PCCB     | 716964    |
| Proprotein convertase subtilisin/kexin type 4                       | PCSK4    | 707567    |
| Prostaglandin D2 receptor 2                                         | PTGDR2   | 695853    |

|                                                             |        |           |
|-------------------------------------------------------------|--------|-----------|
| Prostaglandin D2 synthase                                   | PTGDS  | 707990    |
| Prostaglandin E synthase 3                                  | PTGES3 | 713353    |
| Prostaglandin F2 receptor inhibitor                         | PTGFRN | 713889    |
| Protease, serine 27                                         | PRSS27 | 697848    |
| Protease, serine 55                                         | PRSS55 | 698379    |
| Proteasomal ATPase associated factor 1                      | PAAF1  | 718755    |
| Proteasome (prosome, macropain) assembly chaperone 1        | PSMG1  | 715758    |
| Proteasome (prosome, macropain) assembly chaperone 2        | PSMG2  | 717110    |
| Proteasome (prosome, macropain) assembly chaperone 3        | PSMG3  | 697590    |
| Proteasome 26S subunit, ATPase 3                            | PSMC3  | 713356    |
| Proteasome 26S subunit, ATPase 4                            | PSMC4  | 699847    |
| Proteasome 26S subunit, non-ATPase 1                        | PSMD1  | 711724    |
| Proteasome 26S subunit, non-ATPase 10                       | PSMD10 | 703596    |
| Proteasome 26S subunit, non-ATPase 12                       | PSMD12 | 718756    |
| Proteasome 26S subunit, non-ATPase 14                       | PSMD14 | 701063    |
| Proteasome 26S subunit, non-ATPase 4                        | PSMD4  | 100192392 |
| Proteasome 26S subunit, non-ATPase 6                        | PSMD6  | 698601    |
| Proteasome 26S subunit, non-ATPase 7                        | PSMD7  | 705581    |
| Proteasome activator subunit 1                              | PSME1  | 714364    |
| Proteasome activator subunit 2                              | PSME2  | 715288    |
| Proteasome subunit alpha 1                                  | PSMA1  | 701029    |
| Proteasome subunit alpha 2                                  | PSMA2  | 701683    |
| Proteasome subunit alpha 3                                  | PSMA3  | 700251    |
| Proteasome subunit alpha 4                                  | PSMA4  | 710417    |
| Proteasome subunit alpha 5                                  | PSMA5  | 698435    |
| Proteasome subunit alpha 6                                  | PSMA6  | 695113    |
| Proteasome subunit beta 1                                   | PSMB1  | 696133    |
| Proteasome subunit beta 10                                  | PSMB10 | 701088    |
| Proteasome subunit beta 2                                   | PSMB2  | 712193    |
| Proteasome subunit beta 3                                   | PSMB3  | 694318    |
| Proteasome subunit beta 4                                   | PSMB4  | 710734    |
| Proteasome subunit beta 6                                   | PSMB6  | 710028    |
| Proteasome subunit beta 7                                   | PSMB7  | 694567    |
| Proteasome subunit beta 9                                   | PSMB9  | 716980    |
| Protection of telomeres 1                                   | POT1   | 696751    |
| Protein arginine methyltransferase 2                        | PRMT2  | 708006    |
| Protein arginine methyltransferase 5                        | PRMT5  | 712718    |
| Protein associated with topoisomerase II homolog 1 (yeast)  | PATL1  | 699207    |
| Protein C receptor                                          | PROCR  | 706040    |
| Protein disulfide isomerase family A member 5               | PDIA5  | 715226    |
| Protein disulfide isomerase family A member 6               | PDIA6  | 706781    |
| Protein disulfide isomerase-like, testis expressed          | PDILT  | 696000    |
| Protein inhibitor of activated STAT 1                       | PIAS1  | 693445    |
| Protein inhibitor of activated STAT 2                       | PIAS2  | 696737    |
| Protein inhibitor of activated STAT 3                       | PIAS3  | 706775    |
| Protein interacting with PRKCA 1                            | PICK1  | 699815    |
| Protein kinase (camp-dependent, catalytic) inhibitor gamma  | PKIG   | 712474    |
| Protein kinase, AMP-activated, beta 1 non-catalytic subunit | PRKAB1 | 695737    |

|                                                                                                     |          |        |
|-----------------------------------------------------------------------------------------------------|----------|--------|
| Protein kinase, camp-dependent, regulatory subunit type II beta                                     | PRKAR2B  | 700770 |
| Protein kinase, interferon-inducible double stranded RNA dependent activator                        | PRKRA    | 703063 |
| Protein O-glucosyltransferase 1                                                                     | POGLUT1  | 712357 |
| Protein O-linked mannose N-acetylglucosaminyltransferase 1 (beta 1,2-)                              | POMGNT1  | 707205 |
| Protein phosphatase 1 regulatory subunit 12C                                                        | PPP1R12C | 698538 |
| Protein phosphatase 1 regulatory subunit 13B                                                        | PPP1R13B | 700432 |
| Protein phosphatase 1 regulatory subunit 15A                                                        | PPP1R15A | 718350 |
| Protein phosphatase 1 regulatory subunit 16A                                                        | PPP1R16A | 702995 |
| Protein phosphatase 1 regulatory subunit 21                                                         | PPP1R21  | 715917 |
| Protein phosphatase 1 regulatory subunit 35                                                         | PPP1R35  | 712067 |
| Protein phosphatase 1 regulatory subunit 7                                                          | PPP1R7   | 700574 |
| Protein phosphatase 1, catalytic subunit, gamma isozyme                                             | PPP1CC   | 709935 |
| Protein phosphatase 2 regulatory subunit A, alpha                                                   | PPP2R1A  | 719929 |
| Protein phosphatase 2 regulatory subunit A, beta                                                    | PPP2R1B  | 710387 |
| Protein phosphatase 2 regulatory subunit B', gamma                                                  | PPP2R5C  | 718894 |
| Protein phosphatase 2 regulatory subunit B'', gamma                                                 | PPP2R3C  | 694616 |
| Protein phosphatase 2, catalytic subunit, beta isozyme                                              | PPP2CB   | 695118 |
| Protein phosphatase 3, catalytic subunit, beta isozyme                                              | PPP3CB   | 706955 |
| Protein phosphatase 3, catalytic subunit, gamma isozyme                                             | PPP3CC   | 708233 |
| Protein phosphatase 4 catalytic subunit                                                             | PPP4C    | 708510 |
| Protein phosphatase 4 regulatory subunit 3B                                                         | PPP4R3B  | 718961 |
| Protein phosphatase 4, regulatory subunit 1                                                         | PPP4R1   | 705451 |
| Protein phosphatase 5, catalytic subunit                                                            | PPP5C    | 716214 |
| Protein phosphatase methylesterase 1                                                                | PPME1    | 718858 |
| Protein phosphatase, Mg <sup>2+</sup> /Mn <sup>2+</sup> dependent 1A                                | PPM1A    | 702987 |
| Protein phosphatase, Mg <sup>2+</sup> /Mn <sup>2+</sup> dependent 1F                                | PPM1F    | 698441 |
| Protein phosphatase, Mg <sup>2+</sup> /Mn <sup>2+</sup> dependent 1G                                | PPM1G    | 700695 |
| Protein phosphatase, Mg <sup>2+</sup> /Mn <sup>2+</sup> dependent 1K                                | PPM1K    | 702398 |
| Protein phosphatase, Mg <sup>2+</sup> /Mn <sup>2+</sup> dependent 1M                                | PPM1M    | 697788 |
| Protein S (alpha)                                                                                   | PROS1    | 694845 |
| Protein serine kinase H2                                                                            | PSKH2    | 693701 |
| Protein tyrosine phosphatase domain containing 1                                                    | PTPDC1   | 707878 |
| Protein tyrosine phosphatase type IVA, member 2                                                     | PTP4A2   | 706489 |
| Protein tyrosine phosphatase, mitochondrial 1                                                       | PTPMT1   | 713104 |
| Protein tyrosine phosphatase, non-receptor type 1                                                   | PTPN1    | 702016 |
| Protein tyrosine phosphatase, non-receptor type 12                                                  | PTPN12   | 721538 |
| Protein tyrosine phosphatase, non-receptor type 13 (APO-1/CD95 (Fas)-associated phosphatase)        | PTPN13   | 699866 |
| Protein tyrosine phosphatase, non-receptor type 23                                                  | PTPN23   | 711601 |
| Protein tyrosine phosphatase, receptor type, D                                                      | PTPRD    | 714954 |
| Protein-L-isoaspartate (D-aspartate) O-methyltransferase                                            | PCMT1    | 695893 |
| Proteolipid protein 2 (colonic epithelium-enriched)                                                 | PLP2     | 712869 |
| Protocadherin alpha 5                                                                               | PCDHA5   | 692083 |
| Protoporphyrinogen oxidase                                                                          | PPOX     | 719910 |
| Pseudouridylate synthase 3                                                                          | PUS3     | 713746 |
| Pterin-4 alpha-carbinolamine dehydratase/dimerization cofactor of hepatocyte nuclear factor 1 alpha | PCBD1    | 709875 |

|                                                        |          |           |
|--------------------------------------------------------|----------|-----------|
| Pumilio RNA binding family member 1                    | PUM1     | 704848    |
| Pumilio RNA binding family member 2                    | PUM2     | 701782    |
| Purinergic receptor P2Y, G-protein coupled, 11         | P2RY11   | 100533472 |
| Putative homeodomain transcription factor 1            | PHTF1    | 707208    |
| Putative homeodomain transcription factor 2            | PHTF2    | 693552    |
| PWP2 periodic tryptophan protein homolog (yeast)       | PWP2     | 722216    |
| PYM homolog 1, exon junction complex associated factor | PYM1     | 708148    |
| Pyridine nucleotide-disulphide oxidoreductase domain 2 | PYROXD2  | 707797    |
| Pyrroline-5-carboxylate reductase 1                    | PYCR1    | 715182    |
| Pyrroline-5-carboxylate reductase family member 2      | PYCR2    | 699808    |
| Pyruvate dehydrogenase (lipoamide) alpha 1             | PDHA1    | 100423992 |
| Pyruvate dehydrogenase (lipoamide) beta                | PDHB     | 574227    |
| Pyruvate dehydrogenase phosphatase regulatory subunit  | PDPR     | 709861    |
| R3H domain and coiled-coil containing 1 like           | R3HCC1L  | 707600    |
| Rab acceptor 1 (prenylated)                            | RABAC1   | 706397    |
| Rab geranylgeranyltransferase, beta subunit            | RABGGTB  | 705421    |
| Rab interacting lysosomal protein-like 2               | RILPL2   | 704853    |
| RAB, member of RAS oncogene family-like 2B             | RABL2B   | 716615    |
| RAB, member of RAS oncogene family-like 3              | RABL3    | 713621    |
| RAB11A, member RAS oncogene family                     | RAB11A   | 714144    |
| RAB14, member RAS oncogene family                      | RAB14    | 699837    |
| RAB1B, member RAS oncogene family                      | RAB1B    | 721852    |
| RAB20, member RAS oncogene family                      | RAB20    | 694578    |
| RAB23, member RAS oncogene family                      | RAB23    | 712860    |
| RAB25, member RAS oncogene family                      | RAB25    | 718131    |
| RAB28, member RAS oncogene family                      | RAB28    | 713566    |
| RAB2A, member RAS oncogene family                      | RAB2A    | 699383    |
| RAB3 gtpase activating non-catalytic protein subunit 2 | RAB3GAP2 | 706252    |
| RAB30, member RAS oncogene family                      | RAB30    | 701550    |
| RAB32, member RAS oncogene family                      | RAB32    | 702431    |
| RAB37, member RAS oncogene family                      | RAB37    | 698842    |
| RAB3A interacting protein                              | RAB3IP   | 717215    |
| RAB4A, member RAS oncogene family                      | RAB4A    | 694288    |
| RAB5B, member RAS oncogene family                      | RAB5B    | 708347    |
| RAB5C, member RAS oncogene family                      | RAB5C    | 709308    |
| RAB6A, member RAS oncogene family                      | RAB6A    | 718717    |
| RAB8B, member RAS oncogene family                      | RAB8B    | 705597    |
| RAB9A, member RAS oncogene family                      | RAB9A    | 720906    |
| Rabphilin 3A-like (without C2 domains)                 | RPH3AL   | 106993856 |
| Rac gtpase activating protein 1                        | RACGAP1  | 711887    |
| RAD1 checkpoint DNA exonuclease                        | RAD1     | 698993    |
| RAD17 checkpoint clamp loader component                | RAD17    | 700116    |
| RAD21 cohesin complex component                        | RAD21    | 700633    |
| RAD50 interactor 1                                     | RINT1    | 698414    |
| RAD51 associated protein 1                             | RAD51AP1 | 710918    |
| RAD51 paralog C                                        | RAD51C   | 714828    |
| RAD52 motif containing 1                               | RDM1     | 716624    |
| RAD9 checkpoint clamp component A                      | RAD9A    | 712345    |



|                                                                                         |          |           |
|-----------------------------------------------------------------------------------------|----------|-----------|
| RAD9-HUS1-RAD1 interacting nuclear orphan 1                                             | RHNO1    | 709008    |
| Radial spoke 3 homolog (Chlamydomonas)                                                  | RSPH3    | 704059    |
| Radial spoke head 1 homolog (Chlamydomonas)                                             | RSPH1    | 714394    |
| Radical S-adenosyl methionine domain containing 1                                       | RSAD1    | 705626    |
| Radixin                                                                                 | RDX      | 709018    |
| Raf-1 proto-oncogene, serine/threonine kinase                                           | RAF1     | 694725    |
| Raftlin family member 2                                                                 | RFTN2    | 697562    |
| Raftlin, lipid raft linker 1                                                            | RFTN1    | 695142    |
| Ral GEF with PH domain and SH3 binding motif 1                                          | RALGPS1  | 708253    |
| Ral gtpase activating protein, alpha subunit 1 (catalytic)                              | RALGAPA1 | 695674    |
| Ral gtpase activating protein, beta subunit (non-catalytic)                             | RALGAPB  | 705742    |
| Ral guanine nucleotide dissociation stimulator-like 1                                   | RGL1     | 717554    |
| RALBP1 associated Eps domain containing 2                                               | REPS2    | 721024    |
| RALY heterogeneous nuclear ribonucleoprotein                                            | RALY     | 713317    |
| RAN binding protein 1                                                                   | RANBP1   | 719448    |
| RAN binding protein 10                                                                  | RANBP10  | 700911    |
| RAN binding protein 17                                                                  | RANBP17  | 701214    |
| RAN binding protein 2                                                                   | RANBP2   | 694823    |
| Ran gtpase activating protein 1                                                         | RANGAP1  | 710698    |
| RAN guanine nucleotide release factor                                                   | RANGRF   | 717206    |
| RAN, member RAS oncogene family                                                         | RAN      | 709200    |
| Ranbp-type and C3HC4-type zinc finger containing 1                                      | RBCK1    | 714692    |
| Rap guanine nucleotide exchange factor 2                                                | RAPGEF2  | 704717    |
| RAP1, GTP-GDP dissociation stimulator 1                                                 | RAP1GDS1 | 706303    |
| RAP2A, member of RAS oncogene family                                                    | RAP2A    | 697215    |
| RAR-related orphan receptor B                                                           | RORB     | 703310    |
| Ras and Rab interactor 2                                                                | RIN2     | 702775    |
| Ras association (ralgds/AF-6) and pleckstrin homology domains 1                         | RAPH1    | 705065    |
| Ras association (ralgds/AF-6) domain family member 4                                    | RASSF4   | 706096    |
| Ras homolog family member A                                                             | RHOA     | 706455    |
| Ras homolog family member B                                                             | RHOB     | 702141    |
| Ras homolog family member C                                                             | RHOC     | 706034    |
| Ras homolog family member G                                                             | RHOG     | 718113    |
| Ras homolog family member J                                                             | RHOJ     | 705603    |
| Ras homolog family member U                                                             | RHOU     | 695385    |
| RAS p21 protein activator (gtpase activating protein) 1                                 | RASA1    | 694085    |
| RAS p21 protein activator 2                                                             | RASA2    | 715074    |
| RAS protein activator like 2                                                            | RASAL2   | 718958    |
| RAS, dexamethasone-induced 1                                                            | RASD1    | 698839    |
| RAS-like family 10 member A                                                             | RASL10A  | 714587    |
| RAS-like family 11 member A                                                             | RASL11A  | 710394    |
| Ras-like without CAAX 1                                                                 | RIT1     | 717985    |
| Ras-related C3 botulinum toxin substrate 3 (rho family, small GTP binding protein Rac3) | RAC3     | 719305    |
| Ras-related GTP binding A                                                               | RRAGA    | 100430224 |
| Ras-related GTP binding C                                                               | RRAGC    | 715549    |
| RB1 inducible coiled-coil 1                                                             | RB1CC1   | 710330    |
| RBPJ interacting and tubulin associated 1                                               | RITA1    | 712837    |

|                                                                                       |         |        |
|---------------------------------------------------------------------------------------|---------|--------|
| Reactive oxygen species modulator 1                                                   | ROMO1   | 711369 |
| Rearranged L-myc fusion                                                               | RLF     | 693503 |
| Receptor (G protein-coupled) activity modifying protein 1                             | RAMP1   | 574329 |
| Receptor (G protein-coupled) activity modifying protein 3                             | RAMP3   | 697349 |
| Receptor accessory protein 1                                                          | REEP1   | 697390 |
| Receptor accessory protein 4                                                          | REEP4   | 707267 |
| Receptor interacting serine/threonine kinase 4                                        | RIPK4   | 715077 |
| Receptor tyrosine kinase-like orphan receptor 1                                       | ROR1    | 700760 |
| Receptor tyrosine kinase-like orphan receptor 2                                       | ROR2    | 715482 |
| Recq helicase-like                                                                    | RECQL   | 705871 |
| Regucalcin                                                                            | RGN     | 705733 |
| Regulation of nuclear pre-mrna domain containing 1A                                   | RPRD1A  | 709217 |
| Regulator of calcineurin 1                                                            | RCAN1   | 697108 |
| Regulator of cell cycle                                                               | RGCC    | 698962 |
| Regulator of chromosome condensation (RCC1) and BTB (POZ) domain containing protein 1 | RCBTB1  | 706627 |
| Regulator of G-protein signaling 10                                                   | RGS10   | 703125 |
| Regulator of G-protein signaling 14                                                   | RGS14   | 699625 |
| Regulator of G-protein signaling 22                                                   | RGS22   | 704685 |
| Regulator of microtubule dynamics 1                                                   | RMDN1   | 694237 |
| Regulatory factor X associated ankyrin containing protein                             | RFXANK  | 719706 |
| Related RAS viral (r-ras) oncogene homolog 2                                          | RRAS2   | 699700 |
| REM2 and RAB-like small gtpase 1                                                      | RSG1    | 697922 |
| Renin                                                                                 | REN     | 574299 |
| Replication factor C subunit 3                                                        | RFC3    | 714220 |
| Replication factor C subunit 5                                                        | RFC5    | 694166 |
| Replication protein A1                                                                | RPA1    | 721272 |
| Replication protein A2                                                                | RPA2    | 716612 |
| Replication protein A3                                                                | RPA3    | 696248 |
| Replication protein A4                                                                | RPA4    | 699274 |
| Replication termination factor 2 domain containing 1                                  | RTFDC1  | 697672 |
| Replication timing regulatory factor 1                                                | RIF1    | 694817 |
| Required for meiotic nuclear division 1 homolog                                       | RMND1   | 704665 |
| Required for meiotic nuclear division 5 homolog B                                     | RMND5B  | 701840 |
| REST corepressor 1                                                                    | RCOR1   | 694670 |
| Retention in endoplasmic reticulum sorting receptor 1                                 | RER1    | 694540 |
| Reticulon 4                                                                           | RTN4    | 619181 |
| Reticulon 4 interacting protein 1                                                     | RTN4IP1 | 697236 |
| Retinitis pigmentosa 9 (autosomal dominant)                                           | RP9     | 708632 |
| Retinoblastoma 1                                                                      | RB1     | 704871 |
| Retinoblastoma binding protein 4                                                      | RBBP4   | 708710 |
| Retinoblastoma binding protein 6                                                      | RBBP6   | 701569 |
| Retinoblastoma binding protein 7                                                      | RBBP7   | 713843 |
| Retinoblastoma binding protein 8                                                      | RBBP8   | 677718 |
| Retinoic acid induced 1                                                               | RAI1    | 699215 |
| Retinoic acid induced 14                                                              | RAI14   | 698620 |
| Retinoic acid induced 2                                                               | RAI2    | 693329 |
| Retinoic acid receptor responder (tazarotene induced) 2                               | RARRES2 | 704993 |

|                                                            |          |           |
|------------------------------------------------------------|----------|-----------|
| Retinoic acid receptor, gamma                              | RARG     | 699532    |
| Retinol dehydrogenase 5 (11-cis/9-cis)                     | RDH5     | 709644    |
| Reversion-inducing-cysteine-rich protein with kazal motifs | RECK     | 694043    |
| RFT1 homolog                                               | RFT1     | 694586    |
| Rh family, C glycoprotein                                  | RHCG     | 664731    |
| Rho family gtpase 3                                        | RND3     | 694168    |
| Rho gtpase activating protein 10                           | ARHGAP10 | 708458    |
| Rho gtpase activating protein 12                           | ARHGAP12 | 696402    |
| Rho gtpase activating protein 15                           | ARHGAP15 | 705311    |
| Rho gtpase activating protein 18                           | ARHGAP18 | 711107    |
| Rho gtpase activating protein 21                           | ARHGAP21 | 706428    |
| Rho guanine nucleotide exchange factor (GEF) 3             | ARHGEF3  | 704764    |
| Rho guanine nucleotide exchange factor 1                   | ARHGEF1  | 722198    |
| Rho guanine nucleotide exchange factor 10                  | ARHGEF10 | 722745    |
| Rho guanine nucleotide exchange factor 17                  | ARHGEF17 | 718644    |
| Rho guanine nucleotide exchange factor 5                   | ARHGEF5  | 705891    |
| Rho/Rac guanine nucleotide exchange factor 2               | ARHGEF2  | 719369    |
| Rho-associated, coiled-coil containing protein kinase 1    | ROCK1    | 698223    |
| Rhomboid 5 homolog 2 (Drosophila)                          | RHBDF2   | 707033    |
| Rhomboid domain containing 1                               | RHBDD1   | 707982    |
| Rhomboid domain containing 3                               | RHBDD3   | 714479    |
| Rho-related BTB domain containing 1                        | RHOBTB1  | 699132    |
| Rho-related BTB domain containing 3                        | RHOBTB3  | 702554    |
| Rhotekin                                                   | RTKN     | 708722    |
| Rhox homeobox family, member 1                             | RHOXF1   | 695129    |
| Ribonuclease H2 subunit A                                  | RNASEH2A | 716701    |
| Ribonuclease H2 subunit B                                  | RNASEH2B | 707995    |
| Ribonuclease P/MRP 14kda subunit                           | RPP14    | 706788    |
| Ribonuclease P/MRP 21kda subunit                           | RPP21    | 713056    |
| Ribonuclease P/MRP 30kda subunit                           | RPP30    | 696537    |
| Ribonuclease P/MRP 40kda subunit                           | RPP40    | 710505    |
| Ribonuclease, rnase A family, 1 (pancreatic)               | RNASE1   | 704676    |
| Ribonuclease, rnase A family, 4                            | RNASE4   | 703903    |
| Ribonuclease, rnase K                                      | RNASEK   | 100423496 |
| Ribonucleic acid export 1                                  | RAE1     | 696706    |
| Ribonucleoprotein, PTB-binding 1                           | RAVER1   | 715250    |
| Ribonucleotide reductase M1                                | RRM1     | 717990    |
| Ribophorin I                                               | RPN1     | 705437    |
| Ribophorin II                                              | RPN2     | 708971    |
| Ribosomal protein L10 like                                 | RPL10L   | 702986    |
| Ribosomal protein l10a                                     | RPL10A   | 718783    |
| Ribosomal protein L17                                      | RPL17    | 698967    |
| Ribosomal protein L22                                      | RPL22    | 703050    |
| Ribosomal protein L23                                      | RPL23    | 694719    |
| Ribosomal protein l23a                                     | RPL23A   | 710490    |
| Ribosomal protein L24                                      | RPL24    | 702381    |
| Ribosomal protein L26                                      | RPL26    | 717378    |
| Ribosomal protein L26 like 1                               | RPL26L1  | 703230    |

|                                                                                       |          |           |
|---------------------------------------------------------------------------------------|----------|-----------|
| Ribosomal protein L27                                                                 | RPL27    | 712352    |
| Ribosomal protein l27a                                                                | RPL27A   | 708863    |
| Ribosomal protein L29                                                                 | RPL29    | 698602    |
| Ribosomal protein L3                                                                  | RPL3     | 707176    |
| Ribosomal protein L30                                                                 | RPL30    | 703120    |
| Ribosomal protein L35                                                                 | RPL35    | 693604    |
| Ribosomal protein l35a                                                                | RPL35A   | 714858    |
| Ribosomal protein L4                                                                  | RPL4     | 710590    |
| Ribosomal protein L7 like 1                                                           | RPL7L1   | 698786    |
| Ribosomal protein l7a                                                                 | RPL7A    | 722215    |
| Ribosomal protein L8                                                                  | RPL8     | 708535    |
| Ribosomal protein S10                                                                 | RPS10    | 718606    |
| Ribosomal protein S11                                                                 | RPS11    | 718844    |
| Ribosomal protein S13                                                                 | RPS13    | 697513    |
| Ribosomal protein S14                                                                 | RPS14    | 710901    |
| Ribosomal protein S15                                                                 | RPS15    | 707241    |
| Ribosomal protein S16                                                                 | RPS16    | 697219    |
| Ribosomal protein S17-like                                                            | RPS17L   | 100425104 |
| Ribosomal protein S19 binding protein 1                                               | RPS19BP1 | 704079    |
| Ribosomal protein S2                                                                  | RPS2     | 693615    |
| Ribosomal protein S21                                                                 | RPS21    | 699565    |
| Ribosomal protein S27                                                                 | RPS27    | 106992520 |
| Ribosomal protein S27 like                                                            | RPS27L   | 705483    |
| Ribosomal protein s27a                                                                | RPS27A   | 718909    |
| Ribosomal protein S28                                                                 | RPS28    | 707133    |
| Ribosomal protein S4, X-linked                                                        | RPS4X    | 699397    |
| Ribosomal protein S5                                                                  | RPS5     | 711259    |
| Ribosomal protein S6 kinase, 90kda, polypeptide 1                                     | RPS6KA1  | 714794    |
| Ribosomal protein S6 kinase, 90kda, polypeptide 4                                     | RPS6KA4  | 717574    |
| Ribosomal protein S7                                                                  | RPS7     | 721900    |
| Ribosomal protein S8                                                                  | RPS8     | 703957    |
| Ribosomal protein S9                                                                  | RPS9     | 694053    |
| Ribosomal protein, large, P0                                                          | RPLP0    | 574363    |
| Ribosomal protein, large, P1                                                          | RPLP1    | 695442    |
| Ribosomal protein, large, P2                                                          | RPLP2    | 700698    |
| Ribosomal RNA adenine dimethylase domain containing 1                                 | RRNAD1   | 718599    |
| Ribosomal RNA processing 12 homolog                                                   | RRP12    | 705854    |
| Ribosomal RNA processing 8, methyltransferase, homolog (yeast)                        | RRP8     | 712011    |
| Ribosomal RNA processing 9, small subunit (SSU) processome component, homolog (yeast) | RRP9     | 699421    |
| Ribosome production factor 1 homolog                                                  | RPF1     | 710286    |
| Ribosome production factor 2 homolog                                                  | RPF2     | 696378    |
| Ribulose-5-phosphate-3-epimerase                                                      | RPE      | 711322    |
| Ring finger and WD repeat domain 2, E3 ubiquitin protein ligase                       | RFWD2    | 708802    |
| Ring finger protein 112                                                               | RNF112   | 703312    |
| Ring finger protein 115                                                               | RNF115   | 697067    |
| Ring finger protein 121                                                               | RNF121   | 718216    |
| Ring finger protein 126                                                               | RNF126   | 702842    |

|                                                          |         |           |
|----------------------------------------------------------|---------|-----------|
| Ring finger protein 130                                  | RNF130  | 715356    |
| Ring finger protein 14                                   | RNF14   | 705363    |
| Ring finger protein 149                                  | RNF149  | 710926    |
| Ring finger protein 150                                  | RNF150  | 702799    |
| Ring finger protein 167                                  | RNF167  | 710656    |
| Ring finger protein 181                                  | RNF181  | 695977    |
| Ring finger protein 185                                  | RNF185  | 718351    |
| Ring finger protein 20                                   | RNF20   | 713614    |
| Ring finger protein 208                                  | RNF208  | 705563    |
| Ring finger protein 219                                  | RNF219  | 697577    |
| Ring finger protein 26                                   | RNF26   | 704755    |
| Ring finger protein 32                                   | RNF32   | 716703    |
| Ring finger protein 38                                   | RNF38   | 693346    |
| Ring finger protein 40, E3 ubiquitin protein ligase      | RNF40   | 713148    |
| Ring finger protein 41, E3 ubiquitin protein ligase      | RNF41   | 711969    |
| Ring finger protein 5, E3 ubiquitin protein ligase       | RNF5    | 717234    |
| Ring finger protein, transmembrane 1                     | RNFT1   | 712052    |
| RIO kinase 2                                             | RIOK2   | 700738    |
| Ripply transcriptional repressor 3                       | RIPPLY3 | 100429272 |
| RNA 2',3'-cyclic phosphate and 5'-OH ligase              | RTCB    | 717258    |
| RNA 3'-terminal phosphate cyclase                        | RTCA    | 711623    |
| RNA binding motif (RNP1, RRM) protein 3                  | RBM3    | 710689    |
| RNA binding motif protein 10                             | RBM10   | 711791    |
| RNA binding motif protein 15                             | RBM15   | 701414    |
| RNA binding motif protein 17                             | RBM17   | 712996    |
| RNA binding motif protein 18                             | RBM18   | 698457    |
| RNA binding motif protein 22                             | RBM22   | 712713    |
| RNA binding motif protein 23                             | RBM23   | 712650    |
| RNA binding motif protein 28                             | RBM28   | 698858    |
| RNA binding motif protein 39                             | RBM39   | 704198    |
| RNA binding motif protein 41                             | RBM41   | 701761    |
| RNA binding motif protein 42                             | RBM42   | 709852    |
| RNA binding motif protein 45                             | RBM45   | 702714    |
| RNA binding motif protein 5                              | RBM5    | 704114    |
| RNA binding motif protein 7                              | RBM7    | 695401    |
| RNA binding motif protein, X-linked 2                    | RBMX2   | 703472    |
| RNA binding motif, single stranded interacting protein 1 | RBMS1   | 703608    |
| RNA binding motif, single stranded interacting protein 2 | RBMS2   | 713163    |
| RNA binding protein S1, serine-rich domain               | RNPS1   | 695816    |
| RNA binding protein with multiple splicing               | RBPM5   | 694363    |
| RNA binding protein, fox-1 homolog (C. Elegans) 2        | RBFOX2  | 693642    |
| RNA exonuclease 2                                        | REXO2   | 695292    |
| RNA methyltransferase like 1                             | RNMTL1  | 700204    |
| RNA polymerase II associated protein 1                   | RPAP1   | 706543    |
| RNA polymerase II associated protein 3                   | RPAP3   | 703749    |
| RNA pseudouridylate synthase domain containing 3         | RPUSD3  | 700349    |
| RNA terminal phosphate cyclase-like 1                    | RCL1    | 694568    |
| Rotatin                                                  | RTTN    | 703989    |

|                                                                            |          |           |
|----------------------------------------------------------------------------|----------|-----------|
| Round spermatid basic protein 1-like                                       | RSBN1L   | 693814    |
| RPTOR independent companion of MTOR, complex 2                             | RICTOR   | 694915    |
| RRN3 homolog, RNA polymerase I transcription factor                        | RRN3     | 713500    |
| Runt-related transcription factor 1; translocated to, 1 (cyclin D-related) | RUNX1T1  | 696934    |
| Ruvb-like AAA ATPase 1                                                     | RUVBL1   | 706044    |
| Ruvb-like AAA ATPase 2                                                     | RUVBL2   | 100428792 |
| RWD domain containing 2A                                                   | RWDD2A   | 694598    |
| RWD domain containing 3                                                    | RWDD3    | 709817    |
| RWD domain containing 4                                                    | RWDD4    | 708882    |
| S100 calcium binding protein A10                                           | S100A10  | 574374    |
| S100 calcium binding protein A4                                            | S100A4   | 715115    |
| S100 calcium binding protein A6                                            | S100A6   | 715169    |
| SAC1 suppressor of actin mutations 1-like (yeast)                          | SACM1L   | 714107    |
| SAC3 domain containing 1                                                   | SAC3D1   | 717043    |
| SAGA complex associated factor 29                                          | SGF29    | 709124    |
| SAMM50 sorting and assembly machinery component                            | SAMM50   | 715675    |
| SAP30 binding protein                                                      | SAP30BP  | 703077    |
| SAP30-like                                                                 | SAP30L   | 714400    |
| Sarcoglycan epsilon                                                        | SGCE     | 700104    |
| Sarcoglycan zeta                                                           | SGCZ     | 100430472 |
| Sarcolemma associated protein                                              | SLMAP    | 703086    |
| Sarcospan                                                                  | SSPN     | 708482    |
| Scaffold attachment factor B                                               | SAFB     | 696356    |
| Scaffold attachment factor B2                                              | SAFB2    | 696236    |
| SCAN domain containing 1                                                   | SCAND1   | 711046    |
| Scavenger receptor class F member 2                                        | SCARF2   | 695466    |
| Schlafen like 1                                                            | SLFNL1   | 695605    |
| SCY1-like, kinase-like 2                                                   | SCYL2    | 695284    |
| SCY1-like, kinase-like 3                                                   | SCYL3    | 701768    |
| SEC11 homolog A, signal peptidase complex subunit                          | SEC11A   | 695951    |
| SEC13 homolog, nuclear pore and COPII coat complex component               | SEC13    | 697339    |
| SEC14 and spectrin domain containing 1                                     | SESTD1   | 703755    |
| SEC16 homolog B, endoplasmic reticulum export factor                       | SEC16B   | 709635    |
| SEC22 homolog A, vesicle trafficking protein                               | SEC22A   | 715277    |
| SEC22 homolog C, vesicle trafficking protein                               | SEC22C   | 716351    |
| Sec23 homolog A, COPII coat complex component                              | SEC23A   | 698500    |
| Sec23 homolog B, COPII coat complex component                              | SEC23B   | 698440    |
| SEC23 interacting protein                                                  | SEC23IP  | 704155    |
| SEC24 homolog A, COPII coat complex component                              | SEC24A   | 711109    |
| SEC24 homolog C, COPII coat complex component                              | SEC24C   | 714688    |
| SEC24 homolog D, COPII coat complex component                              | SEC24D   | 707521    |
| SEC31 homolog A, COPII coat complex component                              | SEC31A   | 693687    |
| Sec61 translocon alpha 1 subunit                                           | SEC61A1  | 709787    |
| Sec61 translocon alpha 2 subunit                                           | SEC61A2  | 100427728 |
| Sec61 translocon beta subunit                                              | SEC61B   | 717815    |
| Sec61 translocon gamma subunit                                             | SEC61G   | 716898    |
| Secernin 2                                                                 | SCRN2    | 694571    |
| SECIS binding protein 2                                                    | SECISBP2 | 697442    |

|                                                                                                                  |           |           |
|------------------------------------------------------------------------------------------------------------------|-----------|-----------|
| Secreted frizzled-related protein 1                                                                              | SFRP1     | 702876    |
| Secreted frizzled-related protein 4                                                                              | SFRP4     | 574393    |
| Secreted frizzled-related protein 5                                                                              | SFRP5     | 707738    |
| Secretion associated, Ras related gtpase 1A                                                                      | SAR1A     | 711277    |
| Secretogranin V                                                                                                  | SCG5      | 694088    |
| Secretory carrier membrane protein 2                                                                             | SCAMP2    | 709720    |
| Sedoheptulokinase                                                                                                | SHPK      | 721465    |
| Sel-1 suppressor of lin-12-like 3 (C. Elegans)                                                                   | SEL1L3    | 695033    |
| Selenophosphate synthetase 1                                                                                     | SEPHS1    | 696038    |
| Selenophosphate synthetase 2                                                                                     | SEPHS2    | 710575    |
| Selenoprotein K                                                                                                  | SELK      | 693421    |
| Selenoprotein M                                                                                                  | SELM      | 718290    |
| Selenoprotein P, plasma, 1                                                                                       | SEPP1     | 698917    |
| Selenoprotein W, 1                                                                                               | SEPW1     | 718370    |
| Sema domain, immunoglobulin domain (Ig), short basic domain, secreted, (semaphorin) 3F                           | SEMA3F    | 703995    |
| Sema domain, immunoglobulin domain (Ig), transmembrane domain (TM) and short cytoplasmic domain, (semaphorin) 4D | SEMA4D    | 697697    |
| Sema domain, transmembrane domain (TM), and cytoplasmic domain, (semaphorin) 6C                                  | SEMA6C    | 709464    |
| Sema domain, transmembrane domain (TM), and cytoplasmic domain, (semaphorin) 6D                                  | SEMA6D    | 713885    |
| Serglycin                                                                                                        | SRGN      | 712299    |
| Serine carboxypeptidase 1                                                                                        | SCPEP1    | 708197    |
| Serine dehydratase-like                                                                                          | SDSL      | 714721    |
| Serine incorporator 1                                                                                            | SERINC1   | 713999    |
| Serine palmitoyltransferase small subunit A                                                                      | SPTSSA    | 717580    |
| Serine/arginine repetitive matrix 1                                                                              | SRRM1     | 712258    |
| Serine/arginine-rich splicing factor 1                                                                           | SRSF1     | 713958    |
| Serine/arginine-rich splicing factor 11                                                                          | SRSF11    | 702698    |
| Serine/arginine-rich splicing factor 12                                                                          | SRSF12    | 700497    |
| Serine/arginine-rich splicing factor 3                                                                           | SRSF3     | 719123    |
| Serine/arginine-rich splicing factor 4                                                                           | SRSF4     | 717401    |
| Serine/arginine-rich splicing factor 7                                                                           | SRSF7     | 713388    |
| Serine/arginine-rich splicing factor 8                                                                           | SRSF8     | 699079    |
| Serine/threonine kinase 11 interacting protein                                                                   | STK11IP   | 704531    |
| Serine/threonine kinase 24                                                                                       | STK24     | 697841    |
| Serine/threonine kinase 25                                                                                       | STK25     | 701297    |
| Serine/threonine kinase 3                                                                                        | STK3      | 707425    |
| Serine/threonine kinase 31                                                                                       | STK31     | 703886    |
| Serine/threonine kinase 35                                                                                       | STK35     | 716423    |
| Serine/threonine kinase 36                                                                                       | STK36     | 699940    |
| Serologically defined colon cancer antigen 3                                                                     | SDCCAG3   | 721750    |
| Serologically defined colon cancer antigen 8                                                                     | SDCCAG8   | 705545    |
| Serpin peptidase inhibitor, clade A (alpha-1 antiproteinase, antitrypsin), member 3                              | SERPINA3  | 574106    |
| Serpin peptidase inhibitor, clade B (ovalbumin), member 10                                                       | SERPINB10 | 100430160 |
| Serpin peptidase inhibitor, clade B (ovalbumin), member 6                                                        | SERPINB6  | 716411    |

|                                                                                                        |          |           |
|--------------------------------------------------------------------------------------------------------|----------|-----------|
| Serpin peptidase inhibitor, clade B (ovalbumin), member 7                                              | SERPINB7 | 701671    |
| Serpin peptidase inhibitor, clade C (antithrombin), member 1                                           | SERPINC1 | 708854    |
| Serpin peptidase inhibitor, clade E (nexin, plasminogen activator inhibitor type 1), member 2          | SERPINE2 | 707121    |
| Serpin peptidase inhibitor, clade F (alpha-2 antiplasmin, pigment epithelium derived factor), member 2 | SERPINF2 | 100427696 |
| Serpin peptidase inhibitor, clade G (C1 inhibitor), member 1                                           | SERPING1 | 703928    |
| Serpin peptidase inhibitor, clade I (neuroserpin), member 1                                            | SERPINI1 | 699483    |
| Serrate, RNA effector molecule                                                                         | SRRT     | 713235    |
| SERTA domain containing 1                                                                              | SERTAD1  | 701562    |
| Serum amyloid A like 1                                                                                 | SAAL1    | 695747    |
| Serum deprivation response                                                                             | SDPR     | 694299    |
| Sestrin 2                                                                                              | SESN2    | 716904    |
| Sestrin 3                                                                                              | SESN3    | 699329    |
| SET and MYND domain containing 2                                                                       | SMYD2    | 709375    |
| SET and MYND domain containing 3                                                                       | SMYD3    | 703402    |
| SET domain containing (lysine methyltransferase) 7                                                     | SETD7    | 700426    |
| SET domain containing 2                                                                                | SETD2    | 711825    |
| SET domain containing 3                                                                                | SETD3    | 705369    |
| SET domain containing 4                                                                                | SETD4    | 696003    |
| SET domain containing 5                                                                                | SETD5    | 704174    |
| SET domain containing 9                                                                                | SETD9    | 708019    |
| SET domain, bifurcated 1                                                                               | SETDB1   | 716141    |
| Sex comb on midleg homolog 1 (Drosophila)                                                              | SCMH1    | 695722    |
| Sex comb on midleg-like 1 (Drosophila)                                                                 | SCML1    | 714239    |
| SFI1 centrin binding protein                                                                           | SFI1     | 716833    |
| SFT2 domain containing 3                                                                               | SFT2D3   | 699830    |
| SGT1 homolog, MIS12 kinetochore complex assembly cochaperone                                           | SUGT1    | 694046    |
| SH2 domain containing 2A                                                                               | SH2D2A   | 718686    |
| SH2 domain containing 3C                                                                               | SH2D3C   | 699706    |
| SH2B adaptor protein 2                                                                                 | SH2B2    | 714861    |
| SH3 domain containing ring finger 1                                                                    | SH3RF1   | 694082    |
| SH3-domain binding protein 1                                                                           | SH3BP1   | 700647    |
| SH3-domain binding protein 4                                                                           | SH3BP4   | 693393    |
| SH3-domain GRB2-like endophilin B1                                                                     | SH3GLB1  | 712393    |
| SH3-domain GRB2-like endophilin B2                                                                     | SH3GLB2  | 716994    |
| SHANK associated RH domain interactor                                                                  | SHARPIN  | 713534    |
| SHC (Src homology 2 domain containing) transforming protein 1                                          | SHC1     | 718982    |
| SHC SH2-domain binding protein 1                                                                       | SHCBP1   | 716009    |
| SHOC2 leucine-rich repeat scaffold protein                                                             | SHOC2    | 695572    |
| Short chain dehydrogenase/reductase family 42E, member 1                                               | SDR42E1  | 714229    |
| Short coiled-coil protein                                                                              | SCOC     | 698242    |
| Shugoshin-like 1 (S. Pombe)                                                                            | SGOL1    | 698231    |
| Siah E3 ubiquitin protein ligase 1                                                                     | SIAH1    | 716629    |
| Siah E3 ubiquitin protein ligase 2                                                                     | SIAH2    | 710222    |
| SID1 transmembrane family member 1                                                                     | SIDT1    | 709487    |
| Sideroflexin 2                                                                                         | SFXN2    | 713841    |
| Sideroflexin 4                                                                                         | SFXN4    | 702765    |



|                                                                     |         |           |
|---------------------------------------------------------------------|---------|-----------|
| Sigma non-opioid intracellular receptor 1                           | SIGMAR1 | 700469    |
| Signal peptidase complex subunit 1                                  | SPCS1   | 696426    |
| Signal peptidase complex subunit 2                                  | SPCS2   | 694179    |
| Signal peptide peptidase like 3                                     | SPPL3   | 700898    |
| Signal peptide, CUB domain, EGF-like 2                              | SCUBE2  | 708152    |
| Signal recognition particle 54kda                                   | SRP54   | 694360    |
| Signal recognition particle 68kda                                   | SRP68   | 705568    |
| Signal sequence receptor, alpha                                     | SSR1    | 693818    |
| Signal sequence receptor, beta (translocon-associated protein beta) | SSR2    | 719383    |
| Signal sequence receptor, delta                                     | SSR4    | 697266    |
| Signal transducer and activator of transcription 1                  | STAT1   | 693650    |
| Sin3A associated protein 25kda                                      | SAP25   | 106997576 |
| Sin3A associated protein 30kda                                      | SAP30   | 696519    |
| Single stranded DNA binding protein 3                               | SSBP3   | 715114    |
| Single stranded DNA binding protein 4                               | SSBP4   | 719496    |
| Single-pass membrane protein with coiled-coil domains 4             | SMCO4   | 695982    |
| Single-stranded DNA binding protein 1, mitochondrial                | SSBP1   | 694459    |
| Single-strand-selective monofunctional uracil-DNA glycosylase 1     | SMUG1   | 704743    |
| Sirtuin 4                                                           | SIRT4   | 720498    |
| Sirtuin 6                                                           | SIRT6   | 714545    |
| Sirtuin 7                                                           | SIRT7   | 715069    |
| SIVA1, apoptosis-inducing factor                                    | SIVA1   | 706688    |
| SIX homeobox 5                                                      | SIX5    | 715373    |
| Sjogren syndrome nuclear autoantigen 1                              | SSNA1   | 706507    |
| SKI-like proto-oncogene                                             | SKIL    | 696680    |
| Slingshot protein phosphatase 2                                     | SSH2    | 711898    |
| SLIT and NTRK like family member 1                                  | SLITRK1 | 699217    |
| SLU7 homolog, splicing factor                                       | SLU7    | 696023    |
| SLX1 homolog A, structure-specific endonuclease subunit             | SLX1A   | 709225    |
| SMAD family member 1                                                | SMAD1   | 574340    |
| SMAD family member 4                                                | SMAD4   | 701803    |
| Smad nuclear interacting protein 1                                  | SNIP1   | 713733    |
| Small arfgap2                                                       | SMAP2   | 694502    |
| Small cell adhesion glycoprotein                                    | SMAGP   | 694774    |
| Small integral membrane protein 11A                                 | SMIM11A | 702792    |
| Small integral membrane protein 13                                  | SMIM13  | 703387    |
| Small integral membrane protein 15                                  | SMIM15  | 693623    |
| Small integral membrane protein 19                                  | SMIM19  | 705371    |
| Small nuclear ribonucleoprotein D1 polypeptide                      | SNRPD1  | 698965    |
| Small nuclear ribonucleoprotein D2 polypeptide                      | SNRPD2  | 715183    |
| Small nuclear ribonucleoprotein polypeptide A                       | SNRPA   | 702730    |
| Small nuclear ribonucleoprotein polypeptide A'                      | SNRPA1  | 694876    |
| Small nuclear ribonucleoprotein polypeptide B                       | SNRPB2  | 695387    |
| Small nuclear ribonucleoprotein polypeptide E                       | SNRPE   | 701418    |
| Small nuclear ribonucleoprotein polypeptide G                       | SNRPG   | 702586    |
| Small nuclear ribonucleoprotein polypeptides B and B1               | SNRPB   | 716578    |
| Small nuclear ribonucleoprotein, U1 70kda subunit                   | SNRNP70 | 719090    |
| Small nuclear ribonucleoprotein, U11/U12 35kda subunit              | SNRNP35 | 702933    |

|                                                                                             |          |        |
|---------------------------------------------------------------------------------------------|----------|--------|
| Small nuclear ribonucleoprotein, U4/U6.U5 27kda subunit                                     | SNRNP27  | 708670 |
| Small nuclear ribonucleoprotein, U5 40kda subunit                                           | SNRNP40  | 705059 |
| Small nuclear RNA activating complex polypeptide 2                                          | SNAPC2   | 706176 |
| Small nuclear RNA activating complex polypeptide 5                                          | SNAPC5   | 710777 |
| Small ubiquitin-like modifier 1                                                             | SUMO1    | 703644 |
| Small ubiquitin-like modifier 2                                                             | SUMO2    | 705512 |
| Small ubiquitin-like modifier 3                                                             | SUMO3    | 710764 |
| Small vasohibin binding protein                                                             | SVBP     | 698308 |
| SMG5 nonsense mediated mrna decay factor                                                    | SMG5     | 719446 |
| SMG7 nonsense mediated mrna decay factor                                                    | SMG7     | 717603 |
| SMG8 nonsense mediated mrna decay factor                                                    | SMG8     | 711172 |
| SMG9 nonsense mediated mrna decay factor                                                    | SMG9     | 710940 |
| Smoothelin                                                                                  | SMTN     | 716424 |
| Smu-1 suppressor of mec-8 and unc-52 homolog (C. Elegans)                                   | SMU1     | 703656 |
| SMYD family member 5                                                                        | SMYD5    | 705926 |
| SNAP-associated protein                                                                     | SNAPIN   | 715546 |
| SNF related kinase                                                                          | SNRK     | 715803 |
| SNRPN upstream reading frame                                                                | SNURF    | 711028 |
| Sodium channel and clathrin linker 1                                                        | SCLT1    | 693822 |
| Sodium channel modifier 1                                                                   | SCNM1    | 709922 |
| Sodium channel, non voltage gated 1 beta subunit                                            | SCNN1B   | 700093 |
| Solute carrier family 10 member 3                                                           | SLC10A3  | 700759 |
| Solute carrier family 12 (potassium/chloride transporter), member 6                         | SLC12A6  | 697536 |
| Solute carrier family 12 (sodium/potassium/chloride transporter), member 2                  | SLC12A2  | 704672 |
| Solute carrier family 15 (oligopeptide transporter), member 2                               | SLC15A2  | 574375 |
| Solute carrier family 15 (oligopeptide transporter), member 3                               | SLC15A3  | 696060 |
| Solute carrier family 16 member 11                                                          | SLC16A11 | 721775 |
| Solute carrier family 16, member 2 (thyroid hormone transporter)                            | SLC16A2  | 703252 |
| Solute carrier family 17 (vesicular glutamate transporter), member 8                        | SLC17A8  | 695508 |
| Solute carrier family 18, subfamily B, member 1                                             | SLC18B1  | 708518 |
| Solute carrier family 20 (phosphate transporter), member 1                                  | SLC20A1  | 699462 |
| Solute carrier family 22 (organic cation/carnitine transporter), member 5                   | SLC22A5  | 707590 |
| Solute carrier family 22 member 14                                                          | SLC22A14 | 696120 |
| Solute carrier family 22 member 15                                                          | SLC22A15 | 710102 |
| Solute carrier family 22 member 17                                                          | SLC22A17 | 713765 |
| Solute carrier family 22 member 18                                                          | SLC22A18 | 721230 |
| Solute carrier family 23 (ascorbic acid transporter), member 1                              | SLC23A1  | 693491 |
| Solute carrier family 25 (aspartate/glutamate carrier), member 12                           | SLC25A12 | 695173 |
| Solute carrier family 25 (carnitine/acylcarnitine translocase), member 20                   | SLC25A20 | 709029 |
| Solute carrier family 25 (mitochondrial carrier, brain), member 14                          | SLC25A14 | 703255 |
| Solute carrier family 25 (mitochondrial carrier; adenine nucleotide translocator), member 5 | SLC25A5  | 693502 |
| Solute carrier family 25 (mitochondrial carrier; adenine nucleotide translocator), member 6 | SLC25A6  | 719811 |
| Solute carrier family 25 (mitochondrial carrier; citrate transporter), member 1             | SLC25A1  | 719075 |
| Solute carrier family 25 (mitochondrial carrier; oxoglutarate carrier),                     | SLC25A11 | 710569 |

|                                                                                          |          |        |
|------------------------------------------------------------------------------------------|----------|--------|
| member 11                                                                                |          |        |
| Solute carrier family 25 (mitochondrial carrier; phosphate carrier), member 24           | SLC25A24 | 694803 |
| Solute carrier family 25 (mitochondrial carrier; phosphate carrier), member 25           | SLC25A25 | 698216 |
| Solute carrier family 25 (mitochondrial carrier; phosphate carrier), member 3            | SLC25A3  | 693780 |
| Solute carrier family 25 (mitochondrial iron transporter), member 28                     | SLC25A28 | 710002 |
| Solute carrier family 25 (mitochondrial iron transporter), member 37                     | SLC25A37 | 710518 |
| Solute carrier family 25 (pyrimidine nucleotide carrier), member 33                      | SLC25A33 | 722285 |
| Solute carrier family 25 (S-adenosylmethionine carrier), member 26                       | SLC25A26 | 697960 |
| Solute carrier family 25 member 30                                                       | SLC25A30 | 702043 |
| Solute carrier family 25 member 46                                                       | SLC25A46 | 705968 |
| Solute carrier family 25, member 44                                                      | SLC25A44 | 719424 |
| Solute carrier family 26 (anion exchanger), member 8                                     | SLC26A8  | 719049 |
| Solute carrier family 27 (fatty acid transporter), member 4                              | SLC27A4  | 722620 |
| Solute carrier family 30 (zinc transporter), member 5                                    | SLC30A5  | 699371 |
| Solute carrier family 35 (adenosine 3'-phospho 5'-phosphosulfate transporter), member B3 | SLC35B3  | 698416 |
| Solute carrier family 35 (UDP-galactose transporter), member A2                          | SLC35A2  | 711587 |
| Solute carrier family 35 (UDP-glca/UDP-galnac transporter), member D1                    | SLC35D1  | 700175 |
| Solute carrier family 35 member A5                                                       | SLC35A5  | 708401 |
| Solute carrier family 35 member B1                                                       | SLC35B1  | 699953 |
| Solute carrier family 35 member E1                                                       | SLC35E1  | 719559 |
| Solute carrier family 37 (glucose-6-phosphate transporter), member 4                     | SLC37A4  | 702269 |
| Solute carrier family 38 member 1                                                        | SLC38A1  | 702135 |
| Solute carrier family 38 member 11                                                       | SLC38A11 | 703062 |
| Solute carrier family 38 member 6                                                        | SLC38A6  | 704017 |
| Solute carrier family 38 member 9                                                        | SLC38A9  | 706752 |
| Solute carrier family 39 (zinc transporter), member 10                                   | SLC39A10 | 696669 |
| Solute carrier family 39 (zinc transporter), member 13                                   | SLC39A13 | 713420 |
| Solute carrier family 39 (zinc transporter), member 2                                    | SLC39A2  | 705112 |
| Solute carrier family 39 (zinc transporter), member 4                                    | SLC39A4  | 708333 |
| Solute carrier family 39 (zinc transporter), member 8                                    | SLC39A8  | 710142 |
| Solute carrier family 4 (anion exchanger), member 1, adaptor protein                     | SLC4A1AP | 701783 |
| Solute carrier family 4 (anion exchanger), member 2                                      | SLC4A2   | 713966 |
| Solute carrier family 4, sodium bicarbonate cotransporter, member 7                      | SLC4A7   | 701925 |
| Solute carrier family 4, sodium borate transporter, member 11                            | SLC4A11  | 718393 |
| Solute carrier family 41 member 3                                                        | SLC41A3  | 716921 |
| Solute carrier family 44 (choline transporter), member 2                                 | SLC44A2  | 715866 |
| Solute carrier family 44 member 3                                                        | SLC44A3  | 714768 |
| Solute carrier family 44 member 4                                                        | SLC44A4  | 715779 |
| Solute carrier family 45 member 3                                                        | SLC45A3  | 697420 |
| Solute carrier family 5 (sodium/inositol cotransporter), member 11                       | SLC5A11  | 701816 |
| Solute carrier family 5 (sodium/multivitamin and iodide cotransporter), member 6         | SLC5A6   | 699074 |
| Solute carrier family 50 (sugar efflux transporter), member 1                            | SLC50A1  | 717424 |
| Solute carrier family 51 alpha subunit                                                   | SLC51A   | 711340 |

|                                                                                               |          |        |
|-----------------------------------------------------------------------------------------------|----------|--------|
| Solute carrier family 52 (riboflavin transporter), member 1                                   | SLC52A1  | 711253 |
| Solute carrier family 6 (neurotransmitter transporter), member 8                              | SLC6A8   | 698307 |
| Solute carrier family 7 (amino acid transporter light chain, bo,+ system), member 9           | SLC7A9   | 703081 |
| Solute carrier family 7 (anionic amino acid transporter), member 13                           | SLC7A13  | 693964 |
| Solute carrier family 9, subfamily A (NHE3, cation proton antiporter 3), member 3 regulator 1 | SLC9A3R1 | 703933 |
| Solute carrier family 9, subfamily A (NHE3, cation proton antiporter 3), member 3 regulator 2 | SLC9A3R2 | 694658 |
| Solute carrier family 9, subfamily A (NHE6, cation proton antiporter 6), member 6             | SLC9A6   | 710429 |
| Solute carrier family 9, subfamily A (NHE9, cation proton antiporter 9), member 9             | SLC9A9   | 713935 |
| Solute carrier organic anion transporter family member 2B1                                    | SLCO2B1  | 694829 |
| SON DNA binding protein                                                                       | SON      | 704712 |
| Sorting nexin 1                                                                               | SNX1     | 706544 |
| Sorting nexin 11                                                                              | SNX11    | 696913 |
| Sorting nexin 12                                                                              | SNX12    | 696408 |
| Sorting nexin 13                                                                              | SNX13    | 714019 |
| Sorting nexin 17                                                                              | SNX17    | 701614 |
| Sorting nexin 2                                                                               | SNX2     | 700507 |
| Sorting nexin 24                                                                              | SNX24    | 700621 |
| Sorting nexin 32                                                                              | SNX32    | 721888 |
| Sorting nexin 33                                                                              | SNX33    | 706309 |
| Sorting nexin 4                                                                               | SNX4     | 716049 |
| Sorting nexin 8                                                                               | SNX8     | 698347 |
| SOS Ras/Rho guanine nucleotide exchange factor 2                                              | SOS2     | 705601 |
| SP110 nuclear body protein                                                                    | SP110    | 714244 |
| Sp2 transcription factor                                                                      | SP2      | 694834 |
| Sp3 transcription factor                                                                      | SP3      | 699901 |
| Sp5 transcription factor                                                                      | SP5      | 693989 |
| SPARC like 1                                                                                  | SPARCL1  | 701468 |
| SPARC related modular calcium binding 1                                                       | SMOC1    | 712994 |
| Spastic paraplegia 11 (autosomal recessive)                                                   | SPG11    | 712221 |
| Spastic paraplegia 21 (autosomal recessive, Mast syndrome)                                    | SPG21    | 712815 |
| Speckle type POZ protein like                                                                 | SPOPL    | 704203 |
| Spectrin, beta, non-erythrocytic 1                                                            | SPTBN1   | 716794 |
| Spectrin, beta, non-erythrocytic 2                                                            | SPTBN2   | 713419 |
| Spen family transcriptional repressor                                                         | SPEN     | 696205 |
| Sperm antigen with calponin homology and coiled-coil domains 1-like                           | SPECC1L  | 707641 |
| Sperm associated antigen 1                                                                    | SPAG1    | 705012 |
| Sperm associated antigen 5                                                                    | SPAG5    | 709400 |
| Sperm associated antigen 6                                                                    | SPAG6    | 704807 |
| Sperm associated antigen 9                                                                    | SPAG9    | 707613 |
| Sperm flagellar 1                                                                             | SPEF1    | 717547 |
| Spermatid perinuclear RNA binding protein                                                     | STRBP    | 695402 |
| Spermatogenesis associated 17                                                                 | SPATA17  | 707859 |
| Spermatogenesis associated 2                                                                  | SPATA2   | 702817 |

|                                                                                              |            |           |
|----------------------------------------------------------------------------------------------|------------|-----------|
| Spermatogenesis associated 25                                                                | SPATA25    | 709097    |
| Spermatogenesis associated 2-like                                                            | SPATA2L    | 699974    |
| Spermatogenesis associated 5-like 1                                                          | SPATA5L1   | 713376    |
| Spermatogenesis associated 7                                                                 | SPATA7     | 693836    |
| Spermatogenesis associated, serine rich 2 like                                               | SPATS2L    | 699458    |
| Spermidine synthase                                                                          | SRM        | 714028    |
| Spermidine/spermine N1-acetyltransferase 1                                                   | SAT1       | 697884    |
| Spermidine/spermine N1-acetyltransferase family member 2                                     | SAT2       | 716044    |
| Spermine synthase                                                                            | SMS        | 698179    |
| S-phase kinase-associated protein 1                                                          | SKP1       | 100423632 |
| S-phase kinase-associated protein 2, E3 ubiquitin protein ligase                             | SKP2       | 700617    |
| Sphingomyelin phosphodiesterase 2                                                            | SMPD2      | 698865    |
| Sphingomyelin phosphodiesterase acid-like 3A                                                 | SMPDL3A    | 713696    |
| Sphingosine-1-phosphate receptor 4                                                           | S1PR4      | 712637    |
| Spindle and kinetochore associated complex subunit 2                                         | SKA2       | 711092    |
| Spindle and kinetochore associated complex subunit 3                                         | SKA3       | 702839    |
| Spinster homolog 1 (Drosophila)                                                              | SPNS1      | 704769    |
| Spla/ryanodine receptor domain and SOCS box containing 3                                     | SPSB3      | 722489    |
| Spla/ryanodine receptor domain and SOCS box containing 4                                     | SPSB4      | 715278    |
| Spleen tyrosine kinase                                                                       | SYK        | 704102    |
| Splicing factor 3a subunit 2                                                                 | SF3A2      | 721469    |
| Splicing factor 3b subunit 5                                                                 | SF3B5      | 699863    |
| Splicing factor 3b subunit 6                                                                 | SF3B6      | 704090    |
| Splicing factor 3b, subunit 1, 155kda                                                        | SF3B1      | 697773    |
| Splicing factor 3b, subunit 4, 49kda                                                         | SF3B4      | 705655    |
| Splicing factor, suppressor of white-apricot family                                          | SFSWAP     | 709551    |
| Split hand/foot malformation (ectrodactyly) type 1                                           | SHFM1      | 698349    |
| Spondin 1, extracellular matrix protein                                                      | SPON1      | 699833    |
| Spondin 2, extracellular matrix protein                                                      | SPON2      | 702450    |
| Sprouty RTK signaling antagonist 1                                                           | SPRY1      | 708752    |
| SPRY domain containing 4                                                                     | SPRYD4     | 713037    |
| SPT16 homolog, facilitates chromatin remodeling subunit                                      | SUPT16H    | 708066    |
| SPT3 homolog, SAGA and STAGA complex component                                               | SUPT3H     | 703447    |
| SPT4 homolog, DSIF elongation factor subunit                                                 | SUPT4H1    | 710214    |
| Squamous cell carcinoma antigen recognized by T-cells 3                                      | SART3      | 705552    |
| Src-like-adaptor                                                                             | SLA        | 697377    |
| Src-related kinase lacking C-terminal regulatory tyrosine and N-terminal myristylation sites | SRMS       | 719587    |
| SRSF protein kinase 1                                                                        | SRPK1      | 719039    |
| SRSF protein kinase 2                                                                        | SRPK2      | 697351    |
| SRSF protein kinase 3                                                                        | SRPK3      | 100429808 |
| SRY-box 13                                                                                   | SOX13      | 700802    |
| SRY-box 17                                                                                   | SOX17      | 694097    |
| SSU72 homolog, RNA polymerase II CTD phosphatase                                             | SSU72      | 702348    |
| ST3 beta-galactoside alpha-2,3-sialyltransferase 1                                           | ST3GAL1    | 698004    |
| ST3 beta-galactoside alpha-2,3-sialyltransferase 4                                           | ST3GAL4    | 717792    |
| ST3 beta-galactoside alpha-2,3-sialyltransferase 5                                           | ST3GAL5    | 696842    |
| ST6 (alpha-N-acetyl-neuraminy-2,3-beta-galactosyl-1,3)-                                      | ST6GALNAC1 | 707339    |

|                                                                            |          |        |
|----------------------------------------------------------------------------|----------|--------|
| N-acetylgalactosaminide alpha-2,6-sialyltransferase 1                      |          |        |
| STAM binding protein                                                       | STAMPB   | 714562 |
| STAM binding protein like 1                                                | STAMBPL1 | 694629 |
| Staphylococcal nuclease and tudor domain containing 1                      | SND1     | 699542 |
| Star related lipid transfer domain containing 13                           | STARD13  | 714104 |
| Star related lipid transfer domain containing 3                            | STARD3   | 697212 |
| Star related lipid transfer domain containing 5                            | STARD5   | 713308 |
| STARD3 N-terminal like                                                     | STARD3NL | 705212 |
| Stathmin 1                                                                 | STMN1    | 719733 |
| Stathmin 3                                                                 | STMN3    | 719538 |
| Stathmin 4                                                                 | STMN4    | 712651 |
| Staufen double-stranded RNA binding protein 1                              | STAU1    | 704197 |
| STE20-related kinase adaptor alpha                                         | STRADA   | 717927 |
| STE20-related kinase adaptor beta                                          | STRADB   | 641449 |
| Stereocilin                                                                | STRC     | 677720 |
| Steroid receptor RNA activator 1                                           | SRA1     | 698169 |
| STIP1 homology and U-box containing protein 1, E3 ubiquitin protein ligase | STUB1    | 697105 |
| Stomatin like 1                                                            | STOML1   | 700510 |
| Stomatin like 2                                                            | STOML2   | 698458 |
| Storkhead box 2                                                            | STOX2    | 693692 |
| Strawberry notch homolog 2 (Drosophila)                                    | SBNO2    | 721186 |
| Stress induced phosphoprotein 1                                            | STIP1    | 717926 |
| Striatin                                                                   | STRN     | 708491 |
| Striatin interacting protein 1                                             | STRIP1   | 700799 |
| Stromal cell derived factor 4                                              | SDF4     | 699804 |
| Stromal cell-derived factor 2                                              | SDF2     | 716189 |
| Stromal interaction molecule 1                                             | STIM1    | 717963 |
| Structural maintenance of chromosomes 2                                    | SMC2     | 713359 |
| Structural maintenance of chromosomes 4                                    | SMC4     | 702615 |
| Structure specific recognition protein 1                                   | SSRP1    | 706614 |
| STT3A, subunit of the oligosaccharyltransferase complex (catalytic)        | STT3A    | 717056 |
| STT3B, subunit of the oligosaccharyltransferase complex (catalytic)        | STT3B    | 703434 |
| SUB1 homolog, transcriptional regulator                                    | SUB1     | 701045 |
| Succinate dehydrogenase complex assembly factor 2                          | SDHAF2   | 693401 |
| Succinate dehydrogenase complex subunit A, flavoprotein (Fp)               | SDHA     | 708018 |
| Succinate dehydrogenase complex subunit B, iron sulfur (Ip)                | SDHB     | 699810 |
| Succinate dehydrogenase complex, subunit D, integral membrane protein      | SDHD     | 711326 |
| Succinate-coa ligase, GDP-forming, beta subunit                            | SUCLG2   | 697454 |
| Sulfatase 2                                                                | SULF2    | 715937 |
| Sulfiredoxin 1                                                             | SRXN1    | 714997 |
| SUMO1/sentrin specific peptidase 5                                         | SEN5     | 710223 |
| SUMO1/sentrin/SMT3 specific peptidase 3                                    | SEN3     | 715884 |
| SUMO-interacting motifs containing 1                                       | SIMC1    | 701880 |
| SUN domain containing ossification factor                                  | SUCO     | 705776 |
| Superkiller viralicidic activity 2-like 2 (S. Cerevisiae)                  | SKIV2L2  | 706419 |
| Superoxide dismutase 1, soluble                                            | SOD1     | 574096 |

|                                                                                                                 |          |           |
|-----------------------------------------------------------------------------------------------------------------|----------|-----------|
| Supervillin                                                                                                     | SVIL     | 695267    |
| Suppression of tumorigenicity 13 (colon carcinoma) (Hsp70 interacting protein)                                  | ST13     | 705664    |
| Suppression of tumorigenicity 5                                                                                 | ST5      | 705444    |
| Suppression of tumorigenicity 7 like                                                                            | ST7L     | 705541    |
| Suppressor of cytokine signaling 1                                                                              | SOCS1    | 711180    |
| Suppressor of fused homolog (Drosophila)                                                                        | SUFU     | 713576    |
| Suppressor of IKBKE 1                                                                                           | SIKE1    | 708999    |
| Suppressor of variegation 3-9 homolog 1                                                                         | SUV39H1  | 711040    |
| Surfeit 2                                                                                                       | SURF2    | 100430368 |
| Surfeit 4                                                                                                       | SURF4    | 100429960 |
| SURP and G-patch domain containing 1                                                                            | SUGP1    | 719772    |
| SURP and G-patch domain containing 2                                                                            | SUGP2    | 719666    |
| Survival motor neuron domain containing 1                                                                       | SMNDC1   | 694761    |
| Survival of motor neuron 1, telomeric                                                                           | SMN1     | 677703    |
| Sushi domain containing 1                                                                                       | SUSD1    | 707656    |
| Sushi domain containing 4                                                                                       | SUSD4    | 703741    |
| Sushi-repeat containing protein, X-linked                                                                       | SRPX     | 697145    |
| SUV3-like helicase                                                                                              | SUPV3L1  | 712081    |
| SWAP switching B-cell complex 70kda subunit                                                                     | SWAP70   | 703651    |
| SWI/SNF related, matrix associated, actin dependent regulator of chromatin, subfamily a, member 2               | SMARCA2  | 696973    |
| SWI/SNF related, matrix associated, actin dependent regulator of chromatin, subfamily a, member 5               | SMARCA5  | 700614    |
| SWI/SNF related, matrix associated, actin dependent regulator of chromatin, subfamily a-like 1                  | SMARCAL1 | 695741    |
| SWI/SNF related, matrix associated, actin dependent regulator of chromatin, subfamily b, member 1               | SMARCB1  | 699190    |
| SWI/SNF related, matrix associated, actin dependent regulator of chromatin, subfamily d, member 3               | SMARCD3  | 715080    |
| SWI/SNF related, matrix associated, actin dependent regulator of chromatin, subfamily e, member 1               | SMARCE1  | 701310    |
| SWI/SNF-related, matrix-associated actin-dependent regulator of chromatin, subfamily a, containing DEAD/H box 1 | SMARCAD1 | 708691    |
| SWIM-type zinc finger 7 associated protein 1                                                                    | SWSAP1   | 716529    |
| SWT1, RNA endoribonuclease homolog                                                                              | SWT1     | 714083    |
| SYF2 pre-mrna-splicing factor                                                                                   | SYF2     | 719564    |
| Symplekin                                                                                                       | SYMPK    | 722436    |
| Synaptogyrin 1                                                                                                  | SYNGR1   | 100427480 |
| Synaptogyrin 4                                                                                                  | SYNGR4   | 717913    |
| Synaptophysin-like 1                                                                                            | SYPL1    | 698350    |
| Synaptosome associated protein 47kda                                                                            | SNAP47   | 696700    |
| Synaptotagmin 6                                                                                                 | SYT6     | 708175    |
| Synaptotagmin binding, cytoplasmic RNA interacting protein                                                      | SYNCRIP  | 696756    |
| Synaptotagmin like 1                                                                                            | SYTL1    | 715833    |
| Synaptotagmin like 2                                                                                            | SYTL2    | 703187    |
| Synaptotagmin like 3                                                                                            | SYTL3    | 699497    |
| Syndecan 1                                                                                                      | SDC1     | 701544    |

|                                                                                             |          |        |
|---------------------------------------------------------------------------------------------|----------|--------|
| Syndecan binding protein                                                                    | SDCBP    | 698381 |
| Synergisin, gamma                                                                           | SYNRG    | 717750 |
| Synovial sarcoma translocation gene on chromosome 18-like 2                                 | SS18L2   | 716387 |
| Syntaxin 12                                                                                 | STX12    | 716455 |
| Syntaxin 18                                                                                 | STX18    | 712216 |
| Syntaxin 1B                                                                                 | STX1B    | 714251 |
| Syntaxin 5                                                                                  | STX5     | 718435 |
| Syntaxin 8                                                                                  | STX8     | 717678 |
| Syntaxin binding protein 6 (amisyn)                                                         | STXBP6   | 715357 |
| Syntrophin, beta 2 (dystrophin-associated protein A1, 59kda, basic component 2)             | SNTB2    | 704333 |
| Syntrophin, gamma 1                                                                         | SNTG1    | 709244 |
| Syntrophin, gamma 2                                                                         | SNTG2    | 706376 |
| Tafazzin                                                                                    | TAZ      | 574297 |
| TAM41, mitochondrial translocator assembly and maintenance protein, homolog (S. Cerevisiae) | C3orf31  | 695998 |
| TANK-binding kinase 1                                                                       | TBK1     | 717427 |
| Tankyrase, TRF1-interacting ankyrin-related ADP-ribose polymerase 2                         | TNKS2    | 698050 |
| TAO kinase 2                                                                                | TAOK2    | 707777 |
| TAR (HIV-1) RNA binding protein 1                                                           | TARBP1   | 712397 |
| TAR (HIV-1) RNA binding protein 2                                                           | TARBP2   | 703294 |
| Target of EGR1, member 1 (nuclear)                                                          | TOE1     | 705770 |
| TATA-box binding protein associated factor 1                                                | TAF1     | 698800 |
| TATA-box binding protein associated factor 10                                               | TAF10    | 710022 |
| TATA-box binding protein associated factor 11                                               | TAF11    | 718732 |
| TATA-box binding protein associated factor 12                                               | TAF12    | 717135 |
| TATA-box binding protein associated factor 2                                                | TAF2     | 702411 |
| TATA-box binding protein associated factor 5                                                | TAF5     | 714558 |
| TATA-box binding protein associated factor 5 like                                           | TAF5L    | 693770 |
| TATA-box binding protein associated factor 6 like                                           | TAF6L    | 722233 |
| TATA-box binding protein associated factor 7                                                | TAF7     | 574347 |
| TATA-box binding protein associated factor 9                                                | TAF9     | 700239 |
| TATA-box binding protein associated factor, RNA polymerase I, D                             | TAF1D    | 696602 |
| Tatd dnase domain containing 1                                                              | TATDN1   | 706095 |
| Tax1 (human T-cell leukemia virus type I) binding protein 1                                 | TAX1BP1  | 698103 |
| Tax1 (human T-cell leukemia virus type I) binding protein 3                                 | TAX1BP3  | 706829 |
| TBC1 domain family member 25                                                                | TBC1D25  | 710596 |
| TBC1 domain family member 4                                                                 | TBC1D4   | 696915 |
| TBC1 domain family member 9                                                                 | TBC1D9   | 702230 |
| T-box 2                                                                                     | TBX2     | 716277 |
| T-box 21                                                                                    | TBX21    | 694044 |
| T-box 3                                                                                     | TBX3     | 713740 |
| TCDD-inducible poly(ADP-ribose) polymerase                                                  | TIPARP   | 706180 |
| T-cell leukemia/lymphoma 1B                                                                 | TCL1B    | 703241 |
| TCF3 (E2A) fusion partner (in childhood Leukemia)                                           | TFPT     | 720296 |
| Tctex1 domain containing 2                                                                  | TCTEX1D2 | 711098 |
| TEA domain family member 4                                                                  | TEAD4    | 721772 |
| Teashirt zinc finger homeobox 1                                                             | TSHZ1    | 703018 |



|                                                                       |         |        |
|-----------------------------------------------------------------------|---------|--------|
| Tectonic family member 3                                              | TCTN3   | 703844 |
| Tektin 1                                                              | TEKT1   | 713555 |
| Tektin 3                                                              | TEKT3   | 693793 |
| TELO2 interacting protein 1                                           | TTI1    | 699930 |
| TELO2 interacting protein 2                                           | TTI2    | 696776 |
| Telomeric repeat binding factor 2, interacting protein                | TERF2IP | 712149 |
| Tensin 2                                                              | TNS2    | 700813 |
| TERF1 (TRF1)-interacting nuclear factor 2                             | TINF2   | 715812 |
| Testin LIM domain protein                                             | TES     | 706879 |
| Testis expressed 10                                                   | TEX10   | 714536 |
| Testis expressed 26                                                   | TEX26   | 713363 |
| Testis expressed 261                                                  | TEX261  | 703863 |
| Testis expressed 264                                                  | TEX264  | 700350 |
| Testis expressed 30                                                   | TEX30   | 701917 |
| Testis-specific kinase 1                                              | TESK1   | 697206 |
| Testis-specific kinase 2                                              | TESK2   | 705907 |
| Tetraspanin 15                                                        | TSPAN15 | 711675 |
| Tetraspanin 3                                                         | TSPAN3  | 708428 |
| Tetraspanin 5                                                         | TSPAN5  | 706537 |
| Tetraspanin 7                                                         | TSPAN7  | 698011 |
| Tetraspanin 8                                                         | TSPAN8  | 718622 |
| Tetratricopeptide repeat domain 1                                     | TTC1    | 695225 |
| Tetratricopeptide repeat domain 13                                    | TTC13   | 714027 |
| Tetratricopeptide repeat domain 14                                    | TTC14   | 710895 |
| Tetratricopeptide repeat domain 16                                    | TTC16   | 706784 |
| Tetratricopeptide repeat domain 21A                                   | TTC21A  | 694904 |
| Tetratricopeptide repeat domain 23                                    | TTC23   | 708530 |
| Tetratricopeptide repeat domain 26                                    | TTC26   | 715688 |
| Tetratricopeptide repeat domain 31                                    | TTC31   | 708810 |
| Tetratricopeptide repeat domain 32                                    | TTC32   | 700947 |
| Tetratricopeptide repeat domain 39C                                   | TTC39C  | 701560 |
| Tetratricopeptide repeat domain 7A                                    | TTC7A   | 715122 |
| Tetratricopeptide repeat domain 7B                                    | TTC7B   | 696029 |
| Tetratricopeptide repeat domain 8                                     | TTC8    | 694362 |
| Tetratricopeptide repeat domain 9C                                    | TTC9C   | 718583 |
| Tetratricopeptide repeat, ankyrin repeat and coiled-coil containing 1 | TANC1   | 699196 |
| TGF-beta activated kinase 1/MAP3K7 binding protein 1                  | TAB1    | 703409 |
| TGF-beta activated kinase 1/MAP3K7 binding protein 2                  | TAB2    | 696875 |
| THAP domain containing 10                                             | THAP10  | 696770 |
| THAP domain containing 11                                             | THAP11  | 700354 |
| THAP domain containing 4                                              | THAP4   | 701543 |
| THAP domain containing 6                                              | THAP6   | 701834 |
| THAP domain containing 7                                              | THAP7   | 696208 |
| Thiamine triphosphatase                                               | THTPA   | 714403 |
| Thiopurine S-methyltransferase                                        | TPMT    | 704564 |
| Thioredoxin                                                           | TXN     | 712587 |
| Thioredoxin domain containing 11                                      | TXNDC11 | 711826 |
| Thioredoxin domain containing 12 (endoplasmic reticulum)              | TXNDC12 | 712891 |

|                                                                            |         |           |
|----------------------------------------------------------------------------|---------|-----------|
| Thioredoxin domain containing 9                                            | TXNDC9  | 709303    |
| Thioredoxin like 1                                                         | TXNL1   | 695194    |
| Thioredoxin like 4A                                                        | TXNL4A  | 698969    |
| Thioredoxin reductase 1                                                    | TXNRD1  | 701062    |
| Thioredoxin reductase 2                                                    | TXNRD2  | 712475    |
| Thioredoxin-related transmembrane protein 1                                | TMX1    | 707057    |
| Thiosulfate sulfurtransferase (rhodanese)                                  | TST     | 698021    |
| THO complex 1                                                              | THOC1   | 697954    |
| THO complex 3                                                              | THOC3   | 695561    |
| THO complex 6                                                              | THOC6   | 700217    |
| Thrombospondin 3                                                           | THBS3   | 717572    |
| THUMP domain containing 2                                                  | THUMPD2 | 712045    |
| Thymocyte nuclear protein 1                                                | THYN1   | 700413    |
| Thymocyte selection associated high mobility group box                     | TOX     | 698759    |
| Thymopoietin                                                               | TMPO    | 693387    |
| Thymosin beta 10                                                           | TMSB10  | 694305    |
| Thymosin beta 4, X-linked                                                  | TMSB4X  | 710959    |
| Thyroid adenoma associated                                                 | THADA   | 716361    |
| Thyroid hormone receptor associated protein 3                              | THRAP3  | 713033    |
| Thyroid hormone receptor interactor 11                                     | TRIP11  | 697489    |
| Thyroid hormone receptor interactor 12                                     | TRIP12  | 710560    |
| Thyroid hormone receptor interactor 13                                     | TRIP13  | 709328    |
| Thyroid hormone receptor interactor 4                                      | TRIP4   | 707263    |
| TIA1 cytotoxic granule-associated RNA binding protein                      | TIA1    | 702366    |
| Tigger transposable element derived 2                                      | TIGD2   | 100427992 |
| TIMELESS interacting protein                                               | TIPIN   | 710328    |
| TIMP metalloproteinase inhibitor 1                                         | TIMP1   | 574348    |
| Tissue specific transplantation antigen P35B                               | TSTA3   | 698005    |
| Titin-cap                                                                  | TCAP    | 697327    |
| TLC domain containing 1                                                    | TLCD1   | 710391    |
| TM2 domain containing 2                                                    | TM2D2   | 701007    |
| TMEM9 domain family member B                                               | TMEM9B  | 708447    |
| TNF receptor associated factor 2                                           | TRAF2   | 708391    |
| TNF receptor associated factor 6                                           | TRAF6   | 716907    |
| TNF receptor associated factor 7                                           | TRAF7   | 695415    |
| TNF receptor-associated protein 1                                          | TRAP1   | 706234    |
| TNFRSF1A-associated via death domain                                       | TRADD   | 698160    |
| Tocopherol (alpha) transfer protein-like                                   | TTPAL   | 712620    |
| Toll-like receptor 9                                                       | TLR9    | 574395    |
| Topoisomerase (DNA) I                                                      | TOP1    | 697300    |
| Topoisomerase (DNA) II alpha                                               | TOP2A   | 700707    |
| Topoisomerase (DNA) II beta                                                | TOP2B   | 677709    |
| Topoisomerase (DNA) II binding protein 1                                   | TOPBP1  | 719054    |
| Topoisomerase (DNA) III beta                                               | TOP3B   | 698317    |
| Topoisomerase I binding, arginine/serine-rich, E3 ubiquitin protein ligase | TOPORS  | 703930    |
| Torsin family 1, member A (torsin A)                                       | TOR1A   | 722520    |
| Torsin family 2, member A                                                  | TOR2A   | 700203    |

|                                                                            |          |        |
|----------------------------------------------------------------------------|----------|--------|
| Torsin family 3, member A                                                  | TOR3A    | 717100 |
| TP53 induced glycolysis regulatory phosphatase                             | TIGAR    | 721886 |
| TPX2, microtubule-associated                                               | TPX2     | 712961 |
| TRAF family member associated NFkB activator                               | TANK     | 700942 |
| TRAF2 and NCK interacting kinase                                           | TNIK     | 695414 |
| TRAF3 interacting protein 2                                                | TRAF3IP2 | 697530 |
| Trafficking protein particle complex 1                                     | TRAPPC1  | 716622 |
| Trafficking protein particle complex 11                                    | TRAPPC11 | 702066 |
| Trafficking protein particle complex 3                                     | TRAPPC3  | 713705 |
| Trafficking protein particle complex 4                                     | TRAPPC4  | 702469 |
| Trafficking protein particle complex 6A                                    | TRAPPC6A | 713880 |
| Trafficking protein, kinesin binding 2                                     | TRAK2    | 701779 |
| TRAF-type zinc finger domain containing 1                                  | TRAFD1   | 711635 |
| Trans-2,3-enoyl-coa reductase                                              | TECR     | 718928 |
| Transaldolase 1                                                            | TALDO1   | 720828 |
| Transcription elongation factor A (SII), 2                                 | TCEA2    | 694026 |
| Transcription elongation factor A (SII)-like 1                             | TCEAL1   | 696826 |
| Transcription elongation factor A (SII)-like 2                             | TCEAL2   | 705419 |
| Transcription elongation factor A (SII)-like 4                             | TCEAL4   | 696453 |
| Transcription elongation factor A (SII)-like 7                             | TCEAL7   | 695831 |
| Transcription elongation factor A (SII)-like 8                             | TCEAL8   | 695496 |
| Transcription elongation factor B (SIII), polypeptide 1 (15kda, elongin C) | TCEB1    | 698922 |
| Transcription elongation regulator 1                                       | TCERG1   | 707912 |
| Transcription factor 4                                                     | TCF4     | 695814 |
| Transcription factor 7-like 1 (T-cell specific, HMG-box)                   | TCF7L1   | 694560 |
| Transcription factor A, mitochondrial                                      | TFAM     | 701368 |
| Transcription factor B1, mitochondrial                                     | TFB1M    | 701830 |
| Transcription factor CP2                                                   | TFCP2    | 574399 |
| Transcription factor Dp family member 3                                    | TFDP3    | 706557 |
| Transcription factor Dp-2 (E2F dimerization partner 2)                     | TFDP2    | 714655 |
| Transcription factor EC                                                    | TFEC     | 704124 |
| Transcriptional adaptor 3                                                  | TADA3    | 700090 |
| Transducer of ERBB2, 1                                                     | TOB1     | 706873 |
| Transducin (beta)-like 1 X-linked receptor 1                               | TBL1XR1  | 712740 |
| Transducin (beta)-like 2                                                   | TBL2     | 716515 |
| Transducin (beta)-like 3                                                   | TBL3     | 693864 |
| Transducin like enhancer of split 1                                        | TLE1     | 707336 |
| Transferrin receptor                                                       | TFRC     | 711568 |
| Transformer 2 alpha homolog (Drosophila)                                   | TRA2A    | 574247 |
| Transformer 2 beta homolog (Drosophila)                                    | TRA2B    | 574337 |
| Transforming growth factor beta 1 induced transcript 1                     | TGFB1I1  | 714172 |
| Transforming growth factor beta 2                                          | TGFB2    | 707540 |
| Transforming growth factor beta receptor II                                | TGFBR2   | 703088 |
| Transforming growth factor beta regulator 4                                | TBRG4    | 697717 |
| Transforming growth factor, beta receptor 1                                | TGFBR1   | 714952 |
| Transforming, acidic coiled-coil containing protein 2                      | TACC2    | 705497 |
| Transforming, acidic coiled-coil containing protein 3                      | TACC3    | 712898 |

|                                                                           |          |           |
|---------------------------------------------------------------------------|----------|-----------|
| Transgelin 2                                                              | TAGLN2   | 719527    |
| Transglutaminase 2                                                        | TGM2     | 706777    |
| Transglutaminase 7                                                        | TGM7     | 712676    |
| Transient receptor potential cation channel, subfamily V, member 4        | TRPV4    | 709605    |
| Translation machinery associated 7 homolog                                | TMA7     | 710220    |
| Translational activator of mitochondrially encoded cytochrome c oxidase I | TACO1    | 717828    |
| Translin-associated factor X interacting protein 1                        | TSNAXIP1 | 700095    |
| Translocase of inner mitochondrial membrane 10 homolog (yeast)            | TIMM10   | 705930    |
| Translocase of inner mitochondrial membrane 17 homolog A (yeast)          | TIMM17A  | 707001    |
| Translocase of inner mitochondrial membrane 17 homolog B (yeast)          | TIMM17B  | 714895    |
| Translocase of inner mitochondrial membrane 21 homolog (yeast)            | TIMM21   | 694581    |
| Translocase of inner mitochondrial membrane 23 homolog (yeast)            | TIMM23   | 709594    |
| Translocase of inner mitochondrial membrane 44 homolog (yeast)            | TIMM44   | 709800    |
| Translocase of inner mitochondrial membrane 8 homolog B (yeast)           | TIMM8B   | 711249    |
| Translocase of inner mitochondrial membrane domain containing 1           | TIMMDC1  | 712414    |
| Translocase of outer mitochondrial membrane 22 homolog (yeast)            | TOMM22   | 701286    |
| Translocase of outer mitochondrial membrane 40 homolog (yeast)            | TOMM40   | 713297    |
| Translocase of outer mitochondrial membrane 6 homolog (yeast)             | TOMM6    | 100423264 |
| Translocase of outer mitochondrial membrane 70 homolog A (S. Cerevisiae)  | TOMM70A  | 700347    |
| Translocated promoter region, nuclear basket protein                      | TPR      | 713910    |
| Translocator protein                                                      | TSPO     | 711717    |
| Translocator protein 2                                                    | TSPO2    | 719669    |
| Transmembrane 4 L six family member 1                                     | TM4SF1   | 711908    |
| Transmembrane 4 L six family member 5                                     | TM4SF5   | 709844    |
| Transmembrane 7 superfamily member 3                                      | TM7SF3   | 710602    |
| Transmembrane 9 superfamily member 1                                      | TM9SF1   | 715472    |
| Transmembrane 9 superfamily protein member 4                              | TM9SF4   | 712260    |
| Transmembrane and coiled-coil domain family 1                             | TMCC1    | 702576    |
| Transmembrane and coiled-coil domain family 3                             | TMCC3    | 716185    |
| Transmembrane and coiled-coil domains 4                                   | TMCO4    | 703851    |
| Transmembrane and ubiquitin-like domain containing 1                      | TMUB1    | 714606    |
| Transmembrane and ubiquitin-like domain containing 2                      | TMUB2    | 714541    |
| Transmembrane BAX inhibitor motif containing 6                            | TMBIM6   | 677702    |
| Transmembrane p24 trafficking protein 1                                   | TMED1    | 713618    |
| Transmembrane p24 trafficking protein 3                                   | TMED3    | 711993    |
| Transmembrane p24 trafficking protein 7                                   | TMED7    | 100533192 |
| Transmembrane phosphoinositide 3-phosphatase and tensin homolog 2         | TPTE2    | 704870    |
| Transmembrane protease, serine 13                                         | TMPRSS13 | 698586    |
| Transmembrane protein 101                                                 | TMEM101  | 714166    |
| Transmembrane protein 104                                                 | TMEM104  | 698592    |
| Transmembrane protein 106C                                                | TMEM106C | 704741    |
| Transmembrane protein 115                                                 | TMEM115  | 702164    |
| Transmembrane protein 121                                                 | TMEM121  | 700005    |
| Transmembrane protein 123                                                 | TMEM123  | 702833    |
| Transmembrane protein 126A                                                | TMEM126A | 702831    |

|                            |          |           |
|----------------------------|----------|-----------|
| Transmembrane protein 126B | TMEM126B | 702719    |
| Transmembrane protein 132A | TMEM132A | 695291    |
| Transmembrane protein 135  | TMEM135  | 704963    |
| Transmembrane protein 138  | TMEM138  | 693905    |
| Transmembrane protein 139  | TMEM139  | 704563    |
| Transmembrane protein 147  | TMEM147  | 709568    |
| Transmembrane protein 14A  | TMEM14A  | 708829    |
| Transmembrane protein 14C  | TMEM14C  | 697976    |
| Transmembrane protein 150A | TMEM150A | 696101    |
| Transmembrane protein 160  | TMEM160  | 716996    |
| Transmembrane protein 165  | TMEM165  | 696262    |
| Transmembrane protein 167A | TMEM167A | 712218    |
| Transmembrane protein 168  | TMEM168  | 702972    |
| Transmembrane protein 170A | TMEM170A | 100427224 |
| Transmembrane protein 171  | TMEM171  | 702863    |
| Transmembrane protein 177  | TMEM177  | 695399    |
| Transmembrane protein 179B | TMEM179B | 718518    |
| Transmembrane protein 183A | TMEM183A | 704195    |
| Transmembrane protein 185A | TMEM185A | 705538    |
| Transmembrane protein 187  | TMEM187  | 698397    |
| Transmembrane protein 189  | TMEM189  | 702250    |
| Transmembrane protein 192  | TMEM192  | 708459    |
| Transmembrane protein 199  | TMEM199  | 708298    |
| Transmembrane protein 203  | TMEM203  | 706164    |
| Transmembrane protein 204  | TMEM204  | 701926    |
| Transmembrane protein 205  | TMEM205  | 714330    |
| Transmembrane protein 208  | TMEM208  | 697228    |
| Transmembrane protein 216  | TMEM216  | 693655    |
| Transmembrane protein 218  | TMEM218  | 100430360 |
| Transmembrane protein 237  | TMEM237  | 702262    |
| Transmembrane protein 246  | TMEM246  | 713682    |
| Transmembrane protein 248  | TMEM248  | 695654    |
| Transmembrane protein 25   | TMEM25   | 700466    |
| Transmembrane protein 254  | TMEM254  | 701130    |
| Transmembrane protein 256  | TMEM256  | 715274    |
| Transmembrane protein 261  | TMEM261  | 716818    |
| Transmembrane protein 30A  | TMEM30A  | 717907    |
| Transmembrane protein 31   | TMEM31   | 100429776 |
| Transmembrane protein 39A  | TMEM39A  | 712208    |
| Transmembrane protein 39B  | TMEM39B  | 706700    |
| Transmembrane protein 41A  | TMEM41A  | 700975    |
| Transmembrane protein 42   | TMEM42   | 714654    |
| Transmembrane protein 45A  | TMEM45A  | 700594    |
| Transmembrane protein 5    | TMEM5    | 717102    |
| Transmembrane protein 50A  | TMEM50A  | 100424312 |
| Transmembrane protein 53   | TMEM53   | 705023    |
| Transmembrane protein 54   | TMEM54   | 710342    |
| Transmembrane protein 55A  | TMEM55A  | 696779    |

|                                                                        |         |           |
|------------------------------------------------------------------------|---------|-----------|
| Transmembrane protein 57                                               | TMEM57  | 654415    |
| Transmembrane protein 60                                               | TMEM60  | 693679    |
| Transmembrane protein 61                                               | TMEM61  | 717082    |
| Transmembrane protein 62                                               | TMEM62  | 709505    |
| Transmembrane protein 65                                               | TMEM65  | 705727    |
| Transmembrane protein 79                                               | TMEM79  | 718329    |
| Transmembrane protein 81                                               | TMEM81  | 699180    |
| Transmembrane protein 94                                               | TMEM94  | 702374    |
| Transmembrane protein with EGF-like and two follistatin-like domains 1 | TMEFF1  | 714325    |
| Transmembrane protein with EGF-like and two follistatin-like domains 2 | TMEFF2  | 694555    |
| Transmembrane protein, adipocyte associated 1                          | TPRA1   | 707221    |
| Transporter 1, ATP-binding cassette, sub-family B (MDR/TAP)            | TAP1    | 717726    |
| Transportin 2                                                          | TNPO2   | 717710    |
| Tribbles pseudokinase 2                                                | TRIB2   | 710966    |
| Tribbles pseudokinase 3                                                | TRIB3   | 714636    |
| Trinucleotide repeat containing 6A                                     | TNRC6A  | 701680    |
| Triokinase/FMN cyclase                                                 | TKFC    | 694117    |
| Triosephosphate isomerase 1                                            | TPI1    | 714090    |
| Tripartite motif containing 11                                         | TRIM11  | 694150    |
| Tripartite motif containing 22                                         | TRIM22  | 713814    |
| Tripartite motif containing 24                                         | TRIM24  | 710229    |
| Tripartite motif containing 27                                         | TRIM27  | 706129    |
| Tripartite motif containing 32                                         | TRIM32  | 702595    |
| Tripartite motif containing 33                                         | TRIM33  | 710600    |
| Tripartite motif containing 37                                         | TRIM37  | 710934    |
| Tripartite motif containing 41                                         | TRIM41  | 708426    |
| Tripartite motif containing 46                                         | TRIM46  | 717498    |
| Tripartite motif containing 47                                         | TRIM47  | 704642    |
| Tripartite motif containing 5                                          | TRIM5   | 574288    |
| Tripartite motif containing 6                                          | TRIM6   | 100428128 |
| Tripartite motif containing 8                                          | TRIM8   | 713701    |
| Tripartite motif family like 1                                         | TRIML1  | 698114    |
| TRK-fused gene                                                         | TFG     | 700972    |
| Trna 5-methylaminomethyl-2-thiouridylate methyltransferase             | TRMU    | 714268    |
| Trna isopentenyltransferase 1                                          | TRIT1   | 716422    |
| Trna methyltransferase 1                                               | TRMT1   | 718227    |
| Trna methyltransferase 11 homolog                                      | TRMT11  | 712712    |
| Trna methyltransferase 11-2 homolog (S. Cerevisiae)                    | TRMT112 | 717676    |
| Trna methyltransferase 6                                               | TRMT6   | 718229    |
| Trna methyltransferase 61B                                             | TRMT61B | 703419    |
| Trna methyltransferase O                                               | TRMO    | 715609    |
| Trna phosphotransferase 1                                              | TRPT1   | 717911    |
| Trna splicing endonuclease subunit 15                                  | TSEN15  | 717481    |
| Trna splicing endonuclease subunit 34                                  | TSEN34  | 693919    |
| Trna splicing endonuclease subunit 54                                  | TSEN54  | 702604    |
| Tropomodulin 3                                                         | TMOD3   | 694478    |
| Tropomodulin 4                                                         | TMOD4   | 709732    |
| Tropomyosin 1 (alpha)                                                  | TPM1    | 705236    |

|                                                          |          |           |
|----------------------------------------------------------|----------|-----------|
| Tropomyosin 2 (beta)                                     | TPM2     | 696604    |
| Tropomyosin 3                                            | TPM3     | 716336    |
| Troponin C type 2 (fast)                                 | TNNC2    | 717270    |
| TRPM8 channel-associated factor 1                        | TCAF1    | 705151    |
| Trub pseudouridine (psi) synthase family member 2        | TRUB2    | 717619    |
| Tryptase gamma 1                                         | TPSG1    | 100425752 |
| Tryptophanyl-trna synthetase                             | WARS     | 706855    |
| TSC22 domain family member 1                             | TSC22D1  | 701076    |
| TSC22 domain family member 3                             | TSC22D3  | 702656    |
| TSC22 domain family member 4                             | TSC22D4  | 719183    |
| TSPY-like 4                                              | TSPYL4   | 716137    |
| TSR1, 20S rRNA accumulation, homolog (S. Cerevisiae)     | TSR1     | 703311    |
| TSR3, 20S rRNA accumulation, homolog (S. Cerevisiae)     | TSR3     | 677691    |
| TSSK6 activating co-chaperone                            | TSACC    | 719490    |
| Tu translation elongation factor, mitochondrial          | TUFM     | 705462    |
| Tuberous sclerosis 2                                     | TSC2     | 694965    |
| Tubulin alpha 1a                                         | TUBA1A   | 574194    |
| Tubulin alpha 3c                                         | TUBA3C   | 707215    |
| Tubulin alpha 4a                                         | TUBA4A   | 702583    |
| Tubulin beta 4B class ivb                                | TUBB4B   | 100425864 |
| Tubulin beta class I                                     | TUBB     | 574113    |
| Tubulin folding cofactor C                               | TBCC     | 696997    |
| Tubulin folding cofactor E                               | TBCE     | 711476    |
| Tubulin gamma 1                                          | TUBG1    | 710756    |
| Tubulin polyglutamylase complex subunit 2                | TPGS2    | 709953    |
| Tubulin polymerization-promoting protein family member 3 | TPPP3    | 100429880 |
| Tubulin tyrosine ligase like 12                          | TTLL12   | 714871    |
| Tubulin, alpha 1b                                        | TUBA1B   | 709643    |
| Tudor domain containing 3                                | TDRD3    | 696228    |
| Tudor domain containing 6                                | TDRD6    | 704453    |
| Tuftelin interacting protein 11                          | TFIP11   | 712691    |
| Tumor necrosis factor (ligand) superfamily, member 12    | TNFSF12  | 100551504 |
| Tumor necrosis factor receptor superfamily member 25     | TNFRSF25 | 703744    |
| Tumor necrosis factor receptor superfamily, member 14    | TNFRSF14 | 695042    |
| Tumor necrosis factor superfamily member 13              | TNFSF13  | 100551504 |
| Tumor necrosis factor superfamily member 13b             | TNFSF13B | 693917    |
| Tumor necrosis factor superfamily member 4               | TNFSF4   | 706255    |
| Tumor protein D52-like 1                                 | TPD52L1  | 716568    |
| Tumor protein p53                                        | TP53     | 716170    |
| Tumor protein p53 binding protein 1                      | TP53BP1  | 710237    |
| Tumor protein p53 binding protein 2                      | TP53BP2  | 705383    |
| Tumor protein p53 inducible protein 3                    | TP53I3   | 704206    |
| Tumor protein p63                                        | TP63     | 703997    |
| Tumor protein, translationally-controlled 1              | TPT1     | 702155    |
| Tumor suppressing subtransferable candidate 1            | TSSC1    | 707650    |
| Tumor suppressing subtransferable candidate 4            | TSSC4    | 705185    |
| Tumor suppressor candidate 1                             | TUSC1    | 708101    |
| Tumor suppressor candidate 2                             | TUSC2    | 702614    |

|                                                                               |         |           |
|-------------------------------------------------------------------------------|---------|-----------|
| Tumor suppressor candidate 3                                                  | TUSC3   | 701123    |
| Twist family bhlh transcription factor 1                                      | TWIST1  | 574278    |
| Twist family bhlh transcription factor 2                                      | TWIST2  | 697078    |
| TWIST neighbor                                                                | TWISTNB | 707781    |
| Twisted gastrulation homolog 1 (Drosophila)                                   | TWSG1   | 705804    |
| TYRO3 protein tyrosine kinase                                                 | TYRO3   | 710902    |
| Tyrosine 3-monooxygenase/tryptophan 5-monooxygenase activation protein, beta  | YWHAB   | 717788    |
| Tyrosine 3-monooxygenase/tryptophan 5-monooxygenase activation protein, eta   | YWHAH   | 717016    |
| Tyrosine 3-monooxygenase/tryptophan 5-monooxygenase activation protein, gamma | YWHAG   | 715517    |
| Tyrosine hydroxylase                                                          | TH      | 721137    |
| Tyrosine kinase, non-receptor, 1                                              | TNK1    | 715180    |
| Tyrosine kinase, non-receptor, 2                                              | TNK2    | 711655    |
| Tyrosyl-DNA phosphodiesterase 2                                               | TDP2    | 715162    |
| Tyrosylprotein sulfotransferase 1                                             | TPST1   | 696626    |
| Tyrosyl-trna synthetase                                                       | YARS    | 709003    |
| U2AF homology motif (UHM) kinase 1                                            | UHMK1   | 720105    |
| UBA domain containing 2                                                       | UBAC2   | 703484    |
| Ubiquilin 1                                                                   | UBQLN1  | 713525    |
| Ubiquinol-cytochrome c reductase core protein I                               | UQCRC1  | 677864    |
| Ubiquinol-cytochrome c reductase core protein II                              | UQCRC2  | 697967    |
| Ubiquinol-cytochrome c reductase, 6.4kda subunit                              | UQCR    | 708396    |
| Ubiquinol-cytochrome c reductase, complex III subunit VII, 9.5kda             | UQCRQ   | 708950    |
| Ubiquitin A-52 residue ribosomal protein fusion product 1                     | UBA52   | 720243    |
| Ubiquitin B                                                                   | UBB     | 696110    |
| Ubiquitin conjugating enzyme E2 variant 1                                     | UBE2V1  | 100425552 |
| Ubiquitin conjugating enzyme E2A                                              | UBE2A   | 693716    |
| Ubiquitin conjugating enzyme E2D 1                                            | UBE2D1  | 701491    |
| Ubiquitin conjugating enzyme E2D 3                                            | UBE2D3  | 710772    |
| Ubiquitin conjugating enzyme E2D 4 (putative)                                 | UBE2D4  | 707831    |
| Ubiquitin conjugating enzyme E2E 3                                            | UBE2E3  | 704530    |
| Ubiquitin conjugating enzyme E2F (putative)                                   | UBE2F   | 695394    |
| Ubiquitin conjugating enzyme E2G 2                                            | UBE2G2  | 710862    |
| Ubiquitin conjugating enzyme E2H                                              | UBE2H   | 702056    |
| Ubiquitin conjugating enzyme E2I                                              | UBE2I   | 722434    |
| Ubiquitin conjugating enzyme E2L 3                                            | UBE2L3  | 697675    |
| Ubiquitin conjugating enzyme E2O                                              | UBE2O   | 710529    |
| Ubiquitin conjugating enzyme E2Q family member 1                              | UBE2Q1  | 718733    |
| Ubiquitin conjugating enzyme E2S                                              | UBE2S   | 700592    |
| Ubiquitin conjugating enzyme E2T                                              | UBE2T   | 705911    |
| Ubiquitin C-terminal hydrolase L1                                             | UCHL1   | 701579    |
| Ubiquitin C-terminal hydrolase L3                                             | UCHL3   | 697276    |
| Ubiquitin domain containing 2                                                 | UBTD2   | 709455    |
| Ubiquitin fusion degradation 1 like (yeast)                                   | UFD1L   | 711716    |
| Ubiquitin like 4A                                                             | UBL4A   | 700643    |
| Ubiquitin like 5                                                              | UBL5    | 711015    |



|                                                                    |           |           |
|--------------------------------------------------------------------|-----------|-----------|
| Ubiquitin like 7                                                   | UBL7      | 702305    |
| Ubiquitin like domain containing CTD phosphatase 1                 | UBLCP1    | 694476    |
| Ubiquitin protein ligase E3 component n-recognin 4                 | UBR4      | 702449    |
| Ubiquitin protein ligase E3 component n-recognin 7 (putative)      | UBR7      | 698882    |
| Ubiquitin protein ligase E3B                                       | UBE3B     | 707324    |
| Ubiquitin protein ligase E3D                                       | UBE3D     | 694910    |
| Ubiquitin related modifier 1                                       | URM1      | 722618    |
| Ubiquitin specific peptidase 10                                    | USP10     | 718471    |
| Ubiquitin specific peptidase 11                                    | USP11     | 706555    |
| Ubiquitin specific peptidase 13 (isopeptidase T-3)                 | USP13     | 708624    |
| Ubiquitin specific peptidase 14 (trna-guanine transglycosylase)    | USP14     | 698087    |
| Ubiquitin specific peptidase 15                                    | USP15     | 716793    |
| Ubiquitin specific peptidase 16                                    | USP16     | 706403    |
| Ubiquitin specific peptidase 18                                    | USP18     | 718792    |
| Ubiquitin specific peptidase 20                                    | USP20     | 716505    |
| Ubiquitin specific peptidase 21                                    | USP21     | 719894    |
| Ubiquitin specific peptidase 30                                    | USP30     | 706607    |
| Ubiquitin specific peptidase 38                                    | USP38     | 700235    |
| Ubiquitin specific peptidase 39                                    | USP39     | 696217    |
| Ubiquitin specific peptidase 47                                    | USP47     | 701660    |
| Ubiquitin specific peptidase 48                                    | USP48     | 707110    |
| Ubiquitin specific peptidase 7 (herpes virus-associated)           | USP7      | 714625    |
| Ubiquitin specific peptidase 8                                     | USP8      | 715523    |
| Ubiquitin specific peptidase 9, Y-linked                           | USP9Y     | 100270704 |
| Ubiquitination factor E4B                                          | UBE4B     | 713348    |
| Ubiquitin-conjugating enzyme E2E 2                                 | UBE2E2    | 699101    |
| Ubiquitin-fold modifier conjugating enzyme 1                       | UFC1      | 720277    |
| Ubiquitin-like modifier activating enzyme 1                        | UBA1      | 706324    |
| Ubiquitin-like modifier activating enzyme 2                        | UBA2      | 705808    |
| Ubiquitin-like modifier activating enzyme 3                        | UBA3      | 696493    |
| Ubiquitin-like modifier activating enzyme 7                        | UBA7      | 704875    |
| Ubiquitin-like with PHD and ring finger domains 1                  | UHRF1     | 695531    |
| U-box domain containing 5                                          | UBOX5     | 717166    |
| UBX domain protein 1                                               | UBXN1     | 718643    |
| UBX domain protein 10                                              | UBXN10    | 705058    |
| UBX domain protein 11                                              | UBXN11    | 719826    |
| UBX domain protein 6                                               | UBXN6     | 715070    |
| UDP-Gal:betaglcnaac beta 1,4- galactosyltransferase, polypeptide 1 | B4GALT1   | 703541    |
| UDP-Gal:betaglcnaac beta 1,4- galactosyltransferase, polypeptide 3 | B4GALT3   | 719920    |
| UDP-galactose-4-epimerase                                          | GALE      | 710553    |
| UDP-glcnaac:betagal beta-1,3-N-acetylglucosaminyltransferase 2     | B3GNT2    | 693396    |
| UDP-glcnaac:betagal beta-1,3-N-acetylglucosaminyltransferase 4     | B3GNT4    | 702023    |
| UDP-glcnaac:betagal beta-1,3-N-acetylglucosaminyltransferase 9     | B3GNT9    | 698037    |
| UDP-glucose ceramide glucosyltransferase                           | UGCG      | 707875    |
| UDP-N-acetylglucosamine pyrophosphorylase 1                        | UAP1      | 720116    |
| UHRF1 binding protein 1-like                                       | UHRF1BP1L | 694816    |
| Unc-5 family C-terminal like                                       | UNC5CL    | 719655    |
| Unc-51 like kinase 3                                               | ULK3      | 709530    |

|                                                                   |        |           |
|-------------------------------------------------------------------|--------|-----------|
| Unconventional SNARE in the ER 1 homolog ( <i>S. Cerevisiae</i> ) | USE1   | 718905    |
| UPF3 regulator of nonsense transcripts homolog B (yeast)          | UPF3B  | 694247    |
| Up-regulated during skeletal muscle growth 5 homolog (mouse)      | USMG5  | 100428448 |
| Upstream binding protein 1 (LBP-1a)                               | UBP1   | 706283    |
| Uracil DNA glycosylase                                            | UNG    | 706816    |
| Uracil phosphoribosyltransferase homolog                          | UPRT   | 704157    |
| Uridine monophosphate synthetase                                  | UMPS   | 715664    |
| Uridine-cytidine kinase 1                                         | UCK1   | 715417    |
| Uridine-cytidine kinase 1-like 1                                  | UCKL1  | 694692    |
| Uridine-cytidine kinase 2                                         | UCK2   | 695725    |
| Urocortin                                                         | UCN    | 699942    |
| Uronyl-2-sulfotransferase                                         | UST    | 697355    |
| Uroporphyrinogen III synthase                                     | UROS   | 696043    |
| Usher syndrome 1C                                                 | USH1C  | 696911    |
| USP6 N-terminal like                                              | USP6NL | 694275    |
| UTP14, U3 small nucleolar ribonucleoprotein, homolog C (yeast)    | UTP14C | 709657    |
| UTP20 small subunit processome component                          | UTP20  | 696472    |
| UTP23, small subunit processome component                         | UTP23  | 702915    |
| UTP6 small subunit processome component                           | UTP6   | 713361    |
| UV radiation resistance associated                                | UVRAG  | 696601    |
| Vac14 homolog ( <i>S. Cerevisiae</i> )                            | VAC14  | 708741    |
| Vaccinia related kinase 1                                         | VRK1   | 704798    |
| Vacuolar protein sorting 28 homolog ( <i>S. Cerevisiae</i> )      | VPS28  | 702412    |
| Vacuolar protein sorting 36 homolog ( <i>S. Cerevisiae</i> )      | VPS36  | 693290    |
| Vacuolar protein sorting 37 homolog C ( <i>S. Cerevisiae</i> )    | VPS37C | 694898    |
| Vacuolar protein sorting 4 homolog A ( <i>S. Cerevisiae</i> )     | VPS4A  | 705277    |
| Vacuolar protein sorting 45 homolog ( <i>S. Cerevisiae</i> )      | VPS45  | 706035    |
| Vacuolar protein sorting 72 homolog ( <i>S. Cerevisiae</i> )      | VPS72  | 709818    |
| V-akt murine thymoma viral oncogene homolog 3                     | AKT3   | 714717    |
| Valosin containing protein lysine (K) methyltransferase           | VCPKMT | 705487    |
| Valyl-trna synthetase                                             | VARS   | 715537    |
| Vascular endothelial growth factor A                              | VEGFA  | 574209    |
| Vav guanine nucleotide exchange factor 1                          | VAV1   | 100424248 |
| VCP-interacting membrane selenoprotein                            | VIMP   | 694752    |
| V-crk avian sarcoma virus CT10 oncogene homolog                   | CRK    | 701185    |
| Ventral anterior homeobox 2                                       | VAX2   | 703531    |
| Versican                                                          | VCAN   | 712365    |
| Very low density lipoprotein receptor                             | VLDLR  | 574284    |
| Vesicle (multivesicular body) trafficking 1                       | VTA1   | 701578    |
| Vesicle associated membrane protein 1                             | VAMP1  | 722049    |
| Vesicle associated membrane protein 2                             | VAMP2  | 574134    |
| Vesicle associated membrane protein 3                             | VAMP3  | 707972    |
| Vesicle associated membrane protein 5                             | VAMP5  | 695471    |
| Vesicle associated membrane protein 8                             | VAMP8  | 695851    |
| Vesicle transport through interaction with t-snares 1B            | VTI1B  | 711113    |
| Vestigial like family member 4                                    | VGLL4  | 699034    |
| Vezatin, adherens junctions transmembrane protein                 | VEZT   | 716675    |
| Vitamin K epoxide reductase complex subunit 1                     | VKORC1 | 714412    |

|                                                                                   |          |           |
|-----------------------------------------------------------------------------------|----------|-----------|
| Vitamin K epoxide reductase complex subunit 1 like 1                              | VKORC1L1 | 697591    |
| Vitelline membrane outer layer 1 homolog (chicken)                                | VMO1     | 709950    |
| Vitrin                                                                            | VIT      | 708384    |
| Vitronectin                                                                       | VTN      | 708499    |
| V-kit Hardy-Zuckerman 4 feline sarcoma viral oncogene homolog                     | KIT      | 696759    |
| V-myc avian myelocytomatosis viral oncogene homolog                               | MYC      | 694626    |
| V-myc avian myelocytomatosis viral oncogene neuroblastoma derived homolog         | MYCN     | 698699    |
| Voltage-dependent anion channel 1                                                 | VDAC1    | 710045    |
| Voltage-dependent anion channel 2                                                 | VDAC2    | 704257    |
| Von Willebrand factor A domain containing 5B1                                     | VWA5B1   | 717269    |
| Von Willebrand factor C and EGF domains                                           | VWCE     | 694385    |
| VPS11, CORVET/HOPS core subunit                                                   | VPS11    | 702834    |
| VPS16, CORVET/HOPS core subunit                                                   | VPS16    | 100426688 |
| VPS26 retromer complex component A                                                | VPS26A   | 717371    |
| VPS26 retromer complex component B                                                | VPS26B   | 694566    |
| VPS33B interacting protein, apical-basolateral polarity regulator, spe-39 homolog | VIPAS39  | 706315    |
| VPS39 HOPS complex subunit                                                        | VPS39    | 707791    |
| VPS52 GARP complex subunit                                                        | VPS52    | 100430904 |
| VPS54 GARP complex subunit                                                        | VPS54    | 695397    |
| VPS8, CORVET complex subunit                                                      | VPS8     | 701567    |
| V-ral simian leukemia viral oncogene homolog A (ras related)                      | RALA     | 703440    |
| V-ral simian leukemia viral oncogene homolog B                                    | RALB     | 695852    |
| V-set and immunoglobulin domain containing 2                                      | VSIG2    | 712047    |
| V-set and immunoglobulin domain containing 4                                      | VSIG4    | 709685    |
| WAP four-disulfide core domain 2                                                  | WFDC2    | 710469    |
| WAP four-disulfide core domain 3                                                  | WFDC3    | 709542    |
| WD repeat containing, antisense to TP53                                           | WRAP53   | 716125    |
| WD repeat domain 11                                                               | WDR11    | 714990    |
| WD repeat domain 12                                                               | WDR12    | 705623    |
| WD repeat domain 18                                                               | WDR18    | 704547    |
| WD repeat domain 19                                                               | WDR19    | 698866    |
| WD repeat domain 20                                                               | WDR20    | 708533    |
| WD repeat domain 26                                                               | WDR26    | 704911    |
| WD repeat domain 3                                                                | WDR3     | 711960    |
| WD repeat domain 35                                                               | WDR35    | 716638    |
| WD repeat domain 37                                                               | WDR37    | 709975    |
| WD repeat domain 4                                                                | WDR4     | 714230    |
| WD repeat domain 41                                                               | WDR41    | 708223    |
| WD repeat domain 44                                                               | WDR44    | 710598    |
| WD repeat domain 45                                                               | WDR45    | 715262    |
| WD repeat domain 47                                                               | WDR47    | 696942    |
| WD repeat domain 48                                                               | WDR48    | 695026    |
| WD repeat domain 53                                                               | WDR53    | 709710    |
| WD repeat domain 59                                                               | WDR59    | 710576    |
| WD repeat domain 6                                                                | WDR6     | 708505    |
| WD repeat domain 61                                                               | WDR61    | 709971    |

|                                                                        |         |        |
|------------------------------------------------------------------------|---------|--------|
| WD repeat domain 74                                                    | WDR74   | 718460 |
| WD repeat domain 75                                                    | WDR75   | 709104 |
| WD repeat domain 83 opposite strand                                    | WDR83OS | 716302 |
| WDYHV motif containing 1                                               | WDYHV1  | 704686 |
| WEE1 G2 checkpoint kinase                                              | WEE1    | 703760 |
| Werner helicase interacting protein 1                                  | WRNIP1  | 707250 |
| Williams-Beuren syndrome chromosome region 17                          | WBSCR17 | 695207 |
| Wilms tumor 1 associated protein                                       | WTAP    | 702295 |
| Wingless-type MMTV integration site family member 4                    | WNT4    | 707864 |
| Wiskott-Aldrich syndrome-like                                          | WASL    | 696556 |
| WNK lysine deficient protein kinase 3                                  | WNK3    | 701015 |
| WSC domain containing 1                                                | WSCD1   | 712488 |
| WW domain binding protein 1                                            | WBP1    | 709202 |
| WW domain binding protein 11                                           | WBP11   | 699451 |
| WW domain binding protein 2                                            | WBP2    | 704545 |
| WW domain binding protein 4                                            | WBP4    | 698220 |
| WW domain binding protein 5                                            | WBP5    | 696661 |
| WW domain containing adaptor with coiled-coil                          | WAC     | 715828 |
| WW domain containing E3 ubiquitin protein ligase 2                     | WWP2    | 705464 |
| X-box binding protein 1                                                | XBP1    | 713863 |
| Xeroderma pigmentosum, complementation group A                         | XPA     | 715705 |
| Xeroderma pigmentosum, complementation group C                         | XPC     | 700938 |
| X-prolyl aminopeptidase (aminopeptidase P) 1, soluble                  | XPNPEP1 | 696570 |
| X-ray repair complementing defective repair in Chinese hamster cells 5 | XRCC5   | 574279 |
| X-ray repair complementing defective repair in Chinese hamster cells 6 | XRCC6   | 707975 |
| Xylosylprotein beta 1,4-galactosyltransferase, polypeptide 7           | B4GALT7 | 701000 |
| Yae1 domain containing 1                                               | YAE1D1  | 703786 |
| Y-box binding protein 3                                                | YBX3    | 722347 |
| YEATS domain containing 4                                              | YEATS4  | 718376 |
| Yip1 domain family member 1                                            | YIPF1   | 714632 |
| Yip1 domain family member 2                                            | YIPF2   | 713753 |
| Yip1 domain family member 3                                            | YIPF3   | 700228 |
| Yip1 domain family member 4                                            | YIPF4   | 706819 |
| Yip1 interacting factor homolog A (S. Cerevisiae)                      | YIF1A   | 714486 |
| Yippee like 3                                                          | YPEL3   | 708740 |
| Yippee like 4                                                          | YPEL4   | 705186 |
| Yippee like 5                                                          | YPEL5   | 704532 |
| YKT6 v-SNARE homolog (S. Cerevisiae)                                   | YKT6    | 699606 |
| YTH domain containing 1                                                | YTHDC1  | 709717 |
| YTH N(6)-methyladenosine RNA binding protein 1                         | YTHDF1  | 697816 |
| YTH N(6)-methyladenosine RNA binding protein 2                         | YTHDF2  | 717225 |
| ZFP69 zinc finger protein                                              | ZFP69   | 694407 |
| Zinc binding alcohol dehydrogenase domain containing 2                 | ZADH2   | 701079 |
| Zinc finger (CCCH type), RNA binding motif and serine/arginine rich 2  | ZRSR2   | 720986 |
| Zinc finger and AT-hook domain containing                              | ZFAT    | 698512 |
| Zinc finger and BTB domain containing 2                                | ZBTB2   | 704782 |
| Zinc finger and BTB domain containing 20                               | ZBTB20  | 712238 |
| Zinc finger and BTB domain containing 33                               | ZBTB33  | 695801 |

|                                                         |         |           |
|---------------------------------------------------------|---------|-----------|
| Zinc finger and BTB domain containing 39                | ZBTB39  | 713914    |
| Zinc finger and BTB domain containing 40                | ZBTB40  | 708181    |
| Zinc finger and BTB domain containing 43                | ZBTB43  | 701797    |
| Zinc finger and BTB domain containing 48                | ZBTB48  | 704628    |
| Zinc finger and BTB domain containing 49                | ZBTB49  | 712422    |
| Zinc finger and BTB domain containing 5                 | ZBTB5   | 718482    |
| Zinc finger and BTB domain containing 7B                | ZBTB7B  | 719006    |
| Zinc finger and BTB domain containing 8 opposite strand | ZBTB8OS | 708590    |
| Zinc finger and SCAN domain containing 2                | ZSCAN2  | 695673    |
| Zinc finger and SCAN domain containing 21               | ZSCAN21 | 710501    |
| Zinc finger and SCAN domain containing 29               | ZSCAN29 | 710414    |
| Zinc finger and SCAN domain containing 5A               | ZSCAN5A | 705629    |
| Zinc finger and SCAN domain containing 9                | ZSCAN9  | 703493    |
| Zinc finger CCCH-type containing 11A                    | ZC3H11A | 701537    |
| Zinc finger CCCH-type containing 12A                    | ZC3H12A | 713604    |
| Zinc finger CCCH-type containing 15                     | ZC3H15  | 707648    |
| Zinc finger CCCH-type containing 3                      | ZC3H3   | 708584    |
| Zinc finger CCCH-type containing 7A                     | ZC3H7A  | 711984    |
| Zinc finger E-box binding homeobox 2                    | ZEB2    | 705439    |
| Zinc finger homeobox 3                                  | ZFHX3   | 706074    |
| Zinc finger protein 112                                 | ZNF112  | 713527    |
| Zinc finger protein 140                                 | ZNF140  | 695171    |
| Zinc finger protein 143                                 | ZNF143  | 703978    |
| Zinc finger protein 155                                 | ZNF155  | 712736    |
| Zinc finger protein 17                                  | ZNF17   | 707664    |
| Zinc finger protein 174                                 | ZNF174  | 702964    |
| Zinc finger protein 177                                 | ZNF177  | 709851    |
| Zinc finger protein 180                                 | ZNF180  | 712493    |
| Zinc finger protein 181                                 | ZNF181  | 106992424 |
| Zinc finger protein 195                                 | ZNF195  | 706915    |
| Zinc finger protein 202                                 | ZNF202  | 708814    |
| Zinc finger protein 207                                 | ZNF207  | 100689488 |
| Zinc finger protein 217                                 | ZNF217  | 699314    |
| Zinc finger protein 22                                  | ZNF22   | 706208    |
| Zinc finger protein 23                                  | ZNF23   | 710814    |
| Zinc finger protein 239                                 | ZNF239  | 717737    |
| Zinc finger protein 250                                 | ZNF250  | 704805    |
| Zinc finger protein 263                                 | ZNF263  | 702166    |
| Zinc finger protein 274                                 | ZNF274  | 712237    |
| Zinc finger protein 280D                                | ZNF280D | 699509    |
| Zinc finger protein 285                                 | ZNF285  | 106994792 |
| Zinc finger protein 296                                 | ZNF296  | 713620    |
| Zinc finger protein 304                                 | ZNF304  | 100428176 |
| Zinc finger protein 32                                  | ZNF32   | 705373    |
| Zinc finger protein 322                                 | ZNF322  | 701098    |
| Zinc finger protein 330                                 | ZNF330  | 699364    |
| Zinc finger protein 335                                 | ZNF335  | 708282    |
| Zinc finger protein 354B                                | ZNF354B | 712885    |

|                                                  |         |           |
|--------------------------------------------------|---------|-----------|
| Zinc finger protein 383                          | ZNF383  | 100425344 |
| Zinc finger protein 385A                         | ZNF385A | 705436    |
| Zinc finger protein 385B                         | ZNF385B | 704204    |
| Zinc finger protein 408                          | ZNF408  | 714213    |
| Zinc finger protein 41                           | ZNF41   | 706770    |
| Zinc finger protein 410                          | ZNF410  | 698124    |
| Zinc finger protein 423                          | ZNF423  | 693808    |
| Zinc finger protein 436                          | ZNF436  | 709638    |
| Zinc finger protein 462                          | ZNF462  | 711489    |
| Zinc finger protein 467                          | ZNF467  | 712106    |
| Zinc finger protein 484                          | ZNF484  | 711976    |
| Zinc finger protein 496                          | ZNF496  | 709694    |
| Zinc finger protein 513                          | ZNF513  | 700577    |
| Zinc finger protein 521                          | ZNF521  | 709169    |
| Zinc finger protein 524                          | ZNF524  | 701807    |
| Zinc finger protein 532                          | ZNF532  | 701146    |
| Zinc finger protein 543                          | ZNF543  | 100428080 |
| Zinc finger protein 549                          | ZNF549  | 708201    |
| Zinc finger protein 575                          | ZNF575  | 718118    |
| Zinc finger protein 576                          | ZNF576  | 710398    |
| Zinc finger protein 581                          | ZNF581  | 100428424 |
| Zinc finger protein 593                          | ZNF593  | 714086    |
| Zinc finger protein 599                          | ZNF599  | 706512    |
| Zinc finger protein 608                          | ZNF608  | 702182    |
| Zinc finger protein 613                          | ZNF613  | 719851    |
| Zinc finger protein 620                          | ZNF620  | 100423712 |
| Zinc finger protein 622                          | ZNF622  | 100429384 |
| Zinc finger protein 627                          | ZNF627  | 716820    |
| Zinc finger protein 646                          | ZNF646  | 712774    |
| Zinc finger protein 653                          | ZNF653  | 714754    |
| Zinc finger protein 664                          | ZNF664  | 710703    |
| Zinc finger protein 671                          | ZNF671  | 708932    |
| Zinc finger protein 684                          | ZNF684  | 695691    |
| Zinc finger protein 687                          | ZNF687  | 716590    |
| Zinc finger protein 688                          | ZNF688  | 100430424 |
| Zinc finger protein 692                          | ZNF692  | 710010    |
| Zinc finger protein 7                            | ZNF7    | 715735    |
| Zinc finger protein 777                          | ZNF777  | 711987    |
| Zinc finger protein 79                           | ZNF79   | 700961    |
| Zinc finger protein 821                          | ZNF821  | 707355    |
| Zinc finger protein 830                          | ZNF830  | 715130    |
| Zinc finger protein 84                           | ZNF84   | 694939    |
| Zinc finger protein 92                           | ZNF92   | 708683    |
| Zinc finger protein interacting with K protein 1 | ZIK1    | 708621    |
| Zinc finger RNA binding protein                  | ZFR     | 696882    |
| Zinc finger with UFM1-specific peptidase domain  | ZUFSP   | 718059    |
| Zinc finger, AN1-type domain 2A                  | ZFAND2A | 100426344 |
| Zinc finger, AN1-type domain 2B                  | ZFAND2B | 702027    |

|                                                |          |        |
|------------------------------------------------|----------|--------|
| Zinc finger, AN1-type domain 3                 | ZFAND3   | 719346 |
| Zinc finger, AN1-type domain 4                 | ZFAND4   | 708136 |
| Zinc finger, AN1-type domain 6                 | ZFAND6   | 717543 |
| Zinc finger, B-box domain containing           | ZBBX     | 700091 |
| Zinc finger, BED-type containing 2             | ZBED2    | 706929 |
| Zinc finger, BED-type containing 4             | ZBED4    | 715118 |
| Zinc finger, BED-type containing 9             | ZBED9    | 708122 |
| Zinc finger, C2HC-type containing 1A           | ZC2HC1A  | 698760 |
| Zinc finger, C2HC-type containing 1C           | ZC2HC1C  | 701845 |
| Zinc finger, C3H1-type containing              | ZFC3H1   | 718671 |
| Zinc finger, C3HC-type containing 1            | ZC3HC1   | 702173 |
| Zinc finger, C4H2 domain containing            | ZC4H2    | 708764 |
| Zinc finger, CCCH-type with G-patch domain     | ZGPAT    | 719499 |
| Zinc finger, CCHC domain containing 10         | ZCCHC10  | 709423 |
| Zinc finger, CCHC domain containing 11         | ZCCHC11  | 713406 |
| Zinc finger, CCHC domain containing 14         | ZCCHC14  | 703833 |
| Zinc finger, CCHC domain containing 17         | ZCCHC17  | 705172 |
| Zinc finger, CCHC domain containing 3          | ZCCHC3   | 714477 |
| Zinc finger, CCHC domain containing 7          | ZCCHC7   | 716658 |
| Zinc finger, CCHC domain containing 8          | ZCCHC8   | 702359 |
| Zinc finger, DHHC-type containing 12           | ZDHHC12  | 722606 |
| Zinc finger, DHHC-type containing 15           | ZDHHC15  | 704366 |
| Zinc finger, DHHC-type containing 16           | ZDHHC16  | 705982 |
| Zinc finger, DHHC-type containing 17           | ZDHHC17  | 693595 |
| Zinc finger, DHHC-type containing 2            | ZDHHC2   | 710001 |
| Zinc finger, DHHC-type containing 24           | ZDHHC24  | 713870 |
| Zinc finger, DHHC-type containing 5            | ZDHHC5   | 704863 |
| Zinc finger, DHHC-type containing 6            | ZDHHC6   | 696538 |
| Zinc finger, FYVE domain containing 16         | ZFYVE16  | 710872 |
| Zinc finger, FYVE domain containing 27         | ZFYVE27  | 707273 |
| Zinc finger, HIT-type containing 1             | ZNHIT1   | 714339 |
| Zinc finger, HIT-type containing 2             | ZNHIT2   | 716729 |
| Zinc finger, matrin-type 2                     | ZMAT2    | 697247 |
| Zinc finger, matrin-type 5                     | ZMAT5    | 715058 |
| Zinc finger, MYM-type 2                        | ZMYM2    | 721255 |
| Zinc finger, MYM-type 3                        | ZMYM3    | 697147 |
| Zinc finger, MYM-type 4                        | ZMYM4    | 712793 |
| Zinc finger, MYND-type containing 11           | ZMYND11  | 708761 |
| Zinc finger, RAN-binding domain containing 2   | ZRANB2   | 703513 |
| Zinc finger, SWIM-type containing 3            | ZSWIM3   | 708804 |
| Zinc finger, ZZ-type containing 3              | ZZZ3     | 706357 |
| Zinc finger, ZZ-type with EF-hand domain 1     | ZZEF1    | 721518 |
| Zinc metalloproteinase STE24                   | ZMPSTE24 | 693765 |
| Zinc ribbon domain containing 1                | ZNRD1    | 712151 |
| Zona pellucida glycoprotein 3 (sperm receptor) | ZP3      | 719925 |
| Zyg-11 related, cell cycle regulator           | ZER1     | 717262 |
| Zyxin                                          | ZYX      | 706407 |

### (3) Expressed in both groups 1b and 2b

|                                                                |          |        |
|----------------------------------------------------------------|----------|--------|
| Alpha-2-macroglobulin                                          | A2M      | 716834 |
| Alpha 1,4-galactosyltransferase                                | A4GALT   | 710998 |
| Aladin WD repeat nucleoporin                                   | AAAS     | 719095 |
| ATP binding cassette subfamily A member 1                      | ABCA1    | 716146 |
| ATP binding cassette subfamily A member 5                      | ABCA5    | 693795 |
| ATP binding cassette subfamily B member 7                      | ABCB7    | 704034 |
| ATP binding cassette subfamily E member 1                      | ABCE1    | 701945 |
| ATP binding cassette subfamily G member 2 (Junior blood group) | ABCG2    | 574307 |
| Abhydrolase domain containing 1                                | ABHD1    | 698700 |
| Abhydrolase domain containing 8                                | ABHD8    | 718980 |
| Abl-interactor 1                                               | ABI1     | 707698 |
| Abl-interactor 2                                               | ABI2     | 704956 |
| Actin binding LIM protein 1                                    | ABLIM1   | 698641 |
| Acetyl-coa acyltransferase 2                                   | ACAA2    | 709350 |
| Acetyl-coa carboxylase alpha                                   | ACACA    | 714218 |
| Acyl-coa dehydrogenase, C-4 to C-12 straight chain             | ACADM    | 705168 |
| Acetyl-coa acetyltransferase 1                                 | ACAT1    | 707653 |
| Acyl-coa binding domain containing 3                           | ACBD3    | 699311 |
| Acyl-coa binding domain containing 6                           | ACBD6    | 716418 |
| ATP citrate lyase                                              | ACLY     | 708501 |
| Aconitase 1                                                    | ACO1     | 705075 |
| Aconitase 2                                                    | ACO2     | 707441 |
| Acyl-coa oxidase 1, palmitoyl                                  | ACOX1    | 705197 |
| Acrosin binding protein                                        | ACRBP    | 713219 |
| Acrosomal vesicle protein 1                                    | ACRV1    | 713422 |
| Actin like 6B                                                  | ACTL6B   | 712643 |
| Actin like 7B                                                  | ACTL7B   | 710750 |
| ARP2 actin-related protein 2 homolog (yeast)                   | ACTR2    | 697080 |
| ARP5 actin-related protein 5 homolog (yeast)                   | ACTR5    | 698191 |
| Actin related protein T2                                       | ACTRT2   | 711475 |
| Activin A receptor type I                                      | ACVR1    | 697935 |
| Activin A receptor type IB                                     | ACVR1B   | 696587 |
| Activin A receptor type IL                                     | ACVRL1   | 696471 |
| Aminoacylase 3                                                 | ACY3     | 711083 |
| ADAM metalloproteinase domain 19                               | ADAM19   | 715164 |
| ADAM metalloproteinase domain 21                               | ADAM21   | 715640 |
| ADAM metalloproteinase with thrombospondin type 1 motif 14     | ADAMTS14 | 710154 |
| ADAM metalloproteinase with thrombospondin type 1 motif 16     | ADAMTS16 | 694474 |
| ADAM metalloproteinase with thrombospondin type 1 motif 17     | ADAMTS17 | 693447 |
| ADAM metalloproteinase with thrombospondin type 1 motif 6      | ADAMTS6  | 696021 |
| ADAM metalloproteinase with thrombospondin type 1 motif 9      | ADAMTS9  | 698341 |
| ADAMTS like 2                                                  | ADAMTSL2 | 713492 |
| Adenosine deaminase, RNA-specific, B1                          | ADARB1   | 722016 |
| Adenosine deaminase, trna-specific 1                           | ADAT1    | 712066 |
| Aarf domain containing kinase 1                                | ADCK1    | 707060 |



|                                                                                                                        |          |           |
|------------------------------------------------------------------------------------------------------------------------|----------|-----------|
| Aarf domain containing kinase 3                                                                                        | ADCK3    | 697920    |
| Adenylate cyclase 4                                                                                                    | ADCY4    | 714684    |
| Adenylate cyclase 6                                                                                                    | ADCY6    | 707978    |
| Adducin 1                                                                                                              | ADD1     | 700805    |
| Adducin 3                                                                                                              | ADD3     | 677712    |
| Adhesion G protein-coupled receptor A3                                                                                 | ADGRA3   | 715618    |
| Adiponectin receptor 2                                                                                                 | ADIPOR2  | 707547    |
| Adenosine A3 receptor                                                                                                  | ADORA3   | 704295    |
| ADP-ribosylhydrolase like 2                                                                                            | ADPRHL2  | 712758    |
| Adenylosuccinate synthase                                                                                              | ADSS     | 713580    |
| Amino-terminal enhancer of split                                                                                       | AES      | 712353    |
| Aftiphilin                                                                                                             | AFTPH    | 696100    |
| 1-acylglycerol-3-phosphate O-acyltransferase 1                                                                         | AGPAT1   | 717174    |
| 1-acylglycerol-3-phosphate O-acyltransferase 5                                                                         | AGPAT5   | 716847    |
| Angiotensin II receptor-associated protein                                                                             | AGTRAP   | 722746    |
| AT-hook containing transcription factor 1                                                                              | AHCTF1   | 702705    |
| AHA1, activator of heat shock 90kda protein ATPase homolog 1 (yeast)                                                   | AHSA1    | 706547    |
| Alpha hemoglobin stabilizing protein                                                                                   | AHSP     | 714392    |
| Apoptosis inducing factor, mitochondria associated 1                                                                   | AIFM1    | 702773    |
| Apoptosis inducing factor, mitochondria associated 3                                                                   | AIFM3    | 100430576 |
| Androgen-induced 1                                                                                                     | AIG1     | 700988    |
| Ajuba LIM protein                                                                                                      | AJUBA    | 712865    |
| Adenylate kinase 2                                                                                                     | AK2      | 709737    |
| Adenylate kinase 3                                                                                                     | AK3      | 694714    |
| Adenylate kinase 8                                                                                                     | AK8      | 714698    |
| A-kinase anchoring protein 9                                                                                           | AKAP9    | 702970    |
| Aldo-keto reductase family 1, member B1 (aldose reductase)                                                             | AKR1B1   | 705957    |
| Aldo-keto reductase family 1, member C1 (dihydrodiol dehydrogenase 1; 20-alpha (3-alpha)-hydroxysteroid dehydrogenase) | AKR1C1   | 711198    |
| V-akt murine thymoma viral oncogene homolog 3                                                                          | AKT3     | 714717    |
| Aldehyde dehydrogenase 18 family member A1                                                                             | ALDH18A1 | 703357    |
| ALG2, alpha-1,3/1,6-mannosyltransferase                                                                                | ALG2     | 714850    |
| ALG5, dolichyl-phosphate beta-glucosyltransferase                                                                      | ALG5     | 694836    |
| Alkb homolog 4, lysine demethylase                                                                                     | ALKBH4   | 715078    |
| Alkb homolog 7                                                                                                         | ALKBH7   | 699343    |
| Arachidonate 5-lipoxygenase-activating protein                                                                         | ALOX5AP  | 713170    |
| Alpha kinase 1                                                                                                         | ALPK1    | 700993    |
| Alpha-methylacyl-coa racemase                                                                                          | AMACR    | 698365    |
| Autophagy/beclin-1 regulator 1                                                                                         | AMBRA1   | 714434    |
| Adhesion molecule with Ig-like domain 2                                                                                | AMIGO2   | 705386    |
| Adhesion molecule with Ig-like domain 3                                                                                | AMIGO3   | 705693    |
| Adenosine monophosphate deaminase 2                                                                                    | AMPD2    | 699561    |
| Amylase, alpha 2B (pancreatic)                                                                                         | AMY2B    | 712893    |
| Anaphase promoting complex subunit 15                                                                                  | ANAPC15  | 718333    |
| Anaphase promoting complex subunit 2                                                                                   | ANAPC2   | 706384    |
| Anaphase promoting complex subunit 4                                                                                   | ANAPC4   | 694006    |

|                                                                        |          |        |
|------------------------------------------------------------------------|----------|--------|
| Angiopoietin like 5                                                    | ANGPTL5  | 702036 |
| Ankyrin 3, node of Ranvier (ankyrin G)                                 | ANK3     | 699518 |
| Ankyrin repeat and IBR domain containing 1                             | ANKIB1   | 703273 |
| Ankyrin repeat and MYND domain containing 2                            | ANKMY2   | 709414 |
| Ankyrin repeat domain 2 (stretch responsive muscle)                    | ANKRD2   | 707097 |
| Ankyrin repeat domain 27                                               | ANKRD27  | 716232 |
| Ankyrin repeat domain 46                                               | ANKRD46  | 705491 |
| Ankyrin repeat domain 50                                               | ANKRD50  | 709327 |
| Ankyrin repeat domain 6                                                | ANKRD6   | 701339 |
| Anoctamin 3                                                            | ANO3     | 700072 |
| Acidic nuclear phosphoprotein 32 family member B                       | ANP32B   | 715508 |
| Annexin A1                                                             | ANXA1    | 702946 |
| Annexin A11                                                            | ANXA11   | 707628 |
| Annexin A3                                                             | ANXA3    | 697239 |
| Annexin A7                                                             | ANXA7    | 707166 |
| Acyloxyacyl hydrolase                                                  | AOAH     | 706291 |
| Adaptor related protein complex 1 associated regulatory protein        | AP1AR    | 700734 |
| Adaptor related protein complex 3, beta 2 subunit                      | AP3B2    | 694091 |
| Adaptor related protein complex 3, mu 1 subunit                        | AP3M1    | 705729 |
| Adaptor related protein complex 3, sigma 1 subunit                     | AP3S1    | 696644 |
| Adaptor related protein complex 4, beta 1 subunit                      | AP4B1    | 707634 |
| Adaptor related protein complex 5, beta 1 subunit                      | AP5B1    | 721904 |
| Amyloid beta (A4) precursor protein-binding, family B, member 1 (Fe65) | APBB1    | 712585 |
| Amyloid beta (A4) precursor protein-binding, family B, member 3        | APBB3    | 698296 |
| APEX nuclease (multifunctional DNA repair enzyme) 1                    | APEX1    | 702757 |
| Apoptosis inhibitor 5                                                  | API5     | 716346 |
| Apelin receptor                                                        | APLNR    | 706823 |
| Apolipoprotein A-II                                                    | APOA2    | 719946 |
| Apolipoprotein B mrna editing enzyme, catalytic poly peptide-like 3G   | APOBEC3G | 574398 |
| Apolipoprotein B mrna editing enzyme, catalytic poly peptide-like 3H   | APOBEC3H | 723811 |
| Apolipoprotein L4                                                      | APOL4    | 694250 |
| Apolipoprotein O                                                       | APOO     | 698137 |
| Arfgap with rhogap domain, ankyrin repeat and PH domain 2              | ARAP2    | 702115 |
| ADP ribosylation factor 3                                              | ARF3     | 708716 |
| ADP ribosylation factor 4                                              | ARF4     | 703432 |
| ADP ribosylation factor guanine nucleotide exchange factor 1           | ARFGEF1  | 704359 |
| Arginine and glutamate rich 1                                          | ARGLU1   | 702840 |
| Rho gtpase activating protein 18                                       | ARHGAP18 | 711107 |
| Rho gtpase activating protein 25                                       | ARHGAP25 | 699828 |
| Rho gtpase activating protein 29                                       | ARHGAP29 | 708896 |
| Rho gtpase activating protein 30                                       | ARHGAP30 | 718236 |
| Rho gtpase activating protein 6                                        | ARHGAP6  | 709978 |
| Rho gtpase activating protein 9                                        | ARHGAP9  | 711684 |
| Rho guanine nucleotide exchange factor 1                               | ARHGEF1  | 722198 |
| Rho guanine nucleotide exchange factor 10                              | ARHGEF10 | 722745 |

|                                                                                                      |         |           |
|------------------------------------------------------------------------------------------------------|---------|-----------|
| Rho guanine nucleotide exchange factor (GEF) 3                                                       | ARHGEF3 | 704764    |
| AT-rich interaction domain 4B                                                                        | ARID4B  | 718320    |
| ADP ribosylation factor like gtpase 6 interacting protein 5                                          | ARL6IP5 | 696360    |
| Armadillo repeat containing 2                                                                        | ARMC2   | 700364    |
| Armadillo repeat containing 9                                                                        | ARMC9   | 711891    |
| Armadillo repeat containing, X-linked 2                                                              | ARMCX2  | 704263    |
| Acidic residue methyltransferase 1                                                                   | ARMT1   | 704570    |
| Aryl hydrocarbon receptor nuclear translocator like                                                  | ARNTL   | 700464    |
| Actin related protein 2/3 complex subunit 1A                                                         | ARPC1A  | 718635    |
| Actin related protein 2/3 complex subunit 2                                                          | ARPC2   | 700536    |
| Actin related protein 2/3 complex subunit 3                                                          | ARPC3   | 709199    |
| Arrestin, beta 2                                                                                     | ARRB2   | 709399    |
| Arrestin domain containing 3                                                                         | ARRDC3  | 695903    |
| Arrestin domain containing 4                                                                         | ARRDC4  | 708023    |
| Artemin                                                                                              | ARTN    | 701641    |
| ARV1 homolog, fatty acid homeostasis modulator                                                       | ARV1    | 713975    |
| Armadillo repeat gene deleted in velocardiofacial syndrome                                           | ARVCF   | 712399    |
| Arfgap with SH3 domain, ankyrin repeat and PH domain 1                                               | ASAP1   | 695681    |
| Activating signal cointegrator 1 complex subunit 2                                                   | ASCC2   | 715117    |
| Acid sensing ion channel subunit 3                                                                   | ASIC3   | 714396    |
| Aspartate beta-hydroxylase domain containing 2                                                       | ASPHD2  | 712623    |
| Asteroid homolog 1 (Drosophila)                                                                      | ASTE1   | 719271    |
| Additional sex combs like 2, transcriptional regulator                                               | ASXL2   | 695057    |
| Arginyltransferase 1                                                                                 | ATE1    | 705248    |
| Activating transcription factor 4                                                                    | ATF4    | 703965    |
| Activating transcription factor 6                                                                    | ATF6    | 720056    |
| Autophagy related 16 like 1                                                                          | ATG16L1 | 714092    |
| Autophagy related 2A                                                                                 | ATG2A   | 717290    |
| Autophagy related 3                                                                                  | ATG3    | 708305    |
| Autophagy related 4A, cysteine peptidase                                                             | ATG4A   | 703367    |
| Autophagy related 4D, cysteine peptidase                                                             | ATG4D   | 713111    |
| Autophagy related 5                                                                                  | ATG5    | 696874    |
| Autophagy related 7                                                                                  | ATG7    | 696238    |
| 5-aminoimidazole-4-carboxamide ribonucleotide formyl transferase/IMP cyclohydrolase                  | ATIC    | 694819    |
| ATPase type 13A1                                                                                     | ATP13A1 | 100427504 |
| ATPase type 13A2                                                                                     | ATP13A2 | 699678    |
| ATPase, Na <sup>+</sup> /K <sup>+</sup> transporting, alpha 1 polypeptide                            | ATP1A1  | 710368    |
| ATPase, Na <sup>+</sup> /K <sup>+</sup> transporting, alpha 3 polypeptide                            | ATP1A3  | 706513    |
| ATPase, Ca <sup>++</sup> transporting, plasma membrane 1                                             | ATP2B1  | 709102    |
| ATPase, Ca <sup>++</sup> transporting, type 2C, member 1                                             | ATP2C1  | 719281    |
| ATPase, H <sup>+</sup> /K <sup>+</sup> exchanging, alpha polypeptide                                 | ATP4A   | 100426216 |
| ATP synthase, H <sup>+</sup> transporting, mitochondrial F1 complex, alpha subunit 1, cardiac muscle | ATP5A1  | 701389    |
| ATP synthase, H <sup>+</sup> transporting, mitochondrial F1 complex, beta polypeptide                | ATP5B   | 713284    |
| ATP synthase, H <sup>+</sup> transporting, mitochondrial F1 complex, gamma polypeptide 1             | ATP5C1  | 713768    |

|                                                                                |          |         |
|--------------------------------------------------------------------------------|----------|---------|
| ATP synthase, H <sup>+</sup> transporting, mitochondrial Fo complex subunit D  | ATP5H    | 700338  |
| ATP synthase, H <sup>+</sup> transporting, mitochondrial Fo complex subunit F6 | ATP5J    | 708411  |
| ATP synthase, H <sup>+</sup> transporting, mitochondrial F1 complex, O subunit | ATP5O    | 698480  |
| ATP synthase F0 subunit 6                                                      | ATP6     | 2846629 |
| ATPase, H <sup>+</sup> transporting, lysosomal accessory protein 2             | ATP6AP2  | 705048  |
| ATPase, H <sup>+</sup> transporting, lysosomal 9kda, V0 subunit e1             | ATP6V0E1 | 703342  |
| ATPase, H <sup>+</sup> transporting, lysosomal 31kda, V1 subunit E1            | ATP6V1E1 | 709739  |
| ATPase, H <sup>+</sup> transporting, lysosomal 14kda, V1 subunit F             | ATP6V1F  | 702112  |
| ATPase, class II, type 9A                                                      | ATP9A    | 710250  |
| ATPase inhibitory factor 1                                                     | ATPIF1   | 716870  |
| ATR serine/threonine kinase                                                    | ATR      | 714443  |
| All-trans retinoic acid induced differentiation factor                         | ATRAID   | 699201  |
| Alpha thalassemia/mental retardation syndrome X-linked                         | ATRX     | 705735  |
| Ataxin 2-like                                                                  | ATXN2L   | 708359  |
| AU RNA binding protein/enoyl-coa hydratase                                     | AUH      | 704542  |
| Ancient ubiquitous protein 1                                                   | AUP1     | 710020  |
| Aurora kinase B                                                                | AURKB    | 721955  |
| Apoptosis, caspase activation inhibitor                                        | AVEN     | 695227  |
| Alpha-2-glycoprotein 1, zinc-binding                                           | AZGP1    | 710136  |
| Beta-2-microglobulin                                                           | B2M      | 712428  |
| Beta-1,3-N-acetylgalactosaminyltransferase 1 (globoside blood group)           | B3GALNT1 | 703939  |
| Beta-1,3-glucuronyltransferase 2                                               | B3GAT2   | 717157  |
| Beta 3-glucosyltransferase                                                     | B3GLCT   | 713498  |
| UDP-glcna:betagal beta-1,3-N-acetylglucosaminyltransferase 2                   | B3GNT2   | 693396  |
| Beta-1,4-N-acetyl-galactosaminyl transferase 3                                 | B4GALNT3 | 706259  |
| UDP-Gal:betaglcna beta 1,4- galactosyltransferase, poly peptide 1              | B4GALT1  | 703541  |
| UDP-Gal:betaglcna beta 1,4- galactosyltransferase, poly peptide 6              | B4GALT6  | 706068  |
| B9 protein domain 2                                                            | B9D2     | 704873  |
| BRISC and BRCA1 A complex member 1                                             | BABAM1   | 718969  |
| Beta-site APP-cleaving enzyme 1                                                | BACE1    | 697694  |
| BTB and CNC homology 1, basic leucine zipper transcription factor 1            | BACH1    | 705817  |
| BCL2 associated athanogene 2                                                   | BAG2     | 712778  |
| BCL2 associated athanogene 4                                                   | BAG4     | 703953  |
| Bromo adjacent homology domain containing 1                                    | BAHD1    | 702982  |
| BAI1-associated protein 2-like 2                                               | BAIAP2L2 | 700058  |
| B-cell scaffold protein with ankyrin repeats 1                                 | BANK1    | 710040  |
| BTG3 associated nuclear protein                                                | BANP     | 696125  |
| BRCA1 associated RING domain 1                                                 | BARD1    | 694301  |
| Barh-like homeobox 2                                                           | BARHL2   | 696831  |
| BCL2-associated X protein                                                      | BAX      | 718948  |
| Bromodomain adjacent to zinc finger domain 1B                                  | BAZ1B    | 716436  |

|                                                             |             |        |
|-------------------------------------------------------------|-------------|--------|
| Bardet-Biedl syndrome 4                                     | BBS4        | 704508 |
| Bardet-Biedl syndrome 5                                     | BBS5        | 709701 |
| Breast cancer anti-estrogen resistance 1                    | BCAR1       | 713965 |
| Branched chain amino-acid transaminase 2, mitochondrial     | BCAT2       | 718305 |
| Branched chain keto acid dehydrogenase E1, beta polypeptide | BCKDHB      | 718472 |
| B-cell CLL/lymphoma 11B (zinc finger protein)               | BCL11B      | 705238 |
| B-cell CLL/lymphoma 6                                       | BCL6        | 708736 |
| B-cell CLL/lymphoma 9                                       | BCL9        | 700800 |
| Beta-carotene oxygenase 2                                   | BCO2        | 712095 |
| BCS1-like (S. Cerevisiae)                                   | BCS1L       | 699690 |
| Beclin 1, autophagy related                                 | BECN1       | 711649 |
| BEN domain containing 6                                     | BEND6       | 712498 |
| Bicaudal D homolog 2 (Drosophila)                           | BICD2       | 706621 |
| Bloom syndrome, recq helicase-like                          | BLM         | 703460 |
| Bone morphogenetic protein 1                                | BMP1        | 707596 |
| Bone morphogenetic protein receptor type IA                 | BMPR1A      | 696898 |
| BCL2/adenovirus E1B 19kda interacting protein 1             | BNIP1       | 703576 |
| BCL2/adenovirus E1B 19kda interacting protein 2             | BNIP2       | 703234 |
| Bola family member 1                                        | BOLA1       | 705297 |
| BLOC-1 related complex subunit 5                            | BORCS5      | 696469 |
| Bisphosphoglycerate mutase                                  | BPGM        | 706741 |
| BPI fold containing family A member 2                       | BPIFA2      | 710376 |
| Bromodomain containing 1                                    | BRD1        | 715059 |
| Bromodomain containing 2                                    | BRD2        | 717893 |
| Bromodomain containing 7                                    | BRD7        | 694850 |
| Brain protein I3                                            | BRI3        | 706525 |
| BRICHOS domain containing 5                                 | BRICD5      | 695765 |
| BTB (POZ) domain containing 1                               | BTBD1       | 718696 |
| BTB (POZ) domain containing 16                              | BTBD16      | 705610 |
| BTB (POZ) domain containing 9                               | BTBD9       | 719457 |
| Basic transcription factor 3                                | BTF3        | 703339 |
| B-cell translocation gene 1, anti-proliferative             | BTG1        | 710112 |
| BUB3 mitotic checkpoint protein                             | BUB3        | 708033 |
| BUD31 homolog                                               | BUD31       | 718694 |
| Bystin like                                                 | BYSL        | 694976 |
| Basic leucine zipper and W2 domains 2                       | BZW2        | 714627 |
| Chromosome 20 open reading frame 24 ortholog                | C10H20orf24 | 709696 |
| Chromosome 11 open reading frame, human c12orf4             | C11H12orf4  | 710836 |
| Chromosome 11 open reading frame, human c12orf57            | C11H12orf57 | 714482 |
| Chromosome 12 open reading frame, human c2orf47             | C12H2orf47  | 699322 |
| Chromosome 13 open reading frame, human c2orf49             | C13H2orf49  | 713165 |
| Chromosome 14 open reading frame, human c11orf58            | C14H11orf58 | 697690 |
| Chromosome 14 open reading frame, human c11orf73            | C14H11orf73 | 704098 |
| Chromosome 14 open reading frame, human c11orf74            | C14H11orf74 | 716798 |
| Chromosome 14 open reading frame, human c11orf87            | C14H11orf87 | 708608 |
| Chromosome 15 open reading frame, human c9orf135            | C15H9orf135 | 700202 |
| Chromosome 15 open reading frame, human c9orf16             | C15H9orf16  | 722628 |
| Chromosome 18 open reading frame, human c18orf21            | C18H18orf21 | 715440 |

|                                                                                             |             |           |
|---------------------------------------------------------------------------------------------|-------------|-----------|
| Chromosome 19 open reading frame, human c19orf24                                            | C19H19orf24 | 706393    |
| Chromosome 19 open reading frame, human c19orf53                                            | C19H19orf53 | 720745    |
| C1GALT1 specific chaperone 1                                                                | C1GALT1C1   | 696662    |
| Chromosome 1 open reading frame, human c1orf123                                             | C1H1orf123  | 714201    |
| Chromosome 1 open reading frame, human c1orf198                                             | C1H1orf198  | 714084    |
| Protein odr-4 homolog                                                                       | C1H1orf27   | 713801    |
| Chromosome 1 open reading frame, human c1orf50                                              | C1H1orf50   | 698058    |
| Chromosome 1 open reading frame, human c1orf52                                              | C1H1orf52   | 711232    |
| Chromosome 1 open reading frame, human c1orf54                                              | C1H1orf54   | 107000832 |
| Complement component 1, q subcomponent binding protein                                      | C1QBP       | 711817    |
| Complement component 1, q subcomponent, C chain                                             | C1QC        | 708589    |
| Complement component 1, q subcomponent-like 1                                               | C1QL1       | 715801    |
| Complement component 1, q subcomponent-like 2                                               | C1QL2       | 697776    |
| Complement component 1, s subcomponent                                                      | C1S         | 714589    |
| Chromosome 20 open reading frame, human c16orf78                                            | C20H16orf78 | 693672    |
| C2CD2-like                                                                                  | C2CD2L      | 703424    |
| Chromosome 2 open reading frame, human c3orf14                                              | C2H3orf14   | 699965    |
| Chromosome 2 open reading frame, human c3orf58                                              | C2H3orf58   | 713830    |
| Chromosome 3 open reading frame, human c21orf91                                             | C3H21orf91  | 710406    |
| Chromosome 3 open reading frame, human c7orf25                                              | C3H7orf25   | 708455    |
| TAM41, mitochondrial translocator assembly and maintenance protein, homolog (S. Cerevisiae) | C3orf31     | 695998    |
| Chromosome 4 open reading frame, human c6orf136                                             | C4H6orf136  | 712108    |
| Chromosome 4 open reading frame, human c6orf203                                             | C4H6orf203  | 698108    |
| Chromosome 4 open reading frame, human c6orf62                                              | C4H6orf62   | 708218    |
| Chromosome 4 open reading frame, human c6orf89                                              | C4H6orf89   | 719165    |
| Chromosome 5 open reading frame, human c4orf27                                              | C5H4orf27   | 694607    |
| Chromosome 6 open reading frame, human c5orf15                                              | C6H5orf15   | 709969    |
| Chromosome 6 open reading frame, human c5orf30                                              | C6H5orf30   | 703692    |
| Complement component 7                                                                      | C7          | 696926    |
| Chromosome 7 open reading frame, human c14orf142                                            | C7H14orf142 | 704509    |
| Chromosome 7 open reading frame, human c14orf166                                            | C7H14orf166 | 710094    |
| Chromosome 7 open reading frame, human c14orf169                                            | C7H14orf169 | 696773    |
| Chromosome 7 open reading frame, human c15orf57                                             | C7H15orf57  | 703343    |
| Chromosome 8 open reading frame, human c8orf59                                              | C8H8orf59   | 703464    |
| Chromosome 8 open reading frame, human c8orf76                                              | C8H8orf76   | 704150    |
| Complement component 9                                                                      | C9          | 694223    |
| Chromosome 9 open reading frame, human c10orf107                                            | C9H10orf107 | 700172    |
| Chromosome 9 open reading frame, human c10orf2                                              | C9H10orf2   | 710958    |
| Chromosome 9 open reading frame, human c10orf62                                             | C9H10orf62  | 706769    |
| Carbonic anhydrase VI                                                                       | CA6         | 709540    |
| Carbonic anhydrase VII                                                                      | CA7         | 696681    |
| Caspase activity and apoptosis inhibitor 1                                                  | CAAP1       | 707992    |
| Calcium binding protein 39                                                                  | CAB39       | 711166    |
| Calcium binding protein 4                                                                   | CABP4       | 711973    |
| Calcium binding tyrosine-(Y)-phosphorylation regulated                                      | CABYR       | 701670    |
| Calcyclin binding protein                                                                   | CACYBP      | 709343    |
| Carbamoyl-phosphate synthetase 2, aspartate transcarbamylase,                               | CAD         | 699460    |

|                                                                  |          |        |
|------------------------------------------------------------------|----------|--------|
| and dihydroorotase                                               |          |        |
| Calreticulin                                                     | CALR     | 716910 |
| Calcium/calmodulin-dependent protein kinase I                    | CAMK1    | 700212 |
| Calcium/calmodulin-dependent protein kinase II delta             | CAMK2D   | 702504 |
| Calcium/calmodulin-dependent protein kinase II gamma             | CAMK2G   | 705980 |
| Calcium/calmodulin-dependent protein kinase kinase 1, alpha      | CAMKK1   | 707562 |
| Calcium/calmodulin-dependent protein kinase kinase 2, beta       | CAMKK2   | 699685 |
| Calmodulin regulated spectrin associated protein family member 2 | CAMSAP2  | 709092 |
| Calnexin                                                         | CANX     | 704794 |
| CAP, adenylate cyclase-associated protein 1 (yeast)              | CAP1     | 693719 |
| Calpain 10                                                       | CAPN10   | 716360 |
| Calpain 15                                                       | CAPN15   | 695881 |
| Calpain 2, (m/II) large subunit                                  | CAPN2    | 703047 |
| Calpain 3                                                        | CAPN3    | 707913 |
| Caprin family member 2                                           | CAPRIN2  | 693594 |
| Capping protein (actin filament) muscle Z-line, alpha 1          | CAPZA1   | 705653 |
| Capping protein (actin filament) muscle Z-line, alpha 2          | CAPZA2   | 704662 |
| Caspase recruitment domain family member 11                      | CARD11   | 714728 |
| Calcium regulated heat stable protein 1                          | CARHSP1  | 709224 |
| CysteinyI-trna synthetase                                        | CARS     | 706502 |
| CysteinyI-trna synthetase 2, mitochondrial (putative)            | CARS2    | 694840 |
| CASK interacting protein 2                                       | CASKIN2  | 702477 |
| Caspase 1                                                        | CASP1    | 706568 |
| Caspase 4                                                        | CASP4    | 704864 |
| Caspase 9                                                        | CASP9    | 694544 |
| Catalase                                                         | CAT      | 717406 |
| Cation channel, sperm associated 2                               | CATSPER2 | 710876 |
| Catsper channel auxiliary subunit beta                           | CATSPERB | 697012 |
| Core-binding factor, beta subunit                                | CBFB     | 695767 |
| Cbl proto-oncogene B, E3 ubiquitin protein ligase                | CBLB     | 703879 |
| Chromobox 1                                                      | CBX1     | 696673 |
| Chromobox 7                                                      | CBX7     | 703056 |
| Cell division cycle and apoptosis regulator 1                    | CCAR1    | 693585 |
| Cell cycle and apoptosis regulator 2                             | CCAR2    | 716288 |
| Coiled-coil domain containing 12                                 | CCDC12   | 712061 |
| Coiled-coil domain containing 134                                | CCDC134  | 708713 |
| Coiled-coil domain containing 151                                | CCDC151  | 714600 |
| Coiled-coil domain containing 17                                 | CCDC17   | 706591 |
| Coiled-coil domain containing 174                                | CCDC174  | 701654 |
| Coiled-coil domain containing 181                                | CCDC181  | 700803 |
| Coiled-coil domain containing 186                                | CCDC186  | 722518 |
| Coiled-coil domain containing 191                                | CCDC191  | 710219 |
| Coiled-coil domain containing 27                                 | CCDC27   | 695384 |
| Coiled-coil domain containing 28A                                | CCDC28A  | 703104 |
| Coiled-coil domain containing 3                                  | CCDC3    | 694884 |
| Coiled-coil domain containing 43                                 | CCDC43   | 715325 |
| Coiled-coil domain containing 59                                 | CCDC59   | 698443 |
| Coiled-coil domain containing 69                                 | CCDC69   | 713304 |

|                                                 |          |        |
|-------------------------------------------------|----------|--------|
| Coiled-coil domain containing 92                | CCDC92   | 705922 |
| Coiled-coil domain containing 97                | CCDC97   | 706342 |
| Calicin                                         | CCIN     | 693791 |
| Chemokine (C-C motif) ligand 27                 | CCL27    | 574220 |
| Chemokine (C-C motif) ligand 7                  | CCL7     | 714751 |
| Cyclin D3                                       | CCND3    | 695215 |
| Cyclin D-type binding-protein 1                 | CCNDBP1  | 709589 |
| Cyclin G1                                       | CCNG1    | 697738 |
| Cyclin H                                        | CCNH     | 694224 |
| Cyclin I                                        | CCNI     | 677687 |
| Cyclin T2                                       | CCNT2    | 708813 |
| Chemokine (C-C motif) receptor 6                | CCR6     | 574335 |
| Coiled-coil serine rich protein 2               | CCSER2   | 698006 |
| Chaperonin containing TCP1, subunit 2 (beta)    | CCT2     | 717182 |
| Chaperonin containing TCP1, subunit 5 (epsilon) | CCT5     | 696640 |
| Chaperonin containing TCP1, subunit 8 (theta)   | CCT8     | 706184 |
| CD19 molecule                                   | CD19     | 705211 |
| CD1c molecule                                   | CD1C     | 717148 |
| CD1d molecule                                   | CD1D     | 613268 |
| CD2 molecule                                    | CD2      | 677855 |
| CD200 molecule                                  | CD200    | 708110 |
| CD274 molecule                                  | CD274    | 716043 |
| CD3e molecule, epsilon (CD3-TCR complex)        | CD3E     | 699467 |
| CD3g molecule, gamma (CD3-TCR complex)          | CD3G     | 705270 |
| CD40 ligand                                     | CD40LG   | 574160 |
| CD53 molecule                                   | CD53     | 702350 |
| CD63 molecule                                   | CD63     | 709828 |
| CD79b molecule                                  | CD79B    | 718218 |
| CD86 molecule                                   | CD86     | 714390 |
| CD8b molecule                                   | CD8B     | 699409 |
| CD9 molecule                                    | CD9      | 712262 |
| Cytidine deaminase                              | CDA      | 705913 |
| Cytidine and dcmp deaminase domain containing 1 | CDADC1   | 705941 |
| Cell division cycle 16                          | CDC16    | 699089 |
| Cell division cycle 26                          | CDC26    | 706165 |
| Cell division cycle 37                          | CDC37    | 715390 |
| CDC42 effector protein (Rho gtpase binding) 4   | CDC42EP4 | 696227 |
| Cell division cycle 5 like                      | CDC5L    | 703099 |
| Cell division cycle associated 7                | CDCA7    | 696474 |
| Cadherin 11, type 2, OB-cadherin (osteoblast)   | CDH11    | 708826 |
| Cadherin 13                                     | CDH13    | 718038 |
| Cadherin 5, type 2 (vascular endothelium)       | CDH5     | 693297 |
| Cadherin related family member 2                | CDHR2    | 697249 |
| Cyclin-dependent kinase 12                      | CDK12    | 696733 |
| Cyclin-dependent kinase 17                      | CDK17    | 717183 |
| Cyclin-dependent kinase 2                       | CDK2     | 711002 |
| Cyclin-dependent kinase 4                       | CDK4     | 715650 |
| Cyclin-dependent kinase 9                       | CDK9     | 699840 |



|                                                                        |          |        |
|------------------------------------------------------------------------|----------|--------|
| CDKN2A interacting protein                                             | CDKN2AIP | 701583 |
| Cyclin-dependent kinase inhibitor 2C (p18, inhibits CDK4)              | CDKN2C   | 711877 |
| Cerebellar degeneration related protein 2                              | CDR2     | 698974 |
| Cerebellar degeneration-related protein 2-like                         | CDR2L    | 700082 |
| Caudal type homeobox 4                                                 | CDX4     | 701374 |
| Chromodomain protein, Y-like                                           | CDYL     | 722957 |
| CCAAT/enhancer binding protein (C/EBP), zeta                           | CEBPZ    | 712090 |
| Cat eye syndrome chromosome region, candidate 5                        | CECR5    | 709197 |
| CUGBP, Elav-like family member 3                                       | CELF3    | 716884 |
| Centromere protein C                                                   | CENPC    | 710620 |
| Centromere protein I                                                   | CENPI    | 702316 |
| Centromere protein M                                                   | CENPM    | 709006 |
| Centrosomal protein 170kda                                             | CEP170   | 705427 |
| Centrosomal protein 192kda                                             | CEP192   | 722121 |
| Centrosomal protein 290kda                                             | CEP290   | 708286 |
| Centrosomal protein 41kda                                              | CEP41    | 703215 |
| Centrosomal protein 57kda-like 1                                       | CEP57L1  | 700109 |
| Centrosomal protein 72kda                                              | CEP72    | 708753 |
| Centrosomal protein 83kda                                              | CEP83    | 711408 |
| Choline/ethanolamine phosphotransferase 1                              | CEPT1    | 702700 |
| Ceramide synthase 2                                                    | CERS2    | 716180 |
| Ceramide synthase 4                                                    | CERS4    | 706728 |
| Centrin 3                                                              | CETN3    | 695223 |
| Cilia and flagella associated protein 53                               | CFAP53   | 700084 |
| Cilia and flagella associated protein 65                               | CFAP65   | 701296 |
| Cofilin 1 (non-muscle)                                                 | CFL1     | 721882 |
| Cofilin 2 (muscle)                                                     | CFL2     | 693875 |
| Complement factor properdin                                            | CFP      | 707386 |
| CGG triplet repeat binding protein 1                                   | CGGBP1   | 693920 |
| Cell growth regulator with ring finger domain 1                        | CGRRF1   | 695231 |
| Chromodomain helicase DNA binding protein 4                            | CHD4     | 713162 |
| Checkpoint kinase 2                                                    | CHEK2    | 713668 |
| Calcium homeostasis endoplasmic reticulum protein                      | CHERP    | 718689 |
| Cysteine rich hydrophobic domain 2                                     | CHIC2    | 697359 |
| Chitinase domain containing 1                                          | CHID1    | 701435 |
| Choline kinase beta                                                    | CHKB     | 716377 |
| Charged multivesicular body protein 4B                                 | CHMP4B   | 709004 |
| Charged multivesicular body protein 5                                  | CHMP5    | 703191 |
| Charged multivesicular body protein 6                                  | CHMP6    | 718353 |
| Chondroitin polymerizing factor                                        | CHPF     | 703860 |
| Chromatin accessibility complex 1                                      | CHRA1    | 700384 |
| Carbohydrate (keratan sulfate Gal-6) sulfotransferase 1                | CHST1    | 715176 |
| Carbohydrate (N-acetylgalactosamine 4-O) sulfotransferase 14           | CHST14   | 703115 |
| Carbohydrate (N-acetylgalactosamine 4-sulfate 6-O) sulfotransferase 15 | CHST15   | 693845 |
| Carbohydrate (N-acetylglucosamine 6-O) sulfotransferase 4              | CHST4    | 708116 |
| Carbohydrate (N-acetylglucosamine 6-O) sulfotransferase 7              | CHST7    | 704906 |
| Chromatin target of PRMT1                                              | CHTOP    | 715501 |

|                                                                  |        |           |
|------------------------------------------------------------------|--------|-----------|
| Conserved helix-loop-helix ubiquitous kinase                     | CHUK   | 709511    |
| Circadian associated repressor of transcription                  | CIART  | 706693    |
| Cell death-inducing DFFA-like effector b                         | CIDEB  | 100425328 |
| CLOCK-interacting pacemaker                                      | CIPC   | 704679    |
| Cold inducible RNA binding protein                               | CIRBP  | 706175    |
| Cytokine inducible SH2-containing protein                        | CISH   | 701456    |
| CDKN1A interacting zinc finger protein 1                         | CIZ1   | 717725    |
| Cytoskeleton associated protein 5                                | CKAP5  | 714095    |
| Creatine kinase, brain                                           | CKB    | 711167    |
| CDC28 protein kinase regulatory subunit 1B                       | CKS1B  | 717164    |
| Claudin 15                                                       | CLDN15 | 719637    |
| Claudin 16                                                       | CLDN16 | 704442    |
| Claudin 3                                                        | CLDN3  | 716771    |
| Claudin 9                                                        | CLDN9  | 699721    |
| C-type lectin domain family 1, member A                          | CLEC1A | 717526    |
| C-type lectin domain family 9 member A                           | CLEC9A | 717472    |
| Chloride intracellular channel 4                                 | CLIC4  | 712337    |
| CAP-Gly domain containing linker protein family member 4         | CLIP4  | 704092    |
| CDC like kinase 1                                                | CLK1   | 700320    |
| CDC like kinase 3                                                | CLK3   | 702511    |
| Calmin (calponin-like, transmembrane)                            | CLMN   | 709910    |
| Cleavage and polyadenylation factor I subunit 1                  | CLP1   | 705071    |
| Cleft lip and palate associated transmembrane protein 1          | CLPTM1 | 718306    |
| Clathrin, light chain A                                          | CLTA   | 693659    |
| Cytidine monophosphate N-acetylneuraminic acid synthetase        | CMAS   | 706604    |
| C-x(9)-C motif containing 4                                      | CMC4   | 100423504 |
| Cytidine monophosphate (UMP-CMP) kinase 1, cytosolic             | CMPK1  | 710196    |
| CKLF-like MARVEL transmembrane domain containing 2               | CMTM2  | 693810    |
| Cap methyltransferase 2                                          | CMTR2  | 711529    |
| Cyclic nucleotide binding domain containing 2                    | CNBD2  | 703290    |
| Carnosine dipeptidase 1 (metallopeptidase M20 family)            | CNDP1  | 695195    |
| Cornichon family AMPA receptor auxiliary protein 1               | CNIH1  | 695002    |
| Cornichon family AMPA receptor auxiliary protein 4               | CNIH4  | 701767    |
| CNKSR family member 3                                            | CNKSR3 | 702627    |
| Cyclin and CBS domain divalent metal cation transport mediator 2 | CNNM2  | 714238    |
| CCR4-NOT transcription complex subunit 10                        | CNOT10 | 704986    |
| CCR4-NOT transcription complex subunit 3                         | CNOT3  | 693292    |
| CCR4-NOT transcription complex subunit 7                         | CNOT7  | 702192    |
| CCR4-NOT transcription complex subunit 8                         | CNOT8  | 714813    |
| Ciliary neurotrophic factor                                      | CNTF   | 701907    |
| Contactin 1                                                      | CNTN1  | 574365    |
| Centriolin                                                       | CNTRL  | 700200    |
| Centrobin, centrosomal BRCA2 interacting protein                 | CNTROB | 716660    |
| Component of oligomeric golgi complex 1                          | COG1   | 695754    |
| Component of oligomeric golgi complex 2                          | COG2   | 714263    |
| Collagen, type I, alpha 2                                        | COL1A2 | 700359    |
| Collagen, type III, alpha 1                                      | COL3A1 | 574131    |
| Collagen, type VI, alpha 3                                       | COL6A3 | 694701    |

|                                                                                              |         |           |
|----------------------------------------------------------------------------------------------|---------|-----------|
| Collagen, type VIII, alpha 2                                                                 | COL8A2  | 713447    |
| COMM domain containing 2                                                                     | COMMD2  | 711498    |
| COMM domain containing 5                                                                     | COMMD5  | 704586    |
| COMM domain containing 6                                                                     | COMMD6  | 695191    |
| COMM domain containing 8                                                                     | COMMD8  | 704346    |
| Catechol-O-methyltransferase                                                                 | COMT    | 712548    |
| Coatomer protein complex subunit beta 1                                                      | COPB1   | 699327    |
| COP9 signalosome subunit 2                                                                   | COPS2   | 714814    |
| COP9 signalosome subunit 3                                                                   | COPS3   | 698461    |
| COP9 signalosome subunit 5                                                                   | COPS5   | 704584    |
| COP9 signalosome subunit 6                                                                   | COPS6   | 710667    |
| Coatomer protein complex subunit zeta 1                                                      | COPZ1   | 705176    |
| Coenzyme Q10A                                                                                | COQ10A  | 712341    |
| Coenzyme Q2 4-hydroxybenzoate polyprenyltransferase                                          | COQ2    | 707681    |
| COX10 homolog, cytochrome c oxidase assembly protein,<br>heme A: farnesyltransferase (yeast) | COX10   | 718301    |
| Cytochrome c oxidase subunit 5A                                                              | COX5A   | 692061    |
| Cytochrome c oxidase subunit 6C                                                              | COX6C   | 100428416 |
| Carboxypeptidase A5                                                                          | CPA5    | 702974    |
| Carboxypeptidase A6                                                                          | CPA6    | 705117    |
| Carboxypeptidase B1                                                                          | CPB1    | 712639    |
| Carboxypeptidase E                                                                           | CPE     | 708881    |
| Cytoplasmic polyadenylation element binding protein 4                                        | CPEB4   | 704141    |
| Carboxypeptidase N subunit 2                                                                 | CPN2    | 106997192 |
| Copine I                                                                                     | CPNE1   | 100329144 |
| Copine II                                                                                    | CPNE2   | 703557    |
| Copine VIII                                                                                  | CPNE8   | 696586    |
| Carboxypeptidase Q                                                                           | CPQ     | 701711    |
| Cleavage and polyadenylation specific factor 1                                               | CPSF1   | 702082    |
| Cleavage and polyadenylation specific factor 4                                               | CPSF4   | 708119    |
| Carnitine palmitoyltransferase 1B                                                            | CPT1B   | 720697    |
| Carboxypeptidase, vitellogenic-like                                                          | CPVL    | 697111    |
| CASP2 and RIPK1 domain containing adaptor with death domain                                  | CRADD   | 711165    |
| Camp responsive element binding protein 3                                                    | CREB3   | 696350    |
| Camp responsive element binding protein 3-like 4                                             | CREB3L4 | 715951    |
| Camp responsive element modulator                                                            | CREM    | 698636    |
| Cytotoxic and regulatory T-cell molecule                                                     | CRTAM   | 707560    |
| Cryptochrome circadian clock 1                                                               | CRY1    | 703752    |
| Crystallin beta B3                                                                           | CRYBB3  | 711554    |
| Crystallin, gamma C                                                                          | CRYGC   | 709553    |
| Cold shock domain containing E1, RNA binding                                                 | CSDE1   | 708897    |
| CSE1 chromosome segregation 1-like (yeast)                                                   | CSE1L   | 704301    |
| Colony stimulating factor 3                                                                  | CSF3    | 698961    |
| Colony stimulating factor 3 receptor                                                         | CSF3R   | 713485    |
| C-src tyrosine kinase                                                                        | CSK     | 702868    |
| Casein kinase 1, alpha 1                                                                     | CSNK1A1 | 710775    |
| Casein kinase 2, alpha 1 polypeptide                                                         | CSNK2A1 | 714841    |
| Casein kinase 2, beta polypeptide                                                            | CSNK2B  | 715807    |

|                                                        |           |           |
|--------------------------------------------------------|-----------|-----------|
| Cysteine-serine-rich nuclear protein 2                 | CSRNP2    | 694549    |
| Cystatin C                                             | CST3      | 574313    |
| Cleavage stimulation factor, 3' pre-RNA, subunit 3     | CSTF3     | 694040    |
| CTS telomere maintenance complex component 1           | CTC1      | 717075    |
| CTD phosphatase subunit 1                              | CTDP1     | 698467    |
| CTD small phosphatase 1                                | CTDSP1    | 698824    |
| CTD small phosphatase like 2                           | CTDSPL2   | 711917    |
| Catenin alpha 1                                        | CTNNA1    | 574385    |
| Catenin alpha-like 1                                   | CTNNAL1   | 710389    |
| Catenin beta like 1                                    | CTNNBL1   | 700310    |
| Catenin delta 1                                        | CTNND1    | 704212    |
| Cystinosin, lysosomal cystine transporter              | CTNS      | 706721    |
| CTP synthase 1                                         | CTPS1     | 695498    |
| CTR9 homolog, Paf1/RNA polymerase II complex component | CTR9      | 705748    |
| Chymotrypsin-like                                      | CTRL      | 701625    |
| Cathepsin A                                            | CTSA      | 708592    |
| Cathepsin B                                            | CTSB      | 100424760 |
| Cathepsin C                                            | CTSC      | 705320    |
| Cathepsin H                                            | CTSH      | 711437    |
| Cathepsin L                                            | CTSL      | 694569    |
| CUE domain containing 2                                | CUEDC2    | 713243    |
| Cullin 4A                                              | CUL4A     | 714302    |
| Cullin 5                                               | CUL5      | 707559    |
| Cullin 7                                               | CUL7      | 699545    |
| Cute copper transporter                                | CUTC      | 709050    |
| CWC15 spliceosome-associated protein                   | CWC15     | 698332    |
| CWF19-like 2, cell cycle control (S. Pombe)            | CWF19L2   | 706825    |
| Chemokine (C-X-C motif) ligand 17                      | CXCL17    | 708108    |
| Chemokine (C-X-C motif) receptor 3                     | CXCR3     | 699438    |
| Chemokine (C-X-C motif) receptor 4                     | CXCR4     | 707329    |
| Chemokine (C-X-C motif) receptor 6                     | CXCR6     | 713829    |
| Chromosome X open reading frame, human cxorf23         | CXHXorf23 | 696449    |
| Cytochrome b-245 heavy chain                           | CYBB      | 696542    |
| Cytochrome b reductase 1                               | CYBRD1    | 694818    |
| Cytochrome P450c17                                     | CYP17A1   | 678693    |
| Cytochrome P450, family 27, subfamily B, polypeptide 1 | CYP27B1   | 715747    |
| Cytochrome P450, family 2, subfamily D, polypeptide 6  | CYP2D6    | 678691    |
| Cytochrome P450, family 7, subfamily A, polypeptide 1  | CYP7A1    | 698127    |
| Dachshund family transcription factor 1                | DACH1     | 693532    |
| Defender against cell death 1                          | DAD1      | 711840    |
| Dystroglycan 1                                         | DAG1      | 706179    |
| DALR anticodon binding domain containing 3             | DALRD3    | 708403    |
| Death-associated protein                               | DAP       | 697362    |
| Death associated protein 3                             | DAP3      | 719314    |
| Death-associated protein kinase 1                      | DAPK1     | 694315    |
| DAZ associated protein 1                               | DAZAP1    | 707132    |
| Drebrin 1                                              | DBN1      | 700375    |
| DDB1 and CUL4 associated factor 11                     | DCAF11    | 714867    |

|                                                              |          |           |
|--------------------------------------------------------------|----------|-----------|
| DDB1 and CUL4 associated factor 4                            | DCAF4    | 695337    |
| DDB1 and CUL4 associated factor 5                            | DCAF5    | 714522    |
| DDB1 and CUL4 associated factor 6                            | DCAF6    | 698686    |
| Dachsous cadherin-related 1                                  | DCHS1    | 711938    |
| Decorin                                                      | DCN      | 709933    |
| Decapping mrna 1A                                            | DCP1A    | 694198    |
| Decapping mrna 1B                                            | DCP1B    | 708089    |
| DC-STAMP domain containing 2                                 | DCST2    | 717224    |
| Dynactin subunit 1                                           | DCTN1    | 708290    |
| Dynactin subunit 2                                           | DCTN2    | 714948    |
| DCN1, defective in cullin neddylation 1, domain containing 1 | DCUN1D1  | 708357    |
| DCN1, defective in cullin neddylation 1, domain containing 4 | DCUN1D4  | 702908    |
| DCN1, defective in cullin neddylation 1, domain containing 5 | DCUN1D5  | 704099    |
| Discoidin domain receptor tyrosine kinase 1                  | DDR1     | 714233    |
| DDR GK domain containing 1                                   | DDR GK1  | 717226    |
| DEAD (Asp-Glu-Ala-Asp) box helicase 1                        | DDX1     | 698327    |
| DEAD/H (Asp-Glu-Ala-Asp/His) box polypeptide 26B             | DDX26B   | 709688    |
| DEAD (Asp-Glu-Ala-Asp) box polypeptide 27                    | DDX27    | 703852    |
| DEAD (Asp-Glu-Ala-Asp) box polypeptide 39A                   | DDX39A   | 718822    |
| DEAD (Asp-Glu-Ala-Asp) box helicase 3, Y-linked              | DDX3Y    | 100270696 |
| DEAD (Asp-Glu-Ala-Asp) box polypeptide 41                    | DDX41    | 700742    |
| DEAD (Asp-Glu-Ala-Asp) box polypeptide 47                    | DDX47    | 697304    |
| DEAD (Asp-Glu-Ala-Asp) box helicase 5                        | DDX5     | 677694    |
| DEAD (Asp-Glu-Ala-Asp) box helicase 56                       | DDX56    | 698980    |
| 2,4-dienoyl-coa reductase 1, mitochondrial                   | DECR1    | 696035    |
| Death effector domain containing                             | DEDD     | 719875    |
| Defensin, alpha 4, corticostatin                             | DEFA4    | 574311    |
| Defensin alpha 6                                             | DEFA6    | 717000    |
| Defensin beta 108B                                           | DEFB108B | 696933    |
| Defensin beta 121                                            | DEFB121  | 619507    |
| DEK proto-oncogene                                           | DEK      | 712460    |
| DENN/MADD domain containing 4A                               | DENND4A  | 709675    |
| DENN/MADD domain containing 5A                               | DENND5A  | 707945    |
| DENN/MADD domain containing 6A                               | DENND6A  | 707616    |
| Derlin 1                                                     | DERL1    | 703803    |
| Derlin 2                                                     | DERL2    | 712051    |
| Desumoylating isopeptidase 2                                 | DESI2    | 713515    |
| Dexi homolog (mouse)                                         | DEXI     | 100430904 |
| Digeorge syndrome critical region gene 6                     | DGCR6    | 693512    |
| Deoxyguanosine kinase                                        | DGUOK    | 707554    |
| Dehydrodolichyl diphosphate synthase subunit                 | DHDDS    | 714635    |
| Deoxyhypusine synthase                                       | DHPS     | 716213    |
| Dehydrogenase/reductase (SDR family) member 1                | DHRS1    | 715933    |
| Dehydrogenase/reductase (SDR family) member 11               | DHRS11   | 713823    |
| Dehydrogenase/reductase (SDR family) member 3                | DHRS3    | 715548    |
| DEAH (Asp-Glu-Ala-His) box helicase 15                       | DHX15    | 715852    |
| DEAH (Asp-Glu-Ala-His) box polypeptide 29                    | DHX29    | 706306    |
| DEAH (Asp-Glu-Ala-His) box helicase 30                       | DHX30    | 711178    |

|                                                               |         |        |
|---------------------------------------------------------------|---------|--------|
| DEAH (Asp-Glu-Ala-His) box polypeptide 38                     | DHX38   | 709173 |
| DEAH (Asp-Glu-Ala-Asp/His) box polypeptide 57                 | DHX57   | 713523 |
| DEAH (Asp-Glu-Ala-His) box helicase 9                         | DHX9    | 715453 |
| Dicer 1, ribonuclease type III                                | DICER1  | 702516 |
| Death inducer-obliterator 1                                   | DIDO1   | 698313 |
| DIS3 like exosome 3'-5' exoribonuclease                       | DIS3L   | 710238 |
| Discs, large homolog 1 (Drosophila)                           | DLG1    | 709572 |
| Discs, large homolog 4 (Drosophila)                           | DLG4    | 714273 |
| Discs, large homolog 5 (Drosophila)                           | DLG5    | 703123 |
| Delta-like 4 (Drosophila)                                     | DLL4    | 704898 |
| Distal-less homeobox 3                                        | DLX3    | 700831 |
| Distal-less homeobox 5                                        | DLX5    | 697853 |
| DNA methyltransferase 1 associated protein 1                  | DMAP1   | 702919 |
| DMRT like family B with proline rich C-terminal 1             | DMRTB1  | 714424 |
| Dmx-like 1                                                    | DMXL1   | 698117 |
| Dynein, axonemal, assembly factor 2                           | DNAAF2  | 719026 |
| Dnaj heat shock protein family (Hsp40) member A1              | DNAJA1  | 703765 |
| Dnaj heat shock protein family (Hsp40) member B4              | DNAJB4  | 707206 |
| Dnaj heat shock protein family (Hsp40) member C22             | DNAJC22 | 710205 |
| Dnaj heat shock protein family (Hsp40) member C27             | DNAJC27 | 694037 |
| Dnaj heat shock protein family (Hsp40) member C3              | DNAJC3  | 695757 |
| Dnaj heat shock protein family (Hsp40) member C6              | DNAJC6  | 698682 |
| Dnaj heat shock protein family (Hsp40) member C8              | DNAJC8  | 720231 |
| Dnaj heat shock protein family (Hsp40) member C9              | DNAJC9  | 707599 |
| Dynamin 1-like                                                | DNM1L   | 695388 |
| Dynamin 2                                                     | DNM2    | 713558 |
| DNA (cytosine-5-)-methyltransferase 1                         | DNMT1   | 574321 |
| Aspartyl aminopeptidase                                       | DNPEP   | 703180 |
| Dedicator of cytokinesis 11                                   | DOCK11  | 710690 |
| Dedicator of cytokinesis 5                                    | DOCK5   | 711359 |
| Docking protein 4                                             | DOK4    | 704443 |
| Docking protein 5                                             | DOK5    | 698689 |
| Dipeptidase 3                                                 | DPEP3   | 701327 |
| Dipeptidyl-peptidase 3                                        | DPP3    | 721809 |
| Dihydropyrimidine dehydrogenase                               | DPYD    | 715672 |
| DR1-associated protein 1 (negative cofactor 2 alpha)          | DRAP1   | 715271 |
| Developmentally regulated GTP binding protein 1               | DRG1    | 716791 |
| Drosha, ribonuclease type III                                 | DROSHA  | 692081 |
| Dystrophin related protein 2                                  | DRP2    | 702655 |
| Desmoplakin                                                   | DSP     | 694860 |
| Dual serine/threonine and tyrosine protein kinase             | DSTYK   | 664732 |
| Denticleless E3 ubiquitin protein ligase homolog (Drosophila) | DTL     | 711236 |
| DTW domain containing 1                                       | DTWD1   | 715084 |
| Deltex 3, E3 ubiquitin ligase                                 | DTX3    | 715175 |
| Dihydrouridine synthase 1-like                                | DUS1L   | 715662 |
| Dual specificity phosphatase 11                               | DUSP11  | 707123 |
| Dual specificity phosphatase 12                               | DUSP12  | 720034 |
| Dual specificity phosphatase 23                               | DUSP23  | 719474 |

|                                                                   |          |           |
|-------------------------------------------------------------------|----------|-----------|
| Dual specificity phosphatase 6                                    | DUSP6    | 708907    |
| Dishevelled segment polarity protein 1                            | DVL1     | 705864    |
| Dishevelled segment polarity protein 2                            | DVL2     | 714381    |
| Dynein, cytoplasmic 1, intermediate chain 2                       | DYNC1I2  | 695696    |
| Dynein, light chain, LC8-type 1                                   | DYNLL1   | 702360    |
| Dynein, light chain, roadblock-type 2                             | DYNLRB2  | 713503    |
| Dual specificity tyrosine-(Y)-phosphorylation regulated kinase 1B | DYRK1B   | 698848    |
| Dual specificity tyrosine-(Y)-phosphorylation regulated kinase 2  | DYRK2    | 717941    |
| E2F transcription factor 3                                        | E2F3     | 713904    |
| E2F transcription factor 4, p107/p130-binding                     | E2F4     | 696864    |
| E2F transcription factor 5, p130-binding                          | E2F5     | 703352    |
| E2F-associated phosphoprotein                                     | EAPP     | 714727    |
| Endogenous Bornavirus-like nucleoprotein 2                        | EBLN2    | 693420    |
| Emopamil binding protein (sterol isomerase)                       | EBP      | 714315    |
| Ecdysoneless homolog (Drosophila)                                 | ECD      | 707699    |
| Enoyl-coa delta isomerase 2                                       | ECI2     | 709579    |
| Epithelial cell transforming 2                                    | ECT2     | 694056    |
| Ectodysplasin A receptor                                          | EDAR     | 695059    |
| ER degradation enhancer, mannosidase alpha-like 3                 | EDEM3    | 714475    |
| Endothelin receptor type A                                        | EDNRA    | 704135    |
| Embryonic ectoderm development                                    | EED      | 703866    |
| Eukaryotic translation elongation factor 1 beta 2                 | EEF1B2   | 707019    |
| Eukaryotic translation elongation factor 1 epsilon 1              | EEF1E1   | 695426    |
| Eukaryotic translation elongation factor 1 gamma                  | EEF1G    | 722274    |
| EF-hand domain (C-terminal) containing 1                          | EFHC1    | 708517    |
| Ephrin-B1                                                         | EFNB1    | 694149    |
| Elongation factor Tu GTP binding domain containing 2              | EFTUD2   | 715512    |
| EGF-like-domain, multiple 7                                       | EGFL7    | 709840    |
| EGF-like-domain, multiple 8                                       | EGFL8    | 717145    |
| Eukaryotic translation initiation factor 2A, 65kda                | EIF2A    | 710497    |
| Eukaryotic translation initiation factor 2-alpha kinase 3         | EIF2AK3  | 699575    |
| Eukaryotic translation initiation factor 2D                       | EIF2D    | 695274    |
| Eukaryotic translation initiation factor 2 subunit beta           | EIF2S2   | 708593    |
| Eukaryotic translation initiation factor 3 subunit D              | EIF3D    | 695051    |
| Eukaryotic translation initiation factor 3 subunit F              | EIF3F    | 706269    |
| Eukaryotic translation initiation factor 3 subunit G              | EIF3G    | 714726    |
| Eukaryotic translation initiation factor 3 subunit H              | EIF3H    | 700517    |
| Eukaryotic translation initiation factor 3 subunit K              | EIF3K    | 693536    |
| Eukaryotic translation initiation factor 3 subunit L              | EIF3L    | 699189    |
| Eukaryotic translation initiation factor 3 subunit M              | EIF3M    | 695698    |
| Eukaryotic translation initiation factor 4A2                      | EIF4A2   | 707775    |
| Eukaryotic translation initiation factor 4E family member 2       | EIF4E2   | 713487    |
| Eukaryotic translation initiation factor 4E family member 3       | EIF4E3   | 696303    |
| Eukaryotic translation initiation factor 4E binding protein 2     | EIF4EBP2 | 100424760 |
| Eukaryotic translation initiation factor 4E binding protein 3     | EIF4EBP3 | 100532736 |
| Eukaryotic translation initiation factor 4H                       | EIF4H    | 693429    |
| E74-like factor 2 (ets domain transcription factor)               | ELF2     | 696760    |
| Engulfment and cell motility 2                                    | ELMO2    | 707316    |

|                                                               |         |        |
|---------------------------------------------------------------|---------|--------|
| ELOVL fatty acid elongase 2                                   | ELOVL2  | 703030 |
| ELOVL fatty acid elongase 4                                   | ELOVL4  | 692070 |
| ER membrane protein complex subunit 1                         | EMC1    | 702573 |
| ER membrane protein complex subunit 4                         | EMC4    | 695907 |
| Endonuclease domain containing 1                              | ENDOD1  | 699210 |
| Enolase superfamily member 1                                  | ENOSF1  | 697333 |
| Ecto-NOX disulfide-thiol exchanger 2                          | ENOX2   | 703816 |
| Ectonucleotide pyrophosphatase/phosphodiesterase 1            | ENPP1   | 710140 |
| Ectonucleotide pyrophosphatase/phosphodiesterase 2            | ENPP2   | 705287 |
| Ectonucleotide pyrophosphatase/phosphodiesterase 4 (putative) | ENPP4   | 703680 |
| Eomesodermin                                                  | EOMES   | 704711 |
| E1A binding protein p300                                      | EP300   | 706258 |
| Erythrocyte membrane protein band 4.1-like 1                  | EPB41L1 | 710697 |
| Enhancer of polycomb homolog 2 (Drosophila)                   | EPC2    | 721916 |
| EPH receptor B6                                               | EPHB6   | 704886 |
| Epidermal growth factor receptor pathway substrate 15-like 1  | EPS15L1 | 719502 |
| EPS8 like 1                                                   | EPS8L1  | 698281 |
| Excision repair cross-complementation group 3                 | ERCC3   | 698829 |
| Excision repair cross-complementation group 6                 | ERCC6   | 710153 |
| ERGIC and golgi 3                                             | ERGIC3  | 704736 |
| Enhancer of rudimentary homolog (Drosophila)                  | ERH     | 712507 |
| Endoplasmic reticulum lectin 1                                | ERLEC1  | 716460 |
| Endothelial cell adhesion molecule                            | ESAM    | 712200 |
| Esterase D                                                    | ESD     | 708871 |
| ESF1 nucleolar pre-rRNA processing protein homolog            | ESF1    | 694159 |
| Extended synaptotagmin-like protein 1                         | ESYT1   | 711720 |
| Eukaryotic translation termination factor 1                   | ETF1    | 714449 |
| Electron-transferring-flavoprotein dehydrogenase              | ETFDH   | 701207 |
| V-ets avian erythroblastosis virus E26 oncogene homolog 1     | ETS1    | 714697 |
| Even-skipped homeobox 1                                       | EVX1    | 699106 |
| EWS RNA binding protein 1                                     | EWSR1   | 714432 |
| Exonuclease 3'-5' domain containing 2                         | EXD2    | 712296 |
| Exocyst complex component 1                                   | EXOC1   | 695664 |
| Exocyst complex component 2                                   | EXOC2   | 706296 |
| Exocyst complex component 3-like 2                            | EXOC3L2 | 713992 |
| Exocyst complex component 4                                   | EXOC4   | 712458 |
| Exocyst complex component 7                                   | EXOC7   | 705801 |
| Exosome component 10                                          | EXOSC10 | 714153 |
| Exostosin glycosyltransferase 1                               | EXT1    | 701488 |
| Exostosin glycosyltransferase 2                               | EXT2    | 715975 |
| F11 receptor                                                  | F11R    | 719824 |
| Coagulation factor XII (Hageman factor)                       | F12     | 699875 |
| Coagulation factor II (thrombin)                              | F2      | 712729 |
| Coagulation factor II (thrombin) receptor                     | F2R     | 707370 |
| Fas (TNFRSF6) associated factor 1                             | FAF1    | 714405 |
| Fumarylacetoacetate hydrolase (fumarylacetoacetase)           | FAH     | 712716 |
| Fas apoptotic inhibitory molecule                             | FAIM    | 716216 |
| Family with sequence similarity 104 member A                  | FAM104A | 695865 |



|                                                                                |          |        |
|--------------------------------------------------------------------------------|----------|--------|
| Family with sequence similarity 109 member B                                   | FAM109B  | 709545 |
| Family with sequence similarity 110 member A                                   | FAM110A  | 717055 |
| Family with sequence similarity 122A                                           | FAM122A  | 698955 |
| Family with sequence similarity 126 member A                                   | FAM126A  | 705467 |
| Family with sequence similarity 127, member A                                  | FAM127A  | 708766 |
| Family with sequence similarity 134 member A                                   | FAM134A  | 704378 |
| Family with sequence similarity 156 member B                                   | FAM156B  | 698392 |
| Family with sequence similarity 175 member B                                   | FAM175B  | 694886 |
| Family with sequence similarity 178 member B                                   | FAM178B  | 710890 |
| Family with sequence similarity 179 member B                                   | FAM179B  | 702188 |
| Family with sequence similarity 181 member B                                   | FAM181B  | 701184 |
| Family with sequence similarity 188 member A                                   | FAM188A  | 699009 |
| Family with sequence similarity 199, X-linked                                  | FAM199X  | 699523 |
| Family with sequence similarity 219 member A                                   | FAM219A  | 700651 |
| Family with sequence similarity 220 member A                                   | FAM220A  | 703785 |
| Family with sequence similarity 222 member B                                   | FAM222B  | 710302 |
| Family with sequence similarity 234 member A                                   | FAM234A  | 694729 |
| Family with sequence similarity 35 member A                                    | FAM35A   | 694102 |
| Family with sequence similarity 3 member A                                     | FAM3A    | 701159 |
| Family with sequence similarity 3 member B                                     | FAM3B    | 722516 |
| Family with sequence similarity 43 member B                                    | FAM43B   | 705659 |
| Family with sequence similarity 53 member C                                    | FAM53C   | 714176 |
| Family with sequence similarity 58 member A                                    | FAM58A   | 695925 |
| Family with sequence similarity 76 member A                                    | FAM76A   | 716420 |
| Family with sequence similarity 76 member B                                    | FAM76B   | 699581 |
| Family with sequence similarity 83 member A                                    | FAM83A   | 704023 |
| Family with sequence similarity 83 member F                                    | FAM83F   | 704523 |
| Family with sequence similarity 89 member B                                    | FAM89B   | 721925 |
| Family with sequence similarity 8 member A1                                    | FAM8A1   | 703789 |
| Family with sequence similarity 92 member A1                                   | FAM92A1  | 698794 |
| FANCD2 opposite strand                                                         | FANCD2OS | 715980 |
| Fanconi anemia complementation group E                                         | FANCE    | 718889 |
| Fanconi anemia complementation group G                                         | FANCG    | 698837 |
| Fatty acyl coa reductase 1                                                     | FAR1     | 699947 |
| Phenylalanyl-trna synthetase 2, mitochondrial                                  | FARS2    | 710945 |
| FAST kinase domains 1                                                          | FASTKD1  | 706154 |
| Finkel-Biskis-Reilly murine sarcoma virus (FBR-musv)<br>ubiquitously expressed | FAU      | 716761 |
| Failed axon connections homolog                                                | FAXC     | 693945 |
| Fibrillarin                                                                    | FBL      | 700286 |
| Filamin binding LIM protein 1                                                  | FBLIM1   | 695727 |
| F-box and leucine-rich repeat protein 6                                        | FBXL6    | 701594 |
| F-box protein 11                                                               | FBXO11   | 715651 |
| F-box protein 30                                                               | FBXO30   | 699241 |
| F-box protein 4                                                                | FBXO4    | 697007 |
| F-box protein 40                                                               | FBXO40   | 713933 |
| F-box and WD repeat domain containing 11                                       | FBXW11   | 708990 |
| F-box and WD repeat domain containing 7                                        | FBXW7    | 695101 |

|                                                                      |        |        |
|----------------------------------------------------------------------|--------|--------|
| F-box and WD repeat domain containing 9                              | FBXW9  | 716383 |
| Fc fragment of ige, high affinity I, receptor for; alpha polypeptide | FCER1A | 719324 |
| FCF1 rRNA-processing protein                                         | FCF1   | 700044 |
| Fc fragment of igg, receptor, transporter, alpha                     | FCGRT  | 718859 |
| FCH and double SH3 domains 2                                         | FCHSD2 | 717996 |
| Fc receptor-like B                                                   | FCRLB  | 720028 |
| Fem-1 homolog a (C. Elegans)                                         | FEM1A  | 694843 |
| Fem-1 homolog b (C. Elegans)                                         | FEM1B  | 693955 |
| Fermitin family member 3                                             | FERMT3 | 722120 |
| FEV (ETS oncogene family)                                            | FEV    | 701065 |
| Fibroblast growth factor 10                                          | FGF10  | 701584 |
| Fibroblast growth factor 16                                          | FGF16  | 705612 |
| Fibroblast growth factor receptor 1                                  | FGFR1  | 700126 |
| Four and a half LIM domains 2                                        | FHL2   | 713222 |
| Four and a half LIM domains 3                                        | FHL3   | 715313 |
| FIC domain containing                                                | FICD   | 706780 |
| FIG4 phosphoinositide 5-phosphatase                                  | FIG4   | 699914 |
| FK506 binding protein 11                                             | FKBP11 | 708598 |
| FK506 binding protein 7                                              | FKBP7  | 703299 |
| FK506 binding protein 9                                              | FKBP9  | 708827 |
| Flightless I actin binding protein                                   | FLII   | 700471 |
| Filamin B, beta                                                      | FLNB   | 702732 |
| Feline leukemia virus subgroup C cellular receptor 1                 | FLVCR1 | 710008 |
| Flavin containing monooxygenase 3                                    | FMO3   | 574244 |
| Farnesyltransferase, CAAX box, beta                                  | FNTB   | 708129 |
| FBJ murine osteosarcoma viral oncogene homolog                       | FOS    | 702077 |
| Forkhead box A1                                                      | FOXA1  | 697909 |
| Forkhead box O3                                                      | FOXO3  | 700731 |
| Forkhead box P2                                                      | FOXP2  | 613237 |
| FRAS1 related extracellular matrix 1                                 | FREM1  | 713874 |
| Fascin actin-bundling protein 2, retinal                             | FSCN2  | 713824 |
| Fibronectin type III and SPRY domain containing 2                    | FSD2   | 693575 |
| Follicle stimulating hormone, beta polypeptide                       | FSHB   | 697317 |
| Follistatin                                                          | FST    | 707420 |
| Follistatin like 1                                                   | FSTL1  | 713367 |
| Ftsj RNA methyltransferase homolog 1 (E. Coli)                       | FTSJ1  | 710243 |
| Fucosidase, alpha-L- 2, plasma                                       | FUCA2  | 700611 |
| Fucokinase                                                           | FUK    | 709226 |
| FUN14 domain containing 1                                            | FUNDC1 | 709370 |
| Fucosyltransferase 8 (alpha (1,6) fucosyltransferase)                | FUT8   | 708839 |
| Fuzzy planar cell polarity protein                                   | FUZ    | 719442 |
| FXRD domain containing ion transport regulator 7                     | FXRD7  | 718457 |
| FYN proto-oncogene, Src family tyrosine kinase                       | FYN    | 574214 |
| Frizzled class receptor 6                                            | FZD6   | 694625 |
| G2/M-phase specific E3 ubiquitin protein ligase                      | G2E3   | 717021 |
| Gtpase activating protein (SH3 domain) binding protein 1             | G3BP1  | 713884 |
| Glucose 6 phosphatase, catalytic, 3                                  | G6PC3  | 714276 |
| Glucose-6-phosphate dehydrogenase                                    | G6PD   | 701137 |

|                                                                                                                            |           |           |
|----------------------------------------------------------------------------------------------------------------------------|-----------|-----------|
| GABA(A) receptor-associated protein like 2                                                                                 | GABARAPL2 | 714413    |
| Gamma-aminobutyric acid (GABA) B receptor, 1                                                                               | GABBR1    | 708987    |
| GA binding protein transcription factor, beta subunit 1                                                                    | GABPB1    | 715334    |
| Growth arrest and DNA damage inducible gamma                                                                               | GADD45G   | 697835    |
| Galactose-3-O-sulfotransferase 1                                                                                           | GAL3ST1   | 715998    |
| Galactosylceramidase                                                                                                       | GALC      | 693322    |
| Galactokinase 2                                                                                                            | GALK2     | 714866    |
| Polypeptide N-acetylgalactosaminyltransferase 1                                                                            | GALNT1    | 708930    |
| Polypeptide N-acetylgalactosaminyltransferase 14                                                                           | GALNT14   | 705068    |
| Guanidinoacetate N-methyltransferase                                                                                       | GAMT      | 721263    |
| Gigaxonin                                                                                                                  | GAN       | 713996    |
| Growth associated protein 43                                                                                               | GAP43     | 711260    |
| Glyceraldehyde-3-phosphate dehydrogenase                                                                                   | GAPDH     | 574353    |
| Phosphoribosylglycinamide formyltransferase, phosphoribosylglycinamide synthetase, phosphoribosylaminoimidazole synthetase | GART      | 704926    |
| Gastrin                                                                                                                    | GAST      | 707564    |
| Glucosidase, beta (bile acid) 2                                                                                            | GBA2      | 696062    |
| Glucan (1,4-alpha-), branching enzyme 1                                                                                    | GBE1      | 722884    |
| Gastrulation brain homeobox 2                                                                                              | GBX2      | 693901    |
| Grancalcin                                                                                                                 | GCA       | 702138    |
| Glutaryl-coa dehydrogenase                                                                                                 | GCDH      | 716935    |
| Glutamate-cysteine ligase, catalytic subunit                                                                               | GCLC      | 710508    |
| Glial cells missing homolog 1 (Drosophila)                                                                                 | GCM1      | 709965    |
| Ganglioside induced differentiation associated protein 2                                                                   | GDAP2     | 705994    |
| GDP dissociation inhibitor 2                                                                                               | GDI2      | 712510    |
| G elongation factor, mitochondrial 1                                                                                       | GFM1      | 706456    |
| G elongation factor, mitochondrial 2                                                                                       | GFM2      | 704247    |
| Glucose-fructose oxidoreductase domain containing 1                                                                        | GFOD1     | 700607    |
| Glutamine--fructose-6-phosphate transaminase 1                                                                             | GFPT1     | 574376    |
| Golgi-associated, gamma adaptin ear containing, ARF binding protein 1                                                      | GGA1      | 697929    |
| Golgi-associated, gamma adaptin ear containing, ARF binding protein 3                                                      | GGA3      | 705751    |
| Gamma-glutamylcyclotransferase                                                                                             | GGCT      | 695547    |
| Gametogenetin                                                                                                              | GGN       | 715072    |
| Gametogenetin binding protein 2                                                                                            | GGNBP2    | 713750    |
| Gamma-glutamyltransferase 5                                                                                                | GGT5      | 720345    |
| Growth hormone inducible transmembrane protein                                                                             | GHITM     | 702691    |
| GID complex subunit 4 homolog                                                                                              | GID4      | 699842    |
| GID complex subunit 8                                                                                                      | GID8      | 698189    |
| Gtpase, IMAP family member 1                                                                                               | GIMAP1    | 100424488 |
| Gtpase, IMAP family member 2                                                                                               | GIMAP2    | 713463    |
| Gtpase, IMAP family member 4                                                                                               | GIMAP4    | 713506    |
| Gtpase, IMAP family member 6                                                                                               | GIMAP6    | 713565    |
| Gtpase, IMAP family member 8                                                                                               | GIMAP8    | 713236    |
| GINS complex subunit 2 (Psf2 homolog)                                                                                      | GINS2     | 693426    |
| G protein-coupled receptor kinase interacting arfgap 2                                                                     | GIT2      | 708092    |

|                                                                           |         |           |
|---------------------------------------------------------------------------|---------|-----------|
| Gap junction protein delta 4                                              | GJD4    | 699010    |
| G kinase anchoring protein 1                                              | GKAP1   | 708816    |
| Galactosidase alpha                                                       | GLA     | 703129    |
| Glycine dehydrogenase (decarboxylating)                                   | GLDC    | 715563    |
| GLE1, RNA export mediator                                                 | GLE1    | 717474    |
| Glycosylated lysosomal membrane protein                                   | GLMP    | 719468    |
| Glutaredoxin                                                              | GLRX    | 698997    |
| Glutaredoxin 5                                                            | GLRX5   | 702989    |
| Glutaminase                                                               | GLS     | 693520    |
| Glycosyltransferase 8 domain containing 1                                 | GLT8D1  | 695999    |
| GDP-mannose 4,6-dehydratase                                               | GMDS    | 707051    |
| GEM interacting protein                                                   | GMIP    | 720380    |
| Guanosine monophosphate reductase 2                                       | GMPR2   | 715719    |
| Guanine nucleotide binding protein (G protein), alpha 11 (Gq class)       | GNA11   | 721649    |
| Guanine nucleotide binding protein (G protein), beta polypeptide 2-like 1 | GNB2L1  | 708526    |
| Guanine nucleotide binding protein (G protein), gamma 10                  | GNG10   | 708193    |
| Guanine nucleotide binding protein (G protein), gamma 11                  | GNG11   | 700606    |
| Golgin A7                                                                 | GOLGA7  | 709911    |
| Golgin B1                                                                 | GOLGB1  | 713993    |
| Golgi reassembly stacking protein 2                                       | GORASP2 | 694170    |
| Glutamic-oxaloacetic transaminase 2                                       | GOT2    | 707896    |
| Glycoprotein IX (platelet)                                                | GP9     | 704202    |
| Glycosylphosphatidylinositol anchor attachment 1                          | GPAA1   | 699887    |
| Glycerol-3-phosphate acyltransferase, mitochondrial                       | GPAM    | 696042    |
| G protein-coupled bile acid receptor 1                                    | GPBAR1  | 697937    |
| GC-rich promoter binding protein 1                                        | GPBP1   | 708322    |
| GC-rich promoter binding protein 1-like 1                                 | GPBP1L1 | 706690    |
| Glycoprotein hormone beta 5                                               | GPHB5   | 705722    |
| G protein-coupled receptor 137                                            | GPR137  | 717722    |
| G protein-coupled receptor 158                                            | GPR158  | 707065    |
| G protein-coupled receptor 171                                            | GPR171  | 709960    |
| G protein-coupled receptor 18                                             | GPR18   | 698714    |
| G protein-coupled receptor 183                                            | GPR183  | 698844    |
| G protein-coupled receptor 19                                             | GPR19   | 697072    |
| G protein-coupled receptor 31                                             | GPR31   | 717158    |
| G protein-coupled receptor 34                                             | GPR34   | 700887    |
| G protein-coupled receptor 37 (endothelin receptor type B-like)           | GPR37   | 696628    |
| G protein-coupled receptor 63                                             | GPR63   | 704888    |
| G protein-coupled receptor 89A                                            | GPR89A  | 696579    |
| G protein-coupled receptor, class C, group 5, member B                    | GPRC5B  | 695204    |
| G protein-coupled receptor, class C, group 5, member C                    | GPRC5C  | 697446    |
| G protein pathway suppressor 1                                            | GPS1    | 719343    |
| G-protein signaling modulator 1                                           | GPSM1   | 710652    |
| Glutathione peroxidase 6                                                  | GPX6    | 100286832 |
| GRB2-related adaptor protein                                              | GRAP    | 702473    |
| GRP1 (general receptor for phosphoinositides 1)-associated                | GRASP   | 696547    |

|                                                                                                                  |          |           |
|------------------------------------------------------------------------------------------------------------------|----------|-----------|
| scaffold protein                                                                                                 |          |           |
| Growth factor receptor bound protein 10                                                                          | GRB10    | 694786    |
| Glutamate receptor, ionotropic, N-methyl D-aspartate-associated protein 1 (glutamate binding)                    | GRINA    | 708234    |
| Glutamate receptor, metabotropic 8                                                                               | GRM8     | 697465    |
| Glycogen synthase kinase 3 alpha                                                                                 | GSK3A    | 707037    |
| Glutathione S-transferase alpha 4                                                                                | GSTA4    | 709666    |
| Glutathione S-transferase omega 1                                                                                | GSTO1    | 716078    |
| Glutathione S-transferase pi 1                                                                                   | GSTP1    | 721704    |
| GS homeobox 2                                                                                                    | GSX2     | 697240    |
| Glycosyltransferase like domain containing 1                                                                     | GTDC1    | 100424584 |
| General transcription factor IIA 2                                                                               | GTF2A2   | 702984    |
| General transcription factor IIB                                                                                 | GTF2B    | 694770    |
| General transcription factor IIE subunit 2                                                                       | GTF2E2   | 694622    |
| General transcription factor IIH subunit 5                                                                       | GTF2H5   | 700107    |
| GTF2I repeat domain containing 1                                                                                 | GTF2IRD1 | 693935    |
| General transcription factor IIIA                                                                                | GTF3A    | 710492    |
| General transcription factor IIIC subunit 4                                                                      | GTF3C4   | 714849    |
| General transcription factor IIIC subunit 6                                                                      | GTF3C6   | 696512    |
| Guanylate kinase 1                                                                                               | GUK1     | 695272    |
| Glycophorin C (Gerbich blood group)                                                                              | GYPE     | 712092    |
| Granzyme K                                                                                                       | GZMK     | 705477    |
| H2A histone family, member X                                                                                     | H2AFX    | 703073    |
| H2A histone family, member Y                                                                                     | H2AFY    | 711836    |
| H2A histone family, member Z                                                                                     | H2AFZ    | 709326    |
| 3-hydroxyanthranilate 3,4-dioxygenase                                                                            | HAAO     | 713101    |
| 3-hydroxyacyl-coa dehydratase 1                                                                                  | HACD1    | 700635    |
| Hydroxyacyl-coa dehydrogenase/3-ketoacyl-coa thiolase/enoyl-coa hydratase (trifunctional protein), alpha subunit | HADHA    | 695975    |
| Hydroxyacylglutathione hydrolase-like                                                                            | HAGHL    | 697846    |
| Hepcidin antimicrobial peptide                                                                                   | HAMP     | 708397    |
| Hyaluronan and proteoglycan link protein 3                                                                       | HAPLN3   | 698880    |
| Histidyl-trna synthetase 2                                                                                       | HARS2    | 697009    |
| HAUS augmin like complex subunit 8                                                                               | HAUS8    | 718874    |
| Hemoglobin subunit alpha 1                                                                                       | HBA1     | 701930    |
| Hemoglobin, beta                                                                                                 | HBB      | 715559    |
| Hemoglobin subunit epsilon 1                                                                                     | HBE1     | 715414    |
| HMG-box transcription factor 1                                                                                   | HBP1     | 699237    |
| Hematopoietic cell-specific Lyn substrate 1                                                                      | HCLS1    | 714044    |
| Hyperpolarization activated cyclic nucleotide gated potassium channel 3                                          | HCN3     | 717719    |
| Histone deacetylase 11                                                                                           | HDAC11   | 693537    |
| Histone deacetylase 3                                                                                            | HDAC3    | 704467    |
| Histone deacetylase 5                                                                                            | HDAC5    | 711456    |
| Haloacid dehalogenase like hydrolase domain containing 2                                                         | HDHD2    | 697216    |
| HEAT repeat containing 6                                                                                         | HEATR6   | 720089    |
| HEAT repeat containing 9                                                                                         | HEATR9   | 716382    |
| Heme binding protein 2                                                                                           | HEBP2    | 709176    |

|                                                                                                |           |           |
|------------------------------------------------------------------------------------------------|-----------|-----------|
| Hdc homolog, cell cycle regulator                                                              | HECA      | 702628    |
| HECT domain containing E3 ubiquitin protein ligase 1                                           | HECTD1    | 717177    |
| HECT domain containing E3 ubiquitin protein ligase 2                                           | HECTD2    | 697258    |
| HECT domain containing E3 ubiquitin protein ligase 3                                           | HECTD3    | 705051    |
| Helicase, lymphoid-specific                                                                    | HELLS     | 701598    |
| HEN1 methyltransferase homolog 1 (Arabidopsis)                                                 | HENMT1    | 698896    |
| HECT and RLD domain containing E3 ubiquitin protein ligase 3                                   | HERC3     | 703108    |
| HECT and RLD domain containing E3 ubiquitin protein ligase 4                                   | HERC4     | 695571    |
| Homocysteine-inducible, endoplasmic reticulum stress-inducible, ubiquitin-like domain member 1 | HERPUD1   | 703210    |
| Hes-related family bhlh transcription factor with YRPW motif 2                                 | HEY2      | 712988    |
| Hepatocyte growth factor-regulated tyrosine kinase substrate                                   | HGS       | 714385    |
| HIG1 hypoxia inducible domain family member 2A                                                 | HIGD2A    | 696888    |
| Hypoxia inducible lipid droplet-associated                                                     | HILPDA    | 701261    |
| Histone H4 transcription factor                                                                | HINFP     | 703763    |
| Homeodomain interacting protein kinase 1                                                       | HIPK1     | 707856    |
| HIRA interacting protein 3                                                                     | HIRIP3    | 708004    |
| Human immunodeficiency virus type I enhancer binding protein 3                                 | HIVEP3    | 696084    |
| H2.0-like homeobox                                                                             | HLX       | 705298    |
| Histocompatibility (minor) 13                                                                  | HM13      | 713216    |
| 5-hydroxymethylcytosine (hmc) binding, ES cell-specific                                        | HMCES     | 703524    |
| High mobility group box 3                                                                      | HMGB3     | 703598    |
| Heme oxygenase 1                                                                               | HMOX1     | 719266    |
| Heme oxygenase 2                                                                               | HMOX2     | 705461    |
| Hematological and neurological expressed 1                                                     | HN1       | 664729    |
| Hematological and neurological expressed 1-like                                                | HN1L      | 702283    |
| Heterogeneous nuclear ribonucleoprotein A2/B1                                                  | HNRNPA2B1 | 701821    |
| Heterogeneous nuclear ribonucleoprotein A/B                                                    | HNRNPAB   | 702509    |
| Heterogeneous nuclear ribonucleoprotein C (C1/C2)                                              | HNRNPC    | 706423    |
| Heterogeneous nuclear ribonucleoprotein H2 (H')                                                | HNRNPH2   | 703254    |
| Heterogeneous nuclear ribonucleoprotein L                                                      | HNRNPL    | 694448    |
| Heterogeneous nuclear ribonucleoprotein L-like                                                 | HNRNPLL   | 710841    |
| Hook microtubule-tethering protein 1                                                           | HOOK1     | 693504    |
| Homeobox B7                                                                                    | HOXB7     | 697089    |
| Homeobox C4                                                                                    | HOXC4     | 100430432 |
| Hematopoietic prostaglandin D synthase                                                         | HPGDS     | 705227    |
| Hermansky-Pudlak syndrome 6                                                                    | HPS6      | 712574    |
| HRAS like suppressor family member 5                                                           | HRASLS5   | 718317    |
| Heat shock factor binding protein 1                                                            | HSBP1     | 714498    |
| Hydroxysteroid (17-beta) dehydrogenase 10                                                      | HSD17B10  | 700018    |
| Hydroxysteroid (17-beta) dehydrogenase 3                                                       | HSD17B3   | 709843    |
| Hydroxysteroid (17-beta) dehydrogenase 8                                                       | HSD17B8   | 718119    |
| Heat shock transcription factor 2                                                              | HSF2      | 713938    |
| Heat shock protein 90kda alpha (cytosolic), class A member 1                                   | HSP90AA1  | 708431    |
| Heat shock protein 90kda alpha family class B member 1                                         | HSP90AB1  | 702293    |
| Heat shock protein family A (Hsp70) member 8                                                   | HSPA8     | 707989    |
| Heat shock protein family B (small) member 11                                                  | HSPB11    | 714791    |
| Heat shock protein family D (Hsp60) member 1                                                   | HSPD1     | 698024    |

|                                                                            |        |           |
|----------------------------------------------------------------------------|--------|-----------|
| Heat shock protein family H (Hsp110) member 1                              | HSPH1  | 721956    |
| Hyaluronoglucosaminidase 2                                                 | HYAL2  | 702484    |
| Isoleucyl-trna synthetase                                                  | IARS   | 677705    |
| Interactor of little elongation complex ELL subunit 2                      | ICE2   | 706347    |
| Inhibitor of DNA binding 1, dominant negative helix-loop-helix protein     | ID1    | 713160    |
| Isocitrate dehydrogenase 2 (NADP+), mitochondrial                          | IDH2   | 701480    |
| Isocitrate dehydrogenase 3 (NAD+) alpha                                    | IDH3A  | 677715    |
| Isocitrate dehydrogenase 3 (NAD+) gamma                                    | IDH3G  | 698558    |
| Interferon induced, with helicase C domain 1                               | IFIH1  | 702024    |
| Interferon induced protein with tetratricopeptide repeats 2                | IFIT2  | 695452    |
| Interferon (alpha, beta and omega) receptor 2                              | IFNAR2 | 699726    |
| Interferon, lambda receptor 1                                              | IFNLR1 | 711625    |
| Intraflagellar transport 172                                               | IFT172 | 700948    |
| Intraflagellar transport 20                                                | IFT20  | 715773    |
| Intraflagellar transport 22                                                | IFT22  | 714551    |
| Intraflagellar transport 27                                                | IFT27  | 697032    |
| Intraflagellar transport 46                                                | IFT46  | 700582    |
| Intraflagellar transport 57                                                | IFT57  | 705088    |
| Intraflagellar transport 74                                                | IFT74  | 707561    |
| Intraflagellar transport 80                                                | IFT80  | 705146    |
| Insulin like growth factor binding protein acid labile subunit             | IGFALS | 722493    |
| Insulin like growth factor binding protein 3                               | IGFBP3 | 696868    |
| Immunoglobulin superfamily member 21                                       | IGSF21 | 701539    |
| Inhibitor of kappa light polypeptide gene enhancer in B-cells, kinase beta | IKBKB  | 704683    |
| IKAROS family zinc finger 5                                                | IKZF5  | 716950    |
| Interleukin 20 receptor subunit beta                                       | IL20RB | 716769    |
| Interleukin 27 receptor subunit alpha                                      | IL27RA | 717549    |
| Interleukin enhancer binding factor 3                                      | ILF3   | 713427    |
| Integrin linked kinase                                                     | ILK    | 709944    |
| IMP3, U3 small nucleolar ribonucleoprotein                                 | IMP3   | 706202    |
| Inositol monophosphatase domain containing 1                               | IMPAD1 | 696893    |
| IMP (inosine 5'-monophosphate) dehydrogenase 1                             | IMPDH1 | 701039    |
| Internexin neuronal intermediate filament protein alpha                    | INA    | 714455    |
| Inhibitor of growth family member 2                                        | ING2   | 701839    |
| Inhibitor of growth family member 4                                        | ING4   | 722073    |
| Inhibin alpha                                                              | INHA   | 574379    |
| INO80 complex subunit C                                                    | INO80C | 708819    |
| Inositol polyphosphate-1-phosphatase                                       | INPP1  | 703301    |
| Inositol polyphosphate-4-phosphatase type II B                             | INPP4B | 699738    |
| Insulin like 3                                                             | INSL3  | 100533192 |
| Insulin like 4                                                             | INSL4  | 693911    |
| Insulin like 5                                                             | INSL5  | 699803    |
| Integrator complex subunit 12                                              | INTS12 | 694344    |
| Integrator complex subunit 2                                               | INTS2  | 712351    |
| Integrator complex subunit 8                                               | INTS8  | 700255    |
| Inturned planar cell polarity protein                                      | INTU   | 709967    |

|                                                                 |          |           |
|-----------------------------------------------------------------|----------|-----------|
| Inositol polyphosphate multikinase                              | IPMK     | 703630    |
| Importin 13                                                     | IPO13    | 702007    |
| Importin 8                                                      | IPO8     | 693514    |
| IQ motif containing with AAA domain 1                           | IQCA1    | 694173    |
| IQ motif containing B1                                          | IQCB1    | 715032    |
| IQ motif containing K                                           | IQCK     | 695417    |
| IQ motif and Sec7 domain 1                                      | IQSEC1   | 693922    |
| Interleukin 1 receptor associated kinase 1 binding protein 1    | IRAK1BP1 | 716772    |
| Interferon regulatory factor 1                                  | IRF1     | 707788    |
| Interferon regulatory factor 2                                  | IRF2     | 694347    |
| Interferon regulatory factor 2 binding protein 1                | IRF2BP1  | 715611    |
| Iroquois homeobox 5                                             | IRX5     | 697968    |
| Iron-sulfur cluster assembly enzyme                             | ISCU     | 705669    |
| Increased sodium tolerance 1 homolog (yeast)                    | IST1     | 707245    |
| Inositol-3-phosphate synthase 1                                 | ISYNA1   | 719487    |
| Integrin alpha FG-GAP repeat containing 1                       | ITFG1    | 716435    |
| Integrin subunit alpha 10                                       | ITGA10   | 100428480 |
| Integrin subunit alpha 4                                        | ITGA4    | 704745    |
| Integrin subunit beta 7                                         | ITGB7    | 699405    |
| IL2-inducible T-cell kinase                                     | ITK      | 715471    |
| Integral membrane protein 2B                                    | ITM2B    | 709896    |
| IWS1 homolog (S. Cerevisiae)                                    | IWS1     | 699205    |
| Izumo sperm-egg fusion 1                                        | IZUMO1   | 718234    |
| Janus kinase 1                                                  | JAK1     | 677689    |
| Janus kinase and microtubule interacting protein 1              | JAKMIP1  | 722750    |
| Junction adhesion molecule like                                 | JAML     | 704919    |
| JNK1/MAPK8-associated membrane protein                          | JKAMP    | 702307    |
| Junctophilin 1                                                  | JPH1     | 697014    |
| Junction plakoglobin                                            | JUP      | 707769    |
| KAT8 regulatory NSL complex subunit 1                           | KANSL1   | 717172    |
| KAT8 regulatory NSL complex subunit 3                           | KANSL3   | 706159    |
| Lysyl-trna synthetase                                           | KARS     | 714516    |
| Katanin p60 (ATPase containing) subunit A 1                     | KATNA1   | 698291    |
| Kelch repeat and BTB (POZ) domain containing 4                  | KBTBD4   | 711452    |
| Kelch repeat and BTB (POZ) domain containing 8                  | KBTBD8   | 699158    |
| Kv channel interacting protein 2                                | KCNIP2   | 712434    |
| Potassium channel, inwardly rectifying subfamily J, member 5    | KCNJ5    | 714799    |
| Potassium channel, inwardly rectifying subfamily J, member 8    | KCNJ8    | 706369    |
| Potassium channel, two pore domain subfamily K, member 16       | KCNK16   | 719585    |
| Potassium channel, subfamily K, member 4                        | KCNK4    | 717696    |
| Potassium voltage-gated channel, modifier subfamily S, member 1 | KCNS1    | 711715    |
| Potassium channel tetramerization domain containing 11          | KCTD11   | 715066    |
| Potassium channel tetramerization domain containing 17          | KCTD17   | 696210    |
| Potassium channel tetramerization domain containing 2           | KCTD2    | 700474    |
| Potassium channel tetramerization domain containing 6           | KCTD6    | 701810    |
| Potassium channel tetramerization domain containing 9           | KCTD9    | 711515    |
| KDEL motif containing 1                                         | KDELC1   | 702156    |
| KDEL endoplasmic reticulum protein retention receptor 1         | KDELR1   | 717928    |



|                                                               |           |           |
|---------------------------------------------------------------|-----------|-----------|
| KDEL endoplasmic reticulum protein retention receptor 2       | KDELR2    | 704335    |
| KDEL endoplasmic reticulum protein retention receptor 3       | KDELR3    | 700810    |
| Lysine (K)-specific demethylase 1A                            | KDM1A     | 718609    |
| Lysine (K)-specific demethylase 3A                            | KDM3A     | 697775    |
| Kell blood group, metallo-endopeptidase                       | KEL       | 703492    |
| KH homology domain containing 1                               | KHDC1     | 715576    |
| KIAA0100 ortholog                                             | KIAA0100  | 709307    |
| KIAA0141 ortholog                                             | KIAA0141  | 702802    |
| KIAA0895 ortholog                                             | KIAA0895  | 706527    |
| KIAA0907 ortholog                                             | KIAA0907  | 718005    |
| KIAA1033 ortholog                                             | KIAA1033  | 701501    |
| Mixed lineage kinase 4                                        | KIAA1804  | 712755    |
| KIAA1958 ortholog                                             | KIAA1958  | 707028    |
| Kinase D-interacting substrate 220kda                         | KIDINS220 | 693522    |
| Kinesin family member 16B                                     | KIF16B    | 695167    |
| Kinesin family member 5A                                      | KIF5A     | 711936    |
| Kinesin family member C3                                      | KIFC3     | 705951    |
| Killer-cell Ig-like receptor KIR3DL12                         | KIR3DL12  | 100125560 |
| V-kit Hardy-Zuckerman 4 feline sarcoma viral oncogene homolog | KIT       | 696759    |
| Kizuna centrosomal protein                                    | KIZ       | 700808    |
| Kinesin light chain 3                                         | KLC3      | 714331    |
| Kinesin light chain 4                                         | KLC4      | 698356    |
| Kruppel-like factor 10                                        | KLF10     | 693458    |
| Kelch domain containing 1                                     | KLHDC1    | 704472    |
| Kelch domain containing 10                                    | KLHDC10   | 702290    |
| Kelch domain containing 4                                     | KLHDC4    | 695768    |
| Kelch domain containing 9                                     | KLHDC9    | 719863    |
| Kelch like family member 11                                   | KLHL11    | 708393    |
| Kelch like family member 26                                   | KLHL26    | 719583    |
| Kelch like family member 28                                   | KLHL28    | 702075    |
| Kelch like family member 32                                   | KLHL32    | 709276    |
| Kelch like family member 36                                   | KLHL36    | 715423    |
| Kelch like family member 5                                    | KLHL5     | 698740    |
| Kelch like family member 7                                    | KLHL7     | 705349    |
| Kallikrein related peptidase 8                                | KLK8      | 719488    |
| Kallikrein B1                                                 | KLKB1     | 696639    |
| Killer cell lectin-like receptor subfamily F, member 1        | KLRF1     | 574389    |
| Lysine (K)-specific methyltransferase 5B                      | KMT5B     | 710481    |
| Lysine-rich nucleolar protein 1                               | KNOP1     | 695144    |
| Karyopherin alpha 4 (importin alpha 3)                        | KPNA4     | 702486    |
| Keratin 14, type I                                            | KRT14     | 100426176 |
| Keratin 17, type I                                            | KRT17     | 100426328 |
| Keratin 222, type II                                          | KRT222    | 701557    |
| Keratin 4, type II                                            | KRT4      | 700060    |
| Keratin 79, type II                                           | KRT79     | 700188    |
| Keratin 80, type II                                           | KRT80     | 697190    |
| Keratin associated protein 12-4                               | KRTAP12-4 | 712284    |
| Keratinocyte associated protein 3                             | KRTCAP3   | 701066    |

|                                                                                          |         |           |
|------------------------------------------------------------------------------------------|---------|-----------|
| Kxdl motif containing 1                                                                  | KXD1    | 720235    |
| L-2-hydroxyglutarate dehydrogenase                                                       | L2HGDH  | 705721    |
| Lacritin                                                                                 | LACRT   | 654418    |
| Leukocyte-associated immunoglobulin-like receptor 1                                      | LAIR1   | 695533    |
| Laminin subunit alpha 2                                                                  | LAMA2   | 715394    |
| Late endosomal/lysosomal adaptor, MAPK and MTOR activator 1                              | LAMTOR1 | 718249    |
| Late endosomal/lysosomal adaptor, MAPK and MTOR activator 3                              | LAMTOR3 | 709133    |
| Lysosomal protein transmembrane 4 alpha                                                  | LAPTM4A | 701298    |
| Like-glycosyltransferase                                                                 | LARGE   | 717403    |
| La ribonucleoprotein domain family member 6                                              | LARP6   | 699664    |
| La ribonucleoprotein domain family member 7                                              | LARP7   | 703731    |
| LIM and SH3 protein 1                                                                    | LASP1   | 694950    |
| Lamin B receptor                                                                         | LBR     | 700801    |
| Late cornified envelope 4A                                                               | LCE4A   | 100423936 |
| LCK proto-oncogene, Src family tyrosine kinase                                           | LCK     | 717704    |
| Lipocalin 1                                                                              | LCN1    | 711974    |
| Lipocalin 6                                                                              | LCN6    | 574148    |
| Lymphocyte cytosolic protein 2                                                           | LCP2    | 700374    |
| Lipid droplet associated hydrolase                                                       | LDAH    | 717510    |
| Lactate dehydrogenase B                                                                  | LDHB    | 706110    |
| Leucine zipper, down-regulated in cancer 1-like                                          | LDLOC1L | 712760    |
| Lymphoid enhancer-binding factor 1                                                       | LEF1    | 695776    |
| Leucine, glutamate and lysine rich 1                                                     | LEKR1   | 705456    |
| LEM domain containing 2                                                                  | LEMD2   | 718463    |
| Lectin, galactoside-binding, soluble, 14                                                 | LGALS14 | 698227    |
| LIM homeobox 5                                                                           | LHX5    | 713417    |
| LIM homeobox 6                                                                           | LHX6    | 698587    |
| Ligase III, DNA, ATP-dependent                                                           | LIG3    | 715181    |
| Ligase IV, DNA, ATP-dependent                                                            | LIG4    | 695475    |
| Leukocyte immunoglobulin-like receptor, subfamily B (with TM and ITIM domains), member 1 | LILRB1  | 692340    |
| LIM and senescent cell antigen-like domains 2                                            | LIMS2   | 699463    |
| Lin-9 DREAM muvb core complex component                                                  | LIN9    | 699056    |
| Leucine rich repeat and Ig domain containing 2                                           | LINGO2  | 706386    |
| Lines homolog 1                                                                          | LINS1   | 693833    |
| Lipase A, lysosomal acid, cholesterol esterase                                           | LIPA    | 695240    |
| Lipase, family member J                                                                  | LIPJ    | 693463    |
| Lectin, mannose-binding, 1                                                               | LMAN1   | 697449    |
| Lamin A/C                                                                                | LMNA    | 719414    |
| Leucyl/cystinyl aminopeptidase                                                           | LNPEP   | 703949    |
| Ligand of numb-protein X 1, E3 ubiquitin protein ligase                                  | LNK1    | 697862    |
| Lysyl oxidase like 1                                                                     | LOXL1   | 706464    |
| Lysyl oxidase like 3                                                                     | LOXL3   | 709834    |
| Lysophosphatidic acid receptor 6                                                         | LPAR6   | 705081    |
| Lysophosphatidylcholine acyltransferase 4                                                | LPCAT4  | 696388    |
| Lactoperoxidase                                                                          | LPO     | 709848    |
| Leupaxin                                                                                 | LPXN    | 702033    |
| Leucine rich repeat and fibronectin type III domain containing 4                         | LRFN4   | 713166    |

|                                                                      |          |           |
|----------------------------------------------------------------------|----------|-----------|
| Leucine rich repeat and fibronectin type III domain containing 5     | LRFN5    | 700512    |
| Ligand dependent nuclear receptor interacting factor 1               | LRIF1    | 702445    |
| Leucine-rich repeat, immunoglobulin-like and transmembrane domains 1 | LRIT1    | 698385    |
| LDL receptor related protein 1                                       | LRP1     | 710965    |
| LDL receptor related protein 11                                      | LRP11    | 697652    |
| LDL receptor related protein 2                                       | LRP2     | 705786    |
| Leucine rich repeat containing 14                                    | LRRC14   | 703587    |
| Leucine rich repeat containing 20                                    | LRRC20   | 710594    |
| Leucine rich repeat containing 25                                    | LRRC25   | 719475    |
| Leucine rich repeat containing 4                                     | LRRC4    | 698610    |
| Leucine rich repeat containing 40                                    | LRRC40   | 702565    |
| Leucine rich repeat containing 42                                    | LRRC42   | 714839    |
| Leucine rich repeat containing 56                                    | LRRC56   | 698952    |
| Leucine rich repeat containing 57                                    | LRRC57   | 711785    |
| Leucine-rich repeat containing 8 family member D                     | LRRC8D   | 100423128 |
| Leucine rich repeat and coiled-coil centrosomal protein 1            | LRRCC1   | 707964    |
| Leucine-rich repeats and WD repeat domain containing 1               | LRWD1    | 715187    |
| LSM10, U7 small nuclear RNA associated                               | LSM10    | 713277    |
| LSM14A mrna processing body assembly factor                          | LSM14A   | 705085    |
| LSM family member 14B                                                | LSM14B   | 700561    |
| LSM2 homolog, U6 small nuclear RNA and mrna degradation associated   | LSM2     | 715592    |
| LSM6 homolog, U6 small nuclear RNA and mrna degradation associated   | LSM6     | 703226    |
| Lymphotoxin alpha                                                    | LTA      | 715425    |
| LUC7-like 3 pre-mrna splicing factor                                 | LUC7L3   | 703662    |
| Latexin                                                              | LXN      | 703996    |
| Lymphocyte antigen 6 complex, locus D                                | LY6D     | 695450    |
| Lymphocyte antigen 6 complex, locus G6C                              | LY6G6C   | 716220    |
| Lymphocyte antigen 86                                                | LY86     | 711507    |
| Ly6/neurotoxin 1                                                     | LYNX1    | 100428512 |
| LY6/PLAUR domain containing 3                                        | LYPD3    | 718197    |
| LY6/PLAUR domain containing 4                                        | LYPD4    | 706070    |
| Lysophospholipase II                                                 | LYPLA2   | 719074    |
| Meiosis 1 associated protein                                         | M1AP     | 710210    |
| MAD2L1 binding protein                                               | MAD2L1BP | 701099    |
| MAP-kinase activating death domain                                   | MADD     | 713613    |
| Macrophage erythroblast attacher                                     | MAEA     | 702015    |
| MAGE family member D1                                                | MAGED1   | 696658    |
| MAGE family member F1                                                | MAGEF1   | 701676    |
| MAGE family member H1                                                | MAGEH1   | 703812    |
| Mal, T-cell differentiation protein-like                             | MALL     | 696102    |
| Mitochondrial assembly of ribosomal large subunit 1                  | MALSU1   | 704884    |
| Mastermind like transcriptional coactivator 1                        | MAML1    | 715047    |
| Major histocompatibility complex, class II, DM alpha                 | MAMU-DMA | 717870    |
| Major histocompatibility complex, class II, DM beta                  | MAMU-DMB | 100429856 |
| Major histocompatibility complex, class II, DP alpha                 | MAMU-DPA | 717992    |

|                                                                   |          |           |
|-------------------------------------------------------------------|----------|-----------|
| Major histocompatibility complex, class II, DP beta               | MAMU-DPB | 717969    |
| Mannosidase, alpha, class 2C, member 1                            | MAN2C1   | 705599    |
| Microtubule associated protein 1S                                 | MAP1S    | 719196    |
| Mitogen-activated protein kinase kinase 1                         | MAP2K1   | 710415    |
| Mitogen-activated protein kinase kinase 4                         | MAP2K4   | 718155    |
| Mitogen-activated protein kinase kinase 5                         | MAP2K5   | 711672    |
| Mitogen-activated protein kinase kinase kinase 14                 | MAP3K14  | 716258    |
| Mitogen-activated protein kinase kinase kinase 3                  | MAP3K3   | 717866    |
| Mitogen-activated protein kinase kinase kinase 4                  | MAP3K4   | 710360    |
| Mitogen-activated protein kinase kinase kinase 5                  | MAP3K5   | 711382    |
| Mitogen-activated protein kinase kinase kinase 6                  | MAP3K6   | 715911    |
| Microtubule associated protein 4                                  | MAP4     | 100423616 |
| Mitogen-activated protein kinase kinase kinase kinase 4           | MAP4K4   | 716595    |
| Mitogen-activated protein kinase kinase kinase kinase 5           | MAP4K5   | 706204    |
| MAP7 domain containing 1                                          | MAP7D1   | 712899    |
| Mitogen-activated protein kinase 1                                | MAPK1    | 698569    |
| Mitogen-activated protein kinase 12                               | MAPK12   | 715745    |
| Mitogen-activated protein kinase-activated protein kinase 2       | MAPKAPK2 | 695044    |
| Mitogen-activated protein kinase-activated protein kinase 5       | MAPKAPK5 | 713521    |
| Microtubule associated protein RP/EB family member 1              | MAPRE1   | 711404    |
| Microtubule associated protein RP/EB family member 2              | MAPRE2   | 707996    |
| Myristoylated alanine-rich protein kinase C substrate             | MARCKS   | 694077    |
| MARCKS-like 1                                                     | MARCKSL1 | 100428616 |
| MAP/microtubule affinity-regulating kinase 2                      | MARK2    | 718065    |
| Methionyl-trna synthetase                                         | MARS     | 714744    |
| Microtubule associated serine/threonine kinase like               | MASTL    | 708134    |
| Matrin 3                                                          | MATR3    | 100568448 |
| MYC associated factor X                                           | MAX      | 708228    |
| Methyl-cpg binding domain 4 DNA glycosylase                       | MBD4     | 720557    |
| Methyl-cpg binding domain protein 5                               | MBD5     | 721892    |
| Muscleblind like splicing regulator 1                             | MBNL1    | 708735    |
| Malonyl-coa-acyl carrier protein transacylase                     | MCAT     | 711556    |
| Myeloid cell leukemia 1                                           | MCL1     | 707539    |
| Minichromosome maintenance complex component 3 associated protein | MCM3AP   | 721810    |
| Minichromosome maintenance complex binding protein                | MCMBP    | 704028    |
| Multiple C2 domains, transmembrane 2                              | MCTP2    | 706949    |
| Malate dehydrogenase 1                                            | MDH1     | 694703    |
| MDM2 proto-oncogene, E3 ubiquitin protein ligase                  | MDM2     | 718284    |
| MYST/Esa1-associated factor 6                                     | MEAF6    | 713666    |
| Mediator complex subunit 13-like                                  | MED13L   | 713867    |
| Mediator complex subunit 19                                       | MED19    | 704421    |
| Mediator complex subunit 21                                       | MED21    | 710699    |
| Mediator complex subunit 23                                       | MED23    | 714629    |
| Mediator complex subunit 6                                        | MED6     | 693320    |
| Myocyte enhancer factor 2C                                        | MEF2C    | 694992    |
| Meis homeobox 1                                                   | MEIS1    | 697685    |
| Meis homeobox 2                                                   | MEIS2    | 699748    |

|                                                                                         |          |           |
|-----------------------------------------------------------------------------------------|----------|-----------|
| Mediator of cell motility 1                                                             | MEMO1    | 706051    |
| Matrix extracellular phosphoglycoprotein                                                | MEPE     | 701943    |
| Mesoderm specific transcript                                                            | MEST     | 703327    |
| MET proto-oncogene, receptor tyrosine kinase                                            | MET      | 704562    |
| Methionyl aminopeptidase 2                                                              | METAP2   | 712400    |
| Methyltransferase like 1                                                                | METTL1   | 715796    |
| Methyltransferase like 13                                                               | METTL13  | 704943    |
| Methyltransferase like 18                                                               | METTL18  | 701890    |
| Methyltransferase like 22                                                               | METTL22  | 708739    |
| Microfibrillar associated protein 1                                                     | MFAP1    | 711111    |
| Membrane frizzled-related protein                                                       | MFRP     | 704965    |
| Major facilitator superfamily domain containing 11                                      | MFSD11   | 707770    |
| Major facilitator superfamily domain containing 14A                                     | MFSD14A  | 711233    |
| Major facilitator superfamily domain containing 3                                       | MFSD3    | 703246    |
| Mannosyl (alpha-1,6-)-glycoprotein beta-1,2-N-acetyl glucosaminyltransferase            | MGAT2    | 706426    |
| Mannosyl (alpha-1,3-)-glycoprotein beta-1,4-N-acetyl glucosaminyltransferase, isozyme B | MGAT4B   | 705006    |
| Mannosyl (alpha-1,6-)-glycoprotein beta-1,6-N-acetyl-glucosaminyltransferase, isozyme B | MGAT5B   | 708299    |
| Meningioma expressed antigen 5 (hyaluronidase)                                          | MGEA5    | 712370    |
| Mitochondrial genome maintenance exonuclease 1                                          | MGME1    | 696467    |
| O-6-methylguanine-DNA methyltransferase                                                 | MGMT     | 698134    |
| Microsomal glutathione S-transferase 2                                                  | MGST2    | 697983    |
| Midline 1                                                                               | MID1     | 709683    |
| Midline 2                                                                               | MID2     | 703281    |
| Midnolin                                                                                | MIDN     | 721215    |
| Mitochondrial elongation factor 2                                                       | MIEF2    | 700705    |
| MIF4G domain containing                                                                 | MIF4GD   | 706005    |
| Missing oocyte, meiosis regulator, homolog (Drosophila)                                 | MIOS     | 696371    |
| Mitochondrial intermediate peptidase                                                    | MIPEP    | 707131    |
| Mckusick-Kaufman syndrome                                                               | MKKS     | 718547    |
| Myeloid leukemia factor 1                                                               | MLF1     | 704116    |
| Mutl homolog 1                                                                          | MLH1     | 698782    |
| Myeloid/lymphoid or mixed-lineage leukemia; translocated to, 6                          | MLLT6    | 694045    |
| Methylmalonic aciduria (cobalamin deficiency) cblb type                                 | MMAB     | 708973    |
| Methylmalonic aciduria (cobalamin deficiency) cbld type, with homocystinuria            | MMADHC   | 693783    |
| Meningioma (disrupted in balanced translocation) 1                                      | MN1      | 107000624 |
| MNAT CDK-activating kinase assembly factor 1                                            | MNAT1    | 703905    |
| MOB family member 4, phocein                                                            | MOB4     | 698149    |
| Mannosyl-oligosaccharide glucosidase                                                    | MOGS     | 708913    |
| MON1 homolog B, secretory trafficking associated                                        | MON1B    | 715104    |
| Mortality factor 4 like 1                                                               | MORF4L1  | 711357    |
| MORN repeat containing 2                                                                | MORN2    | 106992912 |
| M-phase phosphoprotein 6                                                                | MPHOSPH6 | 714335    |
| Mannose phosphate isomerase                                                             | MPI      | 722129    |
| M-phase specific PLK1 interacting protein                                               | MPLKIP   | 703092    |

|                                                      |          |        |
|------------------------------------------------------|----------|--------|
| Membrane protein, palmitoylated 1                    | MPP1     | 702092 |
| Mpv17 mitochondrial inner membrane protein           | MPV17    | 701026 |
| Myelin protein zero-like 2                           | MPZL2    | 699330 |
| Melanocortin 2 receptor accessory protein            | MRAP     | 701330 |
| Muscle RAS oncogene homolog                          | MRAS     | 716352 |
| Mannose receptor, C type 1                           | MRC1     | 701010 |
| MRE11 homolog A, double strand break repair nuclease | MRE11A   | 697566 |
| Morf4 family associated protein 1-like 1             | MRFAP1L1 | 710411 |
| Mitochondrial ribosomal protein L10                  | MRPL10   | 695136 |
| Mitochondrial ribosomal protein L11                  | MRPL11   | 714094 |
| Mitochondrial ribosomal protein L16                  | MRPL16   | 698831 |
| Mitochondrial ribosomal protein L17                  | MRPL17   | 697086 |
| Mitochondrial ribosomal protein L19                  | MRPL19   | 711081 |
| Mitochondrial ribosomal protein L20                  | MRPL20   | 701533 |
| Mitochondrial ribosomal protein L22                  | MRPL22   | 714920 |
| Mitochondrial ribosomal protein L24                  | MRPL24   | 718640 |
| Mitochondrial ribosomal protein L37                  | MRPL37   | 715168 |
| Mitochondrial ribosomal protein L39                  | MRPL39   | 708631 |
| Mitochondrial ribosomal protein L42                  | MRPL42   | 715676 |
| Mitochondrial ribosomal protein L46                  | MRPL46   | 697872 |
| Mitochondrial ribosomal protein L50                  | MRPL50   | 713923 |
| Mitochondrial ribosomal protein L51                  | MRPL51   | 713036 |
| Mitochondrial ribosomal protein L55                  | MRPL55   | 695962 |
| Mitochondrial ribosomal protein S11                  | MRPS11   | 697743 |
| Mitochondrial ribosomal protein S17                  | MRPS17   | 703678 |
| Mitochondrial ribosomal protein S18A                 | MRPS18A  | 701465 |
| Mitochondrial ribosomal protein S18C                 | MRPS18C  | 707257 |
| Mitochondrial ribosomal protein S21                  | MRPS21   | 706805 |
| Mitochondrial ribosomal protein S22                  | MRPS22   | 715845 |
| Mitochondrial ribosomal protein S33                  | MRPS33   | 693681 |
| Murine retrovirus integration site 1 homolog         | MRVI1    | 702830 |
| Membrane-spanning 4-domains, subfamily A, member 1   | MS4A1    | 696843 |
| Membrane-spanning 4-domains, subfamily A, member 4A  | MS4A4A   | 698027 |
| Membrane-spanning 4-domains, subfamily A, member 7   | MS4A7    | 697200 |
| Myb/SANT-like DNA-binding domain containing 2        | MSANTD2  | 712347 |
| Male-specific lethal 3 homolog (Drosophila)          | MSL3     | 720836 |
| Methionine sulfoxide reductase A                     | MSRA     | 698628 |
| MSS51 mitochondrial translational activator          | MSS51    | 707066 |
| Msh homeobox 2                                       | MSX2     | 694227 |
| Metallothionein 1J                                   | MT1J     | 708785 |
| Metallothionein-1M                                   | MT1M     | 708679 |
| Metallothionein 1X                                   | MT1X     | 709905 |
| Metallothionein 2A                                   | MT2A     | 700719 |
| Metastasis associated 1 family member 2              | MTA2     | 718772 |
| Metastasis associated 1 family member 3              | MTA3     | 712967 |
| MDM2 binding protein                                 | MTBP     | 703121 |
| Metadherin                                           | MTDH     | 702410 |
| Mitochondrial transcription termination factor 3     | MTERF3   | 701366 |

|                                                                                                                                               |        |        |
|-----------------------------------------------------------------------------------------------------------------------------------------------|--------|--------|
| Metal response element binding transcription factor 2                                                                                         | MTF2   | 707104 |
| Mitochondrial fission regulator 1                                                                                                             | MTFR1  | 711143 |
| Mitochondrial fission regulator 1-like                                                                                                        | MTFR1L | 713213 |
| Methylenetetrahydrofolate dehydrogenase (NADP+ dependent) 1,<br>methenyltetrahydrofolate cyclohydrolase, formyltetrahydrofolate<br>synthetase | MTHFD1 | 707059 |
| Mitochondrial translational initiation factor 2                                                                                               | MTIF2  | 717042 |
| Myotubularin 1                                                                                                                                | MTM1   | 703131 |
| Myotubularin related protein 11                                                                                                               | MTMR11 | 705542 |
| Myotubularin related protein 2                                                                                                                | MTMR2  | 699703 |
| Myotubularin related protein 4                                                                                                                | MTMR4  | 714621 |
| Myotubularin related protein 6                                                                                                                | MTMR6  | 709118 |
| Myotubularin related protein 8                                                                                                                | MTMR8  | 708037 |
| Mitochondrial trna translation optimization 1                                                                                                 | MTO1   | 717688 |
| Mitochondrial poly(A) polymerase                                                                                                              | MTPAP  | 694491 |
| Mitochondrial E3 ubiquitin protein ligase 1                                                                                                   | MUL1   | 705429 |
| Muty DNA glycosylase                                                                                                                          | MUTYH  | 705651 |
| MAX dimerization protein 1                                                                                                                    | MXD1   | 701784 |
| Myosin binding protein C, slow type                                                                                                           | MYBPC1 | 696955 |
| Myeloid differentiation primary response 88                                                                                                   | MYD88  | 696494 |
| Myoneurin                                                                                                                                     | MYNN   | 698094 |
| Myosin IF                                                                                                                                     | MYO1F  | 712101 |
| Myoferlin                                                                                                                                     | MYOF   | 700922 |
| Myomesin 2                                                                                                                                    | MYOM2  | 716555 |
| Myozenin 1                                                                                                                                    | MYOZ1  | 706768 |
| Myelin regulatory factor                                                                                                                      | MYRF   | 719083 |
| Mitotic spindle organizing protein 2B                                                                                                         | MZT2B  | 701787 |
| N(alpha)-acetyltransferase 30, natc catalytic subunit                                                                                         | NAA30  | 699379 |
| N(alpha)-acetyltransferase 50, nate catalytic subunit                                                                                         | NAA50  | 709764 |
| N(alpha)-acetyltransferase 60, natf catalytic subunit                                                                                         | NAA60  | 703207 |
| NGFI-A binding protein 1                                                                                                                      | NAB1   | 693274 |
| NGFI-A binding protein 2 (EGR1 binding protein 2)                                                                                             | NAB2   | 714209 |
| Nucleic acid binding protein 1                                                                                                                | NABP1  | 694172 |
| Nascent polypeptide-associated complex alpha subunit                                                                                          | NACA   | 713416 |
| NACC family member 2, BEN and BTB (POZ) domain containing                                                                                     | NACC2  | 721794 |
| NEDD8 activating enzyme E1 subunit 1                                                                                                          | NAE1   | 696429 |
| N-acetylglucosamine kinase                                                                                                                    | NAGK   | 703976 |
| N-acetylglucosamine-1-phosphodiester alpha-N-acetyl<br>glucosaminidase                                                                        | NAGPA  | 707352 |
| Nucleosome assembly protein 1-like 5                                                                                                          | NAP1L5 | 703223 |
| NSF attachment protein alpha                                                                                                                  | NAPA   | 717355 |
| N-acetyltransferase 10 (GCN5-related)                                                                                                         | NAT10  | 717452 |
| N-acetyltransferase 8 (GCN5-related, putative)                                                                                                | NAT8   | 706820 |
| Neuron navigator 3                                                                                                                            | NAV3   | 694815 |
| Neural cell adhesion molecule 1                                                                                                               | NCAM1  | 693789 |
| Non-SMC condensin I complex subunit D2                                                                                                        | NCAPD2 | 712834 |
| Non-SMC condensin II complex subunit D3                                                                                                       | NCAPD3 | 700276 |
| Non-SMC condensin I complex subunit G                                                                                                         | NCAPG  | 715235 |

|                                                                      |         |           |
|----------------------------------------------------------------------|---------|-----------|
| Neurochondrin                                                        | NCDN    | 712930    |
| Neutrophil cytosolic factor 1                                        | NCF1    | 694207    |
| Neutrophil cytosolic factor 4                                        | NCF4    | 695612    |
| NCK adaptor protein 2                                                | NCK2    | 713287    |
| NCK-associated protein 1                                             | NCKAP1  | 711124    |
| NCK interacting protein with SH3 domain                              | NCKIPSD | 709410    |
| Nuclear receptor coactivator 2                                       | NCOA2   | 693455    |
| Nuclear receptor coactivator 4                                       | NCOA4   | 709509    |
| Nuclear receptor coactivator 6                                       | NCOA6   | 706903    |
| Nicastrin                                                            | NCSTN   | 719696    |
| NADH:ubiquinone oxidoreductase subunit A1                            | NDUFA1  | 694635    |
| NADH:ubiquinone oxidoreductase subunit A12                           | NDUFA12 | 711970    |
| NADH:ubiquinone oxidoreductase subunit A8                            | NDUFA8  | 698706    |
| NADH:ubiquinone oxidoreductase subunit AB1                           | NDUFAB1 | 700718    |
| NADH:ubiquinone oxidoreductase complex assembly factor 1             | NDUFAF1 | 710275    |
| NADH:ubiquinone oxidoreductase complex assembly factor 2             | NDUFAF2 | 693441    |
| NADH:ubiquinone oxidoreductase complex assembly factor 4             | NDUFAF4 | 705102    |
| NADH:ubiquinone oxidoreductase complex assembly factor 6             | NDUFAF6 | 700515    |
| NADH:ubiquinone oxidoreductase complex assembly factor 7             | NDUFAF7 | 709473    |
| NADH:ubiquinone oxidoreductase subunit B2                            | NDUFB2  | 693431    |
| NADH:ubiquinone oxidoreductase subunit B4                            | NDUFB4  | 713428    |
| NADH:ubiquinone oxidoreductase subunit B8                            | NDUFB8  | 710521    |
| NADH:ubiquinone oxidoreductase subunit B9                            | NDUFB9  | 711387    |
| NADH:ubiquinone oxidoreductase core subunit S2                       | NDUFS2  | 719935    |
| NADH:ubiquinone oxidoreductase core subunit S3                       | NDUFS3  | 713040    |
| NADH:ubiquinone oxidoreductase subunit S4                            | NDUFS4  | 704137    |
| Nebulette                                                            | NEBL    | 702764    |
| N-terminal EF-hand calcium binding protein 1                         | NECAB1  | 696533    |
| NECAP endocytosis associated 2                                       | NECAP2  | 698687    |
| Neural precursor cell expressed, developmentally down-regulated 1    | NEDD1   | 713673    |
| NIMA-related kinase 1                                                | NEK1    | 694345    |
| NIMA-related kinase 3                                                | NEK3    | 710127    |
| NIMA-related kinase 7                                                | NEK7    | 710464    |
| Negative elongation factor complex member C/D                        | NELFCD  | 696053    |
| Negative elongation factor complex member E                          | NELFE   | 716913    |
| Nuclear envelope integral membrane protein 1                         | NEMP1   | 710700    |
| Neuraminidase 1 (lysosomal sialidase)                                | NEU1    | 716740    |
| Neuronal differentiation 2                                           | NEUROD2 | 696976    |
| Neurofibromin 2 (merlin)                                             | NF2     | 714945    |
| Nuclear factor, erythroid 2                                          | NFE2    | 705061    |
| Nuclear factor, erythroid 2 like 1                                   | NFE2L1  | 695404    |
| Nuclear factor, erythroid 2 like 2                                   | NFE2L2  | 707606    |
| Nuclear factor I/A                                                   | NFIA    | 694022    |
| Nuclear factor of kappa light polypeptide gene enhancer in B-cells 1 | NFKB1   | 710324    |
| Nuclear transcription factor Y subunit gamma                         | NFYC    | 696290    |
| Nerve growth factor receptor                                         | NGFR    | 574304    |
| Nerve growth factor receptor (TNFRSF16) associated protein 1         | NGFRAP1 | 100428976 |
| N-glycanase 1                                                        | NGLY1   | 700842    |



|                                                                    |         |           |
|--------------------------------------------------------------------|---------|-----------|
| Ninein                                                             | NIN     | 709532    |
| Non imprinted in Prader-Willi/Angelman syndrome 2                  | NIPA2   | 710147    |
| NK2 homeobox 5                                                     | NKX2-5  | 703795    |
| Neurolysin (metallopeptidase M3 family)                            | NLN     | 696884    |
| NLR family, pyrin domain containing 1                              | NLRP1   | 721648    |
| NLR family, pyrin domain containing 6                              | NLRP6   | 720741    |
| NMD3 ribosome export adaptor                                       | NMD3    | 701677    |
| NME/NM23 nucleoside diphosphate kinase 2                           | NME2    | 100533960 |
| N-myc and STAT interactor                                          | NMI     | 694554    |
| N-myristoyltransferase 1                                           | NMT1    | 715885    |
| Nicotinamide nucleotide transhydrogenase                           | NNT     | 701110    |
| Nitric oxide associated 1                                          | NOA1    | 693437    |
| NIN1/RPN12 binding protein 1 homolog                               | NOB1    | 705344    |
| Nucleolar protein 8                                                | NOL8    | 705799    |
| Non-POU domain containing, octamer-binding                         | NONO    | 697263    |
| NOP16 nucleolar protein                                            | NOP16   | 696768    |
| NOP58 ribonucleoprotein                                            | NOP58   | 703859    |
| Notch 4                                                            | NOTCH4  | 717323    |
| Nuclear pore associated protein 1                                  | NPAP1   | 719891    |
| Neuronal PAS domain protein 3                                      | NPAS3   | 717281    |
| Niemann-Pick disease, type C2                                      | NPC2    | 699881    |
| Natriuretic peptide receptor 2                                     | NPR2    | 695750    |
| Neuroplastin                                                       | NPTN    | 699627    |
| Neuronal pentraxin I                                               | NPTX1   | 718259    |
| NAD(P)H dehydrogenase, quinone 2                                   | NQO2    | 707675    |
| Nuclear receptor subfamily 1 group I member 2                      | NR1I2   | 574226    |
| Nuclear receptor subfamily 2 group F member 2                      | NR2F2   | 707483    |
| Nuclear receptor subfamily 2 group F member 6                      | NR2F6   | 719699    |
| Nuclear receptor subfamily 5 group A member 1                      | NR5A1   | 694183    |
| Neuronal cell adhesion molecule                                    | NRCAM   | 574228    |
| NRDE-2, necessary for RNA interference, domain containing          | NRDE2   | 695676    |
| Neuritin 1                                                         | NRN1    | 722968    |
| Neuropilin 1                                                       | NRP1    | 697755    |
| NSA2, ribosome biogenesis homolog                                  | NSA2    | 704670    |
| Nuclear receptor binding SET domain protein 1                      | NSD1    | 706131    |
| NAD(P) dependent steroid dehydrogenase-like                        | NSDHL   | 693333    |
| NSFL1 (p97) cofactor (p47)                                         | NSFL1C  | 715743    |
| NSE4 homolog A, SMC5-SMC6 complex component                        | NSMCE4A | 705375    |
| 5'-nucleotidase, cytosolic IIIA                                    | NT5C3A  | 708743    |
| N-terminal Xaa-Pro-Lys N-methyltransferase 1                       | NTMT1   | 716763    |
| NUAK family, SNF1-like kinase, 1                                   | NUAK1   | 702256    |
| Negative regulator of ubiquitin-like proteins 1                    | NUB1    | 715231    |
| Nucleobindin 2                                                     | NUCB2   | 697084    |
| Nuclear casein kinase and cyclin-dependent kinase substrate 1      | NUCKS1  | 697298    |
| Nudix hydrolase 1                                                  | NUDT1   | 713078    |
| Nudix hydrolase 13                                                 | NUDT13  | 707796    |
| Nudix hydrolase 5                                                  | NUDT5   | 694368    |
| Nuclear fragile X mental retardation protein interacting protein 2 | NUFIP2  | 711330    |

|                                                                           |         |           |
|---------------------------------------------------------------------------|---------|-----------|
| Nucleoporin 107kda                                                        | NUP107  | 718214    |
| Nucleoporin 205kda                                                        | NUP205  | 708216    |
| Nucleoporin 210kda                                                        | NUP210  | 693669    |
| Nucleoporin 35kda                                                         | NUP35   | 706497    |
| Nucleoporin 50kda                                                         | NUP50   | 713282    |
| Nucleoporin 85kda                                                         | NUP85   | 705628    |
| Nucleoporin 88kda                                                         | NUP88   | 711734    |
| Nuclear RNA export factor 1                                               | NXF1    | 718420    |
| Neurexophilin and PC-esterase domain family member 3                      | NXPE3   | 702612    |
| Nuclear transport factor 2-like export factor 1                           | NXT1    | 711846    |
| Nuclear transport factor 2-like export factor 2                           | NXT2    | 704593    |
| O-acyl-ADP-ribose deacylase 1                                             | OARD1   | 719685    |
| Ornithine aminotransferase                                                | OAT     | 693970    |
| Ornithine decarboxylase antizyme 1                                        | OAZ1    | 721477    |
| Oligonucleotide/oligosaccharide-binding fold containing 1                 | OBFC1   | 714968    |
| Occludin                                                                  | OCLN    | 700504    |
| Oculocerebrorenal syndrome of Lowe                                        | OCRL    | 702345    |
| Outer dense fiber of sperm tails 1                                        | ODF1    | 707269    |
| Outer dense fiber of sperm tails 2                                        | ODF2    | 717505    |
| Oral-facial-digital syndrome 1                                            | OFD1    | 711677    |
| 8-oxoguanine DNA glycosylase                                              | OGG1    | 700481    |
| Olfactomedin like 3                                                       | OLFML3  | 707969    |
| Oligodendrocyte lineage transcription factor 2                            | OLIG2   | 700098    |
| Oxidized low density lipoprotein (lectin-like) receptor 1                 | OLR1    | 717596    |
| Olfactory marker protein                                                  | OMP     | 698210    |
| Optic atrophy 3 (autosomal recessive, with chorea and spastic paraplegia) | OPA3    | 714806    |
| Opioid binding protein/cell adhesion molecule-like                        | OPCML   | 693404    |
| Olfactory receptor, family 10, subfamily G, member 7                      | OR10G7  | 714975    |
| Olfactory receptor, family 2, subfamily AG, member 2                      | OR2AG2  | 709556    |
| Olfactory receptor, family 2, subfamily F, member 1                       | OR2F1   | 707900    |
| Olfactory receptor, family 2, subfamily H, member 2                       | OR2H2   | 710946    |
| Olfactory receptor, family 2, subfamily W, member 1                       | OR2W1   | 708515    |
| Olfactory receptor, family 51, subfamily A, member 4                      | OR51A4  | 100425536 |
| Olfactory receptor, family 6, subfamily N, member 1                       | OR6N1   | 719958    |
| Olfactory receptor, family 7, subfamily D, member 4                       | OR7D4   | 721322    |
| ORAI calcium release-activated calcium modulator 1                        | ORAI1   | 700190    |
| ORAI calcium release-activated calcium modulator 2                        | ORAI2   | 714917    |
| Origin recognition complex subunit 3                                      | ORC3    | 700773    |
| Origin recognition complex subunit 5                                      | ORC5    | 696683    |
| ORMDL sphingolipid biosynthesis regulator 2                               | ORMDL2  | 710296    |
| ORMDL sphingolipid biosynthesis regulator 3                               | ORMDL3  | 699154    |
| Osteosarcoma amplified 9, endoplasmic reticulum lectin                    | OS9     | 715555    |
| Oxysterol binding protein like 10                                         | OSBPL10 | 703555    |
| Oxysterol binding protein like 11                                         | OSBPL11 | 716096    |
| Oxysterol binding protein like 8                                          | OSBPL8  | 693338    |
| Oncostatin M                                                              | OSM     | 717994    |
| Otopetrin 1                                                               | OTOP1   | 712780    |

|                                                                   |        |           |
|-------------------------------------------------------------------|--------|-----------|
| OTU domain containing 6B                                          | OTUD6B | 697015    |
| OTU deubiquitinase with linear linkage specificity                | OTULIN | 698991    |
| Oviductal glycoprotein 1                                          | OVGP1  | 703848    |
| 3-oxoacyl-ACP synthase, mitochondrial                             | OXSM   | 703382    |
| Purinergic receptor P2Y, G-protein coupled, 11                    | P2RY11 | 100533472 |
| Purinergic receptor P2Y, G-protein coupled, 13                    | P2RY13 | 106997048 |
| Pyrimidinergic receptor P2Y, G-protein coupled, 6                 | P2RY6  | 718623    |
| Proteasomal ATPase associated factor 1                            | PAAF1  | 718755    |
| Poly(A) binding protein, cytoplasmic 1                            | PABPC1 | 705847    |
| Peptidyl arginine deiminase, type IV                              | PADI4  | 700806    |
| Poly(A) binding protein interacting protein 1                     | PAIP1  | 700869    |
| Poly(A) binding protein interacting protein 2                     | PAIP2  | 693317    |
| P21 protein (Cdc42/Rac)-activated kinase 6                        | PAK6   | 701589    |
| Partner and localizer of BRCA2                                    | PALB2  | 700843    |
| Paralemmin 2                                                      | PALM2  | 100532752 |
| Peptidase domain containing associated with muscle regeneration 1 | PAMR1  | 717140    |
| PAN2 poly(A) specific ribonuclease subunit                        | PAN2   | 712478    |
| Pantothenate kinase 1                                             | PANK1  | 696041    |
| PAP associated domain containing 7                                | PAPD7  | 713853    |
| 3'-phosphoadenosine 5'-phosphosulfate synthase 2                  | PAPSS2 | 704688    |
| Progestin and adipoq receptor family member VIII                  | PAQR8  | 708418    |
| Par-3 family cell polarity regulator                              | PARD3  | 706472    |
| Poly(ADP-ribose) glycohydrolase                                   | PARG   | 709432    |
| Parkinson protein 7                                               | PARK7  | 708377    |
| Poly(A)-specific ribonuclease                                     | PARN   | 712984    |
| Poly(ADP-ribose) polymerase family member 10                      | PARP10 | 708132    |
| Poly(ADP-ribose) polymerase family member 11                      | PARP11 | 721828    |
| Poly(ADP-ribose) polymerase family member 15                      | PARP15 | 715533    |
| Poly(ADP-ribose) polymerase family member 16                      | PARP16 | 709140    |
| Poly(ADP-ribose) polymerase 2                                     | PARP2  | 701955    |
| Poly(ADP-ribose) polymerase family member 8                       | PARP8  | 702637    |
| Prostate and testis expressed 1                                   | PATE1  | 713491    |
| Protein associated with topoisomerase II homolog 1 (yeast)        | PATL1  | 699207    |
| PAX3 and PAX7 binding protein 1                                   | PAXBP1 | 700489    |
| Polysaccharide biosynthesis domain containing 1                   | PBDC1  | 705125    |
| Pre-B-cell leukemia homeobox 1                                    | PBX1   | 694416    |
| Pre-B-cell leukemia homeobox 4                                    | PBX4   | 106994672 |
| Poly(rc) binding protein 2                                        | PCBP2  | 703175    |
| Propionyl-coa carboxylase beta subunit                            | PCCB   | 716964    |
| Protocadherin alpha 1                                             | PCDHA1 | 698493    |
| Protocadherin alpha 7                                             | PCDHA7 | 698370    |
| Polycomb group ring finger 2                                      | PCGF2  | 694187    |
| Polycomb group ring finger 3                                      | PCGF3  | 697151    |
| Polycomb group ring finger 6                                      | PCGF6  | 714508    |
| PCI domain containing 2                                           | PCID2  | 714247    |
| Protein-L-isoaspartate (D-aspartate) O-methyltransferase          | PCMT1  | 695893    |
| Proliferating cell nuclear antigen                                | PCNA   | 718006    |
| Proprotein convertase subtilisin/kexin type 7                     | PCSK7  | 697567    |

|                                                         |          |           |
|---------------------------------------------------------|----------|-----------|
| Phosphate cytidyltransferase 1, choline, alpha          | PCYT1A   | 722105    |
| Programmed cell death 2-like                            | PDCD2L   | 705688    |
| Programmed cell death 5                                 | PDCD5    | 702277    |
| Programmed cell death 6                                 | PDCD6    | 723043    |
| Programmed cell death 7                                 | PDCD7    | 708758    |
| Phosphodiesterase 12                                    | PDE12    | 703552    |
| Phosphodiesterase 1A                                    | PDE1A    | 705555    |
| Phosphodiesterase 8A                                    | PDE8A    | 694750    |
| Phosphodiesterase 9A                                    | PDE9A    | 100301992 |
| Peptide deformylase (mitochondrial)                     | PDF      | 100427224 |
| Platelet-derived growth factor beta polypeptide         | PDGFB    | 703173    |
| Pyruvate dehydrogenase (lipoamide) alpha 1              | PDHA1    | 100423992 |
| Pyruvate dehydrogenase (lipoamide) beta                 | PDHB     | 574227    |
| PDLIM1 interacting kinase 1 like                        | PDIK1L   | 719774    |
| Pyruvate dehydrogenase kinase, isozyme 2                | PDK2     | 704169    |
| Pyruvate dehydrogenase phosphatase regulatory subunit   | PDPR     | 709861    |
| P53 and DNA damage regulated 1                          | PDRG1    | 712622    |
| PDZ domain containing 3                                 | PDZD3    | 704100    |
| PDZ domain containing 4                                 | PDZD4    | 697387    |
| Paternally expressed 3                                  | PEG3     | 707825    |
| Proline, glutamate and leucine rich protein 1           | PELP1    | 677854    |
| Peroxisomal biogenesis factor 11 beta                   | PEX11B   | 698184    |
| Peroxisomal biogenesis factor 16                        | PEX16    | 714904    |
| Prefoldin subunit 2                                     | PFDN2    | 719886    |
| Prefoldin subunit 5                                     | PFDN5    | 702355    |
| Prefoldin subunit 6                                     | PFDN6    | 718253    |
| Piggybac transposable element derived 2                 | PGBD2    | 709925    |
| Protein geranylgeranyltransferase type I, beta subunit  | PGGT1B   | 696437    |
| Phosphatidylglycerophosphate synthase 1                 | PGS1     | 710125    |
| Phosphatase and actin regulator 2                       | PHACTR2  | 700363    |
| Polyhomeotic homolog 1 (Drosophila)                     | PHC1     | 722268    |
| Polyhomeotic homolog 2 (Drosophila)                     | PHC2     | 710201    |
| PHD finger protein 1                                    | PHF1     | 718337    |
| PHD finger protein 12                                   | PHF12    | 710851    |
| PHD finger protein 14                                   | PHF14    | 694855    |
| PHD finger protein 2                                    | PHF2     | 717585    |
| PHD finger protein 23                                   | PHF23    | 714538    |
| PHD finger protein 6                                    | PHF6     | 707390    |
| PHD finger protein 7                                    | PHF7     | 697103    |
| Pleckstrin homology domain interacting protein          | PHIP     | 716810    |
| Phosphorylase kinase, alpha 2 (liver)                   | PHKA2    | 694376    |
| PH domain and leucine rich repeat protein phosphatase 1 | PHLPP1   | 705882    |
| Phosphatase, orphan 1                                   | PHOSPHO1 | 698959    |
| Phosphatase, orphan 2                                   | PHOSPHO2 | 100429656 |
| Phosphohistidine phosphatase 1                          | PHPT1    | 721674    |
| 5-phosphohydroxy-L-lysine phospho-lyase                 | PHYKPL   | 702302    |
| Phosphatidylinositol 4-kinase, catalytic, alpha         | PI4KA    | 698020    |
| Phosphatidylinositol 4-kinase, catalytic, beta          | PI4KB    | 710104    |

|                                                                       |          |           |
|-----------------------------------------------------------------------|----------|-----------|
| Phosphatidylinositol glycan anchor biosynthesis class A               | PIGA     | 712514    |
| Phosphatidylinositol glycan anchor biosynthesis class C               | PIGC     | 705657    |
| Phosphatidylinositol glycan anchor biosynthesis class G               | PIGG     | 714088    |
| Phosphatidylinositol glycan anchor biosynthesis class H               | PIGH     | 710780    |
| Phosphatidylinositol glycan anchor biosynthesis class S               | PIGS     | 709115    |
| PIH1 domain containing 1                                              | PIH1D1   | 718787    |
| Phosphatidylinositol 3-kinase catalytic subunit type 3                | PIK3C3   | 693918    |
| Phosphatidylinositol-4,5-bisphosphate 3-kinase catalytic subunit beta | PIK3CB   | 716098    |
| Phosphoinositide-3-kinase interacting protein 1                       | PIK3IP1  | 716694    |
| Phosphoinositide-3-kinase regulatory subunit 4                        | PIK3R4   | 718012    |
| Pim-2 proto-oncogene, serine/threonine kinase                         | PIM2     | 711844    |
| Phosphatidylinositol transfer protein alpha                           | PITPNA   | 721228    |
| Phosphatidylinositol transfer protein beta                            | PITPNB   | 713414    |
| Phosphatidylinositol transfer protein, membrane associated 2          | PITPNM2  | 703969    |
| Praja ring finger 1, E3 ubiquitin protein ligase                      | PJA1     | 695038    |
| Plakophilin 2                                                         | PKP2     | 100429376 |
| Phospholipase A2 group XIIB                                           | PLA2G12B | 708031    |
| Phospholipase A2 group XV                                             | PLA2G15  | 702619    |
| Phospholipase A2, group IVB (cytosolic)                               | PLA2G4B  | 100533112 |
| Phospholipase A2 group VI                                             | PLA2G6   | 700184    |
| PLAG1 like zinc finger 1                                              | PLAGL1   | 699985    |
| Phospholipase B domain containing 1                                   | PLBD1    | 698939    |
| Phospholipase B domain containing 2                                   | PLBD2    | 714669    |
| Phospholipase C beta 1                                                | PLCB1    | 718387    |
| Phospholipase C beta 2                                                | PLCB2    | 701951    |
| Phospholipase D family member 3                                       | PLD3     | 701083    |
| Pleckstrin homology domain containing A3                              | PLEKHA3  | 703417    |
| Pleckstrin homology domain containing A7                              | PLEKHA7  | 697646    |
| Pleckstrin homology and FYVE domain containing 2                      | PLEKHF2  | 701884    |
| Pleckstrin homology and rhogef domain containing G2                   | PLEKHG2  | 698408    |
| Pleckstrin homology, myth4 and FERM domain containing H3              | PLEKHH3  | 711013    |
| Pleckstrin homology domain containing O1                              | PLEKHO1  | 706145    |
| Pleckstrin homology domain containing O2                              | PLEKHO2  | 712677    |
| Plasminogen receptor, C-terminal lysine transmembrane protein         | PLGRKT   | 693286    |
| Proteolipid protein 2 (colonic epithelium-enriched)                   | PLP2     | 712869    |
| Phospholipid phosphatase 2                                            | PLPP2    | 721004    |
| Phospholipid phosphatase 6                                            | PLPP6    | 695188    |
| Plastin 3                                                             | PLS3     | 709055    |
| Phospholipid scramblase 3                                             | PLSCR3   | 721831    |
| Plexin A2                                                             | PLXNA2   | 713800    |
| Plexin B3                                                             | PLXNB3   | 696903    |
| Promyelocytic leukemia                                                | PML      | 700379    |
| Peripheral myelin protein 22                                          | PMP22    | 693527    |
| PNN-interacting serine/arginine-rich protein                          | PNISR    | 694075    |
| Polynucleotide kinase 3'-phosphatase                                  | PNKP     | 719084    |
| Pogo transposable element with KRAB domain                            | POGK     | 696834    |
| Protein O-glucosyltransferase 1                                       | POGLUT1  | 712357    |

|                                                                           |          |           |
|---------------------------------------------------------------------------|----------|-----------|
| Pogo transposable element with ZNF domain                                 | POGZ     | 710634    |
| Polymerase (DNA directed), beta                                           | POLB     | 704801    |
| Polymerase (DNA directed), gamma                                          | POLG     | 699750    |
| Polymerase (DNA directed) kappa                                           | POLK     | 705713    |
| Polymerase (RNA) II (DNA directed) polypeptide B, 140kda                  | POLR2B   | 694664    |
| Polymerase (RNA) II (DNA directed) polypeptide F                          | POLR2F   | 699566    |
| Polymerase (RNA) II (DNA directed) polypeptide G                          | POLR2G   | 718548    |
| Polymerase (RNA) II (DNA directed) polypeptide I, 14.5kda                 | POLR2I   | 712412    |
| Polymerase (RNA) III (DNA directed) polypeptide B                         | POLR3B   | 702711    |
| Polymerase (RNA) mitochondrial (DNA directed)                             | POLRMT   | 100426184 |
| Protein O-linked mannose N-acetylglucosaminyltransferase 1<br>(beta 1,2-) | POMGNT1  | 707205    |
| Proteasome maturation protein                                             | POMP     | 711980    |
| POP5 homolog, ribonuclease P/MRP subunit                                  | POP5     | 697559    |
| P450 (cytochrome) oxidoreductase                                          | POR      | 715888    |
| Protection of telomeres 1                                                 | POT1     | 696751    |
| POU class 2 homeobox 1                                                    | POU2F1   | 700530    |
| Peroxisome proliferator-activated receptor delta                          | PPARD    | 718861    |
| Peroxisome proliferator-activated receptor gamma                          | PPARG    | 574190    |
| Phosphopantothenoylcysteine decarboxylase                                 | PPCDC    | 704015    |
| Phosphopantothenoylcysteine synthetase                                    | PPCS     | 697064    |
| Peptidylprolyl isomerase E (cyclophilin E)                                | PPIE     | 716340    |
| Peptidylprolyl isomerase G (cyclophilin G)                                | PPIG     | 706262    |
| Peptidylprolyl isomerase H (cyclophilin H)                                | PPIH     | 697669    |
| Peptidylprolyl isomerase like 3                                           | PPIL3    | 700456    |
| Diphosphoinositol pentakisphosphate kinase 2                              | PPIP5K2  | 703458    |
| Protein phosphatase, Mg <sup>2+</sup> /Mn <sup>2+</sup> dependent 1A      | PPM1A    | 702987    |
| Protein phosphatase, Mg <sup>2+</sup> /Mn <sup>2+</sup> dependent 1B      | PPM1B    | 713918    |
| Protein phosphatase, Mg <sup>2+</sup> /Mn <sup>2+</sup> dependent 1F      | PPM1F    | 698441    |
| Protein phosphatase, Mg <sup>2+</sup> /Mn <sup>2+</sup> dependent 1G      | PPM1G    | 700695    |
| Protein phosphatase 1 regulatory subunit 15A                              | PPP1R15A | 718350    |
| Protein phosphatase 1 regulatory subunit 16B                              | PPP1R16B | 693349    |
| Protein phosphatase 1, regulatory subunit 17                              | PPP1R17  | 694066    |
| Protein phosphatase 1 regulatory subunit 27                               | PPP1R27  | 714648    |
| Protein phosphatase 1 regulatory subunit 35                               | PPP1R35  | 712067    |
| Protein phosphatase 2 regulatory subunit B", alpha                        | PPP2R3A  | 717078    |
| Protein phosphatase 2 regulatory subunit B", gamma                        | PPP2R3C  | 694616    |
| Protein phosphatase 2 regulatory subunit B', gamma                        | PPP2R5C  | 718894    |
| Protein phosphatase 3, catalytic subunit, gamma isozyme                   | PPP3CC   | 708233    |
| Protein phosphatase 4 catalytic subunit                                   | PPP4C    | 708510    |
| Peptidylprolyl isomerase domain and WD repeat containing 1                | PPWD1    | 696267    |
| Pancreatic polypeptide                                                    | PPY      | 713988    |
| Polyglutamine binding protein 1                                           | PQBP1    | 711678    |
| Prolylcarboxypeptidase                                                    | PRCP     | 701305    |
| PR domain containing 1, with ZNF domain                                   | PRDM1    | 696757    |
| PR domain containing 2, with ZNF domain                                   | PRDM2    | 716295    |
| PR domain containing 4                                                    | PRDM4    | 704529    |
| PR domain containing 5                                                    | PRDM5    | 708790    |

|                                                                              |           |           |
|------------------------------------------------------------------------------|-----------|-----------|
| Peroxiredoxin 2                                                              | PRDX2     | 716665    |
| Peroxiredoxin 3                                                              | PRDX3     | 702882    |
| Peroxiredoxin 4                                                              | PRDX4     | 697635    |
| PRELI domain containing 1                                                    | PRELID1   | 699254    |
| Prolyl endopeptidase-like                                                    | PREPL     | 713980    |
| Proteoglycan 3                                                               | PRG3      | 706381    |
| Proline rich membrane anchor 1                                               | PRIMA1    | 100426272 |
| Protein kinase, AMP-activated, alpha 2 catalytic subunit                     | PRKAA2    | 717703    |
| Protein kinase, AMP-activated, beta 1 non-catalytic subunit                  | PRKAB1    | 695737    |
| Protein kinase, camp-dependent, beta catalytic subunit                       | PRKACB    | 709728    |
| Protein kinase C, beta                                                       | PRKCB     | 701195    |
| Protein kinase C, gamma                                                      | PRKCG     | 720263    |
| Protein kinase, interferon-inducible double stranded RNA dependent activator | PRKRA     | 703063    |
| Protamine 1                                                                  | PRM1      | 716327    |
| Protein arginine methyltransferase 5                                         | PRMT5     | 712718    |
| Leucine zipper putative tumor suppressor 3                                   | PROSAPIP1 | 717136    |
| Pre-mrna processing factor 31                                                | PRPF31    | 720567    |
| Pre-mrna processing factor 40 homolog A                                      | PRPF40A   | 696668    |
| Phosphoribosyl pyrophosphate synthetase-associated protein 1                 | PRPSAP1   | 706625    |
| Proline rich 13                                                              | PRR13     | 702930    |
| Proline rich 3                                                               | PRR3      | 711699    |
| Proline-rich coiled-coil 1                                                   | PRRC1     | 704248    |
| Proline-rich coiled-coil 2A                                                  | PRRC2A    | 715715    |
| Phosphoribosyl transferase domain containing 1                               | PRTFDC1   | 712819    |
| Pleckstrin and Sec7 domain containing 4                                      | PSD4      | 701785    |
| Presenilin enhancer gamma secretase subunit                                  | PSENN     | 100429008 |
| Proteasome subunit alpha 1                                                   | PSMA1     | 701029    |
| Proteasome subunit alpha 2                                                   | PSMA2     | 701683    |
| Proteasome subunit alpha 3                                                   | PSMA3     | 700251    |
| Proteasome subunit alpha 4                                                   | PSMA4     | 710417    |
| Proteasome subunit alpha 5                                                   | PSMA5     | 698435    |
| Proteasome subunit beta 2                                                    | PSMB2     | 712193    |
| Proteasome subunit beta 4                                                    | PSMB4     | 710734    |
| Proteasome subunit beta 7                                                    | PSMB7     | 694567    |
| Proteasome subunit beta 8                                                    | PSMB8     | 717766    |
| Proteasome subunit beta 9                                                    | PSMB9     | 716980    |
| Proteasome 26S subunit, ATPase 4                                             | PSMC4     | 699847    |
| Proteasome 26S subunit, non-ATPase 1                                         | PSMD1     | 711724    |
| Proteasome 26S subunit, non-ATPase 12                                        | PSMD12    | 718756    |
| Proteasome 26S subunit, non-ATPase 6                                         | PSMD6     | 698601    |
| Proteasome 26S subunit, non-ATPase 7                                         | PSMD7     | 705581    |
| Proteasome activator subunit 2                                               | PSME2     | 715288    |
| Proteasome (prosome, macropain) assembly chaperone 1                         | PSMG1     | 715758    |
| Proteasome (prosome, macropain) assembly chaperone 2                         | PSMG2     | 717110    |
| Psoriasis susceptibility 1 candidate 2                                       | PSORS1C2  | 714607    |
| Paraspeckle component 1                                                      | PSPC1     | 705080    |
| Polypyrimidine tract binding protein 2                                       | PTBP2     | 710101    |

|                                                                   |           |        |
|-------------------------------------------------------------------|-----------|--------|
| Prostaglandin D2 receptor (DP)                                    | PTGDR     | 707918 |
| Protein tyrosine kinase 2 beta                                    | PTK2B     | 712787 |
| Pleiotrophin                                                      | PTN       | 709496 |
| Protein tyrosine phosphatase type IVA, member 2                   | PTP4A2    | 706489 |
| Protein tyrosine phosphatase domain containing 1                  | PTPDC1    | 707878 |
| Protein tyrosine phosphatase, non-receptor type 1                 | PTPN1     | 702016 |
| Protein tyrosine phosphatase, non-receptor type 12                | PTPN12    | 721538 |
| Protein tyrosine phosphatase, non-receptor type 23                | PTPN23    | 711601 |
| Protein tyrosine phosphatase, non-receptor type 4 (megakaryocyte) | PTPN4     | 695516 |
| Protein tyrosine phosphatase, receptor type, D                    | PTPRD     | 714954 |
| Protein tyrosine phosphatase, receptor type, G                    | PTPRG     | 703937 |
| Pumilio RNA binding family member 1                               | PUM1      | 704848 |
| Pumilio RNA binding family member 2                               | PUM2      | 701782 |
| Poliovirus receptor-related 2 (herpesvirus entry mediator B)      | PVRL2     | 713229 |
| PWP2 periodic tryptophan protein homolog (yeast)                  | PWP2      | 722216 |
| Peroxisomal membrane protein 2                                    | PXMP2     | 693648 |
| 2-phosphoxylose phosphatase 1                                     | PXYLP1    | 715229 |
| Phosphorylase, glycogen, liver                                    | PYGL      | 706853 |
| PYM homolog 1, exon junction complex associated factor            | PYM1      | 708148 |
| Glutaminyl-trna synthetase                                        | QARS      | 708111 |
| Quiescin sulfhydryl oxidase 1                                     | QSOX1     | 718589 |
| RAB11 family interacting protein 4 (class II)                     | RAB11FIP4 | 717629 |
| RAB18, member RAS oncogene family                                 | RAB18     | 708843 |
| RAB23, member RAS oncogene family                                 | RAB23     | 712860 |
| RAB30, member RAS oncogene family                                 | RAB30     | 701550 |
| RAB32, member RAS oncogene family                                 | RAB32     | 702431 |
| RAB33B, member RAS oncogene family                                | RAB33B    | 697603 |
| RAB3C, member RAS oncogene family                                 | RAB3C     | 709039 |
| RAB3 gtpase activating non-catalytic protein subunit 2            | RAB3GAP2  | 706252 |
| RAB3A interacting protein                                         | RAB3IP    | 717215 |
| RAB5B, member RAS oncogene family                                 | RAB5B     | 708347 |
| RAB6A, member RAS oncogene family                                 | RAB6A     | 718717 |
| Rab geranylgeranyltransferase, beta subunit                       | RABGGTB   | 705421 |
| RAB, member of RAS oncogene family-like 2B                        | RABL2B    | 716615 |
| RAD17 checkpoint clamp loader component                           | RAD17     | 700116 |
| RAD51 paralog C                                                   | RAD51C    | 714828 |
| RAD9 checkpoint clamp component A                                 | RAD9A     | 712345 |
| Raf-1 proto-oncogene, serine/threonine kinase                     | RAF1      | 694725 |
| V-ral simian leukemia viral oncogene homolog A (ras related)      | RALA      | 703440 |
| V-ral simian leukemia viral oncogene homolog B                    | RALB      | 695852 |
| Ral gtpase activating protein, alpha subunit 1 (catalytic)        | RALGAPA1  | 695674 |
| Ral gtpase activating protein, beta subunit (non-catalytic)       | RALGAPB   | 705742 |
| Ral GEF with PH domain and SH3 binding motif 1                    | RALGPS1   | 708253 |
| RALY heterogeneous nuclear ribonucleoprotein                      | RALY      | 713317 |
| RAN binding protein 10                                            | RANBP10   | 700911 |
| RAN binding protein 6                                             | RANBP6    | 715799 |
| Ran gtpase activating protein 1                                   | RANGAP1   | 710698 |
| RAN guanine nucleotide release factor                             | RANGRF    | 717206 |



|                                                                 |         |        |
|-----------------------------------------------------------------|---------|--------|
| RAP2A, member of RAS oncogene family                            | RAP2A   | 697215 |
| Rap guanine nucleotide exchange factor 2                        | RAPGEF2 | 704717 |
| Arginyl-trna synthetase                                         | RARS    | 698998 |
| Arginyl-trna synthetase 2, mitochondrial                        | RARS2   | 699240 |
| RAS p21 protein activator (gtpase activating protein) 1         | RASA1   | 694085 |
| RAS, dexamethasone-induced 1                                    | RASD1   | 698839 |
| RAS and EF-hand domain containing                               | RASEF   | 708296 |
| RAS-like family 10 member A                                     | RASL10A | 714587 |
| Ribonucleoprotein, PTB-binding 1                                | RAVER1  | 715250 |
| RB1 inducible coiled-coil 1                                     | RB1CC1  | 710330 |
| Retinoblastoma binding protein 4                                | RBBP4   | 708710 |
| Retinoblastoma binding protein 8                                | RBBP8   | 677718 |
| Ranbp-type and C3HC4-type zinc finger containing 1              | RBCK1   | 714692 |
| RNA binding motif protein 12B                                   | RBM12B  | 698382 |
| RNA binding motif protein 15                                    | RBM15   | 701414 |
| RNA binding motif protein 17                                    | RBM17   | 712996 |
| RNA binding motif protein 22                                    | RBM22   | 712713 |
| RNA binding motif protein 39                                    | RBM39   | 704198 |
| RNA binding motif protein 42                                    | RBM42   | 709852 |
| RNA binding motif protein 45                                    | RBM45   | 702714 |
| RNA binding motif protein 5                                     | RBM5    | 704114 |
| RNA binding motif, single stranded interacting protein 1        | RBMS1   | 703608 |
| RNA binding motif, single stranded interacting protein 2        | RBMS2   | 713163 |
| RNA binding motif protein, X-linked 2                           | RBMX2   | 703472 |
| REST corepressor 3                                              | RCOR3   | 712037 |
| Retinol dehydrogenase 5 (11-cis/9-cis)                          | RDH5    | 709644 |
| Reversion-inducing-cysteine-rich protein with kazal motifs      | RECK    | 694043 |
| Recq helicase-like                                              | RECQL   | 705871 |
| Arginine-glutamic acid dipeptide (RE) repeats                   | RERE    | 708902 |
| REX1, RNA exonuclease 1 homolog                                 | REXO1   | 708931 |
| RNA exonuclease 2                                               | REXO2   | 695292 |
| RFT1 homolog                                                    | RFT1    | 694586 |
| Raftlin, lipid raft linker 1                                    | RFTN1   | 695142 |
| Raftlin family member 2                                         | RFTN2   | 697562 |
| Ring finger and WD repeat domain 2, E3 ubiquitin protein ligase | RFWD2   | 708802 |
| Regulatory factor X associated ankyrin containing protein       | RFXANK  | 719706 |
| Regucalcin                                                      | RGN     | 705733 |
| Retinal G protein coupled receptor                              | RGR     | 698258 |
| Regulator of G-protein signaling 10                             | RGS10   | 703125 |
| Regulator of G-protein signaling 11                             | RGS11   | 694588 |
| Regulator of G-protein signaling like 1                         | RGSL1   | 715693 |
| Rhomboid 5 homolog 2 (Drosophila)                               | RHBDF2  | 707033 |
| Rh family, C glycoprotein                                       | RHCG    | 664731 |
| RAD9-HUS1-RAD1 interacting nuclear orphan 1                     | RHNO1   | 709008 |
| Rho-related BTB domain containing 1                             | RHOBTB1 | 699132 |
| Ras homolog family member C                                     | RHOC    | 706034 |
| Ras homolog family member D                                     | RHOD    | 712969 |
| Ras homolog family member J                                     | RHOJ    | 705603 |

|                                                          |          |        |
|----------------------------------------------------------|----------|--------|
| Ras homolog family member V                              | RHOV     | 704675 |
| RPTOR independent companion of MTOR, complex 2           | RICTOR   | 694915 |
| Replication timing regulatory factor 1                   | RIF1     | 694817 |
| Ribosomal modification protein rimk-like family member A | RIMKLA   | 699767 |
| Regulating synaptic membrane exocytosis 4                | RIMS4    | 712194 |
| Ras and Rab interactor 1                                 | RIN1     | 714321 |
| RAD50 interactor 1                                       | RINT1    | 698414 |
| RIO kinase 2                                             | RIOK2    | 700738 |
| Receptor interacting serine/threonine kinase 4           | RIPK4    | 715077 |
| Ras-like without CAAX 1                                  | RIT1     | 717985 |
| RBPJ interacting and tubulin associated 1                | RITA1    | 712837 |
| Retinaldehyde binding protein 1                          | RLBP1    | 699510 |
| Rearranged L-myc fusion                                  | RLF      | 693503 |
| Regulator of microtubule dynamics 1                      | RMDN1    | 694237 |
| Ribonuclease, rnase A family, k6                         | RNASE6   | 704579 |
| Ribonuclease H2 subunit B                                | RNASEH2B | 707995 |
| Ribonuclease T2                                          | RNASET2  | 706533 |
| Rho family gtpase 3                                      | RND3     | 694168 |
| Ring finger protein 112                                  | RNF112   | 703312 |
| Ring finger protein 14                                   | RNF14    | 705363 |
| Ring finger protein 146                                  | RNF146   | 712152 |
| Ring finger protein 152                                  | RNF152   | 699091 |
| Ring finger protein 185                                  | RNF185   | 718351 |
| Ring finger protein 186                                  | RNF186   | 703962 |
| Ring finger protein 20                                   | RNF20    | 713614 |
| Ring finger protein 208                                  | RNF208   | 705563 |
| Ring finger protein 217                                  | RNF217   | 716647 |
| Ring finger protein 219                                  | RNF219   | 697577 |
| Ring finger protein 34, E3 ubiquitin protein ligase      | RNF34    | 700062 |
| Ring finger protein 38                                   | RNF38    | 693346 |
| Ribonuclease/angiogenin inhibitor 1                      | RNH1     | 720791 |
| RAR-related orphan receptor C                            | RORC     | 717052 |
| Replication protein A3                                   | RPA3     | 696248 |
| RNA polymerase II associated protein 3                   | RPAP3    | 703749 |
| Ribosome production factor 1 homolog                     | RPF1     | 710286 |
| RPGRIP1-like                                             | RPGRIP1L | 697345 |
| Ribosomal protein l10a                                   | RPL10A   | 718783 |
| Ribosomal protein L17                                    | RPL17    | 698967 |
| Ribosomal protein L22                                    | RPL22    | 703050 |
| Ribosomal protein L23                                    | RPL23    | 694719 |
| Ribosomal protein l23a                                   | RPL23A   | 710490 |
| Ribosomal protein L24                                    | RPL24    | 702381 |
| Ribosomal protein L26 like 1                             | RPL26L1  | 703230 |
| Ribosomal protein L27                                    | RPL27    | 712352 |
| Ribosomal protein L29                                    | RPL29    | 698602 |
| Ribosomal protein L4                                     | RPL4     | 710590 |
| Ribosomal protein l7a                                    | RPL7A    | 722215 |
| Ribosomal protein L8                                     | RPL8     | 708535 |

|                                                                                       |         |           |
|---------------------------------------------------------------------------------------|---------|-----------|
| Ribosomal protein, large, P0                                                          | RPLP0   | 574363    |
| Ribosomal protein, large, P1                                                          | RPLP1   | 695442    |
| Ribosomal protein, large, P2                                                          | RPLP2   | 700698    |
| Ribophorin I                                                                          | RPN1    | 705437    |
| Ribophorin II                                                                         | RPN2    | 708971    |
| Ribonuclease P/MRP 14kda subunit                                                      | RPP14   | 706788    |
| Ribonuclease P/MRP 21kda subunit                                                      | RPP21   | 713056    |
| Ribonuclease P/MRP 30kda subunit                                                      | RPP30   | 696537    |
| Ribonuclease P/MRP 40kda subunit                                                      | RPP40   | 710505    |
| Regulation of nuclear pre-mrna domain containing 1A                                   | RPRD1A  | 709217    |
| Ribosomal protein S10                                                                 | RPS10   | 718606    |
| Ribosomal protein S13                                                                 | RPS13   | 697513    |
| Ribosomal protein S14                                                                 | RPS14   | 710901    |
| Ribosomal protein S15                                                                 | RPS15   | 707241    |
| Ribosomal protein S16                                                                 | RPS16   | 697219    |
| Ribosomal protein S17-like                                                            | RPS17L  | 100425104 |
| Ribosomal protein S2                                                                  | RPS2    | 693615    |
| Ribosomal protein S27                                                                 | RPS27   | 106992520 |
| Ribosomal protein s27a                                                                | RPS27A  | 718909    |
| Ribosomal protein S27 like                                                            | RPS27L  | 705483    |
| Ribosomal protein S28                                                                 | RPS28   | 707133    |
| Ribosomal protein S4, X-linked                                                        | RPS4X   | 699397    |
| Ribosomal protein S5                                                                  | RPS5    | 711259    |
| Ribosomal protein S6 kinase, 90kda, polypeptide 4                                     | RPS6KA4 | 717574    |
| Ribosomal protein S7                                                                  | RPS7    | 721900    |
| Ribosomal protein S8                                                                  | RPS8    | 703957    |
| Ribosomal protein S9                                                                  | RPS9    | 694053    |
| RNA pseudouridylate synthase domain containing 3                                      | RPUSD3  | 700349    |
| Ras-related GTP binding C                                                             | RRAGC   | 715549    |
| RRN3 homolog, RNA polymerase I transcription factor                                   | RRN3    | 713500    |
| Ribosomal RNA adenine dimethylase domain containing 1                                 | RRNAD1  | 718599    |
| Ribosomal RNA processing 8, methyltransferase, homolog (yeast)                        | RRP8    | 712011    |
| Ribosomal RNA processing 9, small subunit (SSU) processome component, homolog (yeast) | RRP9    | 699421    |
| Arginine/serine-rich protein 1                                                        | RSRP1   | 712757    |
| Retbindin                                                                             | RTBDN   | 716766    |
| RNA 2',3'-cyclic phosphate and 5'-OH ligase                                           | RTCB    | 717258    |
| Rhotekin                                                                              | RTKN    | 708722    |
| Reticulon 4                                                                           | RTN4    | 619181    |
| Rotatin                                                                               | RTTN    | 703989    |
| Ruvb-like AAA ATPase 2                                                                | RUVBL2  | 100428792 |
| RWD domain containing 3                                                               | RWDD3   | 709817    |
| Relaxin/insulin-like family peptide receptor 3                                        | RXFP3   | 698115    |
| S100 calcium binding protein P                                                        | S100P   | 710510    |
| Sphingosine-1-phosphate receptor 2                                                    | S1PR2   | 712143    |
| Serum amyloid A like 1                                                                | SAAL1   | 695747    |
| SAC1 suppressor of actin mutations 1-like (yeast)                                     | SACM1L  | 714107    |
| Sterile alpha motif domain containing 13                                              | SAMD13  | 713946    |

|                                                                       |           |           |
|-----------------------------------------------------------------------|-----------|-----------|
| Sterile alpha motif domain containing 4A                              | SAMD4A    | 695336    |
| Sin3A associated protein 18kda                                        | SAP18     | 703078    |
| Sin3A associated protein 25kda                                        | SAP25     | 106997576 |
| Sin3A associated protein 30kda                                        | SAP30     | 696519    |
| SAP30 binding protein                                                 | SAP30BP   | 703077    |
| Secretion associated, Ras related gtpase 1A                           | SAR1A     | 711277    |
| Squamous cell carcinoma antigen recognized by T-cells 3               | SART3     | 705552    |
| SAM and SH3 domain containing 3                                       | SASH3     | 702089    |
| Spermidine/spermine N1-acetyltransferase 1                            | SAT1      | 697884    |
| Strawberry notch homolog 2 (Drosophila)                               | SBNO2     | 721186    |
| Sterol-C5-desaturase                                                  | SC5D      | 706827    |
| SR-related CTD-associated factor 11                                   | SCAF11    | 701894    |
| Secretory carrier membrane protein 2                                  | SCAMP2    | 709720    |
| Schwannomin interacting protein 1                                     | SCHIP1    | 703321    |
| Sex comb on midleg-like 1 (Drosophila)                                | SCML1     | 714239    |
| Sodium channel modifier 1                                             | SCNM1     | 709922    |
| Sodium channel, non voltage gated 1 beta subunit                      | SCNN1B    | 700093    |
| Serine carboxypeptidase 1                                             | SCPEP1    | 708197    |
| Secernin 3                                                            | SCRN3     | 698199    |
| Signal peptide, CUB domain, EGF-like 2                                | SCUBE2    | 708152    |
| SCY1-like, kinase-like 2                                              | SCYL2     | 695284    |
| SCY1-like, kinase-like 3                                              | SCYL3     | 701768    |
| Syndecan 1                                                            | SDC1      | 701544    |
| Syndecan binding protein                                              | SDCBP     | 698381    |
| Stromal cell-derived factor 2                                         | SDF2      | 716189    |
| Succinate dehydrogenase complex subunit A, flavoprotein (Fp)          | SDHA      | 708018    |
| Succinate dehydrogenase complex assembly factor 2                     | SDHAF2    | 693401    |
| Succinate dehydrogenase complex subunit B, iron sulfur (Ip)           | SDHB      | 699810    |
| Succinate dehydrogenase complex, subunit D, integral membrane protein | SDHD      | 711326    |
| SEC22 homolog A, vesicle trafficking protein                          | SEC22A    | 715277    |
| SEC22 homolog C, vesicle trafficking protein                          | SEC22C    | 716351    |
| Sec23 homolog A, COPII coat complex component                         | SEC23A    | 698500    |
| Sec23 homolog B, COPII coat complex component                         | SEC23B    | 698440    |
| SEC24 homolog C, COPII coat complex component                         | SEC24C    | 714688    |
| SEC24 homolog D, COPII coat complex component                         | SEC24D    | 707521    |
| SEC31 homolog A, COPII coat complex component                         | SEC31A    | 693687    |
| Sec61 translocon alpha 1 subunit                                      | SEC61A1   | 709787    |
| Sec61 translocon alpha 2 subunit                                      | SEC61A2   | 100427728 |
| Sec61 translocon beta subunit                                         | SEC61B    | 717815    |
| Sec61 translocon gamma subunit                                        | SEC61G    | 716898    |
| SEC62 homolog, preprotein translocation factor                        | SEC62     | 696989    |
| SECIS binding protein 2                                               | SECISBP2  | 697442    |
| SECIS binding protein 2-like                                          | SECISBP2L | 714764    |
| Selenoprotein K                                                       | SELK      | 693421    |
| Selenoprotein M                                                       | SELM      | 718290    |
| Semenogelin I pseudogene                                              | SEMG1P    | 100424776 |
| SUMO1/sentrin specific peptidase 5                                    | SEN5      | 710223    |

|                                                                                     |          |        |
|-------------------------------------------------------------------------------------|----------|--------|
| SUMO1/sentrin specific peptidase 7                                                  | SENP7    | 701453 |
| Selenoprotein W, 1                                                                  | SEPW1    | 718370 |
| SERPINE1 mrna binding protein 1                                                     | SERBP1   | 700797 |
| Serine incorporator 1                                                               | SERINC1  | 713999 |
| Serpin peptidase inhibitor, clade A (alpha-1 antiproteinase, antitrypsin), member 6 | SERPINA6 | 701121 |
| Serpin peptidase inhibitor, clade B (ovalbumin), member 7                           | SERPINB7 | 701671 |
| Serpin peptidase inhibitor, clade G (C1 inhibitor), member 1                        | SERPING1 | 703928 |
| Serpin peptidase inhibitor, clade I (neuroserpin), member 1                         | SERPINI1 | 699483 |
| Sestrin 1                                                                           | SESN1    | 700232 |
| Sestrin 2                                                                           | SESN2    | 716904 |
| Sestrin 3                                                                           | SESN3    | 699329 |
| SET domain containing 2                                                             | SETD2    | 711825 |
| SET domain containing 5                                                             | SETD5    | 704174 |
| SET domain, bifurcated 1                                                            | SETDB1   | 716141 |
| Splicing factor 3b, subunit 1, 155kda                                               | SF3B1    | 697773 |
| Splicing factor 3b subunit 3                                                        | SF3B3    | 708939 |
| Splicing factor 3b, subunit 4, 49kda                                                | SF3B4    | 705655 |
| Splicing factor 3b subunit 6                                                        | SF3B6    | 704090 |
| SFI1 centrin binding protein                                                        | SFI1     | 716833 |
| Scm-like with four mbt domains 1                                                    | SFMBT1   | 694961 |
| Stratifin                                                                           | SFN      | 715055 |
| Secreted frizzled-related protein 1                                                 | SFRP1    | 702876 |
| SFT2 domain containing 3                                                            | SFT2D3   | 699830 |
| Surfactant associated 2                                                             | SFTA2    | 714397 |
| Surfactant protein D                                                                | SFTPD    | 678657 |
| Sideroflexin 4                                                                      | SFXN4    | 702765 |
| Sarcoglycan epsilon                                                                 | SGCE     | 700104 |
| Serum/glucocorticoid regulated kinase 1                                             | SGK1     | 713082 |
| Shugoshin-like 1 (S. Pombe)                                                         | SGOL1    | 698231 |
| SH2B adaptor protein 2                                                              | SH2B2    | 714861 |
| SH2 domain containing 1B                                                            | SH2D1B   | 720097 |
| SH2 domain containing 3C                                                            | SH2D3C   | 699706 |
| SH3 domain binding glutamate-rich protein                                           | SH3BGR   | 722581 |
| SH3-domain binding protein 4                                                        | SH3BP4   | 693393 |
| SH3 domain containing 19                                                            | SH3D19   | 694606 |
| SH3-domain GRB2-like endophilin B1                                                  | SH3GLB1  | 712393 |
| SH3 domain containing ring finger 1                                                 | SH3RF1   | 694082 |
| SH3 domain and tetratricopeptide repeats 2                                          | SH3TC2   | 709970 |
| SHANK associated RH domain interactor                                               | SHARPIN  | 713534 |
| SHC (Src homology 2 domain containing) transforming protein 1                       | SHC1     | 718982 |
| SHC (Src homology 2 domain containing) transforming protein 3                       | SHC3     | 574275 |
| Split hand/foot malformation (ectrodactyly) type 1                                  | SHFM1    | 698349 |
| Sonic hedgehog                                                                      | SHH      | 716553 |
| SHOC2 leucine-rich repeat scaffold protein                                          | SHOC2    | 695572 |
| Sedoheptulokinase                                                                   | SHPK     | 721465 |
| Shroom family member 3                                                              | SHROOM3  | 699613 |
| Siah E3 ubiquitin protein ligase 1                                                  | SIAH1    | 716629 |

|                                                                                              |          |        |
|----------------------------------------------------------------------------------------------|----------|--------|
| Sialic acid binding Ig-like lectin 1, sialoadhesin                                           | SIGLEC1  | 717470 |
| Sialic acid binding Ig-like lectin 10                                                        | SIGLEC10 | 719648 |
| Sirtuin 4                                                                                    | SIRT4    | 720498 |
| Sirtuin 7                                                                                    | SIRT7    | 715069 |
| Signaling threshold regulating transmembrane adaptor 1                                       | SIT1     | 697087 |
| SIVA1, apoptosis-inducing factor                                                             | SIVA1    | 706688 |
| SIX homeobox 5                                                                               | SIX5     | 715373 |
| SKI-like proto-oncogene                                                                      | SKIL     | 696680 |
| Superkiller viralicidic activity 2-like 2 (S. Cerevisiae)                                    | SKIV2L2  | 706419 |
| Solute carrier family 12 (sodium/potassium/chloride transporter), member 2                   | SLC12A2  | 704672 |
| Solute carrier family 16 (aromatic amino acid transporter), member 10                        | SLC16A10 | 696132 |
| Solute carrier family 18 (vesicular monoamine transporter), member 2                         | SLC18A2  | 701133 |
| Solute carrier family 18, subfamily B, member 1                                              | SLC18B1  | 708518 |
| Solute carrier family 1 (glial high affinity glutamate transporter), member 3                | SLC1A3   | 701109 |
| Solute carrier family 20 (phosphate transporter), member 1                                   | SLC20A1  | 699462 |
| Solute carrier family 22 member 14                                                           | SLC22A14 | 696120 |
| Solute carrier family 22 member 15                                                           | SLC22A15 | 710102 |
| Solute carrier family 22 member 17                                                           | SLC22A17 | 713765 |
| Solute carrier family 22 (organic anion transporter), member 6                               | SLC22A6  | 718377 |
| Solute carrier family 24 (sodium/potassium/calcium exchanger), member 2                      | SLC24A2  | 711896 |
| Solute carrier family 25 (mitochondrial carrier; citrate transporter), member 1              | SLC25A1  | 719075 |
| Solute carrier family 25 (mitochondrial carrier; oxoglutarate carrier), member 11            | SLC25A11 | 710569 |
| Solute carrier family 25 (aspartate/glutamate carrier), member 12                            | SLC25A12 | 695173 |
| Solute carrier family 25 (mitochondrial carrier, brain), member 14                           | SLC25A14 | 703255 |
| Solute carrier family 25 (carnitine/acylcarnitine translocase), member 20                    | SLC25A20 | 709029 |
| Solute carrier family 25 (mitochondrial carrier; phosphate carrier), member 24               | SLC25A24 | 694803 |
| Solute carrier family 25 (mitochondrial carrier; phosphate carrier), member 25               | SLC25A25 | 698216 |
| Solute carrier family 25 (S-adenosylmethionine carrier), member 26                           | SLC25A26 | 697960 |
| Solute carrier family 25 (mitochondrial carrier; adenine nucleotide translocator), member 31 | SLC25A31 | 710042 |
| Solute carrier family 25 (pyrimidine nucleotide carrier), member 33                          | SLC25A33 | 722285 |
| Solute carrier family 25 (mitochondrial iron transporter), member 37                         | SLC25A37 | 710518 |
| Solute carrier family 25 member 40                                                           | SLC25A40 | 705584 |
| Solute carrier family 25 member 46                                                           | SLC25A46 | 705968 |
| Solute carrier family 25 (mitochondrial carrier; adenine                                     |          |        |

|                                                                                          |          |        |
|------------------------------------------------------------------------------------------|----------|--------|
| nucleotide translocator), member 5                                                       | SLC25A5  | 693502 |
| Solute carrier family 26 (anion exchanger), member 8                                     | SLC26A8  | 719049 |
| Solute carrier family 26 (anion exchanger), member 9                                     | SLC26A9  | 696461 |
| Solute carrier family 28 (concentrative nucleoside transporter), member 3                | SLC28A3  | 709560 |
| Solute carrier family 29 (equilibrative nucleoside transporter), member 1                | SLC29A1  | 703031 |
| Solute carrier family 2 (facilitated glucose transporter), member 13                     | SLC2A13  | 697822 |
| Solute carrier family 30 (zinc transporter), member 5                                    | SLC30A5  | 699371 |
| Solute carrier family 34 (type II sodium/phosphate cotransporter), member 2              | SLC34A2  | 694217 |
| Solute carrier family 35 (UDP-galactose transporter), member A2                          | SLC35A2  | 711587 |
| Solute carrier family 35 member B1                                                       | SLC35B1  | 699953 |
| Solute carrier family 35 (adenosine 3'-phospho 5'-phosphosulfate transporter), member B3 | SLC35B3  | 698416 |
| Solute carrier family 35 (UDP-glca/UDP-galnac transporter), member D1                    | SLC35D1  | 700175 |
| Solute carrier family 37 (glucose-6-phosphate transporter), member 2                     | SLC37A2  | 712841 |
| Solute carrier family 38 member 1                                                        | SLC38A1  | 702135 |
| Solute carrier family 38 member 6                                                        | SLC38A6  | 704017 |
| Solute carrier family 38 member 7                                                        | SLC38A7  | 707671 |
| Solute carrier family 39 (zinc transporter), member 13                                   | SLC39A13 | 713420 |
| Solute carrier family 39 (zinc transporter), member 3                                    | SLC39A3  | 711564 |
| Solute carrier family 39 (zinc transporter), member 8                                    | SLC39A8  | 710142 |
| Solute carrier family 41 (magnesium transporter), member 1                               | SLC41A1  | 696944 |
| Solute carrier family 41 member 3                                                        | SLC41A3  | 716921 |
| Solute carrier family 44 member 3                                                        | SLC44A3  | 714768 |
| Solute carrier family 44 member 4                                                        | SLC44A4  | 715779 |
| Solute carrier family 4, sodium borate transporter, member 11                            | SLC4A11  | 718393 |
| Solute carrier family 4 (anion exchanger), member 1, adaptor protein                     | SLC4A1AP | 701783 |
| Solute carrier family 4 (anion exchanger), member 2                                      | SLC4A2   | 713966 |
| Solute carrier family 4, sodium bicarbonate cotransporter, member 7                      | SLC4A7   | 701925 |
| Solute carrier family 5 (sodium/myo-inositol cotransporter), member 3                    | SLC5A3   | 698346 |
| Solute carrier family 5 (sodium/multivitamin and iodide cotransporter), member 6         | SLC5A6   | 699074 |
| Solute carrier family 6 (neurotransmitter transporter), member 11                        | SLC6A11  | 696741 |
| Solute carrier family 6 member 16                                                        | SLC6A16  | 718690 |
| Solute carrier family 6 (neurotransmitter transporter), member 2                         | SLC6A2   | 613238 |
| Solute carrier family 7 (anionic amino acid transporter), member 13                      | SLC7A13  | 693964 |
| Solute carrier family 7 (cationic amino acid transporter, y+ system), member 3           | SLC7A3   | 696288 |
| Solute carrier family 7 (amino acid transporter light chain, L system), member 8         | SLC7A8   | 713511 |

|                                                                                                   |          |        |
|---------------------------------------------------------------------------------------------------|----------|--------|
| Solute carrier family 9, subfamily A (NHE9, cation proton antiporter 9), member 9                 | SLC9A9   | 713935 |
| Solute carrier organic anion transporter family member 1B1                                        | SLCO1B1  | 705308 |
| Solute carrier organic anion transporter family member 2B1                                        | SLCO2B1  | 694829 |
| Schlafen like 1                                                                                   | SLFNL1   | 695605 |
| SLIT and NTRK like family member 1                                                                | SLITRK1  | 699217 |
| STE20 like kinase                                                                                 | SLK      | 715086 |
| Sarcolemma associated protein                                                                     | SLMAP    | 703086 |
| Secretory leukocyte peptidase inhibitor                                                           | SLPI     | 711156 |
| SLU7 homolog, splicing factor                                                                     | SLU7     | 696023 |
| SLX4 interacting protein                                                                          | SLX4IP   | 718563 |
| SMAD family member 1                                                                              | SMAD1    | 574340 |
| SMAD family member 2                                                                              | SMAD2    | 697581 |
| Small arfgap2                                                                                     | SMAP2    | 694502 |
| SWI/SNF related, matrix associated, actin dependent regulator of chromatin, subfamily a, member 2 | SMARCA2  | 696973 |
| SWI/SNF related, matrix associated, actin dependent regulator of chromatin, subfamily a, member 5 | SMARCA5  | 700614 |
| SWI/SNF related, matrix associated, actin dependent regulator of chromatin, subfamily a-like 1    | SMARCAL1 | 695741 |
| SWI/SNF related, matrix associated, actin dependent regulator of chromatin, subfamily b, member 1 | SMARCB1  | 699190 |
| SWI/SNF related, matrix associated, actin dependent regulator of chromatin, subfamily e, member 1 | SMARCE1  | 701310 |
| Structural maintenance of chromosomes 4                                                           | SMC4     | 702615 |
| SMG7 nonsense mediated mrna decay factor                                                          | SMG7     | 717603 |
| SMG8 nonsense mediated mrna decay factor                                                          | SMG8     | 711172 |
| Small integral membrane protein 13                                                                | SMIM13   | 703387 |
| Survival of motor neuron 1, telomeric                                                             | SMN1     | 677703 |
| Survival motor neuron domain containing 1                                                         | SMNDC1   | 694761 |
| Sphingomyelin phosphodiesterase 2                                                                 | SMPD2    | 698865 |
| Smu-1 suppressor of mec-8 and unc-52 homolog (C. Elegans)                                         | SMU1     | 703656 |
| SET and MYND domain containing 2                                                                  | SMYD2    | 709375 |
| SMYD family member 5                                                                              | SMYD5    | 705926 |
| Synaptosome associated protein 25kda                                                              | SNAP25   | 574204 |
| Synaptosome associated protein 29kda                                                              | SNAP29   | 696708 |
| SNAP-associated protein                                                                           | SNAPIN   | 715546 |
| Staphylococcal nuclease and tudor domain containing 1                                             | SND1     | 699542 |
| Smad nuclear interacting protein 1                                                                | SNIP1    | 713733 |
| SNF related kinase                                                                                | SNRK     | 715803 |
| Small nuclear ribonucleoprotein polypeptide A                                                     | SNRPA    | 702730 |
| Small nuclear ribonucleoprotein polypeptides B and B1                                             | SNRPB    | 716578 |
| Small nuclear ribonucleoprotein D2 polypeptide                                                    | SNRPD2   | 715183 |
| Small nuclear ribonucleoprotein polypeptide G                                                     | SNRPG    | 702586 |
| SNRPN upstream reading frame                                                                      | SNURF    | 711028 |
| Sorting nexin 1                                                                                   | SNX1     | 706544 |
| Sorting nexin 13                                                                                  | SNX13    | 714019 |
| Sorting nexin 14                                                                                  | SNX14    | 696632 |



|                                                                                              |          |        |
|----------------------------------------------------------------------------------------------|----------|--------|
| Sorting nexin 17                                                                             | SNX17    | 701614 |
| Sorting nexin 3                                                                              | SNX3     | 700989 |
| Sorting nexin 31                                                                             | SNX31    | 705726 |
| Sorting nexin 33                                                                             | SNX33    | 706309 |
| Suppressor of cytokine signaling 2                                                           | SOCS2    | 715772 |
| Suppressor of cytokine signaling 6                                                           | SOCS6    | 704108 |
| Suppressor of cytokine signaling 7                                                           | SOCS7    | 693737 |
| Superoxide dismutase 1, soluble                                                              | SOD1     | 574096 |
| Superoxide dismutase 3, extracellular                                                        | SOD3     | 715931 |
| SON DNA binding protein                                                                      | SON      | 704712 |
| Sorbin and SH3 domain containing 3                                                           | SORBS3   | 716198 |
| SOS Ras/Rho guanine nucleotide exchange factor 2                                             | SOS2     | 705601 |
| SRY-box 13                                                                                   | SOX13    | 700802 |
| SRY-box 3                                                                                    | SOX3     | 696412 |
| SP110 nuclear body protein                                                                   | SP110    | 714244 |
| Sp2 transcription factor                                                                     | SP2      | 694834 |
| Sp3 transcription factor                                                                     | SP3      | 699901 |
| Sperm acrosome associated 1                                                                  | SPACA1   | 699611 |
| Sperm acrosome associated 3                                                                  | SPACA3   | 714491 |
| Sperm associated antigen 9                                                                   | SPAG9    | 707613 |
| SPARC like 1                                                                                 | SPARCL1  | 701468 |
| Spermatogenesis associated 5-like 1                                                          | SPATA5L1 | 713376 |
| Spermatogenesis associated 6                                                                 | SPATA6   | 710827 |
| Spermatogenesis associated 7                                                                 | SPATA7   | 693836 |
| Spermatogenesis associated, serine-rich 1                                                    | SPATS1   | 703218 |
| Spermatogenesis associated, serine rich 2 like                                               | SPATS2L  | 699458 |
| Signal peptidase complex subunit 1                                                           | SPCS1    | 696426 |
| Sperm antigen with calponin homology and coiled-coil domains 1-like                          | SPECC1L  | 707641 |
| Spen family transcriptional repressor                                                        | SPEN     | 696205 |
| Spastic paraplegia 11 (autosomal recessive)                                                  | SPG11    | 712221 |
| Spastic paraplegia 21 (autosomal recessive, Mast syndrome)                                   | SPG21    | 712815 |
| Sphingosine kinase 2                                                                         | SPHK2    | 718088 |
| Serine peptidase inhibitor, Kunitz type, 2                                                   | SPINT2   | 714755 |
| Spla/ryanodine receptor domain and SOCS box containing 1                                     | SPSB1    | 722211 |
| Spectrin, beta, non-erythrocytic 1                                                           | SPTBN1   | 716794 |
| Serine palmitoyltransferase small subunit A                                                  | SPTSSA   | 717580 |
| SRC kinase signaling inhibitor 1                                                             | SRCIN1   | 693662 |
| Serglycin                                                                                    | SRGN     | 712299 |
| Src-related kinase lacking C-terminal regulatory tyrosine and N-terminal myristylation sites | SRMS     | 719587 |
| Signal recognition particle 68kda                                                            | SRP68    | 705568 |
| SRSF protein kinase 1                                                                        | SRPK1    | 719039 |
| SRP receptor alpha subunit                                                                   | SRPRA    | 714215 |
| Serine/arginine repetitive matrix 1                                                          | SRRM1    | 712258 |
| Serine/arginine-rich splicing factor 1                                                       | SRSF1    | 713958 |
| Serine/arginine-rich splicing factor 12                                                      | SRSF12   | 700497 |
| Serine/arginine-rich splicing factor 3                                                       | SRSF3    | 719123 |

|                                                                                |          |        |
|--------------------------------------------------------------------------------|----------|--------|
| Serine/arginine-rich splicing factor 4                                         | SRSF4    | 717401 |
| Serine/arginine-rich splicing factor 7                                         | SRSF7    | 713388 |
| Serine/arginine-rich splicing factor 8                                         | SRSF8    | 699079 |
| Sulfiredoxin 1                                                                 | SRXN1    | 714997 |
| Synovial sarcoma translocation gene on chromosome 18-like 2                    | SS18L2   | 716387 |
| Single-stranded DNA binding protein 1, mitochondrial                           | SSBP1    | 694459 |
| Single stranded DNA binding protein 4                                          | SSBP4    | 719496 |
| Slingshot protein phosphatase 2                                                | SSH2     | 711898 |
| Signal sequence receptor, alpha                                                | SSR1     | 693818 |
| Signal sequence receptor, beta (translocon-associated protein beta)            | SSR2     | 719383 |
| Signal sequence receptor, delta                                                | SSR4     | 697266 |
| Structure specific recognition protein 1                                       | SSRP1    | 706614 |
| Suppression of tumorigenicity 13 (colon carcinoma) (Hsp70 interacting protein) | ST13     | 705664 |
| ST3 beta-galactoside alpha-2,3-sialyltransferase 4                             | ST3GAL4  | 717792 |
| Suppression of tumorigenicity 7                                                | ST7      | 704776 |
| Suppression of tumorigenicity 7 like                                           | ST7L     | 705541 |
| STAM binding protein                                                           | STAMPB   | 714562 |
| Signal transducing adaptor family member 1                                     | STAP1    | 711834 |
| Star related lipid transfer domain containing 3                                | STARD3   | 697212 |
| STARD3 N-terminal like                                                         | STARD3NL | 705212 |
| Star related lipid transfer domain containing 5                                | STARD5   | 713308 |
| Signal transducer and activator of transcription 1                             | STAT1    | 693650 |
| Signal transducer and activator of transcription 2                             | STAT2    | 712694 |
| Signal transducer and activator of transcription 5A                            | STAT5A   | 574129 |
| Staufen double-stranded RNA binding protein 1                                  | STAU1    | 704197 |
| STEAP4 metalloredutase                                                         | STEAP4   | 705096 |
| Stress induced phosphoprotein 1                                                | STIP1    | 717926 |
| Serine/threonine kinase 11 interacting protein                                 | STK11IP  | 704531 |
| Serine/threonine kinase 25                                                     | STK25    | 701297 |
| Serine/threonine kinase 3                                                      | STK3     | 707425 |
| Serine/threonine kinase 36                                                     | STK36    | 699940 |
| Serine/threonine kinase 38                                                     | STK38    | 719169 |
| Stomatin like 2                                                                | STOML2   | 698458 |
| Storkhead box 2                                                                | STOX2    | 693692 |
| STE20-related kinase adaptor alpha                                             | STRADA   | 717927 |
| Spermatid perinuclear RNA binding protein                                      | STRBP    | 695402 |
| Striatin interacting protein 1                                                 | STRIP1   | 700799 |
| Striatin                                                                       | STRN     | 708491 |
| STT3A, subunit of the oligosaccharyltransferase complex (catalytic)            | STT3A    | 717056 |
| STIP1 homology and U-box containing protein 1, E3 ubiquitin protein ligase     | STUB1    | 697105 |
| Syntaxin 11                                                                    | STX11    | 699733 |
| Syntaxin 12                                                                    | STX12    | 716455 |
| Syntaxin binding protein 1                                                     | STXBP1   | 707185 |
| SUB1 homolog, transcriptional regulator                                        | SUB1     | 701045 |
| Succinate-coa ligase, GDP-forming, beta subunit                                | SUCLG2   | 697454 |

|                                                                              |         |        |
|------------------------------------------------------------------------------|---------|--------|
| SUN domain containing ossification factor                                    | SUCO    | 705776 |
| Suppressor of fused homolog (Drosophila)                                     | SUFU    | 713576 |
| SURP and G-patch domain containing 1                                         | SUGP1   | 719772 |
| SURP and G-patch domain containing 2                                         | SUGP2   | 719666 |
| SGT1 homolog, MIS12 kinetochore complex assembly<br>cochaperone              | SUGT1   | 694046 |
| Small ubiquitin-like modifier 1                                              | SUMO1   | 703644 |
| SPT4 homolog, DSIF elongation factor subunit                                 | SUPT4H1 | 710214 |
| SPT5 homolog, DSIF elongation factor subunit                                 | SUPT5H  | 697337 |
| Small vasohibin binding protein                                              | SVBP    | 698308 |
| Supervillin                                                                  | SVIL    | 695267 |
| SWT1, RNA endoribonuclease homolog                                           | SWT1    | 714083 |
| Synergism, gamma                                                             | SYNRG   | 717750 |
| Synaptophysin                                                                | SYP     | 715739 |
| Synaptophysin-like 1                                                         | SYPL1   | 698350 |
| Synaptotagmin 14                                                             | SYT14   | 717383 |
| Synaptotagmin VII                                                            | SYT7    | 722368 |
| Synaptotagmin like 1                                                         | SYTL1   | 715833 |
| Synaptotagmin like 2                                                         | SYTL2   | 703187 |
| TGF-beta activated kinase 1/MAP3K7 binding protein 1                         | TAB1    | 703409 |
| TGF-beta activated kinase 1/MAP3K7 binding protein 2                         | TAB2    | 696875 |
| Transforming, acidic coiled-coil containing protein 3                        | TACC3   | 712898 |
| Translational activator of mitochondrially encoded<br>cytochrome c oxidase I | TACO1   | 717828 |
| Transcriptional adaptor 3                                                    | TADA3   | 700090 |
| TATA-box binding protein associated factor 12                                | TAF12   | 717135 |
| TATA-box binding protein associated factor, RNA<br>polymerase I, D           | TAF1D   | 696602 |
| TATA-box binding protein associated factor 5                                 | TAF5    | 714558 |
| TATA-box binding protein associated factor 5 like                            | TAF5L   | 693770 |
| TATA-box binding protein associated factor 9                                 | TAF9    | 700239 |
| T-cell activation rhoGTPase activating protein                               | TAGAP   | 701690 |
| TRAF family member associated NFkB activator                                 | TANK    | 700942 |
| TAO kinase 2                                                                 | TAOK2   | 707777 |
| Transporter 1, ATP-binding cassette, sub-family B (MDR/TAP)                  | TAP1    | 717726 |
| TAP binding protein (tapasin)                                                | TAPBP   | 718235 |
| TAR (HIV-1) RNA binding protein 1                                            | TARBP1  | 712397 |
| TAR (HIV-1) RNA binding protein 2                                            | TARBP2  | 703294 |
| Taspase 1                                                                    | TASP1   | 694028 |
| Tatd dnase domain containing 1                                               | TATDN1  | 706095 |
| Tax1 (human T-cell leukemia virus type I) binding protein 1                  | TAX1BP1 | 698103 |
| Tafazzin                                                                     | TAZ     | 574297 |
| TBC1 domain family member 17                                                 | TBC1D17 | 719093 |
| TBC1 domain family member 25                                                 | TBC1D25 | 710596 |
| TBC1 domain family member 9                                                  | TBC1D9  | 702230 |
| Tubulin folding cofactor E                                                   | TBCE    | 711476 |
| Tubulin folding cofactor E-like                                              | TBCEL   | 706506 |
| TBK1 binding protein 1                                                       | TBKBP1  | 693913 |

|                                                                               |          |           |
|-------------------------------------------------------------------------------|----------|-----------|
| Transducin (beta)-like 1 X-linked receptor 1                                  | TBL1XR1  | 712740    |
| T-box 21                                                                      | TBX21    | 694044    |
| Transcription elongation factor A (SII), 2                                    | TCEA2    | 694026    |
| Transcription elongation factor A (SII)-like 3                                | TCEAL3   | 696692    |
| Transcription elongation factor A (SII)-like 4                                | TCEAL4   | 696453    |
| Transcription elongation factor A (SII)-like 7                                | TCEAL7   | 695831    |
| Transcription elongation factor A (SII)-like 8                                | TCEAL8   | 695496    |
| Transcription elongation factor B (SIII), polypeptide 1 (15kda, elongin C)    | TCEB1    | 698922    |
| Transcription factor 4                                                        | TCF4     | 695814    |
| T-cell leukemia/lymphoma 1B                                                   | TCL1B    | 703241    |
| T-complex 11, testis-specific                                                 | TCP11    | 718695    |
| T-complex 11, testis-specific-like 1                                          | TCP11L1  | 694899    |
| Tectonic family member 3                                                      | TCTN3    | 703844    |
| Tyrosyl-DNA phosphodiesterase 2                                               | TDP2     | 715162    |
| Tudor domain containing 3                                                     | TDRD3    | 696228    |
| Tudor domain containing 7                                                     | TDRD7    | 641450    |
| Trans-2,3-enoyl-coa reductase                                                 | TECR     | 718928    |
| TEK tyrosine kinase, endothelial                                              | TEK      | 707455    |
| Telomeric repeat binding factor 2, interacting protein                        | TERF2IP  | 712149    |
| Testis-specific kinase 1                                                      | TESK1    | 697206    |
| Testis expressed 10                                                           | TEX10    | 714536    |
| Testis expressed 26                                                           | TEX26    | 713363    |
| Testis expressed 28                                                           | TEX28    | 699141    |
| Testis expressed 30                                                           | TEX30    | 701917    |
| Transcription factor A, mitochondrial                                         | TFAM     | 701368    |
| Transcription factor AP-2 delta (activating enhancer binding protein 2 delta) | TFAP2D   | 707582    |
| Transcription factor B1, mitochondrial                                        | TFB1M    | 701830    |
| Transcription factor binding to IGHM enhancer 3                               | TFE3     | 712161    |
| TRK-fused gene                                                                | TFG      | 700972    |
| Tuftelin interacting protein 11                                               | TFIP11   | 712691    |
| TCF3 (E2A) fusion partner (in childhood Leukemia)                             | TFPT     | 720296    |
| Transforming growth factor beta 1 induced transcript 1                        | TGFB1I1  | 714172    |
| Transforming growth factor beta 2                                             | TGFB2    | 707540    |
| Transforming growth factor beta receptor associated protein 1                 | TGFBRAP1 | 713102    |
| Transglutaminase 5                                                            | TGM5     | 712605    |
| THAP domain containing 7                                                      | THAP7    | 696208    |
| THO complex 1                                                                 | THOC1    | 697954    |
| THO complex 6                                                                 | THOC6    | 700217    |
| Thyroid hormone receptor associated protein 3                                 | THRAP3   | 713033    |
| Thrombospondin type 1 domain containing 1                                     | THSD1    | 100430744 |
| THUMP domain containing 2                                                     | THUMPD2  | 712045    |
| Thy-1 cell surface antigen                                                    | THY1     | 705321    |
| Thymocyte nuclear protein 1                                                   | THYN1    | 700413    |
| Toll-like receptor adaptor molecule 1                                         | TICAM1   | 574294    |
| Translocase of inner mitochondrial membrane 10 homolog B (yeast)              | TIMM10B  | 711085    |

|                                                                  |          |           |
|------------------------------------------------------------------|----------|-----------|
| Translocase of inner mitochondrial membrane 17 homolog A (yeast) | TIMM17A  | 707001    |
| Translocase of inner mitochondrial membrane 17 homolog B (yeast) | TIMM17B  | 714895    |
| Translocase of inner mitochondrial membrane 44 homolog (yeast)   | TIMM44   | 709800    |
| Translocase of inner mitochondrial membrane 8 homolog B (yeast)  | TIMM8B   | 711249    |
| Tubulointerstitial nephritis antigen-like 1                      | TINAGL1  | 705660    |
| TERF1 (TRF1)-interacting nuclear factor 2                        | TINF2    | 715812    |
| TCDD-inducible poly(ADP-ribose) polymerase                       | TIPARP   | 706180    |
| Triokinase/FMN cyclase                                           | TKFC     | 694117    |
| Transducin like enhancer of split 3                              | TLE3     | 698046    |
| TM2 domain containing 2                                          | TM2D2    | 701007    |
| Transmembrane 4 L six family member 5                            | TM4SF5   | 709844    |
| Transmembrane 6 superfamily member 2                             | TM6SF2   | 719756    |
| Transmembrane 9 superfamily member 1                             | TM9SF1   | 715472    |
| Transmembrane 9 superfamily protein member 4                     | TM9SF4   | 712260    |
| Transmembrane p24 trafficking protein 1                          | TMED1    | 713618    |
| Transmembrane p24 trafficking protein 3                          | TMED3    | 711993    |
| Transmembrane p24 trafficking protein 4                          | TMED4    | 699105    |
| Transmembrane p24 trafficking protein 7                          | TMED7    | 100533192 |
| Transmembrane protein 104                                        | TMEM104  | 698592    |
| Transmembrane protein 115                                        | TMEM115  | 702164    |
| Transmembrane protein 121                                        | TMEM121  | 700005    |
| Transmembrane protein 125                                        | TMEM125  | 699920    |
| Transmembrane protein 126A                                       | TMEM126A | 702831    |
| Transmembrane protein 126B                                       | TMEM126B | 702719    |
| Transmembrane protein 135                                        | TMEM135  | 704963    |
| Transmembrane protein 138                                        | TMEM138  | 693905    |
| Transmembrane protein 145                                        | TMEM145  | 709268    |
| Transmembrane protein 14C                                        | TMEM14C  | 697976    |
| Transmembrane protein 150A                                       | TMEM150A | 696101    |
| Transmembrane protein 156                                        | TMEM156  | 698617    |
| Transmembrane protein 160                                        | TMEM160  | 716996    |
| Transmembrane protein 163                                        | TMEM163  | 709015    |
| Transmembrane protein 164                                        | TMEM164  | 705380    |
| Transmembrane protein 165                                        | TMEM165  | 696262    |
| Transmembrane protein 168                                        | TMEM168  | 702972    |
| Transmembrane protein 19                                         | TMEM19   | 718700    |
| Transmembrane protein 204                                        | TMEM204  | 701926    |
| Transmembrane protein 208                                        | TMEM208  | 697228    |
| Transmembrane protein 216                                        | TMEM216  | 693655    |
| Transmembrane protein 218                                        | TMEM218  | 100430360 |
| Transmembrane protein 243                                        | TMEM243  | 706405    |
| Transmembrane protein 245                                        | TMEM245  | 710299    |
| Transmembrane protein 248                                        | TMEM248  | 695654    |
| Transmembrane protein 254                                        | TMEM254  | 701130    |

|                                                                          |          |           |
|--------------------------------------------------------------------------|----------|-----------|
| Transmembrane protein 261                                                | TMEM261  | 716818    |
| Transmembrane protein 266                                                | TMEM266  | 707482    |
| Transmembrane protein 27                                                 | TMEM27   | 712928    |
| Transmembrane protein 30A                                                | TMEM30A  | 717907    |
| Transmembrane protein 31                                                 | TMEM31   | 100429776 |
| Transmembrane protein 33                                                 | TMEM33   | 702063    |
| Transmembrane protein 37                                                 | TMEM37   | 695060    |
| Transmembrane protein 38B                                                | TMEM38B  | 715679    |
| Transmembrane protein 39B                                                | TMEM39B  | 706700    |
| Transmembrane protein 42                                                 | TMEM42   | 714654    |
| Transmembrane protein 44                                                 | TMEM44   | 708003    |
| Transmembrane protein 45A                                                | TMEM45A  | 700594    |
| Transmembrane protein 45B                                                | TMEM45B  | 718735    |
| Transmembrane protein 5                                                  | TMEM5    | 717102    |
| Transmembrane protein 55A                                                | TMEM55A  | 696779    |
| Transmembrane protein 57                                                 | TMEM57   | 654415    |
| Transmembrane protein 59                                                 | TMEM59   | 714942    |
| Transmembrane protein 94                                                 | TMEM94   | 702374    |
| Transmembrane and immunoglobulin domain containing 3                     | TMIGD3   | 104564312 |
| Tropomodulin 4                                                           | TMOD4    | 709732    |
| Transmembrane protease, serine 13                                        | TMPRSS13 | 698586    |
| TNF alpha induced protein 6                                              | TNFAIP6  | 694699    |
| Tumor necrosis factor receptor superfamily member 25                     | TNFRSF25 | 703744    |
| Tumor necrosis factor (ligand) superfamily, member 12                    | TNFSF12  | 100551504 |
| Tumor necrosis factor superfamily member 13                              | TNFSF13  | 100551504 |
| Tumor necrosis factor superfamily member 13b                             | TNFSF13B | 693917    |
| Tumor necrosis factor superfamily member 8                               | TNFSF8   | 702944    |
| Tyrosine kinase, non-receptor, 1                                         | TNK1     | 715180    |
| Tyrosine kinase, non-receptor, 2                                         | TNK2     | 711655    |
| Tankyrase, TRF1-interacting ankyrin-related ADP-ribose polymerase 2      | TNKS2    | 698050    |
| Troponin T type 2 (cardiac)                                              | TNNT2    | 709882    |
| Transportin 2                                                            | TNPO2    | 717710    |
| Trinucleotide repeat containing 6A                                       | TNRC6A   | 701680    |
| Transducer of ERBB2, 1                                                   | TOB1     | 706873    |
| Translocase of outer mitochondrial membrane 70 homolog A (S. Cerevisiae) | TOMM70A  | 700347    |
| Topoisomerase (DNA) II beta                                              | TOP2B    | 677709    |
| Topoisomerase (DNA) III beta                                             | TOP3B    | 698317    |
| Topoisomerase (DNA) II binding protein 1                                 | TOPBP1   | 719054    |
| Torsin family 1, member A (torsin A)                                     | TOR1A    | 722520    |
| Torsin family 2, member A                                                | TOR2A    | 700203    |
| Tumor protein p53                                                        | TP53     | 716170    |
| Tumor protein p53 binding protein 1                                      | TP53BP1  | 710237    |
| Tumor protein p53 inducible nuclear protein 2                            | TP53INP2 | 707113    |
| Tumor protein D52-like 1                                                 | TPD52L1  | 716568    |
| Tropomyosin 1 (alpha)                                                    | TPM1     | 705236    |
| Tropomyosin 2 (beta)                                                     | TPM2     | 696604    |

|                                                                       |          |           |
|-----------------------------------------------------------------------|----------|-----------|
| Translocated promoter region, nuclear basket protein                  | TPR      | 713910    |
| Transmembrane protein, adipocyte associated 1                         | TPRA1    | 707221    |
| Tryptase gamma 1                                                      | TPSG1    | 100425752 |
| Tumor protein, translationally-controlled 1                           | TPT1     | 702155    |
| Transmembrane phosphoinositide 3-phosphatase and<br>tensin homolog 2  | TPTE2    | 704870    |
| Transformer 2 alpha homolog (Drosophila)                              | TRA2A    | 574247    |
| Transformer 2 beta homolog (Drosophila)                               | TRA2B    | 574337    |
| TRAF3 interacting protein 2                                           | TRAF3IP2 | 697530    |
| TRAF3 interacting protein 3                                           | TRAF3IP3 | 712895    |
| TNF receptor associated factor 6                                      | TRAF6    | 716907    |
| TNF receptor associated factor 7                                      | TRAF7    | 695415    |
| TRAF-type zinc finger domain containing 1                             | TRAFD1   | 711635    |
| Trafficking protein, kinesin binding 2                                | TRAK2    | 701779    |
| TNF receptor-associated protein 1                                     | TRAP1    | 706234    |
| Trafficking protein particle complex 11                               | TRAPPC11 | 702066    |
| Tripartite motif containing 11                                        | TRIM11   | 694150    |
| Tripartite motif containing 14                                        | TRIM14   | 715418    |
| Tripartite motif containing 23                                        | TRIM23   | 696386    |
| Tripartite motif containing 24                                        | TRIM24   | 710229    |
| Tripartite motif containing 27                                        | TRIM27   | 706129    |
| Tripartite motif containing 32                                        | TRIM32   | 702595    |
| Tripartite motif containing 33                                        | TRIM33   | 710600    |
| Tripartite motif containing 37                                        | TRIM37   | 710934    |
| Tripartite motif containing 41                                        | TRIM41   | 708426    |
| Tripartite motif containing 46                                        | TRIM46   | 717498    |
| Tripartite motif containing 62                                        | TRIM62   | 709927    |
| Tripartite motif containing 7                                         | TRIM7    | 708324    |
| Tripartite motif containing 8                                         | TRIM8    | 713701    |
| Thyroid hormone receptor interactor 11                                | TRIP11   | 697489    |
| Thyroid hormone receptor interactor 12                                | TRIP12   | 710560    |
| Thyroid hormone receptor interactor 4                                 | TRIP4    | 707263    |
| Trna isopentenyltransferase 1                                         | TRIT1    | 716422    |
| Trna methyltransferase O                                              | TRMO     | 715609    |
| Trna methyltransferase 1                                              | TRMT1    | 718227    |
| Trna methyltransferase 11 homolog                                     | TRMT11   | 712712    |
| Trna methyltransferase 1 like                                         | TRMT1L   | 714319    |
| Trna methyltransferase 6                                              | TRMT6    | 718229    |
| Trna 5-methylaminomethyl-2-thiouridylate methyltransferase            | TRMU     | 714268    |
| Transient receptor potential cation channel, subfamily M,<br>member 5 | TRPM5    | 705070    |
| Transient receptor potential cation channel, subfamily V,<br>member 4 | TRPV4    | 709605    |
| TSSK6 activating co-chaperone                                         | TSACC    | 719490    |
| TSC22 domain family member 1                                          | TSC22D1  | 701076    |
| TSC22 domain family member 3                                          | TSC22D3  | 702656    |
| TSC22 domain family member 4                                          | TSC22D4  | 719183    |
| Trna splicing endonuclease subunit 15                                 | TSEN15   | 717481    |

|                                                           |         |           |
|-----------------------------------------------------------|---------|-----------|
| Teashirt zinc finger homeobox 1                           | TSHZ1   | 703018    |
| Testis-specific serine kinase substrate                   | TSKS    | 719028    |
| Tetraspanin 15                                            | TSPAN15 | 711675    |
| Tetraspanin 18                                            | TSPAN18 | 715506    |
| Tetraspanin 3                                             | TSPAN3  | 708428    |
| TSPY-like 4                                               | TSPYL4  | 716137    |
| Testis-specific serine kinase 3                           | TSSK3   | 708182    |
| Thiosulfate sulfurtransferase (rhodanese)                 | TST     | 698021    |
| Tetratricopeptide repeat domain 16                        | TTC16   | 706784    |
| Tetratricopeptide repeat domain 21A                       | TTC21A  | 694904    |
| Tetratricopeptide repeat domain 27                        | TTC27   | 707021    |
| Tetratricopeptide repeat domain 32                        | TTC32   | 700947    |
| Tetratricopeptide repeat domain 7B                        | TTC7B   | 696029    |
| TELO2 interacting protein 1                               | TTI1    | 699930    |
| Tubulin alpha 1a                                          | TUBA1A  | 574194    |
| Tubulin, alpha 1b                                         | TUBA1B  | 709643    |
| Tubulin alpha 3c                                          | TUBA3C  | 707215    |
| Tubulin alpha 4a                                          | TUBA4A  | 702583    |
| Tubulin alpha like 3                                      | TUBAL3  | 722506    |
| Tubulin beta class I                                      | TUBB    | 574113    |
| Twist family bhlh transcription factor 2                  | TWIST2  | 697078    |
| TWIST neighbor                                            | TWISTNB | 707781    |
| Twisted gastrulation homolog 1 (Drosophila)               | TWSG1   | 705804    |
| Thioredoxin                                               | TXN     | 712587    |
| Thioredoxin domain containing 12 (endoplasmic reticulum)  | TXNDC12 | 712891    |
| Thioredoxin domain containing 17                          | TXNDC17 | 712910    |
| Thioredoxin domain containing 9                           | TXNDC9  | 709303    |
| Thioredoxin like 1                                        | TXNL1   | 695194    |
| Thioredoxin like 4A                                       | TXNL4A  | 698969    |
| Thioredoxin reductase 1                                   | TXNRD1  | 701062    |
| Thymidine phosphorylase                                   | TYMP    | 716161    |
| UDP-N-acetylglucosamine pyrophosphorylase 1               | UAP1    | 720116    |
| Ubiquitin-like modifier activating enzyme 2               | UBA2    | 705808    |
| Ubiquitin-like modifier activating enzyme 3               | UBA3    | 696493    |
| Ubiquitin A-52 residue ribosomal protein fusion product 1 | UBA52   | 720243    |
| Ubiquitin associated and SH3 domain containing A          | UBASH3A | 722456    |
| Ubiquitin B                                               | UBB     | 696110    |
| Ubiquitin conjugating enzyme E2A                          | UBE2A   | 693716    |
| Ubiquitin conjugating enzyme E2D 4 (putative)             | UBE2D4  | 707831    |
| Ubiquitin-conjugating enzyme E2E 2                        | UBE2E2  | 699101    |
| Ubiquitin conjugating enzyme E2E 3                        | UBE2E3  | 704530    |
| Ubiquitin conjugating enzyme E2F (putative)               | UBE2F   | 695394    |
| Ubiquitin conjugating enzyme E2I                          | UBE2I   | 722434    |
| Ubiquitin conjugating enzyme E2O                          | UBE2O   | 710529    |
| Ubiquitin conjugating enzyme E2 variant 1                 | UBE2V1  | 100425552 |
| Ubiquitin protein ligase E3B                              | UBE3B   | 707324    |
| Ubiquitination factor E4B                                 | UBE4B   | 713348    |
| Ubiquitin family domain containing 1                      | UBFD1   | 700601    |



|                                                                   |        |           |
|-------------------------------------------------------------------|--------|-----------|
| Ubiquitin like 5                                                  | UBL5   | 711015    |
| Ubiquitin like 7                                                  | UBL7   | 702305    |
| U-box domain containing 5                                         | UBOX5  | 717166    |
| Upstream binding protein 1 (LBP-1a)                               | UBP1   | 706283    |
| Ubiquilin 1                                                       | UBQLN1 | 713525    |
| Ubiquitin protein ligase E3 component n-recognin 7 (putative)     | UBR7   | 698882    |
| Ubiquitin domain containing 2                                     | UBTD2  | 709455    |
| UBX domain protein 1                                              | UBXN1  | 718643    |
| UBX domain protein 10                                             | UBXN10 | 705058    |
| UBX domain protein 11                                             | UBXN11 | 719826    |
| Ubiquitin C-terminal hydrolase L3                                 | UCHL3  | 697276    |
| Uridine-cytidine kinase 2                                         | UCK2   | 695725    |
| UFM1-specific ligase 1                                            | UFL1   | 704454    |
| Ubiquitin interaction motif containing 1                          | UIMC1  | 705412    |
| Uracil DNA glycosylase                                            | UNG    | 706816    |
| UPF3 regulator of nonsense transcripts homolog B (yeast)          | UPF3B  | 694247    |
| Uroplakin 2                                                       | UPK2   | 707184    |
| Uridine phosphorylase 1                                           | UPP1   | 695317    |
| Uracil phosphoribosyltransferase homolog                          | UPRT   | 704157    |
| Ubiquinol-cytochrome c reductase, 6.4kda subunit                  | UQCR   | 708396    |
| Ubiquinol-cytochrome c reductase core protein II                  | UQCRC2 | 697967    |
| Ubiquinol-cytochrome c reductase, complex III subunit VII, 9.5kda | UQCRQ  | 708950    |
| Ubiquitin related modifier 1                                      | URM1   | 722618    |
| Unconventional SNARE in the ER 1 homolog (S. Cerevisiae)          | USE1   | 718905    |
| Usher syndrome 1C                                                 | USH1C  | 696911    |
| Up-regulated during skeletal muscle growth 5 homolog (mouse)      | USMG5  | 100428448 |
| Ubiquitin specific peptidase 10                                   | USP10  | 718471    |
| Ubiquitin specific peptidase 11                                   | USP11  | 706555    |
| Ubiquitin specific peptidase 15                                   | USP15  | 716793    |
| Ubiquitin specific peptidase 16                                   | USP16  | 706403    |
| Ubiquitin specific peptidase 20                                   | USP20  | 716505    |
| Ubiquitin specific peptidase 21                                   | USP21  | 719894    |
| Ubiquitin specific peptidase 3                                    | USP3   | 705973    |
| Ubiquitin specific peptidase 32                                   | USP32  | 716857    |
| Ubiquitin specific peptidase 38                                   | USP38  | 700235    |
| Ubiquitin specific peptidase 39                                   | USP39  | 696217    |
| Ubiquitin specific peptidase 45                                   | USP45  | 694340    |
| Ubiquitin specific peptidase 48                                   | USP48  | 707110    |
| Ubiquitin specific peptidase 51                                   | USP51  | 705861    |
| USP6 N-terminal like                                              | USP6NL | 694275    |
| Ubiquitin specific peptidase 8                                    | USP8   | 715523    |
| Ubiquitin specific peptidase 9, Y-linked                          | USP9Y  | 100270704 |
| UTP14, U3 small nucleolar ribonucleoprotein, homolog C (yeast)    | UTP14C | 709657    |
| UTP6 small subunit processome component                           | UTP6   | 713361    |
| UV radiation resistance associated                                | UVRAG  | 696601    |
| Vesicle associated membrane protein 7                             | VAMP7  | 704160    |
| Valyl-trna synthetase                                             | VARS   | 715537    |

|                                                                                   |         |           |
|-----------------------------------------------------------------------------------|---------|-----------|
| Vav guanine nucleotide exchange factor 3                                          | VAV3    | 694685    |
| Versican                                                                          | VCAN    | 712365    |
| Valosin containing protein lysine (K) methyltransferase                           | VCPKMT  | 705487    |
| Voltage-dependent anion channel 1                                                 | VDAC1   | 710045    |
| Voltage-dependent anion channel 2                                                 | VDAC2   | 704257    |
| Vascular endothelial growth factor C                                              | VEGFC   | 699502    |
| Vezatin, adherens junctions transmembrane protein                                 | VEZT    | 716675    |
| Villin-like                                                                       | VILL    | 696988    |
| VPS33B interacting protein, apical-basolateral polarity regulator, spe-39 homolog | VIPAS39 | 706315    |
| VPS11, CORVET/HOPS core subunit                                                   | VPS11   | 702834    |
| Vacuolar protein sorting 13 homolog C (S. Cerevisiae)                             | VPS13C  | 709080    |
| Vacuolar protein sorting 36 homolog (S. Cerevisiae)                               | VPS36   | 693290    |
| Vacuolar protein sorting 45 homolog (S. Cerevisiae)                               | VPS45   | 706035    |
| VPS52 GARP complex subunit                                                        | VPS52   | 100430904 |
| Vacuolar protein sorting 72 homolog (S. Cerevisiae)                               | VPS72   | 709818    |
| VPS8, CORVET complex subunit                                                      | VPS8    | 701567    |
| Vaccinia related kinase 1                                                         | VRK1    | 704798    |
| Vitronectin                                                                       | VTN     | 708499    |
| Von Willebrand factor A domain containing 1                                       | VWA1    | 701765    |
| WW domain containing adaptor with coiled-coil                                     | WAC     | 715828    |
| Tryptophanyl trna synthetase 2, mitochondrial                                     | WARS2   | 712332    |
| Wiskott-Aldrich syndrome-like                                                     | WASL    | 696556    |
| WW domain binding protein 1                                                       | WBP1    | 709202    |
| WW domain binding protein 11                                                      | WBP11   | 699451    |
| WW domain binding protein 5                                                       | WBP5    | 696661    |
| WD repeat domain 11                                                               | WDR11   | 714990    |
| WD repeat domain 12                                                               | WDR12   | 705623    |
| WD repeat domain 18                                                               | WDR18   | 704547    |
| WD repeat domain 19                                                               | WDR19   | 698866    |
| WD repeat domain 20                                                               | WDR20   | 708533    |
| WD repeat domain 26                                                               | WDR26   | 704911    |
| WD repeat domain 3                                                                | WDR3    | 711960    |
| WD repeat domain 4                                                                | WDR4    | 714230    |
| WD repeat domain 44                                                               | WDR44   | 710598    |
| WD repeat domain 47                                                               | WDR47   | 696942    |
| WD repeat domain 59                                                               | WDR59   | 710576    |
| WD repeat domain 6                                                                | WDR6    | 708505    |
| WD repeat domain 61                                                               | WDR61   | 709971    |
| WD repeat domain 70                                                               | WDR70   | 706130    |
| WD repeat domain 74                                                               | WDR74   | 718460    |
| WD repeat domain 75                                                               | WDR75   | 709104    |
| WD repeat domain 77                                                               | WDR77   | 677686    |
| WAP four-disulfide core domain 10A                                                | WFDC10A | 717384    |
| WNT1 inducible signaling pathway protein 2                                        | WISP2   | 717872    |
| Wingless-type MMTV integration site family member 10A                             | WNT10A  | 700692    |
| Wingless-type MMTV integration site family member 10B                             | WNT10B  | 708906    |
| Wingless-type MMTV integration site family member 3                               | WNT3    | 716909    |

|                                                                               |         |        |
|-------------------------------------------------------------------------------|---------|--------|
| Wingless-type MMTV integration site family member 7B                          | WNT7B   | 713864 |
| WD repeat containing, antisense to TP53                                       | WRAP53  | 716125 |
| Werner helicase interacting protein 1                                         | WRNIP1  | 707250 |
| Wilms tumor 1 associated protein                                              | WTAP    | 702295 |
| WW domain containing E3 ubiquitin protein ligase 2                            | WWP2    | 705464 |
| XPA binding protein 2                                                         | XAB2    | 704109 |
| X-box binding protein 1                                                       | XBP1    | 713863 |
| X-linked Kx blood group related, X-linked                                     | XKRX    | 701721 |
| Xeroderma pigmentosum, complementation group A                                | XPA     | 715705 |
| Xeroderma pigmentosum, complementation group C                                | XPC     | 700938 |
| X-prolyl aminopeptidase (aminopeptidase P) 2, membrane-bound                  | XPNPEP2 | 701972 |
| Exportin 1                                                                    | XPO1    | 718063 |
| X-ray repair complementing defective repair in Chinese hamster cells 6        | XRCC6   | 707975 |
| 5'-3' exoribonuclease 2                                                       | XRN2    | 700934 |
| Yae1 domain containing 1                                                      | YAE1D1  | 703786 |
| Tyrosyl-trna synthetase                                                       | YARS    | 709003 |
| Y-box binding protein 3                                                       | YBX3    | 722347 |
| YEATS domain containing 4                                                     | YEATS4  | 718376 |
| Yip1 domain family member 4                                                   | YIPF4   | 706819 |
| Yippee like 3                                                                 | YPEL3   | 708740 |
| Tyrosine 3-monooxygenase/tryptophan 5-monooxygenase activation protein, beta  | YWHAB   | 717788 |
| Tyrosine 3-monooxygenase/tryptophan 5-monooxygenase activation protein, gamma | YWHAG   | 715517 |
| Tyrosine 3-monooxygenase/tryptophan 5-monooxygenase activation protein, eta   | YWHAH   | 717016 |
| Zinc binding alcohol dehydrogenase domain containing 2                        | ZADH2   | 701079 |
| Zinc finger, BED-type containing 8                                            | ZBED8   | 695905 |
| Zinc finger and BTB domain containing 17                                      | ZBTB17  | 696327 |
| Zinc finger and BTB domain containing 26                                      | ZBTB26  | 698776 |
| Zinc finger and BTB domain containing 33                                      | ZBTB33  | 695801 |
| Zinc finger and BTB domain containing 39                                      | ZBTB39  | 713914 |
| Zinc finger and BTB domain containing 40                                      | ZBTB40  | 708181 |
| Zinc finger and BTB domain containing 48                                      | ZBTB48  | 704628 |
| Zinc finger and BTB domain containing 49                                      | ZBTB49  | 712422 |
| Zinc finger and BTB domain containing 5                                       | ZBTB5   | 718482 |
| Zinc finger and BTB domain containing 6                                       | ZBTB6   | 695858 |
| Zinc finger and BTB domain containing 8 opposite strand                       | ZBTB8OS | 708590 |
| Zinc finger and BTB domain containing 9                                       | ZBTB9   | 718391 |
| Zinc finger CCCH-type containing 12A                                          | ZC3H12A | 713604 |
| Zinc finger CCCH-type containing 3                                            | ZC3H3   | 708584 |
| Zinc finger CCCH-type containing 7A                                           | ZC3H7A  | 711984 |
| Zinc finger, CCHC domain containing 11                                        | ZCCHC11 | 713406 |
| Zinc finger, CCHC domain containing 14                                        | ZCCHC14 | 703833 |
| Zinc finger, CCHC domain containing 17                                        | ZCCHC17 | 705172 |
| Zinc finger, CCHC domain containing 6                                         | ZCCHC6  | 693660 |
| Zinc finger, CCHC domain containing 7                                         | ZCCHC7  | 716658 |

|                                            |          |           |
|--------------------------------------------|----------|-----------|
| Zinc finger, CCHC domain containing 8      | ZCCHC8   | 702359    |
| Zinc finger, DHHC-type containing 12       | ZDHHC12  | 722606    |
| Zinc finger, DHHC-type containing 16       | ZDHHC16  | 705982    |
| Zinc finger E-box binding homeobox 2       | ZEB2     | 705439    |
| Zyg-11 related, cell cycle regulator       | ZER1     | 717262    |
| Zinc finger, AN1-type domain 2A            | ZFAND2A  | 100426344 |
| Zinc finger, C3H1-type containing          | ZFC3H1   | 718671    |
| ZFP36 ring finger protein                  | ZFP36    | 722000    |
| Zinc finger RNA binding protein            | ZFR      | 696882    |
| Zinc finger protein, X-linked              | ZFX      | 106992280 |
| Zinc finger, CCCH-type with G-patch domain | ZGPAT    | 719499    |
| Zinc finger, matrin-type 2                 | ZMAT2    | 697247    |
| Zinc finger, matrin-type 5                 | ZMAT5    | 715058    |
| Zinc metalloproteinase STE24               | ZMPSTE24 | 693765    |
| Zinc finger, MYM-type 2                    | ZMYM2    | 721255    |
| Zinc finger, MYM-type 3                    | ZMYM3    | 697147    |
| Zinc finger, MYND-type containing 11       | ZMYND11  | 708761    |
| Zinc finger, MYND-type containing 12       | ZMYND12  | 696941    |
| Zinc finger protein 140                    | ZNF140   | 695171    |
| Zinc finger protein 155                    | ZNF155   | 712736    |
| Zinc finger protein 17                     | ZNF17    | 707664    |
| Zinc finger protein 180                    | ZNF180   | 712493    |
| Zinc finger protein 181                    | ZNF181   | 106992424 |
| Zinc finger protein 207                    | ZNF207   | 100689488 |
| Zinc finger protein 211                    | ZNF211   | 100429296 |
| Zinc finger protein 22                     | ZNF22    | 706208    |
| Zinc finger protein 25                     | ZNF25    | 701129    |
| Zinc finger protein 250                    | ZNF250   | 704805    |
| Zinc finger protein 280D                   | ZNF280D  | 699509    |
| Zinc finger protein 281                    | ZNF281   | 709466    |
| Zinc finger protein 285                    | ZNF285   | 106994792 |
| Zinc finger protein 296                    | ZNF296   | 713620    |
| Zinc finger protein 319                    | ZNF319   | 706286    |
| Zinc finger protein 32                     | ZNF32    | 705373    |
| Zinc finger protein 322                    | ZNF322   | 701098    |
| Zinc finger protein 334                    | ZNF334   | 706702    |
| Zinc finger protein 354B                   | ZNF354B  | 712885    |
| Zinc finger protein 362                    | ZNF362   | 710013    |
| Zinc finger protein 385A                   | ZNF385A  | 705436    |
| Zinc finger protein 41                     | ZNF41    | 706770    |
| Zinc finger protein 410                    | ZNF410   | 698124    |
| Zinc finger protein 436                    | ZNF436   | 709638    |
| Zinc finger protein 460                    | ZNF460   | 710080    |
| Zinc finger protein 462                    | ZNF462   | 711489    |
| Zinc finger protein 496                    | ZNF496   | 709694    |
| Zinc finger protein 503                    | ZNF503   | 703912    |
| Zinc finger protein 521                    | ZNF521   | 709169    |
| Zinc finger protein 526                    | ZNF526   | 707135    |

|                                                                       |         |           |
|-----------------------------------------------------------------------|---------|-----------|
| Zinc finger protein 532                                               | ZNF532  | 701146    |
| Zinc finger protein 540                                               | ZNF540  | 714105    |
| Zinc finger protein 557                                               | ZNF557  | 100424984 |
| Zinc finger protein 572                                               | ZNF572  | 712116    |
| Zinc finger protein 573                                               | ZNF573  | 719389    |
| Zinc finger protein 595                                               | ZNF595  | 716693    |
| Zinc finger protein 613                                               | ZNF613  | 719851    |
| Zinc finger protein 620                                               | ZNF620  | 100423712 |
| Zinc finger protein 622                                               | ZNF622  | 100429384 |
| Zinc finger protein 627                                               | ZNF627  | 716820    |
| Zinc finger protein 638                                               | ZNF638  | 704418    |
| Zinc finger protein 646                                               | ZNF646  | 712774    |
| Zinc finger protein 653                                               | ZNF653  | 714754    |
| Zinc finger protein 658                                               | ZNF658  | 100425456 |
| Zinc finger protein 664                                               | ZNF664  | 710703    |
| Zinc finger protein 687                                               | ZNF687  | 716590    |
| Zinc finger protein 7                                                 | ZNF7    | 715735    |
| Zinc finger protein 70                                                | ZNF70   | 698442    |
| Zinc finger protein 708                                               | ZNF708  | 693803    |
| Zinc finger protein 777                                               | ZNF777  | 711987    |
| Zinc finger protein 79                                                | ZNF79   | 700961    |
| Zinc finger protein 800                                               | ZNF800  | 697855    |
| Zinc finger protein 821                                               | ZNF821  | 707355    |
| Zinc finger protein 92                                                | ZNF92   | 708683    |
| Zinc ribbon domain containing 1                                       | ZNRD1   | 712151    |
| Zinc and ring finger 2, E3 ubiquitin protein ligase                   | ZNRF2   | 698413    |
| Zinc and ring finger 4                                                | ZNRF4   | 695996    |
| Zona pellucida glycoprotein 3 (sperm receptor)                        | ZP3     | 719925    |
| Zinc finger, RAN-binding domain containing 2                          | ZRANB2  | 703513    |
| Zinc finger (CCCH type), RNA binding motif and serine/arginine rich 2 | ZRSR2   | 720986    |
| Zinc finger and SCAN domain containing 2                              | ZSCAN2  | 695673    |
| Zinc finger and SCAN domain containing 29                             | ZSCAN29 | 710414    |
| Zinc finger and SCAN domain containing 32                             | ZSCAN32 | 702733    |
| Zinc finger with UFM1-specific peptidase domain                       | ZUFSP   | 718059    |
| Zinc finger, ZZ-type with EF-hand domain 1                            | ZZEF1   | 721518    |

---

**(4) Expressed in both groups 1c and 2c**

---

|                                                                                  |        |        |
|----------------------------------------------------------------------------------|--------|--------|
| 1-acylglycerol-3-phosphate O-acyltransferase 1                                   | AGPAT1 | 717174 |
| 1-acylglycerol-3-phosphate O-acyltransferase 3                                   | AGPAT3 | 713301 |
| 3-hydroxy-3-methylglutaryl-coa synthase 2 (mitochondrial)                        | HMGCS2 | 713541 |
| 5,10-methenyltetrahydrofolate synthetase (5-formyltetrahydrofolate cyclo-ligase) | MTHFS  | 717493 |
| 5-hydroxytryptamine (serotonin) receptor 5A, G protein-coupled                   | HTR5A  | 716134 |
| 5-phosphohydroxy-L-lysine phospho-lyase                                          | PHYKPL | 702302 |
| 8-oxoguanine DNA glycosylase                                                     | OGG1   | 700481 |

|                                                                             |          |           |
|-----------------------------------------------------------------------------|----------|-----------|
| Abhydrolase domain containing 8                                             | ABHD8    | 718980    |
| ABI family member 3                                                         | ABI3     | 698710    |
| Achaete-scute family bhlh transcription factor 4                            | ASCL4    | 704632    |
| Acid sensing ion channel subunit 3                                          | ASIC3    | 714396    |
| Acrosin binding protein                                                     | ACRBP    | 713219    |
| Actin like 7B                                                               | ACTL7B   | 710750    |
| Activating transcription factor 2                                           | ATF2     | 699072    |
| Activin A receptor type IB                                                  | ACVR1B   | 696587    |
| Activin A receptor type IL                                                  | ACVRL1   | 696471    |
| ADAM metallopeptidase domain 21                                             | ADAM21   | 715640    |
| ADAM metallopeptidase domain 29                                             | ADAM29   | 698113    |
| ADAM metallopeptidase with thrombospondin type 1 motif 14                   | ADAMTS14 | 710154    |
| ADAM metallopeptidase with thrombospondin type 1 motif 17                   | ADAMTS17 | 693447    |
| ADAMTS like 5                                                               | ADAMTSL5 | 721290    |
| Adaptor related protein complex 1 associated regulatory protein             | AP1AR    | 700734    |
| Adaptor related protein complex 3, beta 2 subunit                           | AP3B2    | 694091    |
| Adducin 2                                                                   | ADD2     | 702939    |
| Adenylate cyclase 4                                                         | ADCY4    | 714684    |
| Adhesion molecule with Ig-like domain 2                                     | AMIGO2   | 705386    |
| Adipogenesis associated, Mth938 domain containing                           | AAMDC    | 699328    |
| Adipogenesis regulatory factor                                              | ADIRF    | 699173    |
| ADP ribosylation factor like gtpase 10                                      | ARL10    | 696524    |
| ADP ribosylation factor like gtpase 6                                       | ARL6     | 696616    |
| A-kinase anchoring protein 12                                               | AKAP12   | 641446    |
| A-kinase anchoring protein 2                                                | AKAP2    | 709841    |
| A-kinase anchoring protein 7                                                | AKAP7    | 710509    |
| Aladin WD repeat nucleoporin                                                | AAAS     | 719095    |
| Alanine-glyoxylate aminotransferase                                         | AGXT     | 699941    |
| Alanine--glyoxylate aminotransferase 2                                      | AGXT2    | 699250    |
| Alkb homolog 2, alpha-ketoglutarate-dependent dioxygenase                   | ALKBH2   | 706708    |
| Alkb homolog 4, lysine demethylase                                          | ALKBH4   | 715078    |
| Alpha hemoglobin stabilizing protein                                        | AHSP     | 714392    |
| Alpha-defensin 1A                                                           | MNP1A    | 574196    |
| Aminoacylase 3                                                              | ACY3     | 711083    |
| Aminoadipate-semialdehyde dehydrogenase-phospho<br>pantetheinyl transferase | AASDHPPT | 100328984 |
| Aminoadipate-semialdehyde synthase                                          | AASS     | 694594    |
| Amyloid beta (A4) precursor-like protein 2                                  | APLP2    | 718819    |
| Anaphase promoting complex subunit 2                                        | ANAPC2   | 706384    |
| Ancient ubiquitous protein 1                                                | AUP1     | 710020    |
| Angio associated migratory cell protein                                     | AAMP     | 700763    |
| Angiopoietin like 2                                                         | ANGPTL2  | 701444    |
| Ankyrin 2, neuronal                                                         | ANK2     | 702180    |
| Ankyrin repeat and IBR domain containing 1                                  | ANKIB1   | 703273    |
| Ankyrin repeat and SOCS box containing 3                                    | ASB3     | 716503    |
| Ankyrin repeat domain 13C                                                   | ANKRD13C | 702811    |
| Ankyrin repeat domain 2 (stretch responsive muscle)                         | ANKRD2   | 707097    |
| Ankyrin repeat domain 49                                                    | ANKRD49  | 697693    |

|                                                                                    |          |           |
|------------------------------------------------------------------------------------|----------|-----------|
| Ankyrin repeat domain 6                                                            | ANKRD6   | 701339    |
| Annexin A9                                                                         | ANXA9    | 708704    |
| Anoctamin 4                                                                        | ANO4     | 695973    |
| Anti-silencing function 1A histone chaperone                                       | ASF1A    | 714761    |
| Apelin receptor                                                                    | APLNR    | 706823    |
| Apolipoprotein A-II                                                                | APOA2    | 719946    |
| Apolipoprotein A-V                                                                 | APOA5    | 696484    |
| Apolipoprotein B mRNA editing enzyme, catalytic polypeptide-like 3H                | APOBEC3H | 723811    |
| Apolipoprotein L2                                                                  | APOL2    | 694029    |
| Apoptosis inducing factor, mitochondria associated 1                               | AIFM1    | 702773    |
| Aprataxin                                                                          | APTIX    | 702671    |
| Aquaporin 11                                                                       | AQP11    | 698835    |
| ARFGEF family member 3                                                             | ARFGEF3  | 703791    |
| Arginine/serine-rich coiled-coil 2                                                 | RSRC2    | 706564    |
| ARP3 actin-related protein 3 homolog B (yeast)                                     | ACTR3B   | 715965    |
| Artemin                                                                            | ARTN     | 701641    |
| Aspartate beta-hydroxylase domain containing 1                                     | ASPHD1   | 707467    |
| Aspartate dehydrogenase domain containing                                          | ASPDH    | 719609    |
| Aspartoacylase                                                                     | ASPA     | 706170    |
| Ataxin 2-like                                                                      | ATXN2L   | 708359    |
| ATP binding cassette subfamily B member 6 (Langereis blood group)                  | ABCB6    | 704599    |
| ATP binding cassette subfamily C member 9                                          | ABCC9    | 654489    |
| ATP binding cassette subfamily D member 1                                          | ABCD1    | 696794    |
| ATP synthase F0 subunit 6                                                          | ATP6     | 2846629   |
| ATP synthase mitochondrial F1 complex assembly factor 2                            | ATPAF2   | 699709    |
| ATP synthase, H <sup>+</sup> transporting, mitochondrial F1 complex, delta subunit | ATP5D    | 705944    |
| ATPase, Ca <sup>++</sup> transporting, ubiquitous                                  | ATP2A3   | 707768    |
| ATPase, class II, type 9A                                                          | ATP9A    | 710250    |
| ATPase, H <sup>+</sup> transporting, lysosomal 14kda, V1 subunit F                 | ATP6V1F  | 702112    |
| ATPase, H <sup>+</sup> transporting, lysosomal 21kda, V0 subunit b                 | ATP6V0B  | 702243    |
| ATPase, H <sup>+</sup> /K <sup>+</sup> exchanging, alpha polypeptide               | ATP4A    | 100426216 |
| AT-rich interaction domain 2                                                       | ARID2    | 703823    |
| Aurora kinase A interacting protein 1                                              | AURKAIP1 | 706329    |
| Aurora kinase C                                                                    | AURKC    | 709801    |
| Autophagy related 2A                                                               | ATG2A    | 717290    |
| Autophagy related 4C, cysteine peptidase                                           | ATG4C    | 695606    |
| Autophagy related 7                                                                | ATG7     | 696238    |
| B9 protein domain 2                                                                | B9D2     | 704873    |
| Bardet-Biedl syndrome 12                                                           | BBS12    | 710538    |
| BARX homeobox 2                                                                    | BARX2    | 715001    |
| Basonuclin 2                                                                       | BNC2     | 713291    |
| B-cell receptor-associated protein 31                                              | BCAP31   | 696663    |
| BCL2/adenovirus E1B 19kda interacting protein 2                                    | BNIP2    | 703234    |
| BCL2-associated X protein                                                          | BAX      | 718948    |
| BCL6 corepressor                                                                   | BCOR     | 698644    |

|                                                                        |          |           |
|------------------------------------------------------------------------|----------|-----------|
| BCS1-like ( <i>S. Cerevisiae</i> )                                     | BCS1L    | 699690    |
| Beclin 1, autophagy related                                            | BECN1    | 711649    |
| BEN domain containing 5                                                | BEND5    | 711150    |
| Beta-1,3-galactosyltransferase 2                                       | B3GALT2  | 712334    |
| Beta-1,3-galactosyltransferase 4                                       | B3GALT4  | 718178    |
| Beta-1,3-glucuronyltransferase 3                                       | B3GAT3   | 718744    |
| Beta-1,4-glucuronyltransferase 1                                       | B4GAT1   | 714270    |
| Beta-1,4-N-acetyl-galactosaminyl transferase 3                         | B4GALNT3 | 706259    |
| Beta-2-microglobulin                                                   | B2M      | 712428    |
| Beta-carotene oxygenase 2                                              | BCO2     | 712095    |
| Bloom syndrome, recq helicase-like                                     | BLM      | 703460    |
| Bone morphogenetic protein 1                                           | BMP1     | 707596    |
| BPI fold containing family A member 2                                  | BPIFA2   | 710376    |
| Brain and reproductive organ-expressed (TNFRSF1A modulator)            | BRE      | 702365    |
| Bromodomain adjacent to zinc finger domain 1B                          | BAZ1B    | 716436    |
| Bromodomain containing 2                                               | BRD2     | 717893    |
| Bruton agammaglobulinemia tyrosine kinase                              | BTK      | 703000    |
| BUB3 mitotic checkpoint protein                                        | BUB3     | 708033    |
| Cadherin 11, type 2, OB-cadherin (osteoblast)                          | CDH11    | 708826    |
| Cadherin 8, type 2                                                     | CDH8     | 708408    |
| Cadherin related family member 2                                       | CDHR2    | 697249    |
| Calbindin                                                              | CALB1    | 677721    |
| Calcitonin-related polypeptide alpha                                   | CALCA    | 700649    |
| Calcium and integrin binding family member 2                           | CIB2     | 709429    |
| Calcium binding protein 4                                              | CABP4    | 711973    |
| Calcium/calmodulin-dependent protein kinase I                          | CAMK1    | 700212    |
| Calcium/calmodulin-dependent protein kinase II delta                   | CAMK2D   | 702504    |
| Calcium/calmodulin-dependent protein kinase kinase 1, alpha            | CAMKK1   | 707562    |
| Caldesmon 1                                                            | CALD1    | 707050    |
| Calmodulin like 3                                                      | CALML3   | 722513    |
| Calpain 2, (m/II) large subunit                                        | CAPN2    | 703047    |
| Calponin 1, basic, smooth muscle                                       | CNN1     | 716681    |
| Calponin 3, acidic                                                     | CNN3     | 709538    |
| Calreticulin                                                           | CALR     | 716910    |
| Camp responsive element modulator                                      | CREM     | 698636    |
| Capping protein (actin filament), gelsolin-like                        | CAPG     | 695288    |
| Carbohydrate (chondroitin 4) sulfotransferase 13                       | CHST13   | 716548    |
| Carbohydrate (keratan sulfate Gal-6) sulfotransferase 1                | CHST1    | 715176    |
| Carbohydrate (N-acetylgalactosamine 4-sulfate 6-O) sulfotransferase 15 | CHST15   | 693845    |
| Carbohydrate (N-acetylglucosamine 6-O) sulfotransferase 7              | CHST7    | 704906    |
| Carbohydrate sulfotransferase 8                                        | CHST8    | 106992408 |
| Carbonic anhydrase VB, mitochondrial                                   | CA5B     | 713128    |
| Carbonic anhydrase VII                                                 | CA7      | 696681    |
| Carbonic anhydrase XIV                                                 | CA14     | 706360    |
| Carboxypeptidase A1                                                    | CPA1     | 703095    |
| Carboxypeptidase A5                                                    | CPA5     | 702974    |
| Carboxypeptidase N subunit 2                                           | CPN2     | 106997192 |



|                                                       |          |           |
|-------------------------------------------------------|----------|-----------|
| Carboxypeptidase X (M14 family), member 1             | CPXM1    | 716790    |
| Cardiotrophin 1                                       | CTF1     | 713850    |
| Carnitine palmitoyltransferase 1A (liver)             | CPT1A    | 709837    |
| Carnosine dipeptidase 1 (metallopeptidase M20 family) | CNDP1    | 695195    |
| Cartilage acidic protein 1                            | CRTAC1   | 707486    |
| Casein kinase 2, beta polypeptide                     | CSNK2B   | 715807    |
| Caspase 8 associated protein 2                        | CASP8AP2 | 702294    |
| Caspase activity and apoptosis inhibitor 1            | CAAP1    | 707992    |
| Catalase                                              | CAT      | 717406    |
| Cathepsin C                                           | CTSC     | 705320    |
| Cathepsin G                                           | CTSG     | 716440    |
| Cation channel, sperm associated 2                    | CATSPER2 | 710876    |
| Caudal type homeobox 4                                | CDX4     | 701374    |
| Cbl proto-oncogene B, E3 ubiquitin protein ligase     | CBLB     | 703879    |
| CCR4-NOT transcription complex subunit 1              | CNOT1    | 712880    |
| CD19 molecule                                         | CD19     | 705211    |
| CD1c molecule                                         | CD1C     | 717148    |
| CD27 molecule                                         | CD27     | 712693    |
| CD274 molecule                                        | CD274    | 716043    |
| CD300 molecule like family member f                   | CD300LF  | 703830    |
| CD4 molecule                                          | CD4      | 713807    |
| CD40 ligand                                           | CD40LG   | 574160    |
| CD63 molecule                                         | CD63     | 709828    |
| CD7 molecule                                          | CD7      | 719501    |
| CD8b molecule                                         | CD8B     | 699409    |
| CD99 molecule like 2                                  | CD99L2   | 708996    |
| Cell death-inducing DFFA-like effector b              | CIDEB    | 100425328 |
| Cell division cycle 23                                | CDC23    | 714000    |
| Cell division cycle 6                                 | CDC6     | 700081    |
| Cell growth regulator with ring finger domain 1       | CGRRF1   | 695231    |
| Centromere protein J                                  | CENPJ    | 721498    |
| Centrosomal protein 41kda                             | CEP41    | 703215    |
| Centrosomal protein 57kda-like 1                      | CEP57L1  | 700109    |
| Ceramide synthase 5                                   | CERS5    | 713449    |
| Cerebellar degeneration-related protein 2-like        | CDR2L    | 700082    |
| Cerebellin 2 precursor                                | CBLN2    | 694193    |
| Chaperonin containing TCP1, subunit 5 (epsilon)       | CCT5     | 696640    |
| Chemokine (C-C motif) ligand 19                       | CCL19    | 574386    |
| Chemokine (C-C motif) ligand 25                       | CCL25    | 574219    |
| Chemokine-like factor                                 | CKLF     | 693673    |
| Chimerin 2                                            | CHN2     | 697231    |
| Chitinase domain containing 1                         | CHID1    | 701435    |
| Chloride intracellular channel 3                      | CLIC3    | 721634    |
| Cholinergic receptor, muscarinic 4                    | CHRM4    | 574195    |
| Cholinergic receptor, nicotinic alpha 10              | CHRNA10  | 718133    |
| Cholinergic receptor, nicotinic alpha 7               | CHRNA7   | 574230    |
| Cholinergic receptor, nicotinic beta 2                | CHRNB2   | 716830    |
| Cholinergic receptor, nicotinic gamma                 | CHRNG    | 713418    |

|                                                         |             |           |
|---------------------------------------------------------|-------------|-----------|
| Chondroitin sulfate N-acetylgalactosaminyltransferase 1 | CSGALNACT1  | 704901    |
| Chromodomain helicase DNA binding protein 3             | CHD3        | 716508    |
| Chromogranin A                                          | CHGA        | 574388    |
| Chromogranin B                                          | CHGB        | 719171    |
| Chromosome 1 open reading frame, human c1orf198         | C1H1orf198  | 714084    |
| Chromosome 1 open reading frame, human c1orf54          | C1H1orf54   | 107000832 |
| Chromosome 10 open reading frame, human c20orf27        | C10H20orf27 | 717525    |
| Chromosome 13 open reading frame, human c2orf73         | C13H2orf73  | 718692    |
| Chromosome 14 open reading frame, human c11orf53        | C14H11orf53 | 710705    |
| Chromosome 14 open reading frame, human c11orf68        | C14H11orf68 | 715318    |
| Chromosome 16 open reading frame, human c17orf49        | C16H17orf49 | 713820    |
| Chromosome 16 open reading frame, human c17orf74        | C16H17orf74 | 721838    |
| Chromosome 16 open reading frame, human c17orf75        | C16H17orf75 | 714040    |
| Chromosome 2 open reading frame, human c3orf18          | C2H3orf18   | 701675    |
| Chromosome 2 open reading frame, human c3orf67          | C2H3orf67   | 705402    |
| Chromosome 20 open reading frame, human c16orf13        | C20H16orf13 | 696495    |
| Chromosome 20 open reading frame, human c16orf46        | C20H16orf46 | 713832    |
| Chromosome 20 open reading frame, human c16orf54        | C20H16orf54 | 706285    |
| Chromosome 20 open reading frame, human c16orf62        | C20H16orf62 | 695027    |
| Chromosome 20 open reading frame, human c16orf78        | C20H16orf78 | 693672    |
| Chromosome 20 open reading frame, human c16orf82        | C20H16orf82 | 702965    |
| Chromosome 3 open reading frame, human c21orf62         | C3H21orf62  | 700356    |
| Chromosome 3 open reading frame, human c21orf91         | C3H21orf91  | 710406    |
| Chromosome 3 open reading frame, human c7orf60          | C3H7orf60   | 704714    |
| Chromosome 4 open reading frame, human c6orf15          | C4H6orf15   | 100141392 |
| Chromosome 6 open reading frame, human c5orf22          | C6H5orf22   | 695901    |
| Chromosome 7 open reading frame, human c14orf166        | C7H14orf166 | 710094    |
| Chromosome 7 open reading frame, human c14orf37         | C7H14orf37  | 699880    |
| Chromosome 8 open reading frame, human c8orf59          | C8H8orf59   | 703464    |
| Chromosome 9 open reading frame, human c10orf62         | C9H10orf62  | 706769    |
| Chromosome 9 open reading frame, human c10orf82         | C9H10orf82  | 707098    |
| Chromosome 9 open reading frame, human c10orf90         | C9H10orf90  | 696655    |
| Chromosome X open reading frame, human cxorf40a         | CXHXorf40A  | 702659    |
| Chymotrypsin-like                                       | CTRL        | 701625    |
| Cilia and flagella associated protein 65                | CFAP65      | 701296    |
| Ciliary neurotrophic factor                             | CNTF        | 701907    |
| Claudin 9                                               | CLDN9       | 699721    |
| Cleavage and polyadenylation specific factor 4          | CPSF4       | 708119    |
| Cleft lip and palate associated transmembrane protein 1 | CLPTM1      | 718306    |
| Coagulation factor IX                                   | F9          | 695578    |
| Coatomer protein complex subunit epsilon                | COPE        | 719631    |
| Codanin 1                                               | CDAN1       | 708838    |
| Cofilin 1 (non-muscle)                                  | CFL1        | 721882    |
| Cofilin 2 (muscle)                                      | CFL2        | 693875    |
| Coiled-coil domain containing 142                       | CCDC142     | 709014    |
| Coiled-coil domain containing 178                       | CCDC178     | 707566    |
| Coiled-coil domain containing 22                        | CCDC22      | 713063    |
| Coiled-coil domain containing 27                        | CCDC27      | 695384    |

|                                                                       |         |        |
|-----------------------------------------------------------------------|---------|--------|
| Coiled-coil domain containing 3                                       | CCDC3   | 694884 |
| Coiled-coil domain containing 82                                      | CCDC82  | 700198 |
| Coiled-coil domain containing 86                                      | CCDC86  | 695978 |
| Coiled-coil domain containing 92                                      | CCDC92  | 705922 |
| Coiled-coil serine rich protein 2                                     | CCSER2  | 698006 |
| Coiled-coil-helix-coiled-coil-helix domain containing 10              | CHCHD10 | 720205 |
| Coiled-coil-helix-coiled-coil-helix domain containing 2               | CHCHD2  | 702967 |
| Coiled-coil-helix-coiled-coil-helix domain containing 8               | CHCHD8  | 718275 |
| Collagen, type III, alpha 1                                           | COL3A1  | 574131 |
| Collagen, type VI, alpha 3                                            | COL6A3  | 694701 |
| Collagen, type XII, alpha 1                                           | COL12A1 | 717820 |
| Collagen, type XXI, alpha 1                                           | COL21A1 | 712070 |
| COMM domain containing 2                                              | COMMD2  | 711498 |
| Complement component 1, q subcomponent-like 1                         | C1QL1   | 715801 |
| Complement component 4 binding protein, beta                          | C4BPB   | 693636 |
| Complement component 5a receptor 1                                    | C5AR1   | 718056 |
| Complement factor properdin                                           | CFP     | 707386 |
| Contactin 1                                                           | CNTN1   | 574365 |
| Coordinator of PRMT5, differentiation stimulator                      | COPRS   | 713293 |
| COP9 signalosome subunit 4                                            | COPS4   | 693435 |
| Copine III                                                            | CPNE3   | 694013 |
| Core-binding factor, runt domain, alpha subunit 2; translocated to, 3 | CBFA2T3 | 698233 |
| Cornichon family AMPA receptor auxiliary protein 1                    | CNIH1   | 695002 |
| Coronin, actin binding protein, 1B                                    | CORO1B  | 721725 |
| Cortexin 1                                                            | CTXN1   | 706069 |
| COX19 cytochrome c oxidase assembly homolog (S. Cerevisiae)           | COX19   | 696368 |
| Creatine kinase, mitochondrial 2                                      | CKMT2   | 711434 |
| Crumbs family member 3                                                | CRB3    | 700086 |
| Cryptochrome circadian clock 2                                        | CRY2    | 715000 |
| Crystallin beta B3                                                    | CRYBB3  | 711554 |
| C-src tyrosine kinase                                                 | CSK     | 702868 |
| C-type lectin domain family 4 member A                                | CLEC4A  | 716122 |
| C-type lectin domain family 9 member A                                | CLEC9A  | 717472 |
| CUE domain containing 2                                               | CUEDC2  | 713243 |
| CUGBP, Elav-like family member 3                                      | CELF3   | 716884 |
| Cyclic nucleotide binding domain containing 2                         | CNBD2   | 703290 |
| Cyclin and CBS domain divalent metal cation transport mediator 2      | CNNM2   | 714238 |
| Cyclin D binding myb-like transcription factor 1                      | DMTF1   | 706292 |
| Cyclin D3                                                             | CCND3   | 695215 |
| Cyclin T1                                                             | CCNT1   | 707754 |
| Cyclin-dependent kinase 14                                            | CDK14   | 703442 |
| Cyclin-dependent kinase 17                                            | CDK17   | 717183 |
| Cyclin-dependent kinase 2 interacting protein                         | CINP    | 709044 |
| Cyclin-dependent kinase 4                                             | CDK4    | 715650 |
| Cystatin C                                                            | CST3    | 574313 |
| Cysteine conjugate-beta lyase, cytoplasmic                            | CCBL1   | 717142 |
| Cytochrome c oxidase subunit via polypeptide 2                        | COX6A2  | 713995 |

|                                                                          |          |        |
|--------------------------------------------------------------------------|----------|--------|
| Cytochrome c oxidase subunit viia polypeptide 2 like                     | COX7A2L  | 712764 |
| Cytochrome P450, family 2, subfamily D, polypeptide 6                    | CYP2D6   | 678691 |
| Cytochrome P450, family 2, subfamily F, polypeptide 6                    | CYP2F1   | 678696 |
| Cytochrome P450, family 21, subfamily A, polypeptide 2                   | CYP21A2  | 717020 |
| Cytochrome P450c17                                                       | CYP17A1  | 678693 |
| Cytoplasmic polyadenylation element binding protein 1                    | CPEB1    | 694357 |
| Cytoplasmic polyadenylation element binding protein 2                    | CPEB2    | 722844 |
| Cytosolic thiouridylase subunit 1                                        | CTU1     | 719536 |
| Cytotoxic and regulatory T-cell molecule                                 | CRTAM    | 707560 |
| Dachshund family transcription factor 1                                  | DACH1    | 693532 |
| Dachsous cadherin-related 1                                              | DCHS1    | 711938 |
| DAZ associated protein 2                                                 | DAZAP2   | 695282 |
| DC-STAMP domain containing 2                                             | DCST2    | 717224 |
| DDB1 and CUL4 associated factor 11                                       | DCAF11   | 714867 |
| DEAD (Asp-Glu-Ala-Asp) box helicase 42                                   | DDX42    | 717964 |
| DEAD (Asp-Glu-Ala-Asp) box polypeptide 41                                | DDX41    | 700742 |
| DEAD (Asp-Glu-Ala-Asp) box polypeptide 50                                | DDX50    | 712511 |
| DEAD (Asp-Glu-Ala-Asp) box polypeptide 54                                | DDX54    | 712763 |
| Deafness, autosomal recessive 31                                         | DFNB31   | 708051 |
| DEAH (Asp-Glu-Ala-His) box polypeptide 38                                | DHX38    | 709173 |
| DEAH (Asp-Glu-Ala-His) box polypeptide 40                                | DHX40    | 715202 |
| Decapping exoribonuclease                                                | DXO      | 716027 |
| Dedicator of cytokinesis 2                                               | DOCK2    | 704061 |
| Dedicator of cytokinesis 5                                               | DOCK5    | 711359 |
| Defensin beta 108B                                                       | DEFB108B | 696933 |
| Defensin beta 118                                                        | DEFB118  | 641438 |
| Dehydrogenase/reductase (SDR family) member 13                           | DHRS13   | 710755 |
| Dehydrogenase/reductase (SDR family) member 3                            | DHRS3    | 715548 |
| Delta-like 4 (Drosophila)                                                | DLL4     | 704898 |
| Denticleless E3 ubiquitin protein ligase homolog (Drosophila)            | DTL      | 711236 |
| Deoxyhypusine synthase                                                   | DHPS     | 716213 |
| Deoxyribonuclease I                                                      | DNASE1   | 704119 |
| Deoxyribonuclease I-like 3                                               | DNASE1L3 | 702613 |
| Dickkopf-like 1                                                          | DKKL1    | 718731 |
| Dipeptidase 3                                                            | DPEP3    | 701327 |
| Discoidin domain receptor tyrosine kinase 2                              | DDR2     | 720124 |
| DNA cross-link repair 1B                                                 | DCLRE1B  | 707742 |
| Dnaj heat shock protein family (Hsp40) member B2                         | DNAJB2   | 702936 |
| Dnaj heat shock protein family (Hsp40) member C15                        | DNAJC15  | 700339 |
| Dnaj heat shock protein family (Hsp40) member C22                        | DNAJC22  | 710205 |
| Dnaj heat shock protein family (Hsp40) member C27                        | DNAJC27  | 694037 |
| Dnaj heat shock protein family (Hsp40) member C3                         | DNAJC3   | 695757 |
| Dnaj heat shock protein family (Hsp40) member C5 beta                    | DNAJC5B  | 702408 |
| Docking protein 5                                                        | DOK5     | 698689 |
| Dolichyl-phosphate mannosyltransferase polypeptide 2, regulatory subunit | DPM2     | 698709 |
| Dolichyl-phosphate mannosyltransferase polypeptide 3                     | DPM3     | 717446 |
| DR1-associated protein 1 (negative cofactor 2 alpha)                     | DRAP1    | 715271 |

|                                                      |         |        |
|------------------------------------------------------|---------|--------|
| Drosha, ribonuclease type III                        | DROSHA  | 692081 |
| DTW domain containing 1                              | DTWD1   | 715084 |
| Dual specificity phosphatase 16                      | DUSP16  | 696332 |
| Dual specificity phosphatase 26 (putative)           | DUSP26  | 697134 |
| Dynactin subunit 6                                   | DCTN6   | 694273 |
| Dyskeratosis congenita 1, dyskerin                   | DKC1    | 702563 |
| E1A binding protein p300                             | EP300   | 706258 |
| E74-like factor 2 (ets domain transcription factor)  | ELF2    | 696760 |
| E74-like factor 5 (ets domain transcription factor)  | ELF5    | 717377 |
| Early growth response 1                              | EGR1    | 716786 |
| Ecotropic viral integration site 5-like              | EVI5L   | 706628 |
| Ectodysplasin A receptor                             | EDAR    | 695059 |
| Ectonucleoside triphosphate diphosphohydrolase 8     | ENTPD8  | 704424 |
| Ectonucleotide pyrophosphatase/phosphodiesterase 1   | ENPP1   | 710140 |
| Ectonucleotide pyrophosphatase/phosphodiesterase 3   | ENPP3   | 710232 |
| EF-hand calcium binding domain 7                     | EFCAB7  | 696830 |
| EF-hand domain family member D2                      | EFHD2   | 694155 |
| EGF-like, fibronectin type III and laminin G domains | EGFLAM  | 693314 |
| EGF-like-domain, multiple 7                          | EGFL7   | 709840 |
| EGF-like-domain, multiple 8                          | EGFL8   | 717145 |
| Egl-9 family hypoxia-inducible factor 2              | EGLN2   | 703083 |
| EH domain containing 1                               | EHD1    | 722036 |
| EH domain containing 4                               | EHD4    | 707376 |
| Elastin microfibril interfacer 3                     | EMILIN3 | 696465 |
| ELK4, ETS-domain protein (SRF accessory protein 1)   | ELK4    | 699281 |
| ELMO/CED-12 domain containing 3                      | ELMOD3  | 695180 |
| ELOVL fatty acid elongase 4                          | ELOVL4  | 692070 |
| Embigin                                              | EMB     | 702068 |
| Endonuclease domain containing 1                     | ENDOD1  | 699210 |
| Endothelial cell adhesion molecule                   | ESAM    | 712200 |
| Endothelin receptor type B                           | EDNRB   | 697329 |
| Enhancer of rudimentary homolog (Drosophila)         | ERH     | 712507 |
| Enhancer of yellow 2 homolog (Drosophila)            | ENY2    | 699048 |
| Enolase 1, (alpha)                                   | ENO1    | 709378 |
| Eomesodermin                                         | EOMES   | 704711 |
| EP300 interacting inhibitor of differentiation 3     | EID3    | 701175 |
| EPH receptor B4                                      | EPHB4   | 719320 |
| EPH receptor B6                                      | EPHB6   | 704886 |
| Ephrin-A3                                            | EFNA3   | 717373 |
| Epidermal growth factor receptor                     | EGFR    | 613027 |
| Epoxide hydrolase 1, microsomal (xenobiotic)         | EPHX1   | 700180 |
| ER degradation enhancer, mannosidase alpha-like 3    | EDEM3   | 714475 |
| ER lipid raft associated 2                           | ERLIN2  | 698126 |
| ER membrane protein complex subunit 10               | EMC10   | 719285 |
| ErbB2 interacting protein                            | ERBB2IP | 700429 |
| ERGIC and golgi 3                                    | ERGIC3  | 704736 |
| Ethanolamine-phosphate phospho-lyase                 | ETNPPL  | 696880 |
| Eukaryotic translation elongation factor 1 beta 2    | EEF1B2  | 707019 |

|                                                                     |           |        |
|---------------------------------------------------------------------|-----------|--------|
| Eukaryotic translation elongation factor 1 gamma                    | EEF1G     | 722274 |
| Eukaryotic translation initiation factor 2B subunit gamma           | EIF2B3    | 705862 |
| Eukaryotic translation initiation factor 3 subunit E                | EIF3E     | 697622 |
| Eukaryotic translation initiation factor 3 subunit I                | EIF3I     | 708145 |
| Eukaryotic translation initiation factor 3 subunit L                | EIF3L     | 699189 |
| Eukaryotic translation initiation factor 4E nuclear import factor 1 | EIF4ENIF1 | 716871 |
| Eukaryotic translation initiation factor 4H                         | EIF4H     | 693429 |
| Eva-1 homolog B (C. Elegans)                                        | EVA1B     | 713159 |
| Even-skipped homeobox 1                                             | EVX1      | 699106 |
| EWS RNA binding protein 1                                           | EWSR1     | 714432 |
| Exocyst complex component 2                                         | EXOC2     | 706296 |
| Exosome component 3                                                 | EXOSC3    | 716347 |
| Exosome component 8                                                 | EXOSC8    | 695071 |
| Exostosin glycosyltransferase 1                                     | EXT1      | 701488 |
| Exportin 6                                                          | XPO6      | 704332 |
| EYA transcriptional coactivator and phosphatase 2                   | EYA2      | 716182 |
| Family with sequence similarity 110 member B                        | FAM110B   | 703840 |
| Family with sequence similarity 126 member A                        | FAM126A   | 705467 |
| Family with sequence similarity 13 member C                         | FAM13C    | 702439 |
| Family with sequence similarity 151 member A                        | FAM151A   | 715361 |
| Family with sequence similarity 166 member A                        | FAM166A   | 705446 |
| Family with sequence similarity 171 member B                        | FAM171B   | 712442 |
| Family with sequence similarity 178 member B                        | FAM178B   | 710890 |
| Family with sequence similarity 181 member B                        | FAM181B   | 701184 |
| Family with sequence similarity 187, member B                       | FAM187B   | 707890 |
| Family with sequence similarity 206 member A                        | FAM206A   | 710486 |
| Family with sequence similarity 43 member B                         | FAM43B    | 705659 |
| Family with sequence similarity 57 member B                         | FAM57B    | 708210 |
| Family with sequence similarity 65 member B                         | FAM65B    | 715354 |
| Family with sequence similarity 71 member D                         | FAM71D    | 713472 |
| Fanconi anemia complementation group B                              | FANCB     | 712083 |
| Fanconi anemia complementation group I                              | FANCI     | 699878 |
| Fas ligand (TNF superfamily, member 6)                              | FASLG     | 574159 |
| Fascin actin-bundling protein 2, retinal                            | FSCN2     | 713824 |
| Fascin actin-bundling protein 3                                     | FSCN3     | 698236 |
| FAST kinase domains 1                                               | FASTKD1   | 706154 |
| Fat storage-inducing transmembrane protein 1                        | FITM1     | 715085 |
| Fatty acid binding protein 7, brain                                 | FABP7     | 713762 |
| FBJ murine osteosarcoma viral oncogene homolog                      | FOS       | 702077 |
| F-box and leucine-rich repeat protein 6                             | FBXL6     | 701594 |
| F-box protein 39                                                    | FBXO39    | 713494 |
| F-box protein 44                                                    | FBXO44    | 714585 |
| F-box protein 7                                                     | FBXO7     | 717317 |
| Feline leukemia virus subgroup C cellular receptor 1                | FLVCR1    | 710008 |
| Fem-1 homolog b (C. Elegans)                                        | FEM1B     | 693955 |
| Fermitin family member 3                                            | FERMT3    | 722120 |
| Ferritin mitochondrial                                              | FTMT      | 699743 |
| Fetal and adult testis expressed 1                                  | FATE1     | 704368 |

|                                                        |         |        |
|--------------------------------------------------------|---------|--------|
| FEV (ETS oncogene family)                              | FEV     | 701065 |
| FGR proto-oncogene, Src family tyrosine kinase         | FGR     | 716296 |
| Fibrinogen-like 2                                      | FGL2    | 694856 |
| Fibroblast growth factor 16                            | FGF16   | 705612 |
| Fibroblast growth factor 17                            | FGF17   | 706659 |
| Fibroblast growth factor receptor 1                    | FGFR1   | 700126 |
| Fibroblast growth factor receptor substrate 3          | FRS3    | 694462 |
| Fibronectin 1                                          | FN1     | 613269 |
| Fibulin 5                                              | FBLN5   | 697372 |
| Ficolin 2                                              | FCN2    | 712486 |
| Filamin binding LIM protein 1                          | FBLIM1  | 695727 |
| Fizzy/cell division cycle 20 related 1                 | FZR1    | 721711 |
| FK506 binding protein 7                                | FKBP7   | 703299 |
| FK506 binding protein 8                                | FKBP8   | 720232 |
| Flavin containing monooxygenase 1                      | FMO1    | 703743 |
| FLYWCH-type zinc finger 1                              | FLYWCH1 | 700909 |
| Follicle stimulating hormone, beta polypeptide         | FSHB    | 697317 |
| Follistatin like 1                                     | FSTL1   | 713367 |
| Forkhead box C2                                        | FOXC2   | 694852 |
| Forty-two-three domain containing 1                    | FYTTD1  | 714705 |
| Four and a half LIM domains 3                          | FHL3    | 715313 |
| Frataxin                                               | FXN     | 699469 |
| Free fatty acid receptor 4                             | FFAR4   | 700014 |
| Frizzled class receptor 10                             | FZD10   | 717812 |
| Frizzled-related protein                               | FRZB    | 706048 |
| Fucosyltransferase 10 (alpha (1,3) fucosyltransferase) | FUT10   | 697659 |
| Fuzzy planar cell polarity protein                     | FUZ     | 719442 |
| FXYP domain containing ion transport regulator 7       | FXYP7   | 718457 |
| FYN proto-oncogene, Src family tyrosine kinase         | FYN     | 574214 |
| FYVE, rhogef and PH domain containing 2                | FGD2    | 719329 |
| FYVE, rhogef and PH domain containing 6                | FGD6    | 712132 |
| G protein pathway suppressor 1                         | GPS1    | 719343 |
| G protein-coupled bile acid receptor 1                 | GPBAR1  | 697937 |
| G protein-coupled receptor 101                         | GPR101  | 694636 |
| G protein-coupled receptor 135                         | GPR135  | 701843 |
| G protein-coupled receptor 151                         | GPR151  | 708020 |
| G protein-coupled receptor 157                         | GPR157  | 722176 |
| G protein-coupled receptor 171                         | GPR171  | 709960 |
| G protein-coupled receptor 18                          | GPR18   | 698714 |
| G protein-coupled receptor 183                         | GPR183  | 698844 |
| G protein-coupled receptor 31                          | GPR31   | 717158 |
| G protein-coupled receptor 63                          | GPR63   | 704888 |
| G protein-coupled receptor 65                          | GPR65   | 693449 |
| G protein-coupled receptor 68                          | GPR68   | 696529 |
| G protein-coupled receptor 82                          | GPR82   | 701014 |
| G protein-coupled receptor, class C, group 5, member D | GPRC5D  | 698898 |
| G2/M-phase specific E3 ubiquitin protein ligase        | G2E3    | 717021 |
| Galactose-3-O-sulfotransferase 3                       | GAL3ST3 | 714845 |

|                                                                       |         |           |
|-----------------------------------------------------------------------|---------|-----------|
| Gametogenetin                                                         | GGN     | 715072    |
| Gamma-aminobutyric acid (GABA) A receptor, beta 3                     | GABRB3  | 711754    |
| Gamma-glutamylcyclotransferase                                        | GGCT    | 695547    |
| Gamma-glutamyltransferase 5                                           | GGT5    | 720345    |
| Gap junction protein alpha 3                                          | GJA3    | 704432    |
| Gap junction protein delta 4                                          | GJD4    | 699010    |
| Gastric inhibitory polypeptide                                        | GIP     | 698335    |
| Gastrulation brain homeobox 2                                         | GBX2    | 693901    |
| GCN1, eif2 alpha kinase activator homolog                             | GCN1    | 698528    |
| General transcription factor IIH subunit 4                            | GTF2H4  | 714285    |
| General transcription factor IIH subunit 5                            | GTF2H5  | 700107    |
| Germ cell-less, spermatogenesis associated 1                          | GMCL1   | 701545    |
| Ghrelin/obestatin prepropeptide                                       | GHRL    | 574280    |
| GLE1, RNA export mediator                                             | GLE1    | 717474    |
| Glucokinase (hexokinase 4) regulator                                  | GCKR    | 701431    |
| Glucose-fructose oxidoreductase domain containing 1                   | GFOD1   | 700607    |
| Glucosidase, beta (bile acid) 2                                       | GBA2    | 696062    |
| Glutamate decarboxylase 1                                             | GAD1    | 613030    |
| Glutamate receptor, ionotropic, kainate 1                             | GRIK1   | 705699    |
| Glutaminyl-peptide cyclotransferase                                   | QPCT    | 712233    |
| Glutathione peroxidase 1                                              | GPX1    | 706732    |
| Glutathione peroxidase 6                                              | GPX6    | 100286832 |
| Glutathione peroxidase 8 (putative)                                   | GPX8    | 705965    |
| Glutathione S-transferase alpha 4                                     | GSTA4   | 709666    |
| Glutathione S-transferase kappa 1                                     | GSTK1   | 704240    |
| Glutathione S-transferase omega 2                                     | GSTO2   | 715291    |
| Glutathione S-transferase, C-terminal domain containing               | GSTCD   | 694220    |
| Glyceraldehyde-3-phosphate dehydrogenase, spermatogenic               | GAPDHS  | 709485    |
| Glycosyltransferase 6 domain containing 1                             | GLT6D1  | 711729    |
| Golgi brefeldin A resistant guanine nucleotide exchange factor 1      | GBF1    | 714579    |
| Golgi-associated, gamma adaptin ear containing, ARF binding protein 3 | GGA3    | 705751    |
| G-protein signaling modulator 1                                       | GPSM1   | 710652    |
| Granulysin                                                            | GNLY    | 696059    |
| Granzyme B                                                            | GZMB    | 716518    |
| GRB2-related adaptor protein                                          | GRAP    | 702473    |
| G-rich RNA sequence binding factor 1                                  | GRSF1   | 706301    |
| Group-specific component (vitamin D binding protein)                  | GC      | 705708    |
| Growth arrest and DNA damage inducible alpha                          | GADD45A | 701054    |
| Growth differentiation factor 2                                       | GDF2    | 711516    |
| Growth differentiation factor 7                                       | GDF7    | 702462    |
| Growth factor independent 1 transcription repressor                   | GFI1    | 706481    |
| Growth hormone inducible transmembrane protein                        | GHITM   | 702691    |
| Growth hormone secretagogue receptor                                  | GHSR    | 694587    |
| Gse1 coiled-coil protein                                              | GSE1    | 693298    |
| GTP binding protein 1                                                 | GTPBP1  | 701651    |
| Gtpase, IMAP family member 4                                          | GIMAP4  | 713506    |
| Guanidinoacetate N-methyltransferase                                  | GAMT    | 721263    |



|                                                                                                                  |          |           |
|------------------------------------------------------------------------------------------------------------------|----------|-----------|
| Guanine nucleotide binding protein (G protein), alpha inhibiting activity polypeptide 2                          | GNAI2    | 703780    |
| Guanine nucleotide binding protein (G protein), beta polypeptide 1                                               | GNB1     | 703399    |
| Guanine nucleotide binding protein (G protein), beta polypeptide 2-like 1                                        | GNB2L1   | 708526    |
| Guanine nucleotide binding protein-like 2 (nucleolar)                                                            | GNL2     | 713862    |
| Guanylate binding protein 2, interferon-inducible                                                                | GBP2     | 694684    |
| Guanylate cyclase 1, soluble, beta 3                                                                             | GUCY1B3  | 100424944 |
| Guanylate kinase 1                                                                                               | GUK1     | 695272    |
| H2A histone family, member Y2                                                                                    | H2AFY2   | 711117    |
| H2A histone family, member Z                                                                                     | H2AFZ    | 709326    |
| Haloacid dehalogenase like hydrolase domain containing 3                                                         | HDHD3    | 705447    |
| HAUS augmin like complex subunit 8                                                                               | HAUS8    | 718874    |
| HCLS1 associated protein X-1                                                                                     | HAX1     | 716495    |
| Heat shock factor binding protein 1                                                                              | HSBP1    | 714498    |
| Heat shock protein 90kda alpha family class B member 1                                                           | HSP90AB1 | 702293    |
| Heat shock protein family B (small) member 1                                                                     | HSPB1    | 715615    |
| Heat shock protein family B (small) member 11                                                                    | HSPB11   | 714791    |
| Heat shock protein family B (small) member 6                                                                     | HSPB6    | 710760    |
| Heat shock transcription factor 2                                                                                | HSF2     | 713938    |
| Helicase (DNA) B                                                                                                 | HELB     | 717860    |
| Hematopoietic cell-specific Lyn substrate 1                                                                      | HCLS1    | 714044    |
| Hematopoietic prostaglandin D synthase                                                                           | HPGDS    | 705227    |
| Hemoglobin subunit alpha 1                                                                                       | HBA1     | 701930    |
| Heparan sulfate-glucosamine 3-sulfotransferase 3A1                                                               | HS3ST3A1 | 718232    |
| Hes family bhlh transcription factor 7                                                                           | HES7     | 721942    |
| Hexamethylene bis-acetamide inducible 1                                                                          | HEXIM1   | 716006    |
| High mobility group box 3                                                                                        | HMGB3    | 703598    |
| Hippocalcin                                                                                                      | HPCA     | 710249    |
| Histone cluster 1, h3d                                                                                           | HIST1H3D | 695092    |
| Histone cluster 3, h2a                                                                                           | HIST3H2A | 693768    |
| Histone deacetylase 10                                                                                           | HDAC10   | 715698    |
| Histone deacetylase 11                                                                                           | HDAC11   | 693537    |
| Histone deacetylase 5                                                                                            | HDAC5    | 711456    |
| Histone deacetylase 6                                                                                            | HDAC6    | 711363    |
| Homeobox A3                                                                                                      | HOXA3    | 699979    |
| Homeodomain interacting protein kinase 1                                                                         | HIPK1    | 707856    |
| HRAS-like suppressor                                                                                             | HRASLS   | 706638    |
| Htra serine peptidase 3                                                                                          | HTRA3    | 722638    |
| Hyaluronan and proteoglycan link protein 3                                                                       | HAPLN3   | 698880    |
| Hyaluronan synthase 1                                                                                            | HAS1     | 719773    |
| Hydroxyacyl-coa dehydrogenase/3-ketoacyl-coa thiolase/enoyl-coa hydratase (trifunctional protein), alpha subunit | HADHA    | 695975    |
| Hydroxysteroid dehydrogenase like 2                                                                              | HSDL2    | 707233    |
| Hyperpolarization activated cyclic nucleotide gated potassium channel 3                                          | HCN3     | 717719    |
| Hypocretin (orexin) neuropeptide precursor                                                                       | HCRT     | 709564    |

|                                                                |         |           |
|----------------------------------------------------------------|---------|-----------|
| IKAROS family zinc finger 5                                    | IKZF5   | 716950    |
| IL2-inducible T-cell kinase                                    | ITK     | 715471    |
| ILK associated serine/threonine phosphatase                    | ILKAP   | 706334    |
| Immunoglobulin superfamily member 21                           | IGSF21  | 701539    |
| Immunoglobulin superfamily member 10                           | IGSF10  | 709661    |
| Immunoglobulin superfamily member 8                            | IGSF8   | 720186    |
| IMP (inosine 5'-monophosphate) dehydrogenase 2                 | IMPDH2  | 708307    |
| IMP3, U3 small nucleolar ribonucleoprotein                     | IMP3    | 706202    |
| Importin 13                                                    | IPO13   | 702007    |
| Inhibin alpha                                                  | INHA    | 574379    |
| Inhibitor of growth family member 1                            | ING1    | 694955    |
| Inositol polyphosphate multikinase                             | IPMK    | 703630    |
| Inositol-3-phosphate synthase 1                                | ISYNA1  | 719487    |
| Insulin like 3                                                 | INSL3   | 100533192 |
| Insulin like growth factor 1 receptor                          | IGF1R   | 708227    |
| Insulin like growth factor 2 mRNA binding protein 3            | IGF2BP3 | 704774    |
| Insulin like growth factor binding protein 7                   | IGFBP7  | 693564    |
| Insulin like growth factor binding protein acid labile subunit | IGFALS  | 722493    |
| Integrator complex subunit 7                                   | INTS7   | 711152    |
| Integrin linked kinase                                         | ILK     | 709944    |
| Integrin subunit alpha 2b                                      | ITGA2B  | 714955    |
| Integrin subunit alpha 4                                       | ITGA4   | 704745    |
| Integrin subunit alpha V                                       | ITGAV   | 707756    |
| Integrin subunit beta 6                                        | ITGB6   | 700454    |
| Integrin subunit beta 7                                        | ITGB7   | 699405    |
| Interferon regulatory factor 2                                 | IRF2    | 694347    |
| Interferon, lambda receptor 1                                  | IFNLR1  | 711625    |
| Interleukin 1 receptor-like 1                                  | IL1RL1  | 711893    |
| Interleukin 20 receptor subunit beta                           | IL20RB  | 716769    |
| Intracisternal A particle-promoted polypeptide                 | IPP     | 706893    |
| Intraflagellar transport 20                                    | IFT20   | 715773    |
| Intraflagellar transport 57                                    | IFT57   | 705088    |
| IQ motif containing F1                                         | IQCF1   | 699719    |
| IQ motif containing K                                          | IQCK    | 695417    |
| IQ motif containing with AAA domain 1                          | IQCA1   | 694173    |
| Iroquois homeobox 6                                            | IRX6    | 698232    |
| Isocitrate dehydrogenase 3 (NAD+) gamma                        | IDH3G   | 698558    |
| Izumo sperm-egg fusion 1                                       | IZUMO1  | 718234    |
| Jagunal homolog 1                                              | JAGN1   | 699718    |
| Jumonji domain containing 1C                                   | JMJD1C  | 697630    |
| Junction adhesion molecule like                                | JAML    | 704919    |
| Kallikrein related peptidase 5                                 | KLK5    | 719467    |
| KDEL motif containing 1                                        | KDEL1   | 702156    |
| Kelch domain containing 8A                                     | KLHDC8A | 698312    |
| Kelch like family member 2                                     | KLHL2   | 704790    |
| Kelch like family member 21                                    | KLHL21  | 704734    |
| Kelch like family member 32                                    | KLHL32  | 709276    |
| Kelch like family member 34                                    | KLHL34  | 696156    |

|                                                                                             |           |           |
|---------------------------------------------------------------------------------------------|-----------|-----------|
| Kelch repeat and BTB (POZ) domain containing 3                                              | KBTBD3    | 706382    |
| Keratin 14, type I                                                                          | KRT14     | 100426176 |
| Keratin 79, type II                                                                         | KRT79     | 700188    |
| Keratin associated protein 12-4                                                             | KRTAP12-4 | 712284    |
| Keratin associated protein 19-3                                                             | KRTAP19-3 | 703677    |
| KIAA0040 ortholog                                                                           | KIAA0040  | 100423512 |
| KIAA0141 ortholog                                                                           | KIAA0141  | 702802    |
| KIAA0355 ortholog                                                                           | KIAA0355  | 705202    |
| KIAA1033 ortholog                                                                           | KIAA1033  | 701501    |
| KIAA1143 ortholog                                                                           | KIAA1143  | 714979    |
| Killer cell lectin-like receptor subfamily B, member 1                                      | KLRB1     | 100430784 |
| Killer cell lectin-like receptor subfamily F, member 1                                      | KLRF1     | 574389    |
| Kin17 DNA and RNA binding protein                                                           | KIN       | 713634    |
| Kinesin family member 13A                                                                   | KIF13A    | 704126    |
| Kinesin family member 1C                                                                    | KIF1C     | 721601    |
| Kinesin family member 5A                                                                    | KIF5A     | 711936    |
| Kinesin family member 6                                                                     | KIF6      | 719593    |
| Kinesin heavy chain member 2A                                                               | KIF2A     | 696561    |
| Kininogen 1                                                                                 | KNG1      | 707466    |
| KIT ligand                                                                                  | KITLG     | 574254    |
| Klotho                                                                                      | KL        | 714042    |
| KRAB-A domain containing 2                                                                  | KRBA2     | 717353    |
| Lactase like                                                                                | LCTL      | 710515    |
| Late cornified envelope 4A                                                                  | LCE4A     | 100423936 |
| Late endosomal/lysosomal adaptor, MAPK and MTOR activator 2                                 | LAMTOR2   | 718110    |
| LCK proto-oncogene, Src family tyrosine kinase                                              | LCK       | 717704    |
| Lectin, galactoside-binding, soluble, 14                                                    | LGALS14   | 698227    |
| Lectin, mannose-binding, 1                                                                  | LMAN1     | 697449    |
| LETM1 domain containing 1                                                                   | LETMD1    | 694422    |
| Leucine rich repeat and coiled-coil centrosomal protein 1                                   | LRRCC1    | 707964    |
| Leucine rich repeat and fibronectin type III domain containing 2                            | LRFN2     | 719621    |
| Leucine rich repeat containing 14                                                           | LRRC14    | 703587    |
| Leucine rich repeat containing 42                                                           | LRRC42    | 714839    |
| Leucine rich repeat protein 1                                                               | LRR1      | 706658    |
| Leucine zipper, down-regulated in cancer 1                                                  | LDOC1     | 696902    |
| Leucine-rich repeat containing 8 family member E                                            | LRRC8E    | 706394    |
| Leucine-rich repeat LGI family member 4                                                     | LGI4      | 718426    |
| Leucine-rich repeats and WD repeat domain containing 1                                      | LRWD1     | 715187    |
| Leukocyte immunoglobulin-like receptor, subfamily A<br>(without TM domain), member 3        | LILRA3    | 692337    |
| Leukocyte immunoglobulin-like receptor, subfamily B<br>(with TM and ITIM domains), member 1 | LILRB1    | 692340    |
| Leukocyte receptor cluster (LRC) member 1                                                   | LENG1     | 693417    |
| Leukocyte specific transcript 1                                                             | LST1      | 100141392 |
| Leukocyte-associated immunoglobulin-like receptor 1                                         | LAIR1     | 695533    |
| Leupaxin                                                                                    | LPXN      | 702033    |
| Ligase I, DNA, ATP-dependent                                                                | LIG1      | 718528    |
| Ligase III, DNA, ATP-dependent                                                              | LIG3      | 715181    |

|                                                                                         |          |           |
|-----------------------------------------------------------------------------------------|----------|-----------|
| LIM and cysteine-rich domains 1                                                         | LMCD1    | 702382    |
| LIM homeobox 5                                                                          | LHX5     | 713417    |
| Limb development membrane protein 1-like                                                | LMBR1L   | 709548    |
| Linker for activation of T-cells family member 2                                        | LAT2     | 693676    |
| Lipocalin 1                                                                             | LCN1     | 711974    |
| Lipocalin 2                                                                             | LCN2     | 697208    |
| Lipocalin 6                                                                             | LCN6     | 574148    |
| Lipoma HMGIC fusion partner-like 3                                                      | LHFPL3   | 697053    |
| Lipopolysaccharide-induced TNF factor                                                   | LITAF    | 711743    |
| LSM12 homolog                                                                           | LSM12    | 714219    |
| LSM14A mrna processing body assembly factor                                             | LSM14A   | 705085    |
| Lymphocyte antigen 6 complex, locus G6C                                                 | LY6G6C   | 716220    |
| Lymphotoxin alpha                                                                       | LTA      | 715425    |
| Lysine-rich nucleolar protein 1                                                         | KNOP1    | 695144    |
| Lysophosphatidic acid receptor 1                                                        | LPAR1    | 709208    |
| Lysophosphatidylcholine acyltransferase 4                                               | LPCAT4   | 696388    |
| MACRO domain containing 1                                                               | MACROD1  | 717961    |
| MAD2L1 binding protein                                                                  | MAD2L1BP | 701099    |
| Major facilitator superfamily domain containing 14B                                     | MFSD14B  | 708498    |
| Major histocompatibility complex, class II, DM alpha                                    | MAMU-DMA | 717870    |
| Major histocompatibility complex, class II, DM beta                                     | MAMU-DMB | 100429856 |
| Male-enhanced antigen 1                                                                 | MEA1     | 699300    |
| MAM domain containing 2                                                                 | MAMDC2   | 700333    |
| Mannose receptor, C type 1                                                              | MRC1     | 701010    |
| Mannosidase, alpha, class 2B, member 1                                                  | MAN2B1   | 716173    |
| Mannosyl (alpha-1,3-)-glycoprotein beta-1,4-N-acetyl glucosaminyltransferase, isozyme A | MGAT4A   | 708094    |
| MAP kinase interacting serine/threonine kinase 1                                        | MKNK1    | 710061    |
| MARVEL domain containing 1                                                              | MARVELD1 | 708237    |
| MAS-related GPR, member X1                                                              | MRGPRX1  | 692101    |
| Matrin 3                                                                                | MATR3    | 100568448 |
| Matrix metallopeptidase 16                                                              | MMP16    | 695120    |
| Matrix metallopeptidase 8                                                               | MMP8     | 703536    |
| Mdm1 nuclear protein                                                                    | MDM1     | 718062    |
| MDM2 binding protein                                                                    | MTBP     | 703121    |
| Mediator complex subunit 11                                                             | MED11    | 709561    |
| Mediator complex subunit 4                                                              | MED4     | 704644    |
| Mediator complex subunit 6                                                              | MED6     | 693320    |
| Mediator complex subunit 8                                                              | MED8     | 700676    |
| Meiosis 1 associated protein                                                            | M1AP     | 710210    |
| Melanocortin 2 receptor accessory protein                                               | MRAP     | 701330    |
| Membrane frizzled-related protein                                                       | MFRP     | 704965    |
| Membrane protein, palmitoylated 4                                                       | MPP4     | 702459    |
| Membrane-spanning 4-domains, subfamily A, member 1                                      | MS4A1    | 696843    |
| Membrane-spanning 4-domains, subfamily A, member 4A                                     | MS4A4A   | 698027    |
| Meprin A subunit alpha                                                                  | MEP1A    | 704781    |
| Mesoderm induction early response 1, family member 2                                    | MIER2    | 701450    |
| Metallo-beta-lactamase domain containing 2                                              | MBLAC2   | 695437    |

|                                                                |          |           |
|----------------------------------------------------------------|----------|-----------|
| Metaxin 1                                                      | MTX1     | 717595    |
| Methionine sulfoxide reductase B3                              | MSRB3    | 717617    |
| Methylphosphate capping enzyme                                 | MEPCE    | 711829    |
| Methyltransferase like 2A                                      | METTL2A  | 717533    |
| Microfibrillar associated protein 3 like                       | MFAP3L   | 694985    |
| Microtubule associated protein 1 light chain 3 alpha           | MAP1LC3A | 707439    |
| Microtubule associated protein 1S                              | MAP1S    | 719196    |
| Midline 1                                                      | MID1     | 709683    |
| Midnolin                                                       | MIDN     | 721215    |
| Minichromosome maintenance complex binding protein             | MCMBP    | 704028    |
| Mitochondrial carrier 1                                        | MTCH1    | 719313    |
| Mitochondrial E3 ubiquitin protein ligase 1                    | MUL1     | 705429    |
| Mitochondrial ribosomal protein L11                            | MRPL11   | 714094    |
| Mitochondrial ribosomal protein L17                            | MRPL17   | 697086    |
| Mitochondrial ribosomal protein L18                            | MRPL18   | 702629    |
| Mitochondrial ribosomal protein L36                            | MRPL36   | 100430880 |
| Mitochondrial ribosomal protein L41                            | MRPL41   | 702768    |
| Mitochondrial ribosomal protein L42                            | MRPL42   | 715676    |
| Mitochondrial ribosomal protein L44                            | MRPL44   | 677716    |
| Mitochondrial ribosomal protein L9                             | MRPL9    | 711235    |
| Mitochondrial ribosomal protein S18C                           | MRPS18C  | 707257    |
| Mitochondrial ribosomal protein S21                            | MRPS21   | 706805    |
| Mitochondrial ribosomal protein S9                             | MRPS9    | 712968    |
| Mitogen-activated protein kinase 11                            | MAPK11   | 715794    |
| Mitogen-activated protein kinase 7                             | MAPK7    | 702837    |
| Mitogen-activated protein kinase 8 interacting protein 3       | MAPK8IP3 | 702388    |
| Mitogen-activated protein kinase associated protein 1          | MAPKAP1  | 702599    |
| Mitogen-activated protein kinase kinase kinase 14              | MAP3K14  | 716258    |
| Mitogen-activated protein kinase kinase kinase 6               | MAP3K6   | 715911    |
| Mitogen-activated protein kinase kinase kinase 9               | MAP3K9   | 693835    |
| Mitogen-activated protein kinase kinase kinase kinase 1        | MAP4K1   | 694259    |
| Molybdenum cofactor synthesis 2                                | MOCS2    | 703689    |
| MORC family CW-type zinc finger 4                              | MORC4    | 701136    |
| Motilin                                                        | MLN      | 574099    |
| Mov10 RISC complex RNA helicase                                | MOV10    | 705910    |
| MRE11 homolog A, double strand break repair nuclease           | MRE11A   | 697566    |
| Msh homeobox 2                                                 | MSX2     | 694227    |
| Muscle RAS oncogene homolog                                    | MRAS     | 716352    |
| Muscleblind-like splicing regulator 3                          | MBNL3    | 706102    |
| Myeloid/lymphoid or mixed-lineage leukemia; translocated to, 6 | MLLT6    | 694045    |
| Myocyte enhancer factor 2C                                     | MEF2C    | 694992    |
| Myoglobin                                                      | MB       | 693269    |
| Myosin IIIB                                                    | MYO3B    | 693391    |
| Myosin light chain 4                                           | MYL4     | 717354    |
| Myosin light chain 7                                           | MYL7     | 707293    |
| Myotubularin 1                                                 | MTM1     | 703131    |
| Myotubularin related protein 2                                 | MTMR2    | 699703    |
| Myotubularin related protein 8                                 | MTMR8    | 708037    |

|                                                                      |         |         |
|----------------------------------------------------------------------|---------|---------|
| N(alpha)-acetyltransferase 35, natc auxiliary subunit                | NAA35   | 710122  |
| N-6 adenine-specific DNA methyltransferase 1 (putative)              | N6AMT1  | 706937  |
| N-acetylglucosamine-1-phosphate transferase, gamma subunit           | GNPTG   | 722441  |
| NAD(P)H dehydrogenase, quinone 2                                     | NQO2    | 707675  |
| NADH dehydrogenase subunit 1                                         | ND1     | 2846627 |
| NADH:ubiquinone oxidoreductase complex assembly factor 4             | NDUFAF4 | 705102  |
| NADH:ubiquinone oxidoreductase subunit A12                           | NDUFA12 | 711970  |
| NADPH oxidase 1                                                      | NOX1    | 701376  |
| Natural killer cell granule protein 7                                | NKG7    | 719624  |
| Nebulette                                                            | NEBL    | 702764  |
| Necdin, MAGE family member                                           | NDN     | 574323  |
| NEDD4 binding protein 2                                              | N4BP2   | 700365  |
| Negative elongation factor complex member C/D                        | NELFCD  | 696053  |
| Negative elongation factor complex member E                          | NELFE   | 716913  |
| Nescient helix-loop-helix 2                                          | NHLH2   | 709920  |
| Neural precursor cell expressed, developmentally down-regulated 1    | NEDD1   | 713673  |
| Neural precursor cell expressed, developmentally down-regulated 8    | NEDD8   | 715763  |
| Neural precursor cell expressed, developmentally down-regulated 9    | NEDD9   | 699359  |
| Neuritin 1                                                           | NRN1    | 722968  |
| Neurofibromin 2 (merlin)                                             | NF2     | 714945  |
| Neurogranin                                                          | NRGN    | 716063  |
| Neuroigin 2                                                          | NLGN2   | 574368  |
| Neuronal differentiation 2                                           | NEUROD2 | 696976  |
| Neuronal guanine nucleotide exchange factor                          | NGEF    | 713917  |
| Neuronal PAS domain protein 2                                        | NPAS2   | 710480  |
| Neuronal PAS domain protein 3                                        | NPAS3   | 717281  |
| Neuronal pentraxin I                                                 | NPTX1   | 718259  |
| Neuropeptide FF-amide peptide precursor                              | NPFF    | 703412  |
| Neutrophil cytosolic factor 1                                        | NCF1    | 694207  |
| NGG1 interacting factor 3 like 1                                     | NIF3L1  | 700572  |
| N-glycanase 1                                                        | NGLY1   | 700842  |
| NHL repeat containing 2                                              | NHLRC2  | 698009  |
| Nicotinamide nucleotide transhydrogenase                             | NNT     | 701110  |
| Ninjurin 1                                                           | NINJ1   | 717218  |
| NK2 homeobox 5                                                       | NKX2-5  | 703795  |
| NLR family member X1                                                 | NLRX1   | 703981  |
| NLR family, pyrin domain containing 6                                | NLRP6   | 720741  |
| N-myristoyltransferase 1                                             | NMT1    | 715885  |
| Non-SMC condensin I complex subunit G                                | NCAPG   | 715235  |
| Non-SMC condensin II complex subunit H2                              | NCAPH2  | 716120  |
| N-terminal Xaa-Pro-Lys N-methyltransferase 1                         | NTMT1   | 716763  |
| Nth-like DNA glycosylase 1                                           | NTHL1   | 694848  |
| Nuclear casein kinase and cyclin-dependent kinase substrate 1        | NUCKS1  | 697298  |
| Nuclear factor of kappa light polypeptide gene enhancer in B-cells 1 | NFKB1   | 710324  |

|                                                                           |          |        |
|---------------------------------------------------------------------------|----------|--------|
| Nuclear receptor coactivator 2                                            | NCOA2    | 693455 |
| Nuclear receptor subfamily 1 group I member 2                             | NR1I2    | 574226 |
| Nuclear receptor subfamily 1 group I member 3                             | NR1I3    | 574249 |
| Nuclear receptor subfamily 5 group A member 1                             | NR5A1    | 694183 |
| Nuclear RNA export factor 3                                               | NXF3     | 695351 |
| Nucleic acid binding protein 2                                            | NABP2    | 709344 |
| Nucleolar protein 10                                                      | NOL10    | 695849 |
| Nucleoporin 37kda                                                         | NUP37    | 697933 |
| Nucleoporin 50kda                                                         | NUP50    | 713282 |
| Nude neurodevelopment protein 1-like 1                                    | NDEL1    | 721973 |
| Nudix hydrolase 1                                                         | NUDT1    | 713078 |
| Nudix hydrolase 22                                                        | NUDT22   | 717864 |
| Olfactomedin 2                                                            | OLFM2    | 711336 |
| Olfactory receptor, family 10, subfamily A, member 6                      | OR10A6   | 709892 |
| Olfactory receptor, family 2, subfamily AG, member 2                      | OR2AG2   | 709556 |
| Olfactory receptor, family 2, subfamily H, member 2                       | OR2H2    | 710946 |
| Olfactory receptor, family 5, subfamily F, member 1                       | OR5F1    | 709943 |
| Olfactory receptor, family 52, subfamily M, member 1                      | OR52M1   | 717723 |
| Olfactory receptor, family 6, subfamily N, member 1                       | OR6N1    | 719958 |
| Optic atrophy 3 (autosomal recessive, with chorea and spastic paraplegia) | OPA3     | 714806 |
| Origin recognition complex subunit 5                                      | ORC5     | 696683 |
| ORMDL sphingolipid biosynthesis regulator 2                               | ORMDL2   | 710296 |
| Oxidized low density lipoprotein (lectin-like) receptor 1                 | OLR1     | 717596 |
| P21 protein (Cdc42/Rac)-activated kinase 1                                | PAK1     | 698585 |
| P450 (cytochrome) oxidoreductase                                          | POR      | 715888 |
| Palmitoyl-protein thioesterase 1                                          | PPT1     | 693377 |
| Pancreatic polypeptide                                                    | PPY      | 713988 |
| Pantothenate kinase 4                                                     | PANK4    | 694804 |
| PAP associated domain containing 7                                        | PAPD7    | 713853 |
| Par-3 family cell polarity regulator                                      | PARD3    | 706472 |
| Paraneoplastic Ma antigen 1                                               | PNMA1    | 697618 |
| PAX3 and PAX7 binding protein 1                                           | PAXBP1   | 700489 |
| PC-esterase domain containing 1A                                          | PCED1A   | 716956 |
| PDZ and LIM domain 1                                                      | PDLIM1   | 702998 |
| PDZ and LIM domain 3                                                      | PDLIM3   | 695779 |
| PDZ domain containing 4                                                   | PDZD4    | 697387 |
| Peptidoglycan recognition protein 1                                       | PGLYRP1  | 718480 |
| Peptidylprolyl isomerase B (cyclophilin B)                                | PPIB     | 706757 |
| Peptidylprolyl isomerase F                                                | PPIF     | 574137 |
| Periaxin                                                                  | PRX      | 702329 |
| Peroxiredoxin 2                                                           | PRDX2    | 716665 |
| PHD finger protein 1                                                      | PHF1     | 718337 |
| PHD finger protein 14                                                     | PHF14    | 694855 |
| Phosphatase and actin regulator 2                                         | PHACTR2  | 700363 |
| Phosphatase, orphan 1                                                     | PHOSPHO1 | 698959 |
| Phosphate cytidylyltransferase 1, choline, alpha                          | PCYT1A   | 722105 |
| Phosphatidylinositol 4-kinase, catalytic, beta                            | PI4KB    | 710104 |

|                                                               |         |           |
|---------------------------------------------------------------|---------|-----------|
| Phosphatidylinositol glycan anchor biosynthesis class B       | PIGB    | 698122    |
| Phosphatidylinositol glycan anchor biosynthesis class H       | PIGH    | 710780    |
| Phosphatidylinositol glycan anchor biosynthesis class S       | PIGS    | 709115    |
| Phosphatidylinositol transfer protein alpha                   | PITPNA  | 721228    |
| Phosphatidylinositol transfer protein, membrane associated 1  | PITPNM1 | 721716    |
| Phosphatidylinositol transfer protein, membrane associated 2  | PITPNM2 | 703969    |
| Phosphodiesterase 11A                                         | PDE11A  | 702458    |
| Phosphodiesterase 5A                                          | PDE5A   | 705592    |
| Phosphodiesterase 6D                                          | PDE6D   | 712629    |
| Phosphofurin acidic cluster sorting protein 1                 | PACS1   | 714696    |
| Phospholipase A2 group XVI                                    | PLA2G16 | 722178    |
| Phospholipase B domain containing 1                           | PLBD1   | 698939    |
| Phospholipase C delta 1                                       | PLCD1   | 696860    |
| Phospholipase D family member 3                               | PLD3    | 701083    |
| Phospholipase D family member 4                               | PLD4    | 707527    |
| Phospholipase D family member 5                               | PLD5    | 706256    |
| Phospholipid scramblase 4                                     | PLSCR4  | 713430    |
| Phosphopantothenoylcysteine decarboxylase                     | PPCDC   | 704015    |
| Phosphorylase, glycogen, muscle                               | PYGM    | 717451    |
| Phytanoyl-coa 2-hydroxylase interacting protein               | PHYHIP  | 715990    |
| Piggybac transposable element derived 1                       | PGBD1   | 707252    |
| Pituitary tumor-transforming 1 interacting protein            | PTTG1IP | 722061    |
| Placenta specific 1                                           | PLAC1   | 709460    |
| Placental growth factor                                       | PGF     | 701219    |
| Plastin 1                                                     | PLS1    | 714391    |
| Platelet derived growth factor D                              | PDGFD   | 704310    |
| Platelet-derived growth factor beta polypeptide               | PDGFB   | 703173    |
| Pleckstrin homology domain containing J1                      | PLEKHJ1 | 710129    |
| Plexin B3                                                     | PLXNB3  | 696903    |
| Poliovirus receptor-related 2 (herpesvirus entry mediator B)  | PVRL2   | 713229    |
| Poly(A) binding protein, cytoplasmic 1                        | PABPC1  | 705847    |
| Poly(A) binding protein, cytoplasmic 3                        | PABPC3  | 708617    |
| Poly(A) polymerase gamma                                      | PAPOLG  | 717781    |
| Poly(ADP-ribose) glycohydrolase                               | PARG    | 709432    |
| Poly(rc) binding protein 2                                    | PCBP2   | 703175    |
| Poly(U) binding splicing factor 60kda                         | PUF60   | 699008    |
| Polycomb group ring finger 2                                  | PCGF2   | 694187    |
| Polyglutamine binding protein 1                               | PQBP1   | 711678    |
| Polyhomeotic homolog 2 (Drosophila)                           | PHC2    | 710201    |
| Polymerase (DNA directed) kappa                               | POLK    | 705713    |
| Polymerase (RNA) II (DNA directed) polypeptide H              | POLR2H  | 100429040 |
| Polymerase (RNA) II (DNA directed) polypeptide I, 14.5kda     | POLR2I  | 712412    |
| Polymerase (RNA) III (DNA directed) polypeptide C (62kd)      | POLR3C  | 696943    |
| Polypeptide N-acetylgalactosaminyltransferase 4               | GALNT4  | 100430608 |
| Post-GPI attachment to proteins 3                             | PGAP3   | 697699    |
| Potassium channel tetramerization domain containing 3         | KCTD3   | 708471    |
| Potassium channel tetramerization domain containing 9         | KCTD9   | 711515    |
| Potassium channel, inwardly rectifying subfamily J, member 11 | KCNJ11  | 696722    |



|                                                                     |          |           |
|---------------------------------------------------------------------|----------|-----------|
| Potassium channel, inwardly rectifying subfamily J, member 5        | KCNJ5    | 714799    |
| Potassium channel, inwardly rectifying subfamily J, member 8        | KCNJ8    | 706369    |
| Potassium channel, two pore domain subfamily K, member 10           | KCNK10   | 694669    |
| Potassium channel, two pore domain subfamily K, member 16           | KCNK16   | 719585    |
| Potassium channel, voltage gated Shaw related subfamily C, member 2 | KCNC2    | 100430904 |
| Potassium voltage-gated channel, modifier subfamily S, member 1     | KCNS1    | 711715    |
| PR domain containing 14                                             | PRDM14   | 693324    |
| Premelanosome protein                                               | PMEL     | 710921    |
| Pre-mrna processing factor 3                                        | PRPF3    | 706898    |
| Presenilin enhancer gamma secretase subunit                         | PSENEN   | 100429008 |
| Presequence translocase-associated motor 16 homolog (S. Cerevisiae) | PAM16    | 704987    |
| Prickle homolog 1                                                   | PRICKLE1 | 701864    |
| Progesterone and adiponectin receptor family member VII             | PAQR7    | 713411    |
| Progesterone and adiponectin receptor family member VIII            | PAQR8    | 708418    |
| Prolactin releasing hormone                                         | PRLH     | 694941    |
| Proline and serine rich 1                                           | PROSER1  | 696606    |
| Proline rich 3                                                      | PRR3     | 711699    |
| Proline rich Gla (G-carboxyglutamic acid) 1                         | PRRG1    | 696938    |
| Proline, glutamate and leucine rich protein 1                       | PELP1    | 677854    |
| Prominin 1                                                          | PROM1    | 714610    |
| Proopiomelanocortin                                                 | POMC     | 694430    |
| Prosaposin                                                          | PSAP     | 709510    |
| Prostaglandin D2 receptor (DP)                                      | PTGDR    | 707918    |
| Prostaglandin D2 synthase                                           | PTGDS    | 707990    |
| Prostaglandin E synthase 3                                          | PTGES3   | 713353    |
| Proteasomal ATPase associated factor 1                              | PAAF1    | 718755    |
| Proteasome subunit alpha 4                                          | PSMA4    | 710417    |
| Proteasome subunit beta 2                                           | PSMB2    | 712193    |
| Protein inhibitor of activated STAT 3                               | PIAS3    | 706775    |
| Protein kinase C, gamma                                             | PRKCG    | 720263    |
| Protein kinase, AMP-activated, alpha 2 catalytic subunit            | PRKAA2   | 717703    |
| Protein phosphatase 1 regulatory subunit 12C                        | PPP1R12C | 698538    |
| Protein phosphatase 1 regulatory subunit 15A                        | PPP1R15A | 718350    |
| Protein phosphatase 3, catalytic subunit, beta isozyme              | PPP3CB   | 706955    |
| Protein phosphatase 3, catalytic subunit, gamma isozyme             | PPP3CC   | 708233    |
| Protein serine kinase H1                                            | PSKH1    | 700845    |
| Protein tyrosine kinase 2 beta                                      | PTK2B    | 712787    |
| Protein tyrosine phosphatase type IVA, member 2                     | PTP4A2   | 706489    |
| Proteinase 3                                                        | PRTN3    | 721131    |
| Protein-O-mannosyltransferase 2                                     | POMT2    | 705604    |
| Proteoglycan 3                                                      | PRG3     | 706381    |
| Protocadherin alpha 5                                               | PCDHA5   | 692083    |
| Protocadherin alpha 7                                               | PCDHA7   | 698370    |
| Protoporphyrinogen oxidase                                          | PPOX     | 719910    |
| PYD and CARD domain containing                                      | PYCARD   | 713563    |
| RAB, member of RAS oncogene family-like 2B                          | RABL2B   | 716615    |

|                                                                   |          |           |
|-------------------------------------------------------------------|----------|-----------|
| RAB11B, member RAS oncogene family                                | RAB11B   | 707462    |
| RAB38, member RAS oncogene family                                 | RAB38    | 705189    |
| RAB5B, member RAS oncogene family                                 | RAB5B    | 708347    |
| RAB6A, member RAS oncogene family                                 | RAB6A    | 718717    |
| RAD21 cohesin complex component                                   | RAD21    | 700633    |
| RAD9 checkpoint clamp component A                                 | RAD9A    | 712345    |
| Ral gtpase activating protein, alpha subunit 1 (catalytic)        | RALGAPA1 | 695674    |
| Ral guanine nucleotide dissociation stimulator                    | RALGDS   | 714436    |
| Ral guanine nucleotide dissociation stimulator-like 1             | RGL1     | 717554    |
| RALY heterogeneous nuclear ribonucleoprotein                      | RALY     | 713317    |
| RAN binding protein 10                                            | RANBP10  | 700911    |
| Rap guanine nucleotide exchange factor 2                          | RAPGEF2  | 704717    |
| Ras association (ralgds/AF-6) domain family (N-terminal) member 8 | RASSF8   | 708284    |
| Ras homolog family member C                                       | RHOC     | 706034    |
| Ras homolog family member D                                       | RHOD     | 712969    |
| Ras homolog family member J                                       | RHOJ     | 705603    |
| Ras homolog family member V                                       | RHOV     | 704675    |
| RAS p21 protein activator 2                                       | RASA2    | 715074    |
| RAS protein activator like 2                                      | RASAL2   | 718958    |
| Rasgef domain family member 1C                                    | RASGEF1C | 706085    |
| RAS-like family 10 member B                                       | RASL10B  | 716171    |
| Ras-related associated with diabetes                              | RRAD     | 695086    |
| Recombination activating gene 1                                   | RAG1     | 697322    |
| Recq helicase-like                                                | RECQL    | 705871    |
| Regenerating family member 3 gamma                                | REG3G    | 711637    |
| Regulator of G-protein signaling like 1                           | RGSL1    | 715693    |
| Relaxin/insulin-like family peptide receptor 4                    | RXFP4    | 718025    |
| Renin                                                             | REN      | 574299    |
| Replication protein A1                                            | RPA1     | 721272    |
| Replication protein A3                                            | RPA3     | 696248    |
| Repulsive guidance molecule family member a                       | RGMA     | 712949    |
| Required for meiotic nuclear division 1 homolog                   | RMND1    | 704665    |
| Retbindin                                                         | RTBDN    | 716766    |
| Retinal outer segment membrane protein 1                          | ROM1     | 100426296 |
| Retinaldehyde binding protein 1                                   | RLBP1    | 699510    |
| Retinoic acid induced 14                                          | RAI14    | 698620    |
| Retinol binding protein 2                                         | RBP2     | 715755    |
| Retinol dehydrogenase 5 (11-cis/9-cis)                            | RDH5     | 709644    |
| REX1, RNA exonuclease 1 homolog                                   | REXO1    | 708931    |
| RFT1 homolog                                                      | RFT1     | 694586    |
| Rho GDP dissociation inhibitor (GDI) beta                         | ARHGDIB  | 702320    |
| Rho guanine nucleotide exchange factor 1                          | ARHGEF1  | 722198    |
| Ribonuclease P/MRP 21kda subunit                                  | RPP21    | 713056    |
| Ribonuclease T2                                                   | RNASET2  | 706533    |
| Ribophorin II                                                     | RPN2     | 708971    |
| Ribosomal modification protein rimk-like family member A          | RIMKLA   | 699767    |
| Ribosomal protein l10a                                            | RPL10A   | 718783    |

|                                                                |        |           |
|----------------------------------------------------------------|--------|-----------|
| Ribosomal protein L17                                          | RPL17  | 698967    |
| Ribosomal protein L23                                          | RPL23  | 694719    |
| Ribosomal protein l23a                                         | RPL23A | 710490    |
| Ribosomal protein L24                                          | RPL24  | 702381    |
| Ribosomal protein L26                                          | RPL26  | 717378    |
| Ribosomal protein l27a                                         | RPL27A | 708863    |
| Ribosomal protein L3                                           | RPL3   | 707176    |
| Ribosomal protein l35a                                         | RPL35A | 714858    |
| Ribosomal protein L4                                           | RPL4   | 710590    |
| Ribosomal protein l7a                                          | RPL7A  | 722215    |
| Ribosomal protein L8                                           | RPL8   | 708535    |
| Ribosomal protein S10                                          | RPS10  | 718606    |
| Ribosomal protein S11                                          | RPS11  | 718844    |
| Ribosomal protein S13                                          | RPS13  | 697513    |
| Ribosomal protein S14                                          | RPS14  | 710901    |
| Ribosomal protein S16                                          | RPS16  | 697219    |
| Ribosomal protein S2                                           | RPS2   | 693615    |
| Ribosomal protein S21                                          | RPS21  | 699565    |
| Ribosomal protein S27                                          | RPS27  | 106992520 |
| Ribosomal protein S28                                          | RPS28  | 707133    |
| Ribosomal protein S4, X-linked                                 | RPS4X  | 699397    |
| Ribosomal protein S5                                           | RPS5   | 711259    |
| Ribosomal protein S7                                           | RPS7   | 721900    |
| Ribosomal protein S8                                           | RPS8   | 703957    |
| Ribosomal protein, large, P0                                   | RPLP0  | 574363    |
| Ribosomal protein, large, P1                                   | RPLP1  | 695442    |
| Ribosomal protein, large, P2                                   | RPLP2  | 700698    |
| Ribosomal RNA processing 8, methyltransferase, homolog (yeast) | RRP8   | 712011    |
| Ribulose-5-phosphate-3-epimerase                               | RPE    | 711322    |
| Ring finger protein 10                                         | RNF10  | 697428    |
| Ring finger protein 152                                        | RNF152 | 699091    |
| Ring finger protein 167                                        | RNF167 | 710656    |
| Ring finger protein 181                                        | RNF181 | 695977    |
| Ring finger protein 38                                         | RNF38  | 693346    |
| Ring finger protein, transmembrane 1                           | RNFT1  | 712052    |
| RNA binding motif protein 18                                   | RBM18  | 698457    |
| RNA binding motif protein 38                                   | RBM38  | 696583    |
| RNA binding motif protein 45                                   | RBM45  | 702714    |
| RNA binding motif protein 7                                    | RBM7   | 695401    |
| RNA pseudouridylate synthase domain containing 3               | RPUSD3 | 700349    |
| RPTOR independent companion of MTOR, complex 2                 | RICTOR | 694915    |
| R-spondin 3                                                    | RSPO3  | 712288    |
| Runt-related transcription factor 3                            | RUNX3  | 719447    |
| SAGA complex associated factor 29                              | SGF29  | 709124    |
| Saitohin                                                       | STH    | 106994064 |
| SAM and SH3 domain containing 3                                | SASH3  | 702089    |
| SEC11 homolog A, signal peptidase complex subunit              | SEC11A | 695951    |

|                                                                                                                  |           |           |
|------------------------------------------------------------------------------------------------------------------|-----------|-----------|
| SEC31 homolog A, COPII coat complex component                                                                    | SEC31A    | 693687    |
| Sec61 translocon alpha 2 subunit                                                                                 | SEC61A2   | 100427728 |
| Secernin 3                                                                                                       | SCRN3     | 698199    |
| Secretogranin II                                                                                                 | SCG2      | 706499    |
| Selectin P                                                                                                       | SELP      | 701277    |
| Selenoprotein M                                                                                                  | SELM      | 718290    |
| Sema domain, immunoglobulin domain (Ig), transmembrane domain (TM) and short cytoplasmic domain, (semaphorin) 4C | SEMA4C    | 707024    |
| Semenogelin I pseudogene                                                                                         | SEMG1P    | 100424776 |
| Serine dehydratase-like                                                                                          | SDSL      | 714721    |
| Serine/threonine kinase 16                                                                                       | STK16     | 702715    |
| Serine/threonine kinase 19                                                                                       | STK19     | 716074    |
| Serine/threonine kinase 38 like                                                                                  | STK38L    | 711047    |
| Serine/threonine/tyrosine kinase 1                                                                               | STYK1     | 717844    |
| Serologically defined colon cancer antigen 3                                                                     | SDCCAG3   | 721750    |
| Serpin peptidase inhibitor, clade B (ovalbumin), member 11                                                       | SERPINB11 | 701449    |
| SET domain containing 4                                                                                          | SETD4     | 696003    |
| SET domain containing 9                                                                                          | SETD9     | 708019    |
| SFI1 centrin binding protein                                                                                     | SFI1      | 716833    |
| SH3 and cysteine rich domain                                                                                     | STAC      | 707350    |
| SH3-domain binding protein 1                                                                                     | SH3BP1    | 700647    |
| Shugoshin-like 1 (S. Pombe)                                                                                      | SGOL1     | 698231    |
| Siah E3 ubiquitin protein ligase 1                                                                               | SIAH1     | 716629    |
| Sialic acid binding Ig-like lectin 1, sialoadhesin                                                               | SIGLEC1   | 717470    |
| Sialic acid binding Ig-like lectin 10                                                                            | SIGLEC10  | 719648    |
| Sialic acid binding Ig-like lectin 5                                                                             | SIGLEC5   | 719730    |
| Sialic acid binding Ig-like lectin 9                                                                             | SIGLEC9   | 719831    |
| Signal peptide, CUB domain, EGF-like 2                                                                           | SCUBE2    | 708152    |
| Signal recognition particle 68kda                                                                                | SRP68     | 705568    |
| Signal sequence receptor, delta                                                                                  | SSR4      | 697266    |
| Signal transducing adaptor family member 1                                                                       | STAP1     | 711834    |
| Sin3A associated protein 18kda                                                                                   | SAP18     | 703078    |
| Sin3A associated protein 25kda                                                                                   | SAP25     | 106997576 |
| SIX homeobox 4                                                                                                   | SIX4      | 703798    |
| SKI-like proto-oncogene                                                                                          | SKIL      | 696680    |
| SLAM family member 8                                                                                             | SLAMF8    | 719494    |
| SLIT and NTRK like family member 1                                                                               | SLITRK1   | 699217    |
| SMAD family member 2                                                                                             | SMAD2     | 697581    |
| SMAD family member 4                                                                                             | SMAD4     | 701803    |
| Small integral membrane protein 19                                                                               | SMIM19    | 705371    |
| Small nuclear ribonucleoprotein polypeptide E                                                                    | SNRPE     | 701418    |
| Small nuclear ribonucleoprotein polypeptides B and B1                                                            | SNRPB     | 716578    |
| Small nuclear ribonucleoprotein, U4/U6.U5 27kda subunit                                                          | SNRNP27   | 708670    |
| Small ubiquitin-like modifier 1                                                                                  | SUMO1     | 703644    |
| SMG9 nonsense mediated mrna decay factor                                                                         | SMG9      | 710940    |
| Smoothelin                                                                                                       | SMTN      | 716424    |
| SMYD family member 5                                                                                             | SMYD5     | 705926    |
| Sodium channel, non voltage gated 1 beta subunit                                                                 | SCNN1B    | 700093    |

|                                                                             |          |        |
|-----------------------------------------------------------------------------|----------|--------|
| Solute carrier family 13 (sodium/sulfate symporter), member 4               | SLC13A4  | 708744 |
| Solute carrier family 16 member 11                                          | SLC16A11 | 721775 |
| Solute carrier family 16 member 13                                          | SLC16A13 | 713985 |
| Solute carrier family 2 (facilitated glucose transporter), member 13        | SLC2A13  | 697822 |
| Solute carrier family 2 (facilitated glucose transporter), member 4         | SLC2A4   | 714701 |
| Solute carrier family 22 (organic anion transporter), member 6              | SLC22A6  | 718377 |
| Solute carrier family 24 (sodium/potassium/calcium exchanger), member 2     | SLC24A2  | 711896 |
| Solute carrier family 24 (sodium/potassium/calcium exchanger), member 5     | SLC24A5  | 714236 |
| Solute carrier family 25 (aspartate/glutamate carrier), member 12           | SLC25A12 | 695173 |
| Solute carrier family 25 (mitochondrial iron transporter), member 28        | SLC25A28 | 710002 |
| Solute carrier family 25 (mitochondrial oxoadipate carrier), member 21      | SLC25A21 | 697370 |
| Solute carrier family 25 (S-adenosylmethionine carrier), member 26          | SLC25A26 | 697960 |
| Solute carrier family 25 member 40                                          | SLC25A40 | 705584 |
| Solute carrier family 25 member 41                                          | SLC25A41 | 702790 |
| Solute carrier family 26 (anion exchanger), member 8                        | SLC26A8  | 719049 |
| Solute carrier family 26 (anion exchanger), member 9                        | SLC26A9  | 696461 |
| Solute carrier family 27 (fatty acid transporter), member 2                 | SLC27A2  | 715237 |
| Solute carrier family 34 (type II sodium/phosphate cotransporter), member 2 | SLC34A2  | 694217 |
| Solute carrier family 35 (UDP-galactose transporter), member A2             | SLC35A2  | 711587 |
| Solute carrier family 35 (UDP-glca/UDP-galnac transporter), member D1       | SLC35D1  | 700175 |
| Solute carrier family 35 member A5                                          | SLC35A5  | 708401 |
| Solute carrier family 35 member E4                                          | SLC35E4  | 716119 |
| Solute carrier family 37 (glucose-6-phosphate transporter), member 2        | SLC37A2  | 712841 |
| Solute carrier family 38 member 7                                           | SLC38A7  | 707671 |
| Solute carrier family 39 (zinc transporter), member 3                       | SLC39A3  | 711564 |
| Solute carrier family 4 (anion exchanger), member 2                         | SLC4A2   | 713966 |
| Solute carrier family 4, sodium borate transporter, member 11               | SLC4A11  | 718393 |
| Solute carrier family 41 (magnesium transporter), member 1                  | SLC41A1  | 696944 |
| Solute carrier family 44 member 4                                           | SLC44A4  | 715779 |
| Solute carrier family 46 member 2                                           | SLC46A2  | 719542 |
| Solute carrier family 51 beta subunit                                       | SLC51B   | 708427 |
| Solute carrier family 6 (neurotransmitter transporter), member 1            | SLC6A1   | 696617 |
| Solute carrier family 6 (neurotransmitter transporter), member 13           | SLC6A13  | 705918 |
| Solute carrier family 6 (neurotransmitter transporter), member 2            | SLC6A2   | 613238 |
| Solute carrier family 6 (neurotransmitter transporter), member 3            | SLC6A3   | 574143 |
| Solute carrier family 6 (neurotransmitter transporter), member 7            | SLC6A7   | 711915 |
| Solute carrier family 6 (neutral amino acid transporter), member 18         | SLC6A18  | 723065 |
| Solute carrier family 9, subfamily A (NHE3, cation proton                   | SLC9A3R2 | 694658 |

|                                                                                                      |          |           |
|------------------------------------------------------------------------------------------------------|----------|-----------|
| antiporter 3), member 3 regulator 2                                                                  |          |           |
| Solute carrier family 9, subfamily A (NHE4, cation proton antiporter 4), member 4                    | SLC9A4   | 712136    |
| Solute carrier family 9, subfamily B (NHA1, cation proton antiporter 1), member 1                    | SLC9B1   | 710949    |
| Solute carrier organic anion transporter family member 2B1                                           | SLCO2B1  | 694829    |
| Sonic hedgehog                                                                                       | SHH      | 716553    |
| Sorbin and SH3 domain containing 3                                                                   | SORBS3   | 716198    |
| Sorting nexin 11                                                                                     | SNX11    | 696913    |
| Sorting nexin 13                                                                                     | SNX13    | 714019    |
| Sorting nexin 14                                                                                     | SNX14    | 696632    |
| Sorting nexin 33                                                                                     | SNX33    | 706309    |
| Sorting nexin 4                                                                                      | SNX4     | 716049    |
| Sp2 transcription factor                                                                             | SP2      | 694834    |
| SPARC like 1                                                                                         | SPARCL1  | 701468    |
| SPARC related modular calcium binding 1                                                              | SMOC1    | 712994    |
| Spectrin, beta, non-erythrocytic 1                                                                   | SPTBN1   | 716794    |
| Sperm acrosome associated 1                                                                          | SPACA1   | 699611    |
| Sperm flagellar 1                                                                                    | SPEF1    | 717547    |
| Sperm specific antigen 2                                                                             | SSFA2    | 705181    |
| Spermatogenesis associated 2-like                                                                    | SPATA2L  | 699974    |
| Sphingosine-1-phosphate phosphatase 2                                                                | SGPP2    | 705674    |
| Spindle and kinetochore associated complex subunit 2                                                 | SKA2     | 711092    |
| Splicing factor 3a subunit 2                                                                         | SF3A2    | 721469    |
| SPRY domain containing 4                                                                             | SPRYD4   | 713037    |
| Src-related kinase lacking C-terminal regulatory tyrosine and N-terminal myristylation sites         | SRMS     | 719587    |
| SREK1-interacting protein 1                                                                          | SREK1IP1 | 695436    |
| SRY-box 21                                                                                           | SOX21    | 695074    |
| ST3 beta-galactoside alpha-2,3-sialyltransferase 2                                                   | ST3GAL2  | 709319    |
| ST3 beta-galactoside alpha-2,3-sialyltransferase 4                                                   | ST3GAL4  | 717792    |
| Stabilizer of axonemal microtubules 1                                                                | SAXO1    | 712700    |
| Star related lipid transfer domain containing 13                                                     | STARD13  | 714104    |
| Star related lipid transfer domain containing 3                                                      | STARD3   | 697212    |
| Star related lipid transfer domain containing 5                                                      | STARD5   | 713308    |
| Stathmin 2                                                                                           | STMN2    | 699264    |
| Sterile alpha motif domain containing 15                                                             | SAMD15   | 706090    |
| Steroid-5-alpha-reductase, alpha polypeptide 1 (3-oxo-5 alpha-steroid delta 4-dehydrogenase alpha 1) | SRD5A1   | 695103    |
| Sterol O-acyltransferase 2                                                                           | SOAT2    | 701171    |
| Stomatin like 2                                                                                      | STOML2   | 698458    |
| Stonin 1                                                                                             | STON1    | 106992944 |
| Storkhead box 2                                                                                      | STOX2    | 693692    |
| Stratifin                                                                                            | SFN      | 715055    |
| Sulfiredoxin 1                                                                                       | SRXN1    | 714997    |
| SUMO1 activating enzyme subunit 1                                                                    | SAE1     | 717918    |
| SUMO1/sentrin specific peptidase 5                                                                   | SEN5     | 710223    |
| SUMO1/sentrin specific peptidase 7                                                                   | SEN7     | 701453    |

|                                                                                   |          |           |
|-----------------------------------------------------------------------------------|----------|-----------|
| Superoxide dismutase 3, extracellular                                             | SOD3     | 715931    |
| Suppression of tumorigenicity 13 (colon carcinoma)<br>(Hsp70 interacting protein) | ST13     | 705664    |
| Suppression of tumorigenicity 7                                                   | ST7      | 704776    |
| Surfactant associated 2                                                           | SFTA2    | 714397    |
| SURP and G-patch domain containing 1                                              | SUGP1    | 719772    |
| SWIM-type zinc finger 7 associated protein 1                                      | SWSAP1   | 716529    |
| Synapse differentiation inducing 1                                                | SYNDIG1  | 704737    |
| Synaptogyrin 1                                                                    | SYNGR1   | 100427480 |
| Synaptophysin                                                                     | SYP      | 715739    |
| Synaptopodin                                                                      | SYNPO    | 711221    |
| Synaptotagmin VII                                                                 | SYT7     | 722368    |
| Synemin                                                                           | SYNM     | 717194    |
| Synovial sarcoma translocation gene on chromosome 18-like 2                       | SS18L2   | 716387    |
| Syntaxin 17                                                                       | STX17    | 714699    |
| Syntaxin 1B                                                                       | STX1B    | 714251    |
| Synuclein alpha interacting protein                                               | SNCAIP   | 700372    |
| Synuclein beta                                                                    | SNCB     | 697484    |
| Tankyrase 1 binding protein 1                                                     | TNKS1BP1 | 704825    |
| TAO kinase 2                                                                      | TAOK2    | 707777    |
| Target of EGR1, member 1 (nuclear)                                                | TOE1     | 705770    |
| Taste 1 receptor member 1                                                         | TAS1R1   | 720987    |
| Taste 2 receptor member 16                                                        | TAS2R16  | 695211    |
| TATA-box binding protein associated factor 1                                      | TAF1     | 698800    |
| TATA-box binding protein associated factor 10                                     | TAF10    | 710022    |
| TATA-box binding protein associated factor 2                                      | TAF2     | 702411    |
| TATA-box binding protein associated factor 5                                      | TAF5     | 714558    |
| TBC1 domain family member 15                                                      | TBC1D15  | 718743    |
| TBC1 domain family member 17                                                      | TBC1D17  | 719093    |
| TBC1 domain family member 19                                                      | TBC1D19  | 694865    |
| TBK1 binding protein 1                                                            | TBKBP1   | 693913    |
| T-box 21                                                                          | TBX21    | 694044    |
| T-box 4                                                                           | TBX4     | 712702    |
| T-cell acute lymphocytic leukemia 2                                               | TAL2     | 712138    |
| TCF3 (E2A) fusion partner (in childhood Leukemia)                                 | TFPT     | 720296    |
| T-complex 11, testis-specific                                                     | TCP11    | 718695    |
| T-complex 11, testis-specific-like 1                                              | TCP11L1  | 694899    |
| T-complex 11, testis-specific-like 2                                              | TCP11L2  | 702578    |
| Teashirt zinc finger homeobox 1                                                   | TSHZ1    | 703018    |
| TEK tyrosine kinase, endothelial                                                  | TEK      | 707455    |
| TELO2 interacting protein 2                                                       | TTI2     | 696776    |
| Telomeric repeat binding factor 2, interacting protein                            | TERF2IP  | 712149    |
| Tenascin XB                                                                       | TNXB     | 716998    |
| TERF1 (TRF1)-interacting nuclear factor 2                                         | TINF2    | 715812    |
| Testis expressed 19                                                               | TEX19    | 716048    |
| Testis expressed 28                                                               | TEX28    | 699141    |
| Testis expressed 30                                                               | TEX30    | 701917    |
| Testis expressed 43                                                               | TEX43    | 703228    |

|                                                                    |          |           |
|--------------------------------------------------------------------|----------|-----------|
| Testis-specific serine kinase 2                                    | TSSK2    | 711241    |
| Testis-specific serine kinase 3                                    | TSSK3    | 708182    |
| Tetratricopeptide repeat domain 1                                  | TTC1     | 695225    |
| Tetratricopeptide repeat domain 12                                 | TTC12    | 693909    |
| Tetratricopeptide repeat domain 14                                 | TTC14    | 710895    |
| Tetratricopeptide repeat domain 7B                                 | TTC7B    | 696029    |
| Tetratricopeptide repeat domain 9C                                 | TTC9C    | 718583    |
| TGF-beta activated kinase 1/MAP3K7 binding protein 1               | TAB1     | 703409    |
| THAP domain containing 7                                           | THAP7    | 696208    |
| Thioredoxin domain containing 9                                    | TXNDC9   | 709303    |
| Thioredoxin-related transmembrane protein 1                        | TMX1     | 707057    |
| Thioredoxin-related transmembrane protein 4                        | TMX4     | 718375    |
| THO complex 3                                                      | THOC3    | 695561    |
| THO complex 6                                                      | THOC6    | 700217    |
| Thy-1 cell surface antigen                                         | THY1     | 705321    |
| Thymidine phosphorylase                                            | TYMP     | 716161    |
| Thymosin beta 4, X-linked                                          | TMSB4X   | 710959    |
| Thymus, brain and testes associated                                | TBATA    | 710055    |
| Thyroid hormone receptor, beta                                     | THRB     | 699969    |
| TIA1 cytotoxic granule-associated RNA binding protein              | TIA1     | 702366    |
| Titin-cap                                                          | TCAP     | 697327    |
| TNF alpha induced protein 6                                        | TNFAIP6  | 694699    |
| TNNI3 interacting kinase                                           | TNNI3K   | 100533984 |
| Tocopherol (alpha) transfer protein-like                           | TTPAL    | 712620    |
| Toll-like receptor 6                                               | TLR6     | 574342    |
| Topoisomerase (DNA) I                                              | TOP1     | 697300    |
| Torsin A interacting protein 2                                     | TOR1AIP2 | 716691    |
| TRAF3 interacting protein 3                                        | TRAF3IP3 | 712895    |
| Trafficking protein particle complex 3                             | TRAPPC3  | 713705    |
| Transaldolase 1                                                    | TALDO1   | 720828    |
| Transcobalamin 1                                                   | TCN1     | 698583    |
| Transcription elongation factor A (SII)-like 1                     | TCEAL1   | 696826    |
| Transcription factor 19                                            | TCF19    | 714141    |
| Transcription factor EC                                            | TFEC     | 704124    |
| Transducin (beta)-like 1 X-linked receptor 1                       | TBL1XR1  | 712740    |
| Transducin (beta)-like 3                                           | TBL3     | 693864    |
| Transforming growth factor beta receptor associated protein 1      | TGFBRAP1 | 713102    |
| Transforming, acidic coiled-coil containing protein 3              | TACC3    | 712898    |
| Transient receptor potential cation channel, subfamily M, member 2 | TRPM2    | 722161    |
| Translocase of inner mitochondrial membrane 10 homolog B (yeast)   | TIMM10B  | 711085    |
| Translocase of inner mitochondrial membrane 17 homolog B (yeast)   | TIMM17B  | 714895    |
| Translocase of inner mitochondrial membrane domain containing 1    | TIMMDC1  | 712414    |
| Translocase of outer mitochondrial membrane 22 homolog (yeast)     | TOMM22   | 701286    |



|                                                                   |          |           |
|-------------------------------------------------------------------|----------|-----------|
| Translocase of outer mitochondrial membrane 40 homolog (yeast)    | TOMM40   | 713297    |
| Translocase of outer mitochondrial membrane 6 homolog (yeast)     | TOMM6    | 100423264 |
| Transmembrane 4 L six family member 5                             | TM4SF5   | 709844    |
| Transmembrane 6 superfamily member 2                              | TM6SF2   | 719756    |
| Transmembrane and immunoglobulin domain containing 1              | TMIGD1   | 712350    |
| Transmembrane and immunoglobulin domain containing 3              | TMIGD3   | 104564312 |
| Transmembrane channel like 8                                      | TMC8     | 100423640 |
| Transmembrane phosphoinositide 3-phosphatase and tensin homolog 2 | TPTE2    | 704870    |
| Transmembrane protease, serine 13                                 | TMPRSS13 | 698586    |
| Transmembrane protease, serine 2                                  | TMPRSS2  | 715138    |
| Transmembrane protein 104                                         | TMEM104  | 698592    |
| Transmembrane protein 11                                          | TMEM11   | 704970    |
| Transmembrane protein 115                                         | TMEM115  | 702164    |
| Transmembrane protein 123                                         | TMEM123  | 702833    |
| Transmembrane protein 135                                         | TMEM135  | 704963    |
| Transmembrane protein 136                                         | TMEM136  | 706163    |
| Transmembrane protein 138                                         | TMEM138  | 693905    |
| Transmembrane protein 141                                         | TMEM141  | 721687    |
| Transmembrane protein 145                                         | TMEM145  | 709268    |
| Transmembrane protein 175                                         | TMEM175  | 696545    |
| Transmembrane protein 179B                                        | TMEM179B | 718518    |
| Transmembrane protein 183A                                        | TMEM183A | 704195    |
| Transmembrane protein 198                                         | TMEM198  | 704089    |
| Transmembrane protein 205                                         | TMEM205  | 714330    |
| Transmembrane protein 255A                                        | TMEM255A | 696050    |
| Transmembrane protein 37                                          | TMEM37   | 695060    |
| Transmembrane protein 45B                                         | TMEM45B  | 718735    |
| Transmembrane protein 47                                          | TMEM47   | 693975    |
| Transmembrane protein 5                                           | TMEM5    | 717102    |
| Transmembrane protein 55B                                         | TMEM55B  | 100428000 |
| Transmembrane protein 60                                          | TMEM60   | 693679    |
| Trinucleotide repeat containing 6A                                | TNRC6A   | 701680    |
| Trinucleotide repeat containing 6C                                | TNRC6C   | 714829    |
| Tripartite motif containing 14                                    | TRIM14   | 715418    |
| Tripartite motif containing 3                                     | TRIM3    | 710846    |
| Tripartite motif containing 56                                    | TRIM56   | 713833    |
| Tripartite motif containing 62                                    | TRIM62   | 709927    |
| Tripartite motif containing 72, E3 ubiquitin protein ligase       | TRIM72   | 713623    |
| TRK-fused gene                                                    | TFG      | 700972    |
| Trna methyltransferase 11-2 homolog (S. Cerevisiae)               | TRMT112  | 717676    |
| Tropomodulin 1                                                    | TMOD1    | 715838    |
| Tropomyosin 2 (beta)                                              | TPM2     | 696604    |
| Tropomyosin 3                                                     | TPM3     | 716336    |
| Troponin T type 2 (cardiac)                                       | TNNT2    | 709882    |
| Trub pseudouridine (psi) synthase family member 2                 | TRUB2    | 717619    |
| Tryptase gamma 1                                                  | TPSG1    | 100425752 |
| TSR2, 20S rRNA accumulation, homolog (S. Cerevisiae)              | TSR2     | 701234    |

|                                                                    |           |           |
|--------------------------------------------------------------------|-----------|-----------|
| TSSK6 activating co-chaperone                                      | TSACC     | 719490    |
| Tubulin alpha 4a                                                   | TUBA4A    | 702583    |
| Tubulin alpha like 3                                               | TUBAL3    | 722506    |
| Tubulin folding cofactor C                                         | TBCC      | 696997    |
| Tubulin tyrosine ligase like 4                                     | TTLL4     | 700064    |
| Tumor protein, translationally-controlled 1                        | TPT1      | 702155    |
| Tumor suppressing subtransferable candidate 1                      | TSSC1     | 707650    |
| Twist family bhlh transcription factor 2                           | TWIST2    | 697078    |
| Two pore segment channel 1                                         | TPCN1     | 712964    |
| Tyrosine hydroxylase                                               | TH        | 721137    |
| Tyrosine kinase, non-receptor, 1                                   | TNK1      | 715180    |
| UBA domain containing 2                                            | UBAC2     | 703484    |
| Ubiquitin A-52 residue ribosomal protein fusion product 1          | UBA52     | 720243    |
| Ubiquitin B                                                        | UBB       | 696110    |
| Ubiquitin conjugating enzyme E2 variant 1                          | UBE2V1    | 100425552 |
| Ubiquitin conjugating enzyme E2O                                   | UBE2O     | 710529    |
| Ubiquitin like 5                                                   | UBL5      | 711015    |
| Ubiquitin like 7                                                   | UBL7      | 702305    |
| Ubiquitin protein ligase E3D                                       | UBE3D     | 694910    |
| Ubiquitin related modifier 1                                       | URM1      | 722618    |
| Ubiquitin specific peptidase 10                                    | USP10     | 718471    |
| Ubiquitin specific peptidase 2                                     | USP2      | 705191    |
| Ubiquitin specific peptidase 21                                    | USP21     | 719894    |
| Ubiquitin specific peptidase 47                                    | USP47     | 701660    |
| Ubiquitin specific peptidase 51                                    | USP51     | 705861    |
| Ubiquitin specific peptidase 7 (herpes virus-associated)           | USP7      | 714625    |
| Ubiquitination factor E4B                                          | UBE4B     | 713348    |
| UBX domain protein 11                                              | UBXN11    | 719826    |
| UDP-Gal:betaglcnaac beta 1,4- galactosyltransferase, polypeptide 3 | B4GALT3   | 719920    |
| UHRF1 binding protein 1-like                                       | UHRF1BP1L | 694816    |
| Unc-79 homolog (C. Elegans)                                        | UNC79     | 699262    |
| Uncoupling protein 3 (mitochondrial, proton carrier)               | UCP3      | 574125    |
| Uridine monophosphate synthetase                                   | UMPS      | 715664    |
| Uromodulin                                                         | UMOD      | 695883    |
| Urotensin 2                                                        | UTS2      | 574246    |
| Urotensin 2 receptor                                               | UTS2R     | 574245    |
| Usher syndrome 1C                                                  | USH1C     | 696911    |
| USP6 N-terminal like                                               | USP6NL    | 694275    |
| Vac14 homolog (S. Cerevisiae)                                      | VAC14     | 708741    |
| Vacuolar protein sorting 4 homolog A (S. Cerevisiae)               | VPS4A     | 705277    |
| V-akt murine thymoma viral oncogene homolog 3                      | AKT3      | 714717    |
| Valyl-trna synthetase                                              | VARS      | 715537    |
| Vascular endothelial growth factor A                               | VEGFA     | 574209    |
| Vasoactive intestinal peptide                                      | VIP       | 703566    |
| Vasohibin 1                                                        | VASH1     | 703906    |
| V-crkl avian sarcoma virus CT10 oncogene homolog                   | CRK       | 701185    |
| VGF nerve growth factor inducible                                  | VGF       | 719578    |
| Vitronectin                                                        | VTN       | 708499    |

|                                                                        |          |           |
|------------------------------------------------------------------------|----------|-----------|
| V-maf avian musculoaponeurotic fibrosarcoma oncogene homolog B         | MAFB     | 712578    |
| Von Willebrand factor                                                  | VWF      | 722019    |
| Von Willebrand factor A domain containing 1                            | VWA1     | 701765    |
| VPS26 retromer complex component B                                     | VPS26B   | 694566    |
| VPS29 retromer complex component                                       | VPS29    | 709646    |
| VPS54 GARP complex subunit                                             | VPS54    | 695397    |
| WAP four-disulfide core domain 10A                                     | WFDC10A  | 717384    |
| WAP four-disulfide core domain 8                                       | WFDC8    | 710108    |
| WAS protein family member 3                                            | WASF3    | 709849    |
| WD repeat containing, antisense to TP73                                | WRAP73   | 695276    |
| WD repeat domain 70                                                    | WDR70    | 706130    |
| WD repeat domain 72                                                    | WDR72    | 697128    |
| WD repeat domain 74                                                    | WDR74    | 718460    |
| WD repeat domain 77                                                    | WDR77    | 677686    |
| WD repeat domain 83 opposite strand                                    | WDR83OS  | 716302    |
| WD repeat, sterile alpha motif and U-box domain containing 1           | WDSUB1   | 699456    |
| Williams Beuren syndrome chromosome region 22                          | WBSCR22  | 720121    |
| Wilms tumor 1 associated protein                                       | WTAP     | 702295    |
| Wingless-type MMTV integration site family member 10B                  | WNT10B   | 708906    |
| Wingless-type MMTV integration site family member 11                   | WNT11    | 696845    |
| Wolfram syndrome 1 (wolframin)                                         | WFS1     | 710948    |
| WSC domain containing 1                                                | WSCD1    | 712488    |
| WW domain binding protein 1                                            | WBP1     | 709202    |
| WW domain containing E3 ubiquitin protein ligase 2                     | WWP2     | 705464    |
| X-linked Kx blood group                                                | XK       | 696407    |
| X-linked Kx blood group related, X-linked                              | XKRX     | 701721    |
| XPA binding protein 2                                                  | XAB2     | 704109    |
| X-ray repair complementing defective repair in Chinese hamster cells 6 | XRCC6    | 707975    |
| XRCC6 binding protein 1                                                | XRCC6BP1 | 712932    |
| Xylosyltransferase II                                                  | XYLT2    | 705139    |
| Ybey metalloproteinase (putative)                                      | YBEY     | 721807    |
| YEATS domain containing 4                                              | YEATS4   | 718376    |
| Yip1 domain family member 2                                            | YIPF2    | 713753    |
| Yip1 domain family member 4                                            | YIPF4    | 706819    |
| Yippee like 3                                                          | YPEL3    | 708740    |
| YTH N(6)-methyladenosine RNA binding protein 2                         | YTHDF2   | 717225    |
| Zinc and ring finger 2, E3 ubiquitin protein ligase                    | ZNRF2    | 698413    |
| Zinc finger and BTB domain containing 37                               | ZBTB37   | 708769    |
| Zinc finger and BTB domain containing 39                               | ZBTB39   | 713914    |
| Zinc finger and BTB domain containing 47                               | ZBTB47   | 100428360 |
| Zinc finger and SCAN domain containing 2                               | ZSCAN2   | 695673    |
| Zinc finger CCCH-type containing 11A                                   | ZC3H11A  | 701537    |
| Zinc finger CCCH-type containing 12A                                   | ZC3H12A  | 713604    |
| Zinc finger CCCH-type containing 3                                     | ZC3H3    | 708584    |
| Zinc finger homeobox 3                                                 | ZFHX3    | 706074    |
| Zinc finger protein 19                                                 | ZNF19    | 708211    |

|                                                |         |           |
|------------------------------------------------|---------|-----------|
| Zinc finger protein 215                        | ZNF215  | 708494    |
| Zinc finger protein 22                         | ZNF22   | 706208    |
| Zinc finger protein 221                        | ZNF221  | 100423744 |
| Zinc finger protein 280D                       | ZNF280D | 699509    |
| Zinc finger protein 287                        | ZNF287  | 695524    |
| Zinc finger protein 385A                       | ZNF385A | 705436    |
| Zinc finger protein 397                        | ZNF397  | 714878    |
| Zinc finger protein 408                        | ZNF408  | 714213    |
| Zinc finger protein 436                        | ZNF436  | 709638    |
| Zinc finger protein 460                        | ZNF460  | 710080    |
| Zinc finger protein 474                        | ZNF474  | 700119    |
| Zinc finger protein 484                        | ZNF484  | 711976    |
| Zinc finger protein 496                        | ZNF496  | 709694    |
| Zinc finger protein 503                        | ZNF503  | 703912    |
| Zinc finger protein 584                        | ZNF584  | 711420    |
| Zinc finger protein 595                        | ZNF595  | 716693    |
| Zinc finger protein 668                        | ZNF668  | 712709    |
| Zinc finger protein 682                        | ZNF682  | 719936    |
| Zinc finger protein 7                          | ZNF7    | 715735    |
| Zinc finger protein 740                        | ZNF740  | 701428    |
| Zinc finger protein 774                        | ZNF774  | 702985    |
| Zinc finger protein 804B                       | ZNF804B | 704561    |
| Zinc finger protein 835                        | ZNF835  | 705945    |
| Zinc finger, AN1-type domain 2B                | ZFAND2B | 702027    |
| Zinc finger, AN1-type domain 4                 | ZFAND4  | 708136    |
| Zinc finger, CCHC domain containing 3          | ZCCHC3  | 714477    |
| Zinc finger, DHHC-type containing 12           | ZDHHC12 | 722606    |
| Zinc finger, DHHC-type containing 16           | ZDHHC16 | 705982    |
| Zinc finger, DHHC-type containing 5            | ZDHHC5  | 704863    |
| Zinc finger, matrin-type 5                     | ZMAT5   | 715058    |
| Zinc finger, MYM-type 4                        | ZMYM4   | 712793    |
| Zinc finger, MYND-type containing 11           | ZMYND11 | 708761    |
| Zona pellucida glycoprotein 3 (sperm receptor) | ZP3     | 719925    |
| Zyxin                                          | ZYX     | 706407    |

---

Table S6: List of input genes in network objects of top-scored GO processes for two groups\*

| Group number<br>(group description)               | GO process**                                     | Input genes in network objects<br>(number of genes involved)                                                                                                                                                                                                                                                                                                                                                                                                                                                                                                                                                                                                                                                                                                                                                                                                                                                                                                                                                                                                                                      |
|---------------------------------------------------|--------------------------------------------------|---------------------------------------------------------------------------------------------------------------------------------------------------------------------------------------------------------------------------------------------------------------------------------------------------------------------------------------------------------------------------------------------------------------------------------------------------------------------------------------------------------------------------------------------------------------------------------------------------------------------------------------------------------------------------------------------------------------------------------------------------------------------------------------------------------------------------------------------------------------------------------------------------------------------------------------------------------------------------------------------------------------------------------------------------------------------------------------------------|
| Group 1<br>(Conception cycle)<br>non-self antigen | Positive regulation of<br>tolerance induction to | HLA-A1, HLA-A2, HLA-A3, HLA-A11, HLA-A23, HLA-A24, HLA-A25, HLA-A26, HLA-A29, HLA-A30, HLA-A31, HLA-A32, HLA-A33, HLA-A34, HLA-A36, HLA-A43, HLA-A66, HLA-A68, HLA-A69, HLA-A74, HLA-A80, HLA-C, HLA-E.1 (23)                                                                                                                                                                                                                                                                                                                                                                                                                                                                                                                                                                                                                                                                                                                                                                                                                                                                                     |
| Group 2<br>(Non-fecund cycle)                     | Metabolic process                                | A2MR, A2M, AASDHPPT, AASS, AATM, ABBP1, ABCA1, ABHD12, ABI3, ABTAP, ACAA2, ACACA, ACADM, ACAT1, ACON, ACOX1, ACTR5, ACY2, ADAM21, ADAMTS6, ADD3, ADD1, ADDA, ADIPOR2, ADSS, AES (GRG), AGAL, AGT2, AGXT2L1, AJUBA, AK3L1, AKAP2, AKAP350, AKIP, AL1A1, ALDR1, ALDP, ALDR, ALG2, ALG5, ALK-2, ALKBH5, ADDA, ALY, AMPD2, AMPD, AMYC, ANAPC4, ANKRD15, ANXA1, ANT, APA1, APEX, APEX2, APG16L1, APG3, APG5, APM2, APPBP1, ARF4, ARGLU1, ARID4B, ARL6, ARV1, ASPHD1, ASTE1, ATE1, ATF/CREB, ATF-4, ATG16L2, ATG4C, ATG4D, ATP1A1, ATP5A, ATP5B, ATP5C, ATP5D, ATP5J, ATP5O, ATP6AP2, ATPBD3, ATP1, ATR, ATRIP, ATRX, AUF1, AURKB, AURKC, B3GA3, B3GN1, B4GT3, B56G, BAF180/200, BAF200, BAF47, BAHD1, BAIP3, BARD1, BAZ1B, BBS6, BBS12, BC023814, BCKDHB, BCKDK, BCL6, BECN1, BEND6, ARRB2, SNCB, B-FABP, BLIMP1 (PRDI-BF1), BMAL1, BMP4, BRD1, BRD7, BRM, BRP44L, BTBD1, BTF3, BTG1, BUB3, BXDC5, BYSTIN, C11N, C1D, C11orf51, C14orf102, C14orf104, C14orf138, C14orf147, C16orf53, C17orf79, C1orf156, C1orf51, C1orf77, C2orf56, C3orf31, C4orf31, C5orf35, C6orf130, C6orf211, C8orf59, C9orf156, |

C20orf12, C20orf72, C21orf66, C1TC, CAC, CAD, CALCB, CALCA, CAPN2, CAPN3, CAPN10, CAMK2G, CAPER, CHST7, CARS2, CSNK2A2, CASP1, CASP4, CASP9, CTSA, CTSB, CTSL, CBF2, CBFA2T3, CCAR1, CCDC59, CDC5L, CD9, CDC7, CDCA5, CDCA8, CDC16, CDC23, CDC25, CDC25C, CDC26, CDC37, CDK1 (p34), CDK2, CDK9, CDX4, CECR5, CENP-F, CETN2, CEP110, CEP290, CEPT1, CGAT2, CGGBP1, CGI-09, CGRP, CHD1, CHERP, CHIP, Chk2, CHMP4B, CHST1, CHST14, CHST7, CHSTD, CLIC4, CLK3, CLP1, CMAS, CNOT3, CNOT7, COQ2, COL12A1, COMMD2, COMMD6, COMT, COP1, COPS3, COPS4, COPS6, COX4, COX4I1, COX5, COX6C, COX7C, CPA5, CPEB2, CPGL2, CPT1B, CPVL, CRAF1, CRAT, SLC6A8, CREB3, CREB4, CRKRS, CRY1, CSTF3, CSTF64, CTBP1, CTBP2, CTDP1, CTDSPL2, CTPS1), CTR9, CUL4, CUL4A, CUL7, CVAK104, CYC1, CCNB3, CCNE1, CCNH, CCNT2, CYP33, CYPG, CYPH, CYHR1, CYP21A2, CYRS, D53, D123, DACH1, DAD-1, DAK, DALRD3, DAP3, DATF1, DBC1, DCLRE1B, DCP1B, DCTN6, DCUN1D4, DCUN1D5, DDAH1, DDR1, DDR2, DDT, DDX1, DDX5, DDX9, DDX27, DDX30, DDX39, DDX48, DDX54, DECR, DEFM, DEK, DERL1, DERL2, DSP, DGUOK, DHDDS, DHRS1, DHX15, DHX29, DICER1, DIO2, DISP1, DJ1, DLG1, DYNLL1, LIG3, POLB, DNAJC8, DNMT1, DNPEP, DOM3Z, DPM2, DPP8, DRG1, DRIP130, DVL3, DSS1, DTX3, DUE-B, DUS3L, DUSP11, DUSP12, DUSP23, DUSP26, DVL-1, DYNLL, DYRK3, E2F1, E2F3, E2F4, E2F5, E2I, EDEM3, EED, EEF1E1, EGFLAM, EGLN2, EHZF, EIF2AK3, EIF2S2, EIF3S3, EIF3S6, EIF3S7, EIF4A, EIF4A2, ELF5, ELOC), ELOVL1, ENC1, ENDOG, SH3GLB1, HSP90B1, ENO, ENO1, ENPP2, ENY2, EPHB6, EPHB, ERF1, ERK1, MAPK7, ETF-QO, ETO, EXTT2, EZH1, FAAA, FABD, FAM152A, FAM175B, FAM176B, FAM54B, FAM76B, FANCE, FARS2, FASTKD1, FABP2, FBX4, FBXO11, FBXW4, FBXW7, FDFT1, FGF13, FGF16, FHL2, FBL, FIP200, FIT1, FKBP7, FKBP9, FKBP11, FLAD1, FLII, FLJ10204, FLJ11588, FLJ11730, FLJ14154, FLJ21820, FXN, FRS3, FNTB), FTSJ1, FUNDC1, G3BP1, GA17, GABP1, GADD45G, GALNT1, CCR10, OXTR, ADORA2A, GANP, GAS6, GATA, GATA-2, GATE-16, GC1QBP, GCKR, GCKR, GMCL1, GCN1L1, GCP16, GCS1,

GDF7, GMDS, GFM2, GFPT1, GGH, GGPS1, GGTB, GINS2, GIT2, NAGK), GLI-1, GLRX5, GLT8D1, GLUT3, GLVR1, PYGL, GMP2, GMPPB, GNPTG, GNT-IV, GOCAP1, CYBB, GPAA1, GPAM, GPBP1, GPR175, GPX1, GPX8, GCA, GSTO1, GSTO2, GTF3C6, HADHA, HAI-2, HBP1, HCD2, HDHD2, HECTD1, HECTD3, HELB, HELLS (Lsh), HERP, HES7, HEXIM2, HEY2, HGFR, HIFPH3, HINT, HISPPD1, HIST2H, HIST2HA, HIST2HAX, HMG4, HNPRNPA1, HNPRNPA2, HNPRNPC, HNPRNPDL, HNPRNPL, HNPRNPHP1, HPK1(MAP4K1, HRS, HSC70, HSD17B8, HSP60, HSP70, HSP90AA1, HSP90, HSPC117, HSPC142, HSPC148, HSPC152, HSPC171, HSPC296, HYAL2, HYPA, HYPB, IBP, IBP3, IBP5, ID1, IDH3A, IDH3G, IGFBP7/8, IHPK1, IKK, IKKA, IKKB, ILERS, IMD1, IMPA2, IMPAD1, ING2, ING4, INO80C, INPP, INTS10, INTS12, INTS2, INTS4, INTS8, IRP, IRP1, ISCA2, IST1, ITPA, IWS1, JAB1, JKAMP, JOSD2, JOSD3, JPO1, ZNF348, KLK8, KARS, KBTBD4, KCNH3, KCY, KIAA0859, KIN17, KLF11, KLF15, KLF5, KLHL3, KLHL32, KLHL5, KNG, KPR1, KTELC1, L2HGDH, LARP7, LASS2, LBH, LBP-1B, LCE4A, LCMR1, LDHB, LEF1, LGTN, LIN9, LIPA, LMAN1, LMNBR, LOXL3, LPP2, LRP16, LRR1, LSD1, LSM10, LSM6, LUC7A, M9, MAGED1, MAGMAS, MAML1, MANA, MAO, MAOB, MAP2K5, MAP3K3, MAPKAPK2, MAPKAPK5, MAP2K1, MAP2K4, MAP3K4, MAPK1, MARS, MAT1, MAX, MBD4, MBNL1, MCCA, MCM3, MCM5, MDA5, MDH1, MED8, METAP1, METTL1, MFAP1, MGAT2, MGAT4B, MGEA5, MGMT, MGST2, MIER2, MIPEP, MIZF, MKI67IP, MKK4/7, MKP-3, MKP6, MLH1, MLSTD2, MMAB, MMD, MO25, MOGAT2, MON1B, MP1, MPG, PMPCA, MPP1, MPP6, VDAC1), MRFAP1L1, MRG15, MRPL13, MRPL16, MRPL19, MRPL20, MRPL22, MRPL24, MRPL39, MRPL41, MRPL46, MRPL50, MRPL51, MRPL55, MRPS11, MRPS17, MRPS21, MRPS22, MRPS33, MRPS6, MRTO4, MSL3L1, MSRA, MST4, MTA2, MTA3, PRDM2, MTCH1, MTERF3, MTERFD3, MTFR1, MTIF2, MTMR4, MTMR6, MTMR8, mtNOS1, MTO1, MUL, MUTYH, MVK, MYNN, MYO1C, MTPN, NAA50, NAB1, NAB2, NACA, NCK2, NCOA4, NCOA6, NGFRAP1, NME9, NR2F1, NR2F2, IMMD, NDPK B, NDUFA1, NDUFA8, NDUFAB1, NDUFAF1,

NDUFAF2, NDUFAF6, NDUFB10, NDUFB2,  
 NDUFB4, NDUFB8, NDUFB9, NDUFC1, NDUF52,  
 NDUF53, NDUF54, NEK1, NLGN, NLGN2,  
 NSMASE, NFAT-90, NFE2L1, NFYC, NIFUN,  
 NIK(MAP3K14), NMI, NNTM, NOB1, NOL8,  
 NOLA2 (NHP2), NOP58, NP220, NPC2, NPM3,  
 NPWBP, NRB54, NRF2, NRIP, NSDHL, NSE4A,  
 PRDX6, NSUN5, NT5C3, NTH1, NUB1, NUCB2,  
 NUDT5, NUDT13, NUP35, NUP37, NUP107,  
 NUP205, NUP88, N-WASP, NXF1, NXF3, NXT1,  
 OAT, OAZ1, OBFC1, OCRL, ACP1, ODP2, OGG1,  
 ORC1L, ORC3L, ORMDL3, OSBPL3, OSGEP,  
 OXSM, CTNND1, RASA1, P15RS, INK4C, INK4D,  
 P47, P4HA, P4HA2, TP53, P84), PABPC3, PACT,  
 PAF65B, PAIP1, PANK1, PANK4, PAP39, PAPD1,  
 PAPOLG, PARP-2, PBX4, PC4, PCCB, PCGF6,  
 PCNA, PCNT1, PCTK2, PDCD2, PDCD6, PDE,  
 PDE5A, PDE8A, PDHA2, PDHB, DLAT, PDH,  
 PDHA1, PDIA5, PDCD7, PECI, PEG3, IKZF5,  
 PEO1, PERLD1, PRDX1, PFTAIRES-1, PGCP,  
 PGHD, PGRP-S, PGS1, PHF2, PHF6, PHKA2,  
 PHKA2, PPP1R8, PHOSPHO2, PHP14, PIK3C3,  
 PIK3R4, PI4KB, PI4KA, PIGA, PIGC, PIGF, PIGG,  
 PIH1D1, PIMT, PIR51, PIR, PITPNB, PLA2,  
 PLCD1, PLCD, PLCE, PLEKHA1, PM/SCL100,  
 PMCA1, PMGE, POLG, POLR2C, POLR2G,  
 POLR3B, POLR3C, PON2, POP5, POT1, PPP2CB,  
 PPP2CB, PPP2R5D, PPMIA, PPM1B), PPM1G,  
 PP2C, PP2C-DELTA, PPAP2, PPARD, PPCDC,  
 PPCS, PPIL3, PPM1F, PPOX, PPWD1, PJA1,  
 PRDM4, PRDX3, PRDX4, PRKAB1, PRKAB1A,  
 PRKAB2, PRKAB2A, PSEN, PSEN1, PRNP, PHB,  
 PRCP, PRPS, PS1D, PSMA2, PSMA3, PSMA5,  
 PSMA6, PSMB4, PSMB7, PSMB9, PSMB10,  
 PSMC4, PSMD1, PSMD12, PSMD6, PSMD7,  
 PSME2, PSPC1, PTP-1B, PTPLA, PTPN4, PTP-  
 PEST, PUR2, PWP2H, PXYLP1, PYCS, PYGL,  
 RAB5A, RAB6, RAB6A, RAD17, RAD51C,  
 RRAGC, RALA, RALB, RAMP, RAMP1, RARS,  
 RARSL, RASAL2, RBBP4, RBBP8, RBM10,  
 RBM15, RBM15, RBM17, RBM22, RBM5, RCOR3,  
 RDM1, REA, REN, RENT3B, RERE, RFP,  
 RHBDP2, RIF1, RIPK4, RIPK5, RKHD3, RLF, RLI,  
 RNF130, ARA54, RNF146, RNF167, RNF185,  
 RNF34, RNF6, DCUN1D1, RPA16, RPA39, RPB6,  
 RPB8, RPL22, RPL26, RPL26L1, RPL27, RPL27A,  
 RPL3, RPL35, RPL35A, RPP40, RPS11, RPS17,  
 RPS21, RPS27A, RPS27L, RPS30, RRP40,



RTN4IP1, RUVBL2, SAC3, SACM1L, SAE2,  
SAP18, SAP30, SAR1, SAR1A, SART2, SAT1,  
SBNO2, SBP2, SCNM1, SCPEP1, SCYL3, SDF2,  
SDFR1, SDHA, SDHAF2, SDHB, SDHD, SDSL,  
SEC618, SEC61A1, PTTG1, SELENOK, PDZRN3,  
TSEN15, ESPL1, SENP7, FAP, MSRB1, SRGN,  
SERINC1, SESN1, SF3A2, SF3B1, SF3B4, SF3B5,  
SFN, SFRP1, SFRS1, SFRS10, SFRS12, SFRS2IP,  
SFRS3, SFRS4, SFRS7, SFRS8, SGF29, SH3RF,  
SHARP (SPEN), SHC1, SIAH1, SKIV2L2, SKP2,  
SLC16A11, SLC25A24, SLC25A25, SLC25A26,  
SLC25A41, SLC25A5, SLC35B3, SLC44A3,  
SLC7A8, SMAR1, SMARCA5, SMG7, SMG8, SMN,  
SMP30, SMYD2, SMYD3, SNAPIN, SND1, SNIP1,  
SNRNPG, SNRPD2, SNRPE, SNRPN, SNX1, SNX3,  
SOCS6, SOD1, SOLH, SON, SOS, SOX11, SOX13,  
SP110, SP192, SP3, SPC12, SPF30, SMPD1, SPSY,  
SPT4, SRB7, SRP46, SRPK1, SRRF, SRSF8/12,  
SSAT, SSBP1, SSRP1, ST4S6, STK3, STRAD,  
STT3, STT3A, STYK1, SUCLG2, SUFU, SUGT1,  
SULF2, SUV420H1, SYHH, SYQ, TAB2, TAF12,  
TAZ, TAL2, TALDO, TAO2, TARBP1, TARBP2,  
TASP1, TATDN1, TBL3, TCEAL7, TCEAL8, LEF1,  
TDRD3, TER, TEX10, TFAM, TFB1M, GTF2A2,  
TFIIB, TAF10, TAF9, TFIIE, TFIIIA, TFIIC90,  
TH1L, THEM2, THRAP2, THUMPD2, THY1,  
DTYMK, TIEG, TIEG1, TRIM24, TIGAR, TINP1,  
SART3, KLK12, TLE, TLE1, TM6SF2, TMEM14C,  
TMEM39B, TMEM59, TMEM165, TNRC4, CDCA3,  
TOP2A, TOP2B, TOP2, TOPBP1, TOPORS,  
TOR1A, TPR, TRA2A, TRAF2, TRAF7, TRIB2,  
TRIM11, TRIM41, TRIM8, TRIP8, TRIP11, TRIP12,  
TRIP4, TRIP15, TRIP, TRIT1, TRMT11, TRMU,  
TRPT1, TRPV4, TSC22, TST, TTC9C, TTRAP,  
TUBA4B, TUSC3, TUSC4, TWIST1, TWISTNB,  
TXNDC12, TXNL4A, TY3H, UAP1, UBE1C,  
UBE2A, UBE2D4, UBE2E3, UBE2F, UBE3B, FAU,  
UBQLN1, UBLCP1, UBP3, UBPY, UBR7, UCHL3,  
UGPA2, UHRF1, UIP5, UNR, UQCR11, UQCRC2,  
UQCRQPC, USP39, UST, ZRSR2, USE1L, USP10,  
USP13, USP16, USP25, USP38, USP51, USP52,  
UTP6, UTP14C, UVRAG, VAC14, VAV1, VIPAR,  
VLDLR, VPS4A, VPS72, VRK1, WAC, WBSCR22,  
WDR3, WDR4, WDR12, WDR21A, WDR61,  
WDR75, WDR77, WDR79, WDSUB1, WEE1, WNT,  
WNT11, WRNIP1, WTAP, XBP1, XPA, XPB,  
XRCC6BP1, XRN2, XTP3B, ZBTB5, ZCCHC6,  
ZCCHC11, ZCCHC8, ZFC3H1, ZMAT2,

ZMPSTE24, ZNF25, ZNF92, ZNF140, ZNF180, ZNF181, ZNF198, ZNF221, ZNF239, ZNF263, ZNF265, ZNF280D, ZNF281, ZNF322A, ZNF364, ZNF434, ZNF460, ZNF462, ZNF481, ZNF484, ZNF509, ZNF593, ZNF595, ZNF620, ZNF627, ZNF646, ZNF653, ZNF664, ZNF684, ZNF687, ZNF777, ZSCAN29, YWHAB, YWHAH, YWHAH, PDE12, EIF4EBP2, EIF4E2. (1275)

Groups 1 and 2 Protein targeting to membrane and endoplasmic reticulum

RP40, RPL10A (CsA-19), RPL4, RPL7A, RPL8, RPL23, RPL23A, RPL24, RPLP0, RPLP1, RPLP2, RPS10, RPS13, RPS14, RPS16, RPS2, RPS27, RPS28, RPS4, RPS4Y1, RPS5, RPS7, RPS8, SEC61A1, SRP68. (25)

Metabolic process

APG7, NUP50, PCBP2, RPL7A, RPL23, RPL24, RPLP0, RPLP1, RPS2, RPS5, RPS7, RPS10, RPS13, RPS27, RPS28. (15)

---

\*see Table 4 for the summary. \*\*from top scored ten entries based on analysis on MetaCore portal from Thomson Reuters (<https://portal.genego.com>). 1 orthologous derivatives in the human based on rhesus monkey MHC (Mamu) sequence data (51) and database IPD MHC 2.2 (52).

Table S7: Scores<sup>a</sup> of immunohistochemical staining in epithelial and stromal compartments of endometrial functionalis of different sub-groups

| Compartment |  | Group        |              |              |                      |              |              |              | p-value <sup>b</sup> |        |
|-------------|--|--------------|--------------|--------------|----------------------|--------------|--------------|--------------|----------------------|--------|
| Antigen     |  | Group 1      |              |              | p-value <sup>b</sup> | Group 2      |              |              | p-value <sup>b</sup> |        |
|             |  | a            | b            | c            |                      | a            | b            | c            |                      |        |
| Epithelium  |  |              |              |              |                      |              |              |              |                      |        |
| ADCY5       |  | 1.5<br>(1-3) | 1.5<br>(0-2) | 1.0<br>(0-1) | 0.005                | 1.5<br>(1-3) | 1.5<br>(1-3) | 2.0<br>(0-3) | 0.6                  | <0.001 |
| AVEN        |  | 2.0<br>(0-3) | 2.0<br>(1-3) | 3.0<br>(2-4) | 0.04                 | 2.0<br>(0-3) | 1.5<br>(1-3) | 1.0<br>(0-2) | 0.01                 | <0.001 |
| CHRND       |  | 0.0<br>(0-1) | 2.0<br>(1-2) | 3.0<br>(2-4) | 0.001                | 0.0          | 1.5<br>(0-1) | 1.5<br>(0-2) | 0.05<br>(0-3)        | <0.001 |
| FOXD3       |  | 1.0<br>(1-2) | 2.0<br>(1-3) | 3.0<br>(1-4) | <0.001               | 1.0<br>(1-2) | 1.0<br>(1-2) | 1.5<br>(1-3) | 0.04                 | <0.001 |
| GJD4        |  | 1.5<br>(1-3) | 2.0<br>(1-3) | 3.0<br>(1-4) | 0.006                | 1.5<br>(0-3) | 1.5<br>(0-3) | 1.5<br>(0-3) | 0.95                 | 0.003  |
| MKS1        |  | 1.0<br>(0-3) | 1.5<br>(1-3) | 3.0<br>(2-4) | <0.001               | 1.0<br>(0-3) | 1.0<br>(0-3) | 1.5<br>(0-3) | 0.70                 | <0.001 |
| NNMT        |  | 2.0<br>(0-3) | 1.5<br>(0-2) | 0.5<br>(0-1) | 0.006                | 1.5<br>(0-3) | 2.0<br>(1-3) | 2.0<br>(1-3) | 0.04                 | <0.001 |
| TGFBR2      |  | 2.0<br>(1-2) | 2.0<br>(1-3) | 1.0<br>(0-2) | 0.007                | 1.5<br>(1-2) | 2.0<br>(1-3) | 2.5<br>(1-3) | 0.01                 | <0.001 |
| TOX2        |  | 1.5<br>(1-3) | 1.0<br>(1-3) | 1.0<br>(0-1) | 0.01                 | 2.0<br>(0-3) | 1.5<br>(1-3) | 3.0<br>(1-3) | 0.08                 | <0.001 |
| VWA5B1      |  | 1.5<br>(0-2) | 1.5<br>(0-3) | 1.0<br>(0-1) | 0.01                 | 2.0<br>(1-3) | 2.0<br>(1-3) | 2.0<br>(0-3) | 0.80                 | <0.01  |
| Stroma      |  |              |              |              |                      |              |              |              |                      |        |
| ADCY5       |  | 1.5<br>(0-2) | 1.0<br>(0-2) | 0.5<br>(0-2) | 0.77                 | 1.0<br>(1-2) | 1.5<br>(1-3) | 1.5<br>(1-3) | 0.29                 | 0.01   |
| AVEN        |  | 2.0<br>(1-3) | 2.0<br>(1-4) | 3.0<br>(1-4) | 0.04                 | 2.0          | 1.5<br>(1-3) | 1.0<br>(1-3) | <0.001<br>(0-2)      | <0.001 |

|          |              |              |               |        |              |              |              |      |        |
|----------|--------------|--------------|---------------|--------|--------------|--------------|--------------|------|--------|
| CHRNA    | 0.0<br>(0-1) | 1.5<br>(1-2) | 2.5<br>(1-3)  | <0.001 | 1.0<br>(0-1) | 1.5<br>(0-2) | 1.5<br>(0-3) | 0.15 | <0.001 |
| FOXD30.0 | 1.0<br>(0-1) | 1.5<br>(0-3) | 0.04<br>(1-3) |        | 0.0<br>(0-1) | 1.0<br>(0-2) | 1.0<br>(0-2) | 0.01 | <0.001 |
| GJD4     | 1.0<br>(1-2) | 1.0<br>(1-3) | 1.0<br>(1-3)  | 0.18   | 1.0<br>(0-2) | 1.0<br>(0-2) | 1.0<br>(0-2) | 0.11 | <0.001 |
| MKS1     | 0.0<br>(0-1) | 1.0<br>(0-2) | 1.5<br>(1-3)  | <0.001 | 0.0<br>(0-1) | 1.0<br>(0-1) | 1.0<br>(0-1) | 0.03 | <0.001 |
| NNMT     | 1.0<br>(0-3) | 1.0<br>(0-3) | 1.0<br>(0-2)  | <0.001 | 1.0<br>(0-3) | 2.0<br>(1-3) | 2.0<br>(1-3) | 0.07 | <0.001 |
| TGFBR2   | 2.0<br>(1-3) | 1.0<br>(1-2) | 1.0<br>(0-2)  | <0.001 | 2.0<br>(1-2) | 2.0<br>(1-3) | 2.0<br>(1-3) | 0.07 | <0.001 |
| TOX2     | 1.0<br>(0-2) | 1.0<br>(0-2) | 1.0<br>(0-1)  | 0.08   | 1.0<br>(0-2) | 1.0<br>(0-3) | 1.5<br>(1-3) | 0.01 | <0.001 |
| VWA5B1   | 1.5<br>(0-2) | 1.5<br>(0-3) | 0.5<br>(0-1)  | 0.03   | 1.5<br>(0-2) | 1.5<br>(1-3) | 1.5<br>(1-3) | 0.19 | <0.001 |

---

Immunopositive scores in different compartments were estimated using a standardized five scale subjective scoring system: 0 (<5%), 1 (5-25%), 2 (26-50%), 3 (51-75%) and 4 (>75%). <sup>a</sup>data are shown as medians with ranges. <sup>b</sup>nearest approximate values are given.

Figure S1

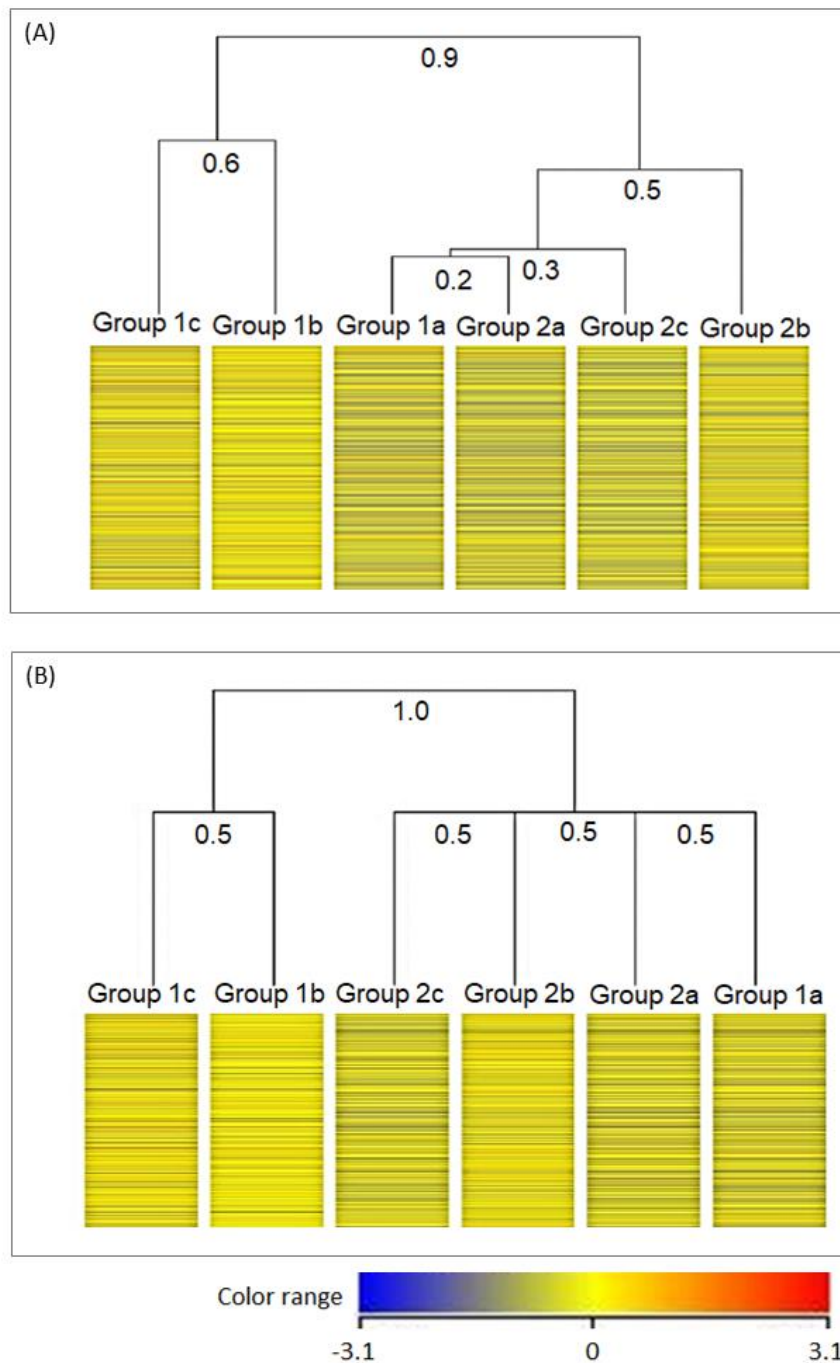

#### Legend to Figure S1

Group-wise two-way hierarchical cluster analysis of expression array data yielding highest segregation between peri-implantation stage (groups 1b and 1c) and other (groups 2a-c and group 1a) samples (A), while K-means cluster analysis revealing two distinctive clusters: cluster 1 comprised of groups 1a and 2a-c, while cluster 2 comprised of groups 1b and 1c (B). Note cluster distance (cd) 1.0 denotes complete segregation, while cd=0 denotes complete aggregation. Truncated expression data is shown.
